# Supplementary material for: An updated comparison of microarray and RNA-seq for concentration response transcriptomic study: case studies with two cannabinoids, cannabichromene and cannabinol
Source: BMC Genomics. 2025 Apr 23;26:392. doi: 10.1186/s12864-025-11548-3 (PMC12016467; doi:10.1186/s12864-025-11548-3)
Supplement: Supplementary file 1 — Supplementary Material 1: Table S1. Quantification of mapped reads for RNA-seq of CBC-exposed samples. [file 12864_2025_11548_MOESM1_ESM.xlsx]

## Sheet: CBC_Quantification
Table S1. Quantification of mapped reads for RNA-seq of CBC-exposed samples
Gene symbol	CBC_0µM_1	CBC_0µM_2	CBC_0µM_3	CBC_0.1µM_1	CBC_0.1µM_2	CBC_0.1µM_3	CBC_0.5µM_1	CBC_0.5µM_2	CBC_0.5µM_3	CBC_1µM_1	CBC_1µM_2	CBC_1µM_3	CBC_5µM_1	CBC_5µM_2	CBC_5µM_3	CBC_10µM_1	CBC_10µM_2	CBC_10µM_3	CBC_20µM_1	CBC_20µM_2	CBC_20µM_3	CBC_40µM_1	CBC_40µM_2	CBC_40µM_3
ENSG00000000003.15	1835	1724	2268	1374	2240	0	1981	1932	1969	2005	1305	2146	1876	2037	2289	1942	2080	1968	2616	2494	2044	1891	1682	1966
ENSG00000000005.6	0	0	0	0	0	0	0	0	0	0	0	0	0	0	0	0	0	0	0	0	0	1	0	0
ENSG00000000419.12	294	278	315	201	364	0	354	336	340	343	204	367	352	348	349	295	322	353	443	411	349	475	466	531
ENSG00000000457.14	284	239	346	211	312	0	272	286	302	287	194	305	269	288	330	321	314	275	382	373	363	369	338	421
ENSG00000000460.17	63	41	77	36	40	0	55	43	47	52	54	53	50	46	60	54	70	52	85	69	68	60	79	92
ENSG00000000938.13	0	0	0	0	0	0	0	0	0	0	0	2	0	0	0	0	0	0	0	0	0	0	0	0
ENSG00000000971.15	4430.81	4417.67	6108.55	3780.21	5830.23	0	5643.43	5343.25	5320.29	5668.35	3662.53	5481.26	4778.48	5124.13	5665.09	4580.32	4903.64	4514.87	6039.52	5609.3	4713.21	4909.3	4810.42	5401.47
ENSG00000001036.14	1521	1414	2029	1238	1767	0	1769	1692	1691	1822	1113	1748	1615	1698	2055	1814	1866	1782	2635	2421	1961	2653	2596	3050
ENSG00000001084.13	1234	1224	1616	983	1485	0	1418	1375	1322	1447	998	1497	1594	1736	1796	1641	1977	1781	2996	3056	2623	2982	2768	3309
ENSG00000001167.14	660	695	869	598	773	0	713	664	755	746	460	781	780	792	842	722	776	674	1088	1069	864	1343	1334	1388
ENSG00000001460.18	90	74	92	54	89	0	81	86	86	90	68	92	88	103	81	66	80	67	107	109	91	137	134	156
ENSG00000001461.17	223	213	294	207	283	0	272	254	274	279	170	262	258	293	315	233	274	232	329	271	274	358	379	406
ENSG00000001497.16	310	290	441	265	362	0	290	310	298	347	225	368	342	333	376	364	394	350	561	515	373	605	545	583
ENSG00000001561.7	294	301	389	243	323	0	337	294	366	331	214	371	349	358	392	329	321	311	464	410	351	561	531	626
ENSG00000001617.12	12	14	11	5	9	0	15	11	16	9	13	13	4	6	13	8	23	16	17	17	5	20	17	17
ENSG00000001626.15	17	7	7	9	11	0	6	3	5	7	2	7	3	6	5	3	7	5	19	4	5	13	5	5
ENSG00000001629.10	931	722	1128	721	1008	0	885	941	993	989	623	965	948	978	1123	851	977	899	1413	1352	1170	1634	1767	1937
ENSG00000001630.17	4076.19	4345.24	5519.17	3908.48	6107.98	0	6089.49	6044.03	5253.38	5421.9	3871.33	6357.71	5198.27	5493.97	5788.25	4554.11	4923.32	4474.84	6037.39	5648.03	4761.2	5274.89	4704.15	4883.13
ENSG00000001631.15	247.53	236.66	372.52	277	344.93	0	267.66	366.77	258.39	350.14	238.65	324.08	300.63	349.79	348.58	325.15	406.79	321.34	495.32	467.96	392.33	428.15	419.92	529.86
ENSG00000002016.18	162	149	201.33	137.32	223.07	0	194.2	186	189.52	174.26	127	203.1	162	186	181.48	149.23	182	192	283.21	312	274.4	183	173	212
ENSG00000002079.14	1	3	2	3	0	0	1	3	1	2	0	4	2	0	4	1	0	2	1	0	2	19	23	24
ENSG00000002330.13	227	246	318	201	265	0	225	286	249	247	167	271	222	259	269	216	230	199	352	283	203	231	185	244
ENSG00000002549.12	459	400	631	371	500	0	490	475	512	554	371	531	510	529	642	470	580	460	699	648	553	624	568	614
ENSG00000002586.20	2323	2348	3197	1855	2808	0	2568	2788	2691	2666	1813	2996	2550	2707	2816	2570	2973	2476	4000	3841	2811	3079	2825	2942
ENSG00000002586.20_PAR_Y	0	0	0	0	0	0	0	0	0	0	0	0	0	0	0	0	0	0	0	0	0	0	0	0
ENSG00000002587.10	3	6	3	0	2	0	2	0	1	0	1	0	0	0	3	2	2	4	3	1	3	17	8	8
ENSG00000002726.20	4	0	3	1	0	0	0	4	0	0	1	0	0	0	0	1	5	0	1	2	0	1	0	2
ENSG00000002745.13	0	0	0	0	0	0	0	0	0	0	0	0	0	0	0	0	0	0	0	0	0	0	1	2
ENSG00000002746.15	3	1	2	2	5	0	5	4	2	1	3	7	6	1	1	2	0	1	1	0	2	0	1	3
ENSG00000002822.15	233.17	188.52	301.07	181.13	263.49	0	228.21	229.3	291.91	240.13	145.67	249.72	206.07	262.69	297.92	254.19	306.71	275.5	403.5	324.48	303.8	253.75	267.46	278.02
ENSG00000002834.18	10042	9767	13806	8137	11573	0	10708	10753	11376	11439	7326	12317	10932	12214	12866	10981	12577	10719	17154	15835	12499	14733	13517	14705
ENSG00000002919.14	275	293	360	202	310	0	271	316	328	300	205	341	302	330	364	295	314	315	510	472	384	567	543	610
ENSG00000002933.9	1709	1743	2370	1466	2314	0	2197	2309	2096	2093	1431	2391	1903	2031	2137	1587	1987	1683	2508	2356	1923	2085	1745	2074
ENSG00000003056.8	1099	888	1309	768	1088	0	952	1006	1056	1079	665	1062	1010	1111	1212	1137	1161	1116	1792	1612	1329	2303	2212	2553
ENSG00000003096.14	190	206	272	200	295	0	248	274	285	263	159	301	277	273	291	230	260	214	267	283	225	132	121	152
ENSG00000003137.8	209	150	223	110	109	0	91	102	127	163	71	137	160	170	164	111	146	143	207	209	168	642	620	631
ENSG00000003147.19	454	382	574	343	532	0	514	480	501	466	323	528	463	437	526	429	494	511	712	737	636	846	759	822
ENSG00000003249.13	1106	1024	1451	728	964	0	929	956	1086	1065	621	1135	1092	1241	1274	1013	1339	1191	2058	1810	1412	1975	1702	1836
ENSG00000003393.15	873	779	1181	674	1053	0	978	889	944	988	613	1007	901	1018	1019	918	967	923	1351	1248	1118	1320	1279	1408
ENSG00000003400.14	209	215	305	208	281	0	299	262	278	292	162	281	213	301	276	237	282	215	346	343	264	382	342	356
ENSG00000003402.20	870.19	793.58	1184	606.38	941	0	847.46	790.46	886	1003.3	507	902.49	906.49	929	963.63	798.18	890.1	805.93	1113.74	1265.7	1035	1096.85	1132.21	1212.13
ENSG00000003436.16	1098	880	1304	812	1081	0	931	890	938	1131	625	999	1009	1072	1235	970	1112	1012	1642	1502	1238	3884	4109	4572
ENSG00000003509.16	193	251	333	186	292	0	272	257	332	259	183	295	266	252	282	273	272	280	431	377	374	340	290	343
ENSG00000003756.17	1465	1569.47	1995.29	1284	1744.73	0	1786.75	1699	1721.18	1690.08	1025.13	1727.78	1579	1696.72	1690	1569	1807	1677.3	2228	2569.43	2147.01	1829.38	1711.62	1909
ENSG00000003987.14	30	35	44	22	48	0	47	41	37	39	34	59	40	30	48	30	35	41	66	46	51	76	85	89
ENSG00000003989.17	1588	1727	2315	1544	2368	0	2190	2217	2135	2079	1432	2222	2105	2263	2340	2126	2255	1996	2868	2802	2378	2251	2137	2304
ENSG00000004059.11	1118.65	1130	1545	929	1308	0	1269	1224	1264	1295	820	1424	1158	1301	1338	1136	1348	1106	1776	1576	1270	1497	1377	1493
ENSG00000004139.14	554	491.89	753.68	385.42	591.72	0	540.05	569	556.37	594	370.07	690	607.04	597.15	631.82	535	626.69	528.98	801	751	609.68	495.42	355.62	416.33
ENSG00000004142.12	1983	2006	2695	1748	2754	0	2584	2426	2410	2308	1580	2646	2280	2381	2552	2116	2442	2199	3251	3116	2575	2592	2383	2536
ENSG00000004399.12	448	420	671	306	408	0	359	361	435	429	252	385	469	460	506	367	451	384	639	594	492	1680	1774	1779
ENSG00000004455.17	948.47	966.17	1310.65	809.01	1266.65	0	1096.81	1154.02	1139.79	1134.29	761.41	1297.36	1087.1	1107.24	1191.12	1115.13	1167.86	1044.15	1553.45	1484.21	1203.14	1564.82	1504.61	1702.95
ENSG00000004468.13	6	14	6	12	10	0	6	11	10	14	7	11	7	2	14	12	6	5	8	11	6	4	4	6
ENSG00000004478.8	965	822	1222	663	929	0	907	951	965	1025	626	939	988	1035	1162	1132	1177	1152	1944	1859	1370	2250	1951	2225
ENSG00000004487.16	1131	1078	1569	886	1270	0	1201	1194	1253	1318	845	1409	1274	1339	1412	1284	1413	1207	1902	1862	1534	1620	1512	1590
ENSG00000004534.15	1058	1033.53	1515.71	912	1324.27	0	1303.25	1307	1262.82	1321.92	834.87	1375.22	1177	1285.28	1258	1253	1420	1350.7	1903	2011.57	1665.99	1673.62	1550.38	1767
ENSG00000004660.15	10	7	4	5	5	0	4	9	7	12	9	3	9	3	7	7	7	2	9	10	8	14	14	10
ENSG00000004700.16	349	327.69	407	277	375	0	331	311	386	425	247	375	355	374	482	363	398	375	529	507	417	548	635	672
ENSG00000004766.17	337	296	412	226	387	0	410	322	331	378	230	349	357	339	394	349	398	295	535	525	465	510	512	634
ENSG00000004776.13	4	4	4	1	2	0	3	3	4	2	1	4	2	2	4	0	1	2	6	4	5	2	0	2
ENSG00000004777.18	32	34	27	24	20	0	20	20	26	19	13	22	23	21	16	20	21	20	25	23	22	14	15	29
ENSG00000004779.10	334	453	508	357	570	0	528	516	451	502	334	542	477	521	520	519	465	486	638	645	566	630	643	707
ENSG00000004799.8	13	26	24	17	43	0	44	37	26	28	19	33	22	25	40	12	22	17	29	26	25	14	25	13
ENSG00000004809.14	1	0	1	2	0	0	0	0	0	2	1	1	1	0	0	0	0	0	0	1	0	0	0	0
ENSG00000004838.14	3	7	2	7	7	0	9	4	3	12	3	12	6	8	9	13	6	3	12	6	11	8	11	16
ENSG00000004846.16	4	3	2	1	2	0	0	0	1	0	0	1	0	3	2	0	2	1	0	0	2	3	3	4
ENSG00000004848.8	0	4	2	6	0	0	1	3	2	5	2	2	0	4	3	2	4	1	3	1	0	1	1	7
ENSG00000004864.13	1183	1185	1498	958	1439	0	1325	1274	1337	1385	831	1438	1408	1426	1493	1344	1383	1305	1928	1863	1549	1981	1828	2113
ENSG00000004866.20	361	289	436.73	278	429	0	431	441	387	390.68	280	461	338	418	399	298	433	348	535	534.4	447	608	588	684
ENSG00000004897.12	991	863	1295	833	1125	0	1149	1190.94	1170	1145	755	1289	1173.9	1250	1322	1080	1213.94	1260	1509	1476	1213	1509	1463	1638
ENSG00000004939.15	0	0	2	0	0	0	0	0	0	0	0	2	0	0	0	0	0	1	0	1	0	0	0	0
ENSG00000004948.15	0	0	0	0	0	0	0	0	0	2	0	0	0	0	0	0	0	0	0	0	0	0	0	1
ENSG00000004961.15	288	251	386	241	363	0	311	349	335	344	235	328	313	318	409	331	364	343	421	432	409	513	546	541
ENSG00000004975.12	694	588	806	545	719	3	705	697	702	726	458	843	688	762	768	635	689	684	1084	922	760	925	837	945
ENSG00000005001.10	43	40	66	43	48	0	62	37	41	52	28	52	37	57	36	27	58	41	83	70	61	177	184	182
ENSG00000005007.12	2392	2336	3034	1806	2517	0	2453	2434	2607	2528	1791	2895	2382	2832	2840	2385	2817	2458	3758	3563	2763	3324	3047	3529
ENSG00000005020.13	230	195	241	160	189	0	208	246	242	207	134	220	198	237	260	223	234	227	327	323	282	449	460	489
ENSG00000005022.6	1888	1867	2524	1528	2534	0	2173	2219	2160	2256	1412	2400	2055	2254	2409	2246	2301	2045	3154	3011	2291	3035	2749	3088
ENSG00000005059.16	6	3	10	7	8	0	13	3	4	3	7	11	5	11	22	7	8	16	9	16	10	23	43	35
ENSG00000005073.5	0	0	0	0	0	0	0	0	0	0	0	0	0	0	0	0	0	0	0	0	0	0	0	0
ENSG00000005075.15	427	411.81	528.72	340.75	530.55	0	475.89	495.16	498.5	447.4	299.49	502.52	437.57	501.07	481.38	460.63	509.63	453.78	631.89	623.3	524.46	633.09	599.41	639.36
ENSG00000005100.13	350	311	454	239	345	0	321	321	353	348	222	347	330	371	410	387	422	339	571	590	452	617	608	659
ENSG00000005102.13	1	1	0	0	0	0	0	0	0	2	0	0	0	0	0	0	0	0	0	0	0	0	0	0
ENSG00000005108.16	58	49	69	41	60	0	38	29	58	48	37	47	62	67	96	53	63	79	82	99	81	399	461	460
ENSG00000005156.12	447	456	543	309	551	0	497	426	443	494	322	455	411	463	507	485	535	436	689	680	568	730	668	732
ENSG00000005175.10	349	344	459	273	426	0	374	362	375	415	280	357	397	392	487	430	458	452	532	506	480	570	491	668
ENSG00000005187.12	244	291	365	239	369	0	401	337	379	320	180	404	276	316	336	252	301	241	319	322	259	105	84	120
ENSG00000005189.19	46	71	55	51	87	0	77	69	63	57	52	65	76	55	80	63	76	84	70	77	56	48	34	42
ENSG00000005194.15	520	471	728	448	647	0	687	628	622	573	369.99	585	608	658	668	505	615	580	843	857	751	879	878	930
ENSG00000005206.17	1085.8	1170	1496	978	1423	1	1287	1412	1282	1212	904	1496	1149	1352	1255	1074	1410	1091	1696	1880	1377	1514	1367	1493
ENSG00000005238.19	321	304	436	261	326	0	332	297	294	322	250	375	284	339	335	282	344	328	526	439	376	742	666	735
ENSG00000005243.10	28	31	48	19	38	0	56	45	33	39	18	42	33	35	32	32	40	44	51	52	31	48	59	66
ENSG00000005249.13	6	7	13	14	8	0	16	7	15	7	6	5	7	11	8	11	8	10	11	14	11	12	8	14
ENSG00000005302.19	300	263	367	225	335	0	331	287	314	314	194	348	306	322	341	305	332	308	411	402	350	402	357	407
ENSG00000005339.14	1731	1611	2321	1478	1861	0	1786	1796	1880	1958	1182	1882	1742	1904	1978	1590	1925	1638	2602	2423	2121	2237	2165	2320
ENSG00000005379.17	68	72	84	76	80	0	91	72	85	91	46	108	71	115	79	97	72	76	109	118	72	37	21	37
ENSG00000005381.8	0	0	0	0	0	0	0	0	0	0	0	0	0	0	0	0	0	0	0	0	0	0	0	0
ENSG00000005421.9	81	102	133	94	159	0	132	119	121	99	78	121	118	85	106	101	119	114	101	100	86	30	37	46
ENSG00000005436.14	362	408	538	318	525	0	480	482	473	513	335	485	464	550	549	477	536	494	687	736	611	520	515	574
ENSG00000005448.16	15	14	20	13	5	0	10	7	15	21	7	6	5	13	16	9	16	17	20	11	12	26	38	41
ENSG00000005469.11	704	681	899	620	846	0	708	828	878	898	546	857	761	777	891	718	797	775	1002	1008	820	485	392	425
ENSG00000005471.17	109	104	119.82	85	146	0	129	140	130	122.91	74	143	121	137.75	159.43	126.83	129.92	129	186	165	119	209	210	221
ENSG00000005483.21	778	736	917	590	861	0	805	787	821	822	537	856	794	847	847	704	837	744	932	1011	840	984	911	1045
ENSG00000005486.17	872	828	1162	638	986	0	963	872	1044	999	589	1001	981	1011	1025	879	978	949	1341	1288	1096	1505	1397	1599
ENSG00000005513.10	8	2	7	0	1	0	2	2	2	5	2	3	1	6	1	3	2	3	5	3	5	50	54	59
ENSG00000005700.15	1554	1528	2085	1301	1875	0	1802	1778	1759	1850	1196	1861	1803	1932	2081	1710	1893	1782	2449	2508	2029	3164	3246	3598
ENSG00000005801.18	606	588	803	459	708	0	654	618	642	707	414	724	675	629	706	668	824	781	1143	1291	1066	1618	1540	1715
ENSG00000005810.18	759	665	912	592	790	0	748	787	771	845	502	757	833	779	995	741	886	753	1100	1126	932	994	1056	1192
ENSG00000005812.11	462	401	591	352	504	0	508	462	555	532	308	593	513	526	588	456	581	516	651	639	575	526	508	707
ENSG00000005844.18	143	130	160	145	226	0	204	195	187	177	125	213	166	145	169	133	155	122	176	127	121	56	58	60
ENSG00000005882.12	190	201	293	161	277	0	241	242	249	215	158	248	236	228	258	210	255	211	242	236	185	101	74	100
ENSG00000005884.18	221	145	266	145	176	0	174	161	164	182	108	172	169	170	184	174	161	165	251	182	181	824	851	873
ENSG00000005889.15	893	845	1208	740	1076	0	1041	1010	982	1084	660	1066	1040	1053	1209	958	1016	980	1305	1384	1208	1314	1400	1483
ENSG00000005893.15	2721	2507	3398	2179	3291	0	2929	2843	2942	3089	1927	3090	3039	3100	3618	2921	3216	3012	4306	3948	3173	4531	4551	5119
ENSG00000005961.19	3	7	4	2	3	0	1	4	2	6	4	3	4	4	1	5	5	5	13	6	4	14	7	4
ENSG00000005981.13	0	0	2	0	1	0	0	0	1	0	0	2	1	0	0	0	0	0	0	0	0	0	0	1
ENSG00000006007.12	1109	1017	1421	920	1213	0	1196	1062	1236	1251	762	1267	1079	1233	1252	1026	1255	1170	1627	1483	1270	2115	2133	2280
ENSG00000006015.17	345	383	581	333	446	0	397	441	418	408	289	469	363	475	432	375	476	385	706	679	483	556	467	544
ENSG00000006016.11	0	0	1	2	0	0	0	0	0	0	0	0	1	0	0	2	0	0	0	2	0	0	3	2
ENSG00000006025.12	106	126	168	87	120	0	111	128	118	103	74	160	102	132	125	125	153	114	176	190	141	170	212	223
ENSG00000006042.12	460	558.98	681	435	630	0	600	610	575	573	400	696	610	637	649	614	617.99	605	787	796	649	563.99	554	582
ENSG00000006047.13	27	23	32	19	44	0	47	25	36	41	16	34	29	35	28	21	31	20	26	25	20	7	20	15
ENSG00000006059.4	0	0	0	0	0	0	0	0	0	0	0	0	0	0	0	0	0	0	0	0	0	0	0	0
ENSG00000006062.17	156	113	194	100	142	0	159	118	124	144	92	150	140	143	184	128	160	154	230	207	191	396	394	369
ENSG00000006071.14	2	2	1	1	2	0	1	0	0	0	0	0	1	0	1	0	1	1	1	0	3	12	5	4
ENSG00000006116.3	9	5	11	4	10	0	6	12	6	4	2	8	2	6	3	4	8	4	10	5	4	4	3	5
ENSG00000006118.14	618	557	817	415	559	0	484	520	655	582	371	619	525	538	699	511	641	531	926	879	731	1275	1014	1058
ENSG00000006125.18	2304.97	2136.99	3095.95	1815	2679.96	0	2582.98	2413.99	2532.99	2498.98	1645.99	2606.99	2646.98	2609.98	2814	2339.99	2727	2437	3528.98	3312.97	2706.99	4334.94	4402.97	4751.99
ENSG00000006128.12	0	0	0	1	0	0	0	0	0	0	0	1	0	0	0	0	0	1	0	1	0	9	6	16
ENSG00000006194.10	418	418	591	381	473	0	439	473	502	484	343	541	515	496	529	534	578	485	745	730	657	747	783	818
ENSG00000006210.7	369	410	585	383	453	0	490	513	514	501	316	536	414	493	438	351	438	322	408	427	335	168	156	155
ENSG00000006282.21	831	764	1194	674	890	0	843	906	898	895	562	1000	788	859	929	805	951	834	1231	1307	990	963	804	893
ENSG00000006283.18	1	1	0	2	1	0	2	2	3	4	0	4	3	6	3	2	5	3	4	2	8	1	7	3
ENSG00000006327.13	2968	2880	4120	2060	2631	0	2427	2529	2869	2818	1870	3254	2867	3282	3507	2870	3416	2911	4960	4612	3417	6538	6046	6901
ENSG00000006377.11	0	0	0	0	0	0	0	0	0	0	0	0	0	0	0	0	0	0	0	0	0	1	0	0
ENSG00000006432.15	635	549	758	461	593	0	564	525	578	614	368	627	559	625	646	560	567	537	867	881	714	1268	1337	1369
ENSG00000006451.8	692	634.95	813	511	750	0	737	683	687	721	486	745.99	678	770	790	682	806	756	899	936	717	1110	1081	1324
ENSG00000006453.14	2165	1941	2792	1553	1964	0	2017	1888	2178	2334	1419	2170	2102	2202	2427	2067	2389	2196	3566	3485	2797	4100	3883	4231
ENSG00000006459.11	291	249	356	208	313	0	310	300	286	268	189	318	299	334	316	285	340	258	434	403	370	409	508	567
ENSG00000006468.14	22	18	22	15	7	0	17	15	32	25	10	9	18	22	20	22	20	13	21	24	16	97	83	95
ENSG00000006530.18	435	408	485	312	466	0	432	421	421	398	269	470	408	452	499	369	407	386	599	576	532	540	536	554
ENSG00000006534.16	84	88	139	79	89	0	81	107	125	128	62	131	73	103	121	100	99	96	135	93	96	67	43	51
ENSG00000006555.11	15	18	34	15	19	0	20	25	21	19	13	23	30	15	13	14	26	14	38	32	25	26	29	34
ENSG00000006576.16	161	143	203	134	148	0	149	143	180	203	107	156	127	148	183	140	122	143	231	194	172	302	310	357
ENSG00000006606.8	1	0	0	1	0	0	0	0	2	0	0	1	3	1	1	0	0	0	2	1	0	7	1	0
ENSG00000006607.14	371	310	453	288	401	0	345	402	377	443	236	402	403	430	457	370	454	380	627	628	534	558	486	544
ENSG00000006611.16	112	120	148	99	163	0	144	162	130	161	102	165	123	157	156	123	172	148	197	227	177	116	92	95
ENSG00000006625.18	223.43	215.99	263.85	169.36	266	0	266	235.09	281.98	259	163	302.72	275.6	245.64	263	240.39	267	226	364	353.15	296	328.93	335	363.97
ENSG00000006634.8	114.46	77.99	159.6	101.79	144.97	0	114.87	108.69	120.77	134.86	75.73	122.46	120.57	127	148.66	135.92	133.34	162.6	190.3	182.5	148.14	191.81	189.94	242.41
ENSG00000006638.11	0	0	0	0	0	0	0	1	0	0	0	0	0	0	0	0	0	0	2	0	0	0	1	0
ENSG00000006652.14	681	702	870	526	757	0	703	730	718	731	513	861	767	830	803	758	891	877	1301	1421	1140	1798	1719	2128
ENSG00000006659.13	0	0	0	0	0	0	0	0	0	0	0	0	0	0	0	0	0	0	0	0	0	0	0	0
ENSG00000006695.12	268.86	276.05	389.9	252.42	380.45	0	300.4	351.78	359.94	344.91	226.07	400.02	275.52	317.71	402.78	335.07	338.28	294.72	466.86	486.33	405.86	532.97	496.28	542.02
ENSG00000006704.10	258	205	368	177	243	0	243	226	267	235	157	308	243	286	290	255	268	252	414	468	317	605	563	599
ENSG00000006712.15	566	541	724	433	578	0	567	611	600	662	416	621	560	639	705	561	683	597	928	863	648	1095	1072	1205
ENSG00000006715.16	844	863	1146	643	933	0	954	917	1001	1004	622	1030	982	1060	1115	945	1080	997	1359	1300	1098	1414	1386	1630
ENSG00000006740.17	119	122	154	98	139	0	110	142	116	114	72	141	125	126	140	118	143	139	243	230	190	276	297	345
ENSG00000006744.19	1091	1066	1413	814	1198	0	1090	1197	1221	1184	775	1275	1184	1166	1353	1084	1237	1173	1691	1643	1239	1503	1419	1531
ENSG00000006747.15	2	4	2	0	3	0	2	9	3	4	6	1	6	6	8	3	6	8	1	11	3	4	6	4
ENSG00000006756.16	1299	1258	1788	1077	1560	0	1483	1375	1553	1513	940	1501	1613	1715	1781	1652	1705	1705	2559	2285	1984	2165	2068	2297
ENSG00000006757.12	331	291	430	304	449	1	398	406	400	409	268	416	357	410	434	372	387	387	489	476	436	403	419	399
ENSG00000006788.14	1.02	0	1	1	0	0	0	1	0	0	0	0	0	1.01	1	2.07	0	0	0	1	0	0	0	0
ENSG00000006831.10	1012	985	1408	935	1208	0	1172	1154	1118	1193	789	1160	1128	1155	1234	1050	1173	1111	1563	1460	1228	1887	1680	1931
ENSG00000006837.12	7.99	7.99	7.27	12	12.21	0	13.89	10.74	11.65	17.67	9.03	13	11.15	7.93	38.29	19.32	17.04	21.99	13.65	7.53	26.59	10.47	6.31	13.83
ENSG00000007001.12	3	7	12	8	13	0	16	10	7	9	4	13	13	9	8	4	9	2	3	4	4	1	1	1
ENSG00000007038.11	0	0	0	0	0	0	0	0	0	0	0	0	0	0	0	0	0	0	0	0	0	0	0	0
ENSG00000007047.15	549	599	740	428	572	0	551	566	580	592	376	668	530	617	622	516	691	589	911	874	699	947	869	1005
ENSG00000007062.11	1180	980	1482	683	1042	0	806	747	993	1091	573	935	970	1066	1335	891	974	1012	1401	1298	1063	1767	1649	1875
ENSG00000007080.11	509	536	660	413	438	0	397	496	500	488	392	641	452	593	512	458	585	417	862	778	489	1050	801	918
ENSG00000007129.18	0	0	0	0	0	0	0	0	0	0	0	0	0	0	0	0	0	0	0	0	0	0	0	0
ENSG00000007168.13	1827.51	1628	2419.33	1382	1928	0	2035	1985.65	1876	1929	1358	2113.33	1962	2159	2211	1999	2145	1939	2833.66	2821	2224	3147.57	3049	3406
ENSG00000007171.18	4	0	2	2	3	0	1	4	2	3	2	1	1	4	2	1	1	7	3	2	2	7	5	3
ENSG00000007174.18	1	0	0	0	0	0	0	0	0	0	0	0	0	0	0	0	0	0	0	0	0	0	0	0
ENSG00000007202.15	2530	2472	3345	2162	3150	0	2859	2836	2978	3004	1878	2990	2894	3068	3130	2628	3060	2792	4161	3897	3170	4282	4169	4728
ENSG00000007216.14	24	32	40	23	31	0	29	49	33	36	25	31	29	40	29	32	29	23	24	34	19	2	0	3
ENSG00000007237.18	39	20	51	19	28	0	27	27	28	51	21	32	34	37	49	37	26	26	53	49	30	58	71	68
ENSG00000007255.10	161	174	195	140	188	0	170	169	198	172	107	207	163	199	189	141	179	147	222	237	174	186	162	200
ENSG00000007264.15	0	0	0	0	0	0	0	0	0	0	0	0	0	0	0	0	0	0	0	0	0	0	1	1
ENSG00000007306.15	0	0	0	0	0	0	0	0	0	0	0	0	0	0	0	0	0	0	0	0	0	0	0	0
ENSG00000007312.12	0	0	0	0	0	0	0	0	0	0	0	0	0	1	0	0	0	0	0	0	0	0	0	0
ENSG00000007314.12	18	27	26	17	22	0	21	26	24	34	8	47	31	26	28	9	42	26	42	59	33	76	61	61
ENSG00000007341.19	140	132	177	99	177	0	133	117	150	158	73	171	136	159	170	153	172	157	215	199	157	209	247	265
ENSG00000007350.17	0	0	0	0	0	0	0	0	0	0	0	0	0	0	0	0	0	0	0	0	0	1	0	0
ENSG00000007372.23	0	0	0	1	0	0	0	0	0	0	0	0	0	1	0	0	0	0	0	0	0	2	5	3
ENSG00000007376.8	326	276	407	245	295	0	281	313	321	316	214	357	338	323	341	283	320	248	515	442	328	638	490	639
ENSG00000007384.15	782	747	1037	622	774	0	722	733	784	825	505	805	709	803	736	690	839	671	1041	1094	838	1049	1121	1119
ENSG00000007392.16	467	493	606	387	522	0	515	488	519	523	343	586	523	555	552	599	640	553	814	893	728	663	580	737
ENSG00000007402.11	9	10	33	10	27	0	14	8	15	20	7	11	16	14	19	7	19	7	16	7	10	8	2	6
ENSG00000007516.13	96	110	149	93	138	1	146	145	136	124	96	150	118	145	140	129	169	104	137	146	148	125	88	101
ENSG00000007520.4	643	680	890	547	711	0	704	703	700	729	484	774	649	753	762	679	814	654	1176	997	850	1328	1069	1203
ENSG00000007541.16	466	429	626.29	326.37	440	0	434	439	467.78	474.17	309	581.06	468	524.85	516.52	433.06	570.21	436.45	708	724.11	534.02	731	649	704.83
ENSG00000007545.15	489.18	522.35	629.02	397.4	490.63	0	518.15	484.3	515.18	570.75	337.58	581.58	523.43	548.42	553.69	489.89	604.26	503.67	785.22	817.69	689.57	792.15	750.82	812.3
ENSG00000007866.21	588	555	787	430	600	0	547	523	622	576	381	657	560	593	658	562	684	547	823	932	694	786	701	913
ENSG00000007908.16	1	0	0	0	0	0	0	1	0	0	0	0	0	0	0	0	0	0	0	0	0	0	0	0
ENSG00000007923.16	892	790	1032	706	1009	0	932	882	997	918	599	1002	943	958	964	881	1086	829	1303	1366	1165	1349	1210	1444
ENSG00000007933.13	1	0	1	0	0	0	3	0	0	1	0	1	0	0	1	0	2	0	0	1	0	0	0	0
ENSG00000007944.15	40	46	65	36	49	0	44	41	40	56	19	43	33	47	49	19	49	28	38	29	43	20	22	39
ENSG00000007952.18	0	1	0	0	0	0	0	0	0	0	0	0	0	0	0	1	0	0	0	1	0	2	0	4
ENSG00000007968.7	3	0	2	1	0	0	0	0	2	5	0	3	1	2	2	0	0	0	6	4	2	0	1	2
ENSG00000008018.9	1296	1194	1602	938	1472	0	1401	1367	1330	1366	830	1514	1276	1331	1533	1357	1458	1332	2129	2018	1529	2381	2205	2613
ENSG00000008056.14	7	10	13	11	9	0	5	6	7	14	5	8	10	6	6	4	7	4	7	20	17	18	14	18
ENSG00000008083.14	333	315	454	304	423	0	347	382	347	396	260	376	347	403	357	309	381	336	430	476	369	430	489	482
ENSG00000008086.12	244	261	338	204	272	0	262	257	239	262	181	290	273	249	298	233	266	286	303	368	264	277	286	307
ENSG00000008118.10	1	0	0	0	0	0	0	1	0	0	0	0	0	0	0	1	0	1	0	0	0	1	0	1
ENSG00000008128.23	324.2	283.96	396.97	232.59	374.17	0	322.7	324.74	359.34	383.65	213.81	400.29	362.65	327.03	337.1	341.12	337.7	356.1	481.96	548.8	467.5	460.26	459.42	516.33
ENSG00000008130.15	1167	1288	1590	969	1307	0	1256	1315	1373	1391	881	1426	1357	1443	1412	1307	1497	1292	2161	2002	1638	1853	1599	1863
ENSG00000008196.13	0	0	0	0	0	0	0	1	0	0	0	0	0	0	0	0	0	0	0	0	0	0	0	0
ENSG00000008197.4	0	0	0	0	0	0	0	0	0	0	0	0	0	0	0	0	0	0	0	0	0	0	0	0
ENSG00000008226.20	15	16	26	16	24	0	14	18	12	12	21	24	27	26	12	15	11	10	46	38	16	9	9	18
ENSG00000008256.16	278	236	323	173	235	0	217	231	211	203	129	266	230	233	271	238	238	211	322	302	252	319	324	341
ENSG00000008277.14	37	40	47	22	70	0	29	47	26	44	19	33	34	33	33	26	38	33	37	38	38	26	36	32
ENSG00000008282.8	1070	1061	1475	894	1339	0	1205	1207	1343	1332	845	1330	1247	1290	1468	1212	1408	1326	1862	1794	1539	1814	1826	2183
ENSG00000008283.16	201	204	268	159	222	0	221	282	231	232	160	262	196	226	252	216	237	196	314	248	228	251	272	316
ENSG00000008294.21	1389	1295	1934	1103	1686	0	1496	1594	1544	1608	1098	1624	1502	1684	1730	1448	1817	1463	2296	2329	1950	2927	3317	3628
ENSG00000008300.17	281	239	375	239	291	0	289	283	312	278	208	300	263	289	276	228	318	238	364	416	314	365	380	379
ENSG00000008311.15	485	552	673	454	693	0	826	787	687	684	449	868	673	704	638	664	744	605	794	992	745	396	354	464
ENSG00000008323.15	594	642	849	558	780	0	830	764	725	816	546	932	787	856	858	727	862	795	1196	1150	948	481	383	475
ENSG00000008324.11	82	83	115	81	102	0	105	88	84	94	76	107	89	96	115	90	113	88	146	122	106	155	153	182
ENSG00000008382.15	201	250	330	191	274	0	262	259	285	265	183	323	243	278	310	258	276	230	400	356	292	220	233	274
ENSG00000008394.13	2748	2715	3535	2373	3998	0	3996	3726	3485	3755	2411	4151	3721	3879	4094	3455	3889	3622	5838	5296	4442	5909	5748	6219
ENSG00000008405.12	291	245	422	220	315	0	281	245	289	306	177	307	258	275	345	276	312	265	428	350	290	368	349	358
ENSG00000008438.5	0	0	0	0	0	0	0	0	0	0	0	0	0	0	0	0	0	0	0	0	0	0	0	0
ENSG00000008441.16	187	180	232	123	200	0	187	179	189	177	124	228	184	205	190	161	182	177	241	226	187	272	239	242
ENSG00000008513.16	1995	1850	2488	1586	2358	0	2365	2407	2172	2254	1492	2501	2221	2356	2389	2003	2231	1866	2639	2579	2061	3210	3436	3544
ENSG00000008516.17	22	26	35	20	35	0	22	34	14	21	20	31	20	41	22	25	16	21	41	31	26	56	48	69
ENSG00000008517.16	4936	5229	6895	3727	5598	0	5562	5548	5224	5239	3396	6029	5356	5803	5664	5299	6039	5127	8965	8127	6443	11535	10591	11055
ENSG00000008710.19	1151.86	1233.05	1596.98	1006.44	1259.31	0	1176.45	1287.77	1262.73	1263.93	943.45	1414.88	1285.14	1447.34	1263.43	1170.71	1455.02	1129.99	1968.18	1962.46	1572.64	1888.6	1812.92	1875.25
ENSG00000008735.14	58	72	74	62	52	0	54	97	74	70	44	72	80	80	78	70	93	59	130	110	97	170	179	162
ENSG00000008838.20	977	911	1355	818	1056	0	1089	1042	1108	1100	694	1252	1017	1111	1105	903	1099	954	1429	1418	1058	1406	1364	1419
ENSG00000008853.16	528	605	774	514	740	0	681	684	643	657	456	724	622	714	673	655	694	632	912	918	715	1003	982	994
ENSG00000008869.12	593	579	708	484	652	0	550	584	659	648	374	580	628	665	656	596	624	618	800	787	676	865	774	916
ENSG00000008952.17	1505	1408	2039	1232	1803	0	1708	1621	1727	1718	1061	1699	1769	1744	1963	1719	1961	1747	2377	2412	2056	2639	2823	3082
ENSG00000008988.9	3118.74	3076.97	4346.34	2542.22	3760.11	0	3328.25	3490.43	3572.8	3370.51	2203.86	3704.46	3173.36	3279.61	3793.87	3341.76	3769.16	3268.49	5027.18	4681.97	3595.81	5577.34	5218.2	6186.3
ENSG00000009307.16	5775	5646	7551	4654	6922	0	6707	6546	6529	6751	4058	7053	6514	6902	7524	6349	7060	6607	9760	9021	7476	10915	10856	11916
ENSG00000009335.18	1332	1249	1809	971	1484	0	1483	1310	1491	1372	979	1542	1390	1630	1669	1337	1505	1458	2096	2060	1618	2010	1866	2198
ENSG00000009413.15	718	646	958	582	904	0	810	824	791	785	553	877	838	846	930	856	883	757	1083	1084	904	806	837	923
ENSG00000009694.13	48	64	70	72	65	0	81	84	73	86	63	87	65	64	61	45	59	61	67	71	54	13	18	28
ENSG00000009709.12	0	0	0	0	0	0	0	0	0	0	0	0	0	0	0	0	0	0	0	0	0	0	0	0
ENSG00000009724.17	443	437	475	340	469	0	559	553	456	462	315	624	416	493	471	395	483	436	645	594	444	449	354	452
ENSG00000009765.14	286	309	368	302	434	0	446	425	350	340	223	400	360	359	369	318	334	312	366	402	318	94	92	93
ENSG00000009780.15	88	82	122	76	112	0	125	85	96	109	66	128	91	96	116	85	115	70	114.57	119	135	102	120	123
ENSG00000009790.15	0	0	0	0	0	0	0	1	0	0	0	0	0	1	0	0	0	0	2	1	0	1	0	0
ENSG00000009830.11	551	492	649	400	511	0	538	532	580	560	363	531	564	612	592	546	612	578	957	919	747	1407	1367	1539
ENSG00000009844.16	652	641	851	545	831	0	670	756	770	750	457	731	823	737	851	703	802	718	1147	976	804	1087	1060	1116
ENSG00000009950.16	1505	1737	2270	1453	2455	0	2415	2440	2025	2028	1491	2660	1929	2067	1668	1518	2018	1534	2029	2256	1819	971	696	883
ENSG00000009954.11	1176	1057	1642	956	1402	0	1253	1235	1309	1406	832	1349	1289	1412	1552	1312	1436	1309	1981	1859	1576	1972	2071	2214
ENSG00000010017.13	595	578	818	501	676	0	705	605	694	695	388	679	656	647	745	617	728	598	980	886	762	1006	990	1148
ENSG00000010030.14	2	4	10	1	1	0	4	3	2	6	4	2	3	2	5	1	2	5	5	11	3	11	8	9
ENSG00000010072.16	187	155	226	133	203	0	182	192	191	177	113	156	196	181	212	172	186	190	285	236	192	226	224	259
ENSG00000010165.20	407	426	524	364	485	0	436	504	521	459	341	540	488	491	544	496	521	449	774	685	559	831	844	878
ENSG00000010219.13	128.73	128.71	156.82	90	167.53	0	124.27	153.1	138.23	149.97	106	147.16	147	144	138	159.62	147.94	140	192	190	166	254.85	282.45	346.97
ENSG00000010244.18	1718	1639	2327	1359	1968	0	2007	1859	1836	1969	1306	1951	1993	2014	2160	1927	2188	1885	2688	3022	2616	2615	2747	2859
ENSG00000010256.11	2340	2481	3420	2161	3048	0	2991	3054	2957	2978	1915	3325	2850	2969	3051	2550	3178	2467	3814	3567	2880	3413	3001	3308
ENSG00000010270.13	491	417	666	392	544	0	459	483	516	546	313	551	528	515	671	495	531	583	807	703	594	1061	994	1205
ENSG00000010278.14	31	28	41	22	30	0	42	34	33	28	24	37	36	37	47	22	28	23	61	54	38	442	518	521
ENSG00000010282.15	0	3	1	1	0	0	0	0	3	0	0	0	1	0	0	0	0	0	0	0	3	0	0	0
ENSG00000010292.13	391	361	544	300	403	0	398	375	404	437	246	436	387	428	474	394	489	402	654	621	491	616	596	617
ENSG00000010295.19	263	301	436	265	346	0	303	350	320	370	228	416	326	296	339	263	363	294	425	472	392	405	340	427
ENSG00000010310.9	100	80	131	77	77	0	67	59	98	104	48	95	56	96	97	76	99	67	169	182	130	389	428	366
ENSG00000010318.21	61	48	84	44	57	0	51	52	61	54	39	73	74	62	72	60	63	49	102	101	78	110	85	96
ENSG00000010319.7	15	16	16	20	17	0	14	23	28	18	19	25	13	45	16	37	37	16	56	47	43	44	47	41
ENSG00000010322.16	1531	1531	1998	1265	1847	0	1793	1651	1718	1757	1118	1841	1635	1825	1861	1525	1947	1507	2349	2313	1925	2135	1814	2026
ENSG00000010327.10	0	4	2	3	6	0	4	4	3	2	1	6	4	2	5	4	1	1	6	3	5	3	2	5
ENSG00000010361.14	95	72	120	87	94	0	107	98	102	95	62	93	111	134	92	79	105	54	175	116	109	118	77	105
ENSG00000010379.16	22	19	25	18	20	0	14	31	15	27	11	22	19	28	17	23	29	9	11	21	31	11	11	11
ENSG00000010404.18	771.41	574.42	854.27	495.23	629.48	0	584.13	507.49	640.68	710.21	402.69	576.6	704.5	674.39	745.56	609.65	639.65	727.87	1069.66	969.16	815.7	2495.2	2803.48	3028.41
ENSG00000010438.16	2	4	0	1	1	0	3	6	5	0	4	3	0	6.01	3	10	3	1	7	4	2	9	8	1
ENSG00000010539.11	165	159	243	150	202	0	204	162	223	242	132	184	175	211	198	185	212	194	296	292	201	286	240	266
ENSG00000010610.10	276	308	340	248	426	0	474	431	370	403	245	435	311	319	363	221	236	240	199	195	178	98	68	71
ENSG00000010626.15	33	53.02	68.98	41.18	47.92	0	57.85	40.43	50.78	66.59	34.87	52.41	45.21	61.74	68.71	46.51	74.24	62.59	71.36	68.5	62.39	76.47	72.06	59.08
ENSG00000010671.15	0	0	0	0	0	0	0	0	1	0	0	0	0	0	0	0	0	0	0	0	0	0	0	0
ENSG00000010704.18	81	107	114	88	145	0	130	127	115	120	76	96	108	139	129	102	97	118	157	157	132	136	119	134
ENSG00000010803.16	502	486	714	432	608	0	560	565	566	614	369	678	546	534	596	563	639	578	779	819	674	741	701	821
ENSG00000010810.17	245	163	261	116	212	0	136	142	183	201	126	178	176	180	238	187	175	186	279	284	252	564	518	608
ENSG00000010818.10	446	313	562	326	373	0	351	341	384	364	242	375	370	407	433	280	340	314	435	441	389	761	828	917
ENSG00000010932.17	31	30	29	25	25	0	54	42	26	21	9	35	20	27	24	18	36	33	13	13	19	3	0	0
ENSG00000011007.12	1092	1096	1513	932	1346	0	1324	1334	1319	1340	850	1474	1244	1374	1511	1214	1366	1251	1837	1803	1513	2042	2062	2296
ENSG00000011009.11	1174.89	1107.49	1581.65	884.9	1248.79	0	1167.76	1190.7	1282.26	1260.48	851.49	1306.2	1219.62	1274.33	1449.24	1135.57	1340.93	1152.47	1979.6	1783.83	1390.75	2690.29	2571.42	2827.46
ENSG00000011021.23	837	987	1159	731	1099	0	1037	1034	1049	1095	754	1177	903	1005	959	710	959.89	794	1100	1209	1024	1258	1111	1278
ENSG00000011028.14	2	1	3	3	3	0	3	11	0	1	0	5	3	6	1	3	2	3	2	1	1	0	1	2
ENSG00000011052.21	7.88	13.22	73.42	4.48	44.8	0	63.65	41.63	5.46	13.87	34.27	0	48.23	43.52	42.83	0	22.98	6.13	37.82	82.09	10.49	82.36	12.29	96.74
ENSG00000011083.9	0	0	0	0	0	0	0	0	0	0	0	0	0	0	0	0	0	0	0	0	0	0	0	0
ENSG00000011105.14	655	717	975	603	835	0	856	890	820	839	587	976	808	845	918	773	913	716	1165	1076	860	790	645	801
ENSG00000011114.15	785	768	1003	638	956	0	916	822	925	946	528	968	906	933	1078	778	853	856	1123	1112	963	1088	1062	1206
ENSG00000011132.12	336	331	446	263	373	0	300	337	367	339	210	436	359	360	376	343	423	341	650	633	424	850	734	816
ENSG00000011143.16	109	143	180	109	182	0	162	160	138	132	84	165	134	137	177	159	146	130	199	218	149	182	168	190
ENSG00000011198.10	318	300	499	232	405	0	364	360	372	390	225	364	348	409	425	363	344	396	531	482	413	877	950	1082
ENSG00000011201.12	19	13	21	16	22	0	24	11	19	26	20	12	9	17	31	18	20	29	23	31	25	33	27	35
ENSG00000011243.18	1347	1351	1787	1104	1514	0	1445	1493	1538	1452	1051	1788	1449	1544	1524	1396	1647	1358	2105	2098	1721	1679	1354	1595
ENSG00000011258.16	314	317	425	282	393	0	368	356	350	388	257	351	358	412	362	353	390	342	464	469	419	426	450	479
ENSG00000011260.14	234	205	309	197	264	0	214	163	253	241	147	265	237	236	263	221	280	227	424	333	285	456	415	501
ENSG00000011275.18	759	712.65	999	592.44	853.48	0	810.54	774	848.08	855	522	887.5	850	873.53	975	786.53	854	801	1262.59	1258.48	1001.58	1399.09	1469.03	1582.49
ENSG00000011295.16	489	464	655	361	582	0	507	530	502	535	361	556	542	567	584	578	571	585	795	813	642.32	889	858	1036
ENSG00000011304.20	4242	4117	5690	3366	4566	0	4042	4326	4608	4643	3008	4841	4533	4775	4876	4376	4950	4349	7511	6718	5313	7439	7093	8040
ENSG00000011332.19	0	2	5	3	5	0	0	2	2	3	4	3	1	4	0	5	4	3	3	7	1	3	4	1
ENSG00000011347.9	597	478	626	473	682	0	840	752	556	711	428	807	562	675	722	370	457	382	477	510	380	475	454	450
ENSG00000011376.12	485	479	709	390	576	0	580	563	512	589	384	584	531	555	598	515	586	470	769	789	610	665	599	690
ENSG00000011405.13	1502	1498	2004	1384	1977	0	1806	1811	1811	1879	1154	1889	1773	1827	2055	1688	1798	1675	2304	2509	2067	2606	2764	2957
ENSG00000011422.12	16	12	15	12	11	0	10	12	10	6	6	15	17	8	18	11	18	3	19	20	21	286	335	344
ENSG00000011426.11	158	95	250	96	125	0	87	98	120	159	72	127	126	130	209	110	140	129	135	134	110	80	87	132
ENSG00000011451.19	1168	1089	1598	916	1171	0	1144	1150	1279	1260	747	1355	1264	1394	1359	1074	1358	1105	1789	1788	1382	1798	1642	1981
ENSG00000011454.17	614	561	770	492	651	0	645	688	672	655	451	731	668	748	734	656	670	651	887	963	781	787	691	752
ENSG00000011465.17	0	3	1	0	1	0	5	2	3	1	3	1	1	1	5	1	0	4	2	2	2	2	0	0
ENSG00000011478.12	141	166	170	114	156	0	167	149	169	170	122	168	153	154	146	136	141	139	188	185	160	206	226	258
ENSG00000011485.15	1025	1146	1430	858	1213	0	1182	1201	1182	1165	855	1290	1067	1205	1090	1085	1242	1054	1593	1639	1260	1739	1564	1800
ENSG00000011523.14	257	203	317	194	262	0	260	258	268	254	156	255	246	275	303	300	338	280	490	481	361	573	514	531
ENSG00000011566.15	466	459	656	416	567	0	453	518	537	522	322	550	517	520	591	518	581	516	726	681	665	928	880	1001
ENSG00000011590.14	0	1	0	0	0	0	0	0	0	0	0	0	0	0	0	0	0	0	0	0	0	0	0	0
ENSG00000011600.11	0	0	2	0	3	0	0	0	3	0	0	1	3	6	2	2	0	1	3	0	0	1	1	0
ENSG00000011638.10	5	6	12	4	3	0	9	3	12	3	2	3	5	10	6	4	3	2	21	18	8	60	72	52
ENSG00000011677.13	0	0	0	0	0	0	0	0	0	0	0	0	0	0	0	1	0	0	0	0	0	0	0	0
ENSG00000012048.22	39	49	64	41	54	0	47	53	51	43	23	50	65	42	57	61	52	61	72	63	70	100	111	97
ENSG00000012061.15	250	262	299	182	289	0	256	265	272	275	203	266	265	259	282	263	332	268	414	409	314	611	605	698
ENSG00000012124.17	7	9	7	10	7	0	9	6	6	13	7	17	3	6	7	2	6	9	7	10	10	12	19	21
ENSG00000012171.20	168	188	249	171	203	0	217	203	198	181	129	239	219	244	200	189	234	187	289	324	247	212	202	234
ENSG00000012174.12	425	425	637	374	648	0	526	558	505	463	356.56	623.82	567.9	587.42	628.08	540	578.06	517	799	678.66	610	829.1	914.07	982
ENSG00000012211.13	144	155	214	115	154	0	155	145	176	175	84	197	116	176	180	123	182	143	231	241	181	353	324	327
ENSG00000012223.13	2	2	3	1	4	0	2	4	4	0	2	2	0	2	4	0	2	2	5	1	2	9	6	6
ENSG00000012232.9	937	775	1079	637	851	0	817	881	935	906	626	980	834	985	1009	808	941	852	1462	1250	1079	1801	1766	1894
ENSG00000012504.15	668	686	926	655	1004	0	1020	995	922	807	595	910	843	886	915	894	879	846	1004	1038	820	508	397	487
ENSG00000012660.14	1526	1394	1908	1226	1950	0	1935	1778	1642	1797	1120	1991	1632	1799	1876	1586	1678	1461	2001	1914	1588	4734	4974	5521
ENSG00000012779.11	4	6	6	0	10	0	10	8	6	2	6	17	9	3	7	11	6	8	14	12	8	10	20	14
ENSG00000012817.15	0	0	0	0	0	0	0	0	0	0	0	0	0	0	0	0	0	0	0	0	0	0	0	0
ENSG00000012822.16	711	804	943	652	836	0	858	922	866	862	616	931	855	846	880	768	878	800	1105	1115	975	1020	1053	1243
ENSG00000012963.15	259	243	350	211.69	299.76	0	280.25	270	292	329	165	291	263	314	333	276	303.9	284	400	385	349	480	429.83	499
ENSG00000012983.11	604	467	703	423	615	0	617	564	566	655	370	639	569	680	654	634	699	585	912	871	739	996	998	1209
ENSG00000013016.16	65	56	81	62	60	0	57	69	72	61	49	61	61	60	67	57	76	44	85	77	55	110	106	114
ENSG00000013275.8	934	954	1257	751	1040	0	996	1048	975	986	698	1153	1018	1086	1153	987	1177	1081	1713	1504	1200	2652	2580	3062
ENSG00000013288.9	1555	1452	1983	1141	1706	0	1636	1607	1575	1577	1108	1813	1510	1669	1753	1486	1688	1469	2093	2088	1650	1582	1530	1666
ENSG00000013293.6	0	0	3	3	0	0	1	3	0	0	0	0	3	3	0	1	3	0	2	1	0	0	0	0
ENSG00000013297.11	17	27	34	13	26	0	20	19	23	24	23	25	27	32	39	25	29	25	60	43.54	22	16	19	9
ENSG00000013306.16	1359	1371	1796	1058	1565	0	1511	1509	1595	1523	1025	1725	1438	1608	1602	1278	1616	1402	2287	2174	1628	2513	2411	2760
ENSG00000013364.19	381	448	537.54	318	506.85	0	474	420	472	448	326.61	462.79	467.97	504.38	485	420	475.46	447	655.5	628	460	921	851	914
ENSG00000013374.16	768	704	1032	600	941	0	900	863	873	795	594	962	820	941	970	861	916	840	1315	1172	987	1378	1482	1675
ENSG00000013375.16	1393	1350	1910	1160	1784	0	1623	1546	1542	1806	1125	1798	1627	1666	1814	1600	1705	1700	2180	2198	1831	2534	2640	3059
ENSG00000013392.8	124	142	188	135	198	0	167	175	159	205	129	199	150	203	192	146	190	161	196	202	223	152	162	136
ENSG00000013441.16	896	895	1327	812	1128	0	1163	1066	1027	1075	765	1135	1048	1031	1071	945	1154	1016	1325	1425	1189	1092	1136	1301
ENSG00000013503.10	349	363	484	323	434	0	433	451	417	469	251	440	420	490	456	408	447	391	593	540	466	499	443	511
ENSG00000013523.10	726.89	720.94	903.27	607.67	824.31	0	849.64	836.19	849.63	838.13	481.92	860.11	758.23	821.66	838.41	826.09	879.86	750.73	1058.78	1133.32	949.81	723.23	690.55	733.32
ENSG00000013561.18	908	855	1172	740	1161	0	1036	1043	1029	1031	646	1093	1031	1047	1146	1059	1086	1056	1517	1469	1196	1740	1613	1911
ENSG00000013563.14	343	304	394	256	354	0	318	331	366	339	269	371	379	331	424	349	396	333	511	578	415	824	781	852
ENSG00000013573.17	166.44	146.66	178.12	114.63	153.16	0	146.07	124.28	149.47	166.2	82.33	149.68	133.78	128.31	129.57	131.56	158.2	143.73	249.98	217.32	175.4	271.75	243.16	316.39
ENSG00000013583.10	1035	1215	1463	963	1431	0	1296	1411	1321	1251	859	1566	1202	1306	1381	1114	1410	1134	1662	1464	1246	796	812	772
ENSG00000013588.8	51	44	61	34	29	0	34	35	35	50	20	39	31	42	37	9	35	19	28	19	23	319	297	294
ENSG00000013619.14	268	276	362	218	405	0	370	373	347	321	198	364	279	328	283	234	300	263	331	266	217	327	270	332
ENSG00000013725.14	0	1	0	0	1	0	1	0	1	2	0	0	0	0	0	0	0	0	1	0	0	2	0	1
ENSG00000013810.19	167	127	216	97.81	153	0	104	129	122	139	119	154	139	157	148	144	197.57	156	210	241	136	167	188	212
ENSG00000014123.10	656	605	736	482	768	0	734	777	711	703	441	759	776	832	801	691	737	670	1015	939	728	1015	1013	1176
ENSG00000014138.9	43.3	22.91	78.56	40.43	64.67	0	54.21	35.51	42.91	101	19.48	32.94	34.55	87	79.13	61.93	108	43.83	97.95	133	68.31	92.71	110.44	82.27
ENSG00000014164.7	493	422	582	361	462	0	467	451	518	478	332	560	508	503	507	466	516	411	760	714	606	624	585	616
ENSG00000014216.15	2760	2868	3809	2374	3259	0	3166	3202	3402	3198	2103	3526	2963	3270	3221	2911	3213	2843	4492	4238	3251	4072	3751	4026
ENSG00000014257.16	4	6	6	6	8	0	16	12	7	12	6	5	6	6	12	7	10	5	6	11	2	3	2	0
ENSG00000014641.19	1235	1325	1660	1096	1774	0	1681	1624	1525	1449	1081	1742	1431	1502	1728	1389	1567	1381	1772	1846	1499	1674	1684	2054
ENSG00000014824.14	821	785	1097	727	1052	0	963	952	987	917	603	960	984	988	1107	936	1003	985	1315	1318	1152	1493	1404	1583
ENSG00000014914.21	99	123	173	101	145	0	127	150	136	128	87	139	112	150	133	142	160	117	210	212	191	326	326	334
ENSG00000014919.12	584.52	509.75	708.38	405.35	675.88	0	711.28	656.44	573.89	647.47	412.93	623.49	674.14	671.57	663.78	609.36	689.09	583.76	910.43	832.75	671.4	796.46	727.75	884.42
ENSG00000015133.19	879	822	1228	722	947	0	997	974	1007	1043	622	1021	920	979	1034	906	1001	891	1305	1244	1046	1084	981	995
ENSG00000015153.14	212	165	250	117	195	0	181	166	158	194	122	198	206	184	205	172	224	209	290	274	204	266	267	294
ENSG00000015171.19	1106	1082	1496	907	1322	0	1167	1142	1263	1268	853	1323	1320	1352	1373	1213	1371	1260	1683	1683	1441	1489	1611	1817
ENSG00000015285.10	43	68	50	39	43	0	58	56	53	51	29	63	66	66	51	43	46	41	46	63	48	38	11	22
ENSG00000015413.9	3	6	6	4	4	0	4	0	2	4	3	4	1	7	6	7	5	1	5	9	5	1	5	1
ENSG00000015475.18	214	199	267	153	200	0	190	197	239	193	160	224	240	246	245	182	249	217	395	381	289	538	458	522
ENSG00000015479.19	2406.15	2236.6	3218.29	1707.97	2680.72	0	2265.07	2194.58	2658.39	2624.75	1522.75	2563.09	2740.17	2708.03	3170.12	2670.66	3084.64	2530.91	4221.2	3955.42	3120.85	4597.34	3840.31	4750.22
ENSG00000015520.14	1156	1380	1689	1151	1758	0	1639	1553	1631	1564	1053	1777	1544	1616	1503	1351	1665	1338	2143	2098	1693	1638	1391	1447
ENSG00000015532.10	390	412	563	361	482	0	434	434	482	449	288	526	416	470	488	465	560	480	640	676	501	468	442	448
ENSG00000015568.13	402.58	190.78	401.02	172.1	249.39	0	277.44	259.56	461.02	151.5	180.3	395.13	436.24	116.57	22.54	305.13	135.54	267.72	201.81	262.36	392.47	313.45	297.91	702.72
ENSG00000015592.16	1	0	0	0	0	0	1	0	2	1	0	1	0	1	1	0	1	2	0	0	0	0	0	0
ENSG00000015676.18	1027	1072	1490	875	1279	0	1218	1228	1138	1230	824	1275	1266	1297	1299	1127	1225	1162	1954	1802	1518	1551	1430	1625
ENSG00000016082.15	1	0	0	1	0	0	0	3	1	1	0	0	1	1	2	0	0	0	0	1	2	1	9	2
ENSG00000016391.11	1123	1262	1671	1044	1531	0	1518	1493	1537	1583	1010	1723	1311	1479	1512	1287	1513	1211	1717	1761	1491	865	796	848
ENSG00000016402.13	0	0	0	1	2	0	1	1	3	5	0	1	0	2	2	1	1	0	0	3	2	1	0	0
ENSG00000016490.15	12	5	9	4	15	0	3	2	8	11	6	12	1	6	4	4	5	3	1	11	2	0	1	0
ENSG00000016602.9	0	0	0	0	0	0	0	0	0	0	0	0	0	0	0	0	0	0	0	0	0	0	0	0
ENSG00000016864.18	583	592	795	536	787	0	765	700	776	725	477	773	636	702	765	694	735	672	985	1019	736	831	769	932
ENSG00000017260.19	1086	1009	1412	855	1286	0	1173	1127	1134	1208	722	1083	1188	1185	1379	1047	1306	1233	1776	1716	1352	2067	2060	2322
ENSG00000017427.16	0	2	0	0	3	0	1	0	2	1	0	0	1	1	2	0	0	0	0	0	0	8	4	2
ENSG00000017483.15	8	4	10	5	7	0	7	10	6	5	5	4	4	7	8	0	10	6	9	5	6	25	41	45
ENSG00000017797.13	1991	1810	2662	1708	2422	0	2098	2108	2348	2200	1477	2338	2185	2382	2568	2069	2241	2137	3024	2999	2469	3214	2842	3282
ENSG00000018189.13	640	635	906	545	811	0	733	653	704	738	475	777	720	797	824	751	869	774	1180	1332	1094	1281	1282	1352
ENSG00000018236.15	1	1	0	0	1	0	0	0	1	4	3	1	2	3	0	0	0	0	2	0	0	0	1	2
ENSG00000018280.17	4	8	7	4	11	0	9	10	10	7	6	4	7	7	11	1	2	4	11	12	5	7	5	7
ENSG00000018408.14	196	129	193	109	125	0	127	104	170	173	91	103	129	125	197	125	135	129	167	140	140	190	216	245
ENSG00000018510.16	950	867	1297	742	1013	0	979	895	1012	976	618	986	1005	1093	1205	1065	1158	1062	1610	1513	1312	1807	1953	1996
ENSG00000018607.6	0	0	0	0	0	0	1	1	0	0	0	0	0	0	0	0	0	1	1	0	0	0	0	0
ENSG00000018610.14	133	126	194	108	172	0	151	149	158	135	115	180	168	159	178	168	195	145	213	226	189	198	183	235
ENSG00000018625.15	13	11	8	3	10	0	9	9	9	7	3	14	7	8	7	7	12	4	5	11	11	15	21	14
ENSG00000018699.13	183	163	227	141	219	0	211	186	241	193	133	220	187	189	223	243	224	202	280	287	251	376	306	349
ENSG00000018869.16	32	44	47	39	38	0	40	42	41	40	32	40	38	41	46	41	39	54	72	51	41	51	50	59
ENSG00000019102.12	11	6	12	9	11	0	14	7	6	8	8	4	12	10	5	8	8	15	7	11	8	18	15	9
ENSG00000019144.19	656	594	891	550	670	0	604	607	655	676	465	671	604	658	705	528	634	587	908	984	762	969	910	890
ENSG00000019169.10	0	0	0	0	0	0	0	0	0	0	0	0	0	0	0	0	0	0	1	0	0	1	2	4
ENSG00000019186.10	1	0	0	0	0	0	0	0	0	0	0	0	0	0	0	0	0	0	0	0	0	6	4	2
ENSG00000019485.13	174	156	269	197	224	0	183	216	229	237	128	256	234	215	234	173	244	220	310	321	275	287	269	324
ENSG00000019505.8	12	12	18	8	14	0	16	9	17	7	7	17	10	9	16	11	11	14	22	18	16	82	116	120
ENSG00000019549.13	271	326	410	224	350	0	338	337	339	311	230	359	311	336	386	287	329	338	353	370	333	512	492	549
ENSG00000019582.15	438	492	708	430	678	0	603	598	591	530	385	612	511	558	536	490	641	496	716	698	481	536	440	568
ENSG00000019991.18	1	0	0	0	0	0	0	0	1	1	0	0	0	3	0	0	0	0	1	0	0	0	0	1
ENSG00000019995.6	735.08	784.96	1039.43	635.25	938.96	0	865.63	827.47	840.39	907.43	566.42	901.41	799.32	910.42	950.7	883.42	889.15	832.18	1188.94	1222.8	1064.46	1284.31	1248.73	1381.56
ENSG00000020129.16	297	243	375	196	282	0	227	243	316	277	190	287	266	313	299	234	332	278	451	451	308	620	586	713
ENSG00000020181.18	7	3	4	1	3	0	1	3	2	5	10	5	5	4	9	2	9	2	6	11	2	20	21	8
ENSG00000020219.9	0	0	0	0	0	0	0	0	0	0	0	1	0	0	0	0	0	0	0	0	0	0	0	0
ENSG00000020256.20	183	195	279	184	263	0	223	201	239	231	119	269	228	217	233	232	275	230	346	315	255	436	415	397
ENSG00000020426.11	169	155	167	116	190	0	168	147	165	171	110	165	187	174	184	177	178	151	234	231	180	235	204	248
ENSG00000020577.13	1371	1273	1796	1071	1359	0	1283	1218	1404	1438	921	1448	1338	1355	1497	1219	1409	1208	1578	1555	1304	946	905	1186
ENSG00000020633.18	0	0	0	0	0	0	0	0	0	0	0	0	0	0	0	0	1	0	1	0	0	0	0	0
ENSG00000020922.12	259	230	334	192	313	0	318	290	273	302	201	292	238	273	308	276	327	311	431	423	379	461	436	507
ENSG00000021300.14	91	117	139	97	111	0	112	96	104	137	62	133	90	117	119	92	109	105	148	125	112	83	76	79
ENSG00000021355.13	886	798	1082	662	1123	0	890	952	991	1038	677	1064	937	909	1081	956	1045	966	1377	1370	1118	1500	1385	1453
ENSG00000021461.16	195	190	231	168	315	0	317	299	233	218	166	301	192	219	187	138	174	148	129	139	135	21	15	19
ENSG00000021488.13	49	47	77	43	66	0	53	61	51	58	41	52	51	49	40	48	57	62	74	78	58	43	54	36
ENSG00000021574.12	371	313	492	296	409	0	384	418	407	438	241	430	414	403	483	408	438	339	608	543	476	554	563	666
ENSG00000021645.18	341	362	502	281	421	0	355	331	440	411	286	393	406	421	437	339	421	378	466	454	428	460	429	488
ENSG00000021762.20	37	48	60	39	36	0	32	46	35	44	41	47	55	60	55	37	58	50	112	102	67	157	174	201
ENSG00000021776.11	594	533	795	430	714	0	685	657	624	653	434	672	681	715	858	636	746	661	914	906	753	873	880	1003
ENSG00000021826.16	1588	1879	2166	1680	3160	0	3371	3231	2096	2433	1680	2990	2100	2375	2272	1524	1571	1459	1237	1257	1111	318	350	407
ENSG00000021852.13	492	528	718	466	712	0	684	618	574	659	444	676	626	668	617	586	658	569	911	864	616	594	583	636
ENSG00000022267.19	2	2	4	1	1	0	1	2	0	1	6	0	5	2	3	2	3	6	3	1	2	18	18	27
ENSG00000022277.12	752	711	937.33	635	822	0	880	847	825	930	493.83	948	756	818	952	744	860	747.78	1169	1104	911	1232	1178	1318.45
ENSG00000022355.18	0	0	0	2	0	0	0	0	0	0	0	0	0	0	0	0	0	0	0	0	0	0	1	0
ENSG00000022556.16	0	0	0	0	0	0	0	0	0	0	0	0	0	0	0	0	0	0	0	0	0	0	1	0
ENSG00000022567.9	335	323	434	294	422	0	339	358	375	386	269	452	343	388	429	339	417	357	562	516	428	639	663	690
ENSG00000022840.16	2333	2252	3265	2048	2812	0	2623	2674	2743	2805	1718	2870	2575	2705	2863	2532	2833	2480	3855	3702	3030	4190	4080	4338
ENSG00000022976.15	145	128	191	108	169	0	139	156	146	139	80	161	125	137	170	132	166	124	228	244	190	188	177	197
ENSG00000023041.11	396	351	509	343	493	0	479	431	457	476	332	412	416	445	457	485	508	475	658	619	543	734	632	758
ENSG00000023171.18	49	49	63	29	78	0	83	63	61	53	50	84	72	78	51	50	63	59	79	80	73	163	189	187
ENSG00000023191.17	1297	1237	1863	1029	1468	0	1333	1361	1361	1372	940	1582	1353	1501	1582	1245	1658	1367	2291	2226	1779	2652	2532	2850
ENSG00000023228.14	1562	1623	2115.79	1312	1983	0	1825	2004	1832.41	1872.03	1251	2064	1757.68	2038	2105	1794.18	1927.73	1782	2490	2291.94	2051	2514	2668.18	2879
ENSG00000023287.13	1566	1321	2037	1132	1828	0	1532	1615	1618	1711	1080	1693	1665	1795	1933	1663	1799	1763	2581	2421	2133	3479	3627	4100
ENSG00000023318.8	1074	968	1368	841	1277	0	1143	1136	1216	1131	801	1311	1134	1197	1310	1076	1145	1114	1581	1519	1205	1670	1615	1926
ENSG00000023330.15	2374	2517	3318	2078	3298	0	3330	3111	3006	3019	2131	3518	2810	3151	3105	2703	3211	2744	3846	3899	2999	2851	2581	2903
ENSG00000023445.14	362	361	473	251	410	0	413	373	412	386	245	332	320	347	378	281	301	241	242	331	247	779	883	985
ENSG00000023516.9	892	829	1103	758	1044	0	991	1080	1088	1000	703	1013	1028	1064	1302	949	1044	976	1435	1419	1230	1421	1579	1752
ENSG00000023572.9	220	222	281	196	227	0	244	251	291	273	161	262	261	251	262	257	282	285	441	399	322	533	566	632
ENSG00000023608.5	40	56	75	53	54	0	31	51	55	59	29	55	51	57	52	75	61	67	80	62	53	83	81	95.83
ENSG00000023697.13	480	569	777	479	767	0	722	669	701	706	460	712	629	715	714	663	696	592	943	903	770	910	791	879
ENSG00000023734.11	1488	1447	1960	1175	1819	0	1563	1565	1650	1683	1064	1791	1571	1700	1974	1628	1852	1724	2578	2455	1920	3286	3317	3845
ENSG00000023839.12	2060	1903	2754	1663	2573	0	2446	2194	2465	2702	1656	2558	2837	2893	3123	2983	3259	3212	5285	5594	4722	4421	4136	4960
ENSG00000023892.11	29	35	53	25	35	0	33	20	30	30	20	36	31	37	40	26	29	30	54	52	27	39	33	26
ENSG00000023902.14	286	194	317	169	213	0	164	156	215	230	121	208	208	244	261	217	237	242	353	346	289	1402	1301	1420
ENSG00000023909.10	1314	1182	1697	980	1395	0	1383	1310	1371	1419	918	1528	1586	1722	1864	1648	1998	1775	2926	2878	2437	2876	2756	3259
ENSG00000024048.10	940	856	1168	698	1129	0	1030	1006	982	1059	705	1031	988	1078	1206	970	1011	952	1502	1410	1259	1362	1392	1634
ENSG00000024422.12	56	45	62	45	62	0	54	54	58	40	21	62	55	61	66	50	68	56	74	75	55	701	778	747
ENSG00000024526.17	26	16	20	19	17	0	10	22	14.9	22.6	11	16	18	16	32	19	20	10	13	30	16	8	8	19
ENSG00000024862.17	149	192	223	146	241	0	231	182	202	182	130	204	203	206	189	226	204	198	269	293	210	207	189	200
ENSG00000025039.15	254	220	297	221	319	0	294	294	313	290	209	314	302	312	339	295	345	293	526	478	403	901	983	989
ENSG00000025156.13	128	107	205	126	126	0	123	123	122	166	112	137	155	163	179	161	157	154	218	226	214	200	200	228
ENSG00000025293.17	334	316	402	254	340	0	307	313	321	346	232	369	310	380	394	324	373	378	514	476	382	459	482	533
ENSG00000025423.11	41	65	48	34	72	0	82	81	66	59	39	80	70	59	47	63	49	37	43	31	41	10	7	7
ENSG00000025434.19	567	591	796	460	692	0	675	696	645	652	509	811	626	709	662	593	687	537	884	813	691	574	500	599
ENSG00000025708.14	76	107.59	124.78	72.92	84	0	75.91	107.51	72.02	93.34	54.73	124.63	97.03	104	112.92	89.97	129.1	90.57	167.63	140.87	109.7	567.79	472.76	503.31
ENSG00000025770.19	356	390	481	285	392	0	419	387	415	427	283	436	426	428	422	377	481	354	637	566	468	721	674	787
ENSG00000025772.8	678	638	898	562	697	0	718	758	727	741	512	800	687	744	742	646	782	720	975	989	760	1040	915	1096
ENSG00000025796.14	1566.77	1635.64	2266.23	1311.65	2070.59	0	1939.68	1777.85	1785.79	1965.54	1260.75	2009.61	1890.88	2032.2	2160.67	1847.79	2116.19	1843.41	2634.45	2636.06	2159.71	3329.24	3266.16	3869.78
ENSG00000025800.14	1188	1145	1558	999	1283	0	1307	1364	1373	1371	875	1413	1276.51	1407.99	1445	1200	1278	1187	1767	1766	1483	1889	1926.5	2090
ENSG00000026025.16	8363	6104	10018	4709	5600	0	4544	4375	6135	6313	3488	5623	6010	6100	7629	5645	6486	6260	10264	9264	7533	24430	24174	26017
ENSG00000026036.22	129.48	181.77	240.44	142.78	143.13	0	171.78	114.18	145.18	151.87	79.62	227.79	161.36	193.24	124.19	148.41	192.83	194.9	243.01	313.49	243.42	318.05	279.74	281.23
ENSG00000026103.22	381	310	500	286	444	0	433	393	409	410	222	378	416	421	519	407	429	461	552	508	450	436	377	450
ENSG00000026297.15	799.83	840.73	1181.9	706.51	990	0	995.23	974.2	880.84	947	659	1117	824.4	989.54	927.88	831	995.91	800	1279.01	1228.08	963.06	876.83	729	811.98
ENSG00000026508.18	771	739	1049	521	743	0	726	710	675	800	456	805	761	757	897	780	917	842	1665	1482	1425	4333	4540	4629
ENSG00000026559.14	7	9	6	2	5	0	1	3	9	4	5	7	3	9	9	6	8	4	10	10	9	64	63	58
ENSG00000026652.15	265	242	321	180	282	0	269	272	267	267	185	311	261	255	307	258	280	262	350	381	319	364	412	449
ENSG00000026751.17	0	0	0	0	0	0	0	0	0	0	0	1	0	0	0	1	1	0	0	0	0	12	17	13
ENSG00000026950.17	222.24	239.01	303.38	187.35	342.37	0	258.61	269.87	285.23	261.57	195.85	320.73	263.64	288.31	322.32	253.25	278.15	228.14	280.49	303.38	283.21	200.58	223.17	246.51
ENSG00000027001.10	127	147	182	113	170	0	164	154	160	152	101	159	161	161	189	184	197	180	227	245	198	233	217	293
ENSG00000027075.15	53	42	77	43	38	0	50	47	46	50	38	58	57	51	49	53	61	51	100	78	52	73	65	92
ENSG00000027644.5	0	0	0	0	0	0	0	0	0	0	0	0	0	0	0	0	0	0	0	0	0	0	0	0
ENSG00000027697.14	1010	999	1408	753	1262	0	1168	1012	1123	1220	751	1227	1058	1185	1338	1151	1209	1122	1610	1525	1245	1973	1942	2231
ENSG00000027847.14	327	361	530	284	449	0	379	390	405	415	238	503	388	434	461	369	456	401	664	627	521	885	902	1046
ENSG00000027869.11	5	1	0	1	1	0	2	1	3	2	0	3	0	0	3	4	3	1	7	0	1	28	11	8
ENSG00000028116.17	289	249	353	235	293	0	268	213	273	286	170	242	315	292	289	290	291	302	413	432	370	511	442	541
ENSG00000028137.19	36	17	21	20	40	0	38	35	19	34	18	36	42	36	23	20	38	27	33	35	28	27	28	35
ENSG00000028203.18	910	806	1097	626	902	0	870	793	887	861	553	900	812	998	1014	932	879	877	1295	1336	1139	1589	1493	1742
ENSG00000028277.21	9	7	9	3	8	0	3	4	20	10	5	13	10	9	12	10	6	7	15	25	6	37	40	31
ENSG00000028310.18	434.96	372.86	508.06	295.24	423.1	0	383.02	400.35	432	441.19	286	427	426.12	480.98	504.1	487.02	515.95	456.04	672.12	735.96	595.27	770.81	701.85	772.65
ENSG00000028528.15	942	1013	1323	865	1244	0	1136	1160	1139	1185	771	1291	994	1206	1237	1002	1137	1067	1406	1523	1275	1290	1205	1379
ENSG00000028839.10	149	151	185	130	194	0	105	127	122	146	107	150	134	165	218	128	165	147	192	225	209	340	336	361
ENSG00000029153.14	145	103	178	77	88	0	79	83	130	116	61	127	116	116	138	111	87	99	146	133	136	383	454	403
ENSG00000029363.17	1619.91	1617.01	2338.71	1431.26	2007.43	0	1904.67	1752.52	1937.91	1849.32	1225.6	1833.68	1808.79	1960.38	2220.56	1947.57	2066.05	1897.09	2663.72	2631.29	2252.8	2470.88	2288.41	2790.2
ENSG00000029364.12	1284	1212	1756	1064	1533	0	1568	1616	1434	1419	949	1502	1460	1529	1656	1460	1573	1384	1937	1873	1604	2067	2069	2366
ENSG00000029534.20	75	73	78	48	62	0	72	70	75	87	40	49	64	58	85	61	69	44	54	59	53	87	77	95
ENSG00000029559.7	0	0	0	0	0	0	0	0	0	0	0	0	0	0	0	0	0	0	0	0	0	0	0	0
ENSG00000029639.11	184.88	209.73	244.12	178.83	238.78	0	238.21	231.39	198.34	252.85	144.47	262.18	193.84	235.15	267.36	212.46	246.78	233.93	325.88	329.3	240.87	312.63	247.33	326.12
ENSG00000029725.17	838	834	1069	690	976	0	960	958	938	1017	646	975	898	1070	1070	1030	1064	961	1436	1425	1206	1587	1384	1615
ENSG00000029993.15	398	364	529	286	313	0	329	313	318	347	207	330	348	383	447	344.99	390	413	540	516	455	788	806	787
ENSG00000030066.13	833	762	1047	679	891	0	843	830	861	837	560	901	889	898	1000	863	929	861	1178	1198	995	1042	1092	1241
ENSG00000030110.13	335.87	375.64	468	288.74	391.72	0	361	352.95	368.95	385.76	258.92	442.97	384.97	372.91	439.71	407.92	509.95	402	667.71	633.93	462.93	813.77	780.86	839.74
ENSG00000030304.14	0	0	0	0	0	0	0	0	0	0	0	0	0	0	0	0	0	0	0	0	0	0	0	0
ENSG00000030419.16	45	45	51	35	35	0	45	42	39	46	22	45	28	47	55	40	47	43	45	52	43	111	85	105
ENSG00000030582.18	2719	2552	3616	2061	2827	0	2681	2758	2868	2715	1769	3057	2543	2904	3164	2428	3058	2632	3858	3606	2752	4404	4028	4523
ENSG00000031003.10	588	511	737	485	595	0	592	618	609	637	394	626	635	601	691	592	686	607	874	865	812	719	763	809
ENSG00000031081.11	20	14	28	12	22	0	10	11	15	19	13	15	19	14	22	10	13	25	44	27	25	92	87	88
ENSG00000031691.7	47	42	57	24	49	0	38	47	53	47	31	52	52	64	50	53	54	39	69	66	56	59	57	69
ENSG00000031698.13	3131	2943	4131	2259	3513	0	3155	3263	3200	3254	2095	3594	3522	3658	3873	3716	4213	3875	6027	5824	4511	6297	6082	7015
ENSG00000031823.14	821	831	1051	617	903	0	767	774	804	809	595	893	860	880	888	756	885	854	1294	1217	887	1296	1129	1290
ENSG00000032219.19	332	326	476	332	443	0	481	389	397	455	270	461	396	399	456	310	409	380	481	469	387	302	340	348
ENSG00000032389.12	232	224	283	181	281	0	247	238	240	249	156	275	227	252	291	251	256	244	357	283	278	356	322	363
ENSG00000032444.16	976.33	987	1352	768	1091	0	997	1043.21	1105	1126	736	1147.87	1073.72	1183.43	1224.42	974.06	1116	920	1600.87	1514.78	1228.76	1728.3	1642.65	1693.22
ENSG00000032742.17	180	164	223	152	219	0	224	209	178	182	132	207	187	208	219	183	199	199	284	306	262	347	357	393
ENSG00000033011.12	412	436	600.57	315	456	0	473	473	525.99	539	318.96	479.23	488.16	530.63	556	431	516.64	474	730.78	655.98	535.75	733.99	751.58	773.76
ENSG00000033030.14	356	375	494	296	445	0	389	405	422	406	277	400	404	417	445	384	454	384	530	639	470	504	477	554
ENSG00000033050.9	417.13	368.58	455.07	278.48	346.16	0	354.54	369.34	362.79	319.18	243.88	404.4	361.63	422.96	414.32	374.46	364.13	377.13	595.64	618.63	554.69	629.77	649.29	714.15
ENSG00000033100.16	985	905	1325	804	1010	0	848	896	969	1089	657	1104	1026	1132	1185	907	1179	910	1710	1548	1241	2784	2829	3091
ENSG00000033122.20	4	4	11	3	3	0	5	5	5	3	2	8	3	7	5	10	2	8	4	5	8	0	2	2
ENSG00000033170.16	100	103	125	74	101	0	79	98	87	88	62	76	101	101	128	94	120	116	158	172	140	384	358	361
ENSG00000033178.13	775	724	1035	606	849	0	823	791	778	870	541	840	865	845	936	767	848	814	1124	1139	987	1402	1640	1688
ENSG00000033327.13	486	387	606	308	431	0	376	357	441	471	271	447	478	446	522	429	492	495	714	665	541	1163	1185	1337
ENSG00000033627.16	1901	1836	2515.38	1577	2272	0	2225	2133	2171	2197	1339	2368	2218	2430	2342	2327	2635	2227	3692	3677	2913	3495	3122	3517
ENSG00000033800.13	496	510	680	435	598	0	614	548	590	572	404	629	588	591	657	501	612	567	740	738	686	642	623	749
ENSG00000033867.16	320	236	404	215	270	0	245	239	255	346	168	250	295	325	370	279	317	301	462	497	388	855	920	1012
ENSG00000034053.14	130	126	169	102	126	0	124	100	133	140	74	136	117	138	157	126	164	151	245	196	185	406	364	359
ENSG00000034152.19	791	821	995	714	887	0	982	921	1007	900	583	993	847	893	980	835	976	817	1248	1221	885	1206	1220	1333
ENSG00000034239.11	2	1	4	3	7	0	4	3	6	2	4	4	1	5	2	3	5	7	7	5	4	2	0	1
ENSG00000034510.6	8613	7866	11550	6042	8655	0	8043	7747	8513	8340	5545	8964	8276	8982	9730	8524	9915	8469	13892	12656	9809	16949	14477	16071
ENSG00000034533.11	84	71	113	84	135	0	118	99	83	126	80	135	97	95	111	94	112	116	132	155	117	133	124	114
ENSG00000034677.13	950	807	1231	659	950	0	923	850	955	1054	593	1009	974	1040	1111	990	1043	928	1348	1447	1147	1248	1232	1506
ENSG00000034693.15	189.98	154	263	146	216	0	210	206	221	242	134	210	236	229.98	235	213.98	289.98	213	316.98	291	226.99	248.99	237	300
ENSG00000034713.8	617	602	880	486	660	0	620	640	624	647	423	768	704	718	773	709	754	670	1088	920	749	1210	1116	1350
ENSG00000034971.17	0	0	0	0	0	0	0	0	0	0	0	0	0	0	0	0	0	0	0	0	0	0	0	0
ENSG00000035115.22	943	813	1250	748	1107	0	997	985	1038	1046	651	1064	1006	1043	1099	1071	1154	1020	1473	1522	1231	1139	1028	1242
ENSG00000035141.8	795	771.89	985.98	580.97	863	0	806	764	817	882.99	550	938.99	886	911.99	952	860	994	895	1184	1186	1075.97	1259.99	1118	1373
ENSG00000035403.17	4392	3755	5652	2826	3910	0	3523	3499	4060	4109	2487	4039	3963	4409	4690	3743	4261	3921	5744	5429	4386	7398	7450	8016
ENSG00000035499.13	38	22	33	24	34	0	20	21	32	39	25	31	18	39	35	16	28	41	37	36	35	39	31	41
ENSG00000035664.11	132	105	160	79	125	0	133	108	130	113	80	137	99	93	132	122	121	99	160	163	153	216	198	238
ENSG00000035681.9	281	263	362	240	379	0	307	314	335	336	206	334	298	332	351	309	325	323	485	473	366	570	581	648
ENSG00000035687.10	458	407	547	310	440	0	395	416	469	472	267	514	464	472	568	464	490.99	526	655	682	501	934	913	1003
ENSG00000035720.8	0	0	0	0	0	0	0	0	0	0	0	0	0	0	0	0	0	0	0	0	0	0	0	0
ENSG00000035862.12	1122	998	1444	845	1215	0	1070	1081	1093	1103	630	1196	1160	1213	1206	1083	1332	1089	1844	1595	1413	4774	4732	4803
ENSG00000035928.16	1008	917	1315	865	1188	0	1200	1156	1162	1209	735	1264	1106	1185	1280	1063	1143	1106	1461	1487	1198	1466	1514	1734
ENSG00000036054.13	405	383	524	350	451	0	447	414	477	477	325	435	443	487	559	439	456	421	640	667	559	908	1041	1174
ENSG00000036257.13	978	858	1181	722	1044	0	1047	1013	1051	1069	707	1088	997	1086	1182	1020	1150	1045	1461	1427	1171	1629	1693	1861
ENSG00000036448.10	14	14	14	14	20	0	8	23	19	10	17	18	17	12	14	11	13	22	24	14	15	15	22	16
ENSG00000036473.8	323	311	392	286	564	0	516	473	429	373	288	483	425	409	415	403	407	302	368	351	317	38	32	39
ENSG00000036530.9	42	24	38	26	43	0	62	48	37	32	25	36	44	29	47	37	31	31	28	38	41	13	15	23
ENSG00000036549.13	563	496	815	506	737	0	654	597	636	693	406	623	719	626	725	609	733	680	981	931	754	853	902	959
ENSG00000036565.15	0	0	0	2	0	0	2	1	0	1	0	0	0	1	0	0	0	1	0	0	0	1	0	0
ENSG00000036672.16	63	69	106	69	92	0	101	87	82	85	50	101	86	95	68	99	112	71	131	119	114	95	78	113
ENSG00000036828.16	2	8	3	4	3	0	4	2	3	5	1	4	4	3	3	3	4	2	1	5	2	0	0	0
ENSG00000037042.9	193.32	200.67	259.52	164.59	279.32	0	225.11	206.91	239.46	228.47	155.93	269.05	206.97	249.61	246.96	190.03	247.83	213.89	306.78	388.78	299.91	274.67	257.96	278.06
ENSG00000037241.7	221.86	246.9	296.27	191.78	249.68	0	271.58	266.74	287.64	250.34	162.72	243.54	242.38	253.41	283.54	220.79	267.82	202.52	388.3	379.4	237.91	287.3	296.78	293.86
ENSG00000037280.16	1	0	0	0	4	0	2	1	1	6	0	3	2	2	1	1	2	3	2	7	0	7	7	6
ENSG00000037474.15	814	781	1042	565	834	0	803	786	835	856	567	890	840	939	928	847	919	849	1291	1189	1082	1520	1481	1667
ENSG00000037637.11	461	495	623	371	580	0	506	486	530	579	365	644	518	558	619	566	625	556	900	748	728	913	836	1037
ENSG00000037749.12	278	225	329	212	355	0	274	312	291	319	194	319	296	319	387	322	321	239	384	400	338	497	518	547
ENSG00000037757.14	348	394	469	298	372	0	336	352	381	403	254	427	391	411	427	361	451	426	617	679	527	608	556	610
ENSG00000037897.17	87	84	129	61	99	0	92	92	105	89	77	84	102	132	95	103	124	112	209	168	157	287	281	285
ENSG00000037965.6	0	0	0	0	0	0	0	0	0	0	0	0	0	0	0	0	0	0	0	0	0	0	0	0
ENSG00000038002.9	316	279	435	238	388	0	306	387	351	344	208	389	314	385	397	345	427	349	525	482	421	477	497	546
ENSG00000038210.14	539	533	727	418	672	0	666	659	537	605	437	685	666	687	731	568	746	583	845	852	773	717	732	825
ENSG00000038219.13	693	669	910	579	765	0	718	739	732	774	505	746	777	824	900	711	787	735	1029	1018	921	971	1157	1312
ENSG00000038274.17	600	658	776	495	784	0	732	707	768	714	503	807	748	713	824	727	792	700	978	978	788	921	844	986
ENSG00000038295.8	1	1	3	0	0	0	2	1	1	3	1	3	1	1	1	3	0	1	2	1	0	4	3	4
ENSG00000038358.15	1031.38	1055.45	1439.82	834.51	1147	0	1137.05	1104.53	1157	1228.63	780.35	1205.89	1086.33	1212.11	1239.03	1099.45	1300.05	999.72	1645.29	1531.19	1273.25	1616.3	1430.91	1534.74
ENSG00000038382.20	2391	2044	3086	1744	2167	0	2091	1991	2286	2251	1423	2283	2240	2396	2539	2031	2378	2008	3404	3206	2633	4021	4037	4337
ENSG00000038427.16	2669	1629	2913	1410	1625	0	1088	1134	1698	1868	918	1316	1925	1863	2562	1653	1772	1910	2757	2400	2213	6108	6509	6508
ENSG00000038532.16	662	564	861	473	654	0	576	590	634	698	389	677	626	747	692	601	608	576	988	899	776	1106	1143	1211
ENSG00000038945.15	8	7	6	9	11	0	7	9	12	14	9	15	24	15	22	16	7	18	13	20	19	11	8	9
ENSG00000039068.19	3694	3554	4822	3109	4849	0	4111	4147	4237	4192	2840	4533	4439	4717	4970	4232	4641	4250	6506	6165	5197	6233	5667	6369
ENSG00000039123.16	565	590	776	544	808	0	795	722	683	698	472	761	709	753	821	650	816	763	1039	1013	861	1001	1103	1228
ENSG00000039139.9	191	151	212	125	178	0	168	199	146	124	111	188	139	163	150	143	175	144	227	224	183	270	318	326
ENSG00000039319.17	773	681	973	615	882	0	788	804	826	865	472	869	801	876	939	733	881	798	1121	1057	1043	1058	1051	1226
ENSG00000039523.20	1188	1113	1686	937	1172	0	1082	1077	1102	1212	629	1284	1202	1240	1381	1093	1290	1087	1782	1605	1363	3248	3309	3679
ENSG00000039537.13	1184	1439	1801	1263	2145	0	2240	1953	1736	1796	1270	2127	1600	1752	1696	1439	1798	1504	1913	1839	1566	1005	829	981
ENSG00000039560.14	581	565	834	491	695	0	672	682	639	649	439	700	637	724	757	623	666	654	827	861	672	1400	1425	1520
ENSG00000039600.11	0	0	0	0	0	0	0	0	0	1	0	1	0	0	0	0	0	0	1	2	1	1	0	0
ENSG00000039650.12	251	243	340	212	292	0	236	250	277	271	163	303	232	265	236	276	310	232	428	484	363	773	630	718
ENSG00000039987.6	1	0	1	1	0	0	0	1	0	0	0	0	0	0	0	0	0	0	0	1	0	0	0	0
ENSG00000040199.18	245	229	343	199	267	0	262	232	254	258	147	263	272	273	336	265	254	256	397	360	341	309	359	386
ENSG00000040275.17	121	127	161	109	124	0	143	115	143	146	92	126	157	163	147	132	143	128	181	183	134	162	182	196
ENSG00000040341.18	591	545.45	703.06	429	669.25	0	636	642	640	627	392	632.98	608.29	681.2	702.96	572	677	592	831	795.29	716.38	595.04	599	660.09
ENSG00000040487.13	346	308	413	271	374	0	317	317	337	347	203	353	342	327	392	281	434	321	630	597	515	973	931	1026
ENSG00000040531.14	370	349	447	309	434	0	318	403	407	374	256	400	355	464	441	417	472	412	728	724	557	1138	1107	1238
ENSG00000040608.14	124	78	178	102	140	0	131	116	125	135	91	179	144	133	138	101	115	93	201	130	112	226	216	204
ENSG00000040633.13	698	623	786	423	635	0	614	654	614	718	457	689	610	753	813	725	743	682	1114	1005	864	1475	1400	1617
ENSG00000040731.10	222	202	274	157	219	0	210	192	234	246	155	226	196	216	242	187	220	164	259	257	231	127	81	97
ENSG00000040933.15	306	287	424	265	336	0	286	325	368	319	180	347	299	323	378	295	356	352	493	487	447	500	480	584
ENSG00000041353.10	27	14	25	35	20	0	21	24	24	40	15	19	27	18	38	16	28	29	42	35	27	337	454	415
ENSG00000041357.16	1233	1113	1597	971	1551	0	1376	1376	1383	1471	887	1501	1376	1411	1526	1351	1551	1381	2011	2011	1587	1968	1769	2056
ENSG00000041515.16	43	37	53	32	32	0	40	48	32	46	12	31	32	64	44	34	39	39	54	73	40	40	22	31
ENSG00000041802.11	488	426	603	355	479	0	458	471	499	538	312	517	490	546	601	473	541	542	868	807	671	936	896	1090
ENSG00000041880.14	51	51	62	37	64	0	69	64	46	71	43	59	62	46	57	42	62	69	101	93	72	154	132	166
ENSG00000041982.16	110	58	107	78	74	0	59	73	85	89	58	59	73	79	109	88	96	78	105	82	71	458	541	491
ENSG00000041988.15	131	131	163	100	150	0	160	117	169	152	97	163	144	167	167	135	158	134	194	208	175	201	198	153
ENSG00000042062.13	19	23	22	16	23	0	30	29	15	23	9	32	27	24	21	19	20	14	24	21	18	2	9	9
ENSG00000042088.14	205	200	234	154	228	0	197	176	223	212	110	223	193	258	241	216	261	221	363	303	237	414	380	469
ENSG00000042286.15	856	875	1188	678	1067	0	981	947	984	965	664	1149	1066	1082	1114	1108	1353	1052	1744	1635	1312	1539	1472	1559
ENSG00000042304.11	0	0	0	0	0	0	0	3	0	0	0	0	0	0	0	0	0	0	0	1	0	0	0	0
ENSG00000042317.17	129	118	169	101	163	0	126	157	140	150	89	134	143	156	154	143	159	148	183	201	133	182	157	158
ENSG00000042429.12	444.65	480.9	561.42	305	586.15	0	514.71	467.74	476.41	601.75	274.98	558.49	521.62	608.23	545.72	462.74	568.17	543.79	712.5	764.75	653.06	707.13	733.62	836
ENSG00000042445.14	1581	1484	1927	1321	2029	0	1892	1910	1882	1759	1146	2010	1809	1921	2077	1739	1992	1793	2553	2497	1976	1994	1912	2116
ENSG00000042493.16	409	419	594	325	437	0	463	452	444	451	307	525	437	492	582	427	535	505	813	752	530	752	721	798
ENSG00000042753.11	709	667	936	543	731	0	712	756	797	673	517	869	656	860	752	698	787	660	1043	1003	695	1261	1078	1213
ENSG00000042781.13	23	34	30	31	63	0	48	61	46	39	44	55	32	32	31	36	38	35	34	32	29	14	11	5
ENSG00000042813.8	0	0	0	0	0	0	0	0	0	0	0	0	0	0	0	0	0	0	0	0	0	0	0	0
ENSG00000042832.12	16	25	23	18	10	0	19	13	25	13	12	13	13	16	22	19	16	21	23	13	30	10	14	15
ENSG00000042980.13	26	22	33	13	17	0	11	15	26	26	10	11	17	28	28	20	24	22	31	34	20	94	65	57
ENSG00000043039.7	0	0	0	1	3	0	0	0	0	0	0	0	0	0	0	1	0	0	2	0	0	0	0	0
ENSG00000043093.15	719	691	910	550	811	0	805	798	759	811	468	813	828	814	995	712	814	770	1093	1096	909	981	1007	1082
ENSG00000043143.20	208	138	238	142	227	0	164	209	189	205	148	181	210	211	198	161	208	178	253	244	213	422	438	500
ENSG00000043355.12	0	0	1	0	0	0	0	0	0	0	0	0	0	0	0	0	0	0	2	1	0	2	0	4
ENSG00000043462.12	0	0	0	0	0	0	0	0	0	0	0	0	0	0	0	0	0	0	0	0	0	0	0	0
ENSG00000043514.17	151	156	238	124	173	0	137	176	171	210	109	201	164	192	179	156	171	184	268	276	204	240	236	238
ENSG00000043591.6	0	0	0	0	0	0	0	0	2	1	0	0	1	1	0	1	1	1	0	1	0	1	2	3
ENSG00000044012.4	5	7	0	5	4	0	2	2	2	0	5	2	0	2	3	0	5	2	1	1	1	0	0	0
ENSG00000044090.8	903	990	1263	881	1121	0	1060	955	1114	1069	720	1142	1014	1186	1119	915	1141	954	1520	1363	1214	1048	1053	1216
ENSG00000044115.21	6075	5804	7993	4755	6912	0	6291	6177	6449	6921	4302	7085	6709	7150	7770	6423	7150	6566	10052	9565	7904	11218	11236	11918
ENSG00000044446.12	1335	1363	1852	1076	1585	0	1667	1614	1616	1622	1095	1739	1518	1610	1596	1483	1747	1421	1982	2090	1765	1225	1128	1216
ENSG00000044459.15	176	184	269	165	266	0	215	212	209	232	155	228	225	212	231	220	225	254	295	275	242	271	261	281
ENSG00000044524.11	0	0	0	0	0	0	0	0	0	2	0	1	0	0	0	0	0	0	0	1	0	2	0	2
ENSG00000044574.8	12046	10795	15503	9516.99	13393	0	12480	12476	13175	13580	8624	13331	11961	13008	14573	11070	12232	11008	14122	13020	10516	17591.9	18545	22489.9
ENSG00000046604.13	1729	1512	2207	1307	1643	0	1514	1510	1718	1767	990	1708	1725	1787	2183	1662	1768	1712	2631	2423	2031	4451	4654	5087
ENSG00000046647.13	247	243	331	195	243.93	0	262	298	276	319	155	262	280	287	300	255	284	304	431	405	317	424	432	430
ENSG00000046651.15	624	629	850	443	682	0	623	567	625	661	367	653	578	659	677	677	682	633	924	921	814	863	778	819
ENSG00000046653.15	6	3	4	1	4	0	2	8	4	2	0	5	4	2	3	1	5	2	6	6	3	7	9	6
ENSG00000046774.10	0	0	0	0	0	0	0	0	0	0	0	0	0	0	0	0	0	0	0	0	0	0	0	0
ENSG00000046889.19	8	9	2	4	4	0	2	18	6	9	6	10	7	5	8	12	17	4	8	15	15	11	4	10
ENSG00000047056.16	402	431	577	354	541	0	510	525	467	491	324	559	458	497	543	467	528	451	633	706	543	627	637	682
ENSG00000047188.16	738	765	1009	655	933	0	893	871	805	884	572	907	836	874	975	765	876	848	1151	1154	1006	1069	988	1095
ENSG00000047230.15	976	926	1314	821	1268	0	1123	1145	1100	1175	696	1242	1158	1205	1190	1125	1224	1140	1580	1627	1282	1381	1340	1466
ENSG00000047249.18	493	438	582	350	520	1	546	494	560	543	305	459	504	561	577	531	588	519	763	720	544	834	879	1043
ENSG00000047315.16	1633	1416	2075	1209	1775	0	1722	1674	1683	1791	1117	1761	1660	1726	1996	1611	1866	1641	2359	2247	1919	2665	2624	2879
ENSG00000047346.12	424	428	653	370	522	0	587	538	499	570	360	574	502	535	560	479	491	528	639	647	561	596	604	680
ENSG00000047365.12	241	233	376	166	287	0	266	269	250	251	181	244	235	249	310	260	294	273	356	349	302	468	503	632
ENSG00000047410.14	1523	1432	1927	1292	1847	0	1777	1657	1587	1805	1203	1812	1706	1795	1955	1590	1984	1734	2512	2424	2092	2371	2311	2713
ENSG00000047457.14	2315.6	2077.04	2862.55	1701.64	2572.85	0	2390.74	2379.74	2499.12	2576.58	1696.77	2425.79	2282.81	2459.66	2796.73	2198.81	2331.76	2315.9	3188.64	2890.76	2347.84	2833.68	2627.55	3196.53
ENSG00000047578.13	366	351	494	321	399	0	360	401	383	382	278	437	355	427	439	376	475	393	592	569	475	587	569	588
ENSG00000047579.19	121	85	147	79	113	0	113	106	106	120	60	116	101	115	119	111	129	129	203	177	166	312	293	298
ENSG00000047597.7	15	6	15	6	4	0	6	15	4	11	8	13	11	17	19	15	15	15	24	25	25	43	35	55
ENSG00000047617.15	10	15	9	4	15	0	7	11	6	10	7	13	10	13	12	10	5	13	15	8	6	7	13	13
ENSG00000047621.12	217	239	329	167	302	0	241	222	204	259	199	265	227	258	268	258	304	289	433	405	318	425	452	496
ENSG00000047634.15	462	497	635	472	670.9	0	692	653.88	605	689	433	684	591	567	598	499	584	509	688	783	674	551.88	517	624
ENSG00000047644.18	812	702	958	602	719	0	708	684	713	812	485	766	771	767	868	714	791	741	1011	995	854	1204	1162	1245
ENSG00000047648.23	2	4	10	3	2	0	1	1	2	7	0	4	5	7	7	2	2	3	3	6	1	2	1	6
ENSG00000047662.5	0	0	4	4	4	0	2	1	4	3	1	0	2	2	2	5	1	1	4	4	4	1	2	8
ENSG00000047849.21	4927	4710	6574	3787	5297	0	5353	5161	5211	5184	3640	5903	5194	5792	5832	4990	5633	4948	8088	7582	6063	7360	6976	7521
ENSG00000047932.14	742	681	971	585	980	0	841	883	903	868	562	918	832	984	993	860	918	752	1202	1193	1022	1021	1003	1118
ENSG00000047936.10	9	16	27	12	27	0	27	20	23	16	17	33	14	22	19	14	19	10	20	19	20	8	10	12
ENSG00000048028.11	420	402	458	322	443	0	454	451	426	469	270	433	407	473	431	412	454	446	604	638	523	472	476	505
ENSG00000048052.21	213	169	260	131	139	0	134	108	172	170	91	192	149	204	236	167	200	187	321	278	269	820	928	972
ENSG00000048140.18	700	676	909	551	742	0	652	696	809	736	489	732	668	710	799	718	834	656	1193	1086	847	1199	1061	1163
ENSG00000048162.20	178	192	291	150	208	1	180	204	203	250	133	186	207	211	211	258	272	197	382	381	275	443	426	420
ENSG00000048342.16	102	154	180	112	158	0	158	154	161	143	120	175	146	172	165	163	179	151	188	231	187	189	131	125
ENSG00000048392.11	1455	1351	1809	1175	1670	0	1518	1561	1522	1592	1080	1600	1518	1556	1750	1437	1579	1482	2027	1926	1514	1693	1795	2156
ENSG00000048405.10	298	262	345	204	314	0	312	244	323	287	213	343	259	330	372	269	328	274	438	469	407	552	554	623
ENSG00000048462.11	0	0	0	0	0	0	0	0	0	0	0	0	0	0	0	0	0	0	0	0	0	0	0	0
ENSG00000048471.14	167	163	228	134	237	0	191	216	225	173.83	127	212	199	186	216	188	175	200	308	256	226	327	362	370
ENSG00000048540.15	1	2	1	0	0	0	2	1	0	0	0	0	0	1	0	1	0	0	0	0	1	0	0	0
ENSG00000048544.6	577.61	520	734	438	622	0	557	596	635	621	423	669	613	616	682	602.99	668	585	963.98	938	771.71	1010	1056.98	1187
ENSG00000048545.14	5	0	1	0	5	0	0	0	3	0	1	3	7	0	0	6	0	1	7	3	2	20	44	33.57
ENSG00000048649.13	602.25	573.56	817.55	496	640.3	0	622.22	564.75	608	644	401	627.95	660.2	651	760.75	628.8	679	588	822	864.91	698.12	912	883	967.58
ENSG00000048707.15	1485	1298	1776	1172	1584	0	1465	1416	1485	1464	977	1546	1510	1610	1765	1458	1589	1483	2276	2140	1803	2354	2536	2633
ENSG00000048740.18	237	188	283	161	232	0	250	206	229	234	162	255	231	252	265	226	238	261	321	300	255	494	522	583
ENSG00000048828.17	2242	2295	3137.72	2055	3023	0	2901	3020	2922	2874	1982	3021	2781	2935	3073	2497	2937	2680	4110.96	3853.71	3164	3629	3431	3695
ENSG00000048991.16	574	542	736	449	697	0	651	612	659	633	421	684	630	692	710	610	700	598	876	903	733	709	713	775
ENSG00000049089.15	19	30	26	14	16	0	18	12	16	16	17	22	17	29	25	17	28	33	24	37	15	35	18	28
ENSG00000049130.16	148	145	211	159	238	0	204	218	200	178	149	221	155	190	234	187	216	208	319	278	239	294	240	250
ENSG00000049167.14	92	80	134	62	138	0	98	106	95	114	76	110	79	133	140	126.69	119.65	137	166.81	168	148.11	141.19	156	182
ENSG00000049192.15	84	98	141	85	106	0	77	98	101	114	55	105	96	104	94	89	102	77	137	149	95	34	53	50
ENSG00000049239.12	3307	3396	4590	2799	4002	0	3893	3709	3780	3702	2482	4051	3444	4032	3869	3255	3728	3192	4913	4591	3821	3547	3260	3462
ENSG00000049245.13	959	887	1289	694	1109	0	1097	1057	991	1065	646	1097	1021	1196	1182	921	1135	1049	1477	1414	1135	1473	1429	1517
ENSG00000049246.14	56	70	79	58	62	0	71	95	74	60	55	90	63	75	59	40	53	36	68	74	63	15	19	17
ENSG00000049247.13	2	4	1	2	3	0	0	2	4	3	3	3	3	4	2	1	7	0	2	1	2	1	5	3
ENSG00000049249.8	224	198	318	142	175	0	180	172	174	172	88	188	175	173	240	159	170	159	228	211	136	455	547	549
ENSG00000049283.18	1	0	0	0	1	0	0	0	0	0	0	0	0	0	3	0	0	2	0	0	0	0	0	0
ENSG00000049323.16	254	194	312	166	188	0	192	167	229	242	100	203	229	217	291	251	257	253	343	314	248	927	867	866
ENSG00000049449.9	2306.71	2068.87	3018.79	1729.82	2300.68	0	2118.23	1976.81	2354.39	2432.86	1463.5	2364.95	2349.62	2628.72	2871.09	2612.88	2671.13	2623.84	4118.91	3944.88	3334.72	8444.74	8686.19	9835.59
ENSG00000049540.17	0	0	0	0	0	0	0	0	0	0	2	0	0	0	2	0	0	0	1	2	0	0	1	1
ENSG00000049541.11	185	156	228	144	250	0	211	204	198	204	134	200	190	174	214	210	216	174	288	275	212	364	397	403
ENSG00000049618.23	907	854	1199	754	989	0	876	909	917	949	656	1014	942	1067	1115	946	1093	856	1426	1322	1213	1463	1450	1454
ENSG00000049656.14	1467	1266	1856	1083	1668	0	1344	1410	1529	1497	1028	1622	1411	1554	1720	1449	1594	1489	2135	2070	1687	2489	2265	2637
ENSG00000049759.18	2122	2104	2826	1705	2508	0	2358	2246	2349	2370	1513	2436	2327	2543	2649	2385	2585	2283	3673	3495	2696	3364	3181	3558
ENSG00000049768.15	7	4	2	7	3	0	3	2	5	2	1	1.38	1	3	0	2	2	2	3	1	1	1	5	5
ENSG00000049769.14	102	93	127	90	108	0	145	142	106	117	84	137	85	130	110	104	124	84	152	138	139	120	127	132
ENSG00000049860.14	1218	1164	1577	888	1399	0	1354	1321	1263	1422	887	1417	1326	1377	1508	1329	1417	1353	2048	2097	1683	2637	2578	2903
ENSG00000049883.15	137	174	205	129	210	0	212	211	165	188	142	176	188	226	186	189	186	188	232	264	204	223	182	186
ENSG00000050030.15	8	8	8	10	8	0	9	9	14	5	8	4	7	12	7	12	6	10	10	16	12	21	19	21
ENSG00000050130.18	410	434	563	365	536	0	489	461	412	468	338	481	486	513	584	538	548	485	687	637	565	718	691	859
ENSG00000050165.18	94	106	151	60	121	0	100	79	96	121	70	87	84	84	108	105	87	79	106	108	58	116	132	170
ENSG00000050327.15	1067.87	895.4	1346.2	846.9	978.32	0	1035.76	990.27	1023.09	1155.87	702.03	1210.05	1105.45	1069.52	1255.98	1044.42	1174.04	1125.18	1604.91	1615.25	1432.88	2378	2295.82	2535.88
ENSG00000050344.9	233	175	248	142	180	0	179	190	187	195	135	172	169	185	209	176	199	180	280	283	249	437	396	492
ENSG00000050393.11	306	266	447	231	339	0	355	356	390	389	222	369	368	353	381	342	399	363	565	564	414	732	724	819
ENSG00000050405.13	1200	1063	1534	894	1279	0	1130	1054	1165	1269	777	1262	1204	1286	1401	1141	1303	1157	1726	1611	1448	2497	2570	2931
ENSG00000050426.16	433	433	590	377	603	0	523	529	499	498	354	568	460	515	547	510	598	539	782	770	679	599	619	675
ENSG00000050438.17	3	2	4	0	5	0	2	5	2	2	0	1	2	2	0	1	6	0	3	5	4	3	7	5
ENSG00000050555.18	0	0	0	3	1	0	0	0	0	4	0	0	0	0	1	0	0	1	0	2	0	4	7	3
ENSG00000050628.20	3	3	1	2	1	0	0	1	4	3	0	4	2	1	3	2	0	3	3	3	0	3	3	2
ENSG00000050730.16	1	0	1	1	0	0	2	1	0	0	0	0	2	0	0	0	0	0	1	0	0	3	4	3
ENSG00000050748.17	659	583	941	536	819	0	782	790	825	776	518	951	792	794	921	784	850	778	1086	1070	892	978	850	964
ENSG00000050767.17	0	3	3	0	1	0	2	3	0	2	1	6	1	3	1	5	0	2	2	3	7	0	1	1
ENSG00000050820.17	2332	2012	2945.22	1587	1871	0	1709	1842	2072	2196	1340	2209	2083	2346.41	2506.59	1959	2412	1984	3593.37	3212	2502.3	5480	5206	5316.95
ENSG00000051009.10	577	587	761	450	740	0	661	697	690	646	440	774	653	726	693	705	734	659	950	960	835	930	854	935
ENSG00000051108.15	2158	2113	2811	1711	2524	0	2370	2342	2459	2319	1572	2656	2215	2475	2709	2265	2601	2282	2994	2969	2450	2735	2873	3618
ENSG00000051128.19	210	200	283.83	146	194	0	149.75	164.19	180	189	92	193.52	181	214	212	199	260	203	373	344.68	268.79	658	642	649
ENSG00000051180.17	21	9	22	20	15	0	10	15	25	15	8	16	14	15	23	21	18	20	22	35	23	24	20	22
ENSG00000051341.14	36	18	33	18	25	0	26	17	27	26	11	20	39	24	23	20	34	35	24	27	18	19	22	20
ENSG00000051382.8	611	541	732	526	684	0	654	677	661	717	416	707	645	742	833	697	718	677	868	903	724	1084	1131	1216
ENSG00000051523.11	1286	1340	2022	1103	1485	0	1304	1410	1554	1498	975	1590	1299	1543	1567	1322	1815	1467	2422	2213	1555	2686	2454	2546
ENSG00000051596.9	376.83	402.26	527.02	297.64	384.55	0	365.96	363.65	396.06	450.48	236.03	448	377.26	432.31	406.61	387.72	450.31	318.85	569.27	499.33	429.41	710.65	720.95	803.15
ENSG00000051620.11	833	756	1035	638	839	0	795	894	836	939	561	897	745	954	976	854	942	895	1361	1200	952	1547	1438	1479
ENSG00000051825.15	237	252	313	219	282	0	286	313	272	296	179	304	302	284.57	304	274.27	319.38	255.26	355.99	396	355.2	260	291.22	289
ENSG00000052126.14	658	628	904	636	783	0	767	765	797	847	461	809	795	901	781	790	851	758	1062	1121	888	847	824	886
ENSG00000052344.16	892	967	1292	771	1028	0	1134	1150	1034	1015	673	1254	1088	1150	1116	1023	1175	1090	1702	1695	1164	1616	1605	1697
ENSG00000052723.11	588	594	823	504	786	0	690	694	671	681	433	691	695	698	775	675	729	640	947	976	844	978	933	1125
ENSG00000052749.13	457	357	527	289	404	0	364	386	400	413	260	435	439	450	480	422	482	466	828	774	636	1367	1517	1754
ENSG00000052795.13	776	723	1019	656	1078	0	917	865	941	921	565	953	901	924	1059	896	955	858	1381	1268	1107	2023	2039	2235
ENSG00000052802.13	6801	7303	9407	6521	11580	0	11660	11211	9252	9556	6558	11421	8783	9452	9657	7290	7985	7281	8038	8214	6795	5766	5033	5139
ENSG00000052841.15	1143	1031	1492	806	1255	0	1223	1280	1175	1209	834	1307	1251	1315	1436	1235	1427	1197	1974	2060	1718	2571	2727	3169
ENSG00000052850.8	0	0	0	1	1	0	0	1	0	1	0	1	0	0	0	0	0	0	0	0	0	2	1	5
ENSG00000053108.17	1	2	4	4	5	0	4	12	5	5	1	9	2	3	3	1	0	1	6	6	6	8	8	5
ENSG00000053254.15	1155	1208	1563	974	1461	0	1385	1360	1410	1337	914	1477	1350	1531	1522	1298	1455	1343	1873	1787	1581	1510	1590	1833
ENSG00000053328.8	15	8	14	7	15	0	13	5	12	14	11	10	6	12	19	17	9	2	22	15	8	20	14	12
ENSG00000053371.12	414	463	589.91	346	520	0	478	480	469.95	421.95	302	538	434.89	447	554	448	572	467	697.99	654	550.99	554	504	563
ENSG00000053372.5	295	258	402	238	273	0	284	268	303	327	167	329	296	334	354	340	397	358	558	531	417	766	622	686
ENSG00000053438.11	0	0	0	0	0	0	0	0	0	0	0	0	0	0	0	0	0	0	0	1	0	0	0	0
ENSG00000053501.13	161	123	149	95	169	0	127	138	133	167	107	172	129	157	175	123	179	145	244	231	158	225	180	224
ENSG00000053524.12	9	6	12	1	3	0	22	8	4	17	9	11	5	8	12	9	10	18	26	20	22	42	23	32
ENSG00000053702.15	0	0	0	0	0	0	0	0	0	0	0	0	0	0	1	0	0	0	1	1	0	0	0	0
ENSG00000053747.16	860	732	1023	625	805	0	769	714	841	814	528	840	868	946	964	890	1018	816	1436	1373	1173	1861	1886	1892
ENSG00000053770.12	490	476	675	427	612	0	611	537	604	571	377	601	561	634	665	547	608	601	841	743	643	712	681	763
ENSG00000053900.10	525	522	750	452	706	0	777	728	689	687	446	741	674	713	661	638	764	691	919	987	822	739	586	700
ENSG00000053918.17	52	54	79	47	100	0	101	105	71	88	54	99	74	64	54	82	85	75	104	102	64	35	39	31
ENSG00000054116.12	830	770	1044	600	933	0	841	834	863	921	526	976	820	889	995	853	1004	854	1329	1213	995	1385	1360	1559
ENSG00000054118.15	2080	1948	2753	1678	2263	0	2226	2128	2318	2334	1572	2318	2287	2510	2603	2278	2583	2177	3261	3302	2621	2184	2019	2447
ENSG00000054148.17	895	934.98	1310.83	713	1112	0	1041	1007	1111	1041	694	1148.59	982	943	1019.57	949	1156	904.68	1343	1239	985	1175	1031	1315
ENSG00000054179.12	16	10	27	13	37	0	23	34	21	17	18	33	16	25	18	19	21	11	33	31	27	11	6	10
ENSG00000054219.11	14	19	13	8	8	0	12	19.26	27	20	11	21	11	17	18	17	6.91	12	29	32	26	21	28.81	29
ENSG00000054267.22	474.81	488.16	652.75	453.7	541	0	505.5	494.4	528.04	527.12	286	546	483.23	599	576.86	508	550.51	487.29	661	748.93	605	632	687	819.6
ENSG00000054277.14	1730.2	1416.79	2013.46	1167.51	1686.06	0	1404.98	1378.22	1652.33	1690.18	1036.23	1686.1	1521.85	1598.35	1803.52	1461.15	1557.45	1569.26	2156.86	1918.94	1607.63	1847.1	1640.86	1872.44
ENSG00000054282.16	156	156	223	131	191	0	180	181	196	173	101	208	197	205	230	185	200	175	279	276	218	234	281	287
ENSG00000054356.14	5	5	5	6	1	0	6	11	11	4	5	10	13	3	5	6	4	6	7	4	3	250	287	216
ENSG00000054392.13	175	151	187	118	193	0	167	164	166	176	82	182	167	185	201	164	166	162	260	234	220	290	239	273
ENSG00000054523.17	1440.11	1195	1775.75	1047	1621	0	1453.61	1444	1431	1496	1013	1623	1510.75	1711.83	1787	1525	1603	1487.52	2371	2228	1855	2091	2187	2331.27
ENSG00000054598.9	1	4	2	1	1	0	4	0	0	0	0	0	1	1	4	2	2	1	2	2	1	23	15	29
ENSG00000054611.14	462	435	541	356	518	0	520	467	482	485	320	603	471	581	524	462	565	449	717	694	549	742	658	722
ENSG00000054654.16	650	726	910	617	934	0	985	952	881	882	525	936	812	808	862	717	765	634	879	877	759	431	453	478
ENSG00000054690.14	843	841	1143	667	945	0	883	883	979	893	559	951	927	976	899	865	1057	939	1397	1783	1386	1666	1435	1669
ENSG00000054793.14	1384	1371	1842	1105	1657	0	1517	1398	1621	1498	988	1556	1471	1620	1839	1342	1497	1484	2251	2074	1800	2507	2523	2544
ENSG00000054796.13	0	0	0	0	1	0	0	0	0	0	0	0	0	0	0	0	0	0	0	0	0	0	0	0
ENSG00000054803.4	0	1	0	0	0	0	0	0	0	0	0	0	0	0	0	0	0	0	0	0	0	0	0	0
ENSG00000054938.15	2	0	0	1	2	0	4	1	0	1	0	3	2	1	2	0	3	1	4	1	5	9	12	14
ENSG00000054965.10	760	757	1041	651	910	0	919	889	917	939	588	838	815	907	958	739	895	777	1137	1013	888	906	876	1005
ENSG00000054967.13	44	18	36	21	17	0	19	19	32	36	13	21	33	21	33	29	35	19	51	50	53	131	107	128
ENSG00000054983.17	688	571	806	498	770	0	680	692	726	713	418	718	677	674	790	658	705	690	857	844	705	931	984	1061
ENSG00000055044.11	315	296	444	247	409	0	332	335	318	396	237	387	377	396	419	403	417	393	584	602	470	679	634	751
ENSG00000055070.17	2136	2062	2782	1639	2341	0	2263	2286	2382	2311	1555	2552	2276	2457	2622	2097	2433	2122	3331	2997	2389	3438	3282	3641
ENSG00000055118.15	6	5	12	5	6	0	9	5	12	6	3	8	10	5	6	6	9	7	33	17	6	232	202	236
ENSG00000055130.17	777	761	1107	652	1036	0	935	915	971	972	611	962	897	1047	1136	926	1120	920	1331	1325	1113	1534	1303	1653
ENSG00000055147.19	302	292	340	250	381	0	346	363	323	363	221	365	330	350	416	349	340	319	473	396	377	438	482	525
ENSG00000055163.20	1088	1021	1391	873	1232	0	1185	1247	1131	1137	723	1297	1149	1235	1246	1097	1222	1014	1537	1476	1232	1202	1082	1232
ENSG00000055208.19	851	770	1055	700	1044	0	923	944	934	984	639	1044	881	961	1037	895	960	957	1243	1215	1076	1321	1392	1627
ENSG00000055211.14	499	420	646	417	642	0	525	533	488	569	354	521	507	578	608	539	592	537	827	767	691	782	764	853
ENSG00000055332.18	989	924	1264	795	1311	0	1108	1178	1092	1173	681	1160	1207	1216	1318	1109	1242	1170	1597	1664	1413	1409	1364	1546
ENSG00000055483.19	574	547	787	456	640	0	602	555	649	666	404	630	651	663	738	661	722	633	1062	1050	841	1298	1500	1575
ENSG00000055609.18	1482	1232	1797	1134	1615	0	1539	1492.99	1499	1518	1017	1522	1473	1625	1754	1361	1483	1422	2094	2051	1684	1899	2169	2280
ENSG00000055732.13	0	4	2	1	3	0	3	1	4	4	1	3	5	2	2	4	6	2	6	0	6	10	13	20
ENSG00000055813.6	3	5	1.87	2	1	0	0	5	0	6	0	4.08	3	3	0	4	7	3	10	0	0	49.21	59	27.46
ENSG00000055917.15	1347	1364	1859	1172	1721	0	1554	1603	1573	1560	1012	1627	1503	1699	1867	1488	1683	1563	2200	2198	1919	2088	1939	2295
ENSG00000055950.16	528	523	746	412	641	0	591	571	616	582	385	652	522	587	626	587	605	582	819	831	628	710	692	721
ENSG00000055955.17	2858.99	3077.43	4155.71	2396	3814.5	0	4115.29	3915.37	3688.24	3541.11	2549.13	4136.32	3341.44	3663.01	3568.15	3198.35	3524.33	3231.37	4693.19	4523.69	3579.57	4315.08	3974.13	4339.71
ENSG00000055957.11	8495	9125	11421	7710	12073	3	11607	11664	10611	10702	7372	12585	9580	10467	10373	8060	9358	8026	10098	9797	7866	5432	4726	5200
ENSG00000056050.7	190	153	200	142	191	0	153	174	190	174	116	186	170	189	212	183	190	198	252	243	194	201	213	226
ENSG00000056097.16	1471	1420	1951	1181	1684	0	1496	1504	1598	1616	1022	1696	1563	1638	1848	1486	1782	1483	2374	2293	1966	2255	2267	2461
ENSG00000056277.16	172	124	203	107	194	0	161	137	133	156	76	151	186	157	182	166	168	178	244	265	232	234	196	234
ENSG00000056291.17	11	18	19	10	20	0	7	10	14	11	3	6	9	8	5	6	4	19	13	22	11	46	46	49
ENSG00000056487.16	0	0	1	5	0	0	3	2	0	2	0	2	2	0	7	1	5	1	2	5	2	1	3	5
ENSG00000056558.11	125	108	128	89	126	0	124	121	127	111	86	122	105	117	136	129	136	123	130	155	133	212	206	226
ENSG00000056586.16	1448	1405	1934	1127	1651	0	1511	1547	1553	1610	1058	1597	1582	1727	1757	1486	1689	1443	2080	2036	1761	1941	2068	2275
ENSG00000056736.10	220	230	272	215	312	0	272	239	240	309	200	282	221	257	244	190	237	228	229	235	181	74	84	127
ENSG00000056972.20	185	207	294	189	303	0	253	273	233	277	191	290	241	269	332	229	302	255	433	343	306	372	324	415
ENSG00000056998.20	988	1014	1217	833	1393	0	1249	1159	1205	1155	720	1285	1142	1174	1264	1167	1252	1060	1593	1473	1269	785	657	764
ENSG00000057019.16	649	548	830	517	722	0	702	629	692	717	418	709	699	703	810	593	701	639	956	916	781	1215	1294	1325
ENSG00000057149.16	0	0	0	0	0	0	0	0	0	0	0	0	0	0	0	0	0	0	0	0	0	0	0	0
ENSG00000057252.13	328	324	486	298	413	0	385	411	458	374	234	418	379	449	477	371	399	353	573	509	436	615	586	621
ENSG00000057294.14	1100.85	1078.97	1447.91	1016.89	1311.96	0	1213.92	1270.82	1355.94	1259.97	857.97	1338.91	1285.96	1292.9	1445.9	1122.87	1317.83	1231.94	1588.8	1402.95	1290.98	1254.95	1136.97	1235
ENSG00000057468.7	6	3	9	7	5	0	2	5	10	5	2	4	4	4	7	4	5	1	16	8	5	4	5	5
ENSG00000057593.13	448	593	761	418	707	0	671	678	637	643	453	766	676	730	650	611	764	579	827	888	634	337	271	308
ENSG00000057608.17	3655.41	3597.87	4865.28	3077.88	4702.85	0	4401.87	4434.86	4341.71	4525.38	2890.77	4738.52	4445.9	4515.09	4869.48	4391.73	4813.76	4437.78	6302.95	5870.48	4880.78	5881.34	5731.55	6717.39
ENSG00000057657.17	5	0	3	2	1	0	2	2	2	5	1	1	3	4	6	2	1	3	2	2	3	1	6	0
ENSG00000057663.16	444	356	521	316	509	0	458	420	459	470	255	530	438	446	509	416	495	416	667	640	525	812	794	957
ENSG00000057704.13	15	11	23	7	15	0	24	9	15	11	8	17	18	32	12	18	17	26	32	26	24	45	71	70
ENSG00000057757.10	505	519	660	429	515	0	550	514	530	592	375	552	519	581	611	553	647	598	844	833	642	707	699	838
ENSG00000057935.13	480	445	662	394	652	0	537	587	508	572	340	629	529	565	641	537	548	522	813	747	630	661	587	615
ENSG00000058056.9	192	150	262	165	218	0	213	189	209	213	135	204	220	222	214	205	209	172	322	311	255	247	279	231
ENSG00000058063.16	868	919	1271	806	1063	0	982	1061	948	1004	660	1102	1029	1160	1251	1049	1129	1041	1416	1373	1212	1302	1330	1454
ENSG00000058085.15	226	171	254	116	176	0	147	125	174	206	79	181	175	172	202	156	158	181	299	235	222	1441	1563	1379
ENSG00000058091.17	295	224	339	218	272	0	251	253	259	258	162	276	263	293	297	248	277	269	350	342	274	320	283	348
ENSG00000058262.10	4341	4114	5832	3559	5084	0	4525	4742	4987	5209	3185	5241	4734	5246	5409	4670	5313	4447	7147	6946	5736	12382	12796	14434
ENSG00000058272.19	735	718	898	545	836	0	751	711	769	798	502	898	800	831	939	736	843	826	1142	1165	970	985	1071	1229
ENSG00000058335.15	2	0	2	0	1	0	1	1	3	3	0	3	2	2	2	0	6	0	1	0	6	6	2	8
ENSG00000058404.20	6	5	5	7	13	0	2	4	8	4	7	6	6	7	5	6	3	6	10	10	2	10	2	3
ENSG00000058453.17	305.82	279.23	395.37	226.73	282.49	0	283.13	273.69	319.07	324	206.26	339.37	295.42	339.4	273.78	263.58	356.47	289.27	503.18	513.91	356.57	338.21	286	329.06
ENSG00000058600.16	567	542	783	499	661	0	623	555	651	630	409	664	627	645	651	606	767	646	981	967	764	1014	993	1147
ENSG00000058668.14	1408	1333	1891	1180	1747	0	1619	1613	1551	1569	1041	1635	1525	1582	1719	1395	1522	1388	2036	1983	1620	2525	2601	2648
ENSG00000058673.16	1883.4	1557.78	2294.05	1459.86	2167.44	0	1855.06	1816.62	1712.1	1898.53	1220.35	2079.58	1886.43	1945.34	1987.97	1773.96	2252.11	1967.61	2664.57	2469.21	2233.86	2167.14	2162.76	2737.97
ENSG00000058729.11	333	323	415	280	382	0	388	327	368	363	253	400	369	401	419	346	393	374	513	538	441	529	492	586
ENSG00000058799.15	434	440	596	407	612	0	541	531	524	530	378	590	501	567	559	522	650	575	805	724	555	574	551	652
ENSG00000058804.12	212	173	268	143	264	0	226	229	245	265	162	229	247	268	318	224	256	213	375	353	296	471	447	531
ENSG00000058866.15	10	14	28	8	18	0	10	10	8	12	8	11	18	13	23	12	13	19	38	27	19	91	85	94
ENSG00000059122.16	545	511	720	412	556	0	472	516	564	610	323	604	527	611	609	529	653	533	1007	986	796	1258	1185	1415
ENSG00000059145.18	323	283	428	253	332	0	296	302	342	378	221	382	325	401	395	378	445	393	690	867	526	501	447	506
ENSG00000059377.17	13	14	16	11	29	0	17	20	26	19	16	17	20	16	19	24	25	13	22	27	7	8	15	23
ENSG00000059378.12	321	346	470	224	341	0	333	306	365	323	233	387	305	338	390	296	335	334	439	451	330	494	467	485
ENSG00000059573.9	1437	1403	1837	1151	1805	0	1593	1680	1627	1664	987	1734	1606	1693	1852	1509	1642	1548	2067	2074	1818	2141	2146	2468
ENSG00000059588.10	387	407	546	361	515	0	513	572	479	452	314	558	525	468	447	475	526	479	728	850	657	567	513	683
ENSG00000059691.12	236	265	313	164	258	0	299	300	284	266	170	339	262	297	307	276	259	274	443	336	298	371	360	369
ENSG00000059728.11	378	322	477	236	399	0	354	354	406	381	293	444	388	373	392	332	381	358	474	447	453	831	873	976
ENSG00000059758.8	303	256	396	208	294	0	261	244	319	295	196	312	265	342	329	258	320	262	402	378	325	516	451	598
ENSG00000059769.20	234.33	222.59	301.67	205.86	309.2	0	284.71	286.09	307.77	323.98	214.65	340.27	306.8	311.6	316.08	325.79	340.56	287.44	447.1	462	335.34	633.75	615.71	745.35
ENSG00000059804.16	30.4	34.53	38	28.65	44.26	0	35.85	53.08	46.69	38.09	31.07	49.95	54.94	37.52	48.67	42.88	45.26	33.82	52.27	56.01	38.27	16	16.98	19.51
ENSG00000059915.17	24	16	32	13	29	0	23	19	26	31	17	34	18	30	37	17	27	14	31	40	31	35	23	24
ENSG00000060069.16	532	507	729	387	557	0	462	487	534	474	347	555	532	548	564	486	588	493	763	732	543	878	900	934
ENSG00000060138.13	1643.85	1461	2095	1160.99	1636	0	1523	1517	1649	1668	980	1586	1552	1638	1708.99	1587	1845	1604	2715	2411	2058	3452	3320	3614
ENSG00000060140.9	0	0	4	0	1	0	1	3	4	1	6	1	1	2	1	2	1	1	2	2	2	7	4	3
ENSG00000060237.17	5756	5770	7677	5150	7179	0	6998	6502	7111	6790	4660	7132	6954	7540	7821	6587	7401	6596	10112	9369	7890	8272	8488	9152
ENSG00000060303.5	0	0	1	0	0	0	0	0	0	0	0	0	0	0	0	0	0	0	0	0	0	0	1	0
ENSG00000060339.14	898	921	1328	827	1213	0	1124	1074	1060	1131	710	1108	1133	1280	1278	1106	1221	1119	1660	1726	1471	1553	1415	1717
ENSG00000060491.16	1133	1153	1531	896	1252	0	1180	1190	1148	1193	807	1444	1249	1286	1243	1150	1397	1093	1884	1758	1332	1789	1591	1783
ENSG00000060558.4	0	0	1	5	0	0	0	1	1	0	0	0	0	1	1	0	1	1	0	1	0	0	0	0
ENSG00000060566.14	956	893	1171	831	1266	0	1137	1077	1137	1014	793	1127	1115	1243	1238	1230	1381	1137	1882	1973	1488	756	590	733
ENSG00000060642.10	203	212	274	195	273	0	275	220	236	237	163	270	214	249	268	230	232	240	338	307	243	247	216	297
ENSG00000060656.20	1400	1417	1900	1236	1827	0	1736	1765	1681	1694	1116	1917	1741	1778	1804	1626	1910	1593	2413	2323	1819	1888	1796	1823
ENSG00000060688.13	317	258	357	221	344	0	259	347	302	306	226	345	305	335	325	306	365	309	487	456	375	412	386	459
ENSG00000060709.15	1	0	0	0	0	0	0	0	0	0	0	1	0	0	0	0	1	0	0	0	0	0	0	0
ENSG00000060718.22	5	5	5	6	10	0	4	7	13	5	0	3	1	10	3	0	3	9	10	5	1	3	4	1
ENSG00000060749.15	848	730	988	708	922	0	939	931	859	937	611	877	940	935	1016	877	943	877	1325	1271	1065	1342	1400	1466
ENSG00000060762.19	505	527	718	415	647	0	610	595	646	613	382	669	561	601	703	576	648	602	844	770	643	1100	1178	1503
ENSG00000060971.18	3644	4016	5184	3524	5515	0	5226	5374	5040	4878	3319	5571	4769	4914	4905	4460	4992	4240	5935	5827	4756	2821	2421	2812
ENSG00000060982.15	1632	1761	2360	1440	2281	0	2191	2066	1982	1996	1409	2184	2180	2263	2398	2304	2501	2142	3494	3346	2652	3934	4314	4827
ENSG00000061273.18	1456	1297	1847	1012	1183	0	1102	1129	1253	1386	836	1408	1316	1303	1379	1141	1406	1175	1976	1979	1568	2619	2499	2725
ENSG00000061337.15	3	10	16	6	10	0	7	8	5	9	4	8	17	6	11	2	9	9	10	11	11	10	16	9
ENSG00000061455.11	20	17	27	13	18	0	12	18	11	32	7	28	21	24	16	16	26	22	19	18	18	12	23	23
ENSG00000061492.12	1	5	0	0	0	0	0	1	0	0	0	0	0	3	0	0	0	0	0	0	1	0	0	1
ENSG00000061656.10	12	15	19	21	20	0	16	24	11	10	14	24	23	17	12	17	19	17	26	20	18	27	20	32
ENSG00000061676.15	2467	2324	3380	2080	3084	0	2803	2750	2746	2989	1837	2861	2880	2983	3249	2707	3192	2850	4246	4020	3373	4819	4858	5305
ENSG00000061794.13	897	870	1105	719	1142	0	1109	1014	976	1025	668	1172	1048	1100	1154	1069	1139	1070	1544	1469	1252	1599	1582	1673
ENSG00000061918.13	2	10	1	2	1	0	5	3	5	3	1	4	0	2	4	5	7	6	9	5	3	4	2	11
ENSG00000061936.9	566	585	762	515	670	0	589	625	644	719	450	714	657	645	678	609	695	605	932	987	740	822	828	893
ENSG00000061938.19	604	548	815	452	577	0	551	606	567	583	408	658	584	668	587	545	689	566	856	869	745	908	776	851
ENSG00000061987.16	886	895	1069	744	1162	0	1034	1089	1084.72	1060	631	1089	1011	1040	1176	998	1047	981	1411	1400	1217	1523	1682	1944
ENSG00000062038.14	10	11	10	8	7	0	13	8	14	11	5	14	9	15	3	3	8	16	18	23	5	13	7	6
ENSG00000062096.15	0	0	0	0	0	0	0	0	0	0	0	0	0	0	0	0	0	0	0	0	0	0	1	0
ENSG00000062194.16	1091	954	1347	888	1289	0	1285	1214	1156	1199	792	1215	1130	1183	1234	1123	1326	1217	1710	1830	1464	2108	2233	2447
ENSG00000062282.15	916	1079	1378	982	1677	0	1648	1682	1310	1287	925	1687	1203	1335	1395	1082	1301	1070	1194	1161	918	517	478	517
ENSG00000062370.16	98	98	126	69	132	0	112	122	98	129	83	114	99	107	98	102	98	135	132	106	123	121	89	123.71
ENSG00000062485.19	1698.93	1642.13	2347.34	1345	1954.15	0	1839.61	1769.65	1758.08	1950.42	1274.56	2013.13	1967	1915.5	2060.57	1748.72	2011.66	1725.84	2530.07	2583.45	2132.11	2225.77	1971.55	2218.54
ENSG00000062524.16	7	4	8	7	4	0	10	4	3	8	5	6	12	12	10	7	10	7	11	17	6	82	105	88
ENSG00000062582.14	562	604.94	787.12	461.02	690	0	624	690.93	692.39	659	440.98	757.99	577	671.86	612	613.12	685.73	568	929.2	852.86	636.81	790.05	680	844.08
ENSG00000062598.18	462	464	618	401	600	0	530	419	527	524	344	572	533	601	596	499	540	533	747	857	630	716	695	768
ENSG00000062650.19	993	911	1224	804	1125	0	993	1037	1094	1042	714	1157	1031	1175	1252	1035	1239	1064	1534	1443	1314	1809	1830	2030
ENSG00000062716.13	2342	2238	3005	1770	2505	0	2492	2329	2395	2381	1517	2570	2576	2704	2626	2630	2921	2503	3456	3600	2885	4124	3981	4733
ENSG00000062725.10	585	596	760	520	684	0	638	617	593	721	398	655	660	689	749	663	653	666	924	856	776	924	876	998
ENSG00000062822.14	206	173	258	155	157	0	196	187	217	239	127.81	194	195	191	201	172	235	175	303	298	234	401	341	384
ENSG00000063015.20	2	0	1	0	0	0	0	0	0	0	1	1	2	0	0	0	0	1	0	0	0	0	0	0
ENSG00000063046.17	3903.2	3848.19	5432.82	3168.8	4804.26	0	4465.03	4238.98	4388.85	4398.1	2880.3	4766.19	4352.29	4719.01	5076.13	4453.68	4833.39	4268.9	6457.73	6373.75	4932.61	6624.52	6809.55	7447.42
ENSG00000063127.16	42	34	60	40	34	0	53	50	29	26	22	43	42	47	38	30	39	40	60	67	63	52	31	40
ENSG00000063169.10	416	370	478	325	393	0	381	384	418	352	256	443	351	446	392	369	458	361	636	668	528	610	596	590
ENSG00000063176.16	897	862	1225	721	980	0	953	1029	969	994	718	1112	948	1173	1082	936	1101	927	1533	1612	1267	1180	927	1109
ENSG00000063177.13	2866	2904	4108	2307	3300	0	2928	3171	3244	3131	1980	3459	2871	3296	3372	3015	3566	2953	4903	4524	3454	6268	5753	6462
ENSG00000063180.9	5	3	4	9	6	0	1	8	5	4	4	2	4	5	5	3	4	3	11	6	11	4	4	12
ENSG00000063241.8	593	622	878	529	768	0	737	729	774	738	473	777	685	709	699	585	705	611	868	806	602	792	802	855
ENSG00000063244.12	1578	1471	2033	1197	1570	0	1541	1502	1695	1677	1183	1709	1563	1786	1666	1497	1692	1466	2496	2485	1908	2666	2398	2729
ENSG00000063245.14	1984	2031	2726	1638	2176	0	2212	2126	2215	2220	1563	2620	2046	2465	2346	1938	2332	1974	3407	3140	2401	3759	3454	3804
ENSG00000063322.15	607	583	802	476	757	0	667	693	695	660	399	700	669	711	747	575	729	598	986	888	743	1190	1199	1299
ENSG00000063438.17	2	1.51	0	1.54	14.35	0	2.85	2.72	6.44	1.48	3.98	1.31	0	7.64	2	10.25	0	2.96	0	7.44	8.5	1.31	0	3.3
ENSG00000063515.2	0	0	0	1	0	0	0	0	0	0	0	0	0	0	0	0	0	0	0	0	0	0	0	0
ENSG00000063587.14	298	280	405	250	365	0	359	340	345	327	235	384	370	358	374	325	382	314	437	449	379	395	404	562
ENSG00000063601.17	502	474	703	384	545	0	536	576	568	578	338	564	546	583	622	513	583	556	822	753	676	890	927	962
ENSG00000063660.9	814	857	1100	548	782	0	707	756	804	800	543	973	721	866	849	758	912	740	1470	1215	963	2226	1994	2149
ENSG00000063761.16	101	113	168	91	137	0	125	126	139	128	77	142	143	130	129	127	140	128	159	194	156	180	180	182
ENSG00000063854.13	575	548	737	451	670	0	661	601	614	675	407	734	594	685	666	587	634	538	780	750	624	686	688	779
ENSG00000063978.16	743.75	684	999	530	772	0	679	684	754	750	459	864	752	763	926	708	842	745	1130	1117	981	1401	1364.64	1587
ENSG00000064012.21	343	321	485	298	400	0	377	349	411	391	254	407	384	406	448	376	422	416	685	585	525	718	690	688
ENSG00000064042.18	25	33	31	20	18	0	24	16	21	25	16	24	25	18	43	27	22	42	50	42	27	167	151	188
ENSG00000064102.15	170	188	226	150	192	0	194	207	200	226	134	206	237	224	229	195	251	204	299	304	242	289	289	304
ENSG00000064115.11	1205	1139	1527	996	1558	0	1373	1385	1317	1369	968	1447	1337	1425	1463	1368	1412	1228	1843	1796	1577	1516	1427	1552
ENSG00000064195.7	1	0	1	0	0	0	0	0	0	0	1	0	0	1	1	0	0	0	0	3	0	4	0	0
ENSG00000064199.6	27	10	33	26	18	0	27	13	18	13	14	21	35	19	13	29	25	28	31	35	21	48	25	44
ENSG00000064201.15	0	0	0	0	0	0	1	0	0	0	0	0	0	1	0	0	0	0	0	0	0	0	0	1
ENSG00000064205.10	0	0	0	0	0	0	0	0	0	0	0	0	0	0	0	0	0	1	0	0	0	0	0	0
ENSG00000064218.5	0	1	0	0	0	0	0	0	0	0	0	0	0	0	0	0	0	0	0	0	0	0	0	0
ENSG00000064225.12	63	68	97	44	61	0	46	50	80	61	42	53	58	91	79	57	75	62	94	101	92	172	172	220
ENSG00000064270.12	18	14	21	7	9	0	7	14	11	20	12	21	14	18	19	19	22	12	35	48	35	232	254	297
ENSG00000064300.9	2	0	3	1	2	0	0	0	0	2	2	1	0	0	0	0	0	0	3	1	1	6	6	2
ENSG00000064309.14	214	193	261	170	231	0	193	192	225	224	140	266	243	214	281	217	255	237	342	333	303	314	309	342
ENSG00000064313.12	439	438	618	382	508	0	483	432	493	544	297	472	477	544	556	434	504	525	670	705	546	654	732	793
ENSG00000064393.16	2394	2151	3125	2049	2688	0	2556	2548	2584	2547	1637	2556	2443	2677	2993	2250	2563	2274	3350	3249	2739	3587	3656	3960
ENSG00000064419.13	869	725	1015	621	856	0	826	836	767	888	561	830	879	915	988	846	915	847	1329	1185	1037	1608	1603	1781
ENSG00000064489.23	102.54	70.18	54.79	3.11	46.42	0	41.67	20.01	76.01	0	59.5	104.13	90.67	84.75	3.05	53.48	125.02	1.39	87.14	141.34	63.07	43.84	66	77.29
ENSG00000064490.14	167	178	247	152	228	0	176	214	217	195	112	230	179	214	232	202	237	217	330	330	261	321	333	379
ENSG00000064545.15	432	447	595	326	496	0	469	470	451	500	351	573	457	483	500	399	575	426	780	734	540	558	445	571
ENSG00000064547.14	298	315	445	275	381	0	286	302	320	305	213	311	339	355	329	316	419	387	612	581	473	514	479	489
ENSG00000064601.18	6514	6703	8762	5700	8212	0	8062	7850	7882	7747	5200	8751	7407	7967	8112	6785	8147	6943	10166	10058	8107	9756	8684	9923
ENSG00000064607.17	1421	1404	1872	1180	1646	0	1437	1413	1519	1563	1045	1583	1542	1569	1631	1446	1723	1530	2355	2710	2175	1906	1817	1969
ENSG00000064651.14	766	529	942	488	560	0	477	450	646	670	368	580	566	630	785	525	612	594	796	757	678	647	680	673
ENSG00000064652.11	219	234	359	188	293	0	253	297	267	311	186	277	249	279	275	274	308	255	333	401	291	502	494	572
ENSG00000064655.19	1	0	0	0	0	0	0	0	0	0	0	0	0	1	0	0	0	0	0	0	0	0	2	0
ENSG00000064666.15	3287	2885	4221	2139	2889	0	2772	2676	3129	2970	1835	3095	2867	3081	3375	2794	3321	2890	4789	4081	3298	6552	5956	6821
ENSG00000064687.12	391	377	529	314	439	0	398	400	449	369	272	442	371	391	439	289	383	332	507	523	395	399	417	403
ENSG00000064692.19	106	85	139	85	91	0	73	77	95	122	69	90	103	105	126	99	104	114	119	111	89	134	129	155
ENSG00000064703.12	328	302	418	258	355	0	333	305	322	352	237	350	329	373	393	362	413	364	496	487	421	484	444	488
ENSG00000064726.10	770	706	919	626	871	0	872	872	846	896	568	852	953	892	1002	763	901	838	1257	1198	970	1403	1331	1676
ENSG00000064763.11	3	1	2	2	0	0	0	3	2	0	3	2	1	2	4	3	4	1	3	2	5	22	16	11
ENSG00000064787.13	264	260	301	183	286	0	281	251	282	291	190	277	302	312	391	285	332	268	448	420	350	454	352	424
ENSG00000064835.11	0	0	0	0	0	0	0	0	0	0	0	0	0	0	0	0	0	0	0	0	0	0	0	0
ENSG00000064886.14	0	4	5	2	9	0	1	2	8	3	4	5	2	2	2	3	4	1	9	4	6	4	3	6
ENSG00000064932.16	718	641	939	542	701	0	697	630	708	746	486	799	627	756	736	643	763	625	1083	1006	658	1390	1229	1319
ENSG00000064933.17	162	172	254	122	217	0	215	213	201	208	130	253	202	185	179	210	238	172	313	342	302	315	302	346
ENSG00000064961.19	765	803	1021	601	836	0	802	777	835	844	529	1010	747	888	825	780	894	706	1132	1023	919	874	769	945
ENSG00000064989.13	1	3	3	4	5	0	1	8	5	6	3	4	0	1	3	4	3	5	3	0	3	3	15	18
ENSG00000064995.18	316	265	428	252	403	0	353	401	371	403	218	364	359	385	402	384	404	352	544	552	406	573	462	649
ENSG00000064999.15	439	456	655	351	508	0	500	481	519	512	359	547	475	543	564	476	560	478	723	732	565	716	699	766
ENSG00000065000.18	2848	2692	3722	2365	3177	0	2988	3059	3051	3271	1993	3487	3066	3380	3379	2982	3349	2803	4939	4436	3704	6407	6337	6928
ENSG00000065029.15	539	585	705	463	657	0	597	620	646	625	437	720	589	679	620	568	709	575	886	900	813	776	762	762
ENSG00000065054.14	483	538	670	419	618	0	565	644	626	675	394	687	583	633	597	526	616	541	734	702	509	458	452	437
ENSG00000065057.9	122	155	171	116	168	0	159	160	164	151	105	172	133	164	181	148	170	140	240	222	166	140	115	144
ENSG00000065060.17	1035	861	1341	757	1149	0	1078	997	1069	1054	713	1090	1072	1189	1301	1101	1209	1097	1736	1777	1403	1592	1670	1807
ENSG00000065135.11	1519	1485	1956	1144	1730	0	1688	1626	1589	1711	1156	1754	1743	1756	1955	1589	1711	1686	2515	2280	2028	2800	2750	3240
ENSG00000065150.21	1613	1487	2091	1262	1864	0	1739	1717	1778	1756	1060	1776	1831	1802	2111	1716	1894	1802	2736	2528	2046	2497	2373	2788
ENSG00000065154.11	282	238	341	200	399	0	347	352	351	382	202	333	323	314	398	309	335	324	392	415	314	909	853	1063
ENSG00000065183.16	424	375	539	319	444	0	455	406	474	411	304	471	457	451	532	434	511	448	711	706	543	706	671	766
ENSG00000065243.20	902	811	1153	757	1063	0	993	898	980	986	645	1022	939	1015	1110	967	1032	937	1314	1317	1154	1386	1448	1679
ENSG00000065268.10	415	430	621	357	481	0	413	425	464	529	309	544	436	525	511	434	523	458	785	683	518	849	743	851
ENSG00000065308.5	1288	1290	1758	1117	1569	0	1624	1669	1454	1491	1010	1645	1461	1551	1620	1363	1570	1314	1910	1838	1525	1803	1794	1866
ENSG00000065320.9	52	69	99	50	59	0	65	53	66	78	44	64	66	83	80	87	82	60	136	107	101	264	275	276
ENSG00000065325.13	41	37	57	31	44	0	28	28	39	42	16	36	40	39	51	29	38	35	39	26	27	33	27	49
ENSG00000065328.16	12	12	13	8	5	0	3	6	8	13	11	8	9	10	8	11	6	6	11	12	7	5	10	7
ENSG00000065357.20	65	66	83	51	60	0	52	39	57	65	42	59	59	49	63	54	55	51	79	75	68	120	115	103
ENSG00000065361.15	1991	2124	2714	1875	2796	0	2716	2698	2445	2584	1706	2926	2534	2724	2555	2219	2625	2283	3261	3483	2841	2210	1993	2195
ENSG00000065371.17	0	0	0	0	0	0	0	0	0	0	0	0	0	0	0	0	0	0	0	0	0	0	0	0
ENSG00000065413.20	54	43	75	42	63	0	47	58	53	58	36	55	55	69	58	54	40	38	67	65	73	137	162	153
ENSG00000065427.14	1317	1354	1790	995	1608	0	1421	1469	1480	1508	1008	1563	1508	1640	1735	1391	1718	1475	2361	2137	1795	2611	2468	2807
ENSG00000065457.10	148	113	184	107	178	0	174	169	144	131	110	178	132	162	170	170	176	157	240	222	187	283	292	287
ENSG00000065485.20	1130	1151	1533	968	1486	0	1405	1408	1472	1417	907	1454	1159	1378	1318	1070	1208	1051	1305	1289	992	991	912	1074
ENSG00000065491.8	195	187	243	163	242	0	199	192	207	210	153	246	200	273	215	207	214	178	305	352	231	331	320	321
ENSG00000065518.8	960	857.93	1197	792.99	1045.98	0	986	978	1051	1071.88	678	1129.93	972.99	1069.96	1054.89	952.98	1126.9	930.87	1445.98	1450	1033	1417	1214.94	1432.88
ENSG00000065526.11	1211	1025	1532	873	1158	0	1158	1088	1209	1164	737	1193	1171	1256	1337	1097	1269	1112	1597	1683	1416	1711	1736	1860
ENSG00000065534.18	1655	1839	2221	1568	2407	0	2379	2338	2168	2171	1404	2396	2153	2359	2238	1885	2263	1960	2826	2826	2147	1550	1389	1496
ENSG00000065548.18	684	689	938	551	857	0	792	721	827	809	549	868	779	861	827	796	921	917	1236	1198	1029	1449	1418	1630
ENSG00000065559.15	877	763.98	1121	679	940	0	820	819	897	1001.98	591.99	936	883	960	992	804	914	937.99	1256.99	1203	1036	1179.99	1267	1351.99
ENSG00000065600.12	79	71	79	35	78	0	52	82	67	80	47	70	69	70	107	54	88	85	115	117	89	166	148	179
ENSG00000065609.14	0	2	2	0	1	0	0	0	0	0	2	5	1	0	1	1	1	0	1	2	0	6	6	7
ENSG00000065613.15	1110	950	1407	948	1287	0	1165	1241	1148	1267	730	1170	1223	1331	1568	1230	1344	1222	2005	1765	1532	3048	3319	3616
ENSG00000065615.14	142	116	162	95	130	0	122	154	128	151	91	132	125	139	158	137	118	136	231	196	179	298	277	309
ENSG00000065618.21	6	7	13	6	4	0	12	12	4	15	5	11	4	8	13	7	10	11	12	7	5	60	31	42
ENSG00000065621.15	19	20	35	17	19	0	26	25	34	19	18	22	28	21	23	29	37	23	32	26	21	16	15	26
ENSG00000065665.21	138	159	184	114	156	0	175	183	162	180	141	182	149	173	177	152	186	158	246	235	169	195	168	194
ENSG00000065675.15	22	17	25	15	21	0	22	18	24	22	15	27	19	24	27	22	24	21	36	29	28	66	58	63
ENSG00000065717.15	137	140	163	105	172	0	119	138	137	131	104	143	111	163	133	136	150	96	185	178	137	86	61	74
ENSG00000065802.12	446	409	661	344	520	0	527	491	501	478	327	561	480	507	553	487	538	483	698	713	590	760	814	866
ENSG00000065809.13	3201	2993	4334	2433	3729	0	3573	3417	3359	3613	2339	3653	3393	3495	4059	3406	3635	3426	4503	4464	3717	3772	3383	3923
ENSG00000065833.9	787	715	1055	584	857	0	900	874	788	988	572	969	961	970	1101	899	1009	961	1557	1453	1185	1539	1413	1556
ENSG00000065882.16	681	636	825	486	679	0	664	693	671	713	441	710	699	707	760	721	788	754	1118	1130	908	1191	1121	1120
ENSG00000065883.16	962	894	1285	842	1123	0	1011	1024	1090	1178	706	1164	1023	1114	1254	1050	1256	1063	1648	1663	1370	1614	1563	1860
ENSG00000065911.12	633	607	985	474	621	0	544	555	645	704	382	704	665	739	826	709	879	774	1115	1065	895	880	992	1016
ENSG00000065923.10	478	456	637	374	532	0	523	549	519	597	336	530	547	553	565	519	560	544	779	765	600	887	870	1006
ENSG00000065970.9	291	299	381	235	363	0	293	315	348	355	217	327	316	362	335	278	353	324	489	451	395	523	489	504
ENSG00000065978.19	4574.13	4324.26	6148.25	3676.65	5463.92	0	5044.04	5219.65	5367.73	5336.25	3473.66	5426.35	4847.11	5389.72	5717.46	4993.09	5885.72	5242.14	8087.46	7375.81	5900.89	10003.8	9326.83	10604.1
ENSG00000065989.16	36	37	52	32	22	0	24	34	31	29	27	23	26	28	29	25	39	28	46	51	36	123	127	160
ENSG00000066027.12	753	766	1124	677	1092	0	1006	995	1033	1017	622	1094	808	989	1060	902	1018	871	1339	1233	968	1500	1469	1615
ENSG00000066032.18	92	101	126	90	126	0	131	125	108	90	91	154	120	123	107	107	112	91	112	142	86	38	41	38
ENSG00000066044.15	1007	934	1358	816	1178	0	1159	1022	1124	1089	730	1130	1071	1188	1232	1109	1312	1098	1750	1596	1313	1618	1338	1624
ENSG00000066056.14	0	0	0	0	0	0	1	1	0	1	0	0	1	0	1	1	2	0	0	1	1	1	2	1
ENSG00000066084.13	1018	992	1426	859	1195	0	1082	1086	1142	1076	740	1165	1157	1139	1318	998	1132	1056	1561	1498	1265	1607	1731	1753
ENSG00000066117.15	757	692	1047	568	793	0	761	733	795	819	517	834	861	804	865	754	841	788	1218	1168	989	1176	1136	1153
ENSG00000066135.13	1085	888	1224	784	987	0	993	978	956	988	689	1143	992	1106.5	1132	972	925	974.81	1380.76	1319	1099.55	1271	1149.32	1198
ENSG00000066136.20	552	509	850	458	714	0	678	668	676	691	503	733	651	677	674	583	721	628	983	914	684	767	696	802
ENSG00000066185.13	13	14	28	11	21	0	22	15	18	23	11	16	19	12	16	21	21	20	23	22	26	13	11	10
ENSG00000066230.12	23.17	34.58	38.22	23.91	43.66	0	30.95	40.87	29.02	37.43	24.62	52.59	28.31	39.02	44.78	41.05	43.58	20.28	66.79	83.44	42.58	56.48	38.94	60.35
ENSG00000066248.15	254	318	350	257	417	0	390	352	386	371	224	407	317	390	317	303	313	266	340	368	302	251	221	249
ENSG00000066279.18	84	68	117	60	60	0	54	47	78	94	37	58	58	72	80	54	62	70	84	93	67	42	42	47
ENSG00000066294.14	1	0	1	0	0	0	0	0	0	0	0	0	0	0	0	0	0	1	0	0	0	0	0	0
ENSG00000066322.15	1035	883	1273	748	1054	0	1025	1057	1096	1049	693	1221	1102	1145	1187	963	1155	1050	1602	1536	1166	1934	1912	2049
ENSG00000066336.11	0	0	0	0	3	0	1	1	0	0	1	1	0	0	0	0	0	1	1	0	0	0	0	0
ENSG00000066379.15	79	91	106	65	83	0	86	105	87	80	66	98	92	90	81	88	98	82	139	138	117	167	144	191
ENSG00000066382.16	5	5	8	4	9	0	7	1	2	2	4	3	1	7	3	4	4	3	7	6	6	6	7	11
ENSG00000066405.13	130	107	141	91	102	0	108	102	118	133	73	124	114	128	158	125	125	126	275	233	237	413	384	380
ENSG00000066422.5	384	360	482	300	459	0	432	352	406	434	267	422	426	409	437	393	466	410	627	620	476	556	522	587
ENSG00000066427.24	224	279	322	205	308	0	276	271	241	303	164	281	283	267	324	290	273	266	428	386	369	384	389	434
ENSG00000066455.13	836	774	1117	766	1096	0	969	1022	1020	1005	642	985	1032	953	1092	976	1105	860	1395	1292	1097	1826	1903	2223
ENSG00000066468.22	674	580	955	541	630	0	481	539	672	659	368	572	612	643	723	670	622	631	896	772	708	441	356	428
ENSG00000066557.6	391	402	570	335	496	0	471	475	454	448	323	470	497	468	549	487	494	460	637	620	510	479	552	535
ENSG00000066583.12	524	529	743	493	725	0	676	679	614	658	477	758	601	646	706	567	674	566	782	815	597	661	567	667
ENSG00000066629.17	188	181	215	127	232	0	204	195	204	195	113	261	219	184	261	214	198	225	283	290	228	415	463	538
ENSG00000066651.20	130	130	199	103	144	0	123	160	163	142	94	146	186	139	187	170	183	180	201	246	172	228	247	309
ENSG00000066654.14	521	520	662	403	578	0	618	514	553	525	396	617	544	633	617	619	634	622	848	811	682	806	702	876
ENSG00000066697.14	581	507	732	393	571	0	497	531	610	572	354	608	572	618	726	647	754	638	1048	989	855	1609	1519	1677
ENSG00000066735.14	8	0	4	8	7	0	5	3	4	2	6	8	4	7	4	8	2	7	7	5	3	27	24	36
ENSG00000066739.12	801	775	1100	733	1040	0	919	897	866	945	576	946	888	938	960	813	908	868	1182	1186	1009	1174	1121	1302
ENSG00000066777.9	1207	1038	1460	976	1242	0	1155	1290	1332	1212	853	1436	1264	1458	1396	1228	1322	1347	1877	1733	1564	2424	2537	2823
ENSG00000066813.14	487.34	459.22	585.38	424.01	729.03	0	762.72	667.8	595.94	610.08	391.45	806.31	570.77	605.59	640.91	353.33	457.52	411.51	318.59	404.28	357.21	59.2	58.18	89.54
ENSG00000066827.16	117	125	169	135	135	0	126	136	132	137	96	188	134	172	175	133	178	119	212	170	192	212	171	182
ENSG00000066855.16	541	568	783	531	701	0	651	677	637	699	426	733	693	692	768	575	644	633	784	807	674	911	885	1008
ENSG00000066923.17	15.47	5.12	5.24	9.35	6.37	0	12.24	6.08	7.08	11.18	11.43	7.37	8.14	10.29	4.08	3.03	4.39	6	6.27	8.54	9.99	5.25	5.15	6.25
ENSG00000066926.11	737	699	952	592	815	0	763	819	775	808	539	835	864	916	957	760	943	866	1288	1215	1058	828	869	901
ENSG00000066933.16	202	204	234	154	182	0	213	199	222	219	144	223	203	190	243	214	235	200	300	317	295	522	568	619
ENSG00000067048.17	0	0	0	0	0	0	0	0	0	0	0	0	0	0	0	0	0	0	0	0	0	0	0	0
ENSG00000067057.17	286	199	293	149	183	0	170	138	176	216	127	209	227	229	243	236	291	221	547	394	369	2169	2278	2310
ENSG00000067064.11	5235	5395	6946	4883	8016	0	8000	7877	6816	7235	4868	8440	6086	6618	6619	4750	5156	4748	5321	5487	4439	3984	3340	3836
ENSG00000067066.17	557.18	502.65	768	446	726.9	0	677.24	642.09	614	607.63	423.78	719	590.54	685.05	668	656	724.86	697.58	832.41	836.27	683.63	794.6	831.58	837
ENSG00000067082.15	4965	4768	6296	3778	5603	0	5234	5228	5314	5203	3527	6042	5686	5834	6113	5462	6046	5362	7441	7177	5788	7367	7219	8291
ENSG00000067113.17	521	505	757	426	651	0	535	579	603	678	417	650	582	650	588	567	615	574	901	801	646	837	706	822
ENSG00000067141.17	652	514	785	482	647	0	600	583	611	651	390	615	590	616	743	570	713	643	875	855	720	965	914	996
ENSG00000067167.8	3377	3047	4465	2744	4081	0	3583	3675	3704	3934	2458	3808	3809	3803	4487	3274	3881	3709	5172	4766	4059	6189	6194	7053
ENSG00000067177.15	123.53	110.6	151.64	90	119.86	0	114	113.6	122	113.37	75	137.15	138.73	136.02	120.57	114.52	133.96	139.35	214.25	196.77	188.25	384.2	424.68	514.16
ENSG00000067182.7	1010	969	1373	890	1095	0	1061	1027	1046	1098	713	1204	1085	1162	1244	942	1236	1032	1795	1615	1329	2664	2637	2962
ENSG00000067191.16	24	10	29	20	15	0	18	16	12	9	18	20	35	17	21	17	21	15	28	41	20	53	48	56
ENSG00000067208.14	483	405	604	341	507	0	429	422	520	514	307	503	468	529	550	402	491	460	669	653	533	741	718	862
ENSG00000067221.14	211	228	287	159	262	0	216	221	266	232	170	241	210	263	261	242	293	226	415	349	323	540	477	513
ENSG00000067225.18	3316	2112	3984	1848	2063	0	1683	1621	2439	2726	1373	2207	2311	2351	3253	2058	2420	2304	3650	3137	2586	6999	6582	7227
ENSG00000067248.10	598	625	841	510	719	0	669	671	683	739	479	784	725	717	798	672	777	732	927	938	784	921	854	989
ENSG00000067334.14	619	565	795	473	645	0	648	555	651	669	437	727	644	680	752	652	726	684	1098	1127	904	1391	1290	1520
ENSG00000067365.14	300	268	362	202	355	0	314	347	308	336	245	368	301	301	307	334	347	296	512	486	394	436	459	548
ENSG00000067369.13	581	517	719	463	608	0	562	589	616	617	393	625	617	629	688	589	668	624	943	914	799	1169	1264	1390
ENSG00000067445.21	405	415	561	322	443	0	421	409	457	417	285	451	464	434	505	436	492	390	620	558	541	488	478	512
ENSG00000067533.6	239	246	296	190	300	0	276	251	282	315	197	289	267	229	345	309	295	295	414	419	363	461	406	473
ENSG00000067560.12	3887	3704	5147	3176	4633	0	4268	4365	4264	4321	2842	4760	4276	4659	5048	4231	4681	4287	6389	5857	4743	7968	7689	8630
ENSG00000067596.12	511	466	691	418	584	0	607	583	613	630	352	580	575	627	699	571	630	571	955	847	719	947	861	1063
ENSG00000067601.8	2	4	8	6	8.11	0	12	6	3.55	4	4.63	10.47	7	6	4	9.16	9	4	14	13	13	16.49	17	13.66
ENSG00000067606.17	671	691	910	561	801	0	711	741	784	678	488	807	671	791	794	733	805	730	1127	1023	852	1809	1523	1843
ENSG00000067646.12	0	0	0	0	0	0	0	0	0	0	0	0	0	0	0	0	0	0	0	0	0	0	0	0
ENSG00000067704.10	1419	1373	1872	1182	1767	0	1682	1548	1575	1713	1073	1673	1594	1726	1976	1606	1763	1615	2207	2042	1677	1992	1776	2011
ENSG00000067715.14	27	23	40	23	34	0	31	30	24	29	22	34	31	34	31	26	39	37	45	29	34	60	61	42
ENSG00000067798.16	33	47	68	31	60	0	71	63	66	56	37	60	55	42	70	63	64	45	72	74	61	52	53	34
ENSG00000067829.19	323	272	388	246	333	0	329	315	310	342	220	360	262	326	319	296	369	308	428	425	349	612	622	664
ENSG00000067836.12	386	445	488	302	443	0	402	429	433.48	393	299.16	454	399	470	458	393	504	369	597.89	532	429	386	365	363
ENSG00000067840.12	2	1	1	2	0	0	2	1	1	0	0	1	1	1	0	0	0	0	1	0	1	3	1	2
ENSG00000067842.17	2	0	0	0	0	0	0	0	1	0	0	0	0	0	0	0	0	0	0	0	0	0	0	0
ENSG00000067900.8	1404.99	1357.11	1782.7	1150.77	1740.35	0	1670.92	1678.28	1696.59	1647.61	1125.37	1718.27	1669.63	1651.74	1900.67	1525.31	1747.6	1506.62	2196.54	2152.04	1945.01	2296.74	2383.12	2645.23
ENSG00000067955.15	509	391	613	324	459	0	412	365	422	430	280	486	501	513	534	491	499	460	717	652	554	1046	986	1069
ENSG00000067992.15	431	397	595	371	647	0	623	596	591	579	327	515	516	580	612	530	491	475	636	661	550	351	315	377
ENSG00000068001.14	708	659	931	512	701	0	631	627.9	687	685	408	752	732	744	839	634	793	654	1103	1043	771	1123	942	1026
ENSG00000068024.16	237	202	330	196	233	0	236	242	259	228	182	248	261	274	261	227	298	244	382	391	297	357	326	387
ENSG00000068028.17	272	235	344	185	275	0	187	190	244	290	174	278	270	258	314	258	286	228	408	394	305	460	447	559
ENSG00000068078.18	1480	1498	1924	1282	1663	0	1488	1586	1683	1651	1108	1771	1604	1769	1789	1563	1836	1451	2391	2246	1790	1194	958	1139
ENSG00000068079.7	95	111	172	76	163	0	171	113	135	123	92	157	126	139	168	114	166	125	189	179	149	129	99	118
ENSG00000068097.14	211	219	291	199	359	0	297	295	295	279	177	278	273	253	309	297	274	266	406	374	303	380	333	378
ENSG00000068120.15	1005	1003	1286	882	1227	0	1212	1184	1138	1197	793	1300	1070	1195	1216	1106	1311	1081	1863	1720	1404	2225	2058	2299
ENSG00000068137.15	184	216	279	163	269	0	247	238	211	240	147	320	227	266	226	199	231	202	352	329	277	270	246	298
ENSG00000068305.17	868	851	1134	686	1045	0	971	938	881	1023	657	1059	1060	1075	1038	930	963	986	1320	1365	1089	1339	1342	1506
ENSG00000068308.13	1277	1335	1841	1123	1596	0	1493	1500	1524	1550	1006	1650	1501	1575	1719	1337	1545	1416	2132	2050	1727	2410	2284	2541
ENSG00000068323.17	2515	2295	3024	1784	2477	0	2210	2184	2327	2488	1586	2671	2424	2720	2767	2292	2740	2509	4035	4106	3231	4150	3944	4281
ENSG00000068354.16	395.95	360.91	497.53	274.92	417.97	0	363.87	378.7	352.95	417.97	258	429.89	357.93	381.51	425.9	350.8	369	388.95	507	504	410.95	530.85	488.52	601.85
ENSG00000068366.20	17140	16826	22133	15676	24776	0	24007	23481	21285	22555	14633	24232	19964	20818	23086	15484	17011	15928	17086	17116	14604	11661	10386	11747
ENSG00000068383.19	813	769	1002	687	932	0	824	838	871	876	586	964	862	914	951	866	927	823	1232	1110	904	1182	1162	1276
ENSG00000068394.11	215	198	314	194	253	0	248	251	236	240	162	263	256	234	316	281	268	258	365	372	281	364	368	391
ENSG00000068400.13	1207	1190	1481	1020	1297	0	1310	1303	1200	1309	932	1374	1208	1331	1283	1305	1446	1216	1877	2100	1608	1822	1574	1838
ENSG00000068438.15	270	220	295	213	273	0	207	262	253	276	160	283	254	263	286	240	240	253	396	323	327	584	574	654
ENSG00000068489.12	40	21	47	14	27	0	27	12	29	22	22	22	25	22	35	27	36	27	25	25	20	16	15	22
ENSG00000068615.18	70	65	101	65	81	0	112	91	105	83	67	108	73	64	94	84	99	71	87	89	72	111	124	112
ENSG00000068650.18	1748	1756	2381	1590	1996	0	1941	1926	1830	1935	1318	2104	2044	2152	2138	1741	1992	1857	2810	2645	2312	3264	3277	3507
ENSG00000068654.16	963	890	1224	731	1013	0	1013	909	1028	1035	656	1108	1104	1184	1274	1032	1152	1002	1687	1604	1330	1459	1404	1477
ENSG00000068697.7	2334	2094	3028	1793	2979	0	2551	2557	2557	2584	1722	2729	2544	2729	2964	2404	2722	2656	3412	3300	2774	4319	4379	4996
ENSG00000068724.17	369	359	519	309	410	0	398	383	442	454	272	465	388	419	382	373	434	373	536	513	455	645	552	656
ENSG00000068745.15	1561	1521	2077	1231	1672	0	1663	1547	1725	1786	1147	1846	1517	1665	1743	1401	1817	1582	2201	2134	1725	1480	1249	1595
ENSG00000068781.21	0	0	1.5	1.29	0	0	0	0	0	0	0	0	0	0	0	0	0	0	0	0	3.22	1.4	0	0
ENSG00000068784.13	122	133	164	120	167	0	129	164	150	151	98	147	146	164	185	151	183	144	208	196	179	231	220	271
ENSG00000068796.16	371	291	439	269	381	0	302	349	338	349	234	386	398	399	440	340	391	316	515	542	424	689	725	804
ENSG00000068831.19	0	0	2	1	2	0	1	0	0	4	0	0	1	1	0	0	0	1	1	0	0	2	2	0
ENSG00000068878.15	1305	1128	1646	947	1353	0	1426	1321	1443	1446	867	1403	1348	1467	1624	1423	1538	1441	2125	2121	1746	2976	3240	3322
ENSG00000068885.15	217	189	271.47	178.02	240	0	244.33	250	216.18	217.56	151	249.98	250.12	283	250	235	249	214.12	324.25	337.77	277.01	379	361.9	416
ENSG00000068903.20	742	707	944	613	826	0	799	837	779	887	609	963	843	870	912	745	910	748	1171	1219	955	1078	994	1080
ENSG00000068912.14	641	621	846	537	817	0	737	727	790	821	488	732	719	775	839	674	823	742	1013	963	837	1425	1721	1904
ENSG00000068971.14	422	381	554	321	453	0	426	393	394	475	279	495	419	498	491	401	457	445	590	699	493	691	701	924
ENSG00000068976.14	9	11	10	8	13	0	8	7	5	9	3	3	12	8	3	7	9	8	11	10	6	5	13	5
ENSG00000068985.5	0	0	0	0	0	0	0	0	0	0	0	0	0	0	0	0	0	0	0	0	0	0	0	0
ENSG00000069011.16	17	23	22	6	25	0	25	16	22	13	12	23	11	30	27	13	10	16	27	17	14	64	45	64
ENSG00000069018.18	0	0	0	0	0	0	0	0	0	0	0	1	0	0	0	0	0	0	0	0	0	0	0	0
ENSG00000069020.18	638	594	823	501	670	0	621	637	661	677	440	628	570	740	685	595	675	661	903	887	771	882	871	938
ENSG00000069122.19	0	0	0	0	0	0	0	0	0	0	1	2	0	0	0	0	0	0	0	0	0	0	0	0
ENSG00000069188.17	126	111	140	119	99	0	74	97	139	101	79	106	101	132	157	123	121	112	196	199	151	519	503	614
ENSG00000069206.15	0	0	0	0	2	0	0	0	0	0	0	0	0	1	1	0	0	0	0	0	0	0	0	0
ENSG00000069248.12	652	579	780	496	741	0	695	759	656	733	431	704	697	707	826	691	736	644	966	902	752	753	806	925
ENSG00000069275.13	2473	2475	3370	2307	3526	0	3155	3287	3155	3314	2049	3274	2953	3114	3376	2810	3102	2639	3647	3524	2943	2340	2296	2457
ENSG00000069329.18	1743	1535	2316.97	1387	2001	0	1840	1763	1828.99	1928	1256	1961	1912	1998	2316	2005	2138.99	1912	2879	2699.99	2244	3144	3175.9	3615
ENSG00000069345.12	961	918	1301	703	996	0	946	958	1038	1102	697	1085	1001	1105	1252	1101	1177	1107	1808	1569	1343	1563	1502	1676
ENSG00000069399.15	464	468	633	351	499	0	473	434	499	439	279	523	399	455	479	388	505	411	581	610	509	757	673	715
ENSG00000069424.15	28	19	35	12	26	0	24	12	21	13	12	18	17	27	14	18	24	16	36	27	36	20	26	27
ENSG00000069431.11	0	0	1	0	1	0	0	0	0	3	0	0	1	0	0	0	0	0	0	2	1	0	0	0
ENSG00000069482.7	8	10	18	8	12	0	6	2	4	7	2	4	9	5	6	3	11	13	20	7	10	116	109	117
ENSG00000069493.15	92.82	93.69	135.14	80.82	121.67	0	127.78	91.4	137.34	116.71	69.17	139.04	90.34	109.14	92.33	128.01	132.07	114.59	140.22	180.81	170.38	124.19	123.75	149.21
ENSG00000069509.6	151	148	199	86	159	0	141	112	153	140	109	158	141	166	173	146	207	155	217	214	168	218	182	224
ENSG00000069535.14	1827	2021	2716	1866	3006	0	2979	2875	2628	2505	1783	2940	2457	2713	2575	2290	2587	2324	2986	2914	2322	1142	1044	1165
ENSG00000069667.16	361	366	509	306	461	0	420	459	433	413	296	497	399	464	486	382	474	406	562	639	513	549	514	572
ENSG00000069696.7	12	9	25	18	18	0	12	17	22	12	10	24	15	15	7	18	17	13	32	38	31	29	17	19
ENSG00000069702.11	41	34	47	33	44	0	40	37	35	49	19	61	46	67	76	60	51	48	56	50	40	48	45	40
ENSG00000069764.9	5	0	3	4	1	0	0	3	0	0	1	4	2	4.71	4.47	2	5	2	3	4	5	0	1	0
ENSG00000069812.11	16	13	23	12	9	0	10	8	23	8	7	15	13	28	16	11	10	14	20	21	12	38	29	36
ENSG00000069849.11	575	466	717	432	559	0	550	475	591	584	360	584	522	562	559	557	603	568	817	900	640	1305	1304	1595
ENSG00000069869.16	694	640	892	588	803	0	805	735	747	721	533	814	873	874	981	813	892	800	1177	1058	881	1092	1268	1341
ENSG00000069943.10	89	98	128	77	105	0	119	111	115	110	68	117	131	103	107	98	115	120	136	139	130	142	120	153
ENSG00000069956.12	2311	2143	3026.99	1965	2839	0	2670	2686	2570	2740	1645	2870	2561	2810	3010	2643	2896	2686	3907	3610	3123	4182	4141.98	4817.98
ENSG00000069966.18	333	362	469	243	438	0	409	410	413	444	257	467	388	453	404	352	440	393	578	515	431	598	674	721
ENSG00000069974.16	340	344.27	477.6	290.13	435	0	400.08	388.48	426.14	397.03	233.13	430.03	405.08	448.32	483.15	417.27	436	379	540.57	540.57	465.79	1017.87	969.07	1135.53
ENSG00000069998.12	236	274	354	214	319	0	274	287	324	355	169	315	280	329	334	284	356	343	504	453	400	469	385	459
ENSG00000070010.19	1013	938	1328	789	1072	0	1079	1031	1040	1048	661	1116	1054	1063	1144	1171	1283	1064	1605	1631	1351	1549	1515	1692
ENSG00000070018.9	979	928	1317	885	1136	0	1110	1197	1145	1164	737	1100	1125	1229	1255	1125	1238	1085	1527	1492	1321	1078	969	1123
ENSG00000070019.5	5	10	12	11	7	0	15	10	13	12	5	6	5	6	5	25	6	10	11	13	15	6	10	7
ENSG00000070031.4	0	0	0	0	2	0	0	1	1	2	1	0	0	0	0	0	0	0	0	0	2	0	0	0
ENSG00000070047.12	1291	1250	1654	1017	1310	0	1334	1366	1313	1365	992	1661	1444	1561	1542	1411	1643	1358	2500	2288	1805	2043	2020	2095
ENSG00000070061.15	1844	2037	2550	1749	2851	0	2803	2724	2579	2515	1758	2769	2156	2372	2389	2091	2386	2075	2471	2666	2131	1749	1634	1821
ENSG00000070081.17	521	580	766	458	668	0	703	608	645	737	433	722	625	545	730	577	663	595	796	833	635	1583	1638	1866
ENSG00000070087.14	1008	930	1289	807	1072	0	1056	1012	1082	1108	722	1175	1098	1239	1272	1141	1280	1154	1758	1698	1427	2053	2074	2204
ENSG00000070159.14	534	518	791	443	711	0	641	620	603	685	422	692	632	676	767	637	759	711	984	1015	884	1510	1539	1826
ENSG00000070182.21	0	5	3	1	2	0	0	0	0	3	1	0	0	1	0	2	3	0	6	2	1	3	6	11
ENSG00000070190.13	2	1	0	0	0	0	1	0	0	0	0	1	1	0	0	0	2	0	0	1	0	4	6	7
ENSG00000070193.4	0	0	0	0	0	0	0	0	0	0	0	0	0	0	0	0	0	0	0	0	0	0	0	0
ENSG00000070214.16	1144	1267	1595	1058.43	1704	0	1618	1637	1611	1487	965	1635	1453	1539	1605	1406	1593	1424	1884	1819	1432	1490	1399	1498
ENSG00000070269.14	319	269	392	213	368	0	319	296	385	365	215	343	300	370	353	306	369	316	458	508	393	457	414	470
ENSG00000070366.14	797	726	935	610	870	0	844	894	803	865	548	910	752	825	920	747	833	766	1247	1172	1004	1215	1124	1287
ENSG00000070367.16	902.78	865.92	1143.83	658.98	941	0	907.98	944.95	974	941.94	599.99	1008.97	1004.48	1026.85	1154.77	868.96	974.94	942.95	1381.96	1292.94	1154.95	1527.84	1582.57	1813.87
ENSG00000070371.16	259	240	339	222	286	0	253	282	271	278	189	307	253	311	274	264	304	269	351	376	345	262	228	259
ENSG00000070388.11	5	10	7	1	6	0	4	5	3	6	6	3	3	10	4	5	1	5	10	7	7	1	1	0
ENSG00000070404.10	3269	3817	5236	3045	4707	0	4326	4360	3889	3560	2582	4667	3313	3765	3532	2888	3619	2700	3012	3072	2330	2071	2077	2118
ENSG00000070413.20	2294	2116	2836	1790	2434	0	2295	2276	2418	2386	1612	2600	2149	2349	2546	2086	2406	2008	3069	2911	2382	2553	2182	2400
ENSG00000070423.18	766	855	1144	708	798	0	828	846	956	896	605	1075	793	991	869	802	1058	829	1303	1209	888	1149	1079	1291
ENSG00000070444.15	396	426	544	349	416	0	468	414	439	451	291	510	413	468	477	449	522	371	800	723	499	657	645	720
ENSG00000070476.15	498	516	686	448	599	0	587	620	575	621	369	641	640	611	591	558	673	517	865	918	778	827	880	994
ENSG00000070495.14	279	268	326	217	332	0	297	296	329	349	215	370	285	309	388	328	324	278	451	438	383	531	492	633
ENSG00000070501.12	193	190	219	157	221	0	167	226	211	188	125	253	202	186	256	240	212	226	336	314	288	349	281	310
ENSG00000070526.15	3	1	4	5	2	0	11	1	5	11	8	4	4	4	7	4	5	1	7	3	5	4	1	6
ENSG00000070540.13	344	266	377	212	297	0	276	295	302	358	184	336	328	306	415	259	297	308	467	413	335	937	951	1040
ENSG00000070601.10	31	47	58	33	75	0	75	56	43	57	40	58	57	59	37	39	60	38	47	57	45	23	2	10
ENSG00000070610.14	1294	1341	1828	1089	1646	0	1448	1490	1474	1574	969	1583	1541	1497	1605	1389	1698	1475	2175	2348	1866	1958	1879	2015
ENSG00000070614.15	4272	4292	5764	3626	5046	0	4967	4790	4792	4755	3219	5197	4593	4873	5200	4087	4738	4141	5793	5651	4482	4050	3924	4190
ENSG00000070669.17	1973.71	1919.79	2830.21	1446.01	2290.48	0	2057.38	2063.02	1980.14	2063.19	1346.93	2368.85	2570.96	2472.38	2747.74	2983.97	3212.01	2937.77	4882.27	4642.09	3792.61	4522.08	4342.78	4914.39
ENSG00000070718.12	111	123	166	73	127	0	133	128	144	139	94	151	137	136	152	130	144	131	167	188	160	254	230	287
ENSG00000070729.14	3	3	0	0	2	0	1	0	1	1	0	0	3	2	1	0	0	2	1	0	0	0	0	0
ENSG00000070731.11	10.7	7.79	25.97	11.69	15	0	5.96	4.81	9.56	10.48	8.83	9.42	9.45	10.2	26.06	13	12.4	12.82	17.77	1	18.67	13.81	0	13.65
ENSG00000070748.18	0	0	0	0	0	0	0	0	0	0	0	0	0	0	0	0	0	0	0	0	0	0	0	0
ENSG00000070756.16	7080.92	6907.84	9524.7	5751.92	8638.93	0	8059.99	7713.82	8025.76	8021.76	5123.9	8413.79	7849.7	8535.72	9079.69	7876.89	8918.84	7756.95	12036.8	11495.8	9276.72	15259.7	14635.9	16369.9
ENSG00000070759.17	84	90	101	68	122	0	94	117	101	97	68.65	117	84	99.59	98	93	101	94	93	85	93	53	63	67
ENSG00000070761.8	212	199	314	137	243	0	226	211	238	239	148	227	278	231	229	240	234	261	304	314	235	293	335	370
ENSG00000070770.9	1075	1006	1366	838	1225	0	1170	1168	1082	1116	766	1177	1127	1159	1395	1111	1238	1208	1742	1641	1361	1736	1694	1896
ENSG00000070778.13	1462	1386	1973	1141	1560	0	1591	1472	1582	1603	1058	1691	1533	1618	1792	1457	1717	1509	2155	1894	1684	1734	1708	1893
ENSG00000070785.17	169	166	207	143	183	0	159	170	174	188	120	168	161	189	198	170	192	193	275	240	194	279	297	328
ENSG00000070808.16	0	0	1	0	3	0	4	4	0	0	0	0	0	0	0	0	2	1	0	2	2	1	0	1
ENSG00000070814.20	801	736	1082	592	783	0	712	779	826	818	512	845	807	929	958	829	915	812	1275	1226	932	871	810	920
ENSG00000070831.17	4480.34	3970.4	5837.82	3248.52	4944.31	0	4649.04	4548.91	4681.88	4966.59	2991.15	4990.72	4515.95	4897.9	5553.48	4734.92	5121.55	4738.31	6698.11	6361.19	5145.99	6253.56	5895.6	6558.32
ENSG00000070882.13	333	247	465	249	314	0	310	317	309	401	229	324	347	362	403	330	367	344	539	478	473	821	790	876
ENSG00000070886.12	0	0	3	0	1	0	1	0	1	1	0	0	2	0	0	1	0	1	2	0	1	0	0	2
ENSG00000070915.9	0	0	2	2	1	0	0	1	0	0	0	0	1	0	1	1	0	0	1	2	0	0	0	0
ENSG00000070950.10	117	82	104	80	101	0	107	116	104	115	62	113	102	114	116	95	114	104	152	147	127	146	167	223
ENSG00000070961.15	2421	1928	3012	1680	2479	0	2169	2200	2480	2488	1532	2419	2573	2614	3091	2427	2723	2531	3809	3509	2950	3243	3124	3529
ENSG00000070985.13	0	1	2	1	0	0	0	2	1	1	0	0	0	1	4	0	2	0	1	0	5	1	0	1
ENSG00000071051.14	984	867	1280	682	795	0	663	796	926	977	532	990	813	960	1030	795	1022	768	1493	1306	1002	1892	1802	1792
ENSG00000071054.16	3807	3252	4861	2822	3960	0	3501	3448	3915	3972	2416	3919	3771	4038	4438	3625	4101	3663	5541	5141	4323	6387	6290	6719
ENSG00000071073.13	347	304	382	265	392	0	402	375	422	421	233	356	384	379	413	316	387	355	476	478	397	332	322	403
ENSG00000071082.11	3012	2847.98	4044.9	2257.99	3434.99	1	3084.99	3078.7	3289.84	3386.91	2122	3475.99	3024	3297.62	3581.97	3247.79	3688.84	3218.95	4909.4	4625.99	3611.71	5560.73	5139.77	5805.31
ENSG00000071127.17	6536	6106	8583	4826	6707	0	6344	6249	6678	6736	4236	7098	6652	7311	7663	6790	7472	6722	10758	9874	7818	13660	13303	14193
ENSG00000071189.21	494	494	599	426	563	0	501	552	526	557	381	519	545	606	616	514	633	578	738	721	649	830	793	923
ENSG00000071203.9	0	0	0	0	0	0	0	0	0	0	0	0	0	0	0	0	0	0	0	0	0	0	0	0
ENSG00000071205.12	13	12	27	10	12	0	16	20	11	11	7	28	17	20	23	18	29	26	33	36	26	101	82	101
ENSG00000071242.12	867	757	1076	659	959	0	905	884	902	890	584	976	988	954	1053	1060	1032	981	1582	1505	1168	1965	1926	2093
ENSG00000071243.16	101	116	136	90	129	0	123	133	126	120	88	147	117	146	136	126	144	141	170	167	143	139	159	187
ENSG00000071246.11	23	18	20.08	20	12.24	0	26.89	25	20	18	15	17.93	17	21	18	20	16.96	9	30.09	34	31	60.87	60	81.86
ENSG00000071282.12	375	328	474	215	276	0	256	249	301	344	207	343	308	332	407	308	377	354	534	469	383	991	982	1034
ENSG00000071462.11	667	680	856	563	719	0	731	728	758	674	515	848	716	740	764	658	791	710	1126	1131	991	1217	1260	1371
ENSG00000071537.14	3320	3053	4352	2581	3836	0	3659	3633	3675	3670	2508	3661	3512	3662	4298	3419	3618	3388	4550	4399	3982	5898	6181	7087
ENSG00000071539.14	38	27	59	27	34	0	25	21	25	32	16	31	30	39	32	25	39	22	42	38	45	46	51	77
ENSG00000071553.17	1914	1887	2672	1517	2325	0	2096	2063	2156	2017	1372	2388	2091	2209	2302	1895	2313	1992	2999	2737	2217	3178	2935	3392
ENSG00000071564.16	870	814	1224	715	842	0	784	835	873	927	577	981	848	947	965	768	1121	908	1444	1299	1068	1571	1452	1559
ENSG00000071575.11	174	170	262	186	244	0	221	222	233	223	174	239	180	237	210	177	203	184	211	220	178	184	166	237
ENSG00000071626.16	1144	1094	1510	872	1248	0	1114	1092	1120	1208	695	1355	1114	1174	1134	1089	1304	1037	2027	1910	1530	2649	2296	2589
ENSG00000071655.18	1326.18	1349.03	1927.65	1166.13	1601.04	0	1393.54	1545.04	1596.93	1658.3	1048.97	1864.62	1505.73	1649.3	1669.74	1376.67	1752.35	1443.16	2378.93	2294.59	1747.43	2217.65	2043.75	2230.15
ENSG00000071677.1	0	0	0	0	0	0	0	0	0	0	0	0	0	0	0	0	0	0	0	0	0	0	0	0
ENSG00000071794.16	455	447	560	387	557	0	550	597	550	554	338	556	521	547	667	562	544	494	758	641	552	558	568	662
ENSG00000071859.15	648	650	952	567	742	0	758	765	781	826	517	808	774	832	835	747	884	725	1343	1262	1095	1949	1800	2016
ENSG00000071889.16	734	672	884	574	855	0	761	792	824	785	536	953	761	882	858	729	887	666	1236	1124	895	1174	1076	1153
ENSG00000071894.17	1712	1738	2106	1366	1911	0	1782	1802	1807	1896	1209	2023	1729	1848.97	1941	1596	2004	1637	2682	2669	2151	2760	2574	2746
ENSG00000071909.18	1	0	0	0	2	0	0	1	0	0	1	1	0	0	1	0	0	1	0	0	1	0	0	0
ENSG00000071967.12	2	2	2	0	0	0	3	0	3	2	0	0	2	0	1	0	2	4	1	4	2	0	2	3
ENSG00000071991.9	0	0	0	0	0	0	0	1	0	0	0	0	0	0	0	0	0	0	0	0	0	0	0	0
ENSG00000071994.11	494	471	615	408	590	0	574	502	582	599	361	584	489	555	644	517	655	566	826	822	660	920	871	911
ENSG00000072041.17	0	1	0	0	0	0	0	0	0	0	2	0	0	0	0	0	0	0	0	1	0	3	4	2
ENSG00000072042.13	2531.8	2655	3517.78	2186	3424.54	0	3380	3354.65	3240.9	3217.08	2131	3630.9	3068	3289	3415.91	2800.87	3060.1	2868.67	3944.12	3867.71	3096.84	4029.47	3672	4052.5
ENSG00000072062.14	1335	1324	1799	1071	1574	0	1415	1434	1461	1413	989	1713	1319	1511	1531	1272	1556	1300	1999	1882	1411	1870	1564	1839
ENSG00000072071.16	645	660	854	530	718	0	690	680	717	724	469	756	660	788	754	587	785	593	998	934	706	862	849	934.86
ENSG00000072080.11	3	0	0	2	1	0	0	5	0	4	2	1	3	3	0	0	0	0	0	0	2	0	0	0
ENSG00000072110.13	2435	2267	3214.41	1630	2324	0	2072	2111	2393	2382.01	1425	2420	2322	2364	2794.01	2226	2456	2303	3286.01	3032	2551	4834	4730	5156.01
ENSG00000072121.16	1036	975	1339	780	1172	0	1166	1130	1175	1142	731	1107	1103	1172	1224	974	1178	1051	1670	1468	1225	1798	1745	1872
ENSG00000072133.11	191	173	240	159	245	0	233	235	239	176	113	283	199	201	205	221	229	181	339	245	240	242	253	256
ENSG00000072134.15	189	239	295	166	273	0	259	233	225	220	166	295	251	256	274	240	272	255	399	377	306	415	321	408
ENSG00000072135.13	489	473	673	376	668	0	583	599	546	565	363	626	499	596	591	544	696	579	869	907	735	1027	924	1022
ENSG00000072163.19	51	56	71	38	54	0	56	61	51	59	35	65	60	42	49	41	47	43	66	41	47	109	84	86
ENSG00000072182.12	3	1	6	1	4	0	4	4	2	5	2	1	5	2	3	2	7	6	4	7	1	3	3	1
ENSG00000072195.15	61	52	65	26	36	0	29	21	37	31	22	35	41	36	43	34	24	39	69	55	49	169	160	195
ENSG00000072201.14	129	134	189	126	157	0	150	151	181	139	92	151	146	140	193	139	151	132	254	204	185	241	227	269
ENSG00000072210.19	5404	4974	7022	4336	6163	0	5566	5653	6031	6419	4036	6409	6317	6818	7401	6532	7449	6835	9741	9949	7814	4653	3973	4364
ENSG00000072274.13	572	536	806	515	745	0	681	662	747	766	501	701	684	784	799	800	742	735	1187	1194	1037	1667	1575	1947
ENSG00000072310.17	2618	2487	3339	2244	3193	0	3042	3061	2894	2878	1979	3550	2598	2705	2648	1770	2187	1825	2089	2235	1633	1473	1332	1376
ENSG00000072315.3	0	3	0	1	1	0	5	1	2	5	1	2	2	3	2	2	2	3	3	2	0	0	0	0
ENSG00000072364.13	2071	1588	2575	1556	1976	0	1823	1766	2003	2032	1253	1899	2102	2239	2459	1992	2174	1984	2962	2888	2586	3814	4406	4758
ENSG00000072401.15	418	395	508	302	406	0	396	403	398	469	283	434	388	428	536	405	475	422	607	564	453	658	587	654
ENSG00000072415.9	582	536	763	480	787	0	677	649	659	666	394	715	655	683	767	686	699	618	898	812	717	828	877	988
ENSG00000072422.17	530	447	706	413	516	0	516	480	556	531	339	567	543	569	684	520	597	556	850	779	658	1295	1296	1495
ENSG00000072501.17	691	672	850	518	735	0	710	656	706	728	441	744	762	754	787	688	668	677	1027	909	789	1136	1147	1229
ENSG00000072506.12	335	364	451	270	416	0	413	417	408	389	236	422	370	414	431	367	377	363	511	503	342	541	460	496
ENSG00000072518.20	782	736	1067	573	815	0	797	792	818	864	546	893	756	875	931	711	824	744	1223	1191	887	1304	1214	1362
ENSG00000072571.20	29	20	45	21	28	0	37	45	46	34	20	21	33	36	59	36	17	19	31	37	23	31	26	35
ENSG00000072609.17	544	537	792	494.06	625	0	627	632	627	621	362	638.08	635	676	641	529	642	586	986	991	758.03	985	1007	1135.04
ENSG00000072657.9	1	6	2	8	7	0	2	4	1	1	0	4	3	3	3	1	2	2	9	2	8	1	3	8
ENSG00000072682.18	962	870	1262	737	1068	0	957	1054	1044	993	663	1065	1063	1054	1207	1036	1190	988	1757	1581	1297	2418	2374	2493
ENSG00000072694.20	1	0	0	2	1	0	1	0	1	2	0	2	0	1	1	1	5	0	1	0	1	0	1	0
ENSG00000072736.19	642.87	566.99	824.32	463.82	857.17	0	722.53	699.24	679.33	741.3	506.33	829.82	727.34	751.47	834.74	697.63	690.97	706.59	1020.9	990.74	815.65	919.65	892.97	1096.26
ENSG00000072756.17	213	178	228	136	217	0	188	185	209	208	134	230	192	220	227	215	245	208	313	295	267	338	336	317
ENSG00000072778.20	3802	3720	5142	3181	4620	0	4220	4355	4522	4441	2968	4919	4288	4591	4707	4170	5069	4305	6641	6721	5433	7284	6475	7532
ENSG00000072786.13	331	275	395	218	250	0	254	227	244	288	183	286	250	302	323	270	276	229	421	399	308	880	901	901
ENSG00000072803.17	983	923	1304	762	1078	0	974	966	1051	1015	685	1084	1099	1096	1243	1051	1089	1028	1407	1353	1152	1650	1632	1807
ENSG00000072818.12	5	7	4	3	7	0	7	6	6	4	4	5	6	5	3	2	4	2	8	11	4	7	5	3
ENSG00000072832.15	2	1	2	6	1	0	2	2	2	6	8	5	2	4	1	0	7	5	4	10	2	6	8	5
ENSG00000072840.13	564	565	808	512	690	0	617	689	621	601	472	699	667	637	682	564	677	551	902	854	674	524	493	527
ENSG00000072849.11	593	563	766	463	727	0	702	726	633	733	468	737	630	695	737	621	701	695	969	902	777	905	883	1036
ENSG00000072858.10	0	0	0	0	0	0	0	0	0	0	0	0	0	0	0	0	0	0	0	0	0	0	0	0
ENSG00000072864.15	78	102	128	79	101	0	85	83	95	118	66	106	93	84	108	87	105	86	155	145	129	252	284	265
ENSG00000072952.18	42	49	35	37	56	0	51	48	64	58	29	57	51	49	48	48	56	53	45	52	51	25	21	20
ENSG00000072954.7	127	155	189	86	164	0	192	144	181	129	84	160	145	145	185	121	144	155	203	232	156	266	227	229
ENSG00000072958.8	1305	1319	1818	1103	1727	0	1492	1577	1543	1624	1029	1669	1447	1684	1644	1491	1627	1452	2266	2057	1676	1947	1748	2058
ENSG00000073008.15	3067.84	2930.83	4125.45	2350.88	3356.74	0	2982.64	3210.48	3165.59	3309.94	2081.5	3496.8	3193.79	3462.81	3599.9	2953.89	3436.78	3033.45	4884.47	4947.28	3768.74	5971.6	5601.73	6137.66
ENSG00000073050.11	192	194	304	174	204	0	167	205	211	221	143.96	222	202	201	218.08	203	256	216	344	367	231	380	341	362
ENSG00000073060.16	3150	3209	4441	2876	4159	0	4002	3905	3845	3848	2529	4424	3418	3638	4071	3167	3754	3189	4757	4486	3460	2263	1929	2146
ENSG00000073067.14	12	11	12	6	4	0	4	3	9	8	6	16	9	11	10	1	9	6	10	8	7	1	1	1
ENSG00000073111.14	142	108	197	105	147	0	130	126	121	143	87	146	125	142	147	152	126	101	208	189	154	221	193	235
ENSG00000073146.16	2	1	3	1	1	0	2	0	0	1	0	3	0	4	2	3	2	6	4	3	3	10	13	23
ENSG00000073150.14	70	83	109	48	78	0	76	87	72	91	60	85	87	102	122	109	129	106	170	191	151	497	456	492
ENSG00000073169.14	573	620	754	524	705	0	619	664	619	669	483	758	625	676	723	584	686	584	912	948	712	492	398	428
ENSG00000073282.13	1	0	0	0	0	0	0	1	1	0	0	0	1	0	1	2	2	1	0	0	0	2	1	1
ENSG00000073331.18	66	96	140	62	120	0	94	59	96	101	56	98	96	101	105	97	100	93	137	159	130	246	241	261
ENSG00000073350.13	1453	1501	1976	1204	1616	0	1614	1647	1604	1747	1108	1897	1599	1748	1687	1436	1785	1507	2513	2562	1944	2067	1787	1925
ENSG00000073417.15	601	632	825	472	672	0	757	692	689	641	439	758	631	727	733	653	822	775	1047	1088	932	1101	1047	1247
ENSG00000073464.12	308	252	334	198	281	0	243	218	257	297	174	249	271	285	310	266	269	257	359	377	273	579	525	650
ENSG00000073536.18	177	160	209	122	169	0	168	178	175	185	89	185	158	162	225	219	208	157	295	295	238	340	303	319
ENSG00000073578.17	2169.88	2224.84	3071.53	1856.74	2865.19	0	2792.5	2761.6	2671.61	2678.27	1821.12	2935.22	2665.38	2817.13	2866.43	2503.99	2788.74	2455.07	3665.54	3394.33	2732.03	2911.66	2741.39	3068.08
ENSG00000073584.20	1434	1365.83	1918.18	1151.9	1608.12	0	1654.37	1581.87	1549.17	1657	1028	1659.09	1608.32	1717.56	1906	1554.99	1758.53	1557	2357.53	2164	1871.87	2118	1910	2122
ENSG00000073598.6	0	0	0	0	0	0	0	0	0	0	0	0	0	0	0	0	1	2	0	0	1	0	0	0
ENSG00000073605.18	465	493	672	454	666	0	646	636	591	566	447	667	539	554	509	533	619	521	701	871	667	602	495	593
ENSG00000073614.13	791	709	969	541	867	0	742	761	815	829	480	839	798	840	921	759	879	758	1037	1077	864	1028	1078	1151
ENSG00000073670.14	18	16	23	20	24	0	21	19	16	22	7	22	14	22	10	12	16	18	15	19	18	4	3	5
ENSG00000073711.11	207	198	306	183	232	0	235	223	238	240	125	223	203	232	243	237	215	165	280	287	259	316	314	337
ENSG00000073712.15	1183	1219	1603	842	1312	0	1332	1190	1281	1236	835	1281	1354	1300	1482	1211	1359	1199	1683	1605	1282	1590	1634	1867
ENSG00000073734.10	1214	1292	1793	1222	1916	0	1878	1909	1671	1719	1202	1902	1917	2052	1927	1907	2067	1879	2711	2840	2355	1022	936	1119
ENSG00000073737.16	0	0	0	0	2	0	0	0	0	0	0	0	0	0	0	0	0	0	1	0	0	4	9	6
ENSG00000073754.6	0	0	0	0	0	0	0	0	0	0	0	0	0	0	0	0	0	0	0	0	0	0	0	0
ENSG00000073756.12	0	0	1	0	0	0	0	0	0	0	0	1	2	0	2	0	1	0	1	1	2	2	0	4
ENSG00000073792.15	1959	2008	2735	1615	2260	0	2178	2269	2210	2201	1496	2424	2240	2412	2386	2185	2459	2271	3269	3185	2799	3138	3082	3402
ENSG00000073803.14	456	406	525	365	541	0	578	551	520	494	344	527	492	495	528	455	535	480	686	712	547	650	667	692
ENSG00000073849.15	3122	3201	4256	2979	4607	0	4662	4413	4241	4338	2900	4800	3886	4104	4290	3412	3728	3439	4313	3990	3329	2378	2296	2643
ENSG00000073861.3	0	0	0	0	0	0	0	0	0	0	0	0	0	0	0	0	1	1	0	0	0	0	0	0
ENSG00000073905.8	6.11	9.16	15.34	12.11	4.1	0	6.1	7.12	15.33	12.19	11.27	11.22	10.12	21.32	9.14	12.21	15.4	2.03	15.18	25.46	8.08	21.43	8.16	30.8
ENSG00000073910.22	175	153	224	144	225	0	208	189	197	191	133	212	145	166	230	167	170	137	208	199	178	172	133	140
ENSG00000073921.18	1993	1946	2556	1597	2363	0	2265	2234	2173	2407	1515	2232	2149	2341	2513	2137	2462	2154	3067	2938	2437	3441	3665	3854
ENSG00000073969.18	624.4	687.7	894.72	554.36	867.97	0	850.13	828.59	830.31	799.73	526	827.39	744.61	817.75	948.72	712.78	794.66	797.94	1067.47	1015.78	847.97	1112.25	1003.59	1249.2
ENSG00000074047.21	1	0	0	0	0	0	0	1	0	0	0	1	0	0	1	0	0	1	1	0	0	0	0	0
ENSG00000074054.18	1297	1213	1605	1020	1423	0	1437	1319	1424	1394	896	1477	1317	1484	1431	1325	1463	1335	1862	1871	1583	1749	1598	1795
ENSG00000074071.14	577	594	793	528	738	0	657	672	751	675	473	821	612	713	744	664	770	653	1053	990	736	1181	948	1141
ENSG00000074181.9	44	29	41	24	35	0	28	22	33	21	25	30	25	32	33	42	38	46	55	48	52	102	117	99
ENSG00000074201.9	613	589	780	482	679	0	689	716	677	649	446	677	668	697	785	675	722	665	974	974	782	1131	996	1259
ENSG00000074211.14	9	14	25	7	15	0	11	18	8	7	8	15	11	13	9	7	16	9	30	25	13	53	69	79
ENSG00000074219.13	636	605	837	481	651	0	529	529	576	668	383	713	645	703	727	607	711	620	1137	1081	947	1740	1475	1530
ENSG00000074266.21	187	172	275	154	248	0	214	186	184	234	143	238	169	217	255	208	207	217	305	318	280	277	289	310
ENSG00000074276.10	50	54	55	36	59	0	65	58	50	63	34	60	41	65	60	44	61	35	67	68	30	155	98	138
ENSG00000074317.11	0	1	0	0	0	0	0	0	0	1	0	0	0	2	0	0	0	0	1	0	0	7	2	1
ENSG00000074319.13	788	720	974	590	925	0	870	767	780	851	537	925	802	825	930	860	850	851	1170	1156	891	1396	1374	1448
ENSG00000074356.17	936	877	1211	716	1116	0	1037	1025	1011	1016	690	1135	1000	1084	1124	890	1176	984	1479	1625	1313	1167	1271	1339
ENSG00000074370.18	3	3	4	9	4	0	0	8	6	10	4	9	9	6	4	2	9	12	6	8	6	58	74	63
ENSG00000074410.14	311	362	461	332	486	0	531	475	421	440	290	474	479	499	540	498	604	565	1029	989	762	2412	2332	2535
ENSG00000074416.14	843	624	920	472	584	0	476	484	660	664	408	649	632	653	758	557	646	605	1138	1004	816	6064	6394	6560
ENSG00000074527.12	577	510	726	439	535	0	429	475	500	539	362	475	533	567	692	469	635	546	746	697	618	1249	1332	1280
ENSG00000074582.14	330	328	407	267	398	0	349	366	366	345	211	407	322	342	385	375	383	411	536	491	464	501	431	492
ENSG00000074590.13	296	266	461	220	316	0	289	291	324	312	192	302	318	327	383	235	264	236	331	287	275	262	229	313
ENSG00000074603.19	414	433	634	368	584	0	480	482	487	500	292	474	512	493	599	494	540	518	674	676	531	598	700	672
ENSG00000074621.14	122	128	164	115	157	0	174	135	169	169	106	153	167	174	187	164	201	160	237	244	174	202	184	186
ENSG00000074657.13	641.93	569.92	778.99	469.99	669.95	0	647	644.99	650.97	617.94	415.98	632.98	585.98	662.93	648.91	615.96	656	600.99	962.87	986.94	814.97	1246.92	1187.88	1254.97
ENSG00000074660.16	35	47	63	31	68	0	52	75	53	36	28	58	44	48	38	71	54	53	80	91	56	65	48	50
ENSG00000074695.6	1554	1567	2128	1410	2128	0	1940	1984	1912	1886	1336	1999	1816	2064	2174	1762	2037	1824	2562	2549	2155	3703	3752	4406
ENSG00000074696.13	2810	2764	3669	2322	3590	0	3461	3203	3391	3396	2153	3606	3251	3474	3750	3137	3476	3177	4595	4285	3621	3284	3171	3513
ENSG00000074706.13	18	14	19	14	11	0	15	14	9.34	14	8	21	20	11	31	16.92	13	22	23	22	22	13	16	13
ENSG00000074755.15	989	981	1296	739	1133	0	1066	1044	1066	1051	714	1192	1092	1133	1194	967	1131	966	1612	1527	1293	1759	1741	1935
ENSG00000074771.4	0	0	0	0	0	0	0	0	0	0	0	0	0	0	0	0	0	0	0	0	0	0	0	0
ENSG00000074800.16	7985	7654	10580	6131	9338	0	8969	8644	8928	9184	5954	9485	9073	9560	10318	9442	10577	9495	16622	15345	12091	21365	19942	21721
ENSG00000074803.19	0	0	1	0	0	0	0	0	0	0	0	1.32	0	1	0	0	0	0	0	0	0	0	1	0
ENSG00000074842.7	762	680	1019	613	919	0	712	843	876	887	491	867	791	816	919	905	923	737	1224	1169	887	2151	2015	2310
ENSG00000074855.11	288	300	381	231	273	0	276	296	297	342	184	352	292	293	272	268	334	267	472	499	391	634	670	637
ENSG00000074935.14	192	185	307	197	227	0	215	236	221	213	133	241	233	225	293	258	310	280	356	490	343	261	286	299
ENSG00000074964.17	1263	1385	1696	1175	1647	0	1619	1670	1523	1574	1052	1699	1476	1617	1434	1283	1558	1190	1841	1879	1403	1355	1267	1401
ENSG00000074966.11	12	8	5	13	4	0	10	11	7	8	6	12	11	11	12	4	14	7	14	11	16	18	26	27
ENSG00000075035.10	0	0	0	0	0	0	0	0	0	0	0	0	0	0	0	0	0	1	0	0	0	0	0	0
ENSG00000075043.18	0	5	4	1	7	0	2	1	4	0	0	1	1	2	2	3	1	0	1	1	0	1	0	1
ENSG00000075073.15	0	0	0	0	0	0	0	0	1	0	0	0	0	0	0	0	0	0	0	1	0	0	0	0
ENSG00000075089.9	168	117	203	107	174	0	152	163	166	195	106	182	150	155	212	183	210	152	232	229	204	248	215	282
ENSG00000075131.10	25	21	27	18	21	0	20	21	37	19	17	31	26	34	41	28	29	31	45	32	27	44	46	52
ENSG00000075142.13	757	648	939	504	762	0	685	728	799	755	520	841	701	776	861	763	851	781	1027	998	839	1208	1172	1368
ENSG00000075151.20	1104	1000	1397	902	1267	0	1165	1124	1186	1182	837	1259	1204	1191	1321	1140	1341	1197	1947	1836	1567	1949	1950	2209
ENSG00000075188.9	127	151	186	120	174	0	187	169	164	171	123	159	198	172	211	180	210	161	235	215	196	184	185	225
ENSG00000075213.11	6	2	4	1	7	0	6	5	4	1	0	1	4	3	1	4	3	10	10	5	3	6	7	4
ENSG00000075218.19	34	15	32	18	23	0	17	15	20	35	7	19	23	24	27	21	25	19	23	30	18	10	18	15
ENSG00000075223.14	59	49	78	36	66	0	45	60	57	55	41	60	67	53	62	68	56	33	56	73	77	102	114	131
ENSG00000075234.17	1527	1639	2143	1443	2180	0	2082	2147	2090	1976	1302	2320	1918	2027	1972	1671	1961	1734	2534	2371	1943	1555	1398	1743
ENSG00000075239.14	627	741	881	587	999	0	978	910	872	889	579	972	823	873	950	784	957	844	1054	1102	819	941	873	968
ENSG00000075240.17	440	487	638	403	622	0	498	587	550	544	362	603	485	596	520	459	611	531	779	824	638	720	649	653
ENSG00000075275.16	526	559	835	454	550	0	520	536	579	552	377	580	613	624	656	615	731	603	1055	1002	760	1799	1922	1997
ENSG00000075290.8	1	1	1	3	2	0	1	1	1	2	8	2	0	2	5	1	2	0	3	1	4	1	0	2
ENSG00000075292.19	1403	1367	1766	1114	1679	0	1761	1564	1523	1778	1054	1703	1544	1720	1701	1508	1726	1542	2230	2260	1946	1890	1799	2009
ENSG00000075303.13	197	205	294	213	298	0	269	272	258	301	183	297	241	238	257	224	270	213	315	334	265	220	190	228
ENSG00000075336.12	184	211	276	155	228	0	219	228	242	241	148	256	222	260	258	223	242	211	373	403	297	382	342	424
ENSG00000075340.23	0	2	1	0	2	0	2	3	0	1	2	0	0	3	0	2	0	5	0	0	0	4	4	3
ENSG00000075388.4	0	0	0	0	0	0	0	0	0	0	0	0	0	0	0	0	0	0	0	0	0	0	0	0
ENSG00000075391.16	611	495	731	427	607	0	469	471	545	604	361	551	509	605	595	455	547	488	694	631	551	611	564	658
ENSG00000075399.14	401	437	529	351	462	0	437	471	462	470	311	494	445	475	440	385	538	406	623	595	526	515	518	532
ENSG00000075407.18	296.36	250.75	360.44	219.25	302.58	0	294.3	317.02	316.1	334.98	213.64	350.48	332.44	288.93	352.17	326.14	339.23	326.63	459.77	524.19	390.62	474.32	534.67	584.95
ENSG00000075413.18	1001	928	1263	813	1203	0	1032	1071	1080	1001	712	1236	1079	1096	1219	1095	1173	1033	1565	1714	1391	1510	1599	1750
ENSG00000075415.12	6178	6035	8270	5094	7871	0	7281	7402	7148	7462	4810	8078	6925	7401	7838	7025	7925	7040	10214	9613	8003	9090	8306	9604
ENSG00000075420.13	1923	1655	2364	1446	1849	0	1842	1633	1785	1943	1137	1968	1889	2015	2269	1800	1976	1693	2626	2416	2090	3252	3276	3644
ENSG00000075426.12	743	617	1017	501	738	0	584	612	708	716	429	763	727	751	766	672	748	666	1038	870	760	1235	1290	1409
ENSG00000075429.8	0	0	0	0	0	0	0	0	0	0	0	0	0	0	0	0	0	0	0	0	0	0	0	0
ENSG00000075461.6	22	23	15	15	15	0	14	7	7	12	8	14	18	15	21	21	14	15	37	12	23	57	31	50
ENSG00000075539.14	423	370	562	320	497	0	496	456	474	487	292	488	442	509	530	467	520	487	624	653	501	682	689	764
ENSG00000075568.17	1305	1270	1588	1100	1568	0	1468	1484	1443	1506	987	1597	1383	1524	1611	1507	1538	1397	2128	2010	1595	2485	2473	2773
ENSG00000075618.18	664	435	820	390	445	0	300	313	446	417	256	430	433	457	537	398	510	440	753	630	491	2627	2500	2769
ENSG00000075624.16	71066	66363	94040.2	53399	77342	1	72294	71306	74054.6	72280.2	47392.6	78904.6	72791	77339	81382	68807.1	79660	72047	108071	97788.6	78318.6	106794	95747	101995
ENSG00000075643.6	298	348	420	282	464	0	450	413	407	385	308	453	441	457	479	451	535	433	698	683	488	964	1003	1175
ENSG00000075651.16	438	373	616	287	458	0	399	403	429	462	297	442	472	427	488	425	419	495	646	583	535	1024	911	1031
ENSG00000075673.11	0	0	2	0	0	0	0	0	0	0	0	0	0	0	0	0	0	0	0	0	0	0	0	0
ENSG00000075702.18	70	65	82	45	39	0	41	42	63	52	42	50	47	43	68	38	63	57	87	85	52	87	80	109
ENSG00000075711.21	1073	1065	1398	957	1363	0	1305	1231	1243	1406	774	1388	1231	1196	1394	1209	1416	1133	1677	1767	1505	1445	1446	1562
ENSG00000075785.12	2335	2233	3216	2046	2781	0	2524	2592	2707	2676	1793	2911	2654	2833	3024	2621	3021	2647	4085	3989	3217	5595	5602	6148
ENSG00000075790.10	270.6	280	435	263	404	0	328	334	348	373.29	201	350.56	333	351	451	311	413	403	513	504.29	423	552	580	650
ENSG00000075826.17	213.2	246.9	332.8	178.65	262.65	0	227.84	255	239.19	239.8	176.72	258.33	206.8	251.27	259.45	209	245.29	224.43	286.11	317.14	268.42	123.57	126	142.1
ENSG00000075856.12	671	654	927	585	778	0	671	727	763	765	517	754	685	820	883	739	830	717	1140	1083	847	1071	991	1148
ENSG00000075884.14	0	0	1	1	1	0	0	1	0	5	5	0	2	0	0	7	1	4	2	0	1	0	1	0
ENSG00000075886.11	1	2	2	1	5	0	0	2	2	2	0	4	2	0	3	3	1	2	1	4	1	0	0	3
ENSG00000075891.21	0	0	2	0	0	0	0	0	0	0	0	1	0	1	0	2	0	0	0	0	0	0	2	1
ENSG00000075914.13	234	262	348	213	305	0	310	280	304	313	189	315	244	304	315	291	285	294	494	453	358	498	419	539
ENSG00000075945.13	355	343	486	273	421	0	414	427	403	427	260	402	462	411	492	409	462	427	638	636	481	592	554	661
ENSG00000075975.16	416	431	533	323	499	0	436	478	453	504	305	491	456	494	565	500	508	503	686	646	548	621	638	707
ENSG00000076003.5	139	100	194	95	145	0	120	123	109	143	91	103	119	143	156	136	158	121	212	220	206	247	234	231
ENSG00000076043.10	473	487	706	419	605	0	516.98	576	537	588	352	595.97	580	565	636	572	605	613	918	876	733.96	1179	1217.83	1394.77
ENSG00000076053.10	433	421	590.29	328	518	0	438.52	483	446.72	499	289	465.64	443	516.26	532.8	462	500	448	653.76	633.82	526.57	623	645.09	781.95
ENSG00000076067.13	828.02	740.38	1011.45	574	777.77	0	742.6	663.98	760.48	799.3	514.53	794.8	686.87	765.56	810.43	628.74	692.52	695.21	891.45	890.23	662.07	1127.32	1114.74	1151.18
ENSG00000076108.11	1875	1840	2354	1626	2212	0	2039	2091	2150	2094	1323	2164	1995	2167	2199	1852	2009	1885	2731	2623	2378	2819	2900	3257
ENSG00000076201.15	1615	1533	2088	1256	1631	0	1553	1590	1738	1760	1167	1880	1670	1899	1770	1562	1950	1683	2764	2732	2184	3001	2648	3131
ENSG00000076242.14	293	298	349	254	393	0	341	314	318	326	222	365	356	368	402	321	414	323	482	452	396	636	611	661
ENSG00000076248.10	483	506	608	437	690	0	596	628	616	607	396	669	593	549	607	524	554	527	696	697	554	408	298	333
ENSG00000076258.10	83	102	139	94	146	0	120	133	122	101	80	139	112	114	123	118	137	108	128	146	92	65	73	67
ENSG00000076321.11	546	557	720	481	615	0	612	585	578	639	379	660	563	566	684	558	625	584	763	796	664	506	468	477
ENSG00000076344.16	2	0	0	0	0	0	0	0	1	1	0	0	1	0	1	0	2	1	0	2	2	2	4	1
ENSG00000076351.13	1827	1828	2433	1490	2231	0	2289	2164	2046	2148	1437	2384	2251	2455	2405	2212	2403	2225	2991	3095	2546	1747	1758	1991
ENSG00000076356.7	442	366	522	298	415	0	417	412	434	441	297	488	478	462	509	396	494	430	717	610	579	1474	1407	1556
ENSG00000076382.17	157	134	202	128	184	0	170	187	203	196	102	180	139	147	168	158	190	158	200	195	145	99	92.44	99
ENSG00000076513.17	702	794	973	624	911	0	900	915	903	843	565	948	844	866	971	798	923	783	1074	1089	969	805	839	1040
ENSG00000076554.15	443	358.84	508.7	326.74	502	0	456.12	483.62	460	451	337.36	491.81	514	460	524	498	570.87	524.77	680.44	761	618.37	765.43	778.31	998
ENSG00000076555.15	307	393	541	313	540	0	509	506	420	433	336	542	429	455	434	414	457	388	495	563	391	186	166	178
ENSG00000076604.15	1653.98	1520	2219.99	1254	1651.99	0	1582.97	1581	1749.98	1719.97	1079.95	1857.97	1591.99	1744	1871.98	1562	1785	1638	2430	2292	1847	2683.97	2425.96	2702.99
ENSG00000076641.4	923	860	1163	837	1153	0	1119	1042	1103	1166	702	1206	1046	1105	1216	850	1051	933	1308	1197	1121	1124	1174	1237
ENSG00000076650.7	153	165	189	129	169	0	161	173	184	187	117	177	156	185	206	171	184	150	259	257	208	238	233	310
ENSG00000076662.10	111	87	126	107	153	0	124	148	125	121	85	135	136	121	123	100	151	126	170	181	113	151	164	197
ENSG00000076685.18	1548	1466	2060	1188	1685	0	1535	1573	1692	1599	1023	1735	1504	1693	1840	1600	1689	1608	2179	2297	1926	2316	2344	2609
ENSG00000076706.17	52	42	122	35	52	0	37	39	56	62	35	45	46	57	82	53	44	50	82	72	74	178	173	208
ENSG00000076716.9	194	121	220	109	111	0	113	116	143	136	87	100	123	165	161	129	163	146	297	236	203	1658	1677	1974
ENSG00000076770.14	12227	12842	17395	12579	19974	0	19161	18947	17223	16549	11350	17965	15568	16365	17542	13168	15088	13017	15124	14845	12965	5372	4909	5475
ENSG00000076826.9	1546	1478	2069	1258	1559	0	1399	1505	1618	1678	1076	1946	1427	1719	1692	1361	1792	1473	2488	2483	1916	1948	1718	1899
ENSG00000076864.19	1060	946	1391	837	1082	0	986	1013	1093	1149	716	1126	1107	1097	1268	1133	1294	1158	2045	1852	1545	2326	2090	2227
ENSG00000076924.12	530	520	685	450	574	0	530	528	562	567	364	558	524	581	625	486	630	540	906	853	675	846	726	790
ENSG00000076928.17	889	701	1154	622	767	0	751	783	810	859	535	906	785	932	808	790	920	749	1287	1235	1086	2012	1810	2138
ENSG00000076944.16	796.58	833	1223	603	865	0	816	855.47	863	929.74	603	939	862	930	913	749	965	865	1413	1332	1069.13	1742	1623	1758.26
ENSG00000076984.17	640	590	890	496	700	0	565	673	690	747	399	749	564	669	739	606	742	616	1038	985	791	1166	990	1135
ENSG00000077009.13	0	0	0	0	0	0	0	0	0	0	0	0	0	0	0	0	2	0	1	0	0	1	0	1
ENSG00000077044.10	406	405	532	334	478	0	436	446	419	438	306	536	440	490	520	490	528	436	741	656	615	954	1019	1015
ENSG00000077063.11	11	14	18	15	11	0	16	13	17	14	10	12	19	7	10	16	11	21	12	18	15	12	12	18
ENSG00000077080.10	0	0	0	0	0	0	0	0	0	0	0	0	0	0	0	1	0	0	0	0	1	0	0	0
ENSG00000077092.19	267	207	337	199	234	0	260	212	270	270	146	239	245	240	318	216	271	257	315	349	293	487	425	494
ENSG00000077097.15	1242	1123	1596	960	1346	0	1338	1284	1352	1318	834	1324	1320	1414	1505	1239	1405	1239	1728	1719	1397	2096	2102	2287
ENSG00000077147.16	2447	2305	3241	1976	2872	0	2573	2618	2695	2724	1650	2789	2623	2881	3188	2711	3044	2757	3872	3661	3087	6606	6599	7596
ENSG00000077150.20	972	907	1224	652	921	0	835	821	908	853	556	1005	815	947	970	767	919	806	1193	1151	889	1518	1527	1652
ENSG00000077152.11	33	19	38	12	31	0	20	23	45	30	21	28	26	33	39	29	22	29	49	35	33	66	46	55
ENSG00000077157.22	342	322	481	323	373	0	338	318	364	356	233	349	370	366	363	297	354	343	461	547	484	402	409	465
ENSG00000077232.18	1501	1352	1986	1189	1687	0	1709	1536	1687	1666	1102	1700	1680	1686	1864	1554	1757	1781	2735	2564	2091.03	4544	4540	5215
ENSG00000077235.18	1476	1340	1916	1159	1424	0	1594	1521	1535	1596	966	1602	1431	1629	1643	1350	1569	1308	2163	1920	1685	2240	2205	2314
ENSG00000077238.14	1412	1347	1867	1058	1484	0	1508	1437	1412	1423	950	1604	1355	1536	1525	1340	1535	1242	1990	1910	1599	2459	2485	2660
ENSG00000077254.14	648	659	845	519	733	0	711	705	720	748	438	755	735	826	840	758	749	738	945	1062	857	962	813	967
ENSG00000077264.15	203	236	258	174	226	0	231	229	230	278	155	242	228	238	246	196	217	197	326	302	246	143	132	135
ENSG00000077274.9	18	12	25	19	22	0	22	17	24	16	11	28	14	23	21	24	19	16	23	15	22	14	10	8
ENSG00000077279.18	7	7	2	2	13	0	9	11	5	9	11	12	4	7	2	1	8	8	11	12	8	3	2	2
ENSG00000077312.9	249	250	343	190	322	0	262	226	279	287	201	276	232	252	280	198	301	258	346	350	299	389	291	331
ENSG00000077327.16	1	1	8	4	0	0	3	0	0	2	1	3	0	1	1	3	2	2	0	2	5	6	3	5
ENSG00000077348.9	50	36	54	40	48	0	34	45	65	39	20	45	37	55	46	40	38	45	81	78	66	113	105	141
ENSG00000077380.15	1236.72	1086.84	1577.46	930.43	1413.47	0	1289.52	1225.62	1264.52	1438.69	889.48	1344.05	1341.72	1399.11	1655.97	1421.87	1503.17	1443.68	2056.05	1955.4	1575.31	2067.97	2177.23	2281.86
ENSG00000077420.16	301	263	430	259	379	0	332	319	359	316	209	320	313	363	398	315	360	299	440	399	354	404	410	497
ENSG00000077454.16	1041.69	986.96	1385.18	800.93	1098.17	2	932.99	1028.42	1066.72	1015.64	762.77	1256.52	961.92	1119.59	1010.3	926.77	1078.37	901.58	1490.41	1514.26	1096.53	1364.93	1206.29	1381.19
ENSG00000077458.13	273	284	386	221	380	0	339	353	297	297	174	361	297	296	301	278	306	349	379	416	375	255	258	292
ENSG00000077463.15	249	215	323	155	222	0	220	223	239	250	152	251	254	245	273	246	274	226	407	397	315	604	484	523
ENSG00000077498.9	0	0	0	0	0	0	0	0	0	0	0	0	0	0	0	0	0	0	0	0	0	0	0	0
ENSG00000077514.9	140	116	162	104	174	0	140	135	131	145	81	110	128	137	130	132	152	131	214	201	153	250	243	263
ENSG00000077522.13	0	3	0	1	1	0	1	1	1	0	0	1	0	2	0	1	0	5	2	2	3	1	2	3
ENSG00000077549.18	2318	2177	2931	1862	2822	0	2501	2596	2666	2474	1633	2717	2447	2705	2920	2467	2792	2509	3668	3446	2769	3573	3284	3651
ENSG00000077585.14	27	37	53	34	42	0	35	25	31	35	25	33	39	46	36	45	41	56	69	50	44	122	131	136
ENSG00000077616.11	194	194	280	196	308	0	295	272	254	267	162	303	235	251	229	241	219	247	301	296	299	198	171	217
ENSG00000077684.16	628	632	887	553	710	0	656	621	667	719	429	691	649	735	800	661	734	659	946	977	827	572	550	629
ENSG00000077713.19	175	177	235	171	249	0	238	235	225	242	131	273	204	269	250	203	234	244	354	302	250	283	274	329
ENSG00000077721.16	753	623	992	555	861	0	713	733	746	815	510	818	753	816	900	783	934	819	1134	1115	900	1138	1089	1211
ENSG00000077782.20	321	274	396	248	314	0	266	292	286	320	177	352	319	340	326	327	315	328	549	532	479	693	674	785
ENSG00000077800.13	0	2	2	1	0	0	0	0	0	0	2	0	0	0	0	0	0	0	0	2	0	0	1	1
ENSG00000077935.17	0	0	0	1	0	0	0	0	0	0	1	0	0	0	0	0	0	0	0	0	0	0	1	0
ENSG00000077942.19	628	495	870	474	616	0	650	639	620	592	384	696	539	669	695	523	651	532	851	823	605	669	613	723
ENSG00000077943.8	3	4	5	3	7	0	4	7	6	3	2	2	5	11	3	4	4	4	5	3	5	5	6	3
ENSG00000077984.6	0	0	0	0	0	0	0	0	0	0	0	0	0	0	0	0	0	0	0	0	0	0	0	0
ENSG00000078018.19	263	228	337	146	253	0	192	181	223	232	136	249	239	284	308	321	308	304	654	686	553	2003	2111	2202
ENSG00000078043.16	115	118	197	99	153	0	157	133	135	148	108	160	164	164	196	152	179	166	290	264	220	264	269	311
ENSG00000078053.17	0	1	0	0	0	0	0	0	0	1	0	0	1	0	0	0	1	0	0	1	0	0	0	1
ENSG00000078061.13	1010	947	1275	790	1221	0	1226	1133	1173	1176	831	1277	1159	1251	1253	1137	1280	1036	1788	1724	1324	1925	1816	1881
ENSG00000078070.13	409	420	570	327	591	0	517	513	456	523	334	553	488	514	592	442	530	462	665	678	548	493	507	532
ENSG00000078081.8	18	20	30	18	23	0	16	24	21	13	19	24	18	31	28	42	42	53	88	90	65	1009	1087	1161
ENSG00000078098.14	0	5	2	1	0	0	0	1	0	0	1	0	2	0	0	0	1	0	3	1	1	3	0	0
ENSG00000078114.18	375	356	496	301	447	0	424	423	413	422	255	450	431	512	509	528	556	478	855	764	643	1336	1543	1570
ENSG00000078124.12	468	358	531	386	509	0	454	440	458	481	320	464	502	527	538	462	540	535	683	729	643	808	740	811
ENSG00000078140.14	1301	1244	1746	1101	1776	0	1569	1449	1516	1577	1001	1744	1564	1647	1705	1503	1684	1531	2149	2186	1913	2280	2245	2567
ENSG00000078142.13	336	318	464	293	450	0	394	392	390	434	270	394	409	395	428	385	389	347	586	607	443	545	570	649
ENSG00000078177.14	652	675	917	537	807	0	858	832	796	814	527	756	816	871	978	755	813	695	961	940	929	1051	1207	1227
ENSG00000078237.7	477.86	400	583.31	267.35	491	0	472	369.35	495	467.5	304	467.42	400.44	397.25	499.42	446	499	428.17	678	703	533.87	583.42	553.01	514.81
ENSG00000078246.17	299	279	396	251	322	0	334	337	322	300	218	346	296	317	347	284	342	302	455	542	433	558	612	735
ENSG00000078269.15	1038	1040	1317	831	1236	0	1105	1130	1123	1220	724	1217	1174	1272	1261	1100	1280	1176	1935	1808	1549	2004	1948	2079
ENSG00000078295.17	0	1	0	0	0	0	0	0	2	1	0	0	1	1	1	0	1	0	3	0	5	2	0	3
ENSG00000078304.19	916.86	858	1237.83	726.8	1194.75	0	1076.86	1024	1037	1026.95	718.92	1092.72	904.84	1033.94	1087.86	980.68	1027.78	951.85	1284.69	1241.95	1111.63	1231.92	1169.96	1411.89
ENSG00000078319.9	49	42.69	56	30.67	63.08	0	41.78	45	41	57.43	26	44	30	45.68	71	53	42	51	85.53	65	42	81.26	74	98
ENSG00000078328.21	0	1	0	1	0	0	2	0	0	0	0	0	1	0	0	1	1	0	3	1	1	1	0	1
ENSG00000078369.18	4761	4231	6078	3558	5066	0	4687	4594	4603	4995	3249	5150	4700	5075	5492	4773	5341	4923	7409	7041	5855	8573	8287	9091
ENSG00000078399.18	0	0	0	0	0	0	0	0	0	0	0	0	0	0	0	0	2	0	0	0	0	0	0	0
ENSG00000078401.7	42	36	51	21	38	0	30	30	41	32	27	52	25	47	42	25	42	29	34	20	17	23	13	17
ENSG00000078403.17	521	530	695	449	663	0	623	625	616	681	396	688	580	668	650	610	649	620	955	912	826	773	878	988
ENSG00000078487.17	19	20	25	18	12	0	21	21	23	24	24	25	25	29	18	25	28	21	41	30	27	55	32	42
ENSG00000078549.14	0	0	0	0	0	0	0	1	0	0	0	0	2	0	0	0	2	0	0	0	0	4	3	4
ENSG00000078579.9	0	0	0	0	0	0	2	0	0	0	0	0	0	0	0	0	0	0	0	0	0	0	0	0
ENSG00000078589.13	0	0	0	0	0	0	0	0	0	0	0	0	0	0	0	0	0	0	0	0	0	1	0	0
ENSG00000078596.11	3	3	5	5	6	0	3	6	9	12	4	5	4	2	6	9	8	6	5	6	7	5	4	8
ENSG00000078618.21	2199	2226	2952	1941	2939	0	2866	2762	2625	2816	1760	2910	2509	2797	2790	2364	2742	2407	3377	3396	2901	3088	3091	3359
ENSG00000078668.14	977	896	1361	851	1259	0	1132	1145	1156	1287	742	1252	1071	1260	1287	1220	1251	1194	1704	1637	1397	1673	1623	1841
ENSG00000078674.17	1557	1482	2006	1288	1903	0	1839	1614	1725	1777	1075	1838	1661	1812	1972	1654	1730	1675	2460	2407	1985	2568	2604	2779
ENSG00000078687.17	385	376	560	316	459	0	432	430	469	463	315	476	443	485	570	407	441	408	656	615	515	510	496	562
ENSG00000078699.21	392	409	588	348	535	0	496	475	479	478	322	558	439	513	506	402	521	452	735	755	625	689	620	713
ENSG00000078725.13	13	4	13	9	18	0	8	8	5	7	6	8	10	7	17	9	13	4	12	6	1	2	2	6
ENSG00000078747.15	1181.59	990.68	1336.47	967.45	1375.47	0	1211.78	1171.49	1216.65	1210.42	794	1373.28	1236.99	1272	1312.81	1133.9	1336.7	1249.38	1713.63	1753.67	1504.52	1774.33	1841.5	2098.63
ENSG00000078795.16	0	0	1	0	0	0	0	0	0	0	0	0	0	3	1	0	0	0	1	0	0	0	0	0
ENSG00000078804.13	989	948	1237	862	1145	0	1182	1126	1014	1067	733	1260	914	980	992	717	875	805	1021	910	821	1325	1272	1394
ENSG00000078808.17	2677	2792	3718	2259	3200	0	3030	3050	3211	3007	2077	3542	2835	3288	3239	2630	3339	2840	4348	4152	3113	4457	4037	4445
ENSG00000078814.15	2	3	5	4	9	0	8	7	8	8	3	6	5	3	3	5	4	1	5	9	6	6	3	7
ENSG00000078898.7	5	1	5	1	5	0	3	3	2	3	0	1	0	5	6	1	1	1	4	2	2	3	3	7
ENSG00000078900.15	0	0	1	0	0	0	0	0	0	0	0	0	1	3	0	2	4	1	3	0	5	1	1	0
ENSG00000078902.16	1606	1639	2286	1276	1839	0	1605	1795	1749	1826	1184	2034	1707	1993	1900	1624	1922	1608	2623	2397	1856	2128	1965	2180
ENSG00000078967.13	250	272	362	205	312	1	257	285	300	314	198	341	303	307	311	292	327	286	459	445	330	513	424	501
ENSG00000079101.16	15	24	30	16	11	0	24	20	16	26	10	30	22	29	32	20	26	22	14	36	13	9	10	9
ENSG00000079102.16	1	2	2	1	3	0	1	2	1	2	3	5	3	1	0	0	3	2	2	6	2	0	1	0
ENSG00000079112.10	19	11	13	11	23	0	15	19	15	10	13	19	14	24	12	11	14	22	18	10	8	13	11	14
ENSG00000079134.12	371	359	478	294	417	0	410	354	386	433	252	431	405	400	408	380	424	439	545	626	485	463	443	570
ENSG00000079150.18	57	55	87	61	86	0	65	82	79	77	28	62	79	74	88	69	78	61	82	93	82	76	56	90
ENSG00000079156.17	145	150	209	107	178	0	191	179	162	153	112	154	181	180	179	158	206	169	213	249	173	117	123	142
ENSG00000079215.14	93	84	125	80	100	0	95	107	104	134	67	110	78	98	128	93	87	79	90	100	85	24	29	30
ENSG00000079246.16	2553	2383	3364	1939	2895	0	2708	2752	2687	2817	1817	2796	2775	2861	3336	2694	3085	2718	4218	3943	3181	4659	4623	5131
ENSG00000079257.8	43	32	46	26	58	0	42	40	41	38	35	36	49	42	48	31	74	38	59	52	43	69	71	54
ENSG00000079263.19	4.06	5.09	3.12	3.02	4.08	0	5.16	6.04	5.19	8.24	4.21	6.24	5.09	3.09	7.31	2.14	1.02	5.33	8.26	3.15	7.08	12.33	29.55	26.42
ENSG00000079277.21	703	784	1000	616	913	0	869	791	751	829	584	865	867	826	808	697	845	758	1103	1295	964	803	759	872
ENSG00000079308.19	548	638	742	499	755	0	660	721	645	620	458	707	618	668	672	565	623	513	847	788	600	662	801	751
ENSG00000079313.15	683	636	914	557	671	0	657	644	728	716	432	775	601	750	686	598	745	601	1100	1042	820	1137	1149	1273
ENSG00000079332.15	1143	1175	1638	1052	1502	0	1318	1271	1323	1297	829	1431	1283	1449	1537	1302	1522	1381	1805	1759	1556	1810	1898	2108
ENSG00000079335.20	127	118	171	95	128	0	84	120	115	130	72	118	115	123	129	103	137	122	147	166	123	171	216	192
ENSG00000079337.16	3	9	16	9	6	0	12	13	12	9	5	15	14	14	13	11	15	9	21	13	15	104	131	107
ENSG00000079385.22	866	747	1085	620	798	0	804	751	802	947	558	903	950	952	1014	854	999	960	1496	1494	1133	2474	2459	2600
ENSG00000079387.14	244	214	289	199	253	0	234	254	237	267	141	249	258	291	288	254	237	247	323	336	296	394	400	468
ENSG00000079393.20	19	8	26	7	14	0	12	16	23	8	19	19	13	14	26	15	23	6	42	50	35	160	136	144
ENSG00000079432.7	2229	1871	2868	1711	2230	0	2145	2066	2355	2309	1386	2489	1931	2439	2222	1766	2177	1871	2902	2843	2131	2916	2730	2882
ENSG00000079435.10	19	18	29	16	28	0	24	18	28	28	16	15	28	25	19	21	21	22	43	45	37	84	99	66
ENSG00000079459.13	4197	4249	5537	3844	6106	0	6093	6103	5420	5389	3640	6531	5043	5238	5399	4169	4707	4226	5652	5625	4470	5368	4660	4759
ENSG00000079462.7	210	196	260	149	173	0	121	150	212	211	125	204	152	218	206	167	201	174	322	269	181	251	228	256
ENSG00000079482.13	104	96	122	70	110	0	111	93	99	104	71	110	85	106	93	98	102	127	182	138	164	208	176	241
ENSG00000079557.5	557	672	869	552	965	0	1072	1032	903	822	598	965	757	813	807	589	703	589	714	672	540	290	258	310
ENSG00000079616.12	143	93	188	99	116	0	109	135	127	142	93	130	123	117	173	142	152	121	191	153	123	172	164	152
ENSG00000079689.14	40	31	39	30	46	0	46	44	59	34	26	30	43	47	38	33	36	31	68	58	47	128	142	119
ENSG00000079691.18	258	237	379	166	351	0	222	268	269	307	160	307	296	359	309	272	311	252	411	419	388	515	466	512
ENSG00000079739.17	858	814	1177	740	1095	0	1050	1005	1042	1051	697	1067	1030	1063	1100	923	995	1029	1363	1278	957	1168	1112	1349
ENSG00000079785.15	874	890	1248	752	1205	0	1051	1071	1044	1066	675	1176	1032	1073	1136	984	1164	1200	1611	1545	1225	1453	1469	1745
ENSG00000079805.16	2636	2629	3447	2064	2977	0	2787	2762	2787	3000	1914	3177	2736	2988	3048	2664	3133	2761	4342	4111	3148	3784	3449	3772
ENSG00000079819.19	288	237	360	201	267	0	238	214	292	273	152	234	273	268	318	252	284	252	380	356	278	723	703	704
ENSG00000079841.18	0	0	1	0	0	0	2	1	0	1	0	0	1	1	1	2	0	0	0	3	1	8	5	8
ENSG00000079931.15	11	1	14	6	8	0	4	12	18	14	6	7	8	12	8	13	10	10	14	11	7	18	28	19
ENSG00000079950.14	1034	926	1342	703	1140	0	1028	906	1081	1095	721	1028	1014	1107	1215	1055	1146	1088	1601	1557	1298	1631	1526	1657
ENSG00000079974.17	312.07	272.34	408.93	207.95	338.61	0	260.09	268.09	291.29	371.6	163.36	319.01	289.54	307.58	316.91	336.02	326.47	289.26	454.41	510.85	427.59	447.99	438.89	495.74
ENSG00000079999.14	1051	1074	1412	882	1119	0	1049	1117	1151	1264	728	1263	1148	1319	1255	1236	1344	1119	1931	1869	1547	2075	1852	2064
ENSG00000080007.8	0	0	0	0	0	0	0	0	0	0	0	0	0	0	0	0	0	0	0	0	0	0	0	0
ENSG00000080031.10	226	200	260	170	236	0	204	226	203	223	158	228	243	227	258	254	288	234	403	381	326	770	800	876
ENSG00000080166.16	4	1	4	2	3	0	2	1	2	1	2	6	2	1	3	4	1	6	4	4	4	1	1	2
ENSG00000080189.15	603	583	812	516	746	0	674	627	652	652	463	755	639	697	720	653	783	651	1011	1003	797	1193	1129	1323
ENSG00000080200.10	161	168	231	124	213	0	200	202	180	194	155	167	174	193	160	158	185	183	249	234	207	383	382	420
ENSG00000080224.17	13	13	19	10	13	0	15	17	21	16	15	15	12	22	30	13	15	15	13	16	18	15	23	18
ENSG00000080293.9	0	0	0	0	0	0	0	1	0	0	2	0	0	0	1	0	1	0	3	0	0	0	0	0
ENSG00000080298.15	168	147	188	133	151	0	147	158	169	151	106	164	171	167	157	171	190	154	269	229	189	246	260	305
ENSG00000080345.18	667	613	903	554	825	0	821	696	720	759	485	743	716	765	930	722	801	774	1113	1079	930	1067	1067	1255
ENSG00000080371.6	811	707	1072	673	1018	0	882	912	904	978	610	939	906	986	1097	986	999	943	1264	1344	1102	1537	1529	1605
ENSG00000080493.17	110	107	136	93	78	0	76	94	92	116	53	89	128	124	165	116	116	105	195	170	143	304	363	311
ENSG00000080503.24	879	814	1201	760	1051	0	1047	967	988	1099	646	1007	999	1087	1155	996	1098	939	1395	1312	1198	1507	1468	1584
ENSG00000080511.5	0	0	0	0	0	0	0	0	0	0	0	0	0	0	0	0	0	0	0	0	0	0	0	0
ENSG00000080546.13	666	765	1014	624	946	0	931	888	927	801	616	929	793	937	997	814	904	815	1159	1065	922	555	495	559
ENSG00000080561.13	117	129	173	128	153	0	126	165	125	154	114	150	145	144	161	153	159	128	220	218	168	317	275	297
ENSG00000080572.12	0	0	0	0	0	0	2	0	0	0	0	0	0	0	0	0	0	0	0	0	0	0	0	0
ENSG00000080573.7	11	8	14	9	10	0	14	18	10	17	10	19	15	21	12	14	19	11	20	27	11	19	13	35
ENSG00000080603.17	1643.07	1519.49	2044.98	1412.16	1646.45	0	1692.57	1735.43	1610.38	1621.42	1106.26	1775	1555.16	1744.68	1717.63	1515.25	1700.64	1469.45	2225.49	2353.37	1815.63	1813.14	1924.43	2071.19
ENSG00000080608.10	258	205	375	190	298	0	228	236	249	252	135	288	273	258	261	277	315	321	443	403	386	490	509	527
ENSG00000080618.16	2182	2406	3134	2114	3413	0	3139	3097	2950	3044	2033	3227	2874	3023	3144	2581	2930	2685	3429	3311	2661	1428	1163	1440
ENSG00000080644.16	0	0	0	0	0	0	0	0	1	0	0	0	0	1	0	0	0	0	0	0	0	9	5	5
ENSG00000080709.15	4	5	0	2	0	0	1	1	2	3	1	3	1	3	0	3	2	1	4	2	6	18	9	9
ENSG00000080802.18	380	389	506	371	478	0	421	424	464	443	291	471	449	463	523	428	487	436	674	659	464	592	528	602
ENSG00000080815.19	1373	1236	1755	1119	1637	0	1464	1550	1501	1659	957	1590	1533	1612	1801	1540	1684	1551	2359	2173	1839	2705	2722	2921
ENSG00000080819.9	240	220	301	171	263	0	247	252	220	245	212	256	243	261	278	247	270	266	399	346	293	369	328	351
ENSG00000080822.17	550	526	689	395	630	0	562	552	633	576	383	644	565	634	671	621	633	587	849	838	686	910	1008	1017
ENSG00000080823.23	52	26	65	43	60	0	51	45	41	46	31	48	49	53	61	30	34	37	69	61	68	76	66	68
ENSG00000080824.18	15630.7	13616.4	19307.5	11390.8	17026.7	0	16091.9	15719.8	16033.6	17763.5	10752.8	17282.3	17777.6	18692.7	21024.7	19298.6	20839.6	19861.7	32176.6	30779.3	25637.5	33260.4	32019	36989.7
ENSG00000080839.12	49	47	77	42	50	0	51	59	63	60	44	47	58	57	85	51	60	60	78	92	71	77	81	128
ENSG00000080845.17	2069	1840	2559	1405	1849	0	1712	1650	1957	1862	1151	2080	1880	2066	2141	1686	2128	1888	3133	2942	2326	3806	3518	3738
ENSG00000080854.15	20	20	24	14	16	0	15	12	17	17	12	17	27	24	30	12	27	24	36	30	29	82	97	87
ENSG00000080910.13	11.13	23.12	24.27	11.38	16.47	0	28.32	25.41	24.13	34.35	12.11	30.4	22.12	29.54	28.08	16.52	16	18	18.75	21.97	16.13	9.14	9.06	7.09
ENSG00000080947.15	58.1	62.41	70.25	46	79.32	0	42.12	68.48	56.52	59	44	66.16	63.16	71.6	58	55.67	68.22	57.25	72.15	99.24	89.22	55.45	71	46.39
ENSG00000080986.13	15	10	18	3	12	0	4	4	10	11	8	6	11	14	18	11	10	20	8	13	8	4	5	6
ENSG00000081014.11	262	242	322	216	297	0	282	315	302	312	176	335	291	291	317	263	320	299	405	466	358	373	404	437
ENSG00000081019.13	215	241	327	185	267	0	240	216	269	277	160	271	275	271	273	241	276	229	346	360	275	341	342	393
ENSG00000081026.19	353	401	493	328	515	0	451	419	425	438	297	449	403	449	452	398	478	412	578	510	479	440	463	519
ENSG00000081041.9	279	332	432	205	339.88	0	330.89	281	289	307	204.74	304	234	272.93	230	208	233.46	181	205	200	155	418	339	407
ENSG00000081051.8	437648	427834	576514	363116	538701	2	494088	496046	500404	518486	321986	548019	479438	510887	568301	455486	505348	460545	577554	561255	466818	406912	373202	426753
ENSG00000081052.12	2	4	7	3	4	0	1	2	0	3	4	3	2	2	2	0	2	3	0	2	3	7	7	4
ENSG00000081059.20	74	97	101	45	76	0	88	93	80	80	53	89	84	102	75	81	109	69	106	107	93	218	184	250
ENSG00000081087.15	202	172	260	150	229	0	167	196	184	211	117	221	218	196	274	203	257	251	363	310	255	495	499	653
ENSG00000081138.14	1	2	1	5	3	0	2	2	2	2	3	5	0	3	4	2	6	6	3	6	6	3	2	1
ENSG00000081148.12	41	38	39	49	47	0	48	36	29	43	21	61	27	54	36	32	45	48	55	63	60	39	28	56
ENSG00000081154.12	1179	1065	1557	956	1343	0	1389	1317	1315	1429	865	1391	1391	1471	1575	1284.99	1535	1342.97	1929.99	1907	1551	1951	1930.99	2280
ENSG00000081177.18	404	378	526	345	518	0	483	457	428	495	310	483	444	445	493	400	519	472	637	615	532	943	858	1030
ENSG00000081181.8	199	180	231	123	198	0	177	189	211	217	157	203	234	225	262	238	305	255	533	472	389	1949	2028	2357
ENSG00000081189.15	9	3	22	6	6	0	7	3	6	14	4	9	13	7	9	11	11	14	20	20	4	19	8	17
ENSG00000081237.20	2	0	0	0	0	0	0	0	0	0	0	0	0	0	0	0	0	4	0	0	0	0	0	0
ENSG00000081248.11	0	0	0	1	0	0	0	0	0	0	0	2	0	0	1	1	0	0	0	1	1	3	4	0
ENSG00000081277.12	0	0	0	0	0	0	0	0	0	0	0	0	0	0	0	0	0	0	0	0	0	1	0	0
ENSG00000081307.12	635	630	877	571	831	0	774	782	748	728	497	772	673	874	773	784	832	720	988	1008	891	1167	1105	1392
ENSG00000081320.11	110	80	129	87	109	0	89	93	93	114	48	125	104	105	110	104	99	81	131	140	106	102	114	128
ENSG00000081377.17	434	413.98	586.98	338	547	0	508	500	449.93	526.97	351	520.99	524.98	520.98	529.94	504	568.92	552.96	722.99	767.98	643.89	676.98	659	719.95
ENSG00000081386.12	201	199	271	160	251	0	231	212	226	233	148	276	216	252	236	191	282	229	298	330	280	182	154	190
ENSG00000081479.15	29	24	31	11	37	0	28	39	38	36	17	31	25	24	31	23	39	16	46	40	34	19	31	21
ENSG00000081665.14	0	0	0	0	0	0	0	0	0	0	0	0	1	0	0	0	0	0	0	0	0	0	0	0
ENSG00000081692.12	288	255	355	188	266	0	297	308	221	304	186	319	301	317	329	295	332	338	507	506	361	629	671	667
ENSG00000081721.12	155	164	199	105	159	0	151	169	162	206	98	180	166	186	200	184	185	191	268	271	194	269	272	326
ENSG00000081760.17	554	499	742	518	649	0	641	628	603	609	442	670	561	657	694	566	574	544	901	884	712	919	894	1084
ENSG00000081791.9	669	693	852	512	848	0	761	776	741	762	510	900	861	815	748	787	847	748	1069	1148	925	960	911	905
ENSG00000081800.9	0	0	0	0	0	0	0	0	0	0	0	0	0	0	0	0	0	0	0	0	0	0	0	0
ENSG00000081803.16	346	376	457	308	427	0	418	389	399	416	236	437	356	410	459	397	425	410	519	464	417	542	524	654
ENSG00000081818.4	22	20	29	6	9.03	0	12.9	17	23.14	13.69	12	12.05	24	15.11	22.07	17	24.97	23	22.86	26.05	23.06	24	23.05	22
ENSG00000081842.18	7	5.96	5.98	1.69	5.06	0	0	1.75	3	2	5.99	11.09	8	6.13	3	2	2	6.06	8	8.6	10.65	2.01	1	10.62
ENSG00000081853.15	0	0	0	1.52	0	0	1.51	0	4	0	0	1	5.27	0	0	0	0	1.52	3.4	0	1.51	0	0	1.51
ENSG00000081870.11	146	140	169	129	187	0	192	180	200	180	106	196	208	172	188	208	180	170	251	230	233	247	257	287
ENSG00000081913.14	390	403	531	362	533	0	451	463	520	467	340	528	442	471	446	438	478	444	540	548	421	360	339	348
ENSG00000081923.14	508	508	623	439	646	0	646	561	572	608	430	617	625	689	655	637	701	582	939	957	779	982	979	1095
ENSG00000081985.11	1	2	0	0	1	0	0	0	0	3	0	0	1	1	0	2	0	1	5	0	2	6	0	0
ENSG00000082014.16	261	258	381	220	349	0	258	324	335	312	210	344	277	311	315	286	387	284	458	478	383	391	328	373
ENSG00000082068.9	254	266.78	378	207	333	0	303	289	284.6	290	186	316	295	325	376.61	310	361	270	424.6	432	333	349.63	311	412
ENSG00000082074.18	0	0	1	0	1	0	0	0	0	0	0	0	0	0	0	0	0	0	0	0	0	1	1	0
ENSG00000082126.18	6	1	6	1	4	0	3	7	6	1	2	4	1	5	4	3	2	3	1	4	3	3	0	1
ENSG00000082146.13	898.8	861.17	1156.64	777.68	1153.06	0	1122.03	1169.14	1089.81	1160.4	623.02	1100.53	1029.34	1113.67	1130.64	969.55	1066.82	1021.59	1356.59	1334.14	1071.37	1214.72	1118.71	1179.28
ENSG00000082153.18	2784.54	2653.51	3673.89	2142.21	3349.45	0	3115.32	3047.4	3043.39	3252.56	2027.16	3313.69	3036.07	3239.56	3535.72	3021.82	3248.06	3152.11	4258.24	4088.16	3354.89	5713.62	5843.46	6542.46
ENSG00000082175.15	0	0	0	0	0	0	0	3	0	0	0	0	0	0	0	0	0	0	0	0	0	0	2	1
ENSG00000082196.20	52.91	50.67	62.11	55.33	52.12	0	72.01	58.92	54.85	45.74	26.49	68.15	54.14	62.59	57.57	67	60.05	62.06	84.13	94	70.66	57.16	82	77.18
ENSG00000082212.13	668	671	817	573	912	0	832	844	834	802	522	870	740	791	796	709	749	735	1080	984	928	935	920	1035
ENSG00000082213.18	360	295	448	277	430	0	400	329	384	425	264	393	430	405	436	391	455	371	550	587	479	554	562	713
ENSG00000082258.13	902	829	1103	684	971	0	909	846	920	931	605	878	898	878	895	947	1027	871	1259	1216	1168	1204	1186	1334
ENSG00000082269.16	410	336	459	295	398	0	357	337	399	437	264	407	384	446	444	381	388	394	545	511	497	601	725	817
ENSG00000082293.13	2	2	5	5	3	0	5	1	5	2	0	5	5	0	4	5	3	2	0	6	3	8	1	4
ENSG00000082397.17	543	503	650	419	662	0	676	561	576	626	394	678	641	711	770	671	692	627	987	950	787	1290	1204	1397
ENSG00000082438.17	1106	1109	1468	1000	1452	0	1520	1340	1351	1402	921	1446	1273	1380	1525	1256	1375	1219	1677	1588	1511	1561	1468	1729
ENSG00000082458.12	406	402	556	317	431	0	495	452	483	512	326	481	381	492	519	415	508	404	654	671	542	859	827	811
ENSG00000082482.13	0	0	0	0	0	0	0	0	0	0	0	0	0	0	0	0	0	0	0	0	0	0	0	0
ENSG00000082497.12	0	0	0	0	0	0	0	0	0	0	0	0	0	0	0	0	0	0	0	0	1	0	0	0
ENSG00000082512.15	34	32	41	25	32	0	42	28	32	38	12	43	36	31	39	37	46	32	58	57	60	109	95	112
ENSG00000082515.18	321	318	444	262	385	0	416	351	383	376	280	419	349	365	422	358	417	331	531	482	441	473	429	481
ENSG00000082516.9	346	309	459	258	387	0	420	333	377	354	254	337	344	403	490	370	369	358	559	527	423	541	533	538
ENSG00000082556.12	527	474	687	451	680	0	561	611	595	627	407	690	563	649	648	578	600	537	819	791	684	654	580	639
ENSG00000082641.16	4138	4242	5759	3686	5411	0	4933	4980	4851	5023	3189	5408	4982	5316	5337	4729	5221	4737	7026	6593	5231	7477	7510	8090
ENSG00000082684.16	6	8	7	1	5	0	3	5	3	2	3	5	0	8	6	2	3	0	3	9	2	0	0	2
ENSG00000082701.15	1353	1311	1729	1163	1528	0	1393	1415	1536	1432	948	1521	1488	1621	1717	1278	1545	1387	1838	1840	1610	2096	2071	2190
ENSG00000082781.12	1603	1426	2034	1177	1666	0	1516	1556	1709	1771	1054	1798	1590	1732	1984	1568	1899	1573	2639	2404	2030	3281	2884	3160
ENSG00000082805.20	838	719	1061	649	868	1	810	839	809	797	589	971	802	925	937	805	855	737	1180	1165	983	1333	1408	1463
ENSG00000082898.17	1801	1666	2269	1425	2143	0	2045	1902	1956	2043	1281	1994	2051	2096	2275	2059	2265	2190	3258	3345	2777	3128	3267	3467
ENSG00000082929.8	0	0	0	0	0	0	0	0	0	0	0	0	0	0	0	0	0	0	0	0	0	0	0	0
ENSG00000082996.19	434	432	613	378	603	0	523	483	526	573	336	562	561	529	586	565	532	550	687	630	568	835	850	863
ENSG00000083067.22	15	14	15	17	14	0	22	19	17	23	15	11	24	17	17	15	22	17	29	20	20	4	5	6
ENSG00000083093.9	156	142	222	112	177	0	169	163	169	168	130	143	174	170	200	174	193	173	254	245	201	236	212	261
ENSG00000083097.14	417	456	649	385	519	0	484	493	464	484	323	504	542	495	581	479	529	455	762	730	675	533	547	583
ENSG00000083099.11	444	455	593	365	529	0	494	485	460	524	285	546	487	500	574	463	533	448	693	706.64	586	836	763	802
ENSG00000083123.15	294	288	431	254	397	0	373	431	343	347	229	408	333	364	436	309	361	314	400	400	322	230	210	285
ENSG00000083168.11	870	793	1032	750	988	0	885	911	971	941	610	973	873	989	1075	811	975	880	1282	1194	1123	1189	1333	1422
ENSG00000083223.18	560	542	712	399	587	0	593	585	608	618	369	636	604	627	675	603	668	570	961	909	694	1042	1016	1096
ENSG00000083290.20	401	405	512	376	527	0	511	459	464	479	314	514	495	490	542	451	530	429	654	687	588	540	524	592
ENSG00000083307.12	89	69	96	56	37	0	55	44	67	55	59	63	69	77	81	67	83	88	117	107	85	171	164	167
ENSG00000083312.17	2479	2293	3112	1893	2666	0	2577	2550	2696	2634	1708	2540	2619	2785	3087	2501	2672	2558	3698	3418	3049	3954	4245	4517
ENSG00000083444.17	2371	2337	3160	1768	2482	0	2395	2347	2440	2556	1671	2829	2598	2734	2859	2276	2676	2345	3626	3472	2723	3078	2713	3126
ENSG00000083454.22	15	18.46	21.36	10.38	20.07	0	14	25.22	13.68	18.32	13.27	19.2	15.02	12.35	6.35	11.22	16.21	14.65	17.74	30.89	22	12.65	9.82	12.75
ENSG00000083457.12	131	125	173	113	143	0	167	145	156	156	92	153	124	160	180	162	179	154	197	208	195	134	149	190
ENSG00000083520.15	572	520	721	437	724	0	590	604	647	731	397	704	687	702	752	627	690	638	922	893	746	992	1146	1285
ENSG00000083535.16	130	132	160	113	167	0	140	141	157	205	75	174	173	167	177	167	189	141	249	253	209	237	264	284
ENSG00000083544.14	192	193	260	130	210	0	169	157	190	153	120	180	172	220	209	179	178	198	292	288	248	238	261	310
ENSG00000083622.8	0	0	0	0	0	0	0	0	0	0	0	0	0	0	0	0	0	0	0	0	0	0	0	0
ENSG00000083635.8	117	116	150.95	76.9	106	0	110.82	131	134.69	106	68	112	113	154.98	138	141.95	173.88	140	188	196.91	132	189	166.98	196
ENSG00000083642.19	491	489	666	401	622	0	619	561	578	645	375	622	596	562	645	516	629	563	762	803	630	656	623	708
ENSG00000083720.13	40	33	43	26	55	0	27	33	45	38	21	45	37	43	31	40	39	47	66	60	35	215	223	275
ENSG00000083750.12	152	145	185	127	167	0	148	157	156	164	108	149	144	168	189	148	203	168	204	222	194	133	160	169
ENSG00000083782.8	0	0	0	0	0	0	0	0	0	0	0	0	0	0	0	0	0	0	0	0	0	0	0	0
ENSG00000083799.17	555	531	825	430	625	0	555	596	552	583	386	614	676	605	672	525	627	574	736	664	566	776	897	1036
ENSG00000083807.10	64	78	111	68	128	0	81	96	74	83	60	108	68	96	91	70	75	88	110	85	73	95	54	86
ENSG00000083812.12	117.82	111.1	145.14	88.61	94.23	0	98.56	91.54	114.35	119.56	95.34	145.98	126.7	118.89	130.62	125.28	128.84	120.98	183.76	181.28	143.36	180.25	162.16	182.79
ENSG00000083814.13	108	134	163	76	142	0	131	118	93	115	81	159	143	134	143	123	148	127	155	166	142	139	118	137
ENSG00000083817.9	81	82	107	69	91	0	100	76	102	96	65	115	80	83	94	103	113	97	133	116	112	107	95	103
ENSG00000083828.16	55.12	60	81.23	48	65	0	66	71.07	71	64	37	67.27	80.3	63.46	59	66	74	49	109	122.28	95.69	112	101.06	122.5
ENSG00000083838.16	88.94	80	116.43	60.03	88.86	0	95.74	93.49	88.34	87.51	75.56	103.26	116.18	92.35	100.49	72.45	101.17	89.46	137.61	151.28	100.07	132.73	136.84	146.51
ENSG00000083844.10	311	291	400	228	348	0	327	302	278	349	231	343	340	344	363	314	340	292	453	504	339	328	370	419
ENSG00000083845.9	2815	2767	3877	2062	3215	0	3162	2983	3119.82	2925.95	2033.89	3462	2991	3163	3498	2936	3434.99	2964.76	4663	4239	3380	6080.96	5339.92	6357.98
ENSG00000083857.14	5507	4583	6778	4081	5428	0	5012	4859	5624	5224	3407	5252	5495	6101	6612	5136	5856	5264	7929	7079	6270	8323	8882	8797
ENSG00000083896.12	979	945	1232	741	1214	0	1033	1055	1052	1091	698	1120	1037	1147	1201	1066	1199	1075	1444	1449	1229	1391	1420	1538
ENSG00000083937.9	406	387	564	338	532	0	419	504	487	554	317	495	440	480	626	483	497	555	729	694	548	1051	1021	1207
ENSG00000084070.12	475	484	704	407	678	0	662	567	591	637	439	691	565	668	686	542	631	554	806	781	620	773	675	766
ENSG00000084072.16	343	349	469	282	456	0	414	394.65	452	391	305	454	457	475	455	429	517	416	674	654.94	495	617	594	691
ENSG00000084073.9	764	730	968	620	970	0	884	884	887	819	576	976	758	878	1066	752	956	847	1292	1164	1018	1520	1502	1714
ENSG00000084090.13	1602	1513	2124	1329	1992	0	1824	1879	1882	1775	1307	1894	1909	1868	2066	1810	1928	1786	2545	2401	2038	2132	2006	2184
ENSG00000084092.7	328	279	433	273	387	0	335	362	345	377	239	457	402	392	404	332	430	332	605	562	409	575	526	571
ENSG00000084093.17	631	569	801	480	669	0	672	629	688	649	374	659	689	715	762	633	770	609	941	882	738	851	866	975
ENSG00000084110.11	7	14	13	11	3	0	9	8	10	15	6	18	10	16	9	7	11	16	19	17	25	89	90	88
ENSG00000084112.15	1358	1141	1743	976	1423	0	1229	1137	1280	1374	766	1381	1216	1373	1441	1114	1294	1167	1753	1775	1460	2260	2341	2378
ENSG00000084207.17	4115	3969	5714	3437	4977	0	4634	4817	4842	4690	3092	5314	4392	4941	5329	4553	5576	4663	7669	7154	5214	6866	5978	6491
ENSG00000084234.17	7640	7331	10505	6254	9010	3	7950	8334	8579	8700	5449	9080	8299	8939	9901	8102	9221	7872	11976	10737	8984	12504	11777	12828
ENSG00000084444.14	72	65	100	66	75	0	83	75	74	83	57	57	70	72	87	70	75	71	83	124	80	88	95	100
ENSG00000084453.16	4	13	3	11	13	0	3	15	5	5	6	12	1	9	11	15	7	10	16	12	16	5	12	6
ENSG00000084463.8	822	826	1099	644	963	0	882	907	889	960	588	1012	858	997	1135	877	1003	915	1263	1218	1097	1208	1103.99	1312
ENSG00000084623.11	1327	1189	1755	1082	1463	0	1354	1385	1447	1381	886	1596	1270	1415	1560	1294	1554	1343	2224	2029	1629	3047	2922	3230
ENSG00000084628.10	15	13	15	6	16	0	10	10	9	4	5	18	16	10	12	13	11	20	32	33	20	27	28	39
ENSG00000084636.18	19	32	41	21	33	0	28	37	26	23	13	26	24	33	31	24	58	45	75	93	76	156	119	168
ENSG00000084652.16	1517	1572	2023	1266	1779	0	1699	1761	1689	1702	1164	1854	1683	1765	1834	1568	1790	1511	2461	2335	1972	2686	2479	2713
ENSG00000084674.14	110963	113897	152133	106002	164156	3	163494	155712	145692	140510	96314	153588	142119	153982	159550	126970	139494	124787	166590	159613	133992	82458	78143	86923
ENSG00000084676.15	624	599	800	537	724	0	660	668	705	709	460	653	689	746	725	648	761	671	913	880	763	954	855	994
ENSG00000084693.16	249	230	345	215	301	0	279	270	302	270	170	305	255	306	317	244	315	229	330	330	273	321	255	287
ENSG00000084710.14	22	20	25	15	12	0	25	17	16	15	13	17	18	27	19	14	25	16	28	32	18	41	36	31
ENSG00000084731.15	234	189	323	164	222	0	190	171	216	244	131	229	207	235	259	187	230	188	283	266	213	513	523	554
ENSG00000084733.11	1468	1316	1922	1175	1744	0	1543	1502	1529	1567	1003	1690	1528	1594	1897	1501	1785	1703	2494	2306	2061	3003	3112	3281
ENSG00000084734.9	188	181	241	156	218	0	229	233	190	204	125	207	200	238	211	209	240	226	383	389	360	504	444	587
ENSG00000084754.12	2012	2092	2686	1759	2744	0	2547	2529	2419	2469	1723	2595	2383	2612	2667	2313	2682	2390	3491	3235	2653	3165	3163	3585
ENSG00000084764.12	172	141	186	111	175	0	152	168	143	177	111	191	163	188	163	183	213	206	275	250	190	250	286	333
ENSG00000084774.14	871	899	1201	669	1116	0	944	909	939	970	676	1060	891	976	966	927	1017	893	1510	1340	1150	1617	1345	1522
ENSG00000085063.16	3251	2864.47	4148.73	2127	3316.7	0	3021	2937	3337	3390.07	2094.06	3224	3218.61	3220.4	3731.18	2988.71	3294	3161	4333	3955	3437	4281	4329.67	4658.34
ENSG00000085117.12	111	168	145	123	188	0	153	156	156	151	97	180	142	179	184	147	150	137	214	180	144	239	260	261
ENSG00000085185.15	554	522	756	463	568	0	616	613	579	601	410	687	576	711	684	638	707	567	912	871	639	813	747	866
ENSG00000085224.22	1192	1063	1457	943	1302	0	1286	1142	1382	1357	808	1288	1239	1301	1411	1127	1341	1158	1579	1574	1367	1281	1336	1512
ENSG00000085231.14	222.75	203.18	283.34	156.14	206.68	0	220.52	212.46	228.41	227.62	173.49	220.16	229.8	232.07	262.29	211.8	258.98	229.03	355.76	316.22	276.33	321.28	292.64	360.27
ENSG00000085265.11	0	0	0	0	0	0	0	0	0	0	0	0	0	0	0	0	0	0	0	0	0	0	0	0
ENSG00000085274.15	248	207	281	227	291	0	265	271	293	298	157	231	292	269	325	255	256	278	380	370	347	374	397	436
ENSG00000085276.19	38	22	49	12	31	0	22	23	15	30	14	23	31	37	40	30	26	17	43	46	32	144	136	156
ENSG00000085365.18	480	386	524	323	449	0	460	450	478	421	302	454	461	447	558	433	536	469	707	606	541	665	711	773
ENSG00000085377.14	547	502	714	416	605	0	573	543	589	610	372	629	569	587	646	593	692	612	830	736	665	643	584	768
ENSG00000085382.12	88	93	171	95	131	0	122	126	100	117	84	109	118	114	133	119	136	104	156	161	146	179	176	209
ENSG00000085415.16	383	360	536	362	520	0	454	483	479	456	310	499	443	458	573	474	514	480	689	608	582	678	631	727
ENSG00000085433.15	105	94	157	68	136	0	111	90	132	123	86	124	116	149	132	116	115	118	133	177	123	140	147	149
ENSG00000085449.15	760.76	754.06	1025	629	949	0	1032	914.27	863	901.95	562.86	955	827.45	900.92	1010.19	873.79	966	891.63	1223	1208	1020.84	1324	1330.3	1514.37
ENSG00000085465.13	359	360	413	254	431	0	417	423	395	422	316	446	379	407	374	351	435	382	536	599	405	424	373	414
ENSG00000085491.17	506	442	650	369	472	0	475	440	509	476	291	496	479	537	628	452	545	516	744	755	537	1122	1130	1175
ENSG00000085511.20	584	658	868	554	820	0	754	749	721	747	515	838	726	792	777	700	768	754	935	949	805	772	798	860
ENSG00000085514.16	15.13	8.12	16	7.05	16.19	0	22.32	16.04	9.09	23.17	6	14.09	12.07	10.17	9	13.06	16.14	11.04	9.09	33.24	19.12	9.1	3	7.1
ENSG00000085552.17	8	7	6	10	7	0	11	5	9	8	3	13	11	14	5	6	6	6	12	6	6	2	4	5
ENSG00000085563.14	29	11	17.18	14	25	0	13	10	18	11.09	13	20	18	19.25	28.57	17.17	17.08	22	24	14	22	241	254	274
ENSG00000085644.14	133	121	170	93	124	0	95	105	137	130	92	142	115	126	139	110	140	103	192	167	124	187	203	239
ENSG00000085662.14	1173	769	1515	677	855	0	669	754	984	975	509	838	833	859	1212	690	892	847	1040	1017	849	1289	1347	1582
ENSG00000085719.13	1434	1391	1920	1179	1839	0	1746	1707	1735	1667	1077	1762	1715	1764	2008	1604	1706	1707	2384	2226	1900	2019	1867	2140
ENSG00000085721.12	710.25	630.84	923.78	553.47	765.61	0	740.67	678.85	706.87	804.43	459	745.37	727.68	808.38	808.58	768.49	874.05	749.39	1027.96	1143.74	897.57	1071.64	1049.16	1203.16
ENSG00000085733.16	3037	2758	3947	2295	3019	0	3000	3014	3086	3238	2011	3238	3182	3351	3446	3245	3708	3233	5542	5330	4327	7854	7184	8123
ENSG00000085741.13	0	1	2	0	1	0	2	3	3	2	2	3	0	1	0	0	0	1	0	1	0	6	2	6
ENSG00000085760.15	459	449	620	402.99	589.99	0	548	530	560	601	378	610	534	577	604	550	630	536	820	776	612	814	750	800.99
ENSG00000085788.14	509	474	631	385	651	0	578	546	551	530	318	603	550	559	547	532	594	552	792	778	651	761	735	860
ENSG00000085831.15	184	190	216	155	214	0	166	195	201	201	117	178	215	255	224	234	237	236	454	440	320	815	818	863
ENSG00000085832.17	695	675	963	594	878	0	848	890	805	846	519	881	812	876	992	792	978	814	1317	1299	1057	1149	1113	1265
ENSG00000085840.13	29	21	42	20	19	0	25	27	37	30	25	28	31	28	24	21	35	31	67	49	36	50	41	56
ENSG00000085871.9	618	599	810	535	833	0	767	754	797	761	482	804	689	784	793	792	795	714	983	988	737	581	481	611
ENSG00000085872.15	917.86	920	1309	802.98	1019	0	917.95	959	1014	1087	632	1115.97	1016	1153	1170.96	1010.92	1188	974	1578.63	1582.84	1252	1498.85	1496.85	1605
ENSG00000085978.22	545	516	749	470	716	0	652	574	561	696	398	670	620	666	704	617	689	664	934	915	829	921	877	964
ENSG00000085982.13	887	872	1198	735	1098	0	1055	1024	1034	1042	740	1121	1062	1126	1142	1000	1169	1044	1573	1587	1160	1561	1482	1500
ENSG00000085998.14	860	818	1055	684	896	0	806	784	935	869	618	964	846	1005	960	842	945	915	1394	1220	1028	1355	1260	1381
ENSG00000085999.13	19	10	22	9	7	0	7	7	13	14	16	10	9	14	19	24	13	15	19	27	13	23	14	2
ENSG00000086015.21	1056	995	1300	877	1107	0	1089	1044	1145	1177	719	1259	1076	1247	1269	1162	1300	1153	2073	2094	1636	2519.92	2180	2395.92
ENSG00000086061.16	2565	2252	3248	1902	2849	0	2560	2510	2756	2881	1728	2779	2742	2797	3181	2863	2937	2897	4109	4129	3407	4672	4428	5291
ENSG00000086062.12	3741	3682	4989	3079	4731	0	4422	4279	4476	4305	2907	4727	4117	4440	4510	3889	4449	4018	5940	5444	4331	5391	5212	5666
ENSG00000086065.14	410	366	550.99	306	450	0	438	468	493	513	306	496	458	474	597	452	617	492	684	674	555	838	923	1001
ENSG00000086102.19	589	601	866	510	730	0	767	704	691	756	489	797	768	791	773	683	818	751	1168	1138	906	1001	1049	1210
ENSG00000086159.13	2	0	0	0	0	0	1	2	1	0	0	0	0	0	0	0	0	0	0	0	0	1	0	0
ENSG00000086189.10	213	173	261	169	223	0	209	216	226	190	151	257	214	210	275	189	221	228	297	331	266	355	384	417
ENSG00000086200.16	294	242	397	238	369	0	330	288	294	359	209	345.25	333	318	403	376.38	390	349	510.39	396	401	532	542	581.32
ENSG00000086205.18	2.06	3	1.19	1	1.13	0	2.21	4	3.12	0	3.47	2.29	0	1.09	1.14	5.8	2.11	0	3.45	1.12	0	0	0	0
ENSG00000086232.13	1951	1911	2589	1759	2452	0	2342	2268	2263	2247	1487	2525	2234	2433	2466	2196	2489	2222	3129	3070	2555	3386	3296	3861
ENSG00000086288.12	0	1	1	1	1	0	3	0	0	0	2	1	2	1	2	2	5	0	0	2	4	0	0	2
ENSG00000086289.12	370	313	453	233	364	0	344	341	374	352	242	338	333	421	426	390	472	375	637	548	481	333	333	340
ENSG00000086300.15	122	140	149	101	141	0	140	132	150	153	73	135	119	176	180	153	148	163	204	217	179	297	305	319
ENSG00000086475.15	673	682	1001	556	872	0	748	757	761	813	535	825	782	797.99	913	776	864	744	1178	1079	894	886	873	955
ENSG00000086504.17	742	825	976	635.24	856	0	826	868	818.87	927	493	953.44	777	901	921	769	922	737	1184.16	1110.14	870	1131.14	964	1107.09
ENSG00000086506.3	0	1	0	1	0	0	0	0	0	0	0	0	0	0	0	0	0	0	0	0	0	1	0	1
ENSG00000086544.3	590	517	797	463	650	0	588	589	611	679	392	653	602	700	716	655	758	609	1000	1016	784	1176	1283	1348
ENSG00000086548.9	5	7	10	2	10	0	5	5	7	6	1	6	4	4	3	0	2	5	12	9	10	17	20	20
ENSG00000086570.12	2	2	1	3	1	0	3	2	0	1	2	1	1	2	2	2	1	1	0	1	5	1	0	1
ENSG00000086589.12	476	465	671	413	582	0	535	523	510	586	405	550	553	571	613	553	570	568	857	813	641	784	703	844
ENSG00000086598.11	3967	3802	5424	3370	5291	1	4713	4845	4682	4935	3157	5195	4458	4846	5352	4494	5083	4658	6388	6130	5046	8056	7825	9029
ENSG00000086619.14	229	190	245	167	231	0	196	216	210	205	129	245	183	214	258	206	201	209	276	224	227	254	265	296
ENSG00000086666.19	668	599	835	547	795	0	788.99	801	719.99	728	471	810	713.99	740	863	687	831.99	738.99	1015	1062.99	785.98	1036	1022.99	1042
ENSG00000086696.11	407	372	538	346	534	0	444	470	492	523	369	483	467	489	558	429	552	449	645	646	494	355	267	328
ENSG00000086712.13	543	593	744	437	785	0	615	648	684	691	434	676	643	678	756	693	803	707	1020	970	796	1016	989	1206
ENSG00000086717.18	2	3	3	1	6	0	4	3	1	3	3	10	4	1	3	2	5	1	6	5	6	1	0	0
ENSG00000086730.17	17	23	25	23	16	0	17	31	14	14	14	37	22	18	33	16	30	26	16	41	21	13	18	6
ENSG00000086758.16	4306	4139	5586	3476	5015	0	4762	4579	5096	4681	3044	4989	4758	4950	5390	4324	4778	4255	6615	6237	5184	6397	6823	7090
ENSG00000086827.9	207	225	301	171	289	0	225	261	247	249	170	233	233	257	291	238	251	254	354	332	283	395	407	516
ENSG00000086848.15	435	405	540.78	362	453	0	458	433	452	491.26	303.46	484	436	460	494	493	498	505	670	676.78	560	693.26	657	728
ENSG00000086967.10	0	1	0	0	0	0	1	0	0	0	0	0	0	0	1	0	0	0	0	0	0	0	0	2
ENSG00000086991.13	6	9	27	16	22	0	18	10	18	8	11	11	19	11	22	21	18	15	18	25	19	20	16	14
ENSG00000087008.16	361	347	417	319	375	0	373	408	373	382	280	408	370	421	402	369	420	377	606	498	430	521	456	468
ENSG00000087053.18	351	313	453	281	380	0	351	340	362	369	207	362	354	389	422	376	427	363	591	565	445	899	857	911
ENSG00000087074.8	912	791	1235	588	732	0	610	639	779	752	459	811	788	838	996	704	869	858	1267	1192	997	2161	2292	2685
ENSG00000087076.9	128	138	175	104	170	0	170	193	165	160	107	180	152	163	188	128	155	134	184	206	152	184	142	209
ENSG00000087077.14	660	605	887	506	661	0	586	623	681	660	491	789	545	706	728	600	733	637	960	868	716	686	624	645
ENSG00000087085.15	181	200	225	138	177	0	181	151	177	191	103	209	158	181	195	188	246	188	288	306	235	463	450	493
ENSG00000087086.15	91236	89320	119532	78788.1	115878	3	101906	108884	110970	112600	72437.3	117089	111557	116083	126644	121081	129746	113920	194039	182419	145148	193579	170180	198490
ENSG00000087087.20	1252	1151	1632	920	1394	0	1234	1273	1335	1402	900	1481	1225	1303	1311	1163	1330	1170	1791	1852	1430	1591	1383	1748
ENSG00000087088.20	1701	1528	2267	1148	1639	0	1601	1534	1669	1806	1129	1903	1682	1792	1888	1521	1842	1592	2567	2562	1968	2648	2299	2607
ENSG00000087095.13	305	323	380	260	327	0	266	292	379	322	238	329	320	308	354	318	355	315	453	455	377	507	464	489
ENSG00000087111.21	493	412	639	402	502	0	492	513	499	484	323	549	484	494	531	476	552	469	750	679	497	694	708	710
ENSG00000087116.16	0	0	0	2	0	0	0	1	0	0	0	0	1	1	0	0	2	0	2	0	0	2	0	0
ENSG00000087128.10	0	0	0	0	0	0	0	0	0	1	0	0	0	0	0	0	0	0	0	0	0	0	0	1
ENSG00000087152.15	1138	1120	1582	901	1275	0	1228	1124	1353	1236	786	1378	1251	1261	1428	1169	1315	1206	1818	1692	1414	1892	1706	1949
ENSG00000087157.19	343	338	462	269	359	0	342	323	359	367	246	406	339	357	427	348	416	329	495	538	425	570	510	610
ENSG00000087191.13	949	824	1152	711	996	0	1004	944	1028	1018	662	1129	959	1055	1089	1059	1179	1024	1573	1448	1240	1711	1607	1813
ENSG00000087206.17	236	197	302	202	243	0	298	232	254	261	159	280	239	228	280	265	266	238	392	427	317	450	405	508
ENSG00000087237.12	1	0	0	0	2	0	2	0	1	0	1	1	0	0	0	0	0	0	1	0	0	0	0	0
ENSG00000087245.13	0	5	6	2	2	0	0	1	1	1	0	2	0	10	4	6	1	2	3	1	6	3	10	12
ENSG00000087250.8	0	0	0	0	0	0	0	0	0	0	0	0	0	0	0	0	4	0	0	0	0	0	0	0
ENSG00000087253.13	17	8	25	18	14	0	14	22	16	7	11	6	12	17	11	15	17	13	16	18	8	20	38	35
ENSG00000087258.15	3	11	4	0	5	0	3	2	7	7	1	3	2	1	3	6	6	4	4	8	3	4	7	8
ENSG00000087263.17	699	608	887	521	796	0	748	699	683	738	543	801	723	786	874	814	862	858	1209	1224	866	1038	1008	1227
ENSG00000087266.17	1553	1701	2290	1514	2180	0	2252	2172	2118	1855	1413	2292	2056	2260	1908	2095	2434	1979	3066	3294	2642	1767	1810	2030
ENSG00000087269.16	591	518	720	396	602	0	543	560	624	602	415	624	618	642	681	611	676	560	1034	928	756	1096	1006	1175
ENSG00000087274.17	3369	3300	4383	2733	3812	0	3832	3869	3837	3793	2434	4155.98	3668	3924	4102	3522	4028	3515	5236	5179	4390	3842	3772	4083
ENSG00000087299.12	196	181	250	167	228	0	232	226	191	209	122	243	228	241	214	210	221	176	298	288	232	200	165	199
ENSG00000087301.9	206	268	305	199	324	0	335	328	312	322	222	357	241	274	296	221	262	215	286	222	208	127	103	115
ENSG00000087302.9	973	900	1285	706	1087	0	1039	996	975	1076	683	1091	964	1083	1141	1102	1146	1018	1536	1539	1199	2058	1896	2323
ENSG00000087303.18	12	4	14	8	11	0	4	14	11	11	5	13	9	10	21	6	11	2	15	8	4	18	17	14
ENSG00000087338.5	279	255	394	196	285	0	263	344	297	328	193	327	343	327	381	308	374	310	422	391	337	363	370	472
ENSG00000087365.16	2402	2327	3168	1880	2704	0	2659	2581	2602	2671	1784	2964	2564	2820	2701	2453	3036	2552	3881	3847	3021	4042	3771	4165
ENSG00000087448.11	424	385	564	322	445	0	395	423	396	500	287	429	411	539	495	456	470	459	701	794	604	922	805	949
ENSG00000087460.25	11096	10804	14942	9132	12883	0	12691	12329	12380	12639	8062	13773	11998	12695	13536	11185	13075	11667	17673	16366	13274	19539	17678	19647
ENSG00000087470.18	1054	929	1351	813	1168	0	1039	1050	1116	1151	706	1138	1075	1220	1285	1177	1135	1148	1606	1544	1438	1599	1564	1774
ENSG00000087494.16	12	7	7	4	7	0	0	4	7	2	2	9	9	5	9	13	2	7	5	4	7	53	68	89
ENSG00000087495.17	0	0	0	0	0	0	0	0	0	0	0	0	0	0	0	0	0	0	0	0	0	0	0	0
ENSG00000087502.18	456	447	632	384	618	0	511	521	536	550	347	532	465	523	619	545	549	522	766	718	577	897	905	1026
ENSG00000087510.7	0	0	0	0	0	0	0	0	1	0	0	0	0	0	0	0	0	0	1	0	0	0	0	0
ENSG00000087586.17	109.95	101	151.95	85	106	0	97	80	86	127	55	109.9	92.94	108	137	88.97	124	85	165	133	131	119.91	123	128.94
ENSG00000087589.16	4	10	20	12	11	0	15	21	6	11	11	14	6	15	18	12	7	10	9	16	24	6	5	9
ENSG00000087842.11	364	347	501	296	486	0	457	484	473	482	338	518	494	537	565	579	636	572	944	921	753	637	596	692
ENSG00000087884.14	106	93	142	67	119	0	78	111	102	108	72	106	81	93	103	92	122	101	134	111	96	106	83	125
ENSG00000087903.13	10	11	9	13	24	0	9	15	17	7	6	10	18	14	15	9	12	15	12	22.14	18	50	33	38
ENSG00000087995.15	245.08	208.03	295.05	149.11	259.65	0	282.67	268.46	278.15	295.33	178.01	267.88	261.07	273.66	290.16	265.48	330.03	252.93	397.75	402.89	277.19	419.56	437.76	455.78
ENSG00000088002.11	4	2	0	0	1	0	0	0	0	0	0	2	1	0	1	0	2	0	0	2	0	6	0	1
ENSG00000088035.18	173	195	291	173	250	0	232	265	223	235	140	270	203	258	263	230	240	248	337	346	249	318	271	327
ENSG00000088038.19	705	692	994	583	769	0	758	687	777	859	477	845	781	760	823	625	837	713	1033	1082	915	848	763	922
ENSG00000088053.11	14	14	29	15.43	16	0	17	17	25	19	13	12	13	25	16	22	20	17	34	50	30	8	21	16.78
ENSG00000088179.9	281	221	370	205	296	0	313	287	323	315	204	275	313	311	306	256	362	314	474	414	381	345	386	435
ENSG00000088205.13	681	628	870	580	826	0	696	786	800	805	524	820	724	807	858	764	894	762	1200	1087	1018	1604	1626	1804
ENSG00000088247.17	2102	2068	2747	1591	2262	0	2073	2129	2131	2363	1538	2494	2273	2395	2544	2186	2576	2067	3537	3379	2662	3585	3257	3568
ENSG00000088256.9	1249	1244	1815	1001	1433	0	1252	1323	1396	1465	895	1390	1267	1532	1523	1192	1504	1248	2045	1915	1513	2288	2224	2480
ENSG00000088280.19	594	648	770	495	728	0	743	703	681	679	488	797	723	832	731	778	775	702	1196	1205	902	1082	958	999
ENSG00000088298.13	440	426	618	325	499	0	508	484	551	472	326	495	420	527	545	438	461	419	614	609	469	605	521	562
ENSG00000088305.18	48	59	97	56	76	0	70	65	73	60	33	52	63	72	69	76	89	60	97	89	84	101	84	100
ENSG00000088320.4	0	0	0	0	0	0	0	0	0	0	0	0	0	0	0	0	0	0	0	0	0	0	0	0
ENSG00000088325.16	201	133	257	115	151	0	96	102	174	202	92	100	133	150	184	141	178	145	208	189	134	183	190	244
ENSG00000088340.16	120	119	128	82	165	0	173	152	126	150	100	144	108	138	101	88	145	73	152	183	116	72	53	66
ENSG00000088356.6	451	434	642	338	510	0	486	481	550	506	304	471	511	520	564	463	600	550	780	752	597	725	712	855
ENSG00000088367.23	212	197	249	177	231	0	220	209	207	193	117	239	258	233	254	196	292	259	376	283	228	487	466	505
ENSG00000088386.17	366	434	535	347	528	0	553	527	491	527	349	556	459	507	514	443	482	495	620	632	516	284	311	270
ENSG00000088387.19	169	199	237	134.71	222	0	180	159	202	204	131	180	161	208	192	141	185	169	257	253	205	403	403	379
ENSG00000088448.14	984	880	1264	693	1045	0	928	913	1028	1088	671	1080	904	1033	1073	888	1062	963	1469	1512	1246	1617	1656	1883
ENSG00000088451.11	128	147	159	101	162	0	142	162	129	150	97	164	133	145	164	143	150	162	224	231	175	208	223	283
ENSG00000088538.13	8	11	21	10	11	0	15	6	12	9	8	15	13	16	12	9	16	10	17	25	18	38	34	47
ENSG00000088543.15	83	57	102	66	122	0	81	73	104	91	73	93	78	93	77	69	82	59	100	92	85	101	69	65
ENSG00000088682.14	608.99	685	868	519	809	0	746	751	731	816.99	464	841	701	771	805	733	884	701	1082	986	798	863	830.99	1012
ENSG00000088726.16	8	1	15	4	0	0	3	4	4	2	1	4	4	3	8	5	0	3	4	0	4	60	105	87
ENSG00000088727.12	22	38	45	29	26	0	23	24	25	34	10	32	31	34	31	33	38	28	42	43	32	63	62	54
ENSG00000088756.12	10	11	10	9	12	0	14	9	6	8	7	13	7	10	11	11	15	6	17	18	16	38	27	49
ENSG00000088766.12	736	724	942	625	981	0	1039	952	935	1020	623	1019	849	998	984	901	1052	901	1345	1330	1057	1000	879	1002
ENSG00000088782.5	0	0	0	0	0	0	0	0	0	0	0	0	0	0	0	0	0	0	0	0	0	0	0	0
ENSG00000088808.18	639	571	842	495	734	0	666	684	656	656	448	741	689	739	755	647	720	633	984	1095	789	884	802	916
ENSG00000088812.18	2804	2754	3664	2376	3421	0	3199	3112	3140	3243	2227	3402	3163	3259	3521	2901	3241	2962	3944	3694	3152	2750	2875	3151
ENSG00000088826.18	527	395	666	354	464	0	366	398	439	436	290	488	435	528	614	489	562	483	844	773	598	1539	1440	1535
ENSG00000088827.12	0	0	1	0	1	0	2	0	0	0	0	0	0	0	0	1	0	0	0	0	1	0	0	0
ENSG00000088832.17	1662.79	1608.52	2303.78	1166.15	1773.67	0	1706.07	1658.34	1753.69	1793.22	1134.57	1821.83	1747	1890.87	2090.13	1702.97	1902.69	1724.08	2725.19	2493.34	2012.68	3528.74	3216.55	3643.71
ENSG00000088833.17	1099	1009	1333	814	1082	0	1085	1129	1155	1168	779	1249	1106	1146	1328	1163	1306	1150	1811	1725	1378	1869	1646	1845
ENSG00000088836.14	61	35	64	31	29	0	22	18	47	50	26	53	47	48	42	18	42	44	48	55	41	152	145	158
ENSG00000088854.12	373	313	486.08	321	367	0	387	356	371	411	249	400	373	442.03	430	409	413	393	608	585	485	544	559	565
ENSG00000088876.12	99	111	153	81	129	0	140	133	168.35	112	98	148.5	128	118	143	142	135	132	171	175.65	165.72	197	170	205.34
ENSG00000088881.20	329	307	437	263	360	0	350	354	342	376	269	396	327	358	330	363	416	320	525	591	437	605	525	563
ENSG00000088882.8	39	43	76	56	67	0	29	42	46	55	27	58	44	67	60	52	63	45	90	55	62	49	28	48
ENSG00000088888.18	2138	2011	2662	1724	2397	0	2309	2309	2256	2369	1585	2390	2322	2511	2542	2350	2540	2164	3422	3398	2862	3734	3726	3906
ENSG00000088899.15	1175	1058	1519	893	1146	0	1009	1131	1128	1210	745	1348	1114	1336	1242	1039	1354	1141	2077	2124	1598	1935	1809	1952
ENSG00000088926.13	432	436	523	393	595	0	633	605	545	536	359	660	528	506	493	465	525	471	558	572	480	288	264	315
ENSG00000088930.8	875	833	1156	712	993	0	852	943	1001	985	638	1002	894	1038	1114	1022	1032	899	1392	1422	1107	1445	1530	1644
ENSG00000088970.16	109	97	141	95	153	0	125	150	120	153	87	155	138	146	141	123	171	153	168	194	155	178	214	213
ENSG00000088986.11	1780	1652	2223	1373	2089	0	1947	1969	1961	1883	1187	2012	1898	1963	2146	1904	2201	1887	2891	2803	2235	2854	2536	2884
ENSG00000088992.18	49	33	53	18	30	0	26	23	41	31	10	32	30	33	39	27	40	25	33	34	31	63	71	67
ENSG00000089006.16	1058	1122.97	1473.6	939	1439.99	0	1311	1259	1292.99	1362.88	877.99	1414.97	1252.76	1334.56	1323.94	1214.98	1499.99	1345.98	1833.95	1851.95	1483.96	1429	1304.96	1744.98
ENSG00000089009.15	4950.13	4874.81	6839.5	4181.45	6298.12	0	5475.45	5374.25	5780.06	5791.82	3787.81	5978.32	5428.31	5763.67	6314.56	5615.76	6285.86	5526.07	8462.8	7897.64	6312.34	9079.27	8040.21	9240.06
ENSG00000089012.14	0	0	0	1	0	0	0	0	0	0	0	1	0	0	0	0	0	0	0	0	0	0	0	0
ENSG00000089022.14	437	445	591	371	482	0	432.08	483	451.63	494	293	485	477	582	484.54	491	545	525	742	838	665	798	782	911
ENSG00000089041.17	64	66	81	59	70	0	112	79	93	94	54	86	57	83	62	40	49	50	48	62	38	18	20	17
ENSG00000089048.14	270	251	298	177	320	0	251	252	282	295	166	283	269	269	318	279	346	293	412	413	376	421	456	517
ENSG00000089050.16	363	440	551	340	498	0	493	474	420	542	322	479	446	459	520	449	507	518	715	606	490	527	443	592
ENSG00000089053.13	1321	1227	1672	1065	1606	0	1477	1496	1404	1514	989	1660	1540	1534	1675	1441	1568	1482	2148	2140	1677	2239	2204	2441
ENSG00000089057.15	290	310	423	239	419	0	349	361	384	391	221	366	372	368	390	269	385	348	471	448	365	393	358	392
ENSG00000089060.11	388	429	521	309	463	0	450	492	485	412	304	498	375	466	445	447	518	439	685	755	513	938	825	882
ENSG00000089063.15	1052	1088.98	1402.97	910	1354	0	1252	1284	1205	1203.98	851	1304.93	1206	1261	1409	1112	1290	1125	1613	1684	1380.99	1922.94	1828	2137
ENSG00000089091.16	20	15	23	15	16	0	16	14	20	19	8	22	15	23	17	18	16	18	27	34	18	25	33	27
ENSG00000089094.19	274	213	359	191	242	0	239	221	247	281	145	273	223	253	275	255	333	257	434	386	305	496	429	443
ENSG00000089101.18	0	1	0	0	0	0	1	1	5	0	0	1	0	0	1	2	0	0	2	1	0	0	3	4
ENSG00000089116.4	0	0	0	0	0	0	0	0	0	2	0	0	0	0	0	0	0	0	0	0	0	1	3	1
ENSG00000089123.16	86	71	119	73	108	0	102	109	93	79	49	84	85	122	89	85	88	90	163	115	119	158	126	182
ENSG00000089127.13	39	45	60	37	73	0	66	66	53	67	49	49	63	55	63	72	58	65	83	83	58	75	58	82
ENSG00000089154.11	2255	2354	3016	1928	2752	0	2502	2644	2621	2711	1778	2796	2613	2828	2862	2492	2774	2461	4044	3781	3159	5710	5893	6174
ENSG00000089157.16	9312.08	9478.06	13398.1	7718.99	11750.2	2	11226.9	11132.4	11340.8	11041.5	7204.81	11997.6	10423.9	10854.5	12337.4	10446.2	12086.2	10295.3	16183.3	15406.3	11924.5	17458.3	16094.2	18122.7
ENSG00000089159.16	1265	1196	1671	1009	1433	0	1272	1189	1310	1240	786	1435	1262	1420	1445	1270	1393	1264	1915	1874	1459	2424	2362	2505
ENSG00000089163.4	57	79	125	75	94	0	111	106	94	119	70	120	67	89	95	65	78	79	99	104	68	50	50	49
ENSG00000089169.15	0	0	0	0	1	0	0	0	0	0	2	0	0	0	0	0	0	1	4	0	0	0	0	0
ENSG00000089177.18	345	298	421	237	375	3	327	349	329	354	241	339	312	393	399	354	369	361	499	458	350	706	652	808
ENSG00000089195.15	204	148	277	139	196	0	180	183	203	188	133	221	217	219	225	216	217	208	332	339	280	412	320	453
ENSG00000089199.10	1	0	0	1	1	0	3	1	1	0	0	2	2	0	4	1	2	1	2	0	0	1	3	0
ENSG00000089220.5	8419	9023.99	11500	7482.99	11867	0	11426	11475	10670	11025	7279	12587	10076	10867	11223	9586	11033	9391	12936	12795	9833.99	6814	5916	6809.99
ENSG00000089225.19	0	0	0	0	0	0	0	0	0	0	0	0	0	0	0	0	0	0	0	0	0	0	0	0
ENSG00000089234.16	301	289	378	235	323	0	335	343	315	385	219	346	303	355	347	366	367	308	542	445	376	541	549	606
ENSG00000089248.7	1842	1751	2203	1466	2163	0	2008	2084	2050	2198	1289	2183	1929	2053	2320	2125	2171	1847	2872	2804	2096	2746	2426	2921
ENSG00000089250.19	0	0	1	0	0	0	0	0	0	0	0	0	0	0	0	0	0	0	0	0	0	0	0	0
ENSG00000089280.18	2324	2208	3060	1776	2485	0	2163	2323	2337	2630	1658	2544	2244	2489	2640	2378	2814	2242	3568	3682	2999	4801	4418	5125
ENSG00000089289.16	322	288	428	231	345	0	297	351	337	342	219	392	312	343	396	321	387	337	564	429	395	499	522	575
ENSG00000089327.15	13	6	39	10	15	0	8	7	15	16	7	15	13	13	32	6	20	16	15	26	16	165	193	244
ENSG00000089335.21	228.54	230.58	311.58	258.34	316	0	295.88	291.58	315.9	302.78	201	308	307.18	366.3	314.61	260.59	351.54	312.56	394.1	432.58	362	362.58	340.71	414.85
ENSG00000089351.14	554	539	714	428	512	0	497	531	519	508	373	562	543	584	597	510	596	523	916	888	677	1748	1561	1657
ENSG00000089356.18	18	17	29	20	27	0	35	33	28	34	27	38	40	23	24	18	19	19	38	23.75	24.16	6	16	13
ENSG00000089472.16	310	302	455	308	450	0	368	384	318	404	250	368	334	363	404	336	421	297	497	479	370	439	404	466
ENSG00000089486.17	691	736	988	562	888	0	809	773	797	786	553	920	778	900	923	807	938	794	1251	1274	1008	755	746	802
ENSG00000089505.17	12	10	7	3	6	0	8	13	6	13	5	9	8	11	9	4	19	4	20	16	23	23	19	11
ENSG00000089558.9	0	0	0	0	0	0	0	0	0	0	0	0	0	0	0	0	0	1	0	2	1	1	3	0
ENSG00000089597.18	5724	5692	7628	4646	7095	0	6881	6550	6514	6513	4430	7190	6239	6715	6967	5957	6852	6143	9287	8676	6728	9137	8848	9516
ENSG00000089639.11	205	203	283	153	211	0	143	179	158	193	110	204	178	213	229	202	205	229	383	326	289	619	555	626
ENSG00000089682.16	313	286	435	263	382	0	361	361	349	350	227	394	365	389	391	355	335	350	479	542	442	561	567	593
ENSG00000089685.15	59	21	65	28	21	0	21	22	28	38	11	24	39	33	39	28	32	31	42	34	26	16	12	12
ENSG00000089692.9	8	11	9	1	16	0	3	6	5	9	4	5	6	6	2	4	1	8	1	6	4	7	7	6
ENSG00000089693.10	2115	2098	2999	1719	2521	0	2156	2354	2375	2425	1564	2771	2164	2456	2480	1969	2496	2048	3269	2962	2259	3758	3521	3977
ENSG00000089723.10	58	59	100	43	59	0	76	69	69	57	36	71	72	86	65	67	60	56	75	71	62	76	92	79
ENSG00000089737.17	1132	1087	1559	880	1348	0	1255	1268	1331	1305	834	1357	1254	1279	1407	1293	1387	1291	1974	1890	1620	2004	1980	2337
ENSG00000089775.11	157	189	216	141	229	0	192	180	186	237	142	205	178	201	219	197	221	170	267	326	279	245	239	279
ENSG00000089818.18	318	351.66	444.9	259.62	387	0	373	357	385	380.89	254	398	363	390	421	381	386	346.67	527.85	503.99	425.62	672	693	824.82
ENSG00000089820.15	93.38	113.94	151	86	113	0	124	139.74	134.95	108.8	73.54	132	125	126	133	118	132	113	186.42	168	136	124.74	91	103
ENSG00000089847.12	55	51	74	45	62	0	58	66	60	79	33	68	39	58	56	53	78	71	102	129	77	78	51	69
ENSG00000089876.12	728	654	917	551	770	0	729	674	778	829	517	786	712	731	894	704	805	805	1184	1096	1023	1827	1778	2010
ENSG00000089902.10	629	586	779	533	725	0	705	693	738	731	468	807	674	755	762	592	735	679	952	868	734	844	920	980
ENSG00000089916.18	780	689	1050	632	920	0	850	777	795	905	556	783	829	919	983	779	880	798	1136	1231	1116	1243	1420	1441
ENSG00000090006.17	26	29	34	20	33	0	24	21	23	29	15	21	23	22	24	26	33	24	43	40	25	67	81	81
ENSG00000090013.11	438	465	572	343	590	0	496	540	520	546	301	590	516	572	528	573	623	522	912	876	612	930	873	972
ENSG00000090020.11	200	167	236	130	165	0	141	149	144	171	97	187	188	190	222	159	183	147	252	304	203	293	330	316
ENSG00000090054.15	538.16	438.58	672.28	382	550.83	0	522	507	557.79	532.38	367.96	546.67	530.43	525.95	642.94	519.27	576.58	540.41	736.46	743.81	647.38	820.16	850.75	986.39
ENSG00000090060.18	2356	2385	3146	1953	3031	0	2864	2655	2794	2780	1781	2927	2636	2932	3027	2549	2951	2730	3789	3824	3183	4336	4403	5115
ENSG00000090061.17	1065	1015	1426	818	1183	0	1136	1094	1174	1069	712	1231	1086	1196	1194	1073	1217	1104	1609	1629	1237	1937	1790	2005
ENSG00000090097.21	932	876	1180	740	877	0	842	863	1009	968	614	1029	951	1051	1109	932	1074	907	1650	1525	1295	1379	1191	1301
ENSG00000090104.12	0	0	0	0	0	0	0	0	0	0	0	0	0	0	0	0	0	0	0	1	0	0	0	0
ENSG00000090238.12	320	309	403	272	333	0	324	359	366	345	244	378	300	332	350	275	329	289	416	449	372	400	374	413
ENSG00000090263.16	280	300	399	265	356	0	364	361	345	399	241	376	361	335	418	348	374	348	489	423	336	403	359	421
ENSG00000090266.13	629	633	802	513	699	0	719	676	624	736	455	722	697	701	731	637	737	672	972	979	692	815	757	882
ENSG00000090273.14	1395	1216	1751	1029	1396	0	1212	1274	1340	1541	895	1412	1375	1425	1569	1514	1586	1512	2364	2160	1735	2716	2586	2974
ENSG00000090316.16	947	901	1209	785	1022	0	902	1039	1146	1118	701	1120	1009	1034	1187	1039	1091	973	1631	1494	1313	1639	1472	1697
ENSG00000090339.9	1462	1307	1969	845	1245	0	1236	1105	1260	1287	870	1237	1095	1312	1364	951	1118	903	1283	1087	881	1950	1963	2220
ENSG00000090372.15	1063	993	1386	819	1060	0	1053	951	1062	1095	722	1197	1044	1080	1200	1004	1138	1010	1641	1624	1274	1785	1630	1863
ENSG00000090376.11	68	71	135	80	83	0	105	148	107	75	72	116	118	101	101	110	120	108	127	121	110	185	290	274
ENSG00000090382.6	781	733	1010	602	856	0	758	845	883	854	606	880	747	823	979	640	749	700	988	959	803	1770	1586	1875
ENSG00000090402.8	5	5	13	6	14	0	15	18	6	9	12	15	8	5	12	12	9	15	9	9	14	3	3	4
ENSG00000090432.7	565	541	777	453	623	0	585	640	630	657	420	656	663	727	747	646	736	621	1004	885	751	1123	1017	1163
ENSG00000090447.12	68	70	99	82	89	0	97	100	87	87	61	102	102	91	85	107	119	76	159	151	104	160	124	144
ENSG00000090470.15	192	182	279	137	205	0	193	222	252	207	123	205	214	196	209	168	202	212	313	300	266	315	304	292
ENSG00000090487.11	680	729	1009	623	933	0	911	868	853	894	521	895	855	915	907	821	927	823	1225	1197	1018	1386	1195	1448
ENSG00000090512.12	38	44	61	46	61	0	78	70	64	80	31	77	48	65	59	29	51	29	43	39	23	7	12	15
ENSG00000090520.11	1106	941	1275	813	1100	0	966	974	1078	1040.37	701	1153	999	1098	1225	957	1153	1070	1310	1282.87	1069.63	1730	1742	2110
ENSG00000090530.10	151	108	151	79	103	0	48	68	89	79	60	82	70	69	114	81	71	76	85	95	60	109	94	118
ENSG00000090534.20	148	133	178	125	186	0	166	171	192	160	96	165	142	143	148	136	201	159	221	213	196	235	202	246
ENSG00000090539.15	479	630	716	447	600	0	684	634	639	633	432	656	595	625	557	512	654	491	782	802	681	575	456	582
ENSG00000090554.13	11.63	4.18	9	15	10.87	0	9.96	11.92	9.38	11.23	8	20	9	11.71	17.82	3.36	12	8	20	17.65	6.78	6.28	13	9.78
ENSG00000090565.16	776	817	1086	646	909	0	932	899	924	921	576	998	869	982	938	838	920	800	1265	1276	1039	1032	924	1005
ENSG00000090581.10	610	646	806	548	791	0	706	730	752	714	450	790	683	714	741	673	775	654	1072	1060	869	1121	922	1080
ENSG00000090612.21	429	452	606	354.05	569	0	442	534	451	494	294	559	524	630	561	518	545	502	782	693	582	607	549	655
ENSG00000090615.15	1818	1757	2287	1440.94	1972	0	1891	1914	1988	1968	1344	2113	2012	2148	2125	2097	2229	1975	3147	3413	2719.97	4817	5068	5920.96
ENSG00000090621.14	2640.92	2629	3741	2309	3266	0	3097	3049	2948	3168	2011	3231	2830.99	3192	3258	2939	3447	2991	4678	4395	3496	4612	4366	4860
ENSG00000090659.18	0	0	0	0	0	0	0	0	0	1	0	0	0	0	0	0	0	0	0	0	0	0	0	0
ENSG00000090661.12	803	892	1091	729	1052	0	936	970	989	991	609	1032	922	1068	1044	869	1029	882	1238	1231	963	796	719	899
ENSG00000090674.16	227.82	203	305	129	223	0	186	171.46	260	203	142	221.88	212.96	200.95	233.63	198	234	244	346.81	361.69	281	648.38	658.94	711.81
ENSG00000090686.16	721	647	923	642	841	0	910	829	796	826	509	822	865	834	864	874	897	820	1161	1230	1007	1401	1355	1502
ENSG00000090776.6	519	524	613	416	531	0	513	506	533	498	357	563	486	619	580	478	582	438	699	737	515	762	775	893
ENSG00000090857.13	804.76	833.08	1023.13	647.53	962.55	0	942.37	892.65	940.86	870.88	595.8	959.21	872.13	917.16	974.71	808.35	946.19	898.42	1220.59	1300.4	1076.03	1107.12	1091.87	1269.47
ENSG00000090861.15	2172	2232	3101	1896	2901	0	2757	2911	2615	2619	1858	3064	2878	3026	3000	2797	3088	2907	4264	3995	3266	3093	2802	3264
ENSG00000090863.11	2582	2491	3507	2218	3166	0	2991	2909	2998	2907	1925	3011	2873	3104	3275	2876	3129	2835	4110	3895	3074	3734	3797	4131
ENSG00000090889.12	16	16	29	14	15	0	13	13	17	16	13	11	13	24	25	16	12	18	14	19	15	3	7	1
ENSG00000090905.19	1080	1023	1492	957	1395	0	1384	1318	1373	1331	900	1468	1257	1283	1300	1269	1474	1303	1735	1803	1531	1503	1457	1637
ENSG00000090924.15	884	673	936	560	718	0	624	612	735	718	462	776	654	750	710	608	802	669	1087	1048	839	1488	1369	1412
ENSG00000090932.10	0	0	4	1	0	0	0	0	0	0	0	1	1	3	0	2	0	3	2	1	1	6	4	1
ENSG00000090971.5	178	189	265	168	213	0	176	206	222	190	136	238	196	200	198	179	254	178	355	301	236	263	205	282
ENSG00000090975.12	468	467	544	358	546	0	454	540	514	509	310	594	427	568	534	397	530	512	692	758	513	724	700	711
ENSG00000090989.18	475	430	554	333	541	0	486	482	515	493	340	521	505	571	546	559	558	525	755	779	670	774	753	901
ENSG00000091009.8	461.02	350.02	548.82	335	465.16	0	408	426.41	445.17	388.9	305.55	456.82	447.61	480.24	550.18	417.35	413.36	446.58	600.15	590.48	472.9	646.75	633.1	636.6
ENSG00000091010.6	1	0	1	4	0	0	0	1	0	0	1	0	1	0	1	0	0	0	3	4	0	0	0	1
ENSG00000091039.17	784	709	1075	604	870	0	808	792	771	920	504	836	809	906	983	754	923	838	1179	1122	987	1504	1481	1513
ENSG00000091073.19	227.01	227.7	272.05	172.07	206.7	0	243.65	266.8	263.73	249.46	148.25	283.66	245.39	247.2	232.2	215.11	247.46	214.82	344.88	372.65	295.85	453.25	386.59	472.04
ENSG00000091106.19	0	1	0	0	0	0	0	2	0	1	0	0	0	0	0	0	0	0	0	1	0	0	0	0
ENSG00000091127.14	111	118	181	89	136	0	108	111	131	124	82	126	136	146	162	142	148	169	220	254	194	252	269	257
ENSG00000091128.13	0	0	2	1	2	0	2	0	1	1	0	0	1	2	0	0	2	3	3	4	1	5	4	4
ENSG00000091129.20	380	253	457	258	348	0	271	289	324	369	214	352	414	393	429	431	474	475	942	870	725	1040	1025	982
ENSG00000091136.14	2565	1943	2985	1700	1990	0	1830	1715	2177	2413	1421	2094	2245	2365	2613	2064	2406	2355	3788	3673	3071	4833	4580	4995
ENSG00000091137.14	1	3	4	0	2	0	2	1	3	1	0	5	3	2	1	5	0	1	1	2	4	2	2	3
ENSG00000091138.12	4	4	1	1	4	0	0	4	2	1	0	4	2	6	2	1	2	3	2	4	5	15	5	13
ENSG00000091140.14	1145	1113	1546	938	1431	0	1339	1384	1359	1472	879	1406	1302	1466	1520	1287	1461	1270	1695	1671	1375	1574	1426	1814
ENSG00000091157.13	303	293	373	261.92	384	0	303	318.38	387	350	233	373	354	376	363	318	386	355	468	434	395.41	464.02	478.54	506
ENSG00000091164.13	712	695	1012	558	883	0	808	723	829	874	553	918	795	875	976	816	893	832	1279	1262	988	1397	1280	1540
ENSG00000091181.19	1	0	0	0	1	0	0	0	0	0	0	0	0	0	0	0	0	0	0	0	0	0	0	0
ENSG00000091262.15	1926.2	2139.04	2788.67	1916.19	2883.21	0	2577.44	2695.43	2472.79	2656.95	1703.97	2888.64	2341.15	2384.25	2306.89	1894.18	2302.12	2031.58	2514.36	2447.81	2055.82	1003.3	850.5	1003.03
ENSG00000091317.8	1123	1115	1475	991	1461	0	1397	1295	1358	1454	844	1454	1327	1330	1553	1200	1359	1295	1560	1488	1335	1611	1624	1737
ENSG00000091409.15	1710	1562	2140	1397	1975	0	1887	1882	1785	1903	1161	1931	1932	2066	2343	1945	2192	1925	3014	2758	2405	5443	5765	5945
ENSG00000091428.18	68	47	59	42	59	0	68	48	47	70	31	70	67	46	53	46	97	71	80	88	71	74	81	91
ENSG00000091436.17	640	561	742	442	581	0	557	527	561	600	379	562	620	625	688	598	652	630	854	806	629	899	956	1032
ENSG00000091482.8	17	36	29	33	39	0	34	36	35	35	14	40	38	45	38	28	36	36	51	44	40	17	19	29
ENSG00000091483.6	829	864	1170	707	1256	0	1174	1118	1063	1116	715	1186	1081	1056	1190	1086	1138	1067	1413	1348	1148	1104	997	1154
ENSG00000091490.11	571	476	712	373	546	0	487	509	555	556	314	568	545	591	690	607	639	667	1089	977	798	1630	1540	1772
ENSG00000091513.16	93368	105079	130904	91678	154700	0	153388	152693	127751	127021	87352	154004	116896	126306	125890	101639	113127	98015	115928	116752	94296	75568	69093	74772
ENSG00000091527.15	4381	4202	5967	3407	5080	0	4837	4777	4670	4734	3079	4924	4745	5121	5190	4683	5100	4703	6963	6603	5314	7318	7196	8265
ENSG00000091536.19	20	21	18	26	26	0	21	23	32	15	19	33	16	23	27	15	34	18	21	31	25	16	17	16
ENSG00000091542.9	1192	1183	1576	979	1366	0	1237	1296	1399	1343	862	1515	1167	1302	1373	1127	1387	1160	1879	1695	1363	2446	2405	2732
ENSG00000091583.11	8572	8927	11653	7742	12298	0	11493	11282	11168	11279	7620	12285	10280	10834	11688	9560	10186	9766	12213	11701	9604	8512	7862	9273
ENSG00000091592.16	0	0	0	0	0	0	0	0	0	0	0	0	1.07	0	0	0	0	0	0	0	0	14	8	22
ENSG00000091622.16	134	85	159	102	109	0	99	100	127	112	76	108	96	125	144	91	135	97	164	157	130	195	216	211
ENSG00000091640.8	535	533	742	388	622	0	630	556	589	603	416	693	590	593	674	614	656	550	807	838	658	787	758	825
ENSG00000091651.9	82	50	87	36	85	0	60	74	77	85	35	80	62	68	83	90	78	70	105	128	81	85	90	87
ENSG00000091656.19	214	207	267	211	238	0	207	281	243	251	171	202	237	225	255	200	243	201	290	247	223	280	310	284
ENSG00000091664.9	0	0	0	0	0	0	0	0	0	0	1	0	0	0	0	0	0	0	0	0	0	0	0	0
ENSG00000091704.10	3	3	6	2	0	0	3	6	6	3	3	2	2	2	7	5	3	3	8	4	3	2	6	3
ENSG00000091732.16	223	210	260	203	281	0	237	263	249	247	168	267	249	236	254	236	286	244	374	382	330	330	321	356
ENSG00000091831.23	0	0	0	0	0	0	0	0	0	0	0	0	0	1	0	0	0	0	1	0	0	0	0	3
ENSG00000091844.8	8	2	5	1	6	0	1	3	3	12	3	6	5	5	5	4	5	3	10	11	5	42	62	71
ENSG00000091879.13	38	15	37	10	9	0	12	6	9	16	2	11	17	9	19	9	14	19	10	11	16	42	39	61
ENSG00000091947.10	220	216	294	174	250	0	217	248	223	217	159	245	231	245	255	256	230	226	351	359	242	366	356	410
ENSG00000091972.18	3	2	9	1	4	0	7	4	7	13	7	3	6	5	8	11	1	6	5	5	3	3	5	12
ENSG00000091986.15	11	9	25	11	17	0	5	16	7	15	9	13	10	18	16	9	9	9	14	12	9	9	11	11
ENSG00000092009.10	0	0	0	0	0	0	0	0	0	0	0	0	0	0	0	0	0	0	0	0	0	0	0	0
ENSG00000092010.15	736	803	1019	611	961	0	870	970	881	942	569	1013	868	846	968	847	1017	842	1136	1194	891	977	835	990
ENSG00000092020.10	179	154	177	155	196	0	174	185	171	186	122	194	185	176	178	210	258	175	253	259	226	244	241	311
ENSG00000092036.18	108	81.42	166	109	128	0	140.52	142	146	111.65	88	160	118	128	154	135	134.94	126	204	199	99.68	196.47	154.84	179
ENSG00000092051.17	0	0	0	0	0	0	0	0	0	0	1	1	0	0	0	0	0	0	0	0	0	1	1	0
ENSG00000092054.13	0	0	0	0	0	0	0	0	1	0	0	0	0	0	0	0	0	0	0	0	1	0	0	0
ENSG00000092067.5	0	0	0	0	0	0	0	0	0	0	0	0	0	0	0	0	0	0	0	0	0	0	0	0
ENSG00000092068.20	58	33	69	37	48	0	40	45	45	58	17	48	56	43	60	35	63	55	62	59	69	110	120	99
ENSG00000092094.11	461	414	570	356	535	0	486	485	429	489	344	464	470	498	512	454	554	470	712	845	604	668	577	648
ENSG00000092096.16	42	39	43	23	31	0	39	30	41	29	23	35	39	44	36	49	49	38	67	57	34	51	49	58
ENSG00000092098.17	420.15	431.57	632.18	343.66	582.75	0	440.75	491.83	511.11	497.77	316.83	501.27	455.82	511.68	471.37	485.09	498.95	494.79	688.38	648.99	570.81	780.29	719.93	707.89
ENSG00000092108.21	619	579	914	534	849	0	840	723	768	748	418	762	675	737	832	760	797	765	1030	1102	862	1094	1137	1240
ENSG00000092140.16	155	155	200	133	184	0	183	171	172	184	97	165	169	183	206	151	185	157	249	275	262	208	269	307
ENSG00000092148.13	3094	3016	4106	2696	3848	0	3748	3886	3615	3749	2392	3896	3631	3927	4024	3623	3751	3422	4920	4846	3999	4506	4833	5392
ENSG00000092199.17	4681.74	4480.95	6421.75	3692.82	5736.41	0	5146.32	5278.69	5293.97	5440.21	3473.33	5583.92	5190.68	5686.05	6120.01	5551.19	5812.32	5257.6	7622.74	7560.51	6016.29	7202.94	6754.58	7699.06
ENSG00000092200.12	1	3	6	2	3	0	1	6	2	1	2	3	4	5	5	3	3	1	3	1	3	11	5	4
ENSG00000092201.10	1163.91	1074.98	1607.97	993.97	1321.93	0	1176.98	1216.93	1289.94	1310.97	838.93	1361.95	1227	1405.94	1434.9	1348.93	1397.97	1308.95	1895.94	1884.96	1544.94	1596.97	1561.9	1633.81
ENSG00000092203.14	975	978	1320	892	1177	0	1060	1128	1151	1150	718	1244	1186	1271	1239	1153	1287	1094	1653	1617	1342	1694	1719	1926
ENSG00000092208.17	79	77	108	45	95	0	98	58	85	85	45	72	76	77	90	108	101	71	120	134	80	108	111	100
ENSG00000092295.12	10	11	21	12	30	0	11	19	19	25	20	24	14	18	8	16	21	13	36	31	18	24	32	33
ENSG00000092330.18	392	362	523	311	409	0	438	443	417	401	300	467	409	418	476	387	463	390	592	578	447	733	646	736
ENSG00000092345.13	0	0	0	0	0	0	0	0	0	0	0	0	0	0	0	0	0	0	0	0	0	0	0	0
ENSG00000092377.15	0	0	0	0	0	0	0	0	0	4	0	0	0	0	0	0	0	0	0	0	0	0	0	0
ENSG00000092421.16	1147	944	1340	800	983	0	849	863	992	1075	651	997	1252	1268	1437	1313	1580	1472	2724	2842	2336	5459	5405	6066
ENSG00000092439.16	1051	894	1283	825	1239	0	1190	1067	1148	1124	732	1196	1103	1143	1257	1058	1260	1142	1645	1728	1388	1628	1740	1994
ENSG00000092445.12	733	682	1001	539	853	0	670	717	817	775	531	805	741	803	925.97	742	777	719	1173	1094	860	1488	1397	1402
ENSG00000092470.12	16	11	13	1	2	0	4	7	6	8	5	5	9	11	14	5	8	6	15	15	7	11	17	18
ENSG00000092529.24	27.7	34.91	55.79	23.84	29.67	0	51.39	50.99	32.61	42.88	25.88	61.19	56.57	50.45	18.3	33.39	62.46	55.63	57.77	53.32	35.55	18.71	12.84	19.59
ENSG00000092531.10	751	653	900	512	812	0	754	744	758	709	480	760	779	770	868	699	895	834	1233	1059	886	1374	1387	1547
ENSG00000092607.15	6	6	9	3	10	0	5	6	12	10	7	8	7	14	18	7	11	7	16	21	21	8	12	23
ENSG00000092621.12	2673	2762	3672	2366	3494	0	3353	3464	3297	3127	2277	3760	3320	3536	3473	3473	3950	3328	5264	5079	3999	3143	2998	3390
ENSG00000092758.18	2	1	1	1	1	0	4	6	1	0	1	3	2	1	3	4	0	0	2	6	1	5	0	9
ENSG00000092820.18	2683	2529	3592	2179	2975	0	2917	2768	2938	2976	1846	3030	2912	3057	3362	2605	2982	2755	3862	3875	3003	4709	4547	5002
ENSG00000092841.18	8143	7805	11197	6088	9094	0	8580	8443	8892	8685	5655	9577	8546	9102	9895	8912	9904	8843	13230	12580	9768	12149	11235	12699
ENSG00000092847.12	929	834	1159	675	1031	0	902	897	989	996	573	1020	974	1004	1024	835	1049	947	1324	1246	1103	1265	1201	1282
ENSG00000092850.12	2	1	5	0	4	0	2	1	0	0	2	0	1	3	1	1	0	0	1	3	2	1	0	1
ENSG00000092853.14	23	14	29	17	15	0	11	8	14	24	7	5	20	15	21	14	16	19	19	23	12	16	22	24
ENSG00000092871.16	786	781	1080	635	989	0	890	800	947	933	665	931	939	982	1107	996	1082	888	1635	1554	1267	1531	1477	1731
ENSG00000092929.11	31	34	63	30	41	0	32	37	32	28	24	44	38	29	28	25	32	30	36	45	31	83	97	88
ENSG00000092931.11	276	284	333	217	316	0	312	290	289	317	208	281	276	341	331	342	334	316	458	470	393	583	556	629
ENSG00000092964.18	189	200	279	213	264	0	296	256	250	263	165	269	218	241	255	190	225	211	236	222	188	658	677	705
ENSG00000092969.12	774.1	542.8	881.35	435.95	494.38	0	460.1	424.78	544.93	562.23	299.9	536.47	417.02	522.25	638.53	478.47	508.4	427.37	554.1	534.73	450.15	774.46	770.61	872.82
ENSG00000092978.11	199	175	277	160	234	0	200	200	197	232	134	216	201	220	239	246	249	237	288	312	251	274	296	299
ENSG00000093000.19	788.9	727.96	1058.28	622.91	945.22	0	845	863.99	850	922.87	538.95	894.78	844.68	935.84	1020.84	865.98	952.54	854.92	1298.57	1293.91	1007	1349.1	1388.59	1544.68
ENSG00000093009.10	5	3	17	8	8	0	8	6	14	10	4	9	6	4	9	3	7	8	4	17	9	7	4	10
ENSG00000093010.13	240	266	345	168	303	0	340	341	261	326	233	368	291	303	335	244	283	246	309	282	275	136	112	149
ENSG00000093072.18	336	289	391	232	324	0	291	305	310	318	217	343	300	326	330	270	357	303	435	452	339	489	353	428
ENSG00000093100.13	539.2	705.19	814.37	471.46	711.53	0	604.01	550.29	506.66	655.3	468.47	678.04	598.91	614.34	626.35	677.76	746	722.62	1065.14	1159.64	817.92	886.03	721.58	913.19
ENSG00000093134.14	30	28	51	24	41	0	45	34	40	25	35	41	32	37	30	18	26	22	38	38	42	82	74	83
[truncated: 58,612 more rows]
