# Supplementary material for: An updated comparison of microarray and RNA-seq for concentration response transcriptomic study: case studies with two cannabinoids, cannabichromene and cannabinol
Source: BMC Genomics. 2025 Apr 23;26:392. doi: 10.1186/s12864-025-11548-3 (PMC12016467; doi:10.1186/s12864-025-11548-3)
Supplement: Supplementary file 2 — Supplementary Material 2: Table S2. Quantification of mapped reads for RNA-seq of CBN-exposed samples. [file 12864_2025_11548_MOESM2_ESM.xlsx]

## Sheet: CBN_Quantification
Table S2. Quantification of mapped reads for RNA-seq of CBN-exposed samples
Gene symbol	CBN_0µM_1	CBN_0µM_2	CBN_0µM_3	CBN_0.1µM_1	CBN_0.1µM_2	CBN_0.1µM_3	CBN_0.5µM_1	CBN_0.5µM_2	CBN_0.5µM_3	CBN_1µM_1	CBN_1µM_2	CBN_1µM_3	CBN_5µM_1	CBN_5µM_2	CBN_5µM_3	CBN_10µM_1	CBN_10µM_2	CBN_10µM_3	CBN_20µM_1	CBN_20µM_2	CBN_20µM_3
ENSG00000000003.15	2996	2577	3227	4136	3103	3396	5728	4214	3529	3912	2919	5176	3941	3027	3684	3487	3848	4242	2446	2978	2980
ENSG00000000005.6	0	0	0	0	0	0	0	0	0	0	0	0	1	0	0	0	1	0	0	0	0
ENSG00000000419.12	487	465	468	663	553	630	1156	814	626	698	502	883	709	561	660	771	789	921	716	931	819
ENSG00000000457.14	372	317	362	481	420	406	619	450	351	480	364	644	525	390	445	488	502	507	338	473	452
ENSG00000000460.17	80	74	94	102	84	95	149	110	103	117	94	164	102	109	112	114	162	143	93	130	121
ENSG00000000938.13	0	1	0	0	0	0	0	0	0	0	0	0	1	0	1	0	0	1	0	0	0
ENSG00000000971.15	9279.85	8988.4	9720.24	11954.2	10270.2	11114.9	14289.5	12275.5	9451.32	11973.6	8728.33	15132.6	11376	8162.06	10154.6	9364.02	9706.27	9857.4	7246.66	8962.1	8590.65
ENSG00000001036.14	2475	2390	2582	3404	2806	2842	4490	3573	2863	3608	2698	4418	3814	3214	3669	4201	4391	4535	3398	4619	4202
ENSG00000001084.13	1462	1418	1594	1884	1612	1667	2985	2106	1536	2586	1808	2963	4138	3645	3320	5143	5692	4911	4828	6080	5595
ENSG00000001167.14	989	959	972	1256	980	1009	1670	1238	1040	1458	1006	1719	1558	1261	1288	1613	1811	1747	1655	2364	2061
ENSG00000001460.18	109	104	116	137	93	120	220	131	96	166	112	183	148	127	136	148	179	154	129	179	167
ENSG00000001461.17	349	333	377	450	310	415	522	425	330	483	324	540	422	366	384	273	281	322	243	315	260
ENSG00000001497.16	516	475	435	555	491	532	733	658	388	670	520	742	692	605	669	725	791	741	615	862	696
ENSG00000001561.7	438	410	576	647	495	538	975	675	542	649	497	863	531	445	504	602	635	627	490	679	606
ENSG00000001617.12	17	26	30	19	23	24	39	38	25	31	23	23	28	32	28	27	32	23	14	41	41
ENSG00000001626.15	5	2	4	6	7	9	12	12	11	12	5	9	7	7	11	10	15	18	22	25	19
ENSG00000001629.10	1000	930	1107	1302	1131	1217	1727	1316	1077	1659	1088	1834	1796	1438	1411	1729	1900	1939	1639	2064	1849
ENSG00000001630.17	8648.01	9284.47	10856.6	13784.9	10841.6	11636.1	18932.3	13539.9	11499.1	12704.5	9311.64	15944.7	13724.8	10547.8	11596.5	12840.2	14858.1	13445.1	11532.4	14354.8	13145.3
ENSG00000001631.15	395.05	415.35	453.4	460.9	394.28	454.31	711.15	478.65	384.24	656.01	398.44	767.02	683.83	498.14	512.52	595.77	667.42	625.71	528.73	575.77	545.89
ENSG00000002016.18	245	234	290	322	283	300	502.08	303.01	258.18	391.3	240	445.01	414.58	329.59	342.6	357	376	334.47	211	271.17	256.95
ENSG00000002079.14	3	1	1	3	2	1	3	3	0	1	2	4	0	2	2	2	3	3	4	5	6
ENSG00000002330.13	416	402	320	528	401	369	626	528	438	398	374	543	403	283	456	384	395	490	226	327	323
ENSG00000002549.12	802	791	829	945	869	937	1308	1155	793	1090	813	1186	1164	944	1116	1116	1173	1222	846	1075	1043
ENSG00000002586.20	4642	4535	4571	5909	4836	4951	7629	6519	4919	5496	4436	6470	5744	4516	5785	5769	5614	6148	3766	5168	4405
ENSG00000002586.20_PAR_Y	0	0	0	0	0	0	0	0	0	0	0	0	0	0	0	0	0	0	0	0	0
ENSG00000002587.10	3	3	5	5	1	5	9	3	3	3	6	7	1	1	5	2	4	5	4	5	5
ENSG00000002726.20	0	4	4	3	3	3	3	0	0	1	1	0	1	0	1	2	1	3	2	1	0
ENSG00000002745.13	0	0	0	0	0	0	0	0	0	0	0	0	0	0	0	0	0	0	0	0	0
ENSG00000002746.15	1	5	2	3	9	4	0	1	5	5	2	6	3	6	4	0	3	1	0	2	6
ENSG00000002822.15	389.53	397.62	315.97	369.1	370.98	324.13	452.18	486.05	321.49	527.16	367.62	539.4	554.46	384.25	525.24	561.92	529.23	596.94	436.83	544.83	512.12
ENSG00000002834.18	14530	13841	15063	17718	14625	15324	23942	18864	15516	21328	15659	24139	23724	19816	22164	25066	26894	25077	18180	23128	21552
ENSG00000002919.14	398	399	433	507	395	387	734	562	430	546	415	621	567	502	562	688	664	699	557	809	723
ENSG00000002933.9	3702	4120	4140	5140	4350	4446	6661	5823	4500	4736	3458	5430	4267	3394	4688	4240	4276	4515	2334	3206	2909
ENSG00000003056.8	1367	1265	1391	1781	1395	1496	2659	1856	1571	1887	1441	2395	2251	1642	2106	2420	2707	2600	2749	3822	3301
ENSG00000003096.14	403	436	503	651	527	550	798	553	517	668	418	696	527	434	522	400	475	486	143	173	189
ENSG00000003137.8	180	131	116	146	91	98	215	162	119	295	174	267	295	223	259	332	374	394	397	496	518
ENSG00000003147.19	608	560	643	797	645	711	954	803	631	812	571	952	866	661	740	957	973	996	880	1194	1124
ENSG00000003249.13	1010	854	861	1001	881	931	1494	1300	934	1373	1060	1535	1950	1634	1843	2750	2779	2599	2392	3184	2793
ENSG00000003393.15	1133	1137	1315	1523	1243	1376	1945	1357	1105	1770	1228	2061	1686	1472	1461	1574	1746	1748	1343	1718	1581
ENSG00000003400.14	343	395	387	479	418	390	630	411	379	520	371	569	521	394	425	367	477	451	343	397	374
ENSG00000003402.20	948.56	898.45	922.67	1030	912.64	959.51	1397.77	1051.66	858.61	1385.79	896.12	1549.97	1452.99	1248.63	1144.51	1247.54	1283.79	1332.04	1119.65	1513.3	1340.61
ENSG00000003436.16	1282	1226	1454	1908	1456	1483	2822	1888	1746	2115	1376	2684	2095	1725	2015	3167	3674	3352	5558	7797	6348
ENSG00000003509.16	399	426	400	553	472	528	694	600	435	572	405	700	604	501	545	616	654	629	452	556	595
ENSG00000003756.17	2267	2283	2167.66	2777.92	2308.71	2429.35	3736.69	2767.4	2067.31	3391.84	2277.6	3397.23	3149	2518	2693.32	2851	3180.45	2888	2119.4	2655.21	2520.12
ENSG00000003987.14	61	55	82	93	62	78	112	63	66	89	58	91	65	60	51	85	84	65	56	83	61
ENSG00000003989.17	2504	2751	3019	3958	2852	3282	5358	3410	3141	3838	2730	4677	3568	2974	3042	3050	3703	3295	2616	3124	3014
ENSG00000004059.11	1911	1911	1735	2415	1951	2071	3022	2566	2029	2310.86	1799	2783.88	2356	1785	2491	2368.66	2448.66	2612.87	1804	2431.36	2075
ENSG00000004139.14	710.8	645.5	676.51	791	624.16	693	1040.32	737	611	956.67	678	1028.18	766	606.46	693.63	644	736.11	704.73	399	466.67	483.39
ENSG00000004142.12	3407	3778	3771	4690	3933	4133	5974	5008	3972	4680	3581	5390	4518	3530	4597	4533	4632	4702	2972	3916	3484
ENSG00000004399.12	620	450	490	504	499	445	748	559	422	834	570	910	743	579	699	869	938	846	1709	2393	1872
ENSG00000004455.17	1696.68	1679.13	1867.69	2360.05	1989.76	2038.46	3008.95	2468.65	1842.41	2250.45	1704.49	2706.55	2397.67	1872.8	2193.49	2147.88	2414.45	2367.54	1586.77	2091.82	1914.72
ENSG00000004468.13	27	24	46	39	37	35	50	39	31	33	26	51	26	16	22	13	11	18	7	7	9
ENSG00000004478.8	1197	1127	1165	1399	1224	1139	1870	1643	1194	1863	1401	1964	2629	2113	2394	3833	4102	3750	4628	6588	5329
ENSG00000004487.16	1724	1504	1800	2108	1873	1968	2756	2328	1841	2645	1858	2910	3022	2383	2653	3206	3186	3402	2489	3149	2861
ENSG00000004534.15	1592	1612	1520.34	1807.08	1721.29	1859.65	2387.31	1876.6	1402.69	2543.16	1588.4	2611.77	2562	2021	2162.68	2437	2515.55	2519	2091.6	2923.79	2710.88
ENSG00000004660.15	7	4	9	7	15	10	11	17	4	15	7	8	11	16	13	21	22	15	22	30	28
ENSG00000004700.16	487	441	589	721	479	618	969	633	585	729	491	887	756	613	665	734	855	793	682	941	790
ENSG00000004766.17	456	379	497	592	513	566	885	601	525	701	553	815	700	595	588	678	764	691	594	818	773
ENSG00000004776.13	3	2	6	2	0	2	9	3	4	6	4	4	10	4	10	3	3	2	2	1	1
ENSG00000004777.18	51	45	48	42	37	38	58	39	25	54	31	48	46	31	38	30	30	29	53	73	42
ENSG00000004779.10	771	798	890	1353	954	1072	1797	1330	1003	973	781	1378	1023	731	999	987	989	1243	664	906	822
ENSG00000004799.8	49	60	69	85	66	95	140	50	60	78	49	81	78	57	57	39	57	36	23	31	27
ENSG00000004809.14	0	0	0	1	1	1	0	1	0	0	3	1	1	3	2	2	1	0	1	0	2
ENSG00000004838.14	15	16	4	7	20	9	13	15	14	11	8	20	7	12	8	4	12	8	5	1	3
ENSG00000004846.16	0	0	0	1	1	4	1	3	0	4	0	0	0	0	2	1	1	0	1	2	0
ENSG00000004848.8	7	7	4	4	1	4	6	7	4	7	6	6	4	1	7	7	6	8	2	1	3
ENSG00000004864.13	1889	2000	2188	2768	2216	2279	3659	2814	2282	2710	1992	3494	3068	2325	2787	3128	3517	3118	3093	4199	3652
ENSG00000004866.20	605.96	581	728	854.64	673	694	1034	904.92	681.24	848	675.65	1016.32	902	710	789.75	922	1019	948	739	989.34	916.16
ENSG00000004897.12	1432	1432.84	1610	2027	1706	1740	3050	1947	1581	2210	1540	2704	2176	1720	1888.96	1900	2169	2107	1572	2131	1979
ENSG00000004939.15	0	0	1	1	0	0	0	0	0	0	0	0	0	0	0	0	1	0	0	1	1
ENSG00000004948.15	0	0	0	0	0	0	0	0	1	0	0	0	1	0	0	0	0	0	0	2	2
ENSG00000004961.15	432	423	507	626	447	512	862	676	494	672	497	802	793	589	703	825	876	860	720	975	876
ENSG00000004975.12	1052	1147	1057	1363	1132	1162	1776	1381	1045	1401	1033	1519	1597	1253	1445	1774	1800	1693	1476	2196	1823
ENSG00000005001.10	43	47	33	58	32	45	73	83	46	72	41	79	71	53	86	142	136	109	244	327	243
ENSG00000005007.12	3234	3229	3020	3238	3230	3262	4375	3817	2724	4528	3297	4812	4635	3857	4163	4406	4471	4535	3888	5075	4564
ENSG00000005020.13	332	323	432	421	346	346	544	421	301	500	353	575	542	416	417	592	636	586	515	700	619
ENSG00000005022.6	3654	3576	3779	5068	4083	4336	6197	5448	4244	4638	3541	5859	4889	3734	4907	5018	5285	5966	4362	6079	5504
ENSG00000005059.16	15	12	10	12	11	20	28	10	11	16	22	15	16	16	13	23	30	26	7	19	21
ENSG00000005073.5	0	0	0	0	0	0	1	0	0	0	0	0	0	1	0	0	0	0	0	0	1
ENSG00000005075.15	772.17	717.92	757.4	935.97	773.13	801.66	1217.63	1072.55	849.32	852.52	627.04	1059.62	933.52	732.19	973.22	990.19	1021.76	1180.11	704.5	936.92	774.14
ENSG00000005100.13	415	396	427	501	425	436	700	436	411	696	464	684	727	550	583	727	879	738	714	933	879
ENSG00000005102.13	0	0	0	0	0	0	0	0	0	0	0	0	0	0	0	0	0	0	0	0	0
ENSG00000005108.16	40	43	42	40	28	23	66	46	35	65	45	87	90	68	76	109	147	117	203	291	224
ENSG00000005156.12	596	536	625	798	651	664	1006	842	654	916	604	961	941	820	822	908	1073	988	755	1098	993
ENSG00000005175.10	540	482	533	646	512	539	817	709	461	817	569	934	843	772	741	925	976	979	851	1237	1043
ENSG00000005187.12	636	509	525	718	592	632	763	700	547	687	472	895	613	397	508	418	444	472	151	177	155
ENSG00000005189.19	115	123	132	138	130	111	186	177	145	137	94	193	123	116	133	89	104	118	51	64	61
ENSG00000005194.15	834	788	881	1072	857	894	1509	1113.95	920	1138	838	1373	1146	954	1205.99	1246	1351	1433	1045	1361	1321
ENSG00000005206.17	1771	1981	1782	2252	1789	1802	3128	2333	1894	2368	1832	2579	2286	2072	2185	2176	2329	2127	1251	1686	1468
ENSG00000005238.19	412	360	371	521	397	458	655	546	405	589	402	591	549	466	535	703	688	614	845	1246	948
ENSG00000005243.10	70	113	98	132	118	118	152	165	109	95	104	165	137	90	125	78	90	100	67	78	59
ENSG00000005249.13	17	25	35	40	26	18	30	36	20	25	23	44	29	27	21	24	36	22	17	28	21
ENSG00000005302.19	487	391	449	558	427	421	746	574	512	605	416	697	602	491	551	597	675	634	532	694	646
ENSG00000005339.14	1898	1748	1732	1869	1727	1828	2396	1988	1567	2976	1974	3003	2852	2303	2304	2565	2715	2726	2351	2916	2837
ENSG00000005379.17	92	109	92	99	89	101	137	110	90	145	89	125	132	103	133	85	128	124	41	34	43
ENSG00000005381.8	0	0	0	0	0	0	0	0	0	0	0	0	0	0	0	0	0	0	1	0	0
ENSG00000005421.9	150	169	196	272	231	210	335	258	229	212	148	216	173	136	170	146	173	159	80	73	88
ENSG00000005436.14	683	618	681	887	749	755	1205	903	680	983	721	1222	1121	786	900	1077	1088	1141	803	909	886
ENSG00000005448.16	17	19	14	26	21	21	33	27	15	41	23	45	27	20	35	23	21	36	7	13	19
ENSG00000005469.11	962	819	1014	1372	1029	1091	1702	1259	1024	1306	930	1643	1293	870	1075	982	1010	1115	455	516	593
ENSG00000005471.17	232	257.81	269.8	296.85	235	275	403.94	326	239.75	368	250	394.87	330.77	242	315.94	319.67	294	325	239.69	410.71	329.71
ENSG00000005483.21	957	950	919	1058	978	1025	1315	1084	876	1434	988	1597	1291	1013	1089	1083	1155	1112	793	877	874
ENSG00000005486.17	1364	1344	1468	1783	1479	1334	2483	2000	1656	1738	1415	2060	1833	1511	1985	2147	2287	2292	1950	2682	2198
ENSG00000005513.10	6	3	4	0	4	1	7	3	2	7	2	6	3	4	1	12	13	5	38	87	39
ENSG00000005700.15	2110	1967	2369	3160	2308	2626	4172	2836	2588	3571	2456	4432	3965	3109	3208	4264	4952	4378	4589	5901	5266
ENSG00000005801.18	772	659	705	913	750	803	1332	970	682	1272	789	1286	1664	1243	1278	1902	2100	1754	1907	2436	2222
ENSG00000005810.18	748	731	760	895	769	814	1174	784	704	1142	833	1289	1129	1064	981	1075	1228	1250	1003	1255	1235
ENSG00000005812.11	607	618	693	896	613	770	1220	812	727	980	715	1140	920	706	786	832	1029	1013	861	1083	899
ENSG00000005844.18	273	323	301	359	347	376	494	363	323	403	234	370	282	194	240	171	153	146	34	23	29
ENSG00000005882.12	380	409	443	519	386	419	632	533	363	488	403	538	421	288	401	276	303	289	115	110	142
ENSG00000005884.18	211	190	210	222	183	176	250	229	144	327	235	318	263	195	232	278	249	277	500	806	600
ENSG00000005889.15	1210	1146	1394	1757	1325	1439	2387	1445	1354	1924	1260	2081	1739	1390	1486	1476	1717	1652	1241	1573	1526
ENSG00000005893.15	3848	3556	4238	5272	3979	4444	7055	5502	4370	5468	3971	7033	5502	4514	5104	5851	6702	6568	5868	7349	6749
ENSG00000005961.19	5	10	6	6	2	5	9	2	4	7	7	5	4	5	11	6	18	8	7	15	6
ENSG00000005981.13	0	0	4	4	1	0	1	0	0	3	0	1	0	1	0	0	1	3	0	0	0
ENSG00000006007.12	1600	1584	1812	2125	1761	1843	2750	2251	1793	2068	1567	2519	2136	1651	2151	2177	2258	2385	1987	2477	2265
ENSG00000006015.17	679	665	626	781	697	654	1117	904	747	774	677	956	919	780	977	962	887	944	495	765	674
ENSG00000006016.11	0	0	0	2	0	0	0	1	0	1	0	0	2	0	2	0	3	1	0	0	0
ENSG00000006025.12	161	178	146	211	189	184	274	225	177	286	214	215	238	210	230	206	214	207	139	208	166
ENSG00000006042.12	958	849.99	1057	1249	991	1014	1544.98	1271	1090	1213	891	1481.97	1320.99	1109	1270.99	1432	1499.99	1527	1049	1281	1167
ENSG00000006047.13	36	60	62	66	63	54	76	54	48	69	68	88	58	58	58	57	78	54	10	42	36
ENSG00000006059.4	0	0	0	0	0	0	0	0	0	0	0	0	0	0	0	0	0	0	0	0	0
ENSG00000006062.17	171	147	176	183	217	188	251	245	165	285	186	268	265	282	260	331	369	351	385	530	465
ENSG00000006071.14	1	2	2	0	0	0	0	1	1	0	3	3	0	3	2	1	4	5	2	11	5
ENSG00000006116.3	7	7	6	11	8	3	13	9	9	7	14	8	7	3	13	1	5	9	2	3	4
ENSG00000006118.14	743	639	560	706	596	594	855	775	618	1015	730	1099	1108	903	1119	1324	1382	1384	1378	2080	1695
ENSG00000006125.18	3172.98	3226.98	3637.98	4303.99	3329.97	3661.99	5598.99	4032.99	3612.99	4760.98	3503.99	5752.98	4785.96	3924.99	4329.97	5067.96	5614.99	5122.95	5247.86	6958.97	5849.98
ENSG00000006128.12	0	0	0	0	0	0	0	0	0	0	0	0	2	0	2	9	10	8	125	256	131
ENSG00000006194.10	643	660	586	804	735	715	963	780	593	1040	734	1051	1068	834	894	1058	1179	1061	1042	1430	1221
ENSG00000006210.7	901	785	729	924	819	813	1175	899	776	914	705	1149	648	522	773	370	452	501	120	145	191
ENSG00000006282.21	1412	1255	1202	1465	1312	1297	1902	1451	1204	1845	1384	1872	1912	1535	1718	1787	1814	1800	1018	1418	1229
ENSG00000006283.18	1	2	3	0	2	6	2	4	3	7	2	2	7	10	6	9	14	5	16	15	11
ENSG00000006327.13	3708	2890	2995	4056	3295	2979	5521	4552	3744	4740	3925	5479	6713	5464	6801	9389	9824	9986	10074	15849	12157
ENSG00000006377.11	0	0	0	0	0	0	0	0	0	0	0	0	0	0	0	0	0	0	0	0	0
ENSG00000006432.15	519	459	553	724	495	531	908	652	572	853	606	967	928	805	665	990	1150	1021	1240	1618	1469
ENSG00000006451.8	986	901	968	1349.98	1021	1153	1781	1363	1092	1438	948	1774	1554	1216.99	1434.99	1687	1924.99	1773.98	1616	2341	1921
ENSG00000006453.14	2405	2043	2191	2521	2141	2318	3200	2630	2040	3237	2244	3707	3447	2648	3088	3939	4300	4051	4209	5267	4979
ENSG00000006459.11	320	376	336	465	337	414	641	430	327	523	331	555	498	450	412	513	565	498	670	859	703
ENSG00000006468.14	23	9	17	19	9	15	26	25	25	26	26	44	44	37	42	41	54	39	26	44	25
ENSG00000006530.18	608	538	567	773	602	699	985	789	644	789	628	1015	847	682	827	809	969	835	664	927	798
ENSG00000006534.16	178	185	165	238	163	180	235	215	132	201	188	239	153	112	178	145	116	160	51	60	66
ENSG00000006555.11	15	19	24	37	15	28	38	31	18	31	17	24	22	16	28	18	27	25	27	28	21
ENSG00000006576.16	240	197	237	289	183	253	383	233	252	309	238	395	286	230	294	321	404	374	492	635	577
ENSG00000006606.8	0	0	2	1	2	0	0	0	1	0	1	3	0	3	2	3	2	2	3	4	2
ENSG00000006607.14	443	490	531	576	459	518	866	585	511	693	499	746	869	733	667	940	1117	898	799	1059	962
ENSG00000006611.16	171	166	161	207	153	158	249	236	172	232	137	261	209	165	255	202	227	248	107	129	162
ENSG00000006625.18	364	327.44	385.53	496.83	409.31	446.91	695	565	418.79	537.95	349.99	584.76	537.92	374	483.95	495.99	490.29	554	325.51	370.37	416.55
ENSG00000006634.8	149.7	138.72	152.78	235.62	194.53	211.53	267.14	263.51	168.82	309.1	183.8	314.12	303.5	213.33	222.62	296.86	307.91	319.02	270.49	386.03	331.92
ENSG00000006638.11	0	0	0	0	0	0	1	1	0	0	0	0	1	1	0	0	0	0	0	0	0
ENSG00000006652.14	1106	972	1043	1322	1036	1185	1910	1296	1068	1604	1086	1819	2022	1635	1708	2592	2871	2459	2936	3760	3212
ENSG00000006659.13	0	0	0	0	0	0	0	0	1	0	0	0	0	0	0	0	0	0	0	0	0
ENSG00000006695.12	458.97	465.07	464.62	654.67	469.19	445.85	771.92	599.62	492.08	582.41	402.58	712.2	681.82	547.39	604.68	723.93	834.36	778.03	677.06	829.72	702.27
ENSG00000006704.10	337	295	282	332	263	270	405	331	259	470	286	521	553	467	457	666	691	656	751	1054	943
ENSG00000006712.15	860	749	704	936	872	832	1157	1110	832	1062	846	1313	1279	991	1238	1500	1320	1408	1191	1801	1521
ENSG00000006715.16	1205	1128	1227	1626	1152	1391	2178	1483	1208	1690	1262	2094	1733	1430	1467	1647	1918	1840	1551	2092	1803
ENSG00000006740.17	160	140	148	153	155	142	200	203	106	184	153	244	223	151	215	233	238	248	212	295	204
ENSG00000006744.19	1505	1467	1490	1777	1569	1577	2252	2110	1465	2064	1594	2424	2401	1862	2026	2321	2364	2384	1792	2322	2065
ENSG00000006747.15	6	3	2	8	11	3	4	5	7	4	8	12	8	6	5	5	6	2	3	2	2
ENSG00000006756.16	1760	1777	1943	2176	1832	1924	3009	2279	1717	2705	1857	2967	2700.99	2238	2427	2555	2865	2668	2052	2807	2432
ENSG00000006757.12	683	673	664	919	708	772	1268	922	748	783	607	923	849	672	845	892	962	969	499	627	567
ENSG00000006788.14	0	0	0	0	0	1	0	1.03	0	0	0	0	0	0	0	0	0	0	1.01	0	2.03
ENSG00000006831.10	1493	1393	1618	1931	1478	1689	2689	1999	1632	2110	1545	2651	2362	1801	1996	2468	2654	2459	2818	3765	3362
ENSG00000006837.12	11.02	16.02	9.67	35.88	19.62	29.65	59.74	42.61	22.69	38.46	18.53	35.78	32.59	20.36	19.7	34.57	24.85	27.88	30.14	29.51	22.19
ENSG00000007001.12	18	24	30	34	25	35	36	28	26	19	20	34	7	10	6	2	6	10	2	4	1
ENSG00000007038.11	0	0	0	0	0	1	0	0	0	0	0	0	0	2	0	2	0	0	0	0	0
ENSG00000007047.15	662	676	577	656	709	622	872	827	586	954	705	974	1058	816	944	1069	1158	1145	1100	1550	1293
ENSG00000007062.11	1044	575	764	976	727	731	1263	1046	791	1310	829	1623	1227	981	1171	1332	1482	1569	1246	1513	1682
ENSG00000007080.11	913	754	741	924	807	692	1274	1075	833	903	831	988	1019	912	1171	1375	1255	1383	982	1531	1180
ENSG00000007129.18	0	0	0	0	0	0	0	0	0	0	0	0	0	0	0	0	0	0	0	0	0
ENSG00000007168.13	2306	2298	2444	2968.39	2442	2515	3882	2969	2436	3463.75	2401.52	4117	3754	2865.73	3187.35	3819	4149.21	4011	3660.73	4755	4225.97
ENSG00000007171.18	11	7	3	3	6	3	8	10	3	7	5	9	5	4	3	5	5	3	14	16	9
ENSG00000007174.18	0	0	0	0	0	0	0	0	1	0	0	0	0	0	0	0	0	0	0	0	0
ENSG00000007202.15	3044	3088	3311	3841	3131	3401	5154	3984	3227	4846	3176	5370	4657	4048	4054	4301	4973	4901	3732	5015	4560
ENSG00000007216.14	45	64	57	61	53	65	62	68	64	52	45	63	34	25	39	17	21	39	3	3	3
ENSG00000007237.18	32	24	37	35	19	14	30	31	24	47	24	50	42	41	43	27	42	58	45	70	57
ENSG00000007255.10	369	375	352	479	337	378	638	515	384	387	346	464	404	352	440	390	410	472	294	385	336
ENSG00000007264.15	0	0	0	0	0	0	0	0	0	0	0	0	0	0	0	0	1	0	0	0	0
ENSG00000007306.15	0	0	0	0	0	0	0	0	0	0	0	0	0	0	0	0	0	0	0	0	0
ENSG00000007312.12	0	0	0	0	0	0	0	0	0	0	1	0	0	0	1	0	0	0	0	0	1
ENSG00000007314.12	59	49	58	51	62	53	81	54	56	90	48	130	131	124	138	254	257	210	340	359	357
ENSG00000007341.19	207	180	213	236	240	219	340	263	224	269	194	346	340	243	279	295	313	318	295	350	323
ENSG00000007350.17	0	0	0	0	0	0	0	1	0	0	1	0	0	0	0	0	0	0	0	0	0
ENSG00000007372.23	0	0	0	0	0	0	3	0	1	1	1	0	0	0	0	0	0	0	1	5	0
ENSG00000007376.8	380	386	322	467	404	390	639	513	418	492	422	534	603	508	595	651	742	728	615	878	766
ENSG00000007384.15	926	771	769	974	783	674	1275	1095	803	1188	891	1313	1399	1136	1386	1675	1759	1453	1414	1962	1716
ENSG00000007392.16	866	712	787	916	860	864	1249	934	762	1203	803	1230	1381	1153	1136	1333	1378	1250	1025	1345	1359
ENSG00000007402.11	24	19	28	20	20	17	28	11	16	41	16	29	31	16	11	21	15	18	19	14	11
ENSG00000007516.13	218	269	204	262	255	235	349	303	238	351	229	321	296	248	279	189	232	177	99	96	96
ENSG00000007520.4	1142	1073	956	1233	1029	1058	1655	1479	1125	1332	1119	1450	1555	1298	1574	1631	1715	1806	1214	1754	1583
ENSG00000007541.16	596.84	585.98	564.87	729.96	554	532.28	919.2	780	632.36	849.61	626.81	904	854.28	689.27	827.45	800.05	953.05	889.33	618	835.82	732.45
ENSG00000007545.15	556.13	535.7	534.61	673.36	564.89	581.25	982.84	625.98	504.95	938.01	645.42	831.36	888.55	652.63	739.64	844.62	1031.44	826.9	723.24	858.42	850.36
ENSG00000007866.21	762	737	669	770	740	721	1075	872	734	1111	747	1157	1126	800	1001	1143	1169	1133	962	1473	1248
ENSG00000007908.16	0	0	0	0	1	0	1	0	0	0	0	1	0	0	0	0	0	0	0	0	0
ENSG00000007923.16	1233	1158	1190	1433	1239	1334	1884	1517	1125	1641	1237	1857	1742	1454	1706	1770	1752	1915	1391	1771	1678
ENSG00000007933.13	4	2	8	1	8	7	7	8	5	1	5	8	3	2	2	0	0	1	0	0	0
ENSG00000007944.15	68	61	60	90	70	64	113	65	64	91	67	89	75	62	67	93	82	83	67	108	75
ENSG00000007952.18	1	0	0	0	0	0	1	0	0	1	2	0	1	0	0	0	0	0	0	2	0
ENSG00000007968.7	2	0	1	2	0	2	0	5	1	8	2	7	5	1	2	4	3	3	0	0	1
ENSG00000008018.9	2174	2086	2189	3130	2473	2594	4024	3349	2603	2702	2254	3742	2994	2311	3067	3128	3303	3650	2649	3430	3316
ENSG00000008056.14	7	10	14	9	7	11	15	15	10	3	9	11	13	11	16	15	11	17	10	20	8
ENSG00000008083.14	491	489	459	523	502	491	742	538	409	715	490	749	661	571	612	513	566	583	328	464	438
ENSG00000008086.12	249	195	260	313	264	289	430	301	310	382	229	455	371	321	312	299	402	369	279	374	320
ENSG00000008118.10	0	0	0	0	0	0	0	1	0	0	0	2	0	1	0	0	0	1	0	0	0
ENSG00000008128.23	423.24	415.21	388.81	401.6	461.76	409.1	591.51	535.21	379.07	670.22	442.46	635.35	719.14	487.73	625.77	654.73	650.11	701.77	610.13	727.58	675.33
ENSG00000008130.15	1765	1814	1732	2291	1812	1965	2981	2407	1933	2530	2021	2887	2883	2434	2821	3071	3362	3218	2392	3119	2863
ENSG00000008196.13	0	0	0	0	0	0	0	0	0	0	1	0	0	0	0	0	0	0	0	0	0
ENSG00000008197.4	0	0	0	0	0	0	0	0	0	0	0	0	0	0	0	0	0	0	0	0	0
ENSG00000008226.20	31	16	27	30	16	22	31	22	12	25	41	37	47	19	40	33	36	37	18	11	9
ENSG00000008256.16	259	266	249	309	257	229	505	373	273	429	311	460	499	382	426	561	595	527	546	748	674
ENSG00000008277.14	58	57	57	105	53	49	102	64	50	76	64	99	79	65	72	65	67	48	25	28	32
ENSG00000008282.8	1663	1554	1889	2446	1787	1996	3600	2516	2200	2479	1841	3240	2846	2159	2495	2810	3070	3030	2537	3456	3071
ENSG00000008283.16	340	333	349	462	351	368	573	410	366	476	330	493	393	314	358	332	339	371	190	274	216
ENSG00000008294.21	1911	1733	1913	2343	1941	2181	3114	2268	1746	2858	2064	3154	3125	2696	2424	3289	3751	3221	5062	7571	5831
ENSG00000008300.17	323	360	271	327	317	337	487	368	274	426	333	501	463	433	386	491	540	452	370	484	459
ENSG00000008311.15	864	1109	1098	1285	1158	1313	1891	1213	947	1461	1020	1469	1060	804	786	614	702	662	354	420	451
ENSG00000008323.15	1102	1236	1121	1381	1309	1425	1698	1565	1239	1682	1254	1796	1681	1476	1739	1646	1555	1702	781	1070	826
ENSG00000008324.11	187	144	173	216	178	167	281	211	184	206	135	233	204	143	178	224	219	288	206	295	282
ENSG00000008382.15	428	435	392	567	483	497	683	636	457	598	485	629	629	461	631	532	533	599	308	445	409
ENSG00000008394.13	6167	6381	7262	9862	7703	8343	13870	10773	8742	9025	7111	11991	12495	9864	12487	14786	15119	16058	10542	13733	12885
ENSG00000008405.12	401	346	390	511	372	445	632	517	389	584	404	708	555	410	458	603	708	726	801	1066	791
ENSG00000008438.5	0	0	0	0	0	0	0	0	0	0	0	0	0	0	1	0	0	0	0	0	0
ENSG00000008441.16	242	255	243	236	222	212	298	254	212	320	257	406	387	264	329	325	330	347	304	431	328
ENSG00000008513.16	2609	2914	3052	3580	3074	3264	5096	3600	2820	3955	2860	4472	3535	3097	3350	3492	3904	3484	3979	5457	4515
ENSG00000008516.17	43	39	33	44	42	28	48	37	25	40	36	69	46	39	38	47	49	39	31	71	46
ENSG00000008517.16	9925	8997	9185	11489	9533	9797	13413	13366	10568	12148	8683	14044	14046	10536	14912	17294	17465	18828	15112	20952	17607
ENSG00000008710.19	1437.11	1548.88	1426.49	1712.46	1417.23	1537.36	2416.95	1475.18	1331.6	2238.47	1566.56	1996.82	2140.26	1958.13	1762.04	2044.36	2319.75	1989.12	1953.72	2829.49	2251.08
ENSG00000008735.14	79	117	92	112	94	107	165	102	79	126	97	112	120	102	139	189	197	145	249	379	229
ENSG00000008838.20	1543	1444	1407	1715	1565	1519	2317	1716	1374	1905	1432	2138	1834	1505	1652	1720	1895	1768	1212	1657	1408
ENSG00000008853.16	876	915	841	1003	991	981	1226	1050	767	1210	998	1388	1220	1010	1098	1098	1083	1179	707	872	837
ENSG00000008869.12	696	700	772	968	757	777	1300	866	784	1048	730	1171	1047	851	829	992	1150	963	792	971	946
ENSG00000008952.17	2263	2254	2469	3015	2434	2743	4077	3211	2514	3483	2539	4308	3675	2797	3113	3498	3745	3700	3102	4243	3663
ENSG00000008988.9	6879.09	5894.54	6385.43	9028.74	6786.15	7307.53	10795.7	9356.15	7195.05	7257.61	5640.65	9660.99	7944.22	5822.24	7840.12	8372.28	8644.67	10550.3	6625.89	9887.65	8878.33
ENSG00000009307.16	8561	8325	9088	11053	9370	9900	14284	11664	9052	12469	8848	14962	13323	10239	11733	12956	14267	14069	11839	15441	13896
ENSG00000009335.18	1754	1649	1913	2207	1723	1802	3430	2280	1924	2568	1845	3023	2745	2389	2400	2575	3150	2983	2543	3339	2975
ENSG00000009413.15	740	693	771	989	701	922	1354	909	802	1211	806	1519	1205	1038	970	980	1151	1105	724	837	898
ENSG00000009694.13	168	176	199	264	170	233	256	187	185	209	165	213	112	106	115	64	60	66	22	24	25
ENSG00000009709.12	0	0	0	0	0	0	0	0	0	0	0	0	0	0	0	0	0	0	0	0	0
ENSG00000009724.17	1152	1230	1127	1453	1354	1334	1987	1787	1391	1297	1108	1668	1379	1207	1657	1537	1532	1619	774	1078	989
ENSG00000009765.14	490	602	670	754	632	677	1057	720	597	856	653	955	704	588	574	520	532	531	238	242	256
ENSG00000009780.15	136	113	101	192	156	163	239	166	152	215	144	234	215	164	191	171	214	209	148	205	147
ENSG00000009790.15	0	1	0	0	0	1	0	0	0	0	0	1	0	0	0	0	0	0	0	0	0
ENSG00000009830.11	614	615	604	761	665	661	1100	838	725	972	655	1033	1034	886	991	1260	1470	1345	1425	1970	1639
ENSG00000009844.16	968	931	1097	1391	993	1151	1818	1385	1191	1416	1001	1873	1581	1210	1382	1496	1686	1684	1266	1739	1540
ENSG00000009950.16	3507	4295	3652	4619	4347	4310	6380	4760	3557	5282	3865	5276	4887	3945	4475	3865	4034	3609	1906	2372	2291
ENSG00000009954.11	1418	1452	1402	1575	1483	1551	1968	1682	1221	2381	1586	2501	2391	2155	1982	2537	2614	2640	2422	3146	2803
ENSG00000010017.13	896	771	880	1035	938	949	1360	1147	847	1236	876	1379	1367	980	1173	1378	1419	1412	1374	1702	1437
ENSG00000010030.14	5	5	4	6	8	6	5	3	3	8	3	12	2	5	2	8	10	9	1	2	2
ENSG00000010072.16	260	212	235	291	242	258	443	309	295	326	253	429	338	287	316	357	405	407	322	429	362
ENSG00000010165.20	619	590	532	641	578	700	812	696	553	847	565	963	916	774	869	975	1040	1034	846	1163	1011
ENSG00000010219.13	270.88	246	257	346.3	290.05	285	473.07	306.88	270.78	334.06	275	393.93	289.68	197.06	312.3	283.3	318.82	373.39	194	283.83	242.06
ENSG00000010244.18	2672	2507	2809	3654	2684	3076	4763	3392	2882	3919	2672	4612	4143	3342	3447	3932	4315	4179	3596	4728	4321
ENSG00000010256.11	4573	4734	4620	6073	5136	5024	6995	6591	5086	5610	4278	6658	5589	4278	5911	5505	5652	6141	3788	5175	4723
ENSG00000010270.13	683	627	738	955	712	735	1387	966	861	1022	676	1348	1115	895	983	1260	1335	1480	1294	1766	1538
ENSG00000010278.14	40	43	44	77	59	61	98	74	57	69	48	75	57	53	51	95	97	96	282	524	354
ENSG00000010282.15	0	0	1	0	2	1	0	0	0	2	0	1	2	2	1	1	2	0	0	2	1
ENSG00000010292.13	556	558	467	588	567	596	741	611	466	778	523	802	755	574	686	698	706	672	506	663	596
ENSG00000010295.19	534	531	488	597	549	532	808	685	549	702	559	733	724	599	695	604	650	672	303	489	393
ENSG00000010310.9	105	83	82	96	93	75	151	105	81	132	86	130	139	131	134	164	192	163	229	354	281
ENSG00000010318.21	82	75	107	110	98	74	134	75	77	109	79	114	107	76	112	113	123	114	78	108	101
ENSG00000010319.7	19	20	35	28	30	23	40	54	35	81	39	58	135	140	99	174	196	163	109	97	118
ENSG00000010322.16	2092	2342	2293	2511	2378	2280	3526	2628	2044	3154	2313	3199	3138	2749	2781	3042	3272	3048	2230	2856	2497
ENSG00000010327.10	5	7	4	6	3	3	7	2	5	8	10	12	8	4	8	4	4	6	3	2	4
ENSG00000010361.14	162	133	155	208	136	110	248	199	142	181	144	166	197	143	192	150	183	222	107	126	152
ENSG00000010379.16	69	67	55	60	62	58	80	59	71	96	47	65	49	67	45	46	50	47	13	15	26
ENSG00000010404.18	775.45	711.8	833.01	982.33	768.64	756.78	1396.21	954.9	745.1	1206.58	726.15	1297.25	1126.21	1039.29	1037.77	1662.56	1820.62	1583.47	2663.15	3827.97	2909.45
ENSG00000010438.16	9	6	8	7	3	5	11	4	7	3	1	9	10	4	6	14	7	14	2	4	11
ENSG00000010539.11	271	228	274	300	262	297	395	289	244	401	289	430	400	313	309	400	374	378	308	384	377
ENSG00000010610.10	941	1126	1081	1319	1032	1132	1812	1342	1113	1115	870	1446	803	604	899	661	675	704	302	355	382
ENSG00000010626.15	119.1	98.17	81.69	94.68	83.35	98.14	111.76	99.91	50.94	107.2	81.18	132.45	106.58	94.12	99.75	109.03	92.01	122.94	71.26	86.76	98.63
ENSG00000010671.15	0	0	3	0	0	0	0	0	0	0	0	1	0	0	0	0	0	0	0	0	0
ENSG00000010704.18	168	153	165	236	191	195	310	234	175	244	171	275	232	204	186	170	232	177	74	104	88
ENSG00000010803.16	696	681	650	841	707	744	1121	872	723	956	738	1046	948	848	943	1071	1201	1033	1006	1308	1053
ENSG00000010810.17	293	199	222	247	195	210	347	270	209	357	257	441	400	308	301	539	606	561	820	1176	967
ENSG00000010818.10	438	343	369	490	341	348	658	416	395	646	440	723	508	500	463	558	660	624	1096	1469	1201
ENSG00000010932.17	39	53	57	70	69	56	80	87	46	53	39	86	42	20	46	12	14	14	3	1	5
ENSG00000011007.12	1800	1789	1957	2117	1912	2090	2720	2271	1733	2517	1778	2823	2383	1972	2046	2332	2505	2435	2295	3094	2750
ENSG00000011009.11	1804.28	1650.57	1753.52	2230.28	1713.34	1672.54	2789.96	2311.54	1973.58	2163.39	1738.71	2700.56	2408.67	1908.64	2590.33	3115.09	3183.59	3130.9	2886.48	3693.74	3364.5
ENSG00000011021.23	1363.75	1385	1553	1827	1488	1553	2381	1648	1501.1	2062	1408	2130	1804	1613	1701	1962	2083	1741	1565	2067	1842.01
ENSG00000011028.14	2	2	2	4	4	4	3	8	6	4	6	7	8	5	3	10	6	3	9	17	11
ENSG00000011052.21	43.54	62.06	19.05	43.87	81.65	21.78	36.21	96.44	35.27	83.12	45.59	47.02	46.46	80.11	37.64	119.22	48.09	48.63	70.85	116.67	76.29
ENSG00000011083.9	0	0	0	0	0	0	0	0	0	0	0	0	2	0	0	0	0	0	0	0	0
ENSG00000011105.14	1182	1400	1498	1603	1334	1497	2243	1751	1401	1805	1398	1911	1733	1349	1612	1501	1642	1592	1015	1348	1178
ENSG00000011114.15	881	856	1010	1116	925	1094	1664	1136	1015	1463	967	1704	1353	1180	1173	1435	1670	1424	1278	1704	1559
ENSG00000011132.12	493	465	490	628	453	448	811	650	469	646	511	753	756.85	615.76	702	830	844.75	818	683	919	748
ENSG00000011143.16	207	215	220	251	233	214	282	277	215	251	205	306	248	207	266	228	284	257	110	142	155
ENSG00000011198.10	447	408	423	637	522	578	823	625	432	644	551	780	612	506	569	679	752	711	850	1157	951
ENSG00000011201.12	22	17	37	28	26	28	40	27	19	34	23	44	33	36	34	25	46	27	41	49	31
ENSG00000011243.18	2163	2147	1872	2501	2176	2118	3053	2597	1952	3006	2220	3055	2992	2481	2650	2877	2826	2918	1941	2628	2427
ENSG00000011258.16	468	482	445	613	474	520	819	540	563	727	495	801	641	511	541	573	694	627	481	595	563
ENSG00000011260.14	302	258	332	339	309	342	511	402	324	422	315	514	546	438	491	622	637	594	645	805	798
ENSG00000011275.18	985	902	901.43	1120.4	920.41	999	1484.98	1162.47	920	1515.51	1051.47	1518	1490.93	1273.96	1396.95	1532.88	1728.9	1672.48	1564.44	1967.33	1772.41
ENSG00000011295.16	724.36	686	772	925	776	780	1190.35	978	786	1124	758	1342.14	1202	993	1081	1241	1483	1378.35	1457	1865.71	1602
ENSG00000011304.20	5763	5693	5628	7118	5878	5827	9602	7802	6162	8278	6614	9283	9777	8120	9087	10602	11470	10777	9582	13057	11392
ENSG00000011332.19	1	1	0	3	2	2	6	1	4	7	1	2	2	4	6	2	7	7	7	8	6
ENSG00000011347.9	1565	1751	1607	2060	1674	1906	3104	2039	1426	1938	1470	2797	1320	1086	1538	1195	1068	1095	719	993	942
ENSG00000011376.12	760	767	782	908	798	789	1138	951	719	1048	745	1138	1075	856	975	1002	1039	1034	687	977	842
ENSG00000011405.13	1895	1975	2239	2781	2205	2467	3791	2409	2343	3089	2144	3978	3319	2612	2673	3281	3799	3278	3208	4042	3590
ENSG00000011422.12	6	12	13	19	10	8	19	14	20	16	16	33	31	17	30	45	62	45	294	480	262
ENSG00000011426.11	241	140	200	218	138	191	329	255	207	340	235	434	333	223	263	203	267	303	164	202	265
ENSG00000011451.19	1503	1580	1457	1606	1480	1450	1990	1790	1261	2047	1621	2173	2323	1862	2092	2475	2412	2435	1980	2576	2345
ENSG00000011454.17	845	792	912	931	900	946	1267	969	758	1277	852	1405	1142	947	1006	1107	1201	1161	949	1104	1066
ENSG00000011465.17	14	10	6	15	11	12	12	17	8	13	6	28	13	5	15	16	15	2	9	9	7
ENSG00000011478.12	274	307	326	404	315	362	619	367	373	425	286	476	380	301	388	347	434	360	257	338	331
ENSG00000011485.15	1682	1737	1623	1957	1735	1850	2727	2153	1624	2246	1633	2339	2230	1871	1939	2146	2254	2104	1651	2354	2023
ENSG00000011523.14	304	339	340	411	295	324	442	404	271	461	296	486	578	444	550	887	1033	893	967	1377	1137
ENSG00000011566.15	615	611	654	829	614	679	1099	855	692	1023	662	1081	955	756	780	959	1017	967	968	1195	1117
ENSG00000011590.14	0	0	0	0	0	0	0	0	0	0	0	0	0	0	0	0	0	1	0	0	0
ENSG00000011600.11	11	8	3	8	7	7	18	8	5	3	2	7	5	3	13	4	5	6	6	0	2
ENSG00000011638.10	9	3	11	4	13	7	20	14	5	15	5	18	22	11	18	29	19	22	79	105	88
ENSG00000011677.13	0	0	0	0	0	0	0	0	0	0	2	1	0	0	0	0	0	0	0	0	0
ENSG00000012048.22	79	74	63	83	65	71	99	72	49	125	61	97	100	97	82	98	87	101	61	80	83
ENSG00000012061.15	428	439	455	572	447	459	676	584	451	577	406	712	576	421	569	572	641	681	539	944	705
ENSG00000012124.17	12	18	15	16	20	14	21	13	11	18	14	20	13	5	6	7	16	8	5	25	12
ENSG00000012171.20	353	310	265	286	283	262	341	343	238	428	305	415	452	445	416	456	531	422	235	291	297
ENSG00000012174.12	757	702.85	854	1229	832	896.27	1576	982.49	970	1111.43	834.64	1360	1245	962.36	997	1062	1433.9	1172.41	1048	1279	1110
ENSG00000012211.13	250	218	184	212	202	187	272	246	208	277	220	293	300	271	324	440	472	425	388	552	489
ENSG00000012223.13	4	2	2	2	4	0	5	5	1	4	5	9	6	5	4	3	1	1	4	5	3
ENSG00000012232.9	1072	885	1006	1241	1020	1011	1704	1183	1000	1432	1008	1673	1555	1308	1347	1597	1921	1658	1588	2152	1820
ENSG00000012504.15	1322	1350	1541	2001	1583	1762	2498	2066	1577	1893	1334	2253	1610	1144	1450	1077	1122	1292	327	340	419
ENSG00000012660.14	2966	3027	3626	4640	3464	3777	6366	4372	3965	4465	3283	5510	4695	4012	4283	5286	6072	5462	5553	6854	5967
ENSG00000012779.11	14	10	6	7	16	12	11	11	12	14	10	6	13	9	13	6	4	7	12	18	14
ENSG00000012817.15	0	0	0	0	0	0	0	0	0	0	0	0	0	0	0	0	0	0	0	0	0
ENSG00000012822.16	1210	1366	1229	1488	1367	1308	1927	1452	1193	1680	1280	1764	1466	1224	1369	1348	1472	1301	931	1383	1193
ENSG00000012963.15	395	372.62	416	574	421	474	818	572	515	578	409.98	728	518.65	449	513	506.93	515	494	336.95	469.88	420
ENSG00000012983.11	679	673	837	954	768	807	1300	875	709	1209	791	1278	1236	954	1029	1231	1355	1306	1339	1773	1566
ENSG00000013016.16	75	80	74	99	84	70	132	101	52	118	77	112	84	87	117	89	99	117	56	83	76
ENSG00000013275.8	1625	1456	1490	1889	1608	1726	2444	2181	1581	2055	1546	2513	2220	1778	2350	2625	2593	2764	2334	3069	2827
ENSG00000013288.9	2123	2148	2166	2410	2282	2375	3080	2521	1899	2877	2234	3192	2736	2218	2505	2375	2475	2567	1623	2171	1881
ENSG00000013293.6	1	1	0	3	1	4	2	0	1	2	2	0	0	3	0	2	0	2	0	0	1
ENSG00000013297.11	22	18.02	26	25	21.52	29	56	44.64	38	41	24	59	50	33	81	55	59	72	27	29	40
ENSG00000013306.16	2132	2138	2091	2787	2310	2340	3464	3026	2426	2744	2034	3095	2850	2185	2823	3021	3040	3255	2473	3346	2694
ENSG00000013364.19	646	647.9	561	664	656	692	757.58	740.16	514	833.63	610	909	892.94	648	757.31	848	800	860	715.81	1003	887
ENSG00000013374.16	1210	1097	1285	1418	1258	1380	1885	1587	1132	1704	1252	1876	1818	1446	1562	1849	1797	1891	1578	2099	1793
ENSG00000013375.16	2413	2363	2693	3341	2598	2787	4536	3451	2670	3480	2582	4351	3921	2904	3426	3386	3992	3834	2757	3818	3459
ENSG00000013392.8	288	308	301	380	329	320	518	392	302	366	318	467	363	262	304	258	295	324	175	215	187
ENSG00000013441.16	1619	1634	1711	2279	1865	1929	2983	2230	1740	2244	1710	2661	2261	1819	1792	2051	2237	2143	1786	2356	2042
ENSG00000013503.10	547	589	588	659	599	637	863	762	539	731	609	880	847	638	684	660	669	780	535	611	578
ENSG00000013523.10	943.59	960.32	999.93	1358.24	1003.57	1165.53	1900.13	1188.27	1021.67	1451.79	1009.23	1572.08	1502.2	1245.46	1261.92	1379.02	1551.23	1433.45	975.63	1201.38	1278.13
ENSG00000013561.18	1374	1369	1531	2102	1571	1662	2841	1983	1737	2086	1458	2534	2213	1832	2045	2507	2617	2443	2219	2844	2519
ENSG00000013563.14	490	499	528	622	513	512	690	674	511	681	478	725	794	632	775	938	959	886	890	1073	948
ENSG00000013573.17	174.91	186.79	139.2	229.52	187.51	197	285.54	255.22	161.41	318.81	208	262.56	354.48	251.2	253.74	315.45	304.56	322.03	221.76	300.02	279.81
ENSG00000013583.10	2099	1911	2040	2724	2227	2268	3463	2914	2342	2610	2122	3095	2626	1953	2731	2290	2377	2735	1260	1716	1586
ENSG00000013588.8	53	35	59	46	48	40	65	73	56	75	41	82	56	36	54	47	43	61	143	198	122
ENSG00000013619.14	451	584	547	553	518	591	666	571	456	597	388	710	420	376	383	291	335	301	306	399	294
ENSG00000013725.14	0	0	1	0	1	0	0	3	0	5	0	0	4	2	0	0	1	0	0	0	0
ENSG00000013810.19	206	158	155	193	160	174	261	191	146	308	206.16	318.12	293	199	222	225	255	225	201	225	254
ENSG00000014123.10	952	956	1137	1502	1041	1222	2014	1341	1148	1495	1054	1846	1507	1055	1171	1122	1449	1234	764	973	845
ENSG00000014138.9	64.82	59.76	114	84.34	73.2	78.12	165.59	99.44	100.84	135.54	72.47	133.28	91.31	112	162.64	87.62	97.64	101.4	43.27	63	78.65
ENSG00000014164.7	633	666	628	695	693	661	954	734	598	882	642	882	927	806	946	1088	1133	1024	833	1148	934
ENSG00000014216.15	4063	4207	3835	4732	4100	4301	5881	5317	4028	5619	4047	6205	5763	4563	5450	5657	6074	6096	4677	6200	5533
ENSG00000014257.16	6	4	7	13	5	5	12	7	11	2	3	9	7	9	4	4	3	1	1	3	1
ENSG00000014641.19	2754	2618	2926	3732	3019	3436	4521	3963	2995	3293	2389	4182	3175	2303	3258	2715	2845	3227	1655	2272	2175
ENSG00000014824.14	1349	1226	1539	1869	1424	1518	2544	1758	1419	1922	1369	2287	1991	1522	1684	1755	2027	1949	1394	1805	1719
ENSG00000014914.21	149	171	162	188	146	152	251	190	157	266	163	265	252	205	212	313	352	258	218	293	266
ENSG00000014919.12	915.77	967.71	946.96	1312.09	1041.86	1179.64	1640.07	1350.56	1075.96	1365.44	934.23	1429.38	1308.19	993.47	1135.65	1168.84	1302.98	1134.4	853.79	966.11	881.06
ENSG00000015133.19	1089	1046	996	1004	1028	1131	1239	1140	747	1637	1145	1661	1573	1276	1381	1403	1422	1573	999	1152	1290
ENSG00000015153.14	267	276	301	377	295	298	483	398	314	435	264	494	450	301	363	368	452	444	385	492	405
ENSG00000015171.19	1460	1402	1445	1794	1489	1638	2283	1901	1372	2294	1567	2750	2500	2004	2097	2455	2520	2474	2108	2821	2399
ENSG00000015285.10	69	100	66	75	79	97	144	104	71	116	79	100	107	84	86	101	84	91	50	64	55
ENSG00000015413.9	4	12	8	14	7	9	13	12	16	6	7	12	16	12	16	16	12	15	5	14	5
ENSG00000015475.18	282	277	230	310	262	286	411	447	312	416	312	498	515	380	508	769	755	837	797	1003	950
ENSG00000015479.19	3453.23	2721.82	3182.43	4108.89	3598.25	3730.19	4753.1	4429.39	3555.45	5072.31	3411.66	5916.87	5456.47	3796.98	4426.84	4970.61	5640.08	5554.93	4299.57	6136.19	5722.42
ENSG00000015520.14	2015	2184	2309	2777	2256	2354	3524	2658	2274	2890	2227	3060	3149	2561	2954	2995	3320	2970	1955	2367	2332
ENSG00000015532.10	663	599	551	574	614	597	752	705	520	823	646	826	838	777	799	799	757	796	458	615	642
ENSG00000015568.13	223.61	225.94	434.13	386.03	113.3	549.87	387.3	39.63	152.99	444.04	523.98	851.56	285.8	492.84	137.23	332.29	479.8	176.96	366.84	259.1	439.66
ENSG00000015592.16	0	0	0	2	1	1	1	2	1	0	0	1	0	0	0	2	0	0	1	3	3
ENSG00000015676.18	1536	1531	1670	1921	1639	1666	2595	2071	1591	2200	1656	2498	2185	1906	2130	2454	2669	2595	2077	2609	2447
ENSG00000016082.15	2	1	3	2	0	1	3	3	2	1	0	1	4	0	1	2	2	2	0	2	1
ENSG00000016391.11	2117	2312	2095	2588	2300	2371	3361	2568	1964	2927	2171	3127	2701	2092	2576	1816	1938	1955	658	855	822
ENSG00000016402.13	3	8	7	6	1	5	2	4	4	6	1	2	3	2	4	2	3	9	1	1	0
ENSG00000016490.15	9	7	11	9	12	9	8	15	6	4	1	13	11	15	16	8	4	23	9	3	22
ENSG00000016602.9	0	0	0	0	0	0	0	0	0	0	0	0	0	0	0	0	0	0	0	0	0
ENSG00000016864.18	1161	1169	1243	1497	1316	1434	2131	1676	1229	1611	1134	1959	1499	1224	1385	1322	1353	1549	766	955	952
ENSG00000017260.19	1361	1346	1491	1946	1398	1606	2796	1786	1670	2237	1512	2483	2265	1783	1884	2279	2542	2459	2323	3007	2580
ENSG00000017427.16	2	6	2	2	1	7	5	0	1	6	0	1	2	0	1	1	5	0	3	10	15
ENSG00000017483.15	7	5	9	12	6	11	14	10	7	10	5	11	5	6	15	11	18	13	13	13	20
ENSG00000017797.13	2843	2676	2657	3008	2977	2981	3801	3429	2369	4048	2826	4531	4023	3357	3714	3840	3987	4077	3410	4493.99	3869
ENSG00000018189.13	878	839	871	1061	845	861	1346	1057	823	1321	920	1490	1605	1324	1259	1667	1830	1669	1667	2082	1816
ENSG00000018236.15	1	0	4	1	2	3	1	2	3	1	1	0	2	4	1	2	1	0	1	2	3
ENSG00000018280.17	8	11	17	18	14	13	7	17	9	13	5	13	7	6	5	5	5	2	14	7	3
ENSG00000018408.14	139	102	151	170	110	120	216	176	134	222	130	266	179	152	164	134	171	172	156	253	205
ENSG00000018510.16	1072	1049	1232	1560	1214	1330	2021	1567	1419	1851	1291	2231	2221	1782	1787	2415	2759	2478	2450	3118	2993
ENSG00000018607.6	1	0	0	0	0	0	0	0	0	0	0	0	1	0	1	0	1	0	0	0	0
ENSG00000018610.14	235	205	264	327	228	220	402	308	250	343	225	363	354	292	287	344	446	388	285.99	384	340
ENSG00000018625.15	6	3	12	9	5	10	17	20	6	12	13	15	19	31	23	44	23	22	12	14	24
ENSG00000018699.13	280	209	290	301	290	293	416	395	279	388	289	449	450	325	421	431	504	495	416	545	465
ENSG00000018869.16	41	36	60	75	55	59	80	63	44	48	45	70	50	50	53	54	75	64	44	84	66
ENSG00000019102.12	10	9	10	4	5	10	16	13	12	11	9	10	10	13	15	12	17	12	6	8	15
ENSG00000019144.19	808	716	642	765	717	727	1043	766	581	1023	750	1069	996	888	920	924	994	941	942	1191	1153
ENSG00000019169.10	0	1	0	0	0	1	0	0	1	0	0	0	1	0	0	0	0	1	1	1	1
ENSG00000019186.10	0	0	0	2	0	0	0	0	0	0	0	0	1	0	0	0	5	0	0	0	0
ENSG00000019485.13	218	217	235	269	250	248	361	264	218	355	277	353	373	321	307	306	348	371	243	354	305
ENSG00000019505.8	13	4	10	13	10	3	18	7	11	20	13	14	18	15	7	11	18	12	30	25	23
ENSG00000019549.13	519	448	474	659	498	579	874	675	558	730	491	808	621	399	573	449	556	553	885	1298	920
ENSG00000019582.15	787	781	791	949	802	833	1054	1105	760	834	789	1085	834	713	936	828	896	874	541	671	631
ENSG00000019991.18	0	0	0	5	1	1	8	1	1	4	2	0	6	0	2	2	2	2	2	5	0
ENSG00000019995.6	1137.97	1030.09	1229.67	1535.46	1222.87	1290.96	2006.64	1487.89	1198.26	1700.35	1148.63	1855.31	1545.95	1229.63	1374.79	1543.93	1761	1651.09	1449.56	1829.54	1671.23
ENSG00000020129.16	325	282	313	360	297	308	576	329	303	502	324	433	457	364	415	475	511	442	445	624	528
ENSG00000020181.18	9	5	1	7	11	5	4	7	4	15	3	9	10	10	6	17	2	14	8	17	13
ENSG00000020219.9	2	0	0	0	0	0	0	0	0	0	0	0	0	0	0	1	0	1	0	0	0
ENSG00000020256.20	294	288	273	319	258	303	384	390	314	434	281	447	493	382	462	492	519	514	412	556	532
ENSG00000020426.11	213	220	219	359	297	301	413	375	243	320	276	415	358	279	362	427	436	516	397	570	500
ENSG00000020577.13	1388	1263	1247	1413	1267	1278	1877	1521	1137	2153	1498	2369	2199	1905	1840	2083	2270	2199	1708	2322	2011
ENSG00000020633.18	0	0	0	0	0	0	1	0	0	0	0	0	0	0	0	0	0	1	1	3	3
ENSG00000020922.12	329	325	373	446	380	428	643	444	352	525	376	599	567	420	432	536	631	543	607	781	735
ENSG00000021300.14	163	117	136	157	185	138	239	179	158	207	154	248	184	158	158	162	154	200	104	118	118
ENSG00000021355.13	1522	1326	1520	1849	1512	1551	2280	1932	1408	1848	1331	2346	2111	1602	1976	2419	2413	2589	2004	2734	2315
ENSG00000021461.16	352	433	453	486	434	505	625	394	344	484	333	440	235	222	259	112	140	141	43	44	52
ENSG00000021488.13	80	104	107	134	111	147	181	98	99	152	122	147	148	99	138	96	117	124	77	67	57
ENSG00000021574.12	517	431	563	723	485	622	976	709	617	750	528	935	787	699	654	749	943	855	716	912	772
ENSG00000021645.18	540	484	482	609	494	543	879	636	535	724	517	876	613	468	502	484	540	542	299	374	370
ENSG00000021762.20	53	47	26	65	35	42	53	54	49	76	45	54	109	71	76	116	76	88	104	158	131
ENSG00000021776.11	742	793	909	1036	765	909	1431	986	859	1200	859	1366	1227	1024	1082	1158	1277	1148	1010	1233	1122
ENSG00000021826.16	4433	5388	5955	6324	6006	6955	7024	5690	5030	5570	3746	6758	3352	2399	2894	1827	1924	1962	601	610	770
ENSG00000021852.13	785	845	888	1047	1004	1100	1213	1206	848	1114	764	1296	1088	948	1149	1080	1050	1081	713	947	901
ENSG00000022267.19	2	2	6	9	4	1	3	3	6	5	5	5	3	1	9	9	11	5	17	22	17
ENSG00000022277.12	1283	1209	1317	1469	1398	1416	1782.87	1843	1158.49	1661.13	1253	1879	1586.82	1335	1672	1628	1600	1767	1241.46	1761	1621
ENSG00000022355.18	0	0	0	0	0	0	0	0	0	0	0	0	0	0	0	0	0	0	0	5	0
ENSG00000022556.16	0	0	0	0	2	1	0	0	0	0	0	0	0	0	0	0	0	0	0	0	0
ENSG00000022567.9	378	444	437	518	428	441	608	492	421	570	406	676	553	484	525	516	570	555	472	636	536
ENSG00000022840.16	3527	3468	3740	4432	3700	3958	6038	4767	3735	4936	3857	5661	5282	4456	4934	5657	5985	5816	5175	6701	5721
ENSG00000022976.15	228	223	213	231	208	209	275	239	167	333	214	330	320	242	269	254	318	241	142	228	182
ENSG00000023041.11	587	545	619	796	615	705	1040	806	604	820	554	948	874	660	723	902	930	916	800	1089	1014
ENSG00000023171.18	130	117	112	134	172	177	225	132	126	165	115	206	112	117	91	90	109	84	152	199	154
ENSG00000023191.17	2124	1959	1863	2397	2089	1942	3089	2662	2070	2704	1877	2899	2874	2339	3110	3424	3497	3534	3063	3982	3352
ENSG00000023228.14	2298.24	2316	2570	3267	2655.32	2848	4470.56	3091.27	2521	3540.38	2458.9	4235.73	3853.99	3090	2913.8	3104	3657	3345	2566.81	3276	3114.78
ENSG00000023287.13	1815	1667	1973	2291	2003	2081	2863	2227	1698	3173	2092	3487	3649	2891	2892	3669	3938	3786	4471	5973	5203
ENSG00000023318.8	1762	1719	1900	2423	1985	2198	3233	2530	1915	2401	1766	2922	2424	1828	2213	2385	2595	2435	1841	2511	2245
ENSG00000023330.15	5320	5824	5597	6952	6351	6408	8384	7608	5647	7460	5623	8574	8232	6407	8072	8004	7964	8226	4651	5769	5484
ENSG00000023445.14	421	356	443	510	447	416	645	518	414	574	385	730	468	321	398	323	435	441	297	442	413
ENSG00000023516.9	970	976	1188	1366	1078	1088	1886	1213	1093	1698	1122	1865	1653	1362	1268	1434	1896	1546	1278	1718	1526
ENSG00000023572.9	325	330	373	467	365	360	635	501	387	453	327	585	623	464	554	761	795	815	812	1116	953
ENSG00000023608.5	101	64	78	92	87	104	129	101	93	95.6	70	135	142	111	106	125	130	129	116	225	155
ENSG00000023697.13	1156	1173	1268	1784	1321	1374	2304	1792	1507	1620	1238	2076	1795	1299	1678	1840	1823	2004	1292	1747	1538
ENSG00000023734.11	2410	2104	2440	3221	2527	2720	4297	3472	2890	3274	2436	4233	3567	2800	3430	3720	4136	4307	3489	4521	4365
ENSG00000023839.12	2631	2656	2749	3628	2896	3234	5360	3959	3137	5176	3505	5583	8687	7582	7271	11623	12730	11283	11101	13017	13167
ENSG00000023892.11	74	53	62	71	71	54	100	91	64	89	56	55	45	58	57	55	54	67	21	21	27
ENSG00000023902.14	299	200	215	277	202	195	358	332	260	465	329	566	617	464	581	1194	1185	1189	2708	4428	3212
ENSG00000023909.10	1445	1273	1505	2063	1538	1696	3196	2294	1944	2703	1932	3202	4832	4025	4105	7110	8418	7056	10175	12818	10874
ENSG00000024048.10	1123	1240	1244	1509	1299	1452	2032	1501	1234	1818	1299	2098	1878	1577	1571	1759	1933	1705	1476	1987	1769
ENSG00000024422.12	63	86	77	77	76	92	104	86	79	96	84	105	123	103	122	170	173	143	401	658	364
ENSG00000024526.17	31	18	24	51	18	32	73	36	57	53	31	66	45	13	29	38	32	36	18	19	24
ENSG00000024862.17	344	301	351	498	401	392	647	442	394	423	352	519	416	349	392	385	405	441	261	328	330
ENSG00000025039.15	455	357	494	644	453	441	860	629	489	662	478	801	755	629	703	992	1121	1023	1250	1801	1359
ENSG00000025156.13	183	185	214	261	222	207	366	277	210	312	216	365	335	231	273	317	329	343	324	377	368
ENSG00000025293.17	418	361	404	459	438	421	657	474	429	659	446	690	679	470	509	684	736	632	659	871	835
ENSG00000025423.11	102	137	137	180	172	189	182	128	94	131	104	162	93	46	79	69	45	72	20	28	15
ENSG00000025434.19	1174	1291	1228	1534	1322	1288	1857	1610	1233	1445	1184	1647	1392	1162	1440	1349	1327	1431	648	830	815
ENSG00000025708.14	126.04	99.49	104.65	111.72	145.45	132.26	212.39	170.04	119	171.73	113.74	169.46	198.93	174.6	200.8	261.13	241.34	274.76	300.7	492.24	395.97
ENSG00000025770.19	564	566	510	674	579	541	762	749	502	750	591	857	778	583	836	761	777	820	540	864	731
ENSG00000025772.8	1057	947	1089	1303	1066	1145	1574	1411	994	1313	1030	1463	1243	1059	1271	1291	1413	1408	1191	1556	1311
ENSG00000025796.14	2656.54	2617.71	2873.11	3122.83	3044.41	3205.41	4220.82	3370.28	2606.33	4015.14	2706.03	4487.25	3882.41	2913.16	3354.03	3496.62	3649.38	3674.33	3044.62	3861.01	3740.78
ENSG00000025800.14	1701	1703	1814	2173.31	1869	2003	3184	2178	1808.75	2518	1787.27	2926	2477	2042.2	2167	2470.19	2737.67	2520	2156	2745	2542.78
ENSG00000026025.16	9589	5740	6851	7593	6139	5918	10027	9576	7175	11816	7783	14406	13116	10460	12548	19819	21109	21785	32600	47841	38497
ENSG00000026036.22	210.16	246.59	194.54	225.52	190.36	222.49	272.69	179.9	186.27	297.5	261.8	265.91	321.57	258.67	253.46	264.49	306.77	216.48	249.4	217.45	220.93
ENSG00000026103.22	433	333	368	496	346	397	572	524	388	510	369	644	579	387	526	479	520	595	346	451	485
ENSG00000026297.15	1439.11	1546.25	1427.08	1810.31	1605	1630.46	2422.31	2083.3	1620	1676.86	1426.22	1963.15	1897.55	1493.21	1903.88	1895	1853.44	2023.19	1075.48	1369.33	1344.11
ENSG00000026508.18	1076	747	917	1097	851	836	1652	1319	1008	1678	1168	2084	3005	2780	2565	4996	5563	4883	7076	10152	8028
ENSG00000026559.14	10	10	4	8	6	4	4	8	6	3	7	3	6	4	5	18	20	16	54	93	49
ENSG00000026652.15	365	342	319	399	361	389	484	399	306	535	347	528	497	512	435	531	635	530	538	705	663
ENSG00000026751.17	0	2	1	0	1	1	0	0	0	1	1	1	2	0	0	4	3	2	19	41	20
ENSG00000026950.17	442.81	429.95	384.69	542.65	501.8	476.88	710.01	541.88	437.51	541.26	422.45	615.71	461.06	324.42	401.24	251.67	261.29	320.72	109.16	120.62	121.13
ENSG00000027001.10	240	187	251	310	264	254	396	321	252	335	260	366	357	224	345	369	341	402	259	317	325
ENSG00000027075.15	84	74	76	98	74	78	124	82	86	107	67	123	98	66	94	86	81	102	92	103	91
ENSG00000027644.5	0	0	0	0	1	0	0	0	0	0	0	0	0	0	0	0	2	0	0	0	0
ENSG00000027697.14	1589	1487	1742	2352	1849	1978	3148	2359	1974	2341	1727	3018	2692	2031	2388	2637	2931	2936	2621	3566	3103
ENSG00000027847.14	602	557	518	714	598	592	891	730	620	751	510	838	785	618	792	825	825	847	614	887	726
ENSG00000027869.11	3	0	0	0	3	0	1	2	2	3	2	2	11	4	8	16	17	19	24	33	22
ENSG00000028116.17	355	264	323	377	365	398	558	437	321	535	344	578	625	487	532	664	773	749	713	938	820
ENSG00000028137.19	41	79	49	62	71	84	82	80	51	108	71	101	100	68	65	63	76	81	31	52	36
ENSG00000028203.18	1193	1054	1199	1290	1128	1271	1817	1485	1083	1688	1162	1968	1699	1415	1503	1857	2087	1979	1895	2539	2244
ENSG00000028277.21	12	11	12	7	10	8	12	9	5	20	18	21	15	14	22	11	14	13	14	30	19
ENSG00000028310.18	570.37	521.85	511	535.97	523.32	543.54	731.33	640.1	513.13	887.27	666.98	905.41	1021.16	768.14	826.22	980.59	1045.31	976.63	912.98	1164.82	1040.84
ENSG00000028528.15	1694	1671	1796	2115	1845	1925	2675	2055	1695	2302	1524	2567	2103	1681	1823	1792	1938	1905	1302	1788	1693
ENSG00000028839.10	208	155	230	319	216	221	368	294	204	313	222	309	321	262	314	413	393	423	495	657	583
ENSG00000029153.14	145	116	125	144	114	126	231	147	144	209	138	275	298	278	193	284	347	286	428	547	470
ENSG00000029363.17	2236.5	1937.2	2205.02	2692.61	2186.73	2502.9	3664.68	2794.82	2134.1	3408.42	2293.75	4020.87	3413.78	2687.17	2904.02	2966.41	3397.45	3442.08	2906.58	3797.8	3681.26
ENSG00000029364.12	1837	1912	2266	2910	2030	2306	4040	2629	2335	2760	2024	3463	2869	2206	2550	2500	2941	2808	2141	2743	2454
ENSG00000029534.20	68	58	62	63	53	65	65	76	51	98	48	103	70	51	55	48	56	61	47	52	41
ENSG00000029559.7	0	0	0	0	0	0	0	0	0	0	0	0	0	0	0	0	0	0	0	0	0
ENSG00000029639.11	316.03	318.68	342.45	494.22	383.37	389.38	612.26	511.57	373.29	449.56	329.27	619.09	572.2	392.05	471.39	556.15	605.67	624.24	385.6	521.53	480.37
ENSG00000029725.17	1201	1197	1182	1508	1270	1433	1863	1566	1191	1834	1280	2106	1883	1537	1586	1869	1938	1981	1939	2640	2179
ENSG00000029993.15	451	376	405	491	371	418	677	571	414.99	657	439	737	709	649	641	971	1073	937	1030	1447	1290.98
ENSG00000030066.13	1047	972	1118	1588	1014	1160	2125	1303	1263	1524	1112	1815	1610	1302	1284	1548	1803	1698	1230	1695	1487
ENSG00000030110.13	531.65	432.58	466.77	708.92	498.59	496.36	883.67	693.96	515.85	772.71	592.91	819.59	768.72	694.89	768.76	906.88	957.59	1004.84	966.62	1482.33	1171.22
ENSG00000030304.14	0	0	0	0	0	0	0	0	0	0	0	0	0	0	0	0	0	0	0	0	0
ENSG00000030419.16	58	46	63	74	41	52	71	61	51	79	49	102	70	50	58	35	63	69	22	29	28
ENSG00000030582.18	4249	4263	4103	4710	4039	3957	6026	5125	4132	5322	4140	5878	4984	3950	5274	5293	5480	5607	4546	6512	5219
ENSG00000031003.10	653	579	645	824	564	680	994	845	569	970	711	1048	1031	808	837	1014	1160	1000	1140	1552	1284
ENSG00000031081.11	19	31	32	19	21	22	31	26	19	50	18	31	34	29	34	40	38	39	52	99	71
ENSG00000031691.7	71	76	96	105	85	87	138	101	86	129	86	160	100	76	93	83	101	97	60	93	60
ENSG00000031698.13	4290	4023	4196	5088	4380	4558	6324	6021	4273	6297	4580	7187	7212	5606	6727	8767	8923	9286	9591	13004	10894
ENSG00000031823.14	1204	1157	1081	1229	1129	1051	1627	1432	1009	1483	1112	1581	1525	1297	1632	1676	1794	1665	1399	1892	1695
ENSG00000032219.19	510	532	524	619	530	615	846	629	434	866	604	947	678	569	524	476	533	561	319	443	450
ENSG00000032389.12	377	343	340	502	384	388	550	489	341	484	369	521	496	437	528	512	559	577	433	573	465
ENSG00000032444.16	1421.57	1362	1241.37	1380	1327.01	1311.98	1734.1	1657	1182.95	1861.64	1391	2028	1826	1476.41	1662	1794	1786.3	1752.53	1413	1801.02	1628.4
ENSG00000032742.17	295	241	288	333	283	280	414	353	227	355	249	436	395	351	357	422	438	434	327	425	377
ENSG00000033011.12	700.37	650.99	655.99	926.2	682.43	710.85	1216.99	946.74	767.98	910.72	738	1130.19	901.48	785.75	941.89	978.95	1059.98	1080.99	734	944	886.98
ENSG00000033030.14	564	514	529	622	515	573	794	650	464	770	574	950	822	627	724	778	805	784	708	877	820
ENSG00000033050.9	479.03	432.14	403.02	551.38	388.98	444.5	705.43	557.59	442.77	704.05	500.56	734.6	903.99	637.73	708.31	945.1	1008.71	978.98	859.98	1200.7	962.06
ENSG00000033100.16	1222	1282	1326	1564	1348	1304	2327	1767	1388	1946	1397	2213	2038	1678	2055	2176	2440	2280	2298	3240	2865
ENSG00000033122.20	5	7	3	1	6	7	4	4	7	5	7	7	23	8	7	6	9	6	2	2	2
ENSG00000033170.16	152	136	155	172	158	160	223	203	147	233	127	227	216	147	190	230	280	295	272	404	318
ENSG00000033178.13	967	1027	1066	1400	1037	1033	1861	1389	1145	1576	1080	1952	1709	1402	1459	1769	2186	1952	2018	2683	2385
ENSG00000033327.13	424	415	424	422	370	405	527	487	345	674	482	715	745	702	706	1070	1147	992	1548	2352	1741
ENSG00000033627.16	2838	2953	3053	3814	3081	3253	5279	3664	3102	4238	3031	4854	4691	3816	4312	4928	5323	4861	4323	5483	4786
ENSG00000033800.13	751	738	897	1116	805	802	1310	869	844	1079	713	1231	1002	782	861	911	1028	873	725	962	811
ENSG00000033867.16	293	249	278	381	263	245	536	349	338	519	312	592	655	569	502	913	1119	944	1384	1768	1534
ENSG00000034053.14	148	158	138	175	118	147	196	178	144	251	184	253	301	261	225	390	392	378	377	517	428
ENSG00000034152.19	1270	1127	1250	1468	1315	1307	2043	1619	1325	1825	1462	1879	2014	1522	1919	1897	2032	2034	1598	2266	1914
ENSG00000034239.11	2	3	6	7	14	5	7	9	15	16	5	9	12	4	13	4	9	8	6	6	6
ENSG00000034510.6	16599	13565	14622	19605	15041	15664	23876	21931	18319	17387	13290	21406	19407	14862	20728	24380	24931	29973	19715	29159	26666
ENSG00000034533.11	165	121	154	205	192	215	250	209	151	202	161	265	214	160	168	188	174	180	83	162	138
ENSG00000034677.13	1249	1060	1169	1398	1255	1281	1988	1528	1151	1789	1176	2177	1948	1597	1645	2117	2325	2211	2339	2983	2701
ENSG00000034693.15	346	296	363	461.94	400	341	650.98	453	427	464.98	353.98	559.95	471	341.99	472.99	466.96	503	556	322	449	381.99
ENSG00000034713.8	1098	1020	1164	1472	1196	1290	2142	1574	1382	1428	1023	1891	1406	1189	1381	1464	1659	1831	1575	2168	1975
ENSG00000034971.17	0	0	0	0	0	0	0	0	0	0	0	0	0	0	0	0	0	0	0	0	0
ENSG00000035115.22	1356	1282	1246	1684	1293	1397	2338	1665	1331	1870	1326	2213	1897	1561	1672	1823	2018	1837	1590	1919	1824
ENSG00000035141.8	1299.98	1301	1401.99	1677	1438	1498	2186.99	1808.96	1431.98	1807	1300	2256	2035.99	1607	1834.94	1899.96	2049.99	2135.99	1460	1905.98	1795.99
ENSG00000035403.17	4429	3632	4046	4803	3803	4052	6306	5361	4235	6643	4609	7737	7740	6010	6577	8385	9158	8775	9632	13049	11371
ENSG00000035499.13	50	25	24	54	25	43	78	55	44	61	33	76	52	44	59	55	58	73	49	67	59
ENSG00000035664.11	232	154	167	205	155	132	244	184	153	269	163	302	228	191	183	228	306	239	231	320	315
ENSG00000035681.9	428	393	424	514	436	480	718	543	398	624	496	693	652	541	580	636	720	697	655	865	698
ENSG00000035687.10	631	519	642	764	569	608	1054	841	712	945	631	989	967	785	823	1063	1187	1157	1214	1662	1301
ENSG00000035720.8	0	0	0	0	0	0	0	0	0	0	0	0	0	0	0	0	0	0	0	0	0
ENSG00000035862.12	1492	1477	1663	1769	1486	1469	2385	2048	1561	2342	1609	2428	2342.95	1844	1972	3189.6	3668	3139	5947	9107	6520
ENSG00000035928.16	1493	1518	1605	1737	1678	1885	2182	1821	1374	2280	1600	2630	2158	1542	1797	1716	1728	1867	1592	2115	1947
ENSG00000036054.13	574	601	660	830	659	704	1174	799	720	951	667	1154	930	741	814	888	967	900	807	1107	977
ENSG00000036257.13	1259	1157	1281	1570	1408	1346	2085	1638	1283	1906	1364	2266	2003	1528	1757	2039	2049	2044	1778	2355	2167
ENSG00000036448.10	30	32	26	30	18	23	41	20	14	36	24	57	36	34	32	25	18	14	4	21	19
ENSG00000036473.8	878	1074	1107	1393	1277	1392	1873	1629	1115	1272	971	1778	1150	859	1094	759	734	888	283	224	321
ENSG00000036530.9	56	60	73	76	84	70	89	95	43	93	63	85	63	43	50	42	35	51	18	14	27
ENSG00000036549.13	851	761	867	1122	941	960	1378	1036	927	1212	806	1482	1329	974	1054	1216	1352	1344	1093	1412	1279
ENSG00000036565.15	1	0	0	2	0	2	1	0	0	0	0	0	2	0	1	0	4	1	0	0	0
ENSG00000036672.16	151	95	144	169	139	139	187	176	120	184	131	199	182	159	167	212	200	198	186	218	201
ENSG00000036828.16	0	1	7	2	3	2	4	3	0	2	0	8	17	7	6	5	11	9	0	2	2
ENSG00000037042.9	327.83	330	339.5	433.77	340.26	337.96	558.97	394.34	322.2	511.86	336.11	449.85	471.37	350.54	451.34	427.34	430.01	418.1	220.24	307.86	305.1
ENSG00000037241.7	493.3	449.89	414.33	613.47	469.34	524.39	822.62	671.15	535.23	501.6	419.39	650.44	575.14	411.41	593.7	545.31	589.63	642.14	353.91	489.28	433.69
ENSG00000037280.16	6	4	3	0	2	5	5	6	1	2	1	4	5	4	4	5	2	7	13	24	10
ENSG00000037474.15	1036	1034	977	1175	1005	1094	1508	1356	962	1576	1084	1699	1818	1386	1498	1978	2077	2031	2040	2639	2492
ENSG00000037637.11	612	558	650	791	577	618	1028	807	618	912	671	1061	942	845	881	1181	1273	1156	1271	1636	1383
ENSG00000037749.12	374	333	436	539	359	422	668	430	441	504	390	722	592	510	418	519	644	568	538	715	645
ENSG00000037757.14	529	575	560	688	592	544	1018	638	598	743	560	878	866	707	743	792	874	746	554	771	679
ENSG00000037897.17	125	127	111	153	154	154	222	135	131	179	125	190	240	212	257	332	333	364	327	427	389
ENSG00000037965.6	0	0	0	0	0	0	0	0	0	0	0	0	0	0	0	0	0	0	0	0	0
ENSG00000038002.9	563	555	605	766	598	614	858	807	557	755	528	906	748	603	703	832	795	803	592	856	780
ENSG00000038210.14	905	869	966	1284	997	1213	1913	1268	1066	1444	1041	1708	1505	1185	1288	1430	1586	1473	1171	1445	1367
ENSG00000038219.13	756	779	751	759	782	835	947	755	565	1264	819	1277	1210	1047	934	1127	1160	1186	1151	1614	1478
ENSG00000038274.17	1002	984	1162	1389	1162	1178	1805	1520	1079	1520	1099	1838	1615	1163	1400	1535	1680	1750	1215	1491	1365
ENSG00000038295.8	1	5	3	6	8	5	10	4	0	4	5	5	7	2	3	11	7	5	0	4	8
ENSG00000038358.15	1421.54	1495.18	1410.8	1661.56	1418.75	1500.59	2150.82	1861.01	1488.61	2000.82	1479.48	2251.09	1970.11	1698.61	1978.24	2138.44	2219.48	2176.42	1616.66	2255.78	1938.11
ENSG00000038382.20	2298	1937	1928	2253	1963	2103	2906	2239	1809	3634	2362	3642	3755	3169	3141	4154	4636	4225	5210	7256	6293
ENSG00000038427.16	1913	1107	1441	1585	1030	1213	2202	1669	1470	3030	1735	3343	2492	1985	2116	3249	3780	3885	5275	7121	7372
ENSG00000038532.16	699	672	670	714	673	671	1005	792	627	1043	717	1081	962	835	883	972	965	961	980	1259	1119
ENSG00000038945.15	27	28	21	44	24	31	57	44	38	33	39	48	56	37	38	23	32	21	16	16	10
ENSG00000039068.19	4651	4995	5553	6805	5336	5842	9218	6752	5580	7412	5434	8602	7862	6948	7340	8003	9122	8039	6421	8042	7422
ENSG00000039123.16	944	948	1038	1278	1061	1142	1781	1303	1005	1447	992	1658	1446	1109	1218	1299	1414	1494	1106	1327	1327
ENSG00000039139.9	145	125	139	123	118	159	174	161	128	258	166	254	327	275	202	264	315	318	250	292	270
ENSG00000039319.17	922	908	1065	1378	987	1120	1835	1225	1004	1506	1029	1855	1505	1246	1212	1239	1553	1439	1115	1469	1384
ENSG00000039523.20	1495	1390	1316	1462	1264	1311	1832	1616	1261	2176	1540	2288	2350	1894	2199	3027	3157	2958	4553	6472	4765
ENSG00000039537.13	3038	3414	3489	4188	3911	4221	4954	4711	3425	4253	3080	5275	4019	3127	4031	3333	3337	3399	1868	2226	2167
ENSG00000039560.14	984	982	1031	1111	969	1024	1326	1253	856	1399	962	1609	1361	1179	1101	1397	1420	1462	1893	2855	2294
ENSG00000039600.11	2	1	1	0	0	0	0	0	0	4	1	0	1	0	2	0	2	1	0	1	0
ENSG00000039650.12	419	369	313	407	362	361	529	443	350	527	350	559	519	407	497	586	677	588	703	1026	871
ENSG00000039987.6	1	0	0	0	0	0	0	0	0	0	0	0	0	0	0	0	1	0	0	3	0
ENSG00000040199.18	276	244	283	307	281	275	571	340	285	481	307	536	498	461	424	611	736	645	816	1050	818
ENSG00000040275.17	203	178	182	201	180	210	271	215	179	278	190	297	326	221	237	313	298	322	208	312	309
ENSG00000040341.18	777	762.45	894	1069	889	975.79	1423.44	1198.87	883.14	1156.02	940.33	1488.8	1259	1046	1121.78	1117.02	1218.53	1270	854	930.09	903
ENSG00000040487.13	462	509	437	535	425	459	756	622	475	624	510	715	824	631	742	1085	1030	1050	1483	2097	1559
ENSG00000040531.14	547	433	574	636	525	450	883	706	588	731	617	902	923	782	921	1136	1171	1200	1325	1988	1492
ENSG00000040608.14	166	186	167	195	144	166	271	247	206	232	199	250	244	219	282	342	389	348	323	525	386
ENSG00000040633.13	1026	886	870	1143	974	1045	1448	1405	972	1367	1069	1559	1527	1280	1583	1942	1934	2000	1928	2570	2290
ENSG00000040731.10	367	270	294	384	304	309	502	408	351	380	311	573	361	233	334	233	260	333	62	71	93
ENSG00000040933.15	430	347	399	465	372	398	630	496	428	617	409	694	611	518	532	684	750	710	683	919	766
ENSG00000041353.10	28	20	54	58	23	28	84	41	45	50	37	57	46	41	32	32	53	55	104	138	107
ENSG00000041357.16	2101	2081	2171	2904	2374	2474	3765	3194	2483	2813	2110	3520	3034	2297	2795	3161	3350	3663	2481	3208	3199
ENSG00000041515.16	60	60	60	75	48	73	106	85	60	98	81	96	78	65	72	63	72	69	29	70	45
ENSG00000041802.11	663	546	614	637	602	637	932	758	504	885	697	998	1034	822	993	1229	1117	1196	1005	1369	1198
ENSG00000041880.14	81	81	96	96	97	99	121	97	95	121	88	124	130	87	136	112	113	133	78	95	91
ENSG00000041982.16	103	88	75	125	118	121	151	119	99	198	115	219	160	101	156	132	131	136	224	329	281
ENSG00000041988.15	219	213	227	262	217	240	337	290	194	281	230	293	329	242	316	251	304	362	208	262	253
ENSG00000042062.13	43	36	34	47	46	47	35	36	44	47	47	52	39	36	41	21	15	31	1	7	8
ENSG00000042088.14	297	238	286	337	294	270	457	419	350	409	302	508	490	371	441	529	608	546	514	612	541
ENSG00000042286.15	1259	1156	1197	1560	1339	1321	2070	1645	1258	1804	1336	2021	2348	1872	2176	2741	2863	2697	2455	3530	3054
ENSG00000042304.11	0	0	0	0	0	0	0	0	0	0	0	0	0	0	0	0	0	0	0	0	0
ENSG00000042317.17	216	205	202	264	198	217	300	245	220	314	220	305	258	207	250	237	233	298	146	175	190
ENSG00000042429.12	539.15	495.53	611.56	763.98	623.27	716.37	1167.07	802.74	657.19	1068.9	537.01	1115.98	1077.18	1063.36	964.79	1216.13	1361.65	1268.42	1309.59	1826.97	1675.18
ENSG00000042445.14	2051	1992	2245	2651	2461	2543	3480	3057	1905	2880	2114	3230	3275	2757	3403	3624	3456	3720	2307	2897	3035
ENSG00000042493.16	621	587	546	760	640	625	919	831	646	728	622	890	895	651	1002	1063	1103	1133	919	1197	1086
ENSG00000042753.11	1263	1170	1220	1622	1254	1413	2070	1842	1434	1392	1133	1711	1382	1151	1486	1568	1597	1648	1088	1590	1462
ENSG00000042781.13	73	76	90	109	72	104	132	74	99	85	47	128	86	83	65	46	61	55	18	22	39
ENSG00000042813.8	0	0	0	0	0	0	0	0	0	0	0	0	0	0	0	0	0	0	0	0	0
ENSG00000042832.12	15	18	17	26	12	19	35	21	10	29	20	21	20	13	21	20	14	21	14	22	16
ENSG00000042980.13	25	10	17	13	16	16	23	20	12	22	13	25	19	12	19	18	14	27	13	11	22
ENSG00000043039.7	0	1	3	0	0	0	3	0	0	0	0	1	1	0	0	2	0	0	0	0	1
ENSG00000043093.15	1056	1048	1179	1572	1136	1199	2109	1436	1282	1632	1111	2002	1687	1241	1347	1466	1724	1609	1309	1625	1504
ENSG00000043143.20	257	254	244	258	232	272	392	295	237	393	226	384	296	220	265	223	323	313	187	288	257
ENSG00000043355.12	0	0	0	0	0	0	0	2	0	1	0	1	0	1	0	0	5	0	2	6	5
ENSG00000043462.12	0	0	0	0	1	0	0	0	0	0	0	1	1	0	0	0	3	0	0	0	1
ENSG00000043514.17	254	230	235	302	228	267	367	344	268	343	222	389	409	270	332	356	410	410	253	308	354
ENSG00000043591.6	0	0	1	0	0	1	3	0	0	1	0	1	5	4	0	4	1	0	2	4	2
ENSG00000044012.4	4	8	10	8	6	3	14	3	3	7	3	9	1	5	2	2	4	5	0	4	3
ENSG00000044090.8	1538	1486	1420	1692	1417	1553	2225	1765	1441	2109	1630	2157	1916	1575	1845	1652	1760	1747	1243	1624	1432
ENSG00000044115.21	8357	8279	8419	9558	8756	9080	11997	10773	7789	13039	9040	13946	14273	11624	12873	15612	16239	16060	15358	20178	17522
ENSG00000044446.12	2022	2082	2076	2489	2016	2161	3443	2521	1911	3055	2060	3082	3136	2403	2570	2501	2672	2746	1520	1928	1832
ENSG00000044459.15	327	319	401	430	380	443	517	441	310	463	327	600	460	376	381	348	376	343	244	323	304
ENSG00000044524.11	2	1	0	0	2	2	0	0	0	1	4	2	2	0	0	0	1	1	5	4	2
ENSG00000044574.8	19619	18028	19300	23243	20259	20775	27919	24503	17959	25724.9	18587	29519	19183	14493	17717	16033	16294	17500.9	13620	18611.9	16664
ENSG00000046604.13	1939	1768	1911	2294	1771	2081	3154	2403	1940	2907	2133	3504	3403	2800	2773	3964	4716	4203	5412	7379	5917
ENSG00000046647.13	441	355	400	493	410	406	576	510	424	532	402	638	545	413	575	635	649	703	495	660	623
ENSG00000046651.15	804	674	678	843	733	805	1047	835	619	1198	737	1255	1310	1022	1034	1428	1473	1329	1175	1690	1563
ENSG00000046653.15	7	7	6	12	3	3	15	13	9	9	9	7	13	3	9	6	22	21	19	22	16
ENSG00000046774.10	0	0	0	0	1	0	0	0	0	0	0	0	0	0	0	0	0	0	0	0	0
ENSG00000046889.19	8	16	10	10	8	11	20	16	7	16	7	25	10	9	10	17	15	24	17	28	21
ENSG00000047056.16	649	610	679	838	647	694	1118	765	639	925	705	1036	886	701	765	717	789	740	634	844	803
ENSG00000047188.16	1038	898	1138	1516	1136	1250	2037	1335	1156	1582	1094	1862	1599	1439	1327	1478	1717	1473	1035	1225	1209
ENSG00000047230.15	1646	1487	1830	2170	1839	1894	2876	2168	1827	2351	1723	2715	2521	1937	2117	2355	2542	2450	1663	2216	2194
ENSG00000047249.18	721	625	745	1082	789	797	1389	1035	814	993	702	1296	1115	853	967	1081	1171	1303	1022	1414	1327
ENSG00000047315.16	2162	1959	2169	2914	2202	2525	3619	2907	2266	3181	2263	3795	3431	2770	3053	3533	3827	3601	3677	4838	4180
ENSG00000047346.12	693	734	718	930	747	832	1181	779	655	960	730	1143	892	623	695	670	756	693	627	698	703
ENSG00000047365.12	269	274	248	313	275	315	462	321	312	492	315	489	495	373	382	477	578	505	604	871	717
ENSG00000047410.14	2044	2062	2081	2182	2269	2414	2745	2308	1616	3303	2226	3472	3190	2628	2633	3128	2968	3134	2649	3404	3285
ENSG00000047457.14	3927.42	3878.48	3964.47	4909.51	4395.56	4815.05	5988.1	5437.02	3752.34	5520.18	3895.93	6877.1	5355.31	4203.55	5059.34	4524.27	4682.99	4810.05	3496.52	4475.97	4336.01
ENSG00000047578.13	447	445	432	476	451	430	596	495	379	702	451	649	621	565	579	634	615	599	550	769	644
ENSG00000047579.19	160	120	146	197	154	168	177	211	128	218	170	232	262	200	242	295	274	285	293	424	391
ENSG00000047597.7	17	13	24	25	16	19	42	23	18	20	29	40	29	34	25	39	61	34	36	42	28
ENSG00000047617.15	24	10	13	11	24	21	37	25	29	23	24	38	26	14	22	33	21	17	17	21	16
ENSG00000047621.12	371	284	347	508	366	388	689	492	398	484	370	636	486	399	410	477	532	490	400	453	432
ENSG00000047634.15	1046	1091	1149	1531	1214	1323.93	2145.82	1454	1249	1636	996	1880	1527	1088	1208	1139	1245	1150	940	1054	1044
ENSG00000047644.18	815	677	783	801	717	778	1111	842	737	1264	814	1400	1313	1140	1143	1416	1587	1417	1548	2087	1724
ENSG00000047648.23	5	4	3	5	8	3	14	10	4	11	1	14	7	10	16	25	10	19	16	11	5
ENSG00000047662.5	1	6	3	5	2	4	4	7	1	4	4	0	3	4	1	4	4	4	0	6	2
ENSG00000047849.21	6583	6562	6307	6460	6755	7268	8265	7459	5316	9920	7049	10313	10924	8936	9471	11454	11509	11833	10729	13687	12498
ENSG00000047932.14	1131	1089	1265	1649	1270	1347	2325	1586	1354	1738	1312	2165	1825	1371	1440	1547	1766	1611	1258	1677	1537
ENSG00000047936.10	44	47	44	51	50	50	39	37	38	50	41	61	39	25	23	21	22	17	8	10	9
ENSG00000048028.11	517	465	491	674	557	607	881	648	497	794	561	831	776	602	648	718	862	736	572	658	644
ENSG00000048052.21	177	147	159	146	125	161	223	187	179	294	178	375	456	281	320	708	932	833	1503	2029	1611
ENSG00000048140.18	961	878	930	1170	962	1013	1594	1165	922	1340	1053	1416	1394	1214	1404	1551	1710	1543	1465	1919	1604
ENSG00000048162.20	300	284	275	362	307	295	423	436	290	431	294	454	572	460	547	802	758	811	824	1085	1069
ENSG00000048342.16	204	189	245	212	197	276	321	306	204	293	215	334	313	236	256	273	251	350	209	206	210
ENSG00000048392.11	1606	1526	1826	2433	1684	1967	3393	2341	2122	2424	1768	3375	2454	1811	2004	2148	2623	2619	1869	2374	2311
ENSG00000048405.10	340	307	349	479	316	378	616	445	373	568	375	666	604	496	441	589	727	555	662	955	784
ENSG00000048462.11	0	0	0	0	0	0	0	0	0	0	0	0	0	0	0	0	0	0	0	0	0
ENSG00000048471.14	246	251	232	304	235	299	343	264	213	366	294	345	368	306	313	374	354	335	243	379	338
ENSG00000048540.15	1	0	2	1	0	2	0	2	3	0	0	2	0	1	2	3	3	2	1	0	0
ENSG00000048544.6	943.7	927	965	1190	985	1074	1770	1415	1129	1193.99	931	1634.88	1336.94	1066	1188	1409	1388.88	1543.83	1138	1520	1466
ENSG00000048545.14	7	3	7	10	3	7	4	5	4	3	0	5	6	3	9	7	0	0	25.2	26	24.76
ENSG00000048649.13	703.17	638.8	657.02	765.02	729.6	813.18	1055.85	803.66	627	1093.42	717	1196	1093.68	896.52	791.96	999.43	1034.27	1046.75	1183	1393.79	1267
ENSG00000048707.15	1419	1287	1389	1604	1391	1553	2151	1595	1296	2352	1587	2657	2690	2326	2192	2859	3187	3081	2659	3330	3389
ENSG00000048740.18	207	181	176	265	189	199	406	221	228	324	227	399	394	306	305	443	561	429	637	927	717
ENSG00000048828.17	3255	3471.1	3701	4383	3603	3843	5685.75	4330.71	3359.56	5008.25	3622	5704	5412	4530.55	4739	5222	5757.68	5287	3802.76	4777.63	4496.75
ENSG00000048991.16	792	807	872	872	854	947	1225	969	785	1159	852	1384	1252	988	1089	1106	1135	1150	853	1002	1048
ENSG00000049089.15	29	25	35	25	29	30	37	32	30	31	24	48	27	32	37	45	42	27	40	35	46
ENSG00000049130.16	231	268	303	377	285	323	582	390	347	403	314	506	400	286	346	277	304	373	316	359	346
ENSG00000049167.14	164.3	136	152	230	149	171.65	288.74	241	174	210	141	263.06	260	187.14	206.04	207	201	254.62	181.64	232	222
ENSG00000049192.15	114	105	104	132	100	123	219	144	120	165	129	186	135	110	101	81	103	107	33	21	35
ENSG00000049239.12	4328	4718	4744	5772	4414	4892	7655	5276	4716	6573	4497	7306	6417	5285	5268	5184	6059	5448	3240	4293	4092
ENSG00000049245.13	1400	1334	1576	2005	1497	1629	2767	2005	1715	2043	1436	2466	2128	1672	1863	2054	2342	2264	1879	2477	2222
ENSG00000049246.14	79	110	118	143	121	116	189	157	107	156	108	150	139	99	99	111	125	112	72	79	75
ENSG00000049247.13	1	3	3	9	4	1	2	9	3	2	6	5	2	7	4	6	5	4	0	2	1
ENSG00000049249.8	260	223	243	261	165	178	336	266	257	387	250	511	479	355	405	494	610	562	652	844	762
ENSG00000049283.18	0	0	0	1	0	0	0	0	0	0	0	1	0	0	0	1	1	1	0	1	0
ENSG00000049323.16	257	194	211	212	219	216	369	281	189	375	239	428	410	338	352	488	553	530	841	1232	1015
ENSG00000049449.9	3143.41	2574.91	2941.81	3745.06	2856.79	2938.89	5128.68	3958.37	3207.63	4829.8	3314.49	5469.36	5800.83	4366.49	4847.31	6589.1	7262.28	7430.11	7722.17	10339.4	9556.18
ENSG00000049540.17	0	2	1	2	1	0	0	1	1	1	4	0	1	0	1	1	1	2	2	0	0
ENSG00000049541.11	298	314	298	380	323	364	464	413	319	429	277	482	434	342	392	440	431	442	334	456	412
ENSG00000049618.23	1209	1075	1065	1106	1059	1133	1522	1185	928	1689	1235	1712	1802	1504	1480	1586	1757	1722	1402	1845	1632
ENSG00000049656.14	1990	1906	1963	2519	2026	1985	3346	2606	2055	2804	1980	3208	2784	2172	2587	2906	2945	3004	2381	3271	2800
ENSG00000049759.18	2899	2618	2957	3611	2844	3042	4557	3525	2882	4333	3006	5109	4751	3694	3980	4922	5581	5023	5630	7417	6394
ENSG00000049768.15	5	4	7	8	4.66	7	6	2	2	3	4	1	4	4	2	3	0.78	4	4	1	4
ENSG00000049769.14	182	150	173	225	165	166	278	208	173	201	164	215	210	143	210	208	201	180	105	168	165
ENSG00000049860.14	1910	1766	1877	2443	1984	2176	3089	2533	1890	2504	1791	3094	2746	2171	2515	3249	3492	3428	3835	5263	4308
ENSG00000049883.15	208	279	265	342	279	316	469	336	250	393	282	432	346	290	298	283	319	313	132	164	221
ENSG00000050030.15	11	6	22	20	13	11	25	17	10	15	20	21	13	14	17	18	24	24	15	13	12
ENSG00000050130.18	666	652	697	903	676	774	1356	938	855	977	720	1158	1079	820	919	1083	1187	1304	924	1091	1036
ENSG00000050165.18	223	146	224	200	187	169	217	184	156	214	144	268	177	151	185	211	248	216	250	339	300
ENSG00000050327.15	1088.03	945.75	976.19	1044.02	1050.38	1065.94	1467.54	1296.93	920.14	1854.68	1169.34	1746.54	1983.85	1790.5	1731.6	2507.32	2637.09	2514.68	4126.03	5845.07	4712.98
ENSG00000050344.9	265	163	255	251	206	240	409	325	281	374	258	432	424	318	360	409	497	520	345	450	490
ENSG00000050393.11	487	431	468	627	449	484	942	618	516	677	484	790	702	668	678	788	893	866	792	1093	924
ENSG00000050405.13	1517	1377	1540	1761	1491	1769	2170	2007	1393	2440	1594	2746	2570	1907	2176	2616	2622	2838	4082	5747	4539
ENSG00000050426.16	797	816	871	1126	847	957	1457	999	914	1164	793	1300	1017	776	912	902	1029	1019	584	800	739
ENSG00000050438.17	3	2	3	4	2	8	2	5	4	3	1	3	3	3	3	6	4	8	6	7	6
ENSG00000050555.18	0	0	0	0	0	0	7	0	0	2	1	2	2	0	5	1	1	2	1	3	5
ENSG00000050628.20	1	2	3	5	2	0	5	0	2	1	3	4	3	1	4	2	1	5	9	8	5
ENSG00000050730.16	0	0	0	4	0	1	0	1	0	1	0	1	3	2	2	3	1	2	8	13	11
ENSG00000050748.17	1041	904	1088	1423	1096	1092	1920	1362	1022	1530	1048	1867	1603	1245	1385	1461	1630	1635	1247	1601	1408
ENSG00000050767.17	6	4	3	2	6	8	4	0	14	4	0	5	3	2	3	6	3	3	4	9	7
ENSG00000050820.17	2508.35	2167.43	1942	2196.05	2057	2012	3032.36	2774	2068	3528	2520.3	3583	3962	3383	4015	5603.65	5392	5377	6962	9868.21	7869.52
ENSG00000051009.10	860	931	945	1255	974	944	1535	1194	1029	1325	922	1328	1249	1038	1153	1201	1254	1182	856	1084	957
ENSG00000051108.15	3588	3501	3896	4998	4058	3964	6428	5073	3936	4595	3528	5685	4176	3301	4008	3826	4343	4293	3451	4675	4090
ENSG00000051128.19	283	174.71	218	245	199	185	293	258	183.7	344	242	362	475	342.83	426	694	740.75	749	1048.43	1603	1228.58
ENSG00000051180.17	30	25	30	40	24	30	47	39	38	52	34	59	39	36	46	49	48	45	22	31	37
ENSG00000051341.14	42	20	34	42	23	45	46	37	35	78	30	67	47	28	53	39	37	59	28	20	31
ENSG00000051382.8	849	771	872	1064	898	949	1449	992	878	1274	908	1488	1333	1077	1111	1284	1373	1283	1021	1280	1301
ENSG00000051523.11	2426	2131	1946	2833	2158	2111	3523	3273	2444	2272	2070	2897	2632	2022	2985	2914	2787	3310	2116	3111	2703
ENSG00000051596.9	527.56	513.47	528.75	705.34	549.9	513.12	862.92	762.22	586.89	693.04	493.37	810.47	688.75	680.26	672.46	796.55	798.6	897.53	625.23	823.71	626.82
ENSG00000051620.11	1419	1276	1315	1713	1393	1371	2173	1914	1408	1645	1338	2123	1858	1506	1785	2027	2094	2180	1619	2387	2108
ENSG00000051825.15	364.71	362	465	502	442.97	459	682.44	462	397.86	601	426	660.12	544.25	472.61	419.67	388	432.6	464	237	328	310
ENSG00000052126.14	978	1041	976	1173	1022	1163	1437	1130	851	1426	988	1622	1473	1201	1232	1209	1278	1362	898	1188	1086
ENSG00000052344.16	1378	1399	1436	1746	1396	1443	2209	1923	1494	1734	1487	2144	2062	1733	2047	2547	2689	2480	2622	3416	2723
ENSG00000052723.11	914	872	969	1338	1065	1081	1839	1208	1125	1392	962	1647	1343	1041	1186	1255	1405	1335	980	1295	1202
ENSG00000052749.13	472	429	436	476	476	432	657	519	408	763	481	795	877	696	819	1231	1263	1291	1606	2096	1861
ENSG00000052795.13	1016	969	1082	1394	1052	1164	1785	1166	1098	1592	992	1767	1343	1209	1150	1292	1665	1439	1348	1852	1590
ENSG00000052802.13	18473	21783	25233	32913	25899	28490	46592	31674	26971	26650	20199	34921	25002	19681	23234	22079	24359	23695	14732	18161	17220
ENSG00000052841.15	1587	1535	1526	1902	1688	1759	2585	1903	1553	2458	1649	2632	2751	2201	2300	3094	3267	2890	3233	4120	3668
ENSG00000052850.8	0	0	0	0	0	0	1	0	0	0	0	0	1	0	0	0	0	1	0	3	2
ENSG00000053108.17	5	5	6	14	3	5	13	13	6	4	4	11	6	7	5	7	3	5	6	14	11
ENSG00000053254.15	1574	1800	1938	2344	1827	2025	3255	2158	1855	2683	1917	3069	2410	1952	1969	2122	2548	2254	1593	1922	1828
ENSG00000053328.8	17	7	14	18	12	10	30	16	20	14	11	25	9	17	23	14	12	18	18	10	18
ENSG00000053371.12	896	836	822	1000.93	904	898	1279	1194	839.97	1010	820	1250	1027	779.95	1154.98	1042	1050.95	1115.96	659	878.96	785
ENSG00000053372.5	436	358	355	448	356	427	636	562	409	602	427	743	819	649	778	967	999	1017	965	1339	1082
ENSG00000053438.11	0	0	0	0	0	0	0	0	0	0	0	1	0	0	1	0	0	0	0	0	0
ENSG00000053501.13	259	250	192	299	262	237	319	330	260	284	223	332	337	265	296	365	336	402	242	400	324
ENSG00000053524.12	14	15	3	5	18	9	19	17	13	17	12	18	21	20	18	39	16	19	38	43	35
ENSG00000053702.15	0	0	0	0	0	2	0	0	0	1	0	0	2	0	0	0	0	1	0	0	0
ENSG00000053747.16	1089	922	918	995	889	1005	1237	1028	797	1695	1070	1560	1941	1772	1503	2612	2680	2328	2370	2846	2935
ENSG00000053770.12	764	636	802	1116	778	886	1431	1022	917	1121	760	1411	1131	887	990	1043	1137	1124	902	1093	963
ENSG00000053900.10	876	854	905	1184	991	1003	1651	1173	897	1257	826	1485	1221	933	1011	967	1074	1020	605	705	839
ENSG00000053918.17	122	107	151	127	120	110	155	162	73	132	118	130	135	104	128	111	136	109	67	90	66
ENSG00000054116.12	1321	1188	1213	1590	1250	1479	2155	1686	1255	1579	1268	2008	1866	1446	1763	1927	1967	2163	1600	2315	2042
ENSG00000054118.15	2874	2769	2744	3421	2949	3131	4566	3486	2757	4306	3040	4693	4210	3419	3426	3714	3833	3965	2954	3961	3769
ENSG00000054148.17	1600.98	1533	1459	1992	1577	1490	2129.97	2044	1557	1749	1381.98	2008.98	1722	1315	1680	1625	1562	1958	1024	1363.94	1352
ENSG00000054179.12	17	47	40	27	50	36	54	54	38	40	47	36	43	38	42	26	43	41	12	10	20
ENSG00000054219.11	12	14	25	30	20	15	39	21	13.85	33	26	42	31	24	35	27.84	41	36	53	83	49
ENSG00000054267.22	563	595.37	632.59	684.5	617	692.43	933	676.51	518	1059.15	680	1117.84	1041.29	709	770.44	881.89	1029	932.95	911.85	1075.4	1047.39
ENSG00000054277.14	2218.88	1706.91	2008.78	2643.84	1949.13	2098.12	3510.79	2682.66	2176.64	2838.61	2046.52	3510.01	2998.85	2186.09	2710.07	3220.39	3651.1	3668.04	3141.36	4219.46	3668.97
ENSG00000054282.16	273	228	227	299	274	290	383	318	217	418	236	465	375	359	339	412	441	429	339	448	404
ENSG00000054356.14	14	5	8	7	14	6	9	6	9	12	10	19	5	9	14	18	20	12	53	122	50
ENSG00000054392.13	239	193	215	281	219	170	375	239	227	281	234	354	313	256	302	336	378	299	307	433	356
ENSG00000054523.17	1591	1611	1687	1856.5	1710	1862.36	2644	1992	1570.42	2759	1846.19	3100	3030	2693	2438	3065	3480.77	3100.6	2800	3674.81	3364.22
ENSG00000054598.9	1	4	1	1	2	0	4	3	0	2	2	8	4	2	5	7	12	7	17	36	21
ENSG00000054611.14	607	614	666	737	703	677	967	872	672	862	659	1086	958	765	992	1052	1016	1022	680	886	870
ENSG00000054654.16	1006	1168	1063	1166	1161	1205	1412	1156	880	1450	982	1652	1330	1117	1053	879	942	970	623	726	779
ENSG00000054690.14	997	991	944	1249	1007	1051	1626	1109	1012	1640	1065	1764	1693	1461	1392	1725	1875	1672	1365	1719	1660
ENSG00000054793.14	1756	1820	2003	2535	1872	1998	3146	2127	1962	2653	1939	3148	2693	2220	2343	2576	3012	2603	2430	3227	2760
ENSG00000054796.13	0	0	0	0	0	0	0	0	0	0	0	0	0	0	0	0	0	0	0	0	0
ENSG00000054803.4	0	0	0	0	0	0	0	0	0	0	0	0	0	0	0	0	0	0	0	0	0
ENSG00000054938.15	3	1	3	2	1	0	5	6	2	1	6	2	5	0	0	6	5	3	7	6	9
ENSG00000054965.10	1093	1159	1078	1329	1161	1193	1779	1219	1054	1551	1113	1702	1367	1092	1177	1116	1169	1202	685	820	901
ENSG00000054967.13	40	29	40	38	26	26	37	48	30	64	30	49	84	68	59	152	140	155	340	487	356
ENSG00000054983.17	931	859	1041	1351	899	1051	1725	1148	1079	1281	936	1634	1237	892	1092	1022	1088	1101	745	974	968
ENSG00000055044.11	502	433	490	595	505	564	740	691	485	682	538	870	894	654	767	975	1014	1019	1052	1310	1262
ENSG00000055070.17	2954	2766	2958	3602	3104	3136	4896	3971	3124	4042	2913	4631	4017	3081	3952	4040	4423	4534	3553	5003	4344
ENSG00000055118.15	8	6	7	7	7	5	8	8	9	8	10	12	8	18	19	33	20	15	45	98	59
ENSG00000055130.17	1264	1146	1239	1395	1192	1447	1945	1616	1248	1803	1312	2297	2116	1658	1865	2123	2244	2257	1941	2537	2323
ENSG00000055147.19	456	496	530	702	526	628	878	665	475	746	487	903	705	605	626	664	720	675	523	608	571
ENSG00000055163.20	1187	1328	1333	1590	1455	1456	1997	1541	1164	1744	1293	1982	1716	1456	1561	1542	1784	1698	1255	1653	1492
ENSG00000055208.19	1075	1071	1152	1471	1215	1285	1934	1449	1246	1705	1219	2025	1677	1360	1543	1601	1924	1716	1727	2216	1991
ENSG00000055211.14	851	893	901	1072	876	931	1351	1131	862	1134	877	1450	1110	853	1089	1080	1242	1185	902	1147	1170
ENSG00000055332.18	1283	1269	1454	1831	1381	1642	2647	1561	1502	2125	1430	2505	2298	1908	1774	2010	2285	2075	1568	1997	1912
ENSG00000055483.19	727	674	662	784	685	688	987	823	642	1181	807	1122	1341	1140	1194	1531	1648	1521	2118	3118	2347
ENSG00000055609.18	1422	1386.97	1538	1808	1470	1646	2423	1628	1456	2368	1653	2446	2247	1963	1741	2038	2318	2153	1868.98	2378	2165
ENSG00000055732.13	2	4	2	5	3	13	8	6	6	2	4	3	6	3	2	16	6	9	13	26	15
ENSG00000055813.6	2	0	2	6	1	0	4	3	6	0	0	9	0	6	3.65	11	6	8	16	32	6.34
ENSG00000055917.15	1951	1756	2085	2733	1884	2061	3548	2443	2134	2950	1919	3581	2901	2258	2383	2868	3255	2921	2670	3562	3046
ENSG00000055950.16	996	959	969	1276	996	1089	1523	1391	1029	1215	913	1460	1269	886	1321	1352	1216	1498	840	1057	1029
ENSG00000055955.17	6185.08	7042.67	6553.7	8583.86	7335.87	7932.95	10418.8	9228.98	6633.77	8695.45	6494.12	9544.15	8516.84	6848.67	8632.37	8404.49	8395.72	8168.29	6101.12	8200.91	7110.33
ENSG00000055957.11	22032	25495	24010	29725	26013	26601	34701	31110	22324	25816	19905	30164	19260	15042	20135	15061	14786	16204	8089	10289	9606
ENSG00000056050.7	291	252	284	379	319	336	481	425	322	389	278	481	447	333	436	410	373	442	239	379	291.99
ENSG00000056097.16	2043	1945	2150	2626	2064	2212	3413	2590	2107	3206	2172	3585	3071	2252	2644	2826	3344	3066	2795	3795	3320
ENSG00000056277.16	155	180	189	235	198	212	366	201	239	287	198	305	329	273	307	377	440	365	331	460	391
ENSG00000056291.17	16	11	17	13	9	9	23	10	13	23	11	21	17	12	18	20	20	40	70	132	89
ENSG00000056487.16	2	9	4	3	3	3	6	3	4	4	3	3	2	4	4	2	8	2	8	16	6
ENSG00000056558.11	151	184	152	181	135	172	241	168	122	222	155	264	192	158	170	196	170	166	192	295	184
ENSG00000056586.16	1818	1564	1940	2501	1812	1988	3413	2327	1964	2793	1926	3304	2774	2190	2241	2623	3037	2834	2598	3365	2924
ENSG00000056736.10	371	322	384	491	391	408	636	536	394	452	340	557	385	274	353	263	308	303	109	173	140
ENSG00000056972.20	404	362	386	482	380	424	551	466	371	423	381	552	575	431	506	443	557	499	277	441	381
ENSG00000056998.20	1705	1688	1744	2243	1809	1978	3135	2303	1829	2407	1774	2891	2341	1837	2226	1783	1817	1973	749	920	913
ENSG00000057019.16	862	793	941	1175	810	902	1611	1073	961	1358	845	1579	1370	1092	1155	1492	1758	1481	2052	2861	2244
ENSG00000057149.16	0	2	0	1	0	0	0	0	0	0	0	0	0	0	0	0	0	0	0	0	1
ENSG00000057252.13	593	517	589	802	575	701	1189	780	657	817	547	995	727	586	665	655	766	756	618	846	825
ENSG00000057294.14	1635.99	1532.94	1721.9	2040.94	1562.55	1811.97	2662.81	1970.89	1744.85	2198.91	1595.91	2483.89	2141.85	1621.95	1754.89	1970.97	2081.89	2000.9	1455.93	1828.96	1662.92
ENSG00000057468.7	8	0	2	1	4	3	8	5	2	4	2	7	5	8	4	6	6	4	1	12	9
ENSG00000057593.13	1224	1436	1433	1500	1533	1482	1832	1648	1244	1785	1337	1795	1723	1339	1586	1344	1277	1364	645	753	745
ENSG00000057608.17	6580.68	6367.46	7194.91	9157.97	7385.15	8057.57	11493.7	9628.38	7384.65	9180.2	6991.46	11372	9837.37	7516.67	8917.61	9549.36	10258	10658.5	7662.04	10370.1	9174
ENSG00000057657.17	6	3	1	6	2	3	3	1	0	2	5	8	7	7	10	0	5	3	4	5	0
ENSG00000057663.16	618	568	677	874	659	712	1022	824	661	858	632	1047	942	716	853	1010	1072	1100	868	1181	987
ENSG00000057704.13	19	17	20	20	12	22	35	19	30	39	32	23	20	28	25	40	34	42	46	99	57
ENSG00000057757.10	785	772	753	1090	847	814	1398	1093	841	1024	782	1289	1181	946	1146	1225	1329	1346	1001	1493	1347
ENSG00000057935.13	801	763	826	1068	856	964	1392	1052	788	1091	758	1251	1058	818	1048	936	1049	1015	691	811	801
ENSG00000058056.9	264	232	295	351	283	262	530	302	270	442	319	501	413	361	388	404	472	430	254	316	302
ENSG00000058063.16	1200	1164	1333	1563	1232	1455	2320	1498	1298	1786	1307	2193	1830	1530	1483	1683	2031	1780	1714	2234	1912
ENSG00000058085.15	144	121	103	98	110	96	139	160	122	257	127	266	202	185	185	227	214	241	601	904	622
ENSG00000058091.17	358	366	345.12	462	348	330.29	654	455	390	480	330	579	486	394	430	475	603	544	508	577	548
ENSG00000058262.10	6327	6230	6667	8877	6596	6901	11840	8651	7414	8906	6809	10481	8733	6936	8534	9247	10511	9986	9053	12477	10658
ENSG00000058272.19	964	908	954	1040	938	1060	1470	1136	920	1539	982	1612	1503	1116	1273	1413	1599	1497	1540	1956	1701
ENSG00000058335.15	1	3	5	0	0	1	3	5	2	5	1	1	5	3	3	3	8	2	10	15	8
ENSG00000058404.20	8	12	6	15	8	5	10	15	7	7	15	9	8	7	12	26	14	12	14	15	19
ENSG00000058453.17	441.86	428.98	369.04	408.89	380.05	376	542.57	414	322.07	604.48	440.4	510.85	605.49	540.22	527.56	615.92	521.61	589.11	374.17	517.65	442.23
ENSG00000058600.16	776	693	669	812	772	768	1115	958	711	1083	832	1192	1306	1057	1214	1412	1475	1555	1379	1838	1659
ENSG00000058668.14	1922	2023	2254	2555	2055	2332	3331	2443	2156	3045	2024	3550	3288	2719	2739	3401	3886	3411	3323	4344	3782
ENSG00000058673.16	2670.66	2302.15	2306.05	2880.71	2737.94	2936.14	4057.2	3201.73	2179.77	3970.1	2743	4299.72	3975.18	2759.2	3068.38	3537.83	3569.33	4201.95	3656.86	4765.04	4347.84
ENSG00000058729.11	555	480	521	647	596	677	851	814	495	805	509	878	831	676	736	796	887	843	745	963	912
ENSG00000058799.15	763	776	826	1125	857	892	1327	1119	881	1004	817	1241	1095	838	974	1011	1088	1235	784	918	863
ENSG00000058804.12	349	269	330	439	319	350	587	441	375	489	329	636	522	411	470	539	553	605	411	532	516
ENSG00000058866.15	21	11	4	15	10	10	25	9	9	19	18	28	34	17	28	67	87	76	176	275	212
ENSG00000059122.16	670	725	654	710	723	642	952	790	607	1043	706	993	1072	949	1094	1301	1384	1317	1232	1740	1450
ENSG00000059145.18	371	373	357	412	391	412	705	476	418	642	464	624	1076	909	925	1449	1753	1456	1636	2069	1855
ENSG00000059377.17	39	49	25	52	32	32	48	49	29	44	36	52	60	50	45	41	52	55	27	40	40
ENSG00000059378.12	471	421	442	535	444	441	719	564	554	681	460	818	704	563	632	680	717	721	400	520	525
ENSG00000059573.9	2329	2391	2531	3118	2549	2714	3874	3124	2504	3177	2300	3849	3093	2334	2767	2680	3012	3077	2008	2426	2421
ENSG00000059588.10	657	587	695	792	675	757	1244	748	597	989	716	1022	1066	825	868	781	926	786	449	573	540
ENSG00000059691.12	432	441	461	544	469	550	722	679	495	592	423	662	612	470	567	611	651	677	474	610	532
ENSG00000059728.11	449	504	593	687	507	592	1023	652	565	743	561	862	637	558	590	740	895	732	1569	2304	1662
ENSG00000059758.8	356	344	388	527	375	414	677	560	409	568	413	729	586	484	540	585	647	660	617	856	693
ENSG00000059769.20	450.73	388.28	515.14	615.95	520.37	551.89	842.23	606.38	495.12	634.53	502.68	741.06	624.32	525.1	582.29	560.34	632.37	603.84	428.54	598.87	511.07
ENSG00000059804.16	70.17	71	86.8	87.39	72.3	69.6	150.11	86.95	62.48	101.6	59.39	113.97	105.39	50.11	95.39	74.69	104.65	96.86	31.87	19.84	29.51
ENSG00000059915.17	24	36	30	28	40	34	65	32	28	39	31	43	29	29	36	30	22	28	20	21	16
ENSG00000060069.16	622	605	576	639	626	614	816	784	561	884	676	943	997	809	919	1050	1049	1070	982	1322	1107
ENSG00000060138.13	2014	1884	1882	2329	1961	1977	2974	2533	1998	2848	2110	3281	3280	2642	3030.99	4248	4270	4162.99	4627	6903.99	5445
ENSG00000060140.9	4	5	3	2	2	6	14	0	1	1	1	4	4	8	0	8	5	3	4	2	3
ENSG00000060237.17	6635	6880	7336	8494	7296	7803	11588	8463	7207	11149	7707	12219	11390	9569	9414	10076	11335	10736	8116	10679	9917
ENSG00000060303.5	0	0	0	0	0	0	0	0	0	0	0	0	0	0	0	0	0	0	0	3	0
ENSG00000060339.14	1353	1310	1300	1450	1430	1520	1940	1641	1169	2112	1384	2405	2435	1999	1943	2582	2585	2588	2379	3040	2981
ENSG00000060491.16	1732	1870	1531	1751	1809	1843	2340	2066	1512	2443	1819	2486	2553	2064	2331	2347	2168	2335	1809	2470	2326
ENSG00000060558.4	0	0	0	1	1	1	0	1	0	0	0	0	0	1	0	0	0	1	0	0	0
ENSG00000060566.14	1456	1526	1444	1625	1661	1611	2210	2048	1419	2259	1744	2344	2999	2502	2800	3268	3199	3358	1577	1773	1974
ENSG00000060642.10	359	332	390	540	428	465	603	513	402	449	366	560	439	339	459	412	481	416	290	361	312
ENSG00000060656.20	1906	2063	1894	2130	1926	1992	2766	2382	1809	2724	1984	2756	2870	2422	2565	2717	2663	2682	1644	2198	1850
ENSG00000060688.13	433	497	438	579	469	450	771	601	458	565	442	679	588	444	589	622	663	703	402	637	612
ENSG00000060709.15	0	0	1	1	0	0	0	0	0	1	0	0	0	1	3	1	0	0	0	0	2
ENSG00000060718.22	7	6	5	3	5	3	10	5	6	10	10	5	13	9	5	4	4	1	4	3	6
ENSG00000060749.15	949	925	1039	1300	1011	1124	1870	1184	1090	1577	1023	1850	1782	1518	1443	1916	2405	2013	2283	2839	2656
ENSG00000060762.19	933	831	951	1202	1018	1099	1625	1364	1070	1258	897	1614	1334	885	1266	1217	1252	1480	807	1042	987
ENSG00000060971.18	8045	8988	8917	11273	9945	10086	13427	12311	8597	11757	9028	12454	11319	9140	11457	9476	9500	10100	4416	5717	5531
ENSG00000060982.15	2220	2186	2747	3478	2515	2853	4734	3247	2905	3917	2839	4751	4579	3661	3708	4220	5004	4495	3661	4531	4155
ENSG00000061273.18	1397	1114	1130	1300	1123	1040	1760	1378	1140	2144	1430	2213	2369	1949	2073	2669	2994	2686	2449	3120	3012
ENSG00000061337.15	10	9	7	9	2	4	16	6	8	8	18	12	19	26	18	22	24	22	8	13	11
ENSG00000061455.11	15	35	24	26	25	30	42	31	25	44	24	50	27	37	23	28	18	30	13	31	18
ENSG00000061492.12	0	2	0	1	0	0	0	0	0	0	0	3	0	0	0	0	1	2	0	1	0
ENSG00000061656.10	57	57	38	54	53	51	65	58	72	51	42	76	56	54	51	67	57	57	66	85	52
ENSG00000061676.15	3352	3186	3696	4650	3564	3928	6405	4484	3808	5197	3687	6447	5615	4724	4848	5718	6577	6141	5842	7541	6507
ENSG00000061794.13	1479	1420	1490	1866	1506	1685	2406	2293	1543	2039	1519	2563	2324	1839	2145	2363	2456	2728	2014	2648	2323
ENSG00000061918.13	12	7	16	10	3	6	15	11	8	16	7	9	9	16	10	12	16	18	10	20	18
ENSG00000061936.9	930	810	848	865	885	809	1153	1020	689	1309	923	1271	1238	1034	1099	1182	1224	1236	1044	1400	1200
ENSG00000061938.19	660	733	637	637	703	731	1004	694	555	1054	805	1070	1084	937	959	1011	1006	959	717	956	841
ENSG00000061987.16	1206	1281	1448	1904	1379	1583	2610	1548	1496	2005	1302	2219	1760	1457	1532	1498	1683	1555	1236	1578	1442
ENSG00000062038.14	8	13	21	14	18	16	32	13	8	13	3	16	16	7	9	25	17	14	10	14	18
ENSG00000062096.15	0	0	1	0	0	0	0	0	0	0	0	0	0	0	0	0	0	0	0	0	0
ENSG00000062194.16	1385	1360	1573	1837	1583	1719	2468	1949	1470	2239	1562	2663	2365	1798	1961	2418	2752	2612	2765	3781	3098
ENSG00000062282.15	2559	3123	3175	3879	3382	3555	5278	4024	3004	3280	2769	3907	2529	1957	2567	1482	1612	1843	646	906	787
ENSG00000062370.16	115	116	146	152	135	149	210	153	124	201	149	246	201	138	161	161	193	202	151	168	172
ENSG00000062485.19	2714.2	2663.3	2769.54	3663.41	2824.42	2781.29	4686.89	3540.38	2999.01	3667.42	2702.46	4418.46	3772.57	2973.27	3608.57	4038.79	4344.97	4362.68	3227.6	4262.29	3947.73
ENSG00000062524.16	2	4	2	6	5	6	10	12	4	12	4	5	8	14	8	11	16	7	62	93	45
ENSG00000062582.14	1071.77	935.68	1080.49	1460.01	1160	1207	1920	1586.09	1151.8	1164.76	1015.76	1469.96	1233	1006.2	1394	1268.91	1331.92	1627.8	790.63	1162.98	1119.84
ENSG00000062598.18	664	620	680	738	681	729	1086	887	668	1051	728	1159	1030	862	948	1060	1176	1075	917	1166	1101
ENSG00000062650.19	1147	1083	1183	1397	1189	1284	1895	1430	1087	1878	1311	2146	2000	1626	1576	2087	2139	2093	2073	2718	2574
ENSG00000062716.13	3475	2945	3382	4259	3401	3469	6264	4556	3766	4876	3650	5920	6194	5052	5017	6406	6906	6608	5699	7872	6896
ENSG00000062725.10	850	740	884	1139	873	881	1604	1062	975	1180	865	1439	1241	975	1021	1162	1386	1274	1102	1427	1324
ENSG00000062822.14	275	251	235	298	249	254	370	330	260	436	298	393	426	333	435	462	418	405	344	512	402
ENSG00000063015.20	0	0	0	0	0	0	1	0	0	1	0	3	0	0	1	1	1	0	0	0	0
ENSG00000063046.17	6399.98	6102.82	6384.22	8331.16	6502.72	6859.39	10730.8	8540.47	6841.47	8827.22	6565.93	10751.5	8981.38	7159.25	8206.97	8925.31	9633.13	10002	7600.06	10432.5	9628.17
ENSG00000063127.16	57	44	53	65	54	52	103	56	36	103	43	86	67	49	58	48	80	69	51	67	52
ENSG00000063169.10	514	522	427	492	463	483	675	517	413	697	486	758	736	641	616	803	877	730	647	790	684
ENSG00000063176.16	1372	1505	1303	1608	1437	1439	2378	1853	1511	2125	1641	2245	2301	1778	2374	2255	2249	2284	1162	1332	1439
ENSG00000063177.13	5895	5323	5204	7657	5697	5738	8337	7847	6006	6440	4981	7829	6796	5039	7115	7881	8210	9560	6435	9546	8120
ENSG00000063180.9	7	8	6	9	2	11	9	10	5	11	7	6	11	6	10	12	8	7	3	10	14
ENSG00000063241.8	1374	1350	1232	1652	1402	1452	1955	1866	1414	1418	1150	1644	1313	973	1355	1162	1190	1296	641	816	753
ENSG00000063244.12	2261	2045	1925	2373	2241	2057	3229	2678	2095	3080	2183	3366	3232	2659	3117	3625	3576	3585	3203	4397	3868
ENSG00000063245.14	2888	2987	2776	3127	3130	2999	4311	3984	2886	3976	3160	4425	4365	3505	4370	4389	4378	4498	3226	4569	3867
ENSG00000063322.15	950	957	936	1152	931	974	1424	1247	903	1281	953	1441	1263	1021	1122	1126	1228	1232	776	1029	887
ENSG00000063438.17	5.43	1.18	6.51	2.12	3.05	2.92	10.11	2.78	5.16	4.52	5.55	3.81	3.99	1.4	3.87	5.45	2.64	3.74	2.28	7.57	4.15
ENSG00000063515.2	0	0	0	0	0	0	0	0	0	0	0	0	0	0	0	0	0	0	0	0	0
ENSG00000063587.14	440	479	478	579	441	474	762	571	488	649	533	790	702	520	658	654	728	618	554	627	605
ENSG00000063601.17	658	655	709	843	682	713	1184	883	812	1003	678	1301	998	819	888	980	1145	1042	881	1291	1096
ENSG00000063660.9	1079	1030	933	1077	1067	983	1432	1259	1037	1559	1162	1465	1575	1311	1549	1981	2090	1942	2181	3377	2501
ENSG00000063761.16	181	168	172	234	192	223	326	245	180	261	178	334	348	220	259	290	320	268	230	329	273
ENSG00000063854.13	1135	1237	1090	1467	1343	1339	1804	1599	1236	1431	1131	1708	1293	1056	1385	1171	1103	1314	825	1130	972
ENSG00000063978.16	983	816.72	1011.46	1283	975	964	1728	1289	1070	1439	1071	1702	1618	1201	1473	1894	1994	1899.35	1939	2626	2182
ENSG00000064012.21	504	477	559	700	513	559	978	741	580	774	543	909	868	649	834	901	1033	992	785	959	847
ENSG00000064042.18	41	30	19	43	30	42	49	31	27	62	36	53	73	44	51	81	60	63	107	179	119
ENSG00000064102.15	263	251	267	332	257	298	424	382	260	388	271	478	393	307	360	366	397	444	314	396	387
ENSG00000064115.11	1752	1713	1831	2239	1775	2007	3037	2250	1888	2288	1663	2839	2358	1717	2161	1975	2217	2270	1315	1564	1556
ENSG00000064195.7	2	2	0	0	0	2	5	1	0	1	3	0	0	1	0	3	0	1	6	3	5
ENSG00000064199.6	31	46	43	36	35	40	50	38	30	40	28	70	33	35	51	55	42	54	27	30	20
ENSG00000064201.15	0	0	0	0	0	0	0	0	0	0	2	0	1	0	1	0	0	0	0	0	3
ENSG00000064205.10	0	0	1	0	1	0	0	0	0	2	0	0	0	0	0	0	0	0	0	0	0
ENSG00000064218.5	0	0	0	0	0	0	0	2	0	0	0	0	0	0	0	0	0	0	0	1	0
ENSG00000064225.12	63	61	83	82	67	67	138	82	58	116	73	149	155	107	136	168	183	214	164	212	242
ENSG00000064270.12	9	2	3	5	9	8	4	10	4	14	3	4	11	9	9	20	15	15	24	49	49
ENSG00000064300.9	1	7	0	1	0	0	7	1	3	2	1	3	2	2	1	2	3	3	6	12	2
ENSG00000064309.14	271	256	285	397	245	319	491	366	275	447	348	525	407	375	358	411	473	444	280	306	316
ENSG00000064313.12	573	539	682	755	605	609	1083	796	645	913	668	1036	1033	781	781	948	1079	960	922	1261	1209
ENSG00000064393.16	2591	2660	2775	3206	2525	2900	4341	2936	2670	4369	2875	4749	4563	3705	3597	4121	4726	4421	4101	5417	5193
ENSG00000064419.13	1008	990	978	1247	1027	1043	1684	1289	1025	1483	1074	1773	1733	1391	1428	1845	2061	1910	1711	2313	2088
ENSG00000064489.23	113.43	69.46	48.48	76.28	129.95	75.28	151.67	91.03	2.46	107.66	65.82	112.3	86.11	120.01	137.03	167.86	12.82	240.58	104.6	109.71	139.9
ENSG00000064490.14	332	284	322	353	296	302	510	429	321	388	330	456	409	312	428	469	478	554	379	557	483
ENSG00000064545.15	806	779	773	1021	792	776	1297	1108	835	969	748	1082	1017	832	1061	1126	1141	1176	758	982	882
ENSG00000064547.14	381	341	322	422	334	343	548	445	399	528	404	622	770	627	757	1044	1141	1059	833	1119	1027
ENSG00000064601.18	12849	13237	13174	15839	14083	14667	20413	18121	13317	16942	13067	19765	17346	13654	16918	17418	18110	18760	13491	18112	15421
ENSG00000064607.17	1916	1952	1861	2066	1951	2084	3077	1941	1633	3035	1900	3001	2747	2395	2387	2767	2883	2750	2191	2779	2613
ENSG00000064651.14	663	492	602	822	514	646	1060	744	728	980	740	1342	950	730	840	951	1221	1228	868	1150	1138
ENSG00000064652.11	367	367	436	594	453	402	747	589	450	550	413	698	664	477	551	619	712	641	576	715	683
ENSG00000064655.19	0	0	0	0	0	1	0	0	0	0	1	0	0	3	0	0	0	0	0	0	0
ENSG00000064666.15	4170	3423	3769	4060	3519	3526	5215	4916	3747	5419	3956	6182	5924	4467	5811	6759	7163	7245	6670	9242	8194
ENSG00000064687.12	505	556	533	582	469	494	769	617	458	783	589	817	629	539	632	553	558	620	349	479	527
ENSG00000064692.19	149	104	120	111	92	104	156	125	98	184	93	219	203	119	127	139	175	158	175	205	182
ENSG00000064703.12	412	395	410	548	457	438	657	593	458	662	447	749	724	576	570	724	861	786	685	815	699
ENSG00000064726.10	1066	1174	1192	1397	1119	1271	1958	1531	1197	1667	1168	2066	1813	1357	1535	1787	1915	1863	1655	2121	1892
ENSG00000064763.11	6	3	3	3	0	4	6	6	10	8	4	6	8	4	2	9	7	13	10	24	14
ENSG00000064787.13	420	404	389	429	402	471	546	407	334	539	369	586	539	483	497	538	443	481	247	268	306
ENSG00000064835.11	0	0	0	0	0	0	0	0	0	0	0	0	0	0	0	0	0	0	0	0	0
ENSG00000064886.14	2	4	2	4	2	7	4	9	10	10	2	19	7	4	10	6	6	13	7	1	3
ENSG00000064932.16	868	805	768	954	801	824	1233	1040	826	1295	918	1338	1426	1130	1246	1457	1509	1515	1474	2106	1768
ENSG00000064933.17	293	255	261	343	303	354	449	346	287	424	294	460	436	328	402	439	537	467	341	446	399
ENSG00000064961.19	1285	1253	1170	1375	1330	1225	1881	1666	1127	1717	1230	1769	1646	1330	1538	1516	1551	1584	1010	1358	1263
ENSG00000064989.13	6	11	10	20	3	12	16	2	4	9	6	4	3	1	4	1	6	4	2	3	1
ENSG00000064995.18	525	538	594	747	637	644	991	787	613	734	606	850	806	646	684	767	781	837	695	860	759
ENSG00000064999.15	566	516	557	565	544	599	853	689	566	903	606	908	889	772	762	904	979	886	790	988	917
ENSG00000065000.18	3675	3782	3451	4061	3695	3765	5100	4456	3390	5451	4028	5520	5447	4623	4980	5618	5755	5874	5168	7041	6261
ENSG00000065029.15	877	917	855	974	888	895	1138	982	748	1232	862	1111	1159	963	1084	1226	1278	1281	883	1225	1081
ENSG00000065054.14	970	1103	1026	1203	1016	1133	1540	1322	983	1373	997	1380	1334	1006	1390	1150	1073	1252	562	753	693
ENSG00000065057.9	254	308	227	315	216	288	392	394	276	381	247	365	381	235	374	353	301	363	131	179	199
ENSG00000065060.17	1097	1047	1162	1448	1113	1202	1884	1295	1154	1861	1319	2025	2189	1701	1602	2006	2292	2225	1770	2319	2133
ENSG00000065135.11	2202	2004	2402	2766	2228	2463	3592	3006	2385	3184	2198	3974.96	3409	2840	2975	3581	3891	3599	3647	4827	4244
ENSG00000065150.21	2032	1961	2259	2984	2214	2418	3737	2783	2252	3260	2250	3878	3386	2784	3115	3681	4019	3914	3650	4671	4185
ENSG00000065154.11	686	847	951	1271	954	1018	1730	1052	720	998	790	1347	881	664	875	1067	1130	1050	1255	1852	1527
ENSG00000065183.16	537	508	537	655	576	591	953	771	596	855	607	1026	1044	850	831	944	1060	1094	862	1154	1067
ENSG00000065243.20	1118	1070	1230	1594	1247	1342	2279	1492	1370	1769	1232	2059	1808	1497	1403	1739	1912	1796	1587	2070	1802
ENSG00000065268.10	703	654	589	845	665	661	1135	979	721	865	695	949	994	773	1064	1059	1122	1090	694	989	800
ENSG00000065308.5	1750	1929	2097	2650	1913	2254	3754	2317	2253	2627	1953	3224	2706	2304	2490	2509	2919	2516	2067	2587	2311
ENSG00000065320.9	63	92	51	78	72	69	95	67	54	123	85	125	117	127	158	167	228	184	233	369	254
ENSG00000065325.13	56	48	68	86	44	58	99	70	78	101	61	91	86	40	58	40	53	68	52	52	64
ENSG00000065328.16	9	12	14	18	13	18	25	14	10	24	8	24	32	10	15	26	22	25	15	19	26
ENSG00000065357.20	67	64	72	77	71	63	99	68	63	99	69	86	95	65	73	108	113	120	70	116	140
ENSG00000065361.15	3523	3766	3731	4396	3962	4311	5444	4092	3266	5106	3528	5378	4460	3385	3706	3148	3278	3352	1345	1712	1877
ENSG00000065371.17	0	0	0	0	0	0	0	0	0	0	0	0	1	0	0	0	0	0	0	0	0
ENSG00000065413.20	56	49	67	72	68	73	102	98	53	107	53	127	93	92	73	74	110	110	117	147	136
ENSG00000065427.14	2178	2025	2124	2489	2190	2296	3094	2824	2076	2731	2082	3237	3080	2507	2956	3527	3522	3959	2925	4137	3585
ENSG00000065457.10	197	174	183	196	156	171	278	211	169	245	187	292	277	223	260	262	285	260	189	232	242
ENSG00000065485.20	2408	2368	2399	3114	2619	2763	3387	3139	2295	2842	2095	3508	2532	1875	2496	1994.24	2073	2383	1429	1843	1834
ENSG00000065491.8	271	249	269	317	257	263	513	318	309	395	247	450	422	305	342	449	482	449	405	532	518
ENSG00000065518.8	1835.92	1623.99	1679.62	2449.85	1857.6	2014	3080.54	2650.91	2050	1896.89	1558.71	2689.9	2229.89	1733.97	2199.94	2313.99	2421.98	2710.96	1643.96	2360.67	2280.99
ENSG00000065526.11	1079	1116	1004	1045	1029	1119	1426	1088	810	1902	1152	1752	1870	1616	1435	1932	1965	1958	2179	2770	2563
ENSG00000065534.18	2176	2407	2395	2671	2450	2909	3438	2695	2071	3240	2330	3558	3130	2560	2608	2378	2485	2449	1256	1478	1656
ENSG00000065548.18	1135	997	1031	1320	1104	1244	1626	1468	1037	1590	1094	1848	1887	1419	1678	1982	1988	2085	1933	2643	2475
ENSG00000065559.15	1180	1117	1224.95	1523	1154.98	1316	1948.97	1439.98	1176	1586	1119.98	2093.98	1705.99	1368	1541.99	1686	2005.99	1889	1907	2407.97	2131.99
ENSG00000065600.12	85	84	99	127	79	93	152	125	90	133	121	156	156	134	126	193	211	247	240	341	305
ENSG00000065609.14	7	2	6	3	2	3	0	3	1	7	1	6	2	0	1	1	7	0	8	7	7
ENSG00000065613.15	1422	1333	1382	1464	1476	1581	2006	1690	1247	2314	1555	2522	2611	2180	2082	2926	2929	2885	4434	6341	4896
ENSG00000065615.14	150	167	162	204	144	170	323	211	212	265	189	334	257	215	241	327	301	271	368	509	438
ENSG00000065618.21	8	9	14	12	9	4	23	8	8	9	11	16	14	8	12	7	10	14	11	27	16
ENSG00000065621.15	40	27	32	39	31	29	56	26	28	36	29	36	42	21	37	30	34	48	17	31	23
ENSG00000065665.21	235	247	256	353	282	286	538	341	298	368	238	451	343	305	379	415	423	391	289	443	354
ENSG00000065675.15	26	27	45	21	28	35	32	27	23	34	32	53	53	57	39	42	46	52	38	47	32
ENSG00000065717.15	134	157	116	160	127	158	199	192	155	172	130	173	136	118	169	139	148	126	64	85	60
ENSG00000065802.12	641	651	642	818	654	623	1097	777	677	924	667	1085	966	840	971	1000	1111	907	915	1269	1005
ENSG00000065809.13	4104	3665	4517	5841	4382	4575	7780	5627	4980	5975	4121	7633	6523	5028	5773	6291	7066	7065	5699	7189	6855
ENSG00000065833.9	1038	980	1153	1574	1183	1245	2381	1667	1375	1962	1384	2395	3072	2576	2815	3771	4201	3865	3497	3980	4068
ENSG00000065882.16	956	1021	947	1106	1088	1027	1360	1263	954	1370	958	1547	1551	1303	1468	1754	1809	1759	1607	2307	1968
ENSG00000065883.16	1270	1232	1252	1586	1245	1435	2130	1499	1214	1932	1397	2126	2010	1728	1683	1944	2138	2072	1706	2400	2088
ENSG00000065911.12	738	568	714	856	615	676	1123	961	745	1215	805	1322	1522	1146	1341	2053	2286	2135	3093	4012	3341
ENSG00000065923.10	608	572	633	752	561	627	1030	745	618	912	633	1003	912	720	764	916	1025	921	666	896	854
ENSG00000065970.9	373	392	377	470	383	453	696	465	412	578	394	648	615	461	472	570	613	593	501	614	544
ENSG00000065978.19	8003.11	7629.18	7651.03	9119.28	7866.83	8513.91	11289	10813.4	7624.4	10148.7	7760.45	12038.3	11462.6	8946.37	11164.9	12869.5	12869	13575.3	12234.4	17429.8	14654.6
ENSG00000065989.16	38	33	35	29	34	14	66	38	17	49	37	45	53	45	41	69	58	62	92	139	115
ENSG00000066027.12	1400	1322	1516	1762	1498	1533	2546	1836	1505	1878	1379	2176	1758	1327	1600	1729	2000	1885	1308	1856	1616
ENSG00000066032.18	268	290	357	318	402	454	448	436	300	401	249	393	256	183	233	195	193	205	98	132	123
ENSG00000066044.15	1481	1471	1527	2041	1536	1579	2823	2065	1659	2208	1656	2686	2452	1899	2079	2488	2621	2738	2032	2617	2537
ENSG00000066056.14	3	2	2	6	3	1	4	3	1	1	2	2	2	4	0	2	1	1	1	3	0
ENSG00000066084.13	1184	1118	1371	1606	1172	1388	2292	1495	1308	1830	1296	2155	1752	1515	1524	1772	2240	1905	2077	2884	2468
ENSG00000066117.15	1009	936	972	1156	924	971	1710	1245	1013	1411	1062	1556	1500	1247	1393	1741	1910	1816	1554	2085	1852
ENSG00000066135.13	1306	1204	1409	1552	1349	1412	1861	1503	1234	1939	1311	2140.22	1829	1539	1669	1667	1869.65	1838	1191.56	1647	1563
ENSG00000066136.20	977	962	987	1169	1066	1074	1520	1321	1024	1275	942	1439	1182	940	1238	1121	1203	1232	833	1026	852
ENSG00000066185.13	23	26	34	50	40	40	53	46	44	34	39	48	28	33	38	32	43	40	13	27	12
ENSG00000066230.12	47.71	52.46	65.18	83.25	68.19	76.61	99.96	84.87	44.2	80.01	43.59	106.02	80.55	66.1	92.45	62.6	72.82	66.6	35.71	55.89	65.29
ENSG00000066248.15	588	655	676	727	688	731	923	860	634	756	556	867	619	449	600	389	391	381	161	198	168
ENSG00000066279.18	97	75	109	102	79	97	171	112	85	149	115	221	150	129	94	90	84	112	64	105	108
ENSG00000066294.14	0	0	0	0	0	0	0	0	0	0	0	0	1	0	0	0	0	0	0	0	0
ENSG00000066322.15	1596	1594	1666	2184	1666	1605	2914	2374	1900	2037	1577	2596	2211	1715	2281	2614	2872	2905	2513	3343	2938
ENSG00000066336.11	2	1	0	0	2	0	1	0	0	3	1	0	0	1	2	0	0	1	0	1	1
ENSG00000066379.15	170	159	136	201	157	152	246	214	160	191	137	189	207	147	215	237	225	231	197	298	202
ENSG00000066382.16	6	8	13	23	16	19	24	18	17	17	8	27	22	17	15	17	20	15	13	18	13
ENSG00000066405.13	87	77	90	98	73	84	104	74	93	123	97	157	122	87	131	165	205	193	192	297	237
ENSG00000066422.5	526	509	574	755	528	585	936	623	579	868	584	967	885	643	619	736	890	786	652	858	770
ENSG00000066427.24	294	358	359	512	348	464	693	490	364	503	376	580	573	468	441	497	581	536	468	627	523
ENSG00000066455.13	1425	1432	1473	1679	1508	1758	2014	1835	1329	2113	1455	2324	2032	1635	1731	1769	1806	1890	1438	1934	1753
ENSG00000066468.22	587	392	485	577	431	491	846	571	533	785	532	946	665	468	601	416	543	594	227	273	322
ENSG00000066557.6	687	602	739	973	727	827	1349	891	856	985	762	1336	1023	831	922	1002	1180	1135	798	1049	1002
ENSG00000066583.12	970	1090	1179	1408	1233	1298	2156	1548	1362	1503	1088	1823	1553	1119	1360	1198	1447	1494	913	1283	1078
ENSG00000066629.17	270	229	297	373	293	277	446	376	265	354	289	504	461	314	371	404	455	446	315	391	395
ENSG00000066651.20	207	180	222	272	196	241	396	296	244	316	230	375	401	263	321	405	494	474	401	486	485
ENSG00000066654.14	738	721	716	963	780	921	1355	1022	764	1129	780	1391	1085	847	1001	1025	1117	1083	915	1139	1002
ENSG00000066697.14	712	569	593	738	631	628	944	853.92	650	973	660	1166	1421	1051	1221	2044.94	2091.92	2015.94	2596.91	3684.84	3058
ENSG00000066735.14	2	6	16	3	0	9	9	9	12	4	5	7	6	9	7	6	7	15	12	28	9
ENSG00000066739.12	904	938	1189	1467	1030	1162	1943	1242	1081	1402	1050	1748	1361	1124	1155	1194	1342	1241	983	1366	1239
ENSG00000066777.9	1442	1286	1548	1867	1509	1545	2422	1685	1467	2173	1490	2596	2419	1886	1880	2322	2774	2322	2417	3201	2895
ENSG00000066813.14	1296.78	1562.65	1483.71	1734.38	1697.74	1852.05	2247.31	1649.94	1242.87	1713.4	1163.42	1892.38	938.85	672.6	1090.6	575.99	578.49	653.45	187.38	223.29	272.08
ENSG00000066827.16	199	173	154	168	160	171	226	172	153	228	170	271	238	198	205	285	220	237	206	278	265
ENSG00000066855.16	929	971	983	1375	1081	1159	1829	1396	1194	1436	1021	1654	1378	1045	1333	1301	1449	1526	1152	1497	1411
ENSG00000066923.17	10.03	8.02	7.07	10.49	12.19	14.21	11.75	10.08	15.05	18.11	14.11	15.96	16.81	12.32	16.6	7.12	12.23	13.17	7.08	11.25	6.29
ENSG00000066926.11	991	989	1051	1330	1127	1145	1855	1396	1204	1546	1139	1802	2021	1619	1730	2110	2385	2269	1567	2010	1938
ENSG00000066933.16	227	254	293	317	226	251	427	290	264	371	262	355	383	365	328	574	611	480	714	979	730
ENSG00000067048.17	0	0	0	0	0	0	0	0	0	0	0	0	0	0	0	0	0	0	0	0	0
ENSG00000067057.17	291	211	241	261	228	253	363	388	216	455	318	504	618	482	482	1111	1189	1005	2554	4032	2825.99
ENSG00000067064.11	13123	14696	16631	20900	17418	19458	27234	21492	15882	18283	14098	23870	16838	13585	15775	14957	15725	16202	10408	12749	12524
ENSG00000067066.17	786	880	827.18	981	898.1	937	1193.85	1010.58	769.95	1191	763.14	1323.65	1265	962.2	1011	1078.07	1220.18	1209.32	990.57	1274.82	1163
ENSG00000067082.15	5847	5138	5708	7519	5603	5878	10034	7355	6181	8927	6302	10295	9956	8363	8559	11972	13873	12104	14679	20067	16266
ENSG00000067113.17	893	788	799	1102	881	912	1381	1192	951	1031	816	1385	1168	961	1163	1200	1299	1323	964	1258	1283
ENSG00000067141.17	652	619	732	815	658	700	1058	678	673	1030	761	1178	1115	989	896	1149	1251	1268	985	1227	1067
ENSG00000067167.8	4819	4522	5472	7104	4990	5650	9678	7289	6196	7188	5060	9563	7585	5703	6841	7661	8290	7917	6542	8368	7315
ENSG00000067177.15	157.27	142.59	157	167.78	160	198	269.35	178.75	172	269.76	189.6	292.14	259.2	235	209	352.68	389.9	299.2	527.65	725.4	558.45
ENSG00000067182.7	1519	1359	1432	1697	1421	1563	2266	2060	1472	2065	1617	2271	2378	1803	2232	2953	3084	3049	3373	4630	3881
ENSG00000067191.16	23	19	21	19	17	13	20	19	16	27	23	24	28	24	37	60	52	59	72	113	76
ENSG00000067208.14	583	494	514	695	504	570	877	638	516	856	616	983	896	699	707	863	973	891	875	1038	1013
ENSG00000067221.14	363	319	326	399	325	335	536	489	322	459	340	530	502	383	449	555	527	603	385	625	437
ENSG00000067225.18	2985	2180	2456	3116	2310	2442	4188	3735	2774	4462	2870	4913	4378	3377	4247	6116	6656	6905	9347	13435	11892
ENSG00000067248.10	900	944	1005	1084	986	1157	1412	1146	806	1410	921	1627	1415	1014	1091	1092	1147	1156	757	966	953
ENSG00000067334.14	892	819	795	978	927	1017	1179	1153	803	1318	940	1557	1483	1311	1335	1879	1902	1934	2673	3545	3094
ENSG00000067365.14	390	402	385	471	363	422	628	542	373	540	392	541	599	493	555	690	708	700	591	798	666
ENSG00000067369.13	692	659	670	694	627	714	1061	704	648	1049	746	1072	1034	835	854	1026	1059	1057	1090	1360	1236
ENSG00000067445.21	644.36	645	608	743	645	639	868	787	591	884	617	908	771	699	842	766	864	847	666	861	806
ENSG00000067533.6	307	268	334	405	336	370	552	420	381	530	371	577	586	472	505	719	689	761	632	853	813
ENSG00000067560.12	6637	6469	7339	9632	7146	7781	13052	10004	8174	9090	6723	11494	9435	7573	9271	9887	10726	10721	8601	11390	10208
ENSG00000067596.12	644	619	726	797	713	778	1011	894	625	988	742	1115	1037	845	929	1013	1075	1058	947	1200	1151
ENSG00000067601.8	3.08	5	16.18	5.04	7.36	15	15	11.14	14	15.13	9	24	23.93	11.12	8.1	6.07	11.1	12.56	10	7	12.71
ENSG00000067606.17	1079	1009	1066	1181	1097	1106	1601	1400	1067	1404	1115	1573	1476	1169	1415	1632	1767	1719	1835	2548	2179
ENSG00000067646.12	0	0	0	0	0	0	0	0	0	0	0	0	0	0	0	0	0	0	0	0	0
ENSG00000067704.10	2202	2122	2433	3163	2449	2585	4014	3058	2393	3156	2246	3796	3269	2537	2802	2999	3248	3434	2245	2967	2782
ENSG00000067715.14	27	30	34	43	33	43	46	48	23	44	39	64	49	20	47	31	41	62	32	45	33
ENSG00000067798.16	67	62	54	81	66	72	72	54	56	96	38	97	80	62	68	50	70	65	77	89	92
ENSG00000067829.19	478	493	487	529	514	497	706	612	523	609	471	694	582	432	661	604	679	673	442	660	624
ENSG00000067836.12	800	832	774	822	766	821	1157	1056	751	932	752	1005	886	756	982.17	937	982	973.21	548	760	719
ENSG00000067840.12	0	0	0	0	0	0	1	0	1	0	1	1	0	0	3	4	3	3	8	2	3
ENSG00000067842.17	1	0	1	0	0	1	0	3	0	3	0	1	0	0	0	0	0	0	0	0	0
ENSG00000067900.8	1847.29	1764.5	1817.98	2107.98	1999.56	2204.47	2767.92	2247.81	1674.89	2938.17	1903.42	3254.83	2926.67	2269.66	2369.7	2720.4	2783.24	2729.33	2553.27	3436.88	3033.43
ENSG00000067955.15	591	478	566	688	519	568	1025	758	590	961	571	1002	1018	788	814	1069	1183	1128	1235	1837	1548
ENSG00000067992.15	726	802	958	1195	872	938	1753	944	897	1198	877	1421	1069	968	932	772	904	794	396	503	508
ENSG00000068001.14	999	908	894	1106	950	941	1452	1289	949	1236	1056	1414	1466	1350	1638	1864	1967	1853	1314	1730	1583
ENSG00000068024.16	260	263	308	328	261	308	476	339	280	479	302	475	575	470	453	585	581	566	440	601	544
ENSG00000068028.17	413	322	331	404	327	336	493	455	320	482	380	583	610	465	539	619	708	743	735	1030	874
ENSG00000068078.18	2277	2193	2067	2511	2260	2194	3248	2536	2058	2981	2284	3272	2967	2497	2763	2458	2661	2512	1128	1329	1371
ENSG00000068079.7	309	338	295	428	356	394	486	408	316	390	292	436	426	289	431	348	325	369	169	234	210
ENSG00000068097.14	319	308	339	403	334	374	519	425	304	566	324	553	490	365	413	404	401	477	298	372	375
ENSG00000068120.15	1700	1741	1580	2015	1918	1854	2539	2258	1762	2305	1732	2535	2458	1883	2496	2450	2472	2567	1809	2307	2155
ENSG00000068137.15	391	413	378	458	405	435	594	483	362	556	405	551	468	362	419	303	336	342	139	175	199
ENSG00000068305.17	1210	1135	1294	1733	1326	1420	2131	1530	1294	1815	1365	2163	1816	1454	1579	1768	2120	1893	1930	2486	2168
ENSG00000068308.13	2113	2172	2075	2539	2216	2331	3145	2789	2071	2861	2232	3247	2963	2422	3003	3297	3434	3360	2970	3930	3382
ENSG00000068323.17	2878	2812	2620	3205	2767	2722	4448	3471	2856	4500	3066	4670	5427	4708	5064	7437	7755	6981	8338	11148	9538
ENSG00000068354.16	531	462.93	477.95	620	478	494	790.88	652.58	456	662.88	510.95	791.92	711.95	505.63	653.75	672.79	830	777.96	676	853.68	771.8
ENSG00000068366.20	37283	41461	47526	60167	46016	53184	78870	55686	49022	55155	38946	72761	43382	33260	40169	31193	36650	36047	21143	24179	25274
ENSG00000068383.19	1131	1108	1049	1366	1196	1218	1922	1524	1150	1604	1104	1822	1765	1401	1535	1737	1739	1924	1452	1938	1704
ENSG00000068394.11	406	354	337	400	407	418	537	433	399	552	359	602	555	411	529	553	605	624	489	627	597
ENSG00000068400.13	1495	1490	1265	1454	1537	1518	2111	1711	1219	2194	1502	2108	2124	1905	2049	2249	2242	2142	1918	2623	2402
ENSG00000068438.15	360	337	330	431	377	347	554	465	360	483	363	622	552	432	526	567	662	597	473	680	593
ENSG00000068489.12	44	34	33	38	42	21	51	33	28	57	33	54	40	36	37	34	40	38	25	31	30
ENSG00000068615.18	143	159	185	238	189	220	347	227	219	228	176	279	228	186	217	282	279	219	257	406	293
ENSG00000068650.18	1991	1990	1958	2464	1969	2092	3273	2348	2209	3204	2249	3491	3398	2777	2855	3453	4083	3442	3121	4022	3608
ENSG00000068654.16	1104	1105	1062	1104	1113	1121	1565	1197	995	1794	1189	1773	2069	1779	1614	1887	2075	1847	1550	1954	1821
ENSG00000068697.7	4072	3787	4567	5955	4293	4676	8365	6111	5044	5520	3981	7090	5931	4384	5087	5338	5793	6274	4373	5725	5243
ENSG00000068724.17	477	532	524	613	553	477	824	594	492	694	530	733	729	618	683	745	765	715	480	659	563
ENSG00000068745.15	2504	2341	2297	2978	2376	2362	3842	3043	2551	3125	2286	3346	3057	2390	2903	2837	2983	3024	1763	2357	2352
ENSG00000068781.21	0	1.22	0	0	0	1.17	0	0	0	0	0	0	0	1.3	0	1.67	0	6.46	0	0	1.39
ENSG00000068784.13	205	206	220	288	207	280	292	252	213	310	235	423	321	242	310	319	293	331	241	281	321
ENSG00000068796.16	390	356	408	463	387	449	623	476	396	589	403	815	712	538	527	770	796	788	882	1149	1009
ENSG00000068831.19	1	3	1	0	0	0	2	1	0	5	2	1	2	0	2	3	0	3	2	2	1
ENSG00000068878.15	1499	1351	1630	2032	1609	1759	2746	1888	1694	2551	1649	3000	2802	2355	2369	3232	3776	3252	3797	5221	4459
ENSG00000068885.15	316	320.25	285.13	402	360	400	501.48	347.81	264.21	509	320.15	521.68	400.31	309.32	349.84	346.17	384.36	369	265.12	296.2	275
ENSG00000068903.20	1202	1242	1326	1480	1246	1353	1920	1518	1187	1648	1246	1771	1718	1257	1556	1539	1607	1572	1075	1459	1307
ENSG00000068912.14	1068	1016	1095	1513	1156	1190	1886	1526	1087	1532	1131	1765	1433	1065	1297	1177	1453	1343	1047	1415	1328
ENSG00000068971.14	525	495	404	546	542	540	734	681	546	702	513	842	818	660	773	847	836	854	651	804	667
ENSG00000068976.14	14	4	3	8	14	15	17	12	6	12	5	9	16	1	13	10	16	3	9	15	10
ENSG00000068985.5	0	0	0	0	0	0	0	0	0	0	0	0	0	0	0	0	0	0	0	0	0
ENSG00000069011.16	27	25	18	22	27	17	32	21	16	25	27	24	42	29	39	41	47	50	29	82	68
ENSG00000069018.18	0	0	0	0	0	0	0	1	0	0	0	0	0	0	0	0	0	0	0	0	0
ENSG00000069020.18	625	568	514	668	572	600	772	603	542	910	569	993	853	747	768	810	858	889	792	1030	923
ENSG00000069122.19	4	4	1	2	0	1	0	1	1	8	1	1	2	3	1	0	4	0	1	0	2
ENSG00000069188.17	133	95	125	120	133	130	156	145	88	248	176	209	228	225	173	278	276	277	294	401	364
ENSG00000069206.15	0	0	0	2	0	0	0	0	0	3	0	1	0	0	0	1	1	3	0	0	0
ENSG00000069248.12	846	829	1022	1205	932	1112	1672	1276	982	1365	919	1524	1393	1059	1087	1153	1445	1307	947	1271	1116
ENSG00000069275.13	4532	4628	5025	6332	4767	5511	8360	6035	5161	6566	4468	7985	5631	4498	4889	4186	4871	4997	3001	3707	3616
ENSG00000069329.18	2437	2308.99	2658	3596	2696	2803	4822	3591	2951	3782	2756	4760.97	4245	3442.99	3577	4485	5138.96	4800.99	4125	5431	5051
ENSG00000069345.12	1365	1255	1438	1806	1366	1498	2449	1999	1621	2013	1477	2386	2553	2097	2349	3007	3156	3181	2604	3546	3280
ENSG00000069399.15	625	582	518	583	576	611	815	724	572	849	567	900	900	716	903	1093	1104	1063	872	1096	1047
ENSG00000069424.15	25	28	27	30	35	27	47	34	29	39	35	31	55	23	31	26	44	48	42	40	41
ENSG00000069431.11	0	0	0	0	1	1	0	0	2	3	0	2	0	1	0	0	0	0	0	0	0
ENSG00000069482.7	9	13	14	20	8	15	26	25	25	13	12	32	30	17	12	49	64	73	198	291	194
ENSG00000069493.15	216.07	202.23	194.46	238.11	184.53	193.14	315.88	235.83	128.49	280.38	165.85	235.82	260.42	208.17	194.27	225.17	229.76	191.57	168.47	215.32	199.83
ENSG00000069509.6	259	208	219	306	286	255	421	328	227	280	247	404	366	254	301	320	303	362	250	333	342
ENSG00000069535.14	3995	4591	4652	5661	5062	5293	7351	6009	4371	5863	4300	6602	5552	4426	5063	4489	4650	4652	2060	2395	2360
ENSG00000069667.16	453	529	591	744	559	621	999	681	667	770	552	864	742	509	575	611	707	657	624	963	791
ENSG00000069696.7	25	15	16	22	28	15	44	14	22	20	28	19	36	38	13	13	24	11	20	8	16
ENSG00000069702.11	65	64	64	98	82	76	132	104	73	105	81	128	95	89	109	83	80	67	45	51	41
ENSG00000069764.9	4	5.87	10	4	5	1	2	2	3	3	3	4	4	0	6	3	2	3	2	1	0
ENSG00000069812.11	18	12	16	15	15	14	20	27	21	29	14	29	16	25	26	48	40	36	39	84	73
ENSG00000069849.11	879	689	872	1128	835	896	1513	1208	867	1101	879	1487	1313	1004	1219	1668	1669	1686	1886	2603	2463
ENSG00000069869.16	967	855	1018	1185	1041	1187	1667	1327	1048	1633	1097	1856	1805	1461	1384	1812	2087	1933	1623	2154	1953
ENSG00000069943.10	184	128	181	217	177	174	341	206	214	219	139	267	243	163	186	195	265	250	135	205	173
ENSG00000069956.12	3454	3360	3859	5194.98	4030	4246	6903.98	4950.98	4065	5471.98	3787	6933	6104	4792	5392	6482	7309.98	6953.98	7197	9456	7998
ENSG00000069966.18	490	509	528	644	568	571	1000	677	521	694	516	842	773	654	682	820	874	741	760	1108	941
ENSG00000069974.16	508.54	548.19	549.05	722.86	558	638.12	851.82	696.38	573.44	775.45	528.26	969.23	686.66	538.18	613.47	698.33	748.2	768.13	846.04	1178.22	1021.07
ENSG00000069998.12	406	403	427	478	434	407	619	586	453	579	429	644	653	558	628	730	738	777	604	673	674
ENSG00000070010.19	1519	1438	1535	1784	1572	1706	2345	2057	1529	2017	1533	2377	2210	1881	1946	2227	2083	2302	1619	2267	2107
ENSG00000070018.9	1271	1293	1592	1927	1388	1543	2784	1763	1462	2107	1576	2411	2071	1721	1756	1709	1998	1788	1125	1352	1377
ENSG00000070019.5	11	15	24	25	18	20	26	33	37	25	19	23	13	15	28	14	17	22	5	4	7
ENSG00000070031.4	0	0	0	0	0	0	1	2	0	2	0	0	0	0	0	0	0	0	1	0	0
ENSG00000070047.12	1796	1916	1638	1751	1947	1966	2460	1984	1437	2787	2012	2644	2970	2726	2802	3069	2882	3122	2532	3399	3064
ENSG00000070061.15	3944	4172	4402	5734	4627	4886	7004	5497	4323	4969	3555	6100	4289	3222	3845	3027	3319	3383	1590	1932	1947
ENSG00000070081.17	1188	989	1160	1410	1190	1224	1682	1500	1009	1451	1018	1727	1365	961	1260	1357	1258	1376	1081	1431	1218
ENSG00000070087.14	1488	1391	1705	2176	1592	1768	3118	2290	1857	2154	1639	2746	2685	2215	2421	3117	3242	3211	2530	3104	2823
ENSG00000070159.14	719	745	788	925	858	882	1187	1038	753	1135	836	1233	1259	993	985	1313	1444	1380	1616	2158	1582
ENSG00000070182.21	4	2	0	1	0	1	1	1	1	2	0	2	1	2	0	5	1	4	4	1	2
ENSG00000070190.13	0	0	1	1	0	0	1	0	0	0	0	1	2	0	0	5	5	1	6	10	4
ENSG00000070193.4	0	0	0	3	0	0	0	0	0	0	0	1	0	0	0	0	1	0	0	0	0
ENSG00000070214.16	2150	2176	2654	3266	2498	2769	4507	3055	2462	3155	2204	3757	3090	2504	2573	2550	2913	2704	1845	2248	2170
ENSG00000070269.14	372	350	454	597	476	458	785	520	499	623	414	771	644	525	527	602	618	569	446	585	508
ENSG00000070366.14	973	967	817	1045	987	1023	1393	1149	829	1445	1029	1516	1520	1241	1315	1422	1531	1510	1218	1496	1371
ENSG00000070367.16	1084.78	1062.99	1250.85	1535.91	1215.93	1254.92	2250.74	1476.87	1287.98	1817	1278.93	2274.69	1896.78	1667.93	1595.73	2046.95	2217.61	2092.75	2051.89	2649.55	2325.86
ENSG00000070371.16	330	325	324	354	316	296	467	376	287	578	345	518	541	438	431	524	572	566	405	469	476
ENSG00000070388.11	7	22	6	11	8	5	14	9	4	15	10	9	7	6	5	10	8	8	3	8	3
ENSG00000070404.10	7192	6487	5961	7601	6144	6307	8443	7555	5849	7773	5726	8594	6199	4028	5745	4191	4570	4848	3877	5687	4313
ENSG00000070413.20	2656	2613	2616	3344	2558	2760	4321	3427	2719	3702	2792	4080	3541	2909	3376	3301	3471	3497	1932	2596	2527
ENSG00000070423.18	1342	1367	1137	1564	1380	1346	2001	1757	1336	1610	1238	1836	1832	1419	1833	1931	1984	1997	1619	2295	1818
ENSG00000070444.15	536	541	513	545	560	531	838	582	476	814	469	796	861	668	758	930	1088	881	992	1305	1010
ENSG00000070476.15	636	665	682	867	666	715	1246	756	631	1087	735	1153	1055	957	899	1002	1145	981	873	1254	1125
ENSG00000070495.14	459	460	407	550	449	427	732	558	428	645	420	737	670.41	570.37	703	853.8	796	809	951	1390	1144
ENSG00000070501.12	320	280	327	404	341	398	578	476	341	448	307	498	544	380	456	559	658	644	519	669	585
ENSG00000070526.15	2	1	5	2	4	4	5	5	3	3	2	5	4	2	1	1	4	4	5	3	3
ENSG00000070540.13	431	455	444	611	486	507	736	646	494	608	495	696	615	513	581	667	705	698	864	1200	993
ENSG00000070601.10	64	65	63	53	78	61	89	70	54	63	53	92	38	33	44	19	28	27	5	3	6
ENSG00000070610.14	1825	1950	1898	2227	2005	1862	2729	2203	1754	2797	1952	2792	2911	2397	2649	3171	3126	2861	2858	3663	3241
ENSG00000070614.15	5259	5328	5639	6731	5410	5925	8756	6426	5326	7897	5579	8994	7357	6006	6537	5851	6605	6444	4276	5374	5261
ENSG00000070669.17	2648.34	2328.62	2497.73	3316.89	2660.03	2817.32	4421.03	3690.91	2747.69	4205.99	3139.09	4676.36	6893.46	5210.94	5268.18	8515.95	9626.72	8986.09	9766.9	12291.6	10969.9
ENSG00000070718.12	189	225	207	261	174	168	327	238	192	289	235	316	294	279	246	253	267	343	263	382	269
ENSG00000070729.14	4	2	0	1	1	5	0	0	1	3	0	1	4	1	1	3	0	3	0	2	0
ENSG00000070731.11	20.43	24.67	24.56	29.12	19.28	36.5	34.77	24.79	18.98	45.25	29.09	49.25	15.13	18.96	26.15	25.24	28.71	28.47	18.82	32.91	31.63
ENSG00000070748.18	0	0	0	0	0	0	0	0	0	0	0	0	0	0	0	0	0	0	0	0	0
ENSG00000070756.16	11160.7	10617.9	11395.9	14063.8	11844.9	12112.8	18104.8	14818.8	11315	15688.8	11604.9	18420.9	17277.9	13292.9	15676.6	17975.7	19055.7	18931.7	16771.6	22656.7	19492.7
ENSG00000070759.17	148.51	146	150.42	233	175	176	293	190	179.5	194	151.53	233	185	120.68	166	112.14	142	176	80	122	109
ENSG00000070761.8	363	348	359	477	369	363	609	486	365	450	343	539	464	356	434	447	465	517	350	558	419
ENSG00000070770.9	1444	1418	1602	1926	1574	1627	2585	1945	1675	2301	1604	2554	2428	1918	2175	2434	2761	2599	2574	3396	2961
ENSG00000070778.13	1773	1619	1704	1973	1777	1821	2527	1948	1616	2660	1855	2878	2928	2373	2322	2850	3146	3025	2337	2816	2684
ENSG00000070785.17	290	221	246	325	282	288	405	318	286	343	263	427	358	300	409	399	455	497	332	499	496
ENSG00000070808.16	0	1	2	4	1	0	8	2	2	1	0	4	1	1	1	1	1	4	4	8	9
ENSG00000070814.20	1032	1014	831	902	988	925	1179	1163	707	1616	1104	1559	1617	1425	1599	1686	1718	1883	1480	2050	1804
ENSG00000070831.17	6593.39	5856.6	6949.38	9195.25	6577.39	7171.47	12019.6	9103.57	7963.54	8883.58	6461.16	11333.5	9366.71	7191.65	8723.29	9571.45	11032.5	11247.8	8703.27	11616.6	10700.4
ENSG00000070882.13	387	375	422	492	349	405	695	486	403	719	399	758	776	643	680	877	1053	873	890	1233	1115
ENSG00000070886.12	0	2	0	2	1	1	3	0	4	4	1	7	2	2	4	0	2	1	0	1	0
ENSG00000070915.9	0	1	0	0	1	0	1	0	0	0	1	1	1	1	0	2	3	0	0	0	2
ENSG00000070950.10	149	119	127	191	137	166	233	201	160	212	129	254	203	154	210	196	224	184	179	256	211
ENSG00000070961.15	2541	2327	2728	3518	2490	2837	4715	3247	2801	4350	2918	4992	4255	3561	3608	4198	4999	4492	3606	4470	4394
ENSG00000070985.13	4	2	0	3	1	1	1	2	5	4	5	1	8	0	2	1	1	3	0	1	1
ENSG00000071051.14	1099	1012	933	1128	954	992	1485	1260	983	1400	1191	1687	1789	1554	1834	2456	2491	2466	2394	3449	2860
ENSG00000071054.16	4380	3791	4105	4636	4033	4420	5980	4680	3702	6461	4316	7028	6772	5745	5722	7244	7693	7642	7761	10172	8966
ENSG00000071073.13	455	448	519	655	541	568	1022	629	518	774	522	896	670	608	569	589	693	618	413	538	528
ENSG00000071082.11	6166.67	5449.71	5811.63	8630.16	6243.87	6610.85	9978.42	8630.71	6812.78	6544.84	5278.83	8691.66	7189.77	5184.69	7203.68	7963.63	7790.45	9874.78	6147.64	8882.07	8325.22
ENSG00000071127.17	8806	7695	8048	9564	8510	8585	11941	11299	8256	12316	8802	14159	13790	10829	12870	14776	15230	15818	15614	21663	18189
ENSG00000071189.21	661	648	725	924	660	765	1297	862	798	1037	714	1286	1063	770	830	902	1039	991	739	1023	894
ENSG00000071203.9	1	0	0	0	0	0	0	0	0	0	0	0	0	0	0	0	0	0	0	0	0
ENSG00000071205.12	12	23	13	20	26	12	34	25	25	33	24	32	39	34	39	40	57	59	63	102	79
ENSG00000071242.12	948	917	935	1141	938	967	1672	1191	973	1395	1138	1672	1759	1462	1494	2017	2263	1931	2177	2815	2333
ENSG00000071243.16	176	128	188	274	218	199	308	238	202	238	147	289	216	189	223	229	222	283	206	287	266
ENSG00000071246.11	36.25	29.6	36	45	41	45	44	37.73	31	51	41	54	39.89	26	41	47.74	29.03	67	28	32	29.95
ENSG00000071282.12	433	311	365	377	354	368	509	462	384	656	452	806	1252	914	1052	2231	2195	2089	3607	5159	4046
ENSG00000071462.11	966	970	996	1317	1137	1154	1810	1359	1093	1362	996	1646	1492	1173	1373	1539	1645	1564	1219	1700	1576
ENSG00000071537.14	4378	4111	4720	5979	4413	4991	7864	5198	4891	6310	4340	7420	5413	4337	4614	4892	5762	5140	5135	6824	5748
ENSG00000071539.14	56	31	38	50	24	42	73	51	35	83	43	98	76	56	79	91	106	105	85	126	114
ENSG00000071553.17	3025	2973	2996	3997	3202	3184	5414	4257	3414	3652	2995	4537	3526	2902	3653	3658	3831	3865	2885	3794	3396
ENSG00000071564.16	1221	1014	962	1088	1023	958	1360	1244	1063	1550	1188	1667	1917	1533	1860	2294	2451	2428	2182	2777	2362
ENSG00000071575.11	346	324	420	458	344	377	617	451	371	445	371	538	419	322	388	275	295	309	106	113	140
ENSG00000071626.16	1614	1546	1489	1943	1575	1642	2745	2038	1681	2318	1822	2394	2525	2092	2330	2506	2698	2524	2211	3335	2685
ENSG00000071655.18	2018.51	2131.45	1891.74	2188.35	2084.64	2070.29	3027.25	2488.08	1814.96	2874.79	2118.2	3065.71	2934.17	2486.19	2892.65	3176.69	3126.51	3241.76	2692.96	3402.55	2896.59
ENSG00000071677.1	0	0	0	0	0	0	0	0	0	0	0	0	0	0	0	0	0	0	0	0	0
ENSG00000071794.16	690	709	881	946	834	844	1296	987	730	1165	765	1411	1112	918	936	795	851	946	563	737	749
ENSG00000071859.15	997	919	912	1126	988	976	1416	1309	966	1423	952	1453	1620	1338	1605	2077	1969	1990	2251	3247	2594
ENSG00000071889.16	1226	1348	1145	1443	1306	1266	1880	1659	1200	1554	1282	1774	1779	1369	1740	1788	1777	1796	1249	1701	1496
ENSG00000071894.17	2564	2527	2195	2528	2367	2380	3350	2660	2237	3579	2519	3445	3410	2790	3113	3193	3208	3296	2476	3374	3016
ENSG00000071909.18	0	2	0	2	0	0	1	0	1	2	1	3	0	2	0	1	0	1	1	3	0
ENSG00000071967.12	3	4	7	19	3	1	7	3	3	5	5	1	5	4	4	1	0	0	1	5	6
ENSG00000071991.9	0	0	0	0	0	0	0	0	0	0	0	0	0	0	0	0	0	0	0	0	0
ENSG00000071994.11	785	741	773	1030	814	834	1411	1001	777	1063	839	1277	1162	947	1161	1385	1413	1407	1158	1575	1489
ENSG00000072041.17	0	0	0	1	0	0	0	0	0	0	0	0	0	1	0	0	0	0	5	4	3
ENSG00000072042.13	5075.45	5310.79	5834.51	6801.77	6023.61	6500	8492	7284.92	5634.21	6973.82	5248	8432.6	7286.49	5703	6556.79	6920.36	7469	7641.75	5217.61	6550.9	6330.84
ENSG00000072062.14	2123	2031	2195	2354	2157	2166	3284	2739	2192	2717	2192	3117	2718	2166	2726	2536	2696	2587	1761	2278	2069
ENSG00000072071.16	770	786	696	814	747	839	1020	799	672	1141	804	1171	1090	872	1029	936	1016	1040	595	827	755
ENSG00000072080.11	5	2	5	0	0	4	6	1	3	7	0	4	3	1	7	0	3	1	1	1	1
ENSG00000072110.13	3163.66	2869.42	2623	3062	2840	3000	3830	3754	2707	4575	3084.89	4818.84	4760	3566	4312	4787	4827	5071	5001	7012.17	6329
ENSG00000072121.16	1192	1165	1281	1493	1293	1340	2209	1386	1275	1826	1284	1975	1612	1415	1504	1684	1757	1627	1545	1981	1766
ENSG00000072133.11	277	278	293	417	306	372	582	357	340	466	317	478	385	271	280	309	345	306	240	296	308
ENSG00000072134.15	297	315	365	391	369	336	525	423	356	494	359	526	504	362	479	563	590	537	464	738	615
ENSG00000072135.13	871	834	850	1058	823	870	1272	1137	780	1234	864	1259	1261	1143	1033	1285	1379	1211	940	1148	1033
ENSG00000072163.19	77	67	69	78	66	73	123	96	97	124	68	98	124	91	99	132	139	143	137	194	161
ENSG00000072182.12	3	5	4	7	0	9	8	4	3	4	8	5	6	5	3	1	7	12	0	4	2
ENSG00000072195.15	30	25	24	23	24	23	36	32	32	56.98	44	58	70	53	61	84	108	100	201	279	238.95
ENSG00000072201.14	191	211	226	274	248	237	317	266	171	294	210	343	348	236	321	319	329	320	241	310	314
ENSG00000072210.19	6575	6127	6673	8822	6767	7253	11882	9240	7222	10339	7408	12591	12723	10183	11590	11530	12875	13533	7056	7864	8794
ENSG00000072274.13	969	948	1059	1390	1043	1166	1980	1358	1250	1667	1076	1928	2212	1602	1616	2192	2426	2306	2265	2693	2601
ENSG00000072310.17	4308	5201	4666	5350	4891	5090	7083	5725	4548	5624	4431	6075	4782	4071	5067	4488	4714	4495	3185	3968	3715
ENSG00000072315.3	4	2	3	10	0	4	5	5	5	7	2	12	4	6	4	11	7	6	2	2	2
ENSG00000072364.13	1983	1694	2037	2482	1857	2006	3361	2325	2010	3161	2151	3908	3474	2901	2728	4144	4893	4280	5659	7384	6509
ENSG00000072401.15	540	433	566	777	533	628	1003	796	653	830	608	1084	900	653	820	1070	1103	1131	980	1367	1173
ENSG00000072415.9	808	761	900	1105	875	916	1535	1045	930	1358	910	1486	1257	1002	971	1063	1231	1160	829	1013	1001
ENSG00000072422.17	725	569	602	792	588	618	1053	824	672	1087	718	1244	1240	943	1085	1413	1674	1518	1282	1823	1602
ENSG00000072501.17	802	787	882	917	922	1024	1201	950	730	1365	902	1404	1249	986	1070	1190	1217	1212	1082	1256	1280
ENSG00000072506.12	662	735	720	946	789	816	1175	1002	822	836	672	1034	854	660	895	845	818	1015	581	796	737
ENSG00000072518.20	870	971	812	958	994	920	1208	1132	829	1446	960	1438	1422	1121	1289	1443	1619	1465	1394	1873	1675
ENSG00000072571.20	57	65	54	75	63	42	114	60	50	91	60	117	63	61	79	49	63	75	34	46	39
ENSG00000072609.17	729	791	773	902.01	795	781	1264	886	699	1162	812	1295	1280.12	1063	1133	1357	1417	1386.01	1268	1641.01	1542
ENSG00000072657.9	2	6	7	6	6	6	7	4	4	9	7	10	10	7	4	3	3	0	3	4	4
ENSG00000072682.18	1239	1195	1227	1525	1185	1292	2058	1688	1242	1734	1304	2012	2080	1783	1994	2476	2583	2469	2335	3250	2761
ENSG00000072694.20	0	2	1	2	2	2	8	4	1	4	0	2	2	0	2	0	1	1	0	0	0
ENSG00000072736.19	930.06	910.79	973.84	1262.11	981.13	1097.86	1849.93	1206.65	1175.85	1340.77	976.25	1667.77	1366.96	1119.04	1128.62	1327.11	1526.52	1359.53	1003.13	1240.57	1147.13
ENSG00000072756.17	289	244	277	366	321	335	439	345	272	462	298	521	455	349	411	505	514	531	502	567	570
ENSG00000072778.20	6751	7038	6331	7810	7132	6849	10503	9121	6851	9590	7327	10196	11296	9311	10822	12457	12453	12146	9608	13384	11431
ENSG00000072786.13	306	264	259	298	251	243	376	320	233	410	294	501	492	455	439	578	651	568	1022	1413	1069
ENSG00000072803.17	1213	1196	1272	1658	1160	1341	2184	1609	1416	1824	1344	2172	1919	1550	1681	1989	2215	2123	1883	2562	2228
ENSG00000072818.12	13	7	11	14	7	5	10	11	13	8	9	11	15	4	15	7	12	18	8	5	8
ENSG00000072832.15	9	6	10	1	8	7	11	14	5	8	4	10	11	7	8	11	11	8	8	13	7
ENSG00000072840.13	653	617	644	668	668	678	945	723	481	927	711	946	914	787	767	769	759	711	436	510	532
ENSG00000072849.11	1055	950	1048	1545	1208	1292	2042	1464	1255	1318	970	1685	1301	1043	1314	1208	1331	1410	1018	1397	1157
ENSG00000072858.10	0	1	0	0	0	0	0	0	0	0	0	0	0	0	0	0	0	0	0	0	0
ENSG00000072864.15	109	138	126	130	122	124	177	151	134	209	120	222	185	145	159	223	247	204	293	411	339
ENSG00000072952.18	83	81	99	121	107	89	151	109	69	99	82	144	88	73	87	59	47	81	26	23	17
ENSG00000072954.7	175	184	194	212	223	219	316	269	189	259	236	365	290	238	257	325	284	317	250	335	307
ENSG00000072958.8	2141	2243	2153	2724	2329	2450	3591	2920	2289	2890	2194	3388	3180	2386	2994	2873	2976	3073	1803	2458	2227
ENSG00000073008.15	3829.65	3442.96	3440.74	4027.9	3613.69	3810.73	5138.51	4360.69	3445.74	5287.57	3577.64	5778.34	5542.79	4720.77	5076.45	6467.49	6950.39	6673.7	8644.62	12235.6	10228.9
ENSG00000073050.11	343.96	296.9	293	333	282	330	443	426	316	470	341	578	404	313	441	448.92	423	461	334.89	451.92	432
ENSG00000073060.16	5957	6214	5849	7528	6370	6732	9979	8024	6261	8207	6280	9164	8353	6508	7991	7310	7688	7594	3672	4430	4440
ENSG00000073067.14	13	13	6	12	22	12	27	8	16	16	18	14	12	17	12	5	7	5	0	1	2
ENSG00000073111.14	233	191	205	265	189	179	260	259	175	306	184	319	279	210	287	287	313	309	275	301	285
ENSG00000073146.16	4	3	3	5	6	4	6	8	8	2	0	0	12	3	3	11	2	5	4	9	3
ENSG00000073150.14	128	117	91	113	88	88	178	137	90	170	148	167	229	248	232	294	294	255	362	430	431
ENSG00000073169.14	1087	1216	1052	1307	1290	1135	1738	1447	1087	1485	1033	1512	1330	1061	1400	1124	1165	1231	627	761	694
ENSG00000073282.13	2	1	1	0	1	2	2	2	0	0	0	3	0	1	0	1	2	0	7	7	8
ENSG00000073331.18	128	123	150	163	176	179	211	173	141	198	107	189	184	178	160	195	208	191	198	276	192
ENSG00000073350.13	2136	2250	1953	2406	2142	2151	3022	2522	2066	2745	1872	2832	2752	2393	2686	2986	2857	2880	2049	2689	2464
ENSG00000073417.15	929	926	1004	1254	1074	1053	1637	1151	958	1472	1004	1687	1485	1159	1342	1389	1598	1512	1276	1700	1399
ENSG00000073464.12	306	292	312	384	357	339	522	382	296	470	316	457	391	321	349	328	373	419	303	393	333
ENSG00000073536.18	256	196	233	282	193	213	330	295	255	344	259	352	472	349	391	499	503	513	490	608	591
ENSG00000073578.17	3832.62	3815.78	3782.11	4537.6	4297.13	4312.31	5533.78	5069.1	3785.77	4982.15	3714.18	5701.3	5116.9	4035.24	4894.26	5039.9	4976.73	5194.16	3971.98	4790.73	4333.03
ENSG00000073584.20	2213.25	2142.32	2275.81	2628.76	2331.83	2577.45	3289.09	2908	2232	3181.03	2254.92	3667.36	3540.18	2788.43	3079.24	3594.62	3574.16	3781.58	2635	3209.47	3127.35
ENSG00000073598.6	0	1	0	0	1	0	2	0	0	0	0	0	0	1	0	0	0	0	0	0	0
ENSG00000073605.18	798	901	766	1056	912	1002	1318	893	723	1185	748	1215	1059	882	846	774	799	746	491	588	625
ENSG00000073614.13	800	763	930	1087	931	958	1393	961	828	1441	932	1593	1296	1168	1022	1223	1339	1256	1125	1483	1472
ENSG00000073670.14	40	31	38	36	44	22	47	25	34	44	36	34	34	30	28	29	47	19	20	24	25
ENSG00000073711.11	288	304	313	398	306	358	513	378	336	474	290	552	492	416	421	471	473	450	431	547	489
ENSG00000073712.15	1548	1520	1613	2065	1625	1752	2750	2122	1596	2426	1684	2771	2582	1921	2149	2458	2795	2728	3105	4244	3379
ENSG00000073734.10	1835	2016	1997	2292	2149	2354	3064	2212	1710	3355	2196	3486	3797	3257	2964	2915	3095	3036	1649	1871	2137
ENSG00000073737.16	0	0	1	1	0	0	0	0	0	0	0	0	1	2	1	0	5	2	8	13	10
ENSG00000073754.6	0	0	0	0	0	0	0	0	0	0	0	0	0	0	0	0	0	0	0	0	0
ENSG00000073756.12	2	1	1	1	0	0	2	1	1	0	0	2	1	0	0	1	0	0	5	3	2
ENSG00000073792.15	2758	2843	2749.99	3126.99	3042	3249	4012.99	3585	2681	4297	3042	4754	4789	3932	3956	5085	5044	4935	4876.99	6519	5676
ENSG00000073803.14	624	626	694	852	670	729	1162	839	656	923	689	1076	861	698	793	784	770	837	574	706	597
ENSG00000073849.15	6015	7188	7627	9781	7627	8617	13957	9370	8192	8817	6742	10954	6780	5117	6874	4265	4828	4825	1897	2325	2469
ENSG00000073861.3	1	0	0	0	0	0	0	0	0	0	0	0	0	1	1	0	0	0	0	3	2
ENSG00000073905.8	16.42	10.19	17.48	16.28	22.26	22.34	33.72	17.35	30.62	14.15	13.21	39.78	20.34	17.27	26.53	29.64	33.85	33.65	24.35	26.34	39.76
ENSG00000073910.22	203	172	169	269	179	185	325	208	188	287	192	305	226	133	191	170	176	197	158	191	183
ENSG00000073921.18	2862	2763	3192	3958	3099	3336	5143	3826	3205	4347	3022	5175	4429	3652	3897	4516	5002	4818	4916	6932	6000
ENSG00000073969.18	1039.62	959.03	1194.62	1389.56	1141.44	1214.55	1936.84	1445.13	1150.95	1311.83	1099.27	1791.43	1386.01	1015.73	1205.91	1272.89	1337.54	1290.85	851.54	1111.67	1040.4
ENSG00000074047.21	0	0	0	1	0	0	1	0	1	1	0	0	3	4	0	2	1	1	0	3	0
ENSG00000074054.18	1656	1547	1615	1980	1605	1725	2588	1912	1556	2630	1723	2664	2448	2080	2193	2201	2531	2354	1932	2405	2364
ENSG00000074071.14	1152	1053	1082	1438	1226	1226	1833	1654	1207	1339	1113	1694	1545	1342	1709	1629	1506	1821	1043	1365	1293
ENSG00000074181.9	23	23	21	28	28	18	27	32	25	46	24	47	40	23	37	59	77	51	163	222	149
ENSG00000074201.9	1018	973	1053	1286	1034	1141	1742	1385	1215	1467	993	1816	1542	1264	1460	1760	1767	1859	1605	2081	1938
ENSG00000074211.14	14	8	11	18	11	6	25	23	13	22	17	23	29	14	23	40	61	40	86	137	89
ENSG00000074219.13	833	582	667	755	669	646	951	909	753	1054	781	1221	1410	1162	1451	2010	2176	2113	1908	2578	2363
ENSG00000074266.21	290	249	247	344	298	265	476	327	322	448	304	446	402	314	356	353	414	448	335	447	448
ENSG00000074276.10	116	122	133	140	161	138	188	164	117	188	107	179	124	115	152	125	175	129	166	216	175
ENSG00000074317.11	0	0	0	0	0	0	0	0	0	0	0	0	1	0	0	0	0	0	0	1	0
ENSG00000074319.13	1175	1170	1361	1747	1291	1444	2179	1820	1453	1635	1236	2196	1911	1411	1629	1996	2140	2296	1767	2441	2238
ENSG00000074356.17	1152	1126	1236	1531	1238	1261	2075	1393	1162	1848	1249	1942	1976	1684	1542	1785	2070	1728	1522	1948	1877
ENSG00000074370.18	7	8	10	3	11	8	13	8	6	14	13	17	16	15	7	6	10	15	20	20	20
ENSG00000074410.14	548	646	700	903	766	823	1288	958	843	1091	766	1198	1570	1394	1453	2190	2411	1873	3559	5257	3686
ENSG00000074416.14	677	571	572	661	516	552	820	714	584	923	613	1037	939	817	969	1981	2210	1787	6574	10505	7047
ENSG00000074527.12	613	494	568	695	525	513	916	753	657	875	620	1107	1164	939	1031	1669	1947	1673	2589	3500	3016
ENSG00000074582.14	504	539	532	739	560	578	980	767	607	795	487	827	807	597	697	851	816	818	576	739	747
ENSG00000074590.13	328	307	353	366	342	350	503	381	357	483	387	578	430	340	371	296	345	351	196	286	287
ENSG00000074603.19	554	536	634	801	589	710	1162	764	669	875	607	984	889	696	755	719	856	762	582	732	741
ENSG00000074621.14	190	228	211	250	229	208	269	216	148	304	221	290	310	246	220	191	219	248	121	137	139
ENSG00000074657.13	781.77	675.94	753.99	860.99	779.93	814.99	1124.93	867.99	697.93	1252.96	833.99	1309.93	1182.92	1095.94	988.99	1273.96	1356.94	1355.81	1267.93	1645.93	1451.97
ENSG00000074660.16	60	90	69	76	82	70	116	76	72	110	79	84	88	75	66	68	66	55	34	69	64
ENSG00000074695.6	2572	2770	3167	3918	2919	3340	5371	3813	3124	4127	2887	5269	4331	3180	3328	3530	4120	3994	3324	4384	3870
ENSG00000074696.13	4795	4761	5129	6516	5180	5568	8643	6703	5393	6336	4708	8049	7037	5651	6832	7569	8027	7905	5336	6538	6338
ENSG00000074706.13	19	17	13	23	20	23	28	21	17	37	10.88	36	31	14	12	15	34	23	20	24	16
ENSG00000074755.15	1128	1161	1172	1331	1086	1157	1873	1324	1103	1782	1215	1863	1638	1388	1418	1449	1642	1418	1202	1592	1512
ENSG00000074771.4	0	0	0	1	0	0	0	0	0	0	0	0	0	0	0	0	0	0	0	0	0
ENSG00000074800.16	12392	12121	12364	15762	13160	13691	20500	18318	14335	17838	13386	21395	23409	19071	23429	30687	31048	32771	30799	41069	36136
ENSG00000074803.19	0	0	0	4	0	0	0	0	0	0	0	0	0	0	0	0	0	1	0	1	0
ENSG00000074842.7	1214	1156	1203	1674	1313	1241	1951	1725	1300	1499	1196	1889	1637	1269	1713	1747	1676	1926	1511	2286	1830
ENSG00000074855.11	395	436	309	330	335	359	510	382	263	575	396	512	645	593	582	799	783	692	557	698	681
ENSG00000074935.14	288	289	302	399	308	367	633	375	336	490	309	537	478	363	336	442	550	516	355	484	457
ENSG00000074964.17	2138	2401	2122	2549	2330	2366	3203	2519	2011	2768	2089	2919	2331	1889	2261	1722	1790	1827	1149	1569	1387
ENSG00000074966.11	5	5	10	3	5	4	24	8	9	10	13	15	5	9	7	17	20	10	19	23	24
ENSG00000075035.10	0	0	2	0	0	0	0	4	0	0	0	0	0	0	0	0	0	0	0	0	0
ENSG00000075043.18	3	0	1	0	0	2	2	2	0	0	0	1	2	1	3	0	0	0	0	0	0
ENSG00000075073.15	0	0	0	1	0	1	0	0	0	0	1	0	0	0	0	0	0	3	0	0	0
ENSG00000075089.9	261	240	278	394	281	322	556	389	273	354	293	476	371	321	304	342	404	427	301	390	353
ENSG00000075131.10	30	42	40.96	54	50	34	50	42	30	43	34	79	58	29	45	40	60	71	44	43	52
ENSG00000075142.13	1347	1222	1408	1838	1377	1370	2184	1847	1481	1609	1258	2149	1826	1386	1711	1919	1961	2267	1517	2124	2014
ENSG00000075151.20	1349	1243	1171	1359	1246	1395	1800	1432	1142	2080	1393	2200	2197	1756	1779	2251	2375	2230	2494	3012	2832
ENSG00000075188.9	270	198	287	422	304	332	506	384	307	322	243	516	345	292	349	401	429	422	184	292	274
ENSG00000075213.11	13	11	9	6	5	14	16	6	15	8	5	12	17	12	10	14	16	21	7	18	8
ENSG00000075218.19	53	26	25	31	33	37	54	34	40	67	41	60	45	25	44	39	38	43	18	49	41
ENSG00000075223.14	64	62	76	87	67	69	139	85	93	121	95	149	106	57	57	46	67	64	33	50	52
ENSG00000075234.17	2906	3194	3099	3939	3459	3358	5215	4127	3182	3818	3005	4451	3839	2904	3559	3215	3380	3385	1851	2428	2309
ENSG00000075239.14	1430	1436	1574	2010	1760	1839	2580	2136	1513	1904	1367	2280	1926	1427	1798	1967	1943	1999	1203	1641	1570
ENSG00000075240.17	769	772	757	848	837	848	1176	928	683	1075	783	1127	1165	964	1017	1048	1129	1080	889	1219	1072
ENSG00000075275.16	526	492	513	509	500	530	673	581	436	921	552	828	888	855	729	945	1025	965	1202	1646	1309
ENSG00000075290.8	0	4	1	3	2	4	9	4	3	6	1	7	5	0	3	3	3	0	0	0	1
ENSG00000075292.19	1889	1964	1974	2234	2235	2245	2814	2333	1646	3149	2143	3260	3180	2609	2416	2756	2749	2841	2255	2939	2788
ENSG00000075303.13	370	381	446	600	439	471	798	558	434	557	378	701	502	324	472	436	448	460	238	324	261
ENSG00000075336.12	343	317	353	486	387	369	570	465	364	460	324	499	501	376	501	492	520	522	309	479	419
ENSG00000075340.23	1	1	0	0	2	0	0	5	1	2	1	3	3	4	0	3	2	1	4	5	6
ENSG00000075388.4	0	0	0	0	0	0	0	0	0	0	0	0	0	0	0	1	0	2	0	3	0
ENSG00000075391.16	533	408	494	695	499	563	807	667	552	804	537	989	772	550	644	697	745	775	665	854	808
ENSG00000075399.14	667	631	606	674	562	650	928	774	539	765	601	787	845	684	848	790	762	744	505	674	592
ENSG00000075407.18	352.12	317.31	310.52	396.56	327.96	404.79	482.19	341.38	268.23	542.02	324.29	509.09	558.19	423.21	430.97	499.47	592.97	494.98	549.5	694.65	697.79
ENSG00000075413.18	1419	1364	1412	1624	1530	1489	2179	1704	1254	2166	1451	2309	2134	1692	1881	2113	2089	2156	1841	2474	2317
ENSG00000075415.12	11423	10955	12199	16051	12564	13202	20041	16524	13045	15353	11368	18849	16393	12886	15679	17467	18247	19489	13361	17193	16438
ENSG00000075420.13	2140	1974	2158	2587	1975	2050	3486	2550	2192	3243	2262	4062	3561	2828	2942	3998	4543	4176	4610	5821	5326
ENSG00000075426.12	697	617	683	726	593	615	985	780	557	1021	759	1170	1286	1064	1041	1632	1882	1687	2549	3591	2862
ENSG00000075429.8	0	0	0	0	0	0	0	0	0	1	0	0	0	0	0	0	0	0	0	0	0
ENSG00000075461.6	17	17	13	22	12	20	28	16	31	15	13	23	41	22	22	67	99	88	125	190	160
ENSG00000075539.14	494	508	604	638	520	553	934	644	532	801	589	950	848	634	650	769	839	785	738	946	868
ENSG00000075568.17	1626	1648	1726	2004	1735	1789	2630	2037	1592	2387	1807	2746	2440	2016	2192	2294	2517	2575	2225	2796	2418
ENSG00000075618.18	806	662	598	686	614	548	904	858	680	1135	846	1237	1096	870	1104	1560	1660	1673	2046	3072.99	2594
ENSG00000075624.16	105708	96952	106574	132614	105565	104317	172654	144970	118866	139062	105118	165971	150630	116488	147262	163283	174974	176522	133940	179566	157237
ENSG00000075643.6	444	552	613	776	673	646	1134	787	648	897	587	1033	1157	940	954	1066	1305	1119	1153	1511	1211
ENSG00000075651.16	499	466	480	658	495	558	739	587	524	781	468	872	655	596	605	721	783	792	731	958	810
ENSG00000075673.11	0	0	0	0	0	0	0	0	0	0	1	0	0	0	0	0	0	0	0	0	0
ENSG00000075702.18	79	58	55	74	84	88	103	68	85	136	95	124	108	92	79	70	105	75	72	119	105
ENSG00000075711.21	1615	1536	1667	2006	1608	1813	2744	2044	1544	2355	1672	2751	2449	1945	1995	2087	2325	2219	1498	1931	1806
ENSG00000075785.12	3559	3464	4023	4727	3880	4078	6437	5287	4002	5095	3790	6173	5469	4236	5245	6553	6978	6868	7235	10157	8216
ENSG00000075790.10	502.77	434.27	538.85	649	520.7	570.6	917.19	690	545.87	763	532	926	815.55	656	695.37	845	897	809	783.98	1077.97	966.7
ENSG00000075826.17	368.22	406.44	408.63	476.1	408.24	391	702	431.82	366	545.73	434.64	502.11	473.25	377.4	390.34	329	363.86	327.78	168.22	217.37	164
ENSG00000075856.12	941	951	882	1073	924	962	1320	1168	890	1467	985	1474	1476	1174	1224	1376	1441	1563	1225	1627	1501
ENSG00000075884.14	6	1	5	7	5	6	9	4	4	3	4	4	2	2	0	2	1	3	3	0	3
ENSG00000075886.11	4	8	4	5.64	9.66	8	3	2	3	2.25	2	9.57	6.61	4.44	1	3	2.19	6	3	0	0
ENSG00000075891.21	0	1	0	0	0	0	0	0	0	0	1	1	0	1	0	0	0	0	1	4	1
ENSG00000075914.13	462	480	463	611	459	531	795	667	457	613	501	744	679	572	651	741	727	824	605	804	681
ENSG00000075945.13	579	586	545	700	651	695	961	758	546	862	652	987	858	683	726	883	777	888	597	785	754
ENSG00000075975.16	655	620	613	847	680	733	1137	910	712	854	691	1060	909	720	890	934	1115	1032	880	1096	1038
ENSG00000076003.5	249	198	204	229	218	250	427	316	240	391	237	418	423	300	373	414	376	424	288	404	386
ENSG00000076043.10	827	725	762	1018	815	863	1323	1037	852	1108.92	755	1279	1180.96	922	1171	1365	1541	1548	1335	1869	1584.96
ENSG00000076053.10	693.75	586	750.13	916	699.72	765	1314.48	913.84	777	887.85	640	1296.54	1072.49	752	909.98	1076.6	1183	1317.85	1082.88	1364.46	1342.03
ENSG00000076067.13	898.41	891.51	860.28	1088.49	850.57	936.53	1551.91	1022.14	967.27	1304.34	878.18	1474.15	1273.58	1092.09	1195.71	1388.02	1664.07	1483.26	1153.03	1473.75	1416.03
ENSG00000076108.11	2192	2368	2333	2599	2369	2461	3433	2529	2165	3563	2371	3624	3354	2870	2753	3124	3403	3205	2789	3681	3426
ENSG00000076201.15	1927	1994	1809	1865	1893	1900	2628	2258	1704	2930	2030	2900	3209	2715	2939	3733	3768	3406	3462	4538	3764
ENSG00000076242.14	523	466	496	661	524	568	811	603	542	656	500	828	684	565	641	607	643	694	566	656	603
ENSG00000076248.10	830	847	914	1052	960	959	1580	1204	995	1111	881	1357	1137	958	1036	996	1055	1117	577	694	707
ENSG00000076258.10	175	170	261	262	194	258	309	283	233	261	173	307	197	149	191	174	155	176	76	93	91
ENSG00000076321.11	703	735	751	839	730	904	1223	883	738	1161	703	1199	988	805	785	967	1101	1004	741	998	907
ENSG00000076344.16	1	0	0	1	1	0	0	0	0	0	2	3	0	0	0	1	1	3	3	7	2
ENSG00000076351.13	2604	2828	2702	3170	2821	2983	4057	3279	2597	4030	2793	4234	4356	3674	4082	3883	4136	4120	1967	2491	2441
ENSG00000076356.7	426	466	462	473	408	431	707	530	377	691	469	693	704	585	565	702	833	716	951	1459	1124
ENSG00000076382.17	302	295	294	338.65	366.69	385	424.41	399	269	413	314	482	333	262	295	204	210	285	83.05	119.12	145
ENSG00000076513.17	1329	1358	1402	1721	1448	1551	2219	1645	1369	1848	1349	2069	1795	1410	1495	1443	1604	1679	1109	1405	1281
ENSG00000076554.15	587.83	657.71	717.15	946.89	703.79	764.29	1176.49	914.46	761.52	984.83	681.61	1181.43	1099.81	858	993.51	1189.85	1292.83	1223.76	1026	1372.82	1140.47
ENSG00000076555.15	608	754	664	804	784	824	1017	719	597	942	682	947	727	697	636	435	476	516	117	158	165
ENSG00000076604.15	2177.91	1903	1810.98	2470.96	1920	1906	3068.98	2651.97	2053.96	3060	2241.99	3350.99	3323.95	2789.97	3338.96	4244.96	4372.99	4287.94	4248.99	5606.96	4784.97
ENSG00000076641.4	1100	1096	1251	1666	1224	1279	2169	1483	1316	1774	1261	2150	1617	1277	1436	1053	1430	1254	746	1044	948
ENSG00000076650.7	246	234	204	277	234	301	333	284	234	347	273	369	354	302	356	326	366	351	258	362	347
ENSG00000076662.10	258	258	249	351	281	258	412	376	250	311	266	359	319	219	350	274	255	307	105	133	112
ENSG00000076685.18	2099	1839	2006	2419	2017	2032	3280	2414	1930	2859	2044	3435	2905	2151	2484	2696	3018	2778	2273	3003	2859
ENSG00000076706.17	77	51	55	69	66	99	104	94	85	129	87	139	108	108	81	173	179	191	258	457	353
ENSG00000076716.9	161	141	156	196	154	146	256	158	187	280	166	337	246	203	251	512	584	487	1391	2068	1536
ENSG00000076770.14	19855	21822	25403	33134	23846	27257	42021	27687	26553	28326	19844	35651	21619	15258	18715	12272	15010	14806	4822	5193	6242
ENSG00000076826.9	1564	1414	1295	1483	1588	1618	2311	2000	1099	2043	1478	2310	2589	2305	2835	3178	2871	3024	2552	2882	3051
ENSG00000076864.19	1378	1291	1288	1438	1322	1318	1840	1638	1245	1975	1385	1960	2110	1810	2040	2673	2787	2732	2695	3417	3197
ENSG00000076924.12	797	771	728	958	793	824	1275	1058	741	1060	759	1201	1058	895	1070	1143	1139	1163	891	1210	1069
ENSG00000076928.17	926	1002	889	969	939	970	1334	1113	860	1479	1011	1488	1492	1218	1305	1487	1540	1506	1361	2071	1687
ENSG00000076944.16	1225.43	1058	1028	1175.27	1141	1141	1536	1461	986	1653	1100	1596	1623	1340	1509	1833	1871	1849.77	1749	2355	1942
ENSG00000076984.17	873	808	770	842	823	803	1206	901	733	1140	863	1146	1295	1005	1121	1308	1387	1397	1272	1761	1594
ENSG00000077009.13	1	0	1	0	0	0	0	0	0	0	0	0	1	0	0	0	4	3	8	27	5
ENSG00000077044.10	495	495	502	525	503	572	785	618	509	843	560	806	828	784	817	900	1055	927	1004	1476	1151
ENSG00000077063.11	26	17	20	24	15	23	24	31	28	48	24	38	28	33	33	40	45	40	31	23	41
ENSG00000077080.10	0	0	1	0	0	0	0	0	0	0	0	1	0	0	2	0	1	0	0	1	0
ENSG00000077092.19	322	259	288	378	268	274	463	355	294	446	266	502	433	341	410	444	496	539	271	346	406
ENSG00000077097.15	1687	1465	1693	1894	1779	1854	2299	1977	1493	2649	1674	2971	2537	1981	2027	2356	2342	2456	2069	2688	2478
ENSG00000077147.16	3439	3126	3643	4839	3527	3985	6656	4574	4022	5390	3721	6509	5519	4259	4620	5191	6095	5516	5130	7042	6114
ENSG00000077150.20	1248	1093	995	1169	1128	1092	1507	1405	905	1609	1202	1773	1655	1340	1702	1916	1993	2079	2149	2964	2584
ENSG00000077152.11	59	41	57	76	58	45	96	71	69	60	56	94	67	53	93	71	76	117	62	80	50
ENSG00000077157.22	387	388	405	470	353	403	615	450	360	613	410	669	551	579	441	479	626	503	384	461	492
ENSG00000077232.18	2156	1967	2253	2973	2278	2385	3910	2820	2548	3258	2300	3896	3283	2658	2951	3487	4052	3575	3322	4502	4087.42
ENSG00000077235.18	1681	1831	1720	1847	1734	1865	2377	1990	1510	2700	1833	2682	2582	2116	2215	2359	2534	2434	1990	2803	2445
ENSG00000077238.14	1759	1738	1705	1912	1815	1773	2433	2113	1550	2427	1746	2567	2333	1987	2274	2671	2804	2726	3404	4623	3792
ENSG00000077254.14	879	864	1096	1294	980	1121	1689	1136	992	1400	991	1683	1548	1148	1181	1335	1427	1386	1167	1353	1202
ENSG00000077264.15	318	328	364	395	322	383	609	357	279	467	321	511	429	343	349	410	446	415	287	329	371
ENSG00000077274.9	26	15	18	14	14	21	18	29	31	17	29	25	24	18	42	27	18	26	19	13	15
ENSG00000077279.18	15	28	19	17	14	7	18	12	14	14	15	24	20	16	21	8	17	22	8	10	8
ENSG00000077312.9	466	488	432	530	431	427	712	674	493	584	425	576	631	471	574	630	677	731	503	649	588
ENSG00000077327.16	1	3	3	4	6	1	6	2	2	4	0	5	5	2	3	4	1	4	6	0	4
ENSG00000077348.9	68	48	55	68	64	67	80	82	62	75	64	92	98	69	80	119	115	115	104	132	94
ENSG00000077380.15	1796.3	1584.55	1842.89	2222.94	2004.84	1964.24	2863.68	2348.87	1889.15	2721.49	1899.45	3186.25	3020.71	2291.41	2804.4	3308.98	3681.74	3619.74	3164.43	4274.5	3787.87
ENSG00000077420.16	408	385	400	485	422	490	584	549	367	588	416	709	621	466	622	639	661	667	486	648	600
ENSG00000077454.16	1238.26	1259.74	1194.23	1325.33	1318.02	1315.11	1887.59	1572.78	1224.63	1807.56	1296.06	1857.99	1873.51	1567.89	1880.47	2021.42	2075.14	1882.19	1608.66	2322.78	1978.26
ENSG00000077458.13	491	470	498	628	521	577	890	634	550	687	482	772	579	473	562	438	551	514	318	449	359
ENSG00000077463.15	383	334	326	377	285	375	472	450	323	467	320	481	495	401	491	618	540	605	574	676	652
ENSG00000077498.9	0	0	0	0	0	0	0	0	0	0	0	0	0	0	0	0	0	0	0	0	0
ENSG00000077514.9	176	164	176	235	194	219	239	223	163	229	188	343	295	226	223	248	265	306	206	251	248
ENSG00000077522.13	0	0	1	2	2	1	4	1	0	2	1	2	1	0	4	6	4	2	7	11	7
ENSG00000077549.18	3768	3477	3683	4421	4001	4196	5446	5268	3710	4842	3542	5767	5123	3935	5052	5127	5112	5805	4206	5396	5062
ENSG00000077585.14	41	40	39	48	62	47	94	70	62	47	44	71	98	82	64	94	110	128	202	310	211
ENSG00000077616.11	372	336	423	522	402	448	653	466	393	533	335	564	445	353	426	363	334	367	187	244	234
ENSG00000077684.16	876	778	833	990	843	851	1345	1138	885	1344	913	1417	1275	944	1205	1068	1172	1156	665	807	878
ENSG00000077713.19	343	341	345	499	403	418	604	452	395	486	385	571	580	430	484	568	642	630	467	554	542
ENSG00000077721.16	1066	945	1095	1480	1103	1172	2108	1486	1251	1506	1132	1893	1639	1302	1536	1861	2025	2138	1657	2335	2028
ENSG00000077782.20	341	318	298	351	309	306	482	406	267	515	393	513	568	530	487	761	748	672	965	1221	1032
ENSG00000077800.13	1	4	3	0	0	1	1	4	2	0	3	0	1	0	0	0	0	0	2	4	1
ENSG00000077935.17	0	0	0	0	0	0	0	0	0	0	0	0	1	0	0	0	0	0	0	0	0
ENSG00000077942.19	1226	1111	1197	1295	1168	1259	1604	1470	1135	1686	1143	1904	1587	1166	1563	1519	1609	1829	1183	1571	1470
ENSG00000077943.8	13	8	4	14	8	18	20	21	10	21	10	12	6	8	13	10	13	12	10	17	8
ENSG00000077984.6	0	0	0	0	0	0	0	0	0	0	0	0	0	0	0	0	0	0	0	0	0
ENSG00000078018.19	210	164	240	223	196	221	362	271	240	380	265	442	717	562	578	1285	1418	1178	2442	3244	2771
ENSG00000078043.16	247	237	258	340	253	299	469	298	262	374	267	419	390	294	315	371	425	417	341	435	442
ENSG00000078053.17	0	0	0	1	0	0	4	0	0	0	0	0	0	2	1	1	0	1	1	0	1
ENSG00000078061.13	1585	1509	1482	2037	1573	1506	2421	2041	1729	2026	1516	2173	1985	1584	2030	2020	2224	2224	1810	2387	1937
ENSG00000078070.13	728	693	774	898	815	907	1173	976	668	1003	700	1110	1002	856	956	961	992	970	702	867	855
ENSG00000078081.8	17	26	8	20	9	8	25	17	14	28	19	17	41	27	30	69	61	58	203	376	220
ENSG00000078098.14	1	1	0	10	2	3	8	2	2	3	4	2	2	2	2	3	1	0	1	0	2
ENSG00000078114.18	403	378	421	472	384	422	786	503	402	653	433	731	889	687	678	986	1173	1043	1027	1397	1182
ENSG00000078124.12	525	537	571	769	529	615	1104	746	612	896	679	1069	1117	824	787	1074	1250	1099	1107	1547	1333
ENSG00000078140.14	2050	2084	2336	2927	2175	2458	4254	2848	2462	3164	2239	3769	3320	2689	2894	3531	3852	3555	3042	3983	3658
ENSG00000078142.13	481	498	540	669	574	585	847	660	535	768	556	860	761	570	634	718	823	754	725	808	757
ENSG00000078177.14	872	874	1081	1270	929	1045	1855	1147	1048	1526	1026	1846	1350	1128	1152	1164	1381	1202	989	1299	1255
ENSG00000078237.7	496	426.32	488.87	656.77	478	522	963	661	515.13	637.53	507.61	930	830	621.14	697	641.32	774.14	764.37	623.73	815.38	719.29
ENSG00000078246.17	496	452	436	544	479	482	745	552	416	716	503	746	665	568	697	852	895	850	988	1325	1070
ENSG00000078269.15	1183	1111	1179	1338	1234	1178	1782	1357	1026	1918	1309	2064	2293	1974	1825	2137	2449	2303	1881	2417	2294
ENSG00000078295.17	0	0	0	0	2	0	4	2	0	1	1	1	2	1	0	3	2	2	1	5	6
ENSG00000078304.19	1397.58	1439.71	1627.9	2009.73	1597.89	1599.41	2686.82	1945.84	1585.53	2021.65	1458	2516.73	1873.56	1518.85	1746.83	1732.66	2035.61	1882.93	1371.8	1711.86	1617.94
ENSG00000078319.9	97	63.9	78.63	88.8	69	81	118.7	108	63	76.93	77	99.77	88	73.77	85	93.57	88.23	113	75.95	117.81	98
ENSG00000078328.21	0	1	0	1	0	1	2	0	2	1	0	3	5	2	2	6	0	2	2	1	2
ENSG00000078369.18	6204	5700	6183	7409	6420	6440	9837	8245	6213	9100	6506	10954	10215	8077	9300	11404	11815	11735	11185	14491	13274
ENSG00000078399.18	0	0	0	0	0	0	0	0	0	0	0	0	0	0	0	1	0	0	0	0	0
ENSG00000078401.7	47	28	53	56	37	44	71	53	58	65	28	79	57	30	36	39	37	48	14	19	25
ENSG00000078403.17	730	822	809	975	863	844	1442	936	827	1254	851	1322	1213	956	1085	1111	1297	1280	886	1142	1038
ENSG00000078487.17	30	36	28	45	36	41	45	47	34	35	40	52	58	43	62	44	62	36	38	51	68
ENSG00000078549.14	0	0	2	0	0	0	1	0	0	0	0	0	0	0	1	1	0	0	2	5	1
ENSG00000078579.9	0	0	0	1	2	0	0	0	0	0	0	2	0	0	0	0	1	0	1	2	1
ENSG00000078589.13	0	0	0	0	0	0	0	0	0	0	0	0	0	0	0	0	0	0	0	0	0
ENSG00000078596.11	6	5	5	12	12	13	17	4	5	14	14	13	4	11	7	1	4	15	7	5	6
ENSG00000078618.21	3722	3770	4196	5033	4273	4611	6663	4997	3833	5391	3819	6365	5318	4101	4697	4726	5104	4980	3702	4525	4312
ENSG00000078668.14	1740	1737	2024	2629	2007	2113	3226	2646	2052	2368	1792	3025	2665	2114	2513	2675	2831	3149	2235	2902	2765
ENSG00000078674.17	2035	1963	2089	2237	2227	2460	3020	2351	1752	3351	2261	3646	3298	2714	2620	2860	3054	3052	2312	2987	2977
ENSG00000078687.17	461	467	490	487	449	515	677	490	433	673	459	719	628	584	538	640	709	667	635	780	720
ENSG00000078699.21	581	570	644	782	634	714	1047	670	636	870	573	1002	836	775	717	804	942	820	625	874	778
ENSG00000078725.13	21	14	14	18	16	16	19	16	17	15	12	32	15	13	19	6	13	15	3	7	10
ENSG00000078747.15	1468.81	1505	1742.91	2130.26	1547.77	1879.2	2925.46	1870.89	1649.18	2260.23	1658.29	2787.84	2450.56	2049.09	2020	2391.37	2779.97	2565.32	2269.32	2945.24	2651.22
ENSG00000078795.16	0	0	0	0	0	0	2	0	0	0	1	0	0	0	0	0	0	2	1	1	0
ENSG00000078804.13	1580	1842	1830	2082	1906	1812	2813	2024	1758	2155	1613	2533	1993	1771	2047	2551	2598	2309	3307	4483	3782
ENSG00000078808.17	4558	4510	4303	5345	4713	4919	6714	6058	4374	5874	4734	6735	5863	4835	5905	5646	5541	5844	3927	5404	4717
ENSG00000078814.15	8	8	9	6	11	5	13	10	8	10	9	8	12	4	7	7	9	14	5	8	1
ENSG00000078898.7	9	8	3	16	10	8	16	16	10	5	6	9	8	9	7	6	11	10	1	9	1
ENSG00000078900.15	0	0	0	6	0	0	1	2	1	0	1	0	1	0	3	0	0	0	0	0	0
ENSG00000078902.16	2484	2496	2507	3197	2565	2672	4112	3459	2778	3235	2543	3663	3240	2630	3238	3400	3520	3451	2654	3845	3210
ENSG00000078967.13	429	412	446	563	464	428	749	620	490	571	398	654	570	468	576	644	672	627	542	665	594
ENSG00000079101.16	33	48	46	48	42	46	69	41	33	53	31	56	33	23	48	32	30	51	19	29	11
ENSG00000079102.16	8	6	6	3	9	1	9	5	4	5	5	5	7	9	8	6	7	14	7	8	6
ENSG00000079112.10	8	7	7	13	4	11	18	15	15	14	4	22	10	10	17	18	16	10	12	21	10
ENSG00000079134.12	541	470	567	648	602	573	850	641	502	799	544	858	856	616	696	763	774	764	653	746	731
ENSG00000079150.18	131	99	125	165	114	135	242	162	170	165	118	214	139	126	175	151	154	157	65	103	99
ENSG00000079156.17	224	239	277	303	256	304	433	299	254	365	265	424	366	311	287	329	380	300	224	264	249
ENSG00000079215.14	132	145	137	193	162	146	237	184	160	184	126	214	177	113	141	91	104	123	56	52	36
ENSG00000079246.16	3740	3325	3901	4478	4004	4298	5540	5100	3552	5364	3893	6478	5700	4422	5178	5833	6024	6299	5457	7071	6471
ENSG00000079257.8	60	53	72	85	77	72	113	85	53	67	52	98	86	71	81	87	94	98	59	91	71
ENSG00000079263.19	6.12	10.09	7.15	5.03	10.31	13.21	5.12	5.14	3.83	10.91	7.33	18.09	6.5	4.05	10.2	5.1	7.77	15.11	14.59	34.82	33.14
ENSG00000079277.21	1035	1047	1054	1186	1098	1203	1784	1194	1032	1570	1018	1615	1471	1269	1291	1508	1525	1459	1217	1505	1377
ENSG00000079308.19	752	833	766	837	809	814	1109	812	697	1031	695	962	729	637	659	559	650	572	819	1265	916
ENSG00000079313.15	772	752	674	783	786	780	1072	825	630	1143	895	1148	1242	1061	1083	1403	1388	1325	1317	1866	1613
ENSG00000079332.15	1924	1977	2263	2996	2211	2333	3870	2929	2481	3110	2022	3464	2836	2188	2616	2782	2941	2969	2417	3230	2868
ENSG00000079335.20	145	135	155	208	156	158	285	195	167	255	160	318	254	169	210	251	269	249	266	320	233
ENSG00000079337.16	9	8	9	6	5	4	10	12	6	6	14	3	9	3	9	17	16	25	21	39	19
ENSG00000079385.22	962	827	941	1094	972	993	1482	1232	1074	1453	1014	1725	1760	1398	1567	2245	2412	2133	2296	3064	2822
ENSG00000079387.14	302	262	330	438	284	362	617	393	311	489	330	639	475	400	436	542	515	525	416	485	479
ENSG00000079393.20	21	20	16	36	30	13	29	36	13	45	26	42	61	53	77	159	139	112	193	269	232
ENSG00000079432.7	2405	2531	2295	2567	2443	2250	3486	2831	2214	3743	2630	3688	3627	3124	3312	3608	3889	3733	3022	3997	3554
ENSG00000079435.10	40	48	28	41	35	44	54	38	41	61	44	55	62	50	61	66	78	74	54	110	91
ENSG00000079459.13	9330	10169	10719	13014	11666	12575	16296	14241	10839	12810	9485	15502	12938	10371	12263	13366	13853	13970	10764	13470	12370
ENSG00000079462.7	296	263	212	314	257	213	385	360	320	356	262	421	380	289	422	546	511	592	413	562	481
ENSG00000079482.13	122	115	144	170	113	127	260	137	146	173	132	218	205	134	159	230	239	225	152	194	180
ENSG00000079557.5	1574	1788	1834	2484	2174	2317	2968	2514	1995	2150	1551	2716	1435	1133	1536	1100	1137	1240	496	607	611
ENSG00000079616.12	198	175	167	259	160	174	302	220	199	288	174	317	227	198	237	223	200	259	130	183	166
ENSG00000079689.14	74	76	89	117	97	74	165	100	90	86	61	95	90	80	107	94	100	74	80	109	91
ENSG00000079691.18	378	287	312	349	298	296	428	386	303	465	319	564	515	413	432	498	551	534	458	623	539
ENSG00000079739.17	1417	1391	1509	1942	1516	1610	2626	1966	1579	2026	1470	2481	2039	1610	1967	1889	2032	2173	1228	1542	1495
ENSG00000079785.15	1432	1377	1578	1840	1625	1784	2243	1982	1484	2186	1552	2539	2379	1861	2067	2302	2369	2531	1879	2484	2305
ENSG00000079805.16	3616	3724	3396	3902	3689	3793	4818	4259	3178	5003	3738	5395	5121	4239	4882	5036	5117	5125	3995	4803	4634
ENSG00000079819.19	353	268	316	315	302	293	434	370	297	551	307	526	489	410	425	502	524	568	622	814	810
ENSG00000079841.18	2	0	0	2	0	0	0	0	1	1	1	2	3	0	0	0	3	0	1	4	3
ENSG00000079931.15	11	19	8	24	19	11	21	21	12	21	16	22	17	12	31	25	24	30	23	34	30
ENSG00000079950.14	1368	1141	1360	1694	1372	1465	2333	1694	1461	2139	1397	2561	2311	1780	1985	2469	2804	2658	2246	3023	2951
ENSG00000079974.17	341.85	353.96	319.15	398.25	371.26	364.47	616.14	394.55	333.32	583.21	349.13	477.47	536.66	482.75	450.47	553.84	560.48	537.72	422.5	503.56	450.06
ENSG00000079999.14	1547	1390	1280	1647	1462	1486	2110	1995	1431	2132	1659	2381	2605	2097	2580	3082	2958	3267	2915	4023	3463
ENSG00000080007.8	0	0	0	0	0	0	0	0	0	0	0	0	0	0	0	0	0	0	0	0	0
ENSG00000080031.10	282	257	264	247	276	288	358	352	236	458	253	453	516	378	394	644	759	663	1218	1710	1208
ENSG00000080166.16	10	8	3	8	10	3	12	7	4	6	5	10	4	1	1	10	1	1	1	6	3
ENSG00000080189.15	996	931	966	1198	984	942	1719	1355	1059	1269	937	1516	1292	1096	1231	1333	1450	1436	1129	1564	1311
ENSG00000080200.10	190	191	218	262	233	228	400	243	217	311	233	392	348	304	239	255	352	315	272	393	367
ENSG00000080224.17	34	18	14	29	24	15	31	30	23	45	18	38	22	21	28	33	33	40	22	28	23
ENSG00000080293.9	2	0	4	0	1	3	1	0	1	0	4	1	1	0	4	1	3	3	1	0	0
ENSG00000080298.15	179	174	211	277	213	228	352	253	208	351	220	352	293	221	275	301	337	280	262	350	316
ENSG00000080345.18	786	723	904	1023	825	929	1414	973	850	1369	869	1546	1464	1233	1121	1327	1646	1382	1500	1907	1755
ENSG00000080371.6	1156	1194	1254	1593	1271	1306	2391	1656	1410	1751	1305	2285	1864	1514	1625	1900	2170	1990	2057	2533	2369
ENSG00000080493.17	103	72	92	137	95	94	189	123	115	167	109	228	217	171	191	258	334	330	251	306	346
ENSG00000080503.24	1316	1319	1299	1453	1382	1459	1879	1635	1115	1881	1462	2150	1953	1608	1611	1645	1839	1818	1045	1349	1401
ENSG00000080511.5	0	0	0	0	0	0	0	0	0	0	0	0	0	0	0	0	0	0	0	0	1
ENSG00000080546.13	1075	1132	1188	1486	1178	1300	1925	1430	1234	1489	969	1785	1368	935	1222	926	1089	1142	472	525	574
ENSG00000080561.13	162	142	150	187	159	163	209	183	135	237	153	254	271	193	228	260	313	250	305	398	335
ENSG00000080572.12	0	0	0	0	0	0	0	0	0	0	1	0	0	0	1	0	0	0	0	0	4
ENSG00000080573.7	17	19	17	18	24	25	37	37	10	25	21	26	31	40	39	40	12	15	10	9	16
ENSG00000080603.17	1148.82	1238.07	1281.21	1358.14	1284.29	1274.42	1959.35	1265.64	1007.19	2067.27	1485.77	1968.06	1983.99	2009.28	1807.75	2000.95	2248.19	1989.39	1719.11	2318.89	2265.84
ENSG00000080608.10	345	302	308	422	375	335	481	451	289	519	342	579	628	496	555	817	865	875	1003	1318	1234
ENSG00000080618.16	4171	4315	5132	6535	5013	5603	8006	6598	5247	5539	4033	7321	5227	3856	5212	4407	4525	4997	1838	2052	2327
ENSG00000080644.16	0	1	0	0	0	0	2	0	0	0	0	3	0	0	0	0	0	0	1	3	0
ENSG00000080709.15	5	7	5	4	6	2	8	4	3	7	4	6	5	10	13	8	6	8	4	6	2
ENSG00000080802.18	538	515	592	748	642	639	997	808	595	891	635	999	916	730	804	918	1063	939	828	1029	941
ENSG00000080815.19	2001	1890	2389	2882	2050	2394	4029	2820	2383	2980	2177	3673	3279	2715	2959	3597	4175	3770	3578	4775	4233
ENSG00000080819.9	368	326	398	517	428	384	763	502	408	553	416	632	623	428	475	504	658	550	343	535	425
ENSG00000080822.17	825	755	934	1234	885	890	1658	1196	1023	1187	849	1415	1333	1042	1150	1544	1709	1567	1905	2684	2142
ENSG00000080823.23	85	64	69	84	73	92	130	84	69	89	61	101	78	77	73	53	63	51	29	23	26
ENSG00000080824.18	20746.5	18572.6	21121.7	25399.5	22438.4	23794	33318	28959.1	20579.3	34065.6	24026.4	38911.9	45947.8	39272.2	39542.6	64059.5	66544.8	62036.5	77554.5	105330	88357.4
ENSG00000080839.12	54	67	73	90	85	65	140	97	76	116	71	129	91	88	57	69	83	99	65	81	95
ENSG00000080845.17	2506	2080	2168	2539	2230	2191	3315	2940	2255	3675	2528	3974	4428	3625	3955	5647	5718	5401	6725	9021	7638
ENSG00000080854.15	20	15	15	17	10	12	19	20	16	36	15	32	26	24	25	35	35	22	32	47	36
ENSG00000080910.13	61.02	87.13	100.15	121.1	109.37	114.19	185.48	130.29	115.1	85.46	67.79	140.29	41.43	41.72	88.6	62.15	55.38	72.7	21.32	33.94	43.1
ENSG00000080947.15	72.14	70.34	63	94.11	66.1	92	123.13	59	48	100.27	81.7	96.44	107.13	118.35	70.31	65.08	77.1	67.17	47.11	56.07	71.14
ENSG00000080986.13	31	22	19	22	14	15	36	44	16	39	24	27	27	10	22	12	24	27	12	24	20
ENSG00000081014.11	361	331	389	459	345	402	644	472	375	533	382	645	579	388	447	469	534	500	361	476	458
ENSG00000081019.13	312	288	347	470	366	372	643	360	362	496	306	591	470	417	470	462	544	497	415	569	530
ENSG00000081026.19	542	604	589	656	594	664	752	694	489	820	565	870	802	668	679	636	747	734	566	745	681
ENSG00000081041.9	430	292	361	450	356.84	333	613.59	558.23	422	508	334	556	358	252	388	285	310.93	360	197	305	280
ENSG00000081051.8	874175	836894	896036	1090730	977172	1025430	1320160	1186590	866628	1125820	836474	1392510	1023600	778343	976029	880365	916398	1029230	578631	730563	704799
ENSG00000081052.12	4	3	5	0	0	2	7	4	4	3	5	10	4	1	1	2	1	3	0	1	2
ENSG00000081059.20	134	116	99	93	135	138	138	153	103	141	119	179	183	149	150	229	247	226	309	407	355
ENSG00000081087.15	297	252	333	403	271	298	527	399	338	478	315	575	513	377	442	641	769	663	864	1213	1017
ENSG00000081138.14	5	0	2	4	5	6	3	2	4	0	3	8	2	3	1	5	8	6	39	39	13
ENSG00000081148.12	57	58	65	82	47	79	129	60	84	87	56	77	68	47	54	63	73	49	34	29	35
ENSG00000081154.12	1698.99	1586	1979	2329.96	1980.97	1989.97	3455.99	2647	1929.92	2573.98	1806	3261.99	2831.96	2068.99	2456.99	2698	2860.94	2930.95	2489.99	3182.99	2865.99
ENSG00000081177.18	567	542	631	740	610	605	1010	720	633	776	564	1032	907	710	831	915	968	939	630	828	690
ENSG00000081181.8	210	152	190	282	151	181	372	249	259	247	232	373	389	307	378	728	673	689	1774	2863	2044
ENSG00000081189.15	15	8	23	15.13	26	10	40	25	15	18	20	22	21	8	19	10	15	19	6	16	22
ENSG00000081237.20	0	0	0	2	1	0	1	0	0	0	0	0	2	0	0	0	1	0	1	0	0
ENSG00000081248.11	1	2	1	0	0	0	3	0	2	1	4	3	1	0	0	1	0	0	1	7	10
ENSG00000081277.12	0	0	0	0	0	0	0	0	1	0	0	0	0	0	0	0	0	0	0	0	0
ENSG00000081307.12	1153	1065	1098	1547	1253	1295	1952	1430	1216	1497	1121	1806	1613	1231	1389	1280	1381	1454	927	1235	1078
ENSG00000081320.11	103	80	118	122	112	102	207	160	126	159	114	176	194	162	154	166	240	243	224	242	270
ENSG00000081377.17	685.99	659.98	759	984.97	759.96	827.99	1327.99	878	758	1068.99	715.97	1230.96	1208.96	936	1057.97	1254.99	1310.89	1133.97	837.99	1047.98	1043.97
ENSG00000081386.12	303	308	306	396	346	379	519	362	289	461	328	501	418	334	339	301	370	352	235	256	325
ENSG00000081479.15	28	30	49	47	49	48	80	53	46	67	54	82	52	53	61	42	53	61	22	24	27
ENSG00000081665.14	0	0	0	0	0	0	0	0	0	0	0	0	0	0	0	0	0	0	0	0	0
ENSG00000081692.12	461	436	390	532	419	433	630	580	456	570	449	664	681	529	701	822	876	863	680	924	826
ENSG00000081721.12	281	230	253	311	283	259	469	362	274	345	281	450	380	324	363	496	474	500	334	504	449
ENSG00000081760.17	773	794	842	1055	812	826	1239	985	805	1078	793	1204	1085	948	987	1190	1269	1192	1147	1607	1506
ENSG00000081791.9	1179	1195	1221	1547	1258	1323	2024	1595	1286	1613	1207	1812	1689	1291	1444	1491	1688	1615	1235	1648	1408
ENSG00000081800.9	0	0	0	0	0	0	0	0	1	0	0	0	0	0	0	0	0	0	0	0	0
ENSG00000081803.16	642	560	581	777	640	709	926	733	611	794	570	1062	742	566	695	662	718	745	458	493	479
ENSG00000081818.4	22.06	12	16.06	24.06	21.28	18.06	39.91	18	17.05	27.06	16.1	21.04	16.02	28.14	18.04	16.72	23.83	21.58	14.03	23.07	22.04
ENSG00000081842.18	6	1.77	9.47	5	6.41	4.19	4.42	6.88	1.76	5.39	7.32	10.64	8	17.37	9.43	13.02	35.2	13.11	3.01	8	11.69
ENSG00000081853.15	0	0	0	0	0	0	0	0	0	2	0	1.51	0	0	0	0	2	0	0	0	0
ENSG00000081870.11	284	247	300	419	317	310	526	380	287	342	232	458	366	267	328	336	376	449	266	362	377
ENSG00000081913.14	561	664	608	778	659	645	1016	735	663	945	589	999	726	618	713	550	653	609	405	551	459
ENSG00000081923.14	720	680	776	971	727	870	1248	928	815	1149	835	1310	1190	1002	997	1142	1181	1179	1016	1394	1202
ENSG00000081985.11	0	1	0	4	0	1	0	0	1	3	1	5	2	0	4	0	1	0	2	1	4
ENSG00000082014.16	507	409	382	465	457	442	570	527	400	588	375	590	588	410	457	495	538	616	399	517	448
ENSG00000082068.9	369.14	378	432	506	471.18	446	600	523	369.62	574	466	712	607.43	480.62	575.43	591	593	657.66	425	581.66	597.67
ENSG00000082074.18	0	0	0	0	0	0	0	0	0	0	0	0	0	0	0	1	0	0	1	0	0
ENSG00000082126.18	1	3	3	6	2	1	5	5	2	5	6	3	1	4	4	6	3	5	0	1	7
ENSG00000082146.13	1703.06	1660.44	1970.73	2493.02	1942.4	1992.26	3389.06	2483.01	1980.57	2216.03	1722.1	2816.98	2158.35	1652.11	2114.3	2037.52	2169.07	2240.67	1284.86	1678.44	1638.25
ENSG00000082153.18	4549.55	4211.38	5077.29	6628.71	4943.92	5469.84	8803.67	6289.06	5315.83	6334.03	4700.01	8177.03	6703.22	5124.41	5589.04	6681.07	7362.45	7337.39	6957.23	9460.75	8302.68
ENSG00000082175.15	1	0	0	1	0	0	0	1	0	0	0	0	1	0	0	0	0	0	2	0	0
ENSG00000082196.20	76.42	81.79	86.16	108.93	81.11	83.75	150.49	81.64	97.61	133	84.26	119	115	100	110.03	87.01	123.02	115	74.93	68	81.63
ENSG00000082212.13	1190	1249	1357	1715	1433	1554	2238	1626	1307	1546	1169	2065	1688	1210	1348	1433	1529	1630	1342	1644	1397
ENSG00000082213.18	513	484	604	687	553	572	963	714	577	800	545	958	738	639	634	776	812	761	612	729	711
ENSG00000082258.13	1012	1061	1176	1416	1191	1241	2075	1465	1141	1841	1165	2055	1764	1348	1442	1700	2099	1764	1666	2044	1904
ENSG00000082269.16	429	402	447	561	394	492	731	545	436	678	490	861	717	566	609	730	803	762	893	1272	1045
ENSG00000082293.13	1	5	9	4	0	3	1	5	3	6	0	8	4	9	1	7	10	6	1	1	2
ENSG00000082397.17	905	886	916	949	944	1044	1239	1160	769	1331	921	1475	1646	1410	1383	1764	1939	1818	1882	2454	2197
ENSG00000082438.17	1495	1475	1558	1922	1618	1753	2299	1843	1562	2127	1478	2474	1783	1238	1423	1271	1522	1487	1175	1609	1292
ENSG00000082458.12	629	652	609	685	680	701	982	759	604	893	634	952	974	700	896	980	1081	1023	886	1204	999
ENSG00000082482.13	0	0	0	0	0	0	0	0	0	0	0	0	1	1	0	1	1	0	0	0	0
ENSG00000082497.12	1	0	0	0	0	2	1	0	0	0	1	0	0	0	0	0	0	0	1	0	0
ENSG00000082512.15	39	38	36	33	40	34	83	44	37	74	34	68	91	82	77	142	131	95	159	226	156
ENSG00000082515.18	692	580	655	888	691	767	979	912	685	697	535	1018	810	572	847	879	916	1011	638	803	815
ENSG00000082516.9	402	437	479	533	447	496	692	529	463	761	531	779	768	552	624	791	800	861	575	798	752
ENSG00000082556.12	607	626	604	917	675	665	1156	854	733	830	613	1056	908	701	763	742	848	785	470	641	632
ENSG00000082641.16	6436	7115	6825	7330	7145	7467	9512	7966	5972	9863	6933	10296	9474	7545	8138	8259	8571	8732	7692	10406	8987
ENSG00000082684.16	4	6	4	3	10	4	4	5	3	8	9	5	12	13	8	7	8	6	3	1	3
ENSG00000082701.15	1785	1587	1854	2106	1617	1759	3165	2151	1951	2565	1820	2988	2515	2151	2101	2432	2746	2407	2147	2949	2739
ENSG00000082781.12	2070	2044	1816	2399	2099	2181	3077	2755	1993	3007	2150	3360	3074	2438	2918	3317	3554	3532	3232	4445	3817
ENSG00000082805.20	895	912	921	1050	875	1029	1402	1088	786	1446	1027	1518	1392	1212	1189	1332	1473	1274	1286	1600	1479
ENSG00000082898.17	2520	2511	2797	3509	2658	2807	4799	3185	2820	4168	2692	4476	4416	3530	3591	4261	5151	4500	4355	5467	4947
ENSG00000082929.8	0	0	0	0	2	0	0	0	1	0	0	0	0	0	1	0	0	0	0	0	0
ENSG00000082996.19	723	710	886	996	838	883	1440	966	835	1075	795	1277	991	807	951	1010	1135	1095	845	1082	976
ENSG00000083067.22	16	9	18	31	24	13	31	35	21	24	12	30	25	24	34	20	24	32	6	5	9
ENSG00000083093.9	221	203	205	256	211	277	364	264	202	300	216	343	364	290	308	348	347	340	271	324	296
ENSG00000083097.14	564	540	564	793	571	633	1106	665	699	899	591	1041	894	724	758	699	839	760	492	623	642
ENSG00000083099.11	668	639	692	910	789	745	1149.96	880	661	996	681	1252	965	834	905	1017	1104	1078	885	1090	1030
ENSG00000083123.15	496	578	646	844	602	672	1036	800	632	664	478	883	605	440	525	410	496	572	243	310	274
ENSG00000083168.11	967	910	909	955	923	979	1247	1011	733	1486	989	1465	1417	1179	1073	1333	1443	1345	1308	1789	1594
ENSG00000083223.18	671	635	658	761	722	769	946	807	649	1125	686	1256	1027	931	881	1083	1084	1115	1024	1441	1313
ENSG00000083290.20	639	580	648	817	707	739	1116	785	646	897	658	993	968	826	785	989	1115	995	716	1009	821
ENSG00000083307.12	49	41	25	37	27	29	44	39	31	43	46	61	61	56	47	93	120	91	134	170	156
ENSG00000083312.17	2950	2700	3251	4245	3015	3367	5603	4090	3629	4891	3289	5866	5093	4022	4149	4997	6140	5529	5180	6788	6034
ENSG00000083444.17	3853	3795	3888	4731	4012	4164	6191	5087	3939	5096	3954	5796	4976	4006	4865	4969	5153	5405	3678	4743	4324
ENSG00000083454.22	17.1	13.3	21.62	35.85	21.78	27.76	33.82	24.5	23.23	23.2	16.01	29.49	31.25	24.4	12.75	34.13	12.73	24.28	11	7.55	22.42
ENSG00000083457.12	256	281	255	356	304	300	472	331	294	297	269	381	337	273	287	306	325	375	207	282	302
ENSG00000083520.15	797	859	900	1112	996	947	1462	1239	902	1263	887	1538	1301	1005	1091	1273	1327	1355	1179	1559	1381
ENSG00000083535.16	209	231	266	284	274	280	372	279	211	320	226	441	365	292	300	323	358	348	302	378	307
ENSG00000083544.14	278	251	281	318	297	305	385	351	254	425	271	432	430	338	396	405	434	391	312	401	360
ENSG00000083622.8	0	0	0	0	0	0	0	0	0	0	0	0	0	0	0	0	0	0	0	0	0
ENSG00000083635.8	171	183.89	156	217	154.98	164.96	271.96	225	182.94	251	168	269.99	278.97	236.98	295.92	300	348	304.99	284.94	355.99	368.98
ENSG00000083642.19	637	655	641	815	642	796	1065	828	616	1126	662	1131	1051	868	879	921	943	941	752	873	885
ENSG00000083720.13	63	50	84	72	49	63	94	70	63	110	60	97	117	65	94	86	101	76	110	150	140
ENSG00000083750.12	210	244	219	267	239	289	387	313	226	332	217	348	316	224	311	325	342	286	265	309	281
ENSG00000083782.8	0	0	0	0	0	0	0	0	0	0	0	0	0	0	0	0	0	0	0	0	0
ENSG00000083799.17	811	740	866	969	798	831	1397	963	876	1155	818	1315	949	796	840	816	1015	933	845	1089	1062
ENSG00000083807.10	207	211	195	262	209	215	359	290	219	217	190	309	200	171	187	210	202	247	108	152	138
ENSG00000083812.12	138.39	127.06	150.52	194.51	183.44	182.97	212.66	189.06	131.27	235.93	137.09	244.66	203.44	215.06	224.69	221.22	259.84	233.52	223.16	268.36	221.25
ENSG00000083814.13	188	146	184	239	174	192	271	207	180	234	167	232	209	137	192	165	175	186	86	117	124
ENSG00000083817.9	136	129	93	158	125	108	206	173	143	158	114	208	186	131	137	152	178	190	140	178	140
ENSG00000083828.16	88.14	81	77.3	118	82	96.15	128.27	127.31	83.36	128.05	73	143.03	143	120.03	103.06	127	155.06	136.62	137	156.04	151
ENSG00000083838.16	123.2	157.9	122.97	138.27	110.64	97.77	147.74	144.54	129.14	168.76	130.69	174.61	179.01	113.47	152.91	178.51	168.02	163.28	103.97	154.11	122.52
ENSG00000083844.10	345	289	381	433	363	382	717	404	364	594	392	656	648	581	388	481	591	472	436	554	521
ENSG00000083845.9	5356	5170	5341	6937	5485.93	5707	8170.99	7660	5826.96	5967	4647	7605	6437.92	4916	7059	7567	7478	8724	6264	9092	7871
ENSG00000083857.14	4818	4186	4664	5631	4361	4848	7547	5265	4913	7724	5131	8904	8242	7067	6692	8352	9934	8835	7850	10134	9710
ENSG00000083896.12	1316	1339	1347	1635	1459	1438	2101	1678	1241	1957	1427	2213	2062	1651	1680	1905	1975	1923	1723	2450	2243
ENSG00000083937.9	754	712	750	965	762	884	1309	1017	787	1082	785	1368	1163	891	1139	1283	1326	1360	1448	1942	1669
ENSG00000084070.12	858	986	983	1073	1034	985	1472	1255	940	1282	914	1348	1160	860	1067	969	1025	985	574	807	732
ENSG00000084072.16	627	619.41	682	754	691	697	981.6	859.17	701	844	662	979	897	662	846	872	890	950	659.95	856	804
ENSG00000084073.9	1047	1011	1243	1674	1153	1213	2258	1589	1339	1643	1225	2070	1785	1290	1499	1733	1951	1873	1481	1987	1777
ENSG00000084090.13	2391	2355	2776	3510	2645	2837	4924	3329	2866	3372	2613	4376	3580	2974	3283	3371	3598	3682	2855	3485	3304
ENSG00000084092.7	498	488	524	621	510	603	743	661	472	628	500	860	804	566	738	797	828	788	565	797	652
ENSG00000084093.17	861	860	1040	1131	889	916	1573	1035	879	1357	918	1636	1378	1110	1101	1180	1393	1246	1010	1367	1230
ENSG00000084110.11	13	5	8	15	6	15	12	19	10	12	10	12	20	10	18	12	11	8	13	28	36
ENSG00000084112.15	1355	1329	1426	1529	1217	1464	2094	1623	1295	2152	1435	2429	2232	1825	1798	2244	2599	2427	3315	4374	3932
ENSG00000084207.17	7554	7041	7482	10347	8071	7922	12808	11395	8781	9343	7567	10892	11217	8514	11680	12948	12718	14588	9137	12494	11113
ENSG00000084234.17	11649	11482	11665	13289	12350	12827	17059	14605	10654	16680	12327	18557	16327	13174	14678	15424	15459	16134	12758	17462	15361
ENSG00000084444.14	83	87	111	145	97	98	199	131	81	133	95	158	119	106	109	120	115	135	94	141	80
ENSG00000084453.16	7	12	6	9	18	23	12	9	21	9	10	18	13	12	16	16	11	6	6	7	3
ENSG00000084463.8	1225	1147	1213	1494	1277	1358	1825	1639	1206	1799	1324	2045	1895	1292	1614	1724	1795	1857	1428	1818	1707
ENSG00000084623.11	2326	2080	2324	3033	2322	2461	3687	3127	2552	2883	2179	3422	2924	2336	3022	3363	3519	3758	2982	4074	3779
ENSG00000084628.10	15	12	14	16	15	22	26	26	23	27	25	36	72	57	75	143	118	141	147	196	171
ENSG00000084636.18	15	22	15	22	26	19	28	19	24	22	26	23	34	48	52	78	74	64	67	86	99
ENSG00000084652.16	2307	2595	2289	2735	2442	2542	3555	2870	2133	3347	2387	3674	3309	2707	2932	3227	3276	3249	2872	3706	3411
ENSG00000084674.14	155366	178039	198353	236401	193860	223274	311623	212874	181537	263646	186966	306868	236576	203810	195117	184251	213848	194914	113188	134251	137336
ENSG00000084676.15	720	788	785	904	793	838	1215	907	693	1210	766	1333	1190	957	1017	1130	1213	1160	986	1299	1111
ENSG00000084693.16	411	355	373	479	385	351	620	460	385	436	373	520	486	360	424	393	381	507	246	313	304
ENSG00000084710.14	19	14	29	21	24	30	24	36	28	43	32	46	71	47	28	56	81	68	68	92	71
ENSG00000084731.15	239	197	231	246	233	172	327	286	225	367	283	400	448	374	361	614	637	622	859	1171	1045
ENSG00000084733.11	2067	1863	2182	2852	2081	2293	3955	3050	2346	3076	2171	3772	3546	2852	3111	4486	4910	4631	5327	6997	5803
ENSG00000084734.9	336	363	356	446	409	426	672	486	368	567	371	603	632	640	675	855	868	755	906	1331	1167
ENSG00000084754.12	3785	3998	4145	4864	4393	4628	5828	5170	3739	5546	3850	6191	5443	4519	5141	5607	5389	5740	4543	5882	5247
ENSG00000084764.12	180	206	175	201	189	184	310	251	190	311	208	344	320	262	294	375	393	395	296	409	381
ENSG00000084774.14	1060	1108	1086	1336	1092	1097	1764	1259	1062	1614	1223	1803	1732	1582	1522	1855	2131	1833	1522	1966	1883
ENSG00000085063.16	4340	3913	4501	5809.97	4330.57	4664.07	7660.37	5660.36	4815.99	5873.6	4046.55	7282.21	5733.66	4280.33	5629	6064	6701.6	7044	6296	8567	7603.67
ENSG00000085117.12	206	193	236	251	222	212	271	234	158	229	200	310	175	210	245	182	166	201	104	171	123
ENSG00000085185.15	714	771	758	838	746	822	1091	880	758	1269	847	1193	1277	1180	1058	1262	1421	1189	1077	1470	1216
ENSG00000085224.22	1476	1308	1432	1595	1453	1661	1999	1621	1252	2293	1499	2577	2142	1686	1649	1852	1909	1963	1803	2216	2258
ENSG00000085231.14	312.63	305.71	372.65	460.9	341.68	356.89	665.74	460.97	393.51	422.21	325.14	559.75	532.83	421.28	536.34	743.65	709.06	778.77	675.13	922.24	823.79
ENSG00000085265.11	0	0	0	0	0	0	0	0	0	0	0	0	0	0	0	0	0	0	0	0	0
ENSG00000085274.15	377	319	403	476	371	410	655	524	413	518	337	657	567	412	514	520	559	584	449	592	504
ENSG00000085276.19	37	15	26	29	28	31	51	28	30	55	29	51	40	40	42	55	67	45	56	89	76
ENSG00000085365.18	593	488	663	855	582	644	1207	831	671	886	640	1131	1056	815	945	1054	1229	1142	1083	1350	1250
ENSG00000085377.14	869	772	802	1123	827	946	1439	1108	835	1070	898	1329	1275	1001	1138	1269	1285	1411	860	1147	1035
ENSG00000085382.12	136	153	171	196	153	167	285	206	171	224	207	235	227	175	189	224	239	186	157	222	228
ENSG00000085415.16	613	504	583	784	628	663	1201	851	699	931	651	1094	1024	870	884	1275	1395	1282	1347	1793	1609
ENSG00000085433.15	137	142	147	173	144	156	287	193	197	198	174	285	211	180	186	222	253	238	216	296	247
ENSG00000085449.15	1150.17	1110.57	1247	1556	1162.21	1322.76	2192.52	1461.55	1351.14	1689	1243.2	2154.27	1863.61	1466	1592.64	1773	2018.29	1854.37	1354.47	1792	1631.24
ENSG00000085465.13	619	583	644	806	643	717	954	805	633	822	584	892	772	557	724	665	677	694	359	444	479
ENSG00000085491.17	604	510	655	795	620	617	1141	829	644	924	675	1176	1075	868	946	1321	1506	1336	1482	2050	1660
ENSG00000085511.20	805	850	845	949	945	947	1255	1052	749	1244	846	1397	1229	1028	1059	1035	949	1078	642	806	790
ENSG00000085514.16	18.13	19.04	7.12	18.14	13.04	28.08	14.13	15.1	15.09	24.31	11.1	18.07	19.26	16.04	24.5	22.29	32.11	11.08	19.09	12	16.06
ENSG00000085552.17	11	5	9	4	14	8	17	10	16	10	9	17	17	5	11	13	22	15	8	16	17
ENSG00000085563.14	37	27.19	32.2	32.15	33	40	41.06	50	39.25	74	39	73.13	73.23	45	40.06	117.33	133	94	391.31	697.29	493.29
ENSG00000085644.14	138	157	131	160	137	136	211	205	138	169	138	234	200	155	185	164	186	194	155	197	181
ENSG00000085662.14	1458	1107	1099	1441	1076	1163	2001	1693	1230	1691	1221	2226	1514	1082	1556	1553	1559	2054	1682	2234	2324
ENSG00000085719.13	2251	2225	2638	3366	2375	2678	4750	3112	2699	3273	2310	3905	3218	2753	3000	3463	4041	3594	2960	3719	3317
ENSG00000085721.12	893.61	811.46	996.72	1240.31	874.87	937.2	1692.76	1171.44	956.31	1404.68	997.62	1660.23	1611.89	1213.63	1331.31	1738.07	1982.95	1778.36	2046.89	2677.28	2226.98
ENSG00000085733.16	3861	3719	3772	4360	3996	4049	6037	4833	3843	5827	4060	6392	7074	6031	6303	8618	8987	8351	9913	13812	11610
ENSG00000085741.13	2	5	1	2	6	3	11	3	2	3	4	9	11	6	2	13	19	15	45	72	55
ENSG00000085760.15	724.99	778	814	935	852	951	1129	1032	692	1063	812	1253	1131	870	971	1091	1027	1114	739	953	915
ENSG00000085788.14	652	659	703	969	731	806	1344	931	745	1140	768	1222	1134	937	904	1083	1234	1145	979	1262	1083
ENSG00000085831.15	195	208	207	266	189	222	305	265	228	323	216	337	404	320	360	586	620	547	679	969	756
ENSG00000085832.17	1020	942	1100	1443	1157	1113	1931	1331	1198	1651	1167	1923	1691	1397	1482	1884	2081	1826	1733	2398	1953
ENSG00000085840.13	49	33	39	53	37	34	64	39	40	60	49	57	47	39	57	46	41	61	26	42	40
ENSG00000085871.9	1296	1296	1328	2039	1487	1717	2719	2078	1778	1589	1297	2213	1891	1401	1863	1782	1783	2134	830	1076	1094
ENSG00000085872.15	1257	1257.97	1240	1300	1267	1301	1705	1527	1142	1909	1377.97	1987.95	2125	1632	1874.89	2201.92	2282.92	2103.97	1828.98	2513	2216
ENSG00000085978.22	823	834	858	1013	895	936	1474	1099	875	1264	868	1427	1420	1133	1227	1479	1581	1561	1210	1566	1366
ENSG00000085982.13	1202	1400	1506	1754	1509	1589	2428	1795	1491	2216	1533	2315	2413	1954	1967	2177	2274	2144	1563	2059	1809
ENSG00000085998.14	1181	1179	1133	1463	1082	1153	1965	1462	1188	1580	1240	1812	1845	1400	1715	1833	2021	1993	1568	2302	1968
ENSG00000085999.13	33	20	26	23	25	13	38	29	14	48	29	32	38	24	28	27	28	41	13	27	19
ENSG00000086015.21	1101	1068	1076	1091	1144	1066	1672	1320	994	1824	1287	1736	2386	2098	2105	3211	3233	2929	3318	4518.97	3615.98
ENSG00000086061.16	3937	3346	3811	4583	3951	4200	6126	5297	3601	5560	3922	6561	6351	5141	5789	8146	8051	8314	9196	12464	10975
ENSG00000086062.12	5079	5146	5751	7128	5564	5910	9646	7011	6207	7429	5610	8969	7427	5879	6654	6888	7747	7117	5810	7548	6826
ENSG00000086065.14	818	622	747	1063	709	822	1237	994	796	973	699	1342	1033	727	973	1101	1208	1287	1059	1468	1219
ENSG00000086102.19	884	895	898	1022	1025	1008	1384	970	807	1380	910	1464	1450	1117	1288	1427	1558	1545	1308	1738	1597
ENSG00000086159.13	0	0	3	0	1	2	1	0	0	0	0	1	0	0	1	0	0	1	0	0	0
ENSG00000086189.10	339	264	311	423	340	321	560	473	343	459	328	591	592	410	510	721	793	807	662	936	836
ENSG00000086200.16	394	363	455.58	537	432	487	722	589.26	490	648	472	773.64	656.2	518	526	584	639	647	536.59	631.3	553
ENSG00000086205.18	11.08	0	4.42	7.23	4.56	8.21	2.3	4.35	4.38	1.1	1.15	13.8	6.52	6.14	3.5	0	11.55	3.44	1	2.73	0
ENSG00000086232.13	3384	3281	3604	4360	3470	3898	5983	4748	3782	4650	3593	5762	4961	4115	4655	4885	5267	5002	3423	4320	4163
ENSG00000086288.12	2	2	1	0	2	1	4	2	2	3	0	2	1	2	3	3	2	9	2	3	4
ENSG00000086289.12	506	424	449	621	443	500	887	695	581	739	574	862	1032	750	879	1016	1125	1131	515	645	741
ENSG00000086300.15	228	286	284	348	250	276	472	345	312	372	300	471	380	327	335	406	470	460	376	479	364
ENSG00000086475.15	1179	1131	1078	1373	1195	1262	1813	1539	1115	1755	1136	1812	1668	1243	1523	1611	1681	1813.99	1135	1465	1392
ENSG00000086504.17	1276.1	1262	1228	1688	1486	1298	2020	1849	1382	1546	1294	1836.11	1706	1288	1854.1	1876	1747	1980	1300.1	1762	1604
ENSG00000086506.3	0	0	0	0	0	1	1	1	0	0	0	0	1	1	1	0	1	0	0	1	2
ENSG00000086544.3	715	736	682	807	765	772	954	909	684	1131	806	1141	1105	1033	1139	1472	1404	1436	1635	2261	1826
ENSG00000086548.9	8	3	5	8	3	2	10	7	2	4	5	5	5	8	16	8	7	7	18	22	20
ENSG00000086570.12	1	6	0	2	2	2	5	0	0	3	1	2	7	1	3	4	1	1	2	2	0
ENSG00000086589.12	739	661	700	971	716	801	1282	1043	786	1010	776	1265	1211	868	1038	1185	1314	1230	1099	1508	1227
ENSG00000086598.11	7264	7075	7975	10666	8301	8704	14344	10540	8375	9909	7523	12928	10524	8071	9540	9847	10966	11380	7630	9960	9302
ENSG00000086619.14	262	273	301	415	313	355	647	400	329	391	322	507	333	271	285	287	333	266	249	344	289
ENSG00000086666.19	1198	1074	1235	1539.99	1336	1412	2110.98	1677	1453	1717.96	1083.99	2000.99	1723.99	1312	1558.99	1750	1799	1950.99	1610.99	2047.97	1903.99
ENSG00000086696.11	599	540	552	760	614	607	984	828	763	874	631	1111	971	654	973	739	811	907	362	503	533
ENSG00000086712.13	804	739	926	1088	919	962	1533	1088	828	1359	870	1522	1498	1257	1178	1594	1735	1533	1688	2173	1957
ENSG00000086717.18	6	9	4	11	2	7	12	3	7	10	7	10	17	5	5	5	8	7	3	3	4
ENSG00000086730.17	51	37	32	33	34	28	49	39	28	36	24	35	32	29	30	37	36	34	25	17	12
ENSG00000086758.16	4522	4758	4765	5336	4661	5277	7220	5109	4326	7433	5161	7806	7208	6215	6200	6802	7229	7086	6034	7803	7419
ENSG00000086827.9	305	290	369	462	328	347	621	472	388	548	358	620	474	411	440	439	462	493	482	597	471
ENSG00000086848.15	660	554.2	682.53	908	642	654.45	1211	804	722	897	633	1023	927.76	731	747.49	900	1097	958	737.14	908.08	761.16
ENSG00000086967.10	0	1	1	0	0	0	0	0	0	0	1	0	0	0	0	0	0	0	0	0	0
ENSG00000086991.13	49	30	31	35	42	37	53	63	28	38	53	74	65	46	63	52	37	51	43	72	65.63
ENSG00000087008.16	522	551	525	727	612	593	994	757	620	781	562	847	822	659	782	712	808	738	559	678	592
ENSG00000087053.18	397	399	447	577	439	493	823	635	503	715	498	874	739	540	660	855	904	833	979	1256	1168
ENSG00000087074.8	917	628	663	750	646	621	982	962	646	1277	890	1336	1454	1223	1489	2513	2481	2429	5021	7762	5393
ENSG00000087076.9	412	405	342	522	477	392	696	531	390	488	398	546	476	397	517	536	547	508	445	566	524
ENSG00000087077.14	995	818	767	1040	869	898	1250	1252	993	1229	930	1379	1446	1184	1461	1542	1600	1794	1130	1549	1429
ENSG00000087085.15	226	200	183	198	198	172	323	239	221	330	222	330	432	383	402	724	759	515	915	1357	1035
ENSG00000087086.15	184757	190329	206026	282666	214417	221887	383435	303341	226174	254402	217114	329804	356931	301180	362535	433997	432586	472266	329864	448580	401554
ENSG00000087087.20	1654	1658	1536	1893	1662	1704	2452	2084	1538	2360	1847	2510	2542	2142	2335	2604	2632	2532	2174	2866	2594
ENSG00000087088.20	2170	1911	1805	2418	1962	1965	2977	2726	2067	2673	1903	3004	2847	2234	2880	3225	3340	3484	2766	3971	3432
ENSG00000087095.13	496	384	508	621	430	545	898	505	481	665	471	807	641	472	599	569	729	673	502	759	626
ENSG00000087111.21	647	695	750	806	681	693	1133	905	729	910	664	1007	815	618	848	699	768	778	489	675	648
ENSG00000087116.16	0	3	3	2	1	1	5	4	3	0	1	4	1	0	2	0	0	3	0	0	0
ENSG00000087128.10	0	0	1	0	0	0	0	0	0	0	0	0	0	0	0	0	0	0	0	0	0
ENSG00000087152.15	1524	1386	1311	1533	1365	1459	2118	1709	1421	2049	1455	2209	2148	1685	2029	2294	2525	2406	2297	2959	2411
ENSG00000087157.19	516	460	433	629	460	479	818	578	498	710	482	706	673	530	588	629	713	717	575	721	594
ENSG00000087191.13	1500	1531	1475	1964	1657	1601	2275	2104	1554	2149	1418	2238	2017	1660	2159	2286	2308	2411	1821	2450	2294
ENSG00000087206.17	303	318	274	396	325	368	510	448	343	433	291	501	525	439	488	516	565	582	503	684	609
ENSG00000087237.12	1	0	0	1	0	0	2	1	1	3	1	2	0	0	2	0	0	1	2	2	1
ENSG00000087245.13	7	6	7	14	9	8	7	7	15	7	3	13	9	13	11	18	15	12	15	15	7
ENSG00000087250.8	0	0	0	0	0	0	0	0	0	0	0	0	0	0	0	0	0	0	0	0	0
ENSG00000087253.13	17	30	29	29	20	16	34	17	20	37	32	29	28	23	20	26	31	37	19	27	37.8
ENSG00000087258.15	11	17	6	10	12	6	15	8	3	11	11	3	6	8	6	8	5	5	4	4	12
ENSG00000087263.17	971	833	979	1199	1053	1200	1774	1389	1007	1466	1156	1860	1711	1410	1543	1808	2064	1884	1405	1927	1859
ENSG00000087266.17	2447	2882	2727	3087	2704	3017	4239	2977	2510	3843	2730	3924	3994	3318	3269	3545	3862	3318	2614	3397	2960
ENSG00000087269.16	708	765	701	807	753	823	1100	891	667	1076	818	1279	1323	1096	1195	1443	1515	1530	1434	1887	1794
ENSG00000087274.17	4597.99	4952	4990	5912	5187	5545	7669	6132	4675.99	7076	4954	7846	7072	5729	6394	6685	7196.99	7032	4886	6286	5869
ENSG00000087299.12	275	325	340	464	341	347	570	393	342	418	292	585	434	350	358	307	424	397	220	277	258
ENSG00000087301.9	459	500	549	702	558	650	852	653	506	620	492	772	554	421	451	403	460	418	227	268	245
ENSG00000087302.9	1701	1482	1685	2320	1803	1784	2778	2346	1894	2009	1581	2648	2291	1734	2144	2452	2502	2793	1835	2630	2473
ENSG00000087303.18	26	21	24	28	31	31	35	26	25	36	22	38	33	28	30	20	21	16	35	22	47
ENSG00000087338.5	402	391	424	561	416	446	747	500	474	624	395	771	536	381	429	415	493	517	318	426	385
ENSG00000087365.16	3655	3681	3511	3950	3878	3823	4928	4411	3270	5059	3716	5638	5376	4239	4951	5445	5273	5596	4365	5772	5233
ENSG00000087448.11	551	496	612	706	515	577	1035	684	521	886	578	1003	890	758	816	893	1070	939	956	1242	1105
ENSG00000087460.25	20326	20257	19611	23052	21357	21836	27578	26668	19461	25867	18982	30076	26194	19859	26069	28440	28468	29944	24119	32125	28168
ENSG00000087470.18	1407	1270	1319	1707	1414	1544	2235	1838	1360	2146	1488	2497	2157	1709	1890	2205	2349	2420	2429	3029	2839
ENSG00000087494.16	8	2	7	4	7	5	11	10	3	12	13	9	6	4	7	8	13	14	38	81	57
ENSG00000087495.17	0	0	0	2	0	0	1	0	0	0	1	0	2	0	1	0	2	0	2	1	2
ENSG00000087502.18	716	639	838	976	729	757	1266	998	774	1054	776	1272	1067	839	919	1009	1101	1176	875	1132	1122
ENSG00000087510.7	0	0	0	2	0	0	0	0	0	0	0	1	0	0	0	0	0	0	1	2	0
ENSG00000087586.17	162.93	152.97	155.95	238	164.95	196	304	226.97	172	270	182	303	277.91	189	224	228	279	300.95	158	266.94	203
ENSG00000087589.16	19	21	14	17	19	12	34	21	10	29	17	36	18	11	15	10	7	7	3	12	6
ENSG00000087842.11	585	572	622	915	721	767	1327	1124	825	1021	827	1270	1719	1341	1698	2014	1957	2143	1354	1631	1651
ENSG00000087884.14	158	151	209	259	185	213	312	220	179	226	175	291	247	154	247	259	231	290	174	254	272
ENSG00000087903.13	25	17	11	14	17	13	24	16	10	22	16	22	21	14	14	19	34	24	28	42	29
ENSG00000087995.15	385.51	331.31	311.51	460.8	327.19	382.02	573.28	443.6	302.09	478.1	368.47	593.84	589.03	460.76	540.36	611.04	597.03	591.35	539.49	674.52	589.91
ENSG00000088002.11	3	3	1	0	0	0	2	1	3	2	0	1	3	0	1	1	7	0	3	5	0
ENSG00000088035.18	337	301	348	511	359	433	741	491	423	511	322	612	492	399	441	460	536	500	300	412	394
ENSG00000088038.19	987	983	968	1119	1011	981	1381	1197	907	1460	974	1548	1317	1056	1247	1265	1358	1331	1041	1403	1282
ENSG00000088053.11	23	16	22	13	16	20	30	20	15	32	9	26	28	19	24	46	36.86	32	23	28.89	23
ENSG00000088179.9	312	283	369	500	335	368	694	399	403	532	370	607	601	448	442	482	559	494	333	461	400
ENSG00000088205.13	905	809	950	1299	983	1045	1697	1255	981	1439	999	1607	1547	1247	1483	1720	1827	1854	1602	2078	1869
ENSG00000088247.17	2776	2641	2608	3152	2852	2893	4258	3632	2617	4268	3006	4457	4705	3955	4367	5027	5260	5265	4489	5942	5235
ENSG00000088256.9	1676	1610	1566	1810	1620	1615	2306	1836	1531	2590	1753	2633	2476	2126	2347	2454	2578	2661	2261	3188	2752
ENSG00000088280.19	986	1101	1019	1122	1077	1141	1483	1360	907	1443	1001	1510	1742	1520	1517	1912	1939	1761	1398	1798	1521
ENSG00000088298.13	726	724	737	847	773	768	1076	994	733	939	701	1059	907	644	933	970	984	921	691	893	830
ENSG00000088305.18	98	71	99	88	98	110	131	102	78	148	92	130	127	114	111	114	131	123	90	109	112
ENSG00000088320.4	0	0	0	0	0	0	0	0	0	0	0	0	0	0	0	0	0	0	0	0	0
ENSG00000088325.16	215	177	183	232	171	155	241	260	157	342	252	437	331	246	271	260	272	321	217	325	357
ENSG00000088340.16	201	282	214	333	256	308	587	243	187	326	186	364	300	268	277	307	313	228	177	195	181
ENSG00000088356.6	687	567	569	802	679	709	965	924	723	899	693	1095	995	822	960	1216	1180	1300	1084	1436	1422
ENSG00000088367.23	239	239	216	294	241	289	434	382	262	384	313	413	433	344	341	409	414	395	536	736	520
ENSG00000088386.17	660	620	701	814	701	734	1128	784	690	795	597	942	809	654	675	661	684	686	353	463	372
ENSG00000088387.19	194	189	206	244.78	217	221	343	263	184	288	194	351.83	280	272	241	356	357	307	422	541	459
ENSG00000088448.14	1310	1222	1340	1808	1308	1331	2572	1610	1315	1923	1341	2280	1974	1541	1662	2048	2332	2155	1918	2475	2374
ENSG00000088451.11	240	216	261	308	289	301	410	375	278	339	237	427	318	275	290	326	382	376	268	366	312
ENSG00000088538.13	18	16	10	18	15	13	29	15	16	15	14	33	31	19	16	25	12	23	28	23	24
ENSG00000088543.15	129	121	113	128	110	120	166	163	110	166	116	161	148	114	154	110	141	126	65	62	84
ENSG00000088682.14	1136.97	1115.95	1060	1415	1217	1276	1751.99	1539	1173	1386	1049	1613.97	1427.98	1140	1382	1303	1462	1586	869.99	1104.93	1119
ENSG00000088726.16	4	5	3	3	4	5	9	1	6	3	5	19	18	12	10	11	8	13	19	32	31
ENSG00000088727.12	52	28	38	50	47	36	63	58	39	60	39	65	63	44	54	75	73	70	64	82	58
ENSG00000088756.12	17	13	15	17	12	9	27	24	22	25	14	27	15	24	14	24	34	25	21	28	17
ENSG00000088766.12	1465	1442	1613	2374	1720	1841	3103	2345	1806	2180	1533	2625.48	2333	1842.17	2264	2167	2331	2404	1124	1410	1471
ENSG00000088782.5	0	0	0	0	0	0	0	0	0	0	0	0	0	0	0	0	0	0	0	0	0
ENSG00000088808.18	892	960	885	985	968	985	1244	1021	774	1377	901	1279	1328	1076	1169	1339	1443	1311	1434	1850	1570
ENSG00000088812.18	3927	4182	4434	5726	4284	4724	7526	5015	4516	6104	4252	6860	5461	4464	4738	4506	5267	4805	3471	4419	3943
ENSG00000088826.18	588	461	490	554	418	454	763	711	542	897	663	897	1084	889	1132	1502	1557	1574	2148	2995	2513
ENSG00000088827.12	0	0	0	0	0	0	0	0	0	0	0	0	0	0	1	0	0	0	0	0	0
ENSG00000088832.17	2591.2	2495.59	2684.21	3476.28	2690.3	2635.9	4934.86	3780.59	3139.45	3430.81	2519.4	4284.24	3775.28	2880.46	3818.77	4254.7	4518.21	4738.25	3678.64	5011.88	4483.82
ENSG00000088833.17	1596	1574	1517	1811	1567	1755	2436	2173	1655	2213	1665	2468	2377	1896	2431	2565	2579	2645	2090	2754	2515
ENSG00000088836.14	46	38	49	46	33	45	78	58	52	73	40	95	61	40	56	57	84	64	63	107	113
ENSG00000088854.12	475	422	412	627	418	476	840	438	453	646	481	764	680	570	538	696	821	679	792	1115	839
ENSG00000088876.12	165.39	187	191	245.62	191	178.78	275.72	255	178	288.99	185	271	327	252	268	316	301.48	285.3	241	305	275
ENSG00000088881.20	613	560	530	684	660	570	746	723	538	788	595	851	830	651	758	865	937	883	1016	1377	1074
ENSG00000088882.8	155	133	115	152	120	153	204	181	109	209	143	227	189	169	168	181	181	182	113	160	138
ENSG00000088888.18	2385	2487	2609	2974	2542	2731	4335	2768	2446	3907	2691	4271	4654	4490	3388	4288	4825	4015	3773	4999	4436
ENSG00000088899.15	1356	1187	1142	1265	1202	1137	1770	1419	1084	1801	1377	1950	2316	2020	2211	3174	3326	2947	2802	3835	3210
ENSG00000088926.13	677	778	806	960	939	929	1280	941	745	968	694	1139	890	751	860	699	824	774	367	435	454
ENSG00000088930.8	1228	1113	1239	1557	1208	1437	1970	1679	1253	1829	1283	2189	2004	1656	1776	2134	2169	2190	2091	2691	2453
ENSG00000088970.16	220	240	224	245	255	212	324	267	165	274	232	343	248	198	276	245	244	279	211	277	226
ENSG00000088986.11	3302	2930	3388	4543	3450	3651	5727	4785	3886	3689	2915	5093	4331	3544	4400	4731	4889	5787	3531	4721	4588
ENSG00000088992.18	45	34	33	49	38	27	58	37	45	60	37	58	50	56	47	60	55	68	67	79	96
ENSG00000089006.16	1868.95	1841	1901.8	2544.95	2159.53	2257	3058.8	2598.36	2002.75	2590.99	1910.98	3138.69	2751.81	2079.78	2434.75	2619.93	2784.97	2759.91	1910.83	2314	2289.91
ENSG00000089009.15	10083.8	9138.3	9615.98	12772.8	10647.5	10895	14825.5	14078.2	10184.9	12118.1	9079.8	15135.4	13361.5	9981.66	12903	13477.8	13333.7	16224.2	10874.8	15052.8	13850.8
ENSG00000089012.14	0	0	1	0	0	0	0	0	0	0	0	0	0	0	0	0	0	0	0	1	0
ENSG00000089022.14	579	573	651	732	649	661	994.3	685	623	895.48	698	1080	1071.67	890	892.91	1055.07	1208	1129	908	1210.12	1145
ENSG00000089041.17	115	173	193	188	196	220	288	169	163	204	122	218	100	75	108	51	65	54	9	8	11
ENSG00000089048.14	346	311	318	396	320	398	574	423	279	550	396	661	637	510	551	719	707	731	734	848	836
ENSG00000089050.16	641	583	819	839	664	682	1258	838	805	920	650	1138	963	722	810	828	975	864	576	651	645
ENSG00000089053.13	2181	2069	2254	2744	2303	2447	3666	2866	2316	2985	2131	3465	2944	2417	2743	2682	2872	2913	2021	2702	2283
ENSG00000089057.15	390	369	460	556	484	479	836	542	481	634	451	676	562	525	548	567	688	624	521	568	562
ENSG00000089060.11	614	619	598	702	613	619	945	732	624	852	666	895	860	649	759	894	899	855	822	1155	888
ENSG00000089063.15	1767	1737.99	2068	2690	2079	2271	3687.99	2677.99	2329	2406.98	1754	3272	2552	1860	2481	2410	2594	2760.95	1920	2339	2329.99
ENSG00000089091.16	26	11	19	31	27	31	26	31	21	33	15	34	28	24	28	29	25	33	24	25	32
ENSG00000089094.19	346	329	267	316	337	329	478	364	275	470	339	561	562	516	446	558	631	643	532	705	635
ENSG00000089101.18	1	0	3	5	2	0	2	1	1	1	0	3	3	0	2	1	5	1	1	0	7
ENSG00000089116.4	0	0	2	1	0	0	0	0	0	0	0	0	0	0	0	2	2	3	8	12	5
ENSG00000089123.16	147	131	140	158	143	154	251	197	142	185	172	262	196	150	195	202	202	214	162	187	163
ENSG00000089127.13	125	102	101	141	123	133	184	177	119	136	114	190	156	109	130	109	105	111	42	54	49
ENSG00000089154.11	3030	3021	2887	3394	3083	3338	4511	3562	2728	4603	3201	4961	4686	4050	4195	4645	4763	4910	3808	5141	4633
ENSG00000089157.16	19265.7	18975.7	19794.9	26637.4	21065.3	21690.5	31430.4	27796.4	22024.5	23643.7	18248.4	29071.7	24699.8	18745.4	25762.8	27547.1	27931	31871.5	21908.7	29960.7	27150.7
ENSG00000089159.16	1671	1642	1656	2117	1608	1711	2831	2011	1801	2491	1752	2708	2517	2012	2301	2600	3001	2658	3069	4082	3324
ENSG00000089163.4	164	129	183	209	197	194	285	236	193	177	148	248	190	119	175	108	151	163	56	69	64
ENSG00000089169.15	1	0	1	0	1	2	3	0	2	4	0	0	4	2	1	1	0	1	0	0	1
ENSG00000089177.18	445	416	438	465	446	480	674	513	419	712	394	720	670	647	583	558	631	636	634	898	736
ENSG00000089195.15	223	194	222	244	215	250	336	303	225	368	240	448	397	321	393	491	498	523	483	709	613
ENSG00000089199.10	2	1	1	0	3	0	4	0	2	3	4	0	3	1	3	1	5	6	0	1	7
ENSG00000089220.5	19564	20449	20484	26228	22751	23559	30904	28553	19677	24829	19619	30592	25724	20099	25566	23525	23414	25695	12971	15763	15693
ENSG00000089225.19	0	0	0	0	0	0	0	0	1	0	0	0	0	0	0	0	0	1	0	0	0
ENSG00000089234.16	444	400	439	478	468	487	607	536	373	646	436	697	657	578	610	678	725	693	725	995	798
ENSG00000089248.7	3155	2949	3057	4132	3476	3637	4989	4438	3330	3855	3172	4683	4127	3408	4175	4161	4329	4589.99	2900	3991	3759
ENSG00000089250.19	0	2	0	0	0	0	0	0	0	0	0	0	0	0	1	0	0	0	0	0	0
ENSG00000089280.18	2974	3060	3008	3391	3143	2989	5041	3642	2749	4844	3266	5049	4548	4125	4015	4956	5325	4923	4914	7090	6324
ENSG00000089289.16	537	429	534	687	556	569	820	735	526.99	647	531	825	636	552	703	820	826	873	659	931	776
ENSG00000089327.15	30	7	14	25	10	23	32	25	32	33	21	35	45	7	26	38	39	33	109	194	152
ENSG00000089335.21	457.05	458	471.26	604.28	495.18	492.19	788.71	489.16	436	622.58	462.24	739.41	621.44	518.65	554.88	519.4	588.22	573.78	363	413.4	448.99
ENSG00000089351.14	706	703	676	770	727	654	1026	895	666	1076	640	966	985	785	996	1443	1353	1363	1755	2683	2000
ENSG00000089356.18	38	30	27	44	28	32	65	38	40	28	24	26	15	19	14	14	14	24	5	12	9
ENSG00000089472.16	572	511	593	621	550	578	772	713	548	710	585	986	719	566	666	645	648	702	464	568	535
ENSG00000089486.17	1157	1212	1121	1369	1187	1140	1934	1542	1196	1570	1267	1775	1902	1519	1906	2169	2220	2274	1724	2222	1960
ENSG00000089505.17	10	9	15.92	11	20.94	7	12	20	10	10	11	36.88	19	10	17.53	8.68	17	14.44	8	24	12
ENSG00000089558.9	0	0	0	0	0	0	2	0	1	0	1	0	0	0	3	2	1	0	1	2	3
ENSG00000089597.18	8192	8232	8909	11653	9094	9927	16067	11812	9601	12222	8885	14146	12023	10301	11976	12112	13260	12380	9314	11496	11012
ENSG00000089639.11	218	177	191	169	164	171	214	187	181	304	225	301	391	303	310	525	488	468	548	764	643
ENSG00000089682.16	390	421	382	471	422	479	593	452	340	676	440	656	650	551	489	602	570	585	472	594	667
ENSG00000089685.15	63	45	66	70	48	52	80	91	86	85	56	114	69	38	59	48	42	57	26	33	31
ENSG00000089692.9	11	6	6	14	16	10	21	20	9	11	11	14	9	13	13	3	7	5	3	9	8
ENSG00000089693.10	3692	3553	3382	4475	3760	3800	5856	4926	3758	4695	3642	5478	4771	3807	4843	4791	4956	5302	3803	5271	4581
ENSG00000089723.10	73	76	111	135	128	119	193	136	110	118	83	143	125	106	90	98	100	123	80	76	105
ENSG00000089737.17	1679	1589	1690	1937	1750	1752	2327	2157	1437	2394	1740	2707	2611	2108	2400	2828	2803	3018	2501	3402	3057
ENSG00000089775.11	268	282	286	410	276	316	526	285	276	393	263	425	364	286	290	264	321	303	179	218	192
ENSG00000089818.18	502.87	478.88	556.87	655	539	654	932	669	562.88	725.9	512	871.75	742	523	606	677	784	810.92	627	860	739
ENSG00000089820.15	168	132	126	168	125	142	200	160	131	193.43	145	171.29	211	159	180	189	190.72	189	113	141	148.73
ENSG00000089847.12	71	86	66	87	103	89	114	70	64	111	92	96	109	97	88	84	89	90	40	46	51
ENSG00000089876.12	1048	776	1023	1303	980	1015	1761	1297	1048	1455	914	1779	1550	1175	1445	1803	2069	1976	1981	2588	2344
ENSG00000089902.10	870	838	920	1095	923	1017	1623	1120	901	1274	947	1423	1423	1079	1112	1258	1459	1379	1221	1553	1448
ENSG00000089916.18	827	912	911	1120	907	912	1629	1046	918	1378	931	1561	1502	1286	1145	1463	1837	1515	1843	2455	2179
ENSG00000090006.17	35	32	39	36	47	34	43	40	26	58	28	56	48	37	43	46	37	51	29	45	54
ENSG00000090013.11	885	892	837	1292	1045	970	1387	1382	1092	1009	860	1313	1354	1052	1504	1641	1589	1781	1215	1695	1425
ENSG00000090020.11	170	136	148	165	158	128	265	180	176	230	167	278	286	274	261	309	381	341	400	563	452
ENSG00000090054.15	711.75	607.83	714.81	946.14	720.93	828.26	1284.91	964.77	840.83	1103.5	716.53	1252.89	1010	854.69	961.27	1019.9	1182.45	1049.79	1063.48	1368.29	1288.99
ENSG00000090060.18	3500	3245	3782	4803	3682	3892	6230	4753	3923	5350	3675	6290	5534	4442	4854	5813	6720	6104	5643	7260	6561
ENSG00000090061.17	1509	1426	1423	1671	1409	1471	2127	1893	1502	2010	1494	2375	2202	1769	2148	2294	2372	2288	2174	2798	2421
ENSG00000090097.21	1311	1100	1042	1170	1098	990	1531	1400	1145	1693	1178	1767	2151	1790	2135	2662	2918	2801	2264.8	2919	2574
ENSG00000090104.12	0	0	0	0	0	0	0	0	0	0	0	0	0	0	0	0	0	0	0	0	0
ENSG00000090238.12	534	513	481	690	529	513	827	709	489	555	467	617	459	382	494	427	418	441	289	387	302
ENSG00000090263.16	609	578	598	801	654	788	998	836	618	619	578	920	775	556	662	704	643	818	415	641	555
ENSG00000090266.13	1177	1084	1067	1708	1196	1255	1962	1660	1304	1235	1045	1616	1397	947	1333	1440	1444	1700	1008	1487	1339
ENSG00000090273.14	1905	1739	1804	2182	1937	1993	2622	2497	1829	2829	1881	3148	3119	2534	3091	3871	3736	3939	3821	4943	4565
ENSG00000090316.16	1477	1415	1320	1653	1431	1461	2313	1826	1455	1853	1398	2275	2126	1737	1971	2216	2286	2295	1837	2389	2346
ENSG00000090339.9	1914	1376	1452	1556	1360	1421	1872	1965	1493	2089	1464	2609	1710	1034	1699	1408	1486	1691	1330	1906	1955
ENSG00000090372.15	1259	1220	1214	1359	1215	1208	1806	1603	1159	1816	1313	1948	1920	1608	1783	2198	2257	2262	1961	2591	2384
ENSG00000090376.11	142	201	176	221	186	230	284	201	180	215	147	283	204	140	165	106	173	152	78	104	103
ENSG00000090382.6	1189	1193	1328	1943	1313	1402	2584	1872	1683	1464	1237	2101	1368	1064	1437	1087	1352	1486	817	1129	1155
ENSG00000090402.8	9	5	8	13	14	9	10	11	20	6	5	16	6	12	14	10	9	10	3	6	1
ENSG00000090432.7	864	820	838	1148	814	952	1421	1152	914	1254	945	1313	1289	992	1309	1343	1448	1412	1232	1649	1380
ENSG00000090447.12	118	123	105	154	110	140	199	132	110	191	102	177	204	143	177	177	165	203	122	115	118
ENSG00000090470.15	308	313	291	426	323	348	530	374	321	447	298	524	433	359	381	478	522	482	370	497	455
ENSG00000090487.11	1255	1270	1454	2023	1480	1508	2724	2070	1654	1834	1440	2264	1960	1498	1839	2013	2156	2233	1631	2133	1971
ENSG00000090512.12	184	253	230	331	300	301	388	272	260	219	182	276	190	141	146	111	116	144	45	48	65
ENSG00000090520.11	1686	1486	1558	2012.74	1792	1696.65	2632.83	2118.48	1607	2109.8	1614	2517.95	1874.83	1533	1896	2026	2080	2171	1865	2490	2183.06
ENSG00000090530.10	150	111	101	105	118	101	179	116	134	193	123	219	175	113	162	173	171	203	186	252	248
ENSG00000090534.20	234	251	255	311	252	266	377	324	270	330	243	404	359	279	328	340	335	347	250	344	364
ENSG00000090539.15	1041	1253	985	1252	1114	992	1722	1236	1010	1432	1074	1363	1207	983	1129	1016	1077	893	495	636	572
ENSG00000090554.13	23.18	30.56	13	23.45	23.85	34.5	20.96	35.62	24.73	19	8.08	20.26	21.59	17	32.79	22.54	25.62	16.59	11.46	15.14	10.97
ENSG00000090565.16	1228	1252	1120	1433	1316	1333	1773	1438	1133	1747	1280	1761	1815	1516	1654	1675	1736	1658	1192	1658	1418
ENSG00000090581.10	1157	1182	1011	1387	1227	1137	1634	1566	1110	1424	1152	1548	1526	1072	1430	1524	1522	1641	1277	1671	1415
ENSG00000090612.21	694	662	723	871	791	909	1066	822	627	1012	738	1123	982	763	853	862	880	855	567	810	723
ENSG00000090615.15	2296	2285	2138	2555.99	2271	2523	3541	2418	1848	3539	2314	4011	4161	3417	2870	3414	3659	3370.99	3264	4309.99	4037
ENSG00000090621.14	4240	4116	4012	5099	4536	4470	6691	5386	4192	5855	4209	6488	6117	4790	5680	6244	6658	6220	5611	7226	6218
ENSG00000090659.18	0	0	0	0	0	0	0	0	0	0	0	0	0	0	0	0	0	0	0	0	0
ENSG00000090661.12	1599	1661	1574	1982	1773	1811	2659	2081	1643	2131	1660	2314	2025	1587	2068	1917	2023	2075	1177	1605	1387
ENSG00000090674.16	320.95	260	252.95	358	264.78	298.8	494.91	376	311.91	351.84	290	411	379	318.85	363	475	572.86	503.22	574	823.87	665.8
ENSG00000090686.16	1104	1044	1110	1269	1114	1162	1631	1287	1007	1642	1037	1772	1569	1291	1344	1446	1584	1602	1195	1497	1498
ENSG00000090776.6	768	714	681	767	679	708	930	870	653	940	680	1004	909	772	936	1028	1003	995	1007	1387	1078
ENSG00000090857.13	1042.87	1015.28	1150.34	1395.78	999.21	1222.75	1920.96	1250.35	1028.34	1597.65	1077.87	1712.94	1413.37	1226.43	1216.23	1235.92	1475.84	1280.94	904.83	1166.51	1053.07
ENSG00000090861.15	3544	3956	3760	4244	4062	4357	5209	4909	3495	5780	3938	5998	6470	5268	5656	6465	6470	6439	4919	6248	5667
ENSG00000090863.11	3537	3535	3625	4159	3735	3995	5852	4345	3147	5165	3644	5564	4972	4149	4489	4481	4711	4526	3430	4667	4141
ENSG00000090889.12	35	19	23	31	17	26	42	27	18	64	18	58	38	21	32	21	22	35	17	17	21
ENSG00000090905.19	1477	1610	1712	1841	1632	1767	2469	1737	1419	2468	1652	2511	2409	2046	2030	1996	2175	2048	1425	1786	1799
ENSG00000090924.15	882	735	699	781	643	660	1099	839	697	1327	841	1323	1454	1087.44	1231	1624	1778	1596	1896	2451	2260
ENSG00000090932.10	3	4	2	9	5	4	7	12	2	5	0	8	8	10	4	13	8	8	8	11	4
ENSG00000090971.5	355	320	300	356	301	280	466	415	316	384	335	479	414	325	470	441	470	506	331	425	392
ENSG00000090975.12	633	639	611	718	624	609	920	725	654	1004	715	995	1012	876	884	1038	1117	1010	1026	1300	1078
ENSG00000090989.18	654	634	668	760	727	785	1023	881	648	1000	637	1125	1079	798	840	1105	1170	1136	1024	1329	1231
ENSG00000091009.8	468.49	541.51	507.83	643.64	557.93	573.75	863.68	630	502.21	810.07	541.15	935.99	891.44	668.61	721.47	846.6	876.24	957.92	874.26	1048.92	989.19
ENSG00000091010.6	2	0	1	1	3	2	0	0	0	2	4	1	2	5	1	3	4	1	1	7	1
ENSG00000091039.17	938	833	1079	1278	939	1047	1694	1129	1069	1580	1056	1916	1640	1339	1257	1588	1973	1660	1882	2524	2129
ENSG00000091073.19	328.88	294.94	290.47	375.65	309.71	308.2	450.39	388.54	297.41	448.58	308.18	443.67	429.17	344.83	429.03	512.77	509.92	478.04	520.43	597.35	464.92
ENSG00000091106.19	0	0	0	3	1	0	2	0	0	1	0	0	0	0	0	1	0	0	0	2	0
ENSG00000091127.14	151	122	146	175	146	152	274	177	138	245	150	291	343	304	286	410	498	477	473	594	600
ENSG00000091128.13	1	3	3	0	1	0	3	2	4	1	1	0	1	4	0	2	4	3	3	3	2
ENSG00000091129.20	255	218	252	320	261	279	499	364	302	535	358	527	1077	891	756	1855	2007	1576	2571	3353	2807
ENSG00000091136.14	2744	2245	2323	2576	2316	2288	3267	2942	2305	4038	2582	4389	4957	4479	4282	6939	7241	6762	6656	8877	8176
ENSG00000091137.14	1	1	4	4	3	4	1	7	4	4	4	1	7	1	5	4	3	5	8	5	4
ENSG00000091138.12	3	4	3	2	1	0	7	1	9	1	3	12	2	5	5	2	2	4	3	1	2
ENSG00000091140.14	2022	1827	2193	2769	2163	2336	3510	2819	2273	2846	2018	3267	2918	2241	2482	2502	2752	2799	2183	2755	2432
ENSG00000091157.13	397	383	481	584	476	518	753	531	495	630.59	422	783.35	584	488	477	545	597	543	367	516	473
ENSG00000091164.13	1182	1099	1182	1540	1234	1355	2223	1658	1339	1474	1177	1980	1991	1493	1719	2170	2218	2326	1989	2807	2469
ENSG00000091181.19	0	0	0	1	1	0	0	1	0	0	0	0	0	0	0	0	0	0	0	0	0
ENSG00000091262.15	4110.72	4595.98	4242.8	5203.5	4694.81	4920.46	6708.48	5422.91	4236.96	5581.51	4199.22	5986.47	4575.02	3811.61	4437.34	3403.08	3714.83	3606.64	1497.94	1835.81	1862.83
ENSG00000091317.8	1866	1847	2253	2977	1944	2323	4174	2642	2333	2602	2047	3429	2402	1917	2227	2049	2436	2392	1618	2115	2032
ENSG00000091409.15	2201	2227	2479	3099	2429	2707	4272	3017	2551	3618	2613	4383	4290	3887	3713	4915	5444	4534	7390	10599	8031
ENSG00000091428.18	87	58	76	102	77	90	113	102	79	105	89	126	92	82	100	119	127	124	98	154	154
ENSG00000091436.17	647	544	587	802	719	714	999	826	648	995	700	1244	1203	882	923	1330	1452	1281	1519	1904	1618
ENSG00000091482.8	81	62	76	86	75	84	146	108	82	107	90	111	128	86	93	96	90	87	58	58	49
ENSG00000091483.6	1629	1699	1871	2349	1970	2072	2770	2501	1794	2402	1654	2653	2102	1702	2242	2179	2097	2475	1502	1878	1763
ENSG00000091490.11	438	376	479	595	376	471	764	589	469	751	592	1017	1093	862	899	1419	1572	1441	1849	2496	2069
ENSG00000091513.16	306625	364732	368970	429789	394929	419298	524201	442537	319032	409556	308310	482381	331637	267918	321862	269216	273821	287700	154965	192679	181397
ENSG00000091527.15	6311	5844	6250	7409	6410	6613	9619	8197	5943	9620	6775	10958	11075	8560	9322	11474	12489	12054	12147	16267	14365
ENSG00000091536.19	43	53	61	53	52	38	81	44	37	62	46	55	58	26	37	47	35	39	23	35	30
ENSG00000091542.9	1812	1819	1900	2236	1908	1980	3096	2490	1918	2408	1913	2838	2566	2076	2608	2736	2784	2916	2040	2954	2355
ENSG00000091583.11	16594	17018	18538	24896	20292	21747	31276	25681	19911	20359	15636	26971	18489	14312	18995	17507	18080	20062	10692	13595	13361
ENSG00000091592.16	0	3.8	0	0	0	0	1.12	0	0	1.18	0	0	1	1.16	0	0	1.08	0	0	0	3
ENSG00000091622.16	134	135	113	100	118	118	159	125	110	202	117	198	157	142	144	169	148	124	154	175	189
ENSG00000091640.8	960	956	934	1230	1013	1001	1352	1350	932	1194	889	1354	1202	946	1240	1207	1300	1412	970	1325	1205
ENSG00000091651.9	156	124	132	137	107	146	228	167	138	200	108	210	174	126	151	138	182	186	90	114	112
ENSG00000091656.19	226	211	278	336	254	341	405	238	239	395	245	381	329	293	270	266	325	271	218	306	232
ENSG00000091664.9	0	0	0	0	0	0	0	0	0	0	0	0	0	0	0	0	0	0	0	0	0
ENSG00000091704.10	9	13	5	13	13	7	15	10	13	13	8	14	9	6	10	9	9	16	8	14	9
ENSG00000091732.16	353	354	320	471	411	395	625	528	337	442	304	569	514	405	446	494	583	576	428	588	520
ENSG00000091831.23	0	0	1	1	0	0	0	0	0	0	0	1	1	0	0	0	0	1	0	1	1
ENSG00000091844.8	8	8	12	7	14	5	12	9	10	15	10	7	13	10	8	20	20	17	54	74	59
ENSG00000091879.13	7	7	9	3	6	9	28	19	2	20	11	24	17	4	10	23	21	22	26	46	52
ENSG00000091947.10	415	389	395	551	413	372	639	563	456	490	352	567	444	424	496	539	569	576	367	409	365
ENSG00000091972.18	11	21	13	19	12	9	21	9	18	12	16	20	15	19	14	14	13	12	18	23	20
ENSG00000091986.15	22	11	21	16	20	22	17	27	14	24	25	20	24	18	8	21	22	14	24	26	32
ENSG00000092009.10	0	0	0	0	0	0	0	0	0	0	0	0	0	0	0	0	0	0	0	0	0
ENSG00000092010.15	1438	1457	1495	1943	1657	1684	2262	2050	1456	1741	1364	2156	1902	1543	1828	1892	1832	2060	1329	1762	1576
ENSG00000092020.10	250	276	272	442	361	352	526	454	313	340	303	460	410	323	388	388	431	441	403	554	443
ENSG00000092036.18	185.34	177.98	202	282	234.04	221.22	358.76	297.6	209.73	221.93	218.48	371	247.2	233	298	250.98	266.78	344	147.62	211	247
ENSG00000092051.17	0	0	0	2	0	1	0	0	1	2	2	0	1	0	1	1	0	1	0	2	0
ENSG00000092054.13	0	0	0	0	0	0	0	0	0	0	0	0	0	0	1	0	0	0	0	0	0
ENSG00000092067.5	0	0	0	0	0	0	0	0	0	0	0	0	0	0	0	0	0	0	0	0	0
ENSG00000092068.20	65	54	39	74	40	67	89	63	55	93	64	107	64	50	72	69	86	80	116	186	170
ENSG00000092094.11	613	699	679	846	768	803	1084	793	683	965	671	989	890	750	830	919	1003	910	589	776	723
ENSG00000092096.16	50	56	45	55	53	37	63	76	33	56	51	54	55	52	51	64	72	76	30	45	33
ENSG00000092098.17	612.35	672.1	637.75	614.66	610.34	665.18	876.5	796.73	612.47	918.06	656.69	894.84	900.07	825.1	913.8	983.17	984.15	1065.28	856.84	1067.71	949.62
ENSG00000092108.21	1004	938	1121	1342	1146	1219	1821	1446	1125	1484	1018	1773	1618	1121	1411	1550	1585	1708	1226	1605	1433
ENSG00000092140.16	217	194	226	271	203	231	398	259	245	337	204	389	343	305	334	343	460	406	392	503	405
ENSG00000092148.13	4032	4149	4443	5601	4385	5142	7342	5120	4383	6444	4483	7363	6057	5177	5209	5243	6093	5524	4727	6248	5633
ENSG00000092199.17	7609.83	6953.63	7773.11	10526.7	8053.41	8336.33	13460.8	10590.2	8514.37	10059.5	7421.23	12468.1	10683.1	8153.97	9918.55	10813.2	11512.1	12227.5	9044.88	12429.3	10776.8
ENSG00000092200.12	2	5	1	8	5	3	3	2	3	3	4	3	6	5	0	7	4	15	2	4	3
ENSG00000092201.10	1615.88	1419.96	1557.94	1664.98	1628.99	1613.94	2234.91	1816.97	1319.93	2300.93	1719.91	2645.94	2577.91	2028.97	2108.97	2311.95	2446.95	2644.81	2121.92	2732.96	2538.91
ENSG00000092203.14	1509	1461	1611	1910	1666	1781	2658	2002	1547	2240	1494	2552	2247	1767	2079	2215	2356	2361	1970	2669	2426
ENSG00000092208.17	115	121	115	174	136	131	221	144	134	158	109	195	189	140	158	197	191	224	140	226	219
ENSG00000092295.12	28	30	21	34	12	20	31	21	28	29	22	46	27	22	24	13	8	23	16	25	17
ENSG00000092330.18	547	541	567	758	637	644	982	815	648	839	633	954	897	746	879	921	961	1006	863	1286	1023
ENSG00000092345.13	0	0	0	0	0	0	0	0	0	0	0	0	0	0	0	0	0	0	0	0	0
ENSG00000092377.15	0	0	0	0	0	0	0	0	0	0	0	0	0	0	0	0	0	0	0	0	0
ENSG00000092421.16	781	558	602	746	560	585	1115	839	650	1255	905	1405	2184	1918	1751	4021	4327	3565	6448	8868	6842
ENSG00000092439.16	1194	1283	1573	1896	1366	1599	2806	1620	1502	2065	1468	2557	2200	1745	1652	1886	2191	1918	1855	2376	2160
ENSG00000092445.12	967	754	740	961	798	755	1139	1000	827	1040.98	794	1193	1008	802	969	923	1059	1102	1146	1418	1180
ENSG00000092470.12	10	14	19	8	19	9	26	13	21	22	11	29	15	8	14	13	17	18	7	17	21
ENSG00000092529.24	70.11	77.37	68.02	87.34	62.4	96.96	130.58	62.7	81.37	91.63	63.15	91.83	90.18	44.2	58.25	73.54	92.82	87.23	47.93	93.7	76.13
ENSG00000092531.10	1179	967	1135	1430	1111	1289	1945	1597	1219	1433	1120	1885	1591	1066	1409	1437	1613	1764	1323	1756	1535
ENSG00000092607.15	7	6	2	5	3	3	6	13	8	18	8	14	31	23	21	38	30	45	43	49	35
ENSG00000092621.12	4499	4785	4855	5771	5286	5359	7440	6640	4980	6650	5048	7268	7379	5741	6965	6776	6855	7542	4082	4863	4647
ENSG00000092758.18	5	3	3	7	3	5	6	3	7	5	7	8	2	3	2	9	4	2	3	4	9
ENSG00000092820.18	3904	3640	3652	3943	3850	3942	5081	4714	3155	5417	3650	5879	5656	4664	5169	6795	6709	6823	6657	8966	7698
ENSG00000092841.18	14652	13202	14227	19487	15589	15939	22967	20840	16560	17610	13245	21314	18254	13970	20119	21778	21368	24761	16285	23424	21313
ENSG00000092847.12	1064	1076	1197	1449	1189	1225	2096	1385	1260	1748	1140	1835	1624	1331	1535	1531	1760	1652	1220	1410	1519
ENSG00000092850.12	2	1	1	1	3	1	2	5	3	2	2	2	4	2	2	5	1	4	3	3	1
ENSG00000092853.14	28	11	33	17	17	22	35	27	21	41	22	39	29	14	38	31	42	27	28	29	46
ENSG00000092871.16	993	1031	1141	1442	1061	1196	2070	1365	1273	1599	1190	1958	2115	1952	1868	2520	2600	2238	2787	3716	3022
ENSG00000092929.11	43	41	42	57	40	52	48	62	26	78	63	44	76	39	36	53	48	48	46	75	50
ENSG00000092931.11	377	374	415	507	404	429	770	544	442	553	394	661	582	535	496	595	661	666	505	777	621
ENSG00000092964.18	385	363	403	546	431	465	679	545	467	579	375	678	476	495	421	545	623	528	537	735	582
ENSG00000092969.12	761.58	426.25	530	559.45	428.68	469.28	717.57	687.05	516.93	927.26	597.99	1155.67	648.55	482.85	598.9	508.95	626.07	768.66	631.01	717.66	898.42
ENSG00000092978.11	229	258	276	392	298	343	542	371	290	398	309	511	456	358	395	431	443	410	337	426	412
ENSG00000093000.19	1109.7	1051.76	1081.52	1466.74	1162	1282.81	2127.46	1423.83	1178	1725.72	1143.72	1979.46	1764.7	1333.91	1565.2	1678.99	1886.24	1749.72	1609.34	2206.81	2008.19
ENSG00000093009.10	8	7	10	17	9	7	33	14	8	21	16	22	16	9	16	13	15	16	14	10	17
ENSG00000093010.13	727	931	839	1141	939	1027	1592	1237	964	938	756	1228	817	613	915	726	720	818	345	440	404
ENSG00000093072.18	435	428	454	572	436	463	773	502	495	553	479	673	565	456	486	489	585	474	357	473	415
ENSG00000093100.13	1032.95	934.51	858.22	994.81	990.46	971.24	1391.28	1084.38	820.31	1481.92	1078.17	1407.96	1714.61	1155.72	1438.58	1711.56	1689.45	1563.71	1354.69	1570.69	1510.55
ENSG00000093134.14	40	41	42	52	65	35	75	76	60	61	35	89	65	48	58	55	38	59	18	37	37
[truncated: 58,612 more rows]
