# Supplementary material for: An updated comparison of microarray and RNA-seq for concentration response transcriptomic study: case studies with two cannabinoids, cannabichromene and cannabinol
Source: BMC Genomics. 2025 Apr 23;26:392. doi: 10.1186/s12864-025-11548-3 (PMC12016467; doi:10.1186/s12864-025-11548-3)
Supplement: Supplementary file 3 — Supplementary Material 3: Table S3. Filtered RNA-seq expression data for CBC-exposed samples (14,347 genes) uploaded for BMC modeling. [file 12864_2025_11548_MOESM3_ESM.xlsx]

## Sheet: CBC_filtered
Table S3. Filtered RNA-seq expression data for CBC-exposed samples (14,347 genes) uploaded for BMC modeling
SampleID	CBC_0uM_1	CBC_0uM_2	CBC_0uM_3	CBC_0.1uM_1	CBC_0.1uM_2	CBC_0.5uM_1	CBC_0.5uM_2	CBC_0.5uM_3	CBC_1uM_1	CBC_1uM_2	CBC_1uM_3	CBC_5uM_1	CBC_5uM_2	CBC_5uM_3	CBC_10uM_1	CBC_10uM_2	CBC_10uM_3	CBC_20uM_1	CBC_20uM_2	CBC_20uM_3	CBC_40uM_1	CBC_40uM_2	CBC_40uM_3
Dose	0	0	0	0.1	0.1	0.5	0.5	0.5	1	1	1	5	5	5	10	10	10	20	20	20	40	40	40
ENSG00000000419	8.42806	8.40009	8.11623	8.18888	8.51879	8.57645	8.51337	8.49055	8.48347	8.36338	8.50882	8.58344	8.4614	8.39037	8.36468	8.29304	8.6035	8.35252	8.2703	8.33535	8.46278	8.49787	8.51964
ENSG00000000457	8.37828	8.18271	8.25118	8.25869	8.29706	8.19744	8.28162	8.32007	8.2271	8.29109	8.24265	8.19663	8.18923	8.30986	8.48619	8.25686	8.24432	8.13949	8.13081	8.39192	8.09965	8.03607	8.18578
ENSG00000000460	6.22094	5.66318	6.09979	5.73024	5.36444	5.9106	5.57397	5.66054	5.78423	6.45796	5.74038	5.7904	5.56864	5.87074	5.9344	6.10787	5.86173	5.98922	5.7188	5.99407	5.5059	5.95688	6.00927
ENSG00000000971	12.3378	12.3862	12.3887	12.4174	12.5166	12.5677	12.5009	12.4547	12.5263	12.5254	12.4058	12.3429	12.3377	12.4071	12.3172	12.2175	12.277	12.1175	12.0366	12.0866	11.8286	11.862	11.8627
ENSG00000001036	10.7958	10.7433	10.7992	10.8075	10.795	10.8945	10.8424	10.8016	10.8894	10.8076	10.7575	10.7784	10.7448	10.9446	10.9814	10.824	10.9363	10.9213	10.8248	10.822	10.941	10.9725	11.0384
ENSG00000001084	10.4943	10.5352	10.471	10.4749	10.5443	10.5756	10.5433	10.4467	10.5572	10.6504	10.534	10.7595	10.7767	10.7504	10.8369	10.9074	10.9355	11.1064	11.1607	11.2414	11.1096	11.065	11.1559
ENSG00000001167	9.59238	9.71945	9.57691	9.75854	9.60324	9.5847	9.49414	9.63928	9.60226	9.534	9.59626	9.72927	9.64552	9.65844	9.65338	9.55934	9.53481	9.6462	9.64647	9.64049	9.9596	10.0126	9.90343
ENSG00000001460	6.7297	6.50233	6.35313	6.30611	6.49883	6.46137	6.55875	6.51922	6.56455	6.78715	6.52453	6.59468	6.71466	6.29729	6.21961	6.2979	6.22181	6.31662	6.36837	6.40867	6.67909	6.70963	6.76189
ENSG00000001461	8.03062	8.01716	8.01706	8.23117	8.15678	8.19744	8.11101	8.18015	8.18645	8.10122	8.02419	8.13661	8.21398	8.24296	8.02546	8.06096	7.99989	7.92483	7.67186	7.98752	8.05615	8.20065	8.13362
ENSG00000001497	8.50429	8.46088	8.60017	8.58648	8.51087	8.28958	8.39751	8.30089	8.50015	8.50432	8.51273	8.54197	8.39802	8.49757	8.66708	8.58334	8.59122	8.69229	8.59479	8.43101	8.81091	8.72322	8.65407
ENSG00000001561	8.42806	8.51444	8.41966	8.46179	8.34689	8.50564	8.32129	8.59657	8.43224	8.43221	8.52441	8.57112	8.50216	8.55752	8.5216	8.28857	8.42125	8.41914	8.26679	8.34357	8.70223	8.68576	8.75649
ENSG00000001617	3.90857	4.16687	3.41343	3.0416	3.32828	4.09871	3.69266	4.16018	3.37366	4.45436	3.79363	2.41891	2.81967	3.75078	3.30916	4.54428	4.21606	3.75539	3.77919	2.48879	3.98308	3.82288	3.66875
ENSG00000001626	4.38253	3.24503	2.83672	3.80955	3.59143	2.89786	2.0887	2.64953	3.05032	2.07686	2.98707	2.09111	2.81967	2.53429	2.11834	2.9629	2.69939	3.90457	1.99824	2.48879	3.4099	2.28335	2.15262
ENSG00000001629	10.0882	9.77437	9.95282	10.0281	9.98576	9.89611	9.99657	10.0342	10.0086	9.97109	9.90111	10.0104	9.94951	10.0735	9.89027	9.89125	9.9499	10.0229	9.98492	10.0774	10.2423	10.4178	10.3838
ENSG00000001630	12.2175	12.3624	12.2423	12.4655	12.5838	12.6774	12.6786	12.4364	12.4622	12.6054	12.6197	12.4643	12.4382	12.4382	12.309	12.2232	12.2642	12.117	12.0465	12.1012	11.9322	11.8298	11.7172
ENSG00000001631	8.18063	8.16857	8.35739	8.65021	8.44138	8.17432	8.63946	8.09583	8.51311	8.58907	8.32991	8.3565	8.46878	8.38864	8.50467	8.62931	8.4683	8.51311	8.45697	8.5037	8.31342	8.34809	8.51655
ENSG00000002016	7.57165	7.50401	7.47337	7.64152	7.81483	7.71335	7.66339	7.65054	7.5104	7.68229	7.65842	7.46826	7.56117	7.45092	7.38578	7.47345	7.72805	7.70957	7.87418	7.98962	7.09321	7.07506	7.2009
ENSG00000002330	8.05617	8.22422	8.12985	8.18888	8.06232	7.92479	8.28162	8.04262	8.01134	8.07563	8.07273	7.92063	8.03667	8.01603	7.9166	7.80945	7.77947	8.02193	7.73407	7.55681	7.42706	7.17112	7.40243
ENSG00000002549	9.06923	8.9237	9.11591	9.07084	8.97571	9.04443	9.01168	9.07981	9.17361	9.22425	9.04052	9.1172	9.06418	9.26775	9.035	9.13999	8.9846	9.00889	8.92544	8.99776	8.85543	8.78271	8.72864
ENSG00000002586	11.4065	11.4746	11.4548	11.3906	11.4629	11.432	11.5626	11.4716	11.4384	11.5112	11.5345	11.437	11.4174	11.3989	11.4838	11.4957	11.4106	11.5232	11.4904	11.3412	11.1558	11.0944	10.9864
ENSG00000002822	8.09472	7.84175	8.05121	8.03925	8.0541	7.94514	7.96398	8.2712	7.9708	7.87926	7.95521	7.81366	8.057	8.1628	8.15058	8.22309	8.24693	8.21821	7.93053	8.13591	7.56183	7.69982	7.58969
ENSG00000002834	13.5181	13.5307	13.5649	13.5233	13.5057	13.4916	13.5097	13.551	13.5392	13.5255	13.5737	13.5366	13.5907	13.5904	13.5786	13.5761	13.5243	13.6233	13.5336	13.4934	13.4138	13.3523	13.3073
ENSG00000002919	8.33196	8.47569	8.30822	8.19601	8.28781	8.19215	8.42509	8.43886	8.2908	8.37041	8.40311	8.36304	8.385	8.4509	8.36468	8.25686	8.43963	8.55513	8.46934	8.47282	8.71754	8.71793	8.71923
ENSG00000002933	10.9639	11.0449	11.0232	11.0512	11.1839	11.207	11.2907	11.1112	11.0894	11.17	11.2092	11.015	11.003	11.0011	10.7886	10.9146	10.8539	10.85	10.7856	10.7938	10.5937	10.3998	10.4823
ENSG00000003056	10.3273	10.0726	10.1673	10.1191	10.0958	10.0013	10.0928	10.1228	10.1341	10.0651	10.0392	10.1017	10.1333	10.1834	10.3079	10.1399	10.2616	10.3654	10.2385	10.2611	10.737	10.7417	10.7819
ENSG00000003096	7.80053	7.96914	7.9053	8.18171	8.21649	8.06465	8.21998	8.23675	8.10155	8.00507	8.22367	8.23877	8.11234	8.12902	8.00684	7.98559	7.88385	7.62496	7.73407	7.70451	6.62598	6.56388	6.72477
ENSG00000003137	7.93745	7.51361	7.62006	7.32327	6.78835	6.62752	6.80251	7.07655	7.41458	6.84888	7.09385	7.45044	7.43213	7.30568	6.96177	7.15748	7.30528	7.25987	7.29917	7.28539	8.89637	8.90882	8.76795
ENSG00000003147	9.05346	8.85741	8.97958	8.95784	9.06504	9.11329	9.02676	9.04853	8.92453	9.02473	9.03237	8.97798	8.78911	8.98076	8.90358	8.90889	9.13601	9.03542	9.11075	9.19913	9.29372	9.2001	9.14867
ENSG00000003249	10.3364	10.278	10.3158	10.042	9.92144	9.96603	10.0194	10.1632	10.1153	9.96646	10.135	10.2142	10.2928	10.2553	10.1414	10.3456	10.3553	10.5649	10.4055	10.3484	10.5155	10.3638	10.3066
ENSG00000003393	9.99544	9.88388	10.019	9.93096	10.0487	10.0401	9.91464	9.96123	10.0071	9.94777	9.96251	9.9371	10.0073	9.93339	9.99949	9.87643	9.98787	9.9582	9.86957	10.0119	9.9347	9.95195	9.92405
ENSG00000003400	7.93745	8.03059	8.06985	8.2381	8.14659	8.33354	8.15559	8.20099	8.25194	8.03194	8.12482	7.86117	8.25271	8.05295	8.04993	8.10233	7.89055	7.99722	8.01029	7.9341	8.14942	8.05298	7.94474
ENSG00000003402	9.9908	9.9106	10.0227	9.7786	9.88663	9.83364	9.74533	9.86985	10.0293	9.67417	9.8046	9.94585	9.87543	9.85288	9.79792	9.75701	9.7924	9.67989	9.88986	9.90072	9.66783	9.77626	9.70819
ENSG00000003436	10.326	10.0596	10.1618	10.1994	10.0865	9.96913	9.91626	9.95204	10.202	9.97571	9.95101	10.1003	10.0818	10.2105	10.0789	10.0778	10.1206	10.2394	10.1366	10.1589	11.4907	11.6347	11.6222
ENSG00000003509	7.82303	8.25315	8.19612	8.07738	8.20179	8.19744	8.12789	8.45629	8.07952	8.20715	8.19472	8.18051	7.99729	8.08386	8.25322	8.05043	8.27023	8.31302	8.14614	8.43486	7.98201	7.81601	7.89129
ENSG00000003756	10.7417	10.8937	10.775	10.8601	10.7767	10.9089	10.8484	10.8271	10.7811	10.689	10.7408	10.7459	10.7437	10.6627	10.7722	10.7777	10.849	10.6794	10.9106	10.9526	10.4051	10.3719	10.3628
ENSG00000003987	5.17167	5.43978	5.30812	5.03693	5.62163	5.68791	5.50674	5.32309	5.37789	5.80015	5.89235	5.47498	4.96809	5.55496	5.10516	5.12864	5.52548	5.63075	5.14747	5.58656	5.84024	6.06085	5.9622
ENSG00000003989	10.858	11.0316	10.9893	11.126	11.2171	11.2024	11.2321	11.1378	11.0797	11.171	11.1035	11.1605	11.159	11.1319	11.2103	11.0971	11.0998	11.0434	11.0355	11.1	10.7041	10.6919	10.634
ENSG00000004059	10.3528	10.42	10.4063	10.3935	10.3613	10.4156	10.3756	10.382	10.3972	10.3671	10.462	10.2988	10.3609	10.326	10.3066	10.3552	10.2486	10.3525	10.2059	10.1956	10.1161	10.0584	10.0085
ENSG00000004139	9.34016	9.22148	9.3718	9.12575	9.21825	9.18449	9.27172	9.1995	9.27402	9.22064	9.41778	9.36808	9.2387	9.24473	9.22154	9.2515	9.18581	9.20504	9.13785	9.13827	8.52334	8.10912	8.16974
ENSG00000004142	11.1783	11.2476	11.2085	11.3049	11.4349	11.441	11.362	11.3125	11.2304	11.3128	11.3554	11.2756	11.2323	11.257	11.2035	11.212	11.2395	11.2242	11.1887	11.2148	10.9075	10.849	10.7723
ENSG00000004399	9.0343	8.99395	9.20443	8.79352	8.683	8.59663	8.61664	8.84515	8.80543	8.6674	8.57771	8.99651	8.86295	8.92495	8.67889	8.77779	8.72464	8.87967	8.80018	8.82948	10.2823	10.4235	10.2612
ENSG00000004455	10.115	10.1942	10.1691	10.1941	10.315	10.2054	10.2907	10.2329	10.2062	10.2603	10.3277	10.2077	10.1284	10.1583	10.2799	10.1484	10.1656	10.1595	10.1194	10.1177	10.1799	10.1861	10.1982
ENSG00000004468	3.00157	4.16687	2.6476	4.19863	3.46585	2.89786	3.69266	3.52973	3.96051	3.61661	3.57141	3.10575	1.59455	3.85002	3.84477	2.77102	2.69939	2.78337	3.20736	2.70834	1.98648	2.03367	2.36053
ENSG00000004478	10.1399	9.96131	10.0682	9.90724	9.86814	9.93149	10.0118	9.99294	10.0601	9.97801	9.86175	10.07	10.0312	10.1227	10.3015	10.1597	10.3073	10.4828	10.444	10.3049	10.7035	10.5606	10.5837
ENSG00000004487	10.3687	10.3521	10.4285	10.3252	10.3188	10.3362	10.3398	10.3694	10.4226	10.4104	10.4467	10.4364	10.4024	10.4036	10.4832	10.4231	10.3746	10.4513	10.4463	10.4679	10.2299	10.1932	10.0993
ENSG00000004534	10.2725	10.2914	10.3787	10.3669	10.3791	10.454	10.4702	10.3807	10.4268	10.393	10.4117	10.3223	10.3433	10.2371	10.4479	10.4302	10.5367	10.452	10.5577	10.5869	10.2768	10.2293	10.2514
ENSG00000004660	3.66462	3.24503	2.17339	3.0416	2.59085	2.40658	3.42774	3.06772	3.75348	3.9528	1.98892	3.43059	2.01078	2.94675	3.13716	2.9629	1.67722	2.92982	3.0854	3.0671	3.50708	3.56445	2.98051
ENSG00000004700	8.67481	8.63669	8.48473	8.65021	8.56163	8.47979	8.40214	8.67314	8.79195	8.63856	8.53984	8.59565	8.56507	8.85499	8.66312	8.59787	8.69051	8.60776	8.57226	8.59144	8.66849	8.94323	8.85856
ENSG00000004766	8.62446	8.49034	8.50229	8.35746	8.60695	8.7878	8.45214	8.45195	8.62328	8.53595	8.43647	8.60374	8.42371	8.56485	8.60652	8.59787	8.34528	8.62399	8.62246	8.74824	8.56507	8.63333	8.77477
ENSG00000004777	5.26228	5.39894	4.62633	5.1588	4.39904	4.49254	4.50405	4.82924	4.37648	4.45436	4.50942	4.70039	4.47314	4.03011	4.541	4.41891	4.52238	4.27719	4.18761	4.41261	3.50708	3.65584	4.39154
ENSG00000004779	8.61159	9.10286	8.80373	9.01545	9.16439	9.15199	9.1309	8.89715	9.03167	9.07295	9.07005	9.02087	9.04223	8.96424	9.17781	8.8218	9.06377	8.87742	8.91876	9.03121	8.8692	8.96126	8.93166
ENSG00000004799	4.01664	5.0224	4.46368	4.67783	5.46633	5.59466	5.36207	4.82924	4.91341	4.98091	5.07311	4.63878	4.71425	5.29805	3.84477	4.48295	4.29895	4.48101	4.35532	4.58888	3.50708	4.34627	3.31621
ENSG00000004838	2.17132	3.24503	1.46227	3.47608	3.00618	3.41682	2.41636	2.05824	3.75348	2.54308	3.6868	2.91102	3.18269	3.26713	3.9525	2.77102	2.10338	3.29673	2.45752	3.47881	2.79189	3.24941	3.58836
ENSG00000004864	10.4335	10.4885	10.3617	10.4378	10.4989	10.4778	10.4333	10.4629	10.494	10.3863	10.4761	10.5806	10.4931	10.484	10.549	10.3922	10.4871	10.4708	10.4471	10.4819	10.5199	10.4668	10.5092
ENSG00000004866	8.72346	8.45591	8.58617	8.6554	8.75524	8.85971	8.90475	8.67686	8.67076	8.81904	8.837	8.52504	8.72513	8.58299	8.37924	8.71917	8.58297	8.62399	8.648	8.69142	8.81803	8.83253	8.88405
ENSG00000004897	10.1782	10.0315	10.1518	10.2362	10.144	10.2724	10.3361	10.2706	10.2197	10.2481	10.3184	10.3185	10.3032	10.3086	10.2337	10.2042	10.4365	10.1176	10.1114	10.1294	10.1276	10.1457	10.1421
ENSG00000004961	8.3984	8.25315	8.40852	8.4499	8.51483	8.39013	8.56799	8.46923	8.48766	8.56689	8.3472	8.4145	8.33172	8.61861	8.53032	8.46939	8.56215	8.27926	8.34196	8.56357	8.57351	8.72586	8.54648
ENSG00000004975	9.66476	9.47857	9.46848	9.62482	9.4989	9.56844	9.56402	9.53441	9.5631	9.52772	9.70633	9.54844	9.58988	9.5259	9.46838	9.38803	9.55603	9.64089	9.43333	9.45571	9.42232	9.341	9.34952
ENSG00000005001	5.6789	5.62827	5.8809	5.98214	5.62163	6.08073	5.36207	5.46767	5.78423	5.52558	5.71341	5.36513	5.87209	5.15012	4.9578	5.84089	5.52548	5.95542	5.73917	5.83994	7.04547	7.16335	6.98239
ENSG00000005007	11.4487	11.4672	11.3794	11.352	11.3051	11.3659	11.3668	11.4258	11.3617	11.4936	11.4851	11.3388	11.4825	11.4112	11.376	11.418	11.4001	11.4332	11.382	11.3164	11.2662	11.2035	11.2488
ENSG00000005020	8.07504	7.8903	7.7315	7.86102	7.57688	7.81193	8.06501	8.00164	7.75754	7.75933	7.77318	7.75629	7.90911	7.96713	7.96243	7.83422	7.96858	7.91607	7.92396	8.02888	8.38181	8.47923	8.4011
ENSG00000005022	11.1075	11.144	11.114	11.111	11.3148	11.1911	11.2334	11.1546	11.1975	11.1507	11.2146	11.1258	11.1533	11.1738	11.2894	11.1262	11.1348	11.1805	11.1393	11.0462	11.135	11.0551	11.0563
ENSG00000005059	3.00157	2.21247	3.2894	3.47608	3.1762	3.90516	2.0887	2.38397	2.04324	3.61661	3.57141	2.68585	3.59813	4.46525	3.13716	3.13223	4.21606	2.92982	3.69828	3.35419	4.17276	5.09868	4.65102
ENSG00000005075	8.96517	8.96559	8.86128	8.94837	9.06111	9.00236	9.07154	9.04133	8.86589	8.91592	8.96115	8.89664	8.98607	8.85314	9.006	8.95374	8.965	8.86357	8.86949	8.92146	8.87625	8.8602	8.78689
ENSG00000005100	8.67893	8.56147	8.64197	8.43791	8.44167	8.43566	8.44767	8.54453	8.50429	8.48501	8.4282	8.49058	8.55348	8.62213	8.75526	8.68213	8.54527	8.71771	8.79045	8.70743	8.83919	8.88068	8.83044
ENSG00000005108	6.10331	5.91568	5.94396	5.91454	5.93768	5.38786	5.02024	5.95851	5.67093	5.92004	5.57049	6.09569	6.10161	6.53954	5.90788	5.95819	6.45656	5.93821	6.23131	6.24282	8.21202	8.48235	8.31317
ENSG00000005156	9.03108	9.11237	8.89964	8.80756	9.11557	9.06486	8.85493	8.87139	9.00854	9.02026	8.81814	8.80646	8.87231	8.92779	9.08024	9.02369	8.90745	8.98814	8.99484	9.03629	9.08132	9.01618	8.98169
ENSG00000005175	8.67481	8.70659	8.65774	8.62928	8.74513	8.65553	8.62062	8.63153	8.75768	8.81904	8.46907	8.75658	8.63271	8.86985	8.90693	8.79996	8.95934	8.6159	8.56942	8.79394	8.72514	8.57306	8.84997
ENSG00000005187	8.15998	8.46583	8.32806	8.43791	8.53842	8.75586	8.51765	8.6468	8.38362	8.18339	8.64703	8.23357	8.32265	8.33577	8.13814	8.19607	8.05459	7.88048	7.91951	7.90663	6.29958	6.04404	6.38736
ENSG00000005189	5.77436	6.44329	5.62275	6.22472	6.46641	6.38916	6.24478	6.07597	5.91438	6.40414	6.02983	6.38553	5.82146	6.2796	6.15342	6.22486	6.54412	5.71397	5.87421	5.71881	5.19189	4.77098	4.90445
ENSG00000005194	9.24893	9.15898	9.32186	9.34245	9.3469	9.53117	9.41384	9.36011	9.22218	9.22033	9.18	9.37035	9.37847	9.32494	9.13843	9.22437	9.31843	9.27865	9.32802	9.43855	9.34884	9.40989	9.32647
ENSG00000005206	10.3099	10.4702	10.3598	10.4676	10.4828	10.4359	10.5816	10.4024	10.3017	10.5077	10.5331	10.2876	10.4163	10.2337	10.2257	10.4201	10.2289	10.286	10.4602	10.3122	10.1323	10.0478	10.0085
ENSG00000005238	8.55446	8.52871	8.58376	8.5646	8.36018	8.48413	8.33589	8.28146	8.39259	8.65593	8.53984	8.27466	8.42371	8.33148	8.29987	8.3881	8.49781	8.59958	8.36508	8.44254	9.1048	9.01186	8.98758
ENSG00000005243	5.07499	5.26898	5.43062	4.83235	5.29228	5.93617	5.63822	5.16239	5.37789	4.90545	5.41182	5.20431	5.18388	4.98526	5.19564	5.31612	5.62522	5.26732	5.31964	4.88757	5.19189	5.5436	5.5389
ENSG00000005249	3.00157	3.24503	3.63345	4.40975	3.1762	4.18655	3.10297	4.07244	3.05032	3.41368	2.57265	3.10575	3.59813	3.11581	3.72834	3.13223	3.58383	3.18448	3.52142	3.47881	3.30569	2.84578	3.41275
ENSG00000005302	8.45712	8.32031	8.33592	8.35108	8.39936	8.47979	8.28664	8.37611	8.3564	8.29109	8.43234	8.38196	8.3497	8.35702	8.41263	8.33703	8.4073	8.2447	8.23846	8.33947	8.22279	8.11468	8.13715
ENSG00000005339	10.9823	10.9314	10.993	11.063	10.8697	10.9083	10.9284	10.9544	10.9932	10.8943	10.864	10.8875	10.9099	10.8896	10.7914	10.8689	10.8148	10.9031	10.826	10.9351	10.6951	10.7107	10.6439
ENSG00000005379	6.3297	6.46324	6.22356	6.79386	6.34682	6.62752	6.30538	6.50253	6.58032	6.22948	6.75353	6.28856	6.87221	6.26169	6.76893	6.14793	6.40136	6.343	6.4815	6.07528	4.82806	4.10818	4.72808
ENSG00000005421	6.57921	6.96092	6.8794	7.09803	7.32894	7.15958	7.02305	7.00726	6.70066	6.98341	6.91607	7.01409	6.44045	6.68103	6.82671	6.86477	6.98062	6.23444	6.24562	6.32813	4.5373	4.88868	5.0315
ENSG00000005436	8.72745	8.95221	8.88632	8.84889	9.04596	9.01474	9.03275	8.96572	9.06289	9.07725	8.91006	8.98108	9.12024	9.04238	9.05629	9.02638	9.08728	8.98395	9.1088	9.14138	8.59301	8.64173	8.63168
ENSG00000005448	4.21116	4.16687	4.21367	4.30805	2.59085	3.55525	3.10297	4.07244	4.51424	3.61661	2.79469	2.68585	3.82069	4.03011	3.46282	4.04751	4.29895	3.97374	3.20736	3.59351	4.34038	4.92588	4.87086
ENSG00000005469	9.68538	9.69013	9.62581	9.81061	9.73327	9.57456	9.81219	9.85677	9.86949	9.78096	9.73007	9.69374	9.61796	9.73995	9.64537	9.59782	9.73601	9.52756	9.56181	9.56518	8.49276	8.24915	8.19937
ENSG00000005471	7.00366	6.98872	6.73019	6.95395	7.20668	7.12664	7.25585	7.10999	7.01007	6.90808	7.15524	7.05003	7.1306	7.26517	7.15266	6.99039	7.15763	7.1066	6.96057	6.79169	7.28355	7.35279	7.26048
ENSG00000005483	9.8294	9.80205	9.65438	9.73914	9.75859	9.75957	9.73901	9.76004	9.74205	9.75701	9.72838	9.75491	9.74226	9.66697	9.617	9.66838	9.67718	9.42323	9.56609	9.5999	9.5114	9.46304	9.49442
ENSG00000005486	9.99379	9.9718	9.99562	9.85185	9.95396	10.0178	9.88681	10.1064	10.0231	9.89021	9.9539	10.0597	9.99734	9.94186	9.93692	9.89273	10.0279	9.94749	9.91503	9.98325	10.1237	10.0791	10.1074
ENSG00000005700	10.8268	10.8551	10.8384	10.879	10.8805	10.9212	10.9139	10.8585	10.9114	10.9113	10.8479	10.9372	10.931	10.9628	10.8963	10.8448	10.9363	10.8157	10.8757	10.8711	11.1951	11.2947	11.2767
ENSG00000005801	9.4694	9.47857	9.46311	9.3774	9.47669	9.46025	9.39072	9.4057	9.5249	9.38221	9.48707	9.52095	9.31354	9.40463	9.54137	9.64582	9.74712	9.71726	9.91839	9.94325	10.2281	10.2196	10.2083
ENSG00000005810	9.79377	9.65587	9.6465	9.74401	9.63458	9.65374	9.73901	9.6695	9.78182	9.65989	9.55129	9.82401	9.62167	9.89904	9.69081	9.75036	9.69451	9.66201	9.72132	9.74966	9.52597	9.67585	9.68406
ENSG00000005812	9.07861	8.9273	9.0216	8.99514	8.98718	9.09638	8.97173	9.19595	9.11526	8.95626	9.19956	9.12564	9.05599	9.14121	8.99146	9.14247	9.15003	8.90646	8.9053	9.05393	8.60952	8.62204	8.93166
ENSG00000005844	7.39267	7.30837	7.14398	7.71964	7.83358	7.78404	7.73124	7.63133	7.53279	7.6595	7.72675	7.50326	7.20408	7.34874	7.22072	7.2432	7.07772	7.02747	6.5864	6.81552	5.40863	5.51947	5.4045
ENSG00000005882	7.80053	7.93383	8.01217	7.86997	8.12597	8.0235	8.04145	8.04262	7.812	7.99601	7.94528	8.0085	7.8535	7.95603	7.87613	7.95769	7.86357	7.48388	7.4734	7.4236	6.24427	5.86413	6.12777
ENSG00000005884	8.01767	7.46497	7.87326	7.71964	7.47462	7.55569	7.45626	7.44301	7.57276	7.44973	7.41993	7.52896	7.43213	7.4707	7.6061	7.29763	7.51052	7.53627	7.10096	7.39225	9.25577	9.36489	9.23537
ENSG00000005889	10.0281	10.0011	10.0516	10.0656	10.0799	10.1301	10.0986	10.0181	10.1408	10.0542	10.0446	10.1439	10.056	10.1798	10.061	9.94766	10.0742	9.90827	10.0186	10.1235	9.92814	10.0822	9.99885
ENSG00000005893	11.6346	11.5691	11.5428	11.6228	11.6918	11.6217	11.5908	11.6002	11.6507	11.5992	11.5791	11.6901	11.6129	11.7604	11.6684	11.609	11.6932	11.6295	11.53	11.5159	11.7129	11.7821	11.7852
ENSG00000005961	2.17132	3.24503	2.17339	1.96111	2.0053	1.05348	2.41636	1.63684	2.85667	2.89487	1.98892	2.41891	2.33342	0.969813	2.71588	2.54965	2.69939	3.40087	2.45752	2.22973	3.50708	2.68152	1.90961
ENSG00000006007	10.3403	10.2681	10.2857	10.3794	10.2526	10.3302	10.1709	10.3497	10.3473	10.2614	10.2936	10.197	10.2835	10.2302	10.1598	10.2522	10.3297	10.2261	10.1182	10.1956	10.6143	10.6892	10.6189
ENSG00000006015	8.65822	8.86118	8.99703	8.91524	8.81117	8.74143	8.90475	8.78777	8.73319	8.86459	8.86176	8.62772	8.90914	8.69735	8.70993	8.85545	8.72838	9.02324	8.99272	8.80291	8.68935	8.50095	8.55444
ENSG00000006025	6.96372	7.26357	7.21388	6.98723	6.92586	6.91151	7.12746	6.97133	6.75727	6.90808	7.31622	6.80562	7.06953	6.91675	7.13184	7.22458	6.98062	7.02747	7.16258	7.03439	6.98771	7.36638	7.27339
ENSG00000006042	9.07236	9.40565	9.22573	9.30004	9.30854	9.33611	9.37195	9.24693	9.22218	9.33266	9.43025	9.37508	9.33175	9.28337	9.41993	9.23136	9.37922	9.17965	9.22166	9.22828	8.70988	8.74679	8.6516
ENSG00000006047	5.02411	4.8513	4.86228	4.83235	5.49876	5.68791	4.81321	5.28456	5.44835	4.74153	5.11492	5.02328	5.18388	4.79911	4.60844	4.95886	4.52238	4.33091	4.30156	4.28186	2.6287	4.04197	3.50322
ENSG00000006062	7.51749	7.10755	7.42017	7.18667	7.16688	7.42635	7.01097	7.04232	7.23689	7.21984	7.22372	7.25898	7.18418	7.4707	7.16581	7.2887	7.41155	7.41093	7.28539	7.46939	8.20117	8.25647	7.99627
ENSG00000006116	3.5252	2.81922	3.41343	2.76282	3.46585	2.89786	3.80886	2.87372	2.36801	2.07686	3.15679	1.66623	2.81967	1.95448	2.44783	3.13223	2.43195	3.06276	2.24608	2.22973	1.98648	1.73155	2.15262
ENSG00000006118	9.49765	9.40054	9.48801	9.23224	9.13633	9.02669	9.14202	9.43458	9.24463	9.22425	9.26136	9.15894	9.08847	9.39028	9.15544	9.28401	9.1913	9.41392	9.36453	9.39966	9.88471	9.61737	9.51224
ENSG00000006125	11.3953	11.3388	11.4085	11.3592	11.3956	11.4404	11.3549	11.3843	11.345	11.3718	11.3339	11.4909	11.3647	11.3979	11.3486	11.3712	11.3877	11.3425	11.2771	11.2868	11.6492	11.7344	11.6779
ENSG00000006194	8.9345	8.98708	9.0216	9.10914	8.89579	8.88619	9.00561	9.05141	8.9791	9.11124	9.06739	9.13125	8.97143	8.98895	9.21885	9.13501	9.06081	9.10066	9.09701	9.24592	9.11448	9.24494	9.14165
ENSG00000006210	8.75501	8.95925	9.00691	9.11668	8.83359	9.04443	9.12251	9.08542	9.0288	8.99318	9.05402	8.81693	8.96269	8.7172	8.61474	8.73569	8.47125	8.23416	8.32522	8.27647	6.97077	6.927	6.7527
ENSG00000006282	9.92438	9.85586	10.0348	9.93096	9.80633	9.82604	9.94194	9.88923	9.86466	9.82258	9.95246	9.74398	9.76253	9.80013	9.81018	9.85238	9.84174	9.82414	9.93614	9.83666	9.48032	9.28306	9.26799
ENSG00000006327	11.7599	11.7691	11.8206	11.5418	11.369	11.3506	11.422	11.5639	11.5183	11.5559	11.6537	11.606	11.6952	11.7154	11.643	11.696	11.644	11.8335	11.7542	11.6228	12.2418	12.1918	12.216
ENSG00000006432	9.53675	9.3797	9.38003	9.38366	9.22137	9.24698	9.15581	9.25443	9.32172	9.21256	9.27986	9.24932	9.30435	9.2767	9.28732	9.10734	9.20748	9.31909	9.3678	9.36576	9.87678	10.0159	9.88357
ENSG00000006451	9.6606	9.58924	9.48094	9.532	9.55972	9.6324	9.53479	9.5033	9.55315	9.61322	9.53018	9.52734	9.60492	9.56659	9.57125	9.614	9.70024	9.37129	9.45504	9.3718	9.685	9.70956	9.8354
ENSG00000006453	11.3049	11.2001	11.2595	11.1344	10.9474	11.0837	11.0004	11.1666	11.2466	11.1579	11.0694	11.1584	11.1196	11.1846	11.1697	11.1803	11.2375	11.3576	11.3501	11.334	11.5688	11.5531	11.5104
ENSG00000006459	8.4133	8.24165	8.29215	8.2381	8.30166	8.3855	8.35035	8.24179	8.12862	8.25354	8.30267	8.34868	8.40233	8.24752	8.31508	8.37127	8.15257	8.323	8.24203	8.4194	8.24762	8.62204	8.61403
ENSG00000006468	4.7387	4.51148	4.34409	4.50476	3.00618	4.26934	4.11005	5.11926	4.75565	4.09546	3.30863	4.36209	4.5373	4.33426	4.67286	4.35189	3.9343	4.03975	4.24571	3.97836	6.18676	6.02702	6.05486
ENSG00000006530	8.9919	8.95221	8.73704	8.82147	8.87432	8.86305	8.83793	8.79806	8.69747	8.76135	8.86483	8.79592	8.83769	8.90489	8.68671	8.63005	8.73212	8.78662	8.75589	8.94201	8.64732	8.69925	8.58065
ENSG00000006534	6.63114	6.74977	6.94253	6.84922	6.49883	6.46137	6.87095	7.05382	7.06816	6.65515	7.02972	6.32814	6.71466	6.87023	6.81248	6.60181	6.73483	6.64821	6.14235	6.48496	5.66178	5.09868	5.17603
ENSG00000006555	4.21116	4.51148	4.94683	4.50476	4.32864	4.49254	4.81321	4.53315	4.37648	4.45436	4.5708	5.07071	4.01346	3.75078	4.05274	4.714	4.03446	4.85558	4.64161	4.58888	4.34038	4.55058	4.61088
ENSG00000006576	7.56276	7.44505	7.48522	7.60639	7.22618	7.3332	7.28624	7.57657	7.72952	7.43638	7.27993	7.11934	7.23343	7.46288	7.29423	6.90038	7.30528	7.41715	7.19243	7.31912	7.81175	7.91182	7.94877
ENSG00000006607	8.76279	8.55683	8.6388	8.70626	8.65809	8.53939	8.77146	8.63918	8.85166	8.573	8.63989	8.77817	8.76587	8.77832	8.69061	8.78734	8.70957	8.85238	8.88031	8.94742	8.69451	8.55833	8.55444
ENSG00000006611	7.04253	7.19365	7.03233	7.17227	7.36457	7.28427	7.46514	7.10999	7.39687	7.36775	7.36034	7.07351	7.31805	7.234	7.10873	7.3924	7.35456	7.18891	7.41763	7.36021	6.44158	6.17338	6.05486
ENSG00000006625	8.03339	8.03719	7.8616	7.9427	8.06773	8.16537	7.99982	8.22143	8.07952	8.04078	8.23186	8.23148	7.96056	7.98361	8.07034	8.02377	7.96224	8.07011	8.0522	8.09852	7.93445	8.02326	7.97655
ENSG00000006634	7.07364	6.57728	7.14039	7.21209	7.19654	6.96055	6.89336	7.00454	7.14293	6.94114	6.93323	7.04494	7.01424	7.16494	7.25184	7.02758	7.4895	7.13934	7.10489	7.10513	7.16056	7.20887	7.39305
ENSG00000006652	9.63752	9.73389	9.57857	9.57369	9.5731	9.56434	9.63067	9.56688	9.57299	9.69112	9.73678	9.70506	9.71304	9.59011	9.72349	9.75847	9.91419	9.90385	10.0567	10.04	10.3802	10.3781	10.5194
ENSG00000006695	8.29949	8.38996	8.42298	8.5165	8.58239	8.34026	8.57941	8.57255	8.49146	8.51115	8.63278	8.23107	8.33041	8.59656	8.54791	8.36398	8.34391	8.42798	8.51237	8.55248	8.62847	8.58845	8.54919
ENSG00000006704	8.2402	7.96215	8.33983	8.0061	7.93777	8.03538	7.94315	8.14295	7.93978	7.98688	8.25673	8.05051	8.17921	8.12407	8.15515	8.02914	8.11874	8.25515	8.4571	8.19706	8.81091	8.76999	8.69304
ENSG00000006712	9.37103	9.35856	9.31392	9.2934	9.18447	9.25463	9.37431	9.30824	9.43015	9.38916	9.26601	9.25189	9.33626	9.40259	9.28989	9.37543	9.36005	9.41703	9.33807	9.22606	9.6654	9.69752	9.69969
ENSG00000006715	9.94675	10.0315	9.97564	9.8631	9.87433	10.0043	9.95933	10.0457	10.0303	9.96877	9.99506	10.0612	10.0656	10.0632	10.0413	10.0357	10.099	9.96671	9.9284	9.98588	10.0338	10.0677	10.1351
ENSG00000006740	7.12935	7.21734	7.08923	7.15772	7.13629	6.89856	7.27619	6.94686	6.90237	6.86888	7.13507	7.09661	7.00293	7.07897	7.04931	7.12774	7.26462	7.4898	7.43646	7.46186	7.68247	7.85027	7.89964
ENSG00000006744	10.3168	10.336	10.2775	10.203	10.2347	10.1964	10.3434	10.3321	10.268	10.2858	10.3026	10.3308	10.2029	10.342	10.2391	10.2313	10.3334	10.2818	10.2659	10.16	10.1218	10.1017	10.0448
ENSG00000006756	10.5683	10.5747	10.6169	10.6066	10.6153	10.6403	10.5433	10.6789	10.6215	10.564	10.5379	10.7766	10.7592	10.7383	10.8465	10.6939	10.8726	10.8791	10.7414	10.8388	10.648	10.6446	10.6296
ENSG00000006757	8.59861	8.46583	8.56382	8.78408	8.82082	8.74505	8.78571	8.72441	8.73671	8.75599	8.68915	8.60374	8.69732	8.704	8.69837	8.55754	8.73584	8.49463	8.48148	8.65556	8.22637	8.34494	8.10862
ENSG00000006831	10.2084	10.2221	10.2724	10.4028	10.2467	10.301	10.2907	10.2051	10.2789	10.3116	10.1664	10.261	10.1893	10.2093	10.1931	10.1548	10.2551	10.1683	10.0957	10.1472	10.4498	10.345	10.3794
ENSG00000006837	3.36923	3.41689	2.8838	4.19863	3.73008	3.99451	3.66085	3.73226	4.277	3.95729	3.79363	3.7136	3.17142	5.23666	4.49327	4.13303	4.65353	3.46474	2.73082	4.67425	3.13008	2.55619	3.39679
ENSG00000007001	2.17132	3.24503	3.52763	3.65243	3.81391	4.18655	3.56627	3.06772	3.37366	2.89487	3.79363	3.91933	3.33486	3.11581	2.44783	3.28375	1.67722	1.6811	1.99824	2.22973	0.799644	0.826693	0.756398
ENSG00000007047	9.3271	9.50527	9.34541	9.27667	9.16944	9.2134	9.26411	9.2594	9.26916	9.24353	9.3711	9.17259	9.2858	9.22217	9.16946	9.39221	9.34061	9.3904	9.35631	9.33518	9.45618	9.39505	9.4382
ENSG00000007062	10.4298	10.2147	10.3462	9.95008	10.0336	9.76136	9.66385	10.0342	10.1501	9.85052	9.85559	10.0435	10.0737	10.3227	9.95646	9.88682	10.1206	10.0106	9.92618	9.93919	10.3551	10.3182	10.3369
ENSG00000007080	9.21814	9.34518	9.18062	9.22529	8.78512	8.74143	9.07398	9.04566	8.99095	9.30356	9.31167	8.94336	9.22865	8.94192	8.99776	9.15235	8.84331	9.31075	9.18872	8.82068	9.60493	9.27767	9.30776
ENSG00000007168	11.0605	10.9465	11.0529	10.9661	10.9207	11.0965	11.0732	10.9513	10.9717	11.0945	11.0312	11.059	11.0912	11.0501	11.1214	11.025	11.058	11.0261	11.0453	11.0034	11.1875	11.2044	11.1976
ENSG00000007202	11.5296	11.5488	11.5201	11.6115	11.6287	11.5868	11.5872	11.6177	11.6105	11.562	11.5316	11.6196	11.5979	11.5514	11.516	11.5373	11.5838	11.5801	11.5113	11.5146	11.6314	11.6556	11.6706
ENSG00000007237	5.54092	4.65714	5.51611	4.83235	4.8648	4.90879	4.92043	4.93253	5.75673	5.12095	5.03006	5.24623	5.26191	5.58408	5.39977	4.714	4.88633	5.3214	5.23612	4.84189	5.45808	5.80547	5.58106
ENSG00000007255	7.56276	7.72664	7.42755	7.66926	7.56926	7.52232	7.52583	7.71339	7.49167	7.43638	7.68573	7.47709	7.65814	7.50916	7.30444	7.44961	7.34484	7.36016	7.47947	7.3357	7.1165	6.981	7.11742
ENSG00000007314	4.46115	5.0752	4.57412	4.67783	4.53031	4.55988	4.86782	4.71799	5.18505	3.79447	5.57049	5.11663	4.76871	4.79911	3.46282	5.38479	4.88633	4.99521	5.49756	4.97481	5.84024	5.59068	5.42778
ENSG00000007341	7.36227	7.33026	7.28867	7.17227	7.48275	7.17039	6.99879	7.31505	7.3699	6.88862	7.41157	7.21743	7.3362	7.3572	7.42156	7.3924	7.43922	7.31422	7.22889	7.18834	7.28355	7.58559	7.52086
ENSG00000007376	8.5767	8.3897	8.48473	8.47358	8.21649	8.24425	8.41136	8.40782	8.36553	8.43221	8.46907	8.52504	8.35416	8.35702	8.30496	8.28408	8.09574	8.56917	8.37488	8.24611	8.88737	8.57013	8.78608
ENSG00000007384	9.83679	9.82343	9.83159	9.81525	9.6051	9.60277	9.63658	9.69359	9.7473	9.66848	9.63987	9.59176	9.66539	9.46459	9.58806	9.67182	9.52839	9.58257	9.67978	9.59647	9.60356	9.76192	9.593
ENSG00000007392	9.09411	9.22473	9.05769	9.13164	9.03771	9.11609	9.05056	9.09936	9.09069	9.11124	9.18246	9.15345	9.13327	9.05023	9.3843	9.28177	9.24977	9.22823	9.38729	9.39374	8.94271	8.81281	8.99149
ENSG00000007402	3.5252	3.71322	4.90517	3.95122	4.81416	4.00518	3.27447	4.07244	4.44701	3.61661	3.57141	4.2009	3.92029	4.26402	3.13716	4.2816	3.11992	3.67459	2.64189	3.35419	2.79189	1.34893	2.36053
ENSG00000007516	6.82196	7.06902	7.04197	7.08272	7.12595	7.30404	7.30616	7.17462	7.0227	7.28083	7.22372	7.01409	7.20408	7.07897	7.17696	7.36716	6.84927	6.66921	6.78558	7.10378	6.54819	6.11016	6.14192
ENSG00000007520	9.55479	9.68801	9.61132	9.63009	9.48278	9.56639	9.57637	9.5303	9.56905	9.60728	9.58329	9.46436	9.57276	9.5146	9.5649	9.62823	9.49142	9.75828	9.546	9.61695	9.94341	9.69348	9.6973
ENSG00000007541	9.09103	9.02448	9.10512	8.88629	8.79168	8.8697	8.89821	8.94975	8.94955	8.96092	9.17026	8.99344	9.05284	8.95457	8.91714	9.11547	8.90894	9.02731	9.08534	8.94747	9.0833	8.97463	8.92723
ENSG00000007545	9.16094	9.30802	9.11138	9.16983	8.94847	9.12487	9.0396	9.08872	9.21651	9.0883	9.17155	9.15463	9.1161	9.05463	9.09468	9.199	9.1152	9.17639	9.26038	9.31561	9.19899	9.18449	9.13158
ENSG00000007866	9.42596	9.39536	9.43412	9.28338	9.23827	9.2029	9.15031	9.36011	9.2297	9.26256	9.34718	9.25189	9.22865	9.30321	9.29246	9.37754	9.23406	9.24407	9.44887	9.32484	9.18777	9.08562	9.2999
ENSG00000007923	10.0265	9.90409	9.82463	9.99781	9.98719	9.97068	9.90324	10.04	9.90123	9.91447	9.95533	10.0028	9.91973	9.85343	9.9402	10.0437	9.83307	9.90606	9.99977	10.0713	9.96602	9.87202	9.96044
ENSG00000007944	5.57667	5.82609	5.85925	5.73024	5.65077	5.59466	5.50674	5.43286	5.88927	4.98091	5.44498	5.20431	5.59902	5.58408	4.47026	5.60224	4.98975	4.85558	4.50556	5.34597	3.98308	4.17149	4.80123
ENSG00000008018	10.565	10.4995	10.4585	10.4074	10.5316	10.5583	10.5349	10.4554	10.4741	10.3846	10.5503	10.4387	10.3937	10.5221	10.5629	10.4683	10.5166	10.6138	10.5623	10.4632	10.7851	10.7371	10.8154
ENSG00000008056	3.198	3.71322	3.63345	4.08022	3.32828	2.67303	2.9083	3.06772	3.96051	3.17748	3.15679	3.56915	2.81967	2.75521	2.44783	2.9629	2.43195	2.62035	3.9978	4.06043	3.84118	3.56445	3.74489
ENSG00000008083	8.60727	8.57985	8.64197	8.78408	8.73496	8.54771	8.69801	8.51987	8.69022	8.71237	8.54367	8.56286	8.67253	8.42297	8.43138	8.53506	8.53248	8.30968	8.48148	8.4155	8.31962	8.56719	8.38036
ENSG00000008086	8.15998	8.30933	8.21754	8.21018	8.09979	8.14359	8.12789	7.98372	8.09608	8.19135	8.17014	8.21785	7.98008	8.16319	8.02546	8.01838	8.30072	7.80657	8.11141	7.9341	7.68766	7.79607	7.73203
ENSG00000008128	8.56874	8.4306	8.44883	8.3988	8.55844	8.44326	8.46433	8.57015	8.64463	8.43094	8.63375	8.62633	8.372	8.34047	8.57366	8.36151	8.61608	8.47377	8.68626	8.75596	8.41744	8.47741	8.47933
ENSG00000008130	10.4138	10.6087	10.4477	10.4543	10.3602	10.4007	10.479	10.5013	10.5003	10.4706	10.464	10.5274	10.5102	10.4036	10.5088	10.5064	10.4727	10.6353	10.5508	10.5625	10.4236	10.2738	10.3277
ENSG00000008226	4.21116	4.34944	4.57412	4.59389	4.65063	4.00518	4.3591	3.77179	3.75348	5.12095	4.62966	4.92347	4.76871	3.64421	4.14647	3.54607	3.58383	5.12252	4.88038	3.97836	2.93848	2.99323	3.74489
ENSG00000008256	8.34757	8.16455	8.15228	7.97326	7.88967	7.87278	7.9746	7.80471	7.72952	7.70472	8.04597	7.97149	7.88466	8.02667	8.05598	7.85857	7.86357	7.89393	7.82739	7.86727	7.89041	7.97528	7.88289
ENSG00000008277	5.46664	5.62827	5.40095	5.03693	6.15671	5.00857	5.69972	4.82924	5.54797	4.98091	5.07311	5.24623	5.1014	5.02828	4.90514	5.24403	5.2199	4.81845	4.88038	5.1723	4.34038	4.85051	4.52711
ENSG00000008282	10.2887	10.3292	10.3394	10.3381	10.3951	10.341	10.3554	10.4694	10.4378	10.4104	10.3635	10.4056	10.3486	10.4596	10.4	10.418	10.5101	10.4206	10.3927	10.4726	10.3929	10.4652	10.5562
ENSG00000008283	7.88137	7.95512	7.88402	7.85202	7.80793	7.89902	8.26136	7.9348	7.92132	8.01408	8.02419	7.74171	7.84084	7.92222	7.9166	7.85252	7.75765	7.85779	7.54456	7.72353	7.54619	7.72399	7.77353
ENSG00000008294	10.6649	10.6165	10.73	10.641	10.7273	10.6528	10.7564	10.6705	10.7093	10.788	10.6514	10.6738	10.7329	10.6964	10.6565	10.7857	10.6519	10.7227	10.7689	10.8139	11.0828	11.3259	11.2887
ENSG00000008300	8.36301	8.18271	8.36693	8.43791	8.19686	8.28462	8.26645	8.36692	8.18129	8.39131	8.21888	8.1642	8.19422	8.05295	7.99429	8.27507	8.03659	8.07011	8.28768	8.18339	8.08398	8.20444	8.0347
ENSG00000008311	9.14858	9.38755	9.20871	9.36162	9.44584	9.79668	9.73901	9.5033	9.47725	9.49913	9.74844	9.51668	9.47582	9.25875	9.53272	9.49867	9.37922	9.1924	9.53876	9.42699	8.20117	8.10255	8.32562
ENSG00000008323	9.44059	9.60515	9.54337	9.65878	9.61623	9.80364	9.69627	9.58086	9.73149	9.78096	9.85096	9.74215	9.75749	9.68557	9.66332	9.71078	9.77272	9.78258	9.75171	9.77419	8.48084	8.21575	8.35932
ENSG00000008324	6.59673	6.66619	6.67152	6.88498	6.69349	6.83202	6.59157	6.48565	6.62663	6.94624	6.74024	6.61081	6.61412	6.7975	6.6619	6.79079	6.61053	6.76013	6.52906	6.62639	6.85554	6.89921	6.98239
ENSG00000008382	7.88137	8.24741	8.1831	8.11551	8.11032	8.14359	8.13904	8.23675	8.11244	8.20715	8.32511	8.05051	8.13843	8.21995	8.17197	8.07142	7.98745	8.20569	8.06376	8.07897	7.35709	7.50186	7.56879
ENSG00000008394	11.6488	11.684	11.5998	11.7458	11.9725	12.0697	11.9809	11.8445	11.9323	11.9224	12.0048	11.9821	11.9362	11.9386	11.9106	11.8831	11.9592	12.0685	11.9537	12.0011	12.0959	12.1189	12.0659
ENSG00000008405	8.4133	8.21836	8.5368	8.31876	8.31082	8.24425	8.05916	8.25679	8.31928	8.15922	8.25205	8.13661	8.12283	8.37379	8.26894	8.24767	8.19106	8.30298	8.03933	8.06909	8.09575	8.08211	7.95279
ENSG00000008441	7.77768	7.77532	7.67686	7.48347	7.65808	7.65911	7.60833	7.6466	7.53279	7.64797	7.82448	7.651	7.70079	7.51674	7.49467	7.47345	7.61127	7.47794	7.4113	7.43903	7.66151	7.53834	7.39062
ENSG00000008513	11.187	11.1308	11.0932	11.1647	11.211	11.3132	11.3507	11.1626	11.1963	11.2302	11.2741	11.2378	11.2171	11.1618	11.1243	11.0817	11.0027	10.9235	10.916	10.8937	11.2159	11.3767	11.2549
ENSG00000008516	4.7387	5.0224	4.98731	4.90382	5.17679	4.62421	5.24317	3.97901	4.51424	5.05263	4.98568	4.50706	5.40633	4.46525	4.85048	4.04751	4.58977	4.96155	4.59767	4.64316	5.40863	5.25299	5.60168
ENSG00000008517	12.4936	12.6294	12.5634	12.3969	12.458	12.5467	12.5551	12.4283	12.4127	12.4164	12.5432	12.5074	12.5172	12.4069	12.5275	12.5179	12.4604	12.6872	12.5714	12.5376	13.0608	13.0004	12.8957
ENSG00000008710	10.395	10.5459	10.454	10.5089	10.3066	10.3064	10.4488	10.3806	10.3622	10.5693	10.4527	10.449	10.5145	10.2433	10.35	10.4654	10.2795	10.5006	10.522	10.5038	10.451	10.4548	10.3371
ENSG00000008735	6.10331	6.46324	6.04331	6.50307	5.73485	5.88457	6.73066	6.30496	6.20633	6.16622	6.17524	6.45867	6.35403	6.24355	6.3034	6.51257	6.04098	6.59431	6.38139	6.49974	6.98771	7.12388	6.81585
ENSG00000008838	10.1577	10.1095	10.2171	10.2101	10.0528	10.1951	10.1435	10.1921	10.1619	10.1266	10.2764	10.1117	10.1333	10.0502	9.97574	10.0608	10.0355	10.0391	10.0536	9.9324	10.0257	10.0447	9.93527
ENSG00000008853	9.27092	9.51963	9.41012	9.54044	9.54038	9.51854	9.5369	9.40794	9.41923	9.52142	9.48707	9.40315	9.49614	9.33568	9.51306	9.39845	9.44212	9.39198	9.42707	9.36778	9.53895	9.57117	9.42234
ENSG00000008869	9.43816	9.45635	9.28174	9.4538	9.35799	9.21078	9.3092	9.44335	9.39936	9.23585	9.16763	9.41698	9.39371	9.29882	9.37707	9.2453	9.40985	9.20324	9.20529	9.28699	9.32571	9.22829	9.30462
ENSG00000008952	10.7806	10.7371	10.8063	10.8005	10.824	10.8439	10.7806	10.832	10.8047	10.7386	10.7165	10.9097	10.7834	10.8786	10.9038	10.8956	10.9077	10.7727	10.8194	10.8902	10.9334	11.0934	11.0535
ENSG00000008988	11.8313	11.8646	11.8978	11.8451	11.884	11.806	11.8867	11.8804	11.7765	11.7928	11.8407	11.7525	11.6941	11.8288	11.8625	11.8379	11.8111	11.8529	11.7759	11.6963	12.0126	11.9794	12.0583
ENSG00000009307	12.72	12.7401	12.6945	12.7173	12.7642	12.8167	12.7937	12.75	12.7785	12.6733	12.7694	12.7898	12.7674	12.8165	12.7882	12.7432	12.8262	12.8098	12.7219	12.7521	12.9811	13.0361	13.0039
ENSG00000009335	10.6045	10.5644	10.6337	10.4572	10.5433	10.6403	10.4735	10.6201	10.4804	10.6226	10.5767	10.5621	10.6859	10.6447	10.5415	10.5141	10.6469	10.5913	10.592	10.5448	10.5409	10.4964	10.5661
ENSG00000009413	9.71375	9.6141	9.71741	9.71946	9.82883	9.76849	9.80522	9.7064	9.67568	9.79932	9.76331	9.83263	9.74056	9.80168	9.89871	9.74547	9.70215	9.63956	9.66655	9.7057	9.22396	9.341	9.31559
ENSG00000009694	5.83466	6.29536	5.96439	6.71658	6.05135	6.46137	6.52517	6.28558	6.49967	6.678	6.44481	6.16289	6.0365	5.89418	5.67608	5.86513	6.08836	5.65201	5.75925	5.66735	3.4099	3.89967	4.34337
ENSG00000009724	9.01814	9.05108	8.70705	8.9452	8.88356	9.23416	9.23064	8.91303	8.91212	8.98861	9.27295	8.82387	8.96269	8.82176	8.78471	8.87647	8.90745	8.89313	8.80018	8.68173	8.38181	8.10255	8.28794
ENSG00000009765	8.38837	8.55218	8.33983	8.77458	8.77191	8.90896	8.85155	8.53225	8.47083	8.49148	8.63271	8.61578	8.50617	8.47053	8.47268	8.34566	8.42587	8.07799	8.23846	8.20159	6.14207	6.17338	6.02463
ENSG00000009780	6.69759	6.64887	6.75596	6.79386	6.82718	7.08153	6.54206	6.67628	6.83822	6.74448	6.99656	6.64255	6.61412	6.80988	6.58028	6.81587	6.28418	6.41404	6.49354	6.97215	6.2583	6.55204	6.42257
ENSG00000009830	9.33234	9.2218	9.15642	9.17922	9.00705	9.17901	9.17488	9.2594	9.18913	9.19286	9.04052	9.26215	9.27408	9.15097	9.25086	9.21733	9.31346	9.46136	9.42864	9.43085	10.0267	10.0478	10.0523
ENSG00000009844	9.57481	9.60291	9.54676	9.62482	9.70749	9.49507	9.6811	9.66763	9.60996	9.52457	9.50093	9.8066	9.54181	9.67376	9.61495	9.60683	9.62593	9.7223	9.51533	9.53679	9.65483	9.6813	9.58913
ENSG00000009950	10.7806	11.0399	10.961	11.0384	11.2692	11.3434	11.3703	11.0615	11.0439	11.2292	11.363	11.0346	11.0284	10.6438	10.7245	10.937	10.7202	10.5445	10.723	10.7136	9.49224	9.07531	9.25177
ENSG00000009954	10.4249	10.3238	10.494	10.4348	10.4614	10.3973	10.3885	10.4324	10.5157	10.3881	10.384	10.4533	10.4789	10.5399	10.5143	10.4464	10.4915	10.5099	10.444	10.5068	10.5133	10.6467	10.5765
ENSG00000010017	9.44301	9.45386	9.48978	9.50353	9.41006	9.56844	9.36009	9.5179	9.50023	9.28878	9.39463	9.47982	9.35418	9.4821	9.42695	9.46735	9.36246	9.49557	9.37596	9.45949	9.54326	9.58286	9.62986
ENSG00000010030	1.73823	2.54751	3.2894	1.2909	1.00353	2.40658	2.0887	1.63684	2.85667	2.89487	1.57512	2.09111	1.59455	2.53429	1.07996	1.55678	2.69939	2.22585	3.20736	1.91374	3.19336	2.84578	2.84868
ENSG00000010072	7.77768	7.56066	7.63924	7.59564	7.67945	7.6202	7.70898	7.66171	7.53279	7.51465	7.27993	7.74171	7.52207	7.67398	7.5895	7.50464	7.71301	7.71862	7.4734	7.47688	7.39568	7.44534	7.488
ENSG00000010165	8.89611	9.01437	8.84837	9.04341	8.93186	8.87631	9.09702	9.1049	8.90274	9.10282	9.06473	9.0537	8.95684	9.02921	9.11253	8.98551	8.94975	9.15566	9.00539	9.01329	9.26795	9.353	9.24359
ENSG00000010219	7.24196	7.29407	7.11522	7.03577	7.40388	7.07314	7.38409	7.19793	7.29512	7.42292	7.19633	7.32892	7.19417	7.05837	7.48232	7.1764	7.27489	7.15208	7.16258	7.26822	7.56803	7.77813	7.90782
ENSG00000010244	10.9714	10.9562	10.9968	10.9419	10.9503	11.0765	10.9781	10.9202	11.0013	11.0382	10.916	11.0816	10.9909	11.0165	11.0685	11.0536	11.0173	10.95	11.1445	11.2375	10.9202	11.054	10.9452
ENSG00000010256	11.417	11.5541	11.5521	11.6108	11.5812	11.6519	11.694	11.6075	11.598	11.5902	11.6848	11.5975	11.5506	11.5145	11.4725	11.5919	11.4053	11.4545	11.3837	11.3762	11.3043	11.1815	11.1555
ENSG00000010270	9.16628	8.98363	9.19365	9.15013	9.09716	8.95033	9.03573	9.09102	9.15266	8.97944	9.09377	9.16715	9.02556	9.33139	9.10963	9.01288	9.32586	9.21579	9.04274	9.10074	9.61995	9.58867	9.69969
ENSG00000010278	5.21769	5.12614	5.20891	5.03693	4.96103	5.52896	5.24317	5.16239	4.91341	5.3084	5.23353	5.32658	5.26191	5.52524	4.67286	4.81699	4.7158	5.51947	5.37275	5.1723	8.35921	8.65009	8.49229
ENSG00000010292	8.83837	8.77602	8.90229	8.76501	8.66525	8.74505	8.67139	8.73873	8.83203	8.63272	8.75674	8.71986	8.75916	8.8309	8.78106	8.89424	8.79058	8.91308	8.86417	8.82656	8.83685	8.85198	8.73565
ENSG00000010295	8.2678	8.51444	8.58376	8.58648	8.44583	8.35265	8.57211	8.40334	8.59249	8.52338	8.68915	8.47304	8.22863	8.34855	8.19956	8.46543	8.34039	8.29286	8.46934	8.50249	8.23349	8.04455	8.20612
ENSG00000010310	6.88035	6.61361	6.85773	6.81255	6.29237	6.19103	6.02212	6.70574	6.77108	6.29008	6.57033	5.95111	6.61412	6.55433	6.4206	6.60181	6.22181	6.96938	7.10096	6.91814	8.17553	8.37551	7.98454
ENSG00000010318	6.17504	5.88643	6.22356	6.01479	5.86492	5.80355	5.8429	6.03012	5.83771	5.99477	6.19487	6.34752	5.99141	6.12966	6.08404	5.95819	5.77752	6.24846	6.25978	6.18911	6.36586	6.06085	6.06974
ENSG00000010319	4.21116	4.34944	3.91105	4.90382	4.17659	4.00518	4.69737	4.93253	4.30233	4.98091	4.68623	3.91933	5.53761	4.03011	5.39977	5.20658	4.21606	5.3989	5.17763	5.34597	5.06994	5.22342	4.87086
ENSG00000010322	10.8053	10.8579	10.777	10.8386	10.8588	10.914	10.807	10.8244	10.8371	10.8141	10.8323	10.7961	10.8488	10.8017	10.7312	10.8853	10.6946	10.7556	10.759	10.7953	10.6278	10.4557	10.4486
ENSG00000010361	6.80699	6.46324	6.73233	6.98723	6.57684	6.85901	6.74532	6.76291	6.64175	6.65515	6.53996	6.92657	7.09107	6.47881	6.47581	6.68585	5.91526	7.01931	6.45712	6.66625	6.46596	5.92049	6.19718
ENSG00000010379	4.7387	4.58615	4.51996	4.75716	4.39904	4.00518	5.11358	4.07244	4.86272	4.22527	4.50942	4.43639	4.87184	4.11236	4.73453	4.86585	3.44513	3.18448	4.06389	4.88757	3.19336	3.24941	3.1013
ENSG00000010404	9.81715	9.4449	9.55228	9.48684	9.30735	9.2975	9.10696	9.40273	9.53142	9.34231	9.15917	9.58258	9.41391	9.48318	9.40969	9.28098	9.6456	9.62171	9.5052	9.55761	10.8526	11.0834	11.0282
ENSG00000010539	7.59798	7.59722	7.74337	7.76833	7.67236	7.78404	7.46514	7.88416	7.98195	7.73773	7.51668	7.57902	7.74221	7.57592	7.69409	7.69243	7.74293	7.773	7.77903	7.54261	7.73357	7.54433	7.52627
ENSG00000010610	8.33718	8.54752	8.22603	8.49109	8.74513	8.99663	8.87173	8.61221	8.71544	8.62686	8.75343	8.40528	8.33624	8.44695	7.94948	7.84644	8.04861	7.20338	7.1998	7.36829	6.20136	5.74432	5.64207
ENSG00000010626	5.30553	6.02762	5.94355	5.92076	5.61927	5.9823	5.48699	5.77001	6.13528	5.83596	5.72453	5.64788	5.98544	6.06317	5.72278	6.19152	6.12494	5.74121	5.70851	5.87189	5.84898	5.82647	5.38273
ENSG00000010704	6.57921	7.02942	6.65905	7.00359	7.19684	7.13771	7.11622	6.93447	6.97577	6.94624	6.58528	6.88737	7.14354	6.96183	6.8408	6.57267	7.02999	6.864	6.88946	6.93999	6.66862	6.54009	6.54476
ENSG00000010803	9.19819	9.20413	9.29389	9.29007	9.25735	9.23673	9.26156	9.22421	9.32172	9.21647	9.3925	9.21543	9.07772	9.16067	9.29502	9.27951	9.31346	9.16493	9.26269	9.28272	9.10286	9.08562	9.14692
ENSG00000010810	8.16586	7.63289	7.846	7.39943	7.74174	7.20235	7.27619	7.60029	7.7153	7.67094	7.46911	7.5872	7.51412	7.84011	7.70953	7.41719	7.68246	7.68807	7.73914	7.86727	8.70991	8.65009	8.7145
ENSG00000010818	9.02786	8.57069	8.94916	8.88466	8.55393	8.5642	8.53462	8.66566	8.56897	8.60913	8.53984	8.65521	8.68675	8.70068	8.28963	8.37127	8.43506	8.32631	8.37162	8.49144	9.14122	9.32543	9.30619
ENSG00000011007	10.3181	10.376	10.3761	10.3981	10.4026	10.4768	10.4996	10.4434	10.4464	10.4189	10.5117	10.4021	10.4396	10.5013	10.4023	10.3743	10.4262	10.4011	10.3999	10.448	10.5636	10.6404	10.629
ENSG00000011009	10.4236	10.391	10.4401	10.3234	10.2945	10.2957	10.3358	10.4027	10.3582	10.4215	10.3375	10.3735	10.331	10.4411	10.3061	10.3476	10.3079	10.5089	10.3845	10.3266	10.9612	10.9588	10.9292
ENSG00000011021	9.93475	10.225	9.99189	10.048	10.1103	10.1245	10.1324	10.1132	10.1554	10.2462	10.1874	9.94029	9.98876	9.84594	9.62923	9.86579	9.77091	9.66201	9.82381	9.88532	9.86537	9.74901	9.78444
ENSG00000011105	9.58143	9.76436	9.74275	9.77054	9.71441	9.84809	9.91626	9.75829	9.77155	9.88531	9.91744	9.7801	9.73885	9.78297	9.75173	9.79362	9.62191	9.74473	9.65587	9.63381	9.19508	8.96573	9.11141
ENSG00000011114	9.84231	9.86338	9.78355	9.85185	9.90943	9.94572	9.80171	9.93193	9.94453	9.73265	9.90558	9.94507	9.88162	10.0145	9.76102	9.69566	9.87926	9.69182	9.70329	9.79681	9.65616	9.68401	9.70088
ENSG00000011132	8.62018	8.65115	8.61639	8.57558	8.55393	8.33834	8.51765	8.6005	8.4666	8.40507	8.75674	8.61178	8.51017	8.49757	8.58156	8.68554	8.55374	8.90425	8.89172	8.6154	9.30051	9.15186	9.13812
ENSG00000011143	7.00366	7.44505	7.31277	7.31018	7.52272	7.45316	7.44732	7.19554	7.11223	7.08951	7.36034	7.1962	7.12278	7.41506	7.47673	7.15748	7.16869	7.20338	7.35962	7.11342	7.08536	7.03306	7.04397
ENSG00000011198	8.54095	8.50965	8.778	8.39515	8.67238	8.61653	8.61264	8.61997	8.66825	8.50432	8.49701	8.567	8.6938	8.67384	8.66312	8.3881	8.76893	8.61319	8.4995	8.57757	9.34556	9.52343	9.54455
ENSG00000011201	4.5357	4.06612	4.28035	4.59389	4.53031	4.74485	3.69266	4.39531	4.81017	5.05263	3.6868	3.43059	4.18349	4.94093	4.39587	4.35189	5.03881	4.16335	4.59767	4.58888	4.66915	4.45204	4.65102
ENSG00000011243	10.6206	10.6776	10.6161	10.6423	10.5722	10.6028	10.662	10.6649	10.5622	10.725	10.7902	10.622	10.6077	10.5136	10.6037	10.644	10.5445	10.5975	10.6183	10.6337	10.2815	10.0341	10.1038
ENSG00000011258	8.52274	8.58896	8.54699	8.67596	8.62909	8.63226	8.59657	8.53225	8.66085	8.69567	8.44469	8.60776	8.70432	8.44298	8.62292	8.56865	8.55795	8.41914	8.46017	8.59833	8.30618	8.44761	8.37138
ENSG00000011260	8.09982	7.96215	8.08858	8.15998	8.05688	7.85278	7.47397	8.06553	7.976	7.89232	8.04055	8.01458	7.90304	7.98361	7.94948	8.0921	7.96858	8.28948	7.96777	8.04409	8.40406	8.33114	8.43597
ENSG00000011275	9.79377	9.75559	9.7778	9.74508	9.74595	9.76945	9.71501	9.80681	9.79877	9.71619	9.78046	9.85312	9.7867	9.86978	9.77673	9.69735	9.78356	9.86066	9.88162	9.85342	10.0186	10.1516	10.0924
ENSG00000011295	9.16041	9.13742	9.16967	9.03149	9.1944	9.09354	9.16946	9.05141	9.12335	9.1849	9.10677	9.20484	9.16408	9.13138	9.33289	9.11746	9.3308	9.19421	9.2521	9.21338	9.36513	9.37669	9.48196
ENSG00000011304	12.275	12.2845	12.2863	12.25	12.1641	12.0862	12.1962	12.2474	12.2385	12.2415	12.2266	12.2668	12.2359	12.1908	12.2514	12.231	12.223	12.432	12.2967	12.2594	12.4281	12.4221	12.4364
ENSG00000011347	9.44785	9.18023	9.10445	9.42068	9.42279	9.8209	9.67346	9.19854	9.53302	9.43012	9.64344	9.25703	9.41521	9.43692	8.69061	8.79682	8.71712	8.45889	8.58075	8.45776	8.46278	8.46034	8.28156
ENSG00000011376	9.14858	9.18324	9.28377	9.14276	9.17947	9.28728	9.25645	9.07981	9.26185	9.27386	9.17753	9.17531	9.13327	9.1655	9.16667	9.15481	9.01557	9.14632	9.20894	9.13902	8.94704	8.85921	8.89662
ENSG00000011405	10.7777	10.8265	10.7813	10.9682	10.9569	10.9244	10.9404	10.9005	10.9339	10.8598	10.8694	10.913	10.8504	10.9446	10.8776	10.7705	10.847	10.7277	10.8763	10.8979	10.9153	11.0629	10.9938
ENSG00000011422	4.29939	3.9578	3.82432	4.19863	3.59143	3.55525	3.80886	3.52973	2.85667	3.41368	3.98614	4.28374	3.18269	4.19018	3.72834	4.20771	2.10338	3.90457	3.9978	4.34872	7.73357	8.02326	7.89547
ENSG00000011426	7.53577	6.85921	7.78415	7.12819	6.98428	6.56334	6.74532	6.99538	7.37895	6.86888	6.98533	7.10802	7.04767	7.65352	6.94881	7.09738	7.15763	6.64821	6.66302	6.6793	5.91298	6.09391	6.5233
ENSG00000011451	10.4151	10.3668	10.4549	10.3732	10.2018	10.2661	10.2857	10.399	10.3577	10.2327	10.3904	10.4251	10.4604	10.3484	10.2257	10.3659	10.2473	10.363	10.3878	10.3175	10.3802	10.3121	10.4162
ENSG00000011454	9.4883	9.41085	9.40266	9.47741	9.35578	9.44029	9.5453	9.47149	9.41484	9.50553	9.50093	9.50593	9.56316	9.46067	9.51525	9.34775	9.48479	9.35194	9.49601	9.49497	9.1896	9.06493	9.02051
ENSG00000011478	7.37248	7.65907	7.23084	7.37449	7.30163	7.49677	7.34517	7.48609	7.47489	7.62463	7.38618	7.38628	7.29039	7.13908	7.25268	7.10757	7.26462	7.12192	7.12438	7.21546	7.26283	7.4581	7.48245
ENSG00000011485	10.2268	10.4403	10.2948	10.2789	10.2526	10.3132	10.3482	10.2853	10.2447	10.4274	10.3195	10.1808	10.2504	10.0305	10.2404	10.2372	10.1792	10.1957	10.2624	10.1842	10.3321	10.2419	10.2781
ENSG00000011523	8.23461	7.94806	8.12533	8.13792	8.04595	8.13257	8.13348	8.14832	8.0515	7.9777	7.98527	8.06814	8.12283	8.18711	8.38886	8.36279	8.27023	8.49757	8.49651	8.38398	8.73269	8.63894	8.51964
ENSG00000011566	9.09103	9.12181	9.17187	9.23571	9.15679	8.93138	9.13648	9.14846	9.08793	9.02026	9.09115	9.13683	9.03947	9.14854	9.17504	9.14247	9.15003	9.06346	8.99696	9.26336	9.42698	9.41317	9.43245
ENSG00000011638	2.77413	3.04778	3.52763	2.76282	2.0053	3.41682	2.0887	3.77179	2.04324	2.07686	1.98892	2.68585	3.47249	2.75521	2.44783	1.96826	1.67722	4.03975	3.8558	3.0671	5.5059	5.82528	5.20328
ENSG00000012048	5.54092	5.91568	5.83727	5.91454	5.78829	5.68791	5.8699	5.77613	5.51552	5.24858	5.65793	6.16289	5.44029	5.79804	6.10754	5.68625	6.08836	5.75385	5.59016	6.03525	6.23011	6.44081	6.08447
ENSG00000012061	8.19491	8.31483	8.0413	8.04614	8.18694	8.11029	8.17196	8.16962	8.16569	8.35631	8.04597	8.17509	8.03667	8.08386	8.19956	8.33703	8.20724	8.25515	8.26328	8.18339	8.82512	8.87356	8.91321
ENSG00000012124	3.198	3.57338	2.83672	3.95122	3.00618	3.41682	2.9083	2.87372	3.8607	3.61661	4.15596	2.09111	2.81967	2.94675	1.69063	2.77102	3.44513	2.62035	3.0854	3.35419	3.30569	3.97257	3.95183
ENSG00000012171	7.62384	7.83778	7.7784	7.95655	7.67945	7.87278	7.78898	7.71339	7.56486	7.70472	7.89217	7.90108	7.95094	7.59034	7.72481	7.83422	7.69016	7.73863	7.9284	7.83848	7.30398	7.2971	7.34242
ENSG00000012174	8.95841	9.01099	9.12954	9.08243	9.34912	9.14652	9.2436	9.05998	8.91523	9.16708	9.27253	9.27207	9.21503	9.23618	9.23494	9.13516	9.15282	9.20144	8.992	9.13902	9.26466	9.46789	9.40484
ENSG00000012211	7.40267	7.56066	7.56094	7.38701	7.28314	7.38981	7.30616	7.54432	7.51648	7.08951	7.61465	6.98962	7.48188	7.43917	7.10873	7.47345	7.30528	7.41715	7.50348	7.39225	8.03594	7.97528	7.82267
ENSG00000012232	10.0974	9.87646	9.88881	9.84959	9.74176	9.78089	9.90161	9.94742	9.88227	9.97801	9.92334	9.82574	9.95979	9.91918	9.81554	9.83715	9.87251	10.072	9.87187	9.96072	10.3826	10.417	10.3515
ENSG00000012504	9.60974	9.70067	9.66845	9.88975	9.98003	10.1007	10.077	9.92725	9.71551	9.90481	9.81654	9.84121	9.80713	9.77825	9.96131	9.73893	9.86233	9.53043	9.60407	9.56518	8.55942	8.26737	8.39521
ENSG00000012660	10.8005	10.7227	10.7105	10.7934	10.9371	11.0239	10.9139	10.7592	10.8695	10.8166	10.9452	10.7935	10.8281	10.8132	10.7877	10.6709	10.6499	10.5244	10.486	10.5178	11.7762	11.9103	11.8942
ENSG00000012822	9.69963	9.9294	9.69467	9.88313	9.71613	9.85145	9.96717	9.83694	9.81052	9.9548	9.84942	9.86158	9.74056	9.72205	9.74238	9.73729	9.78176	9.66854	9.70718	9.81466	9.56317	9.67175	9.74443
ENSG00000012963	8.24576	8.20658	8.26771	8.26339	8.2395	8.24041	8.19884	8.27164	8.42352	8.05831	8.17509	8.1642	8.31352	8.32287	8.26894	8.20985	8.29062	8.20569	8.17633	8.33535	8.47785	8.38164	8.43022
ENSG00000012983	9.46464	9.1467	9.27153	9.25974	9.27383	9.37636	9.25901	9.22421	9.41484	9.22037	9.30717	9.27486	9.42585	9.29443	9.46611	9.40879	9.3308	9.39198	9.35136	9.41534	9.52886	9.59445	9.70446
ENSG00000013016	6.26544	6.10533	6.17181	6.50307	5.93768	5.96129	6.24478	6.26594	6.01066	6.31945	5.93965	6.07258	5.94486	6.02736	6.01116	6.22486	5.62522	5.98922	5.87421	5.69331	6.36586	6.3751	6.31427
ENSG00000013275	10.0928	10.176	10.1089	10.0869	10.0308	10.0664	10.1518	10.0078	10.0042	10.1349	10.1577	10.1131	10.1005	10.1115	10.1039	10.1597	10.2156	10.3004	10.1385	10.1139	10.9405	10.9636	11.0441
ENSG00000013288	10.8277	10.7815	10.7661	10.6898	10.7443	10.7818	10.7681	10.6991	10.6812	10.8011	10.8102	10.6815	10.72	10.7154	10.6938	10.6795	10.6578	10.5892	10.6114	10.573	10.1957	10.2102	10.1666
ENSG00000013297	4.38253	5.0752	4.94683	4.30805	4.76169	4.49254	4.43339	4.65897	4.69898	5.24858	4.68623	4.92347	5.05832	5.26247	4.85048	4.86585	4.83169	5.49615	5.07048	4.41261	3.68378	3.97257	2.84868
ENSG00000013306	10.6334	10.6988	10.6233	10.5809	10.6199	10.6672	10.6774	10.7173	10.631	10.6888	10.7384	10.611	10.6663	10.5856	10.4764	10.6166	10.5905	10.717	10.6696	10.5536	10.8629	10.8659	10.8943
ENSG00000013364	8.80108	9.08688	8.88509	8.84889	8.9953	8.99663	8.83451	8.96268	8.86782	9.04073	8.84257	8.99335	8.99555	8.86392	8.87306	8.85382	8.94333	8.91638	8.88031	8.73268	9.41608	9.36489	9.30147
ENSG00000013374	9.81076	9.73799	9.82463	9.76335	9.88663	9.92033	9.87186	9.84854	9.69392	9.90239	9.89662	9.80134	9.89392	9.86237	9.9071	9.79834	9.85207	9.91927	9.77902	9.83229	9.99668	10.1643	10.1743
ENSG00000013375	10.6691	10.6765	10.712	10.7136	10.8088	10.7703	10.7123	10.6686	10.8767	10.8231	10.7982	10.7891	10.7174	10.7648	10.8004	10.6939	10.8684	10.6479	10.6855	10.7231	10.8749	10.9967	11.0427
ENSG00000013392	7.18831	7.43498	7.37512	7.61706	7.64365	7.49677	7.57589	7.3986	7.7436	7.70472	7.62914	7.35788	7.68671	7.53176	7.3544	7.53517	7.47531	7.18162	7.25034	7.69169	6.82759	6.981	6.56591
ENSG00000013441	10.0329	10.0839	10.187	10.1994	10.1479	10.2898	10.1763	10.0827	10.1288	10.2671	10.135	10.1549	10.0256	10.0051	10.0413	10.1312	10.1262	9.93019	10.0607	10.1006	9.66145	9.78108	9.81015
ENSG00000013503	8.67481	8.78397	8.73407	8.87135	8.77191	8.86637	8.93703	8.78432	8.93377	8.66167	8.76988	8.83765	8.95391	8.77517	8.83133	8.76497	8.75064	8.77213	8.663	8.75133	8.5337	8.42505	8.46441
ENSG00000013523	9.73148	9.77226	9.63264	9.78166	9.69584	9.83734	9.82638	9.80944	9.77005	9.60107	9.73529	9.68848	9.69849	9.65229	9.84745	9.74034	9.69016	9.60697	9.73066	9.77694	9.06791	9.06399	8.98429
ENSG00000013561	10.0521	10.018	10.008	10.0656	10.1894	10.1232	10.1449	10.0855	10.0685	10.0233	10.0806	10.1314	10.0478	10.1027	10.2054	10.0437	10.1819	10.1252	10.1046	10.1091	10.3329	10.2864	10.3643
ENSG00000013563	8.64985	8.52871	8.43803	8.53676	8.47871	8.42215	8.4918	8.59657	8.4666	8.76135	8.52441	8.6898	8.38935	8.67045	8.60652	8.59062	8.51958	8.55795	8.76088	8.58453	9.25577	9.24125	9.2003
ENSG00000013573	7.61045	7.4813	7.29771	7.38239	7.2753	7.30473	7.08522	7.30997	7.44247	7.06076	7.22066	7.19385	7.02894	6.96814	7.20512	7.27249	7.31258	7.53043	7.35514	7.34719	7.66019	7.5631	7.7753
ENSG00000013583	10.2408	10.5246	10.3276	10.4453	10.4909	10.4459	10.5805	10.4456	10.3473	10.4341	10.599	10.3526	10.3664	10.3716	10.2784	10.4201	10.2846	10.2568	10.0996	10.1681	9.20598	9.29732	9.0583
ENSG00000013588	5.92063	5.76312	5.76924	5.64937	4.91371	5.23144	5.2839	5.24498	5.72869	5.05263	5.30751	5.11663	5.44029	5.18855	3.46282	5.12864	4.45167	4.43269	3.92855	4.47379	7.89041	7.85027	7.66991
ENSG00000013619	8.29488	8.3897	8.31619	8.30563	8.67238	8.64006	8.66369	8.51987	8.38811	8.32044	8.49701	8.24911	8.37626	8.08895	8.03162	8.19128	8.18016	7.93354	7.64513	7.65253	7.926	7.71339	7.84447
ENSG00000013810	7.61527	7.2749	7.57429	7.15494	7.2738	6.81834	7.1386	7.01904	7.18625	7.58889	7.26143	7.2487	7.31805	7.15857	7.33462	7.59124	7.43006	7.28049	7.50348	6.98271	6.96223	7.19416	7.2009
ENSG00000014123	9.58363	9.51963	9.3376	9.44783	9.59389	9.62652	9.72058	9.55277	9.51672	9.47323	9.55509	9.72187	9.71651	9.58652	9.59014	9.48505	9.52624	9.54613	9.45965	9.39374	9.55609	9.61595	9.66459
ENSG00000014138	5.68873	4.84584	6.12831	5.89468	6.04411	5.89008	5.30424	5.53191	6.72924	5.01578	5.07057	5.26877	6.47363	6.26403	6.12906	6.7261	5.61975	6.1908	6.65232	6.00053	6.12242	6.4336	5.85065
ENSG00000014164	9.17214	9.00079	8.99951	9.03149	8.86191	8.9752	8.93703	9.09659	8.96113	9.0643	9.1171	9.11154	8.99161	8.92779	9.02269	8.97162	8.82245	9.12937	9.0651	9.12955	8.85543	8.82517	8.73332
ENSG00000014216	11.6551	11.7631	11.7074	11.7464	11.6777	11.7339	11.7623	11.8097	11.7008	11.7252	11.7694	11.6535	11.6899	11.5927	11.6635	11.6077	11.6099	11.6905	11.6322	11.5509	11.5589	11.5032	11.4388
ENSG00000014641	10.4955	10.6495	10.5098	10.6318	10.8007	10.821	10.7833	10.6526	10.5592	10.7655	10.7526	10.604	10.568	10.6947	10.5965	10.5723	10.5687	10.3492	10.4339	10.4346	10.2772	10.3485	10.4684
ENSG00000014824	9.90693	9.89494	9.91266	10.0401	10.0473	10.0178	10.0133	10.0254	9.89966	9.92406	9.89362	10.0641	9.96417	10.0528	10.0275	9.9291	10.0816	9.91927	9.94822	10.0551	10.1122	10.0863	10.0929
ENSG00000014914	6.86597	7.22903	7.25591	7.20093	7.19684	7.10426	7.35476	7.17462	7.06816	7.13977	7.1146	6.9394	7.25267	7.00553	7.31457	7.2887	7.0178	7.28049	7.3196	7.46939	7.9216	7.98413	7.85309
ENSG00000014919	9.41741	9.27285	9.28251	9.19836	9.4098	9.58122	9.47765	9.24415	9.39818	9.37849	9.27177	9.51912	9.40788	9.31581	9.409	9.38822	9.32774	9.38949	9.28667	9.27715	9.20681	9.13955	9.25409
ENSG00000015133	10.0053	9.96131	10.0752	10.0301	9.89579	10.0679	10.0462	10.0543	10.0852	9.96877	9.98241	9.96718	9.95098	9.95446	9.98053	9.92623	9.93702	9.90827	9.86494	9.91596	9.65085	9.5697	9.42379
ENSG00000015153	7.95793	7.65039	7.78415	7.41174	7.62173	7.61229	7.50013	7.38955	7.66441	7.62463	7.62191	7.81317	7.54566	7.62578	7.5895	7.77149	7.84989	7.74359	7.68767	7.56387	7.62949	7.69735	7.66991
ENSG00000015171	10.3364	10.3575	10.3598	10.3589	10.3767	10.2948	10.2756	10.3809	10.3668	10.424	10.3559	10.4876	10.4163	10.3632	10.4012	10.3796	10.4365	10.2749	10.3006	10.3777	10.1083	10.2846	10.2916
ENSG00000015285	5.6789	6.38174	5.48817	5.84362	5.46633	5.98598	5.94802	5.83064	5.75673	5.57513	5.98545	6.18461	6.08023	5.64062	5.6118	5.51302	5.52548	5.12252	5.59016	5.50097	4.8652	3.24941	4.0147
ENSG00000015475	7.97142	7.91947	7.87865	7.79677	7.65808	7.68195	7.74589	7.98372	7.65699	8.01408	7.79906	8.03265	7.96267	7.88175	7.67062	7.92347	7.90385	8.1876	8.16132	8.06412	8.64198	8.47296	8.49505
ENSG00000015479	11.4572	11.4045	11.4644	11.2715	11.396	11.251	11.2174	11.454	11.4159	11.2596	11.3095	11.5408	11.4179	11.5698	11.5392	11.5489	11.4422	11.6008	11.5327	11.492	11.7339	11.5372	11.6774
ENSG00000015520	10.4002	10.7082	10.5347	10.7024	10.7876	10.7845	10.7188	10.7495	10.6693	10.7277	10.7813	10.7136	10.6735	10.4936	10.5565	10.6597	10.5231	10.6233	10.6183	10.6101	10.2458	10.0729	9.96343
ENSG00000015532	8.83469	8.96626	8.95172	9.03149	8.92292	8.8697	8.88171	8.99286	8.87103	8.8596	9.0269	8.82387	8.89391	8.8728	9.0196	9.08945	9.04589	8.88193	8.98635	8.85558	8.44143	8.4218	8.27516
ENSG00000015568	8.88039	7.85887	8.46343	7.96576	7.97506	8.22592	8.14214	8.92879	7.30967	8.18578	8.61508	8.89226	6.89161	4.49867	8.41325	7.05101	8.20574	7.22348	7.62535	8.50421	7.8652	7.85467	8.92292
ENSG00000015676	10.2296	10.3441	10.354	10.3072	10.329	10.3565	10.3803	10.2306	10.3229	10.3742	10.3026	10.4274	10.3564	10.2833	10.2951	10.2173	10.3198	10.4902	10.3991	10.4528	10.1671	10.1128	10.1306
ENSG00000016391	10.3584	10.5793	10.5193	10.5617	10.5883	10.6739	10.662	10.6639	10.6867	10.6676	10.7368	10.4777	10.5457	10.5022	10.4865	10.5217	10.3793	10.3038	10.3659	10.4269	9.32571	9.26865	9.19352
ENSG00000016864	9.41366	9.48833	9.44869	9.60082	9.6291	9.68613	9.57021	9.67881	9.56112	9.58629	9.58142	9.43521	9.47172	9.52026	9.59639	9.48114	9.53053	9.50291	9.57745	9.40948	9.26795	9.21895	9.32957
ENSG00000017260	10.3101	10.2568	10.2765	10.2738	10.3368	10.3022	10.2566	10.2256	10.2969	10.1837	10.0674	10.3357	10.2262	10.3695	10.189	10.3096	10.4053	10.3525	10.3286	10.2858	10.5812	10.639	10.6452
ENSG00000017797	11.1841	11.0993	11.1907	11.2716	11.2496	11.1405	11.1594	11.2749	11.1613	11.2156	11.1769	11.2143	11.2329	11.266	11.1711	11.0881	11.1982	11.1198	11.1335	11.1541	11.2177	11.103	11.1441
ENSG00000018189	9.54805	9.58936	9.63699	9.62482	9.67239	9.62455	9.47008	9.53851	9.58673	9.58023	9.58886	9.61394	9.65458	9.62731	9.71012	9.72244	9.73415	9.76317	9.96344	9.98062	9.89148	9.95532	9.86556
ENSG00000018280	2.50398	3.41853	2.83672	2.76282	3.59143	3.41682	3.56627	3.52973	3.05032	3.41368	2.31011	3.10575	3.01257	3.52913	1.07996	1.55678	2.43195	3.18448	3.31982	2.48879	2.6287	2.28335	2.54223
ENSG00000018408	7.84519	7.2973	7.41276	7.31018	6.98428	7.10426	6.83028	7.49455	7.49999	7.20417	6.6858	7.14172	6.99152	7.56865	7.13184	7.0453	7.15763	6.95234	6.7256	7.0242	7.14698	7.39318	7.40829
ENSG00000018510	10.1173	10.0381	10.154	10.0695	9.99289	10.0416	9.92433	10.0615	9.98953	9.95948	9.93214	10.0945	10.1097	10.175	10.2136	10.1362	10.1901	10.211	10.1471	10.2425	10.3874	10.5621	10.4271
ENSG00000018610	7.28873	7.26357	7.42017	7.29697	7.44165	7.35232	7.34517	7.38955	7.14442	7.53983	7.48514	7.52044	7.3362	7.42314	7.55573	7.57245	7.3252	7.30083	7.4113	7.45429	7.20607	7.15554	7.34853
ENSG00000018625	4.01664	3.84069	3.0039	2.41696	3.46585	3.41682	3.42774	3.39154	3.05032	2.54308	3.8931	3.10575	3.18269	2.94675	3.13716	3.66127	2.43195	2.22585	3.20736	3.47881	3.59814	4.10818	3.41275
ENSG00000018699	7.74662	7.63289	7.64558	7.67948	7.78839	7.8325	7.66339	7.99569	7.65699	7.74857	7.77318	7.67422	7.58414	7.74661	8.08586	7.77149	7.80096	7.69321	7.75423	7.86156	8.12667	7.89316	7.9162
ENSG00000018869	5.26228	5.76312	5.40095	5.84362	5.29228	5.46014	5.54075	5.46767	5.41355	5.71431	5.34313	5.40268	5.40633	5.49489	5.54453	5.28052	5.91526	5.75385	5.29234	5.27899	5.27703	5.31037	5.38083
ENSG00000019102	3.79175	3.04778	3.52763	3.80955	3.59143	4.00518	3.10297	2.87372	3.22103	3.79447	2.31011	3.81178	3.47249	2.53429	3.30916	3.13223	4.12811	2.62035	3.20736	3.0671	3.84118	3.65584	2.84868
ENSG00000019144	9.58363	9.49319	9.61294	9.63797	9.39722	9.34568	9.36484	9.43458	9.4603	9.54958	9.37755	9.36084	9.37847	9.40259	9.20257	9.2682	9.33571	9.38564	9.52709	9.45949	9.48927	9.46146	9.26315
ENSG00000019485	7.67422	7.56989	7.88937	8.15998	7.82081	7.62807	7.87813	7.9223	7.95195	7.69355	7.9909	7.99627	7.76918	7.81576	7.59782	7.89433	7.92358	7.83937	7.91504	7.99276	7.73858	7.70807	7.80943
ENSG00000019505	3.90857	3.9578	4.07028	3.65243	3.91348	4.18655	3.42774	4.24289	3.05032	3.61661	4.15596	3.56915	3.33486	4.03011	3.72834	3.54607	4.03446	4.10287	3.8558	3.97836	5.94802	6.50366	6.38736
ENSG00000019549	8.31089	8.62925	8.49529	8.34467	8.46237	8.5099	8.51765	8.48631	8.34259	8.53595	8.47711	8.40528	8.41092	8.53533	8.32514	8.32397	8.54102	8.02601	8.1192	8.26786	8.5707	8.57599	8.56761
ENSG00000019582	9.0018	9.2218	9.28174	9.28338	9.41432	9.34329	9.34333	9.28647	9.10983	9.2776	9.24498	9.12002	9.14104	9.00787	9.09501	9.28401	9.0931	9.04349	9.03246	8.79694	8.63662	8.41528	8.61656
ENSG00000019995	9.74763	9.89486	9.83497	9.84562	9.88351	9.86421	9.81127	9.79368	9.88454	9.83387	9.80287	9.76453	9.84631	9.83341	9.94415	9.75547	9.83859	9.77405	9.84017	9.94117	9.8952	9.91743	9.89673
ENSG00000020129	8.44266	8.20658	8.36693	8.15266	8.15169	7.9375	8.04738	8.38524	8.17611	8.26113	8.15519	8.18051	8.30893	8.16801	8.03162	8.33703	8.25992	8.37826	8.40387	8.15565	8.84617	8.82762	8.94383
ENSG00000020181	3.198	2.21247	2.17339	1.2909	2.0053	1.05348	2.0887	1.63684	2.63293	4.09546	2.57265	2.68585	2.33342	3.26713	1.69063	3.28375	1.67722	2.43654	3.20736	1.50854	3.98308	4.10818	2.70357
ENSG00000020256	7.74662	7.8903	7.94181	8.06185	8.05143	7.91196	7.77476	7.98372	7.91511	7.58889	8.06208	7.95894	7.78248	7.80961	8.01928	8.0662	7.98745	7.99722	7.88793	7.88427	8.33955	8.33114	8.10139
ENSG00000020426	7.63236	7.56066	7.20532	7.39943	7.58445	7.50534	7.32579	7.45173	7.48331	7.47605	7.36034	7.67422	7.46549	7.4707	7.63063	7.44157	7.38333	7.43566	7.44269	7.38431	7.45169	7.31123	7.42575
ENSG00000020577	10.6461	10.5918	10.6233	10.5985	10.4164	10.4314	10.3685	10.5334	10.5482	10.5346	10.4861	10.5071	10.4195	10.4878	10.4083	10.419	10.3758	10.1821	10.1866	10.2337	9.45466	9.45352	9.67679
ENSG00000020922	8.24576	8.12753	8.20043	8.12302	8.30166	8.42215	8.30159	8.1749	8.30036	8.34207	8.18002	8.02063	8.11234	8.21065	8.26894	8.3152	8.42125	8.31302	8.31168	8.45397	8.41975	8.40214	8.4531
ENSG00000021300	6.74549	7.15738	6.94253	7.14303	6.81435	6.92434	6.71585	6.79067	7.16549	6.65515	7.05141	6.62677	6.89688	6.84639	6.6933	6.73927	6.86296	6.77958	6.56374	6.70504	5.96522	5.90195	5.79317
ENSG00000021355	10.0167	9.91861	9.89281	9.90507	10.1415	9.90422	10.0133	10.0313	10.0783	10.0909	10.0419	9.99356	9.84406	10.0185	10.058	9.98823	10.0535	9.98567	10.004	10.0119	10.119	10.0667	9.96939
ENSG00000021461	7.83784	7.85298	7.67066	7.93112	8.31082	8.41762	8.34554	7.94718	7.8319	8.06699	8.22367	7.7121	7.79565	7.4939	7.27361	7.40898	7.35456	6.58329	6.71536	6.97215	4.04912	3.65584	3.81722
ENSG00000021488	5.86389	5.85658	6.09979	5.98214	6.07304	5.85807	6.06948	5.77613	5.93906	6.06581	5.71341	5.81846	5.65793	5.29805	5.76742	5.81624	6.11148	5.79265	5.89252	5.76849	5.03777	5.4187	4.69006
ENSG00000021574	8.76279	8.57069	8.75766	8.74569	8.68652	8.69351	8.82764	8.74938	8.83532	8.60317	8.73679	8.81693	8.67253	8.85797	8.83133	8.73569	8.54527	8.80809	8.67097	8.78189	8.68416	8.76999	8.84565
ENSG00000021645	8.64144	8.78	8.78662	8.67085	8.72814	8.58051	8.4918	8.8616	8.74373	8.84957	8.6073	8.78884	8.73542	8.71391	8.56469	8.67872	8.70197	8.42533	8.41341	8.62891	8.41662	8.37886	8.39816
ENSG00000021762	5.46664	5.88643	5.74584	5.84362	5.21632	5.14638	5.66929	5.24498	5.54797	6.06581	5.57049	5.92554	5.94486	5.74745	5.39977	5.84089	5.80614	6.3817	6.27381	5.97304	6.87388	7.08331	7.12456
ENSG00000021776	9.44059	9.3371	9.44869	9.28338	9.48885	9.52697	9.47887	9.36473	9.41043	9.45018	9.3797	9.5337	9.49815	9.68557	9.47065	9.50254	9.50675	9.39513	9.40811	9.44238	9.33897	9.41317	9.43533
ENSG00000021826	10.858	11.1533	10.8934	11.2477	11.6332	11.8244	11.7753	11.1112	11.3065	11.4013	11.5316	11.157	11.2287	11.0894	10.7302	10.5759	10.6479	9.83115	9.87992	10.0028	7.8859	8.08622	8.13715
ENSG00000021852	9.16921	9.32352	9.30194	9.3992	9.48481	9.52487	9.39072	9.24443	9.42361	9.483	9.38825	9.41238	9.4002	9.21054	9.35269	9.32172	9.29085	9.3904	9.33974	9.15312	8.7845	8.82024	8.77931
ENSG00000022277	9.78042	9.75225	9.68598	9.84506	9.6918	9.88794	9.84489	9.76705	9.91995	9.63625	9.87549	9.68424	9.69206	9.83538	9.69663	9.70744	9.68449	9.74967	9.69289	9.71682	9.83527	9.83339	9.82935
ENSG00000022567	8.61589	8.61594	8.57714	8.73593	8.73156	8.51415	8.60463	8.63153	8.65341	8.76135	8.80861	8.54617	8.61795	8.68732	8.56469	8.66498	8.61972	8.69485	8.59758	8.62891	8.88962	9.00536	8.89662
ENSG00000022840	11.4127	11.4144	11.4852	11.5334	11.465	11.4626	11.5024	11.4992	11.5116	11.4336	11.4726	11.4511	11.4163	11.4228	11.4623	11.4262	11.4129	11.47	11.4372	11.4494	11.6001	11.6245	11.5464
ENSG00000022976	7.41259	7.28614	7.39782	7.29697	7.41641	7.23362	7.41101	7.2763	7.18625	7.01965	7.32516	7.09661	7.12278	7.3572	7.2099	7.34148	7.10101	7.3984	7.52123	7.46186	7.13182	7.10779	7.09577
ENSG00000023041	8.85666	8.73559	8.80656	8.95784	8.95541	9.01174	8.87173	8.91618	8.9551	9.0643	8.67525	8.82387	8.81522	8.77832	9.08024	8.94912	9.03081	8.92186	8.85953	8.97148	9.08919	8.93642	9.03195
ENSG00000023171	5.86389	5.91568	5.81495	5.42484	6.31075	6.49617	6.11534	6.03012	5.81122	6.34824	6.39478	6.30849	6.31796	5.64062	5.82526	5.95819	6.04098	5.88533	5.92843	6.09488	6.92753	7.20176	7.02118
ENSG00000023191	10.5661	10.5505	10.6761	10.5409	10.5277	10.4865	10.5285	10.4886	10.4804	10.564	10.6137	10.5232	10.567	10.5675	10.4387	10.6536	10.554	10.7196	10.7037	10.6815	10.9405	10.9365	10.9406
ENSG00000023228	10.8342	10.9421	10.8596	10.8912	10.9613	10.9395	11.0864	10.9174	10.9285	10.9761	10.9971	10.9005	11.008	10.9793	10.9656	10.871	10.9363	10.8397	10.7458	10.8867	10.8634	11.012	10.9552
ENSG00000023287	10.8378	10.6452	10.8048	10.6784	10.8439	10.6871	10.7752	10.738	10.7988	10.7642	10.7114	10.8223	10.8249	10.8564	10.8561	10.7713	10.9208	10.8914	10.8248	10.9432	11.3319	11.4548	11.4651
ENSG00000023318	10.2941	10.197	10.2309	10.25	10.3267	10.2648	10.268	10.3262	10.202	10.3333	10.3428	10.2686	10.2408	10.2955	10.2284	10.1199	10.259	10.1848	10.1528	10.1199	10.2737	10.2882	10.3756
ENSG00000023330	11.4378	11.5748	11.5084	11.5543	11.6949	11.8068	11.7207	11.6312	11.6177	11.7443	11.7662	11.5771	11.6364	11.5398	11.5566	11.6068	11.5588	11.4666	11.512	11.4346	11.0448	10.9641	10.9672
ENSG00000023445	8.72745	8.77602	8.70098	8.50839	8.69004	8.7983	8.66369	8.76696	8.65341	8.62686	8.36464	8.44631	8.45726	8.5052	8.29476	8.19607	8.05459	7.48388	7.95912	7.83848	9.17488	9.41807	9.40924
ENSG00000023516	10.0265	9.97354	9.92052	10.1002	10.0363	10.0592	10.1951	10.1659	10.0245	10.1452	9.97107	10.1272	10.071	10.2866	10.0474	9.98685	10.0683	10.0451	10.0546	10.1495	10.041	10.2557	10.2391
ENSG00000023572	8.01115	8.07664	7.95207	8.15266	7.83992	8.04128	8.09393	8.26671	8.1552	8.02304	8.02419	8.15323	7.99158	7.97814	8.16638	8.10233	8.29568	8.34601	8.22769	8.21956	8.62855	8.77764	8.77022
ENSG00000023608	5.57667	6.10533	6.06238	6.27949	5.78829	5.10189	5.81538	5.88315	5.96332	5.57513	5.79283	5.81846	5.87209	5.66808	6.40171	5.91241	6.22181	5.90318	5.56756	5.64092	5.96522	5.99238	6.06722
ENSG00000023697	9.13365	9.43125	9.41569	9.43884	9.59201	9.60277	9.50495	9.53236	9.52286	9.534	9.46299	9.41927	9.49815	9.42087	9.53055	9.40259	9.34793	9.44013	9.40333	9.47454	9.39877	9.25958	9.24523
ENSG00000023734	10.7642	10.7765	10.7493	10.7322	10.8368	10.716	10.7299	10.7662	10.775	10.7427	10.7926	10.7386	10.7465	10.8866	10.8254	10.8132	10.8886	10.8897	10.8449	10.7915	11.2496	11.3259	11.3724
ENSG00000023839	11.2332	11.1716	11.2397	11.233	11.3369	11.3618	11.2171	11.3451	11.4577	11.3806	11.3066	11.5909	11.5132	11.5482	11.6987	11.6282	11.7859	11.925	12.0326	12.0893	11.6775	11.6442	11.7397
ENSG00000023892	5.12414	5.43978	5.57042	5.21608	5.17679	5.18954	4.50405	5.02891	5.00975	5.05263	5.19507	5.11663	5.26191	5.29805	4.90514	4.86585	5.08626	5.3477	5.31964	4.69547	4.90141	4.72952	4.24191
ENSG00000023902	8.38837	7.88291	8.12533	7.93964	7.74849	7.47076	7.41101	7.83168	7.90888	7.61282	7.69264	7.82705	7.95094	7.97264	7.92324	7.85252	8.06054	8.02601	8.02281	8.06412	10.0216	9.97653	9.93628
ENSG00000023909	10.5849	10.4849	10.5415	10.4705	10.4541	10.5396	10.4735	10.4991	10.529	10.5299	10.5636	10.7523	10.7651	10.804	10.843	10.9226	10.9306	11.0723	11.0741	11.1353	11.0574	11.0587	11.134
ENSG00000024048	10.102	10.0197	10.003	9.98139	10.1492	10.1148	10.0928	10.0181	10.1072	10.1493	9.99646	10.07	10.0898	10.1762	10.0789	9.94055	10.0325	10.1109	10.0455	10.1831	9.97985	10.074	10.1386
ENSG00000024422	6.05343	5.79495	5.79228	6.04672	5.98423	5.88457	5.89641	5.95851	5.41355	5.12095	5.96273	5.92554	5.96832	6.006	5.82526	6.06667	5.96687	5.79265	5.8369	5.69331	9.02295	9.23571	9.0109
ENSG00000024526	4.97137	4.34944	4.21367	4.83235	4.17659	3.55525	4.63576	4.06336	4.6157	4.22527	4.07355	4.36209	4.10098	4.98526	4.47026	4.35189	3.58383	3.40087	4.55235	3.97836	2.79189	2.84578	3.81722
ENSG00000024862	7.45163	7.86802	7.62006	7.72951	7.92589	7.9626	7.63219	7.74211	7.57276	7.71581	7.66477	7.7921	7.70777	7.50916	7.98163	7.63721	7.77223	7.63567	7.78394	7.60547	7.26977	7.20176	7.11742
ENSG00000025039	8.21773	8.06363	8.03165	8.32528	8.32897	8.30928	8.32129	8.37152	8.24205	8.39821	8.28447	8.36304	8.30433	8.34855	8.36468	8.39227	8.33549	8.59958	8.48751	8.54231	9.38445	9.57263	9.41508
ENSG00000025156	7.23381	7.02942	7.49929	7.51805	6.99569	7.05844	7.07039	7.01904	7.44074	7.5019	7.09385	7.40491	7.37182	7.43118	7.49467	7.26157	7.41155	7.33409	7.4113	7.63255	7.22047	7.28284	7.30518
ENSG00000025293	8.61159	8.58442	8.46694	8.52548	8.42067	8.37151	8.41136	8.40782	8.496	8.5484	8.51664	8.40064	8.58797	8.56485	8.49957	8.50453	8.70197	8.56637	8.48148	8.46531	8.41349	8.54644	8.52505
ENSG00000025423	5.61156	6.31744	5.43062	5.64937	6.19679	6.47887	6.47328	6.14211	5.96332	5.99477	6.32525	6.26836	5.92101	5.52524	6.15342	5.60224	5.38076	5.02811	4.59767	5.27899	3.07154	2.68152	2.54223
ENSG00000025434	9.37357	9.4859	9.4505	9.38053	9.44376	9.50579	9.56195	9.41241	9.40822	9.67985	9.65057	9.41238	9.48601	9.31194	9.3698	9.38385	9.20748	9.34706	9.2521	9.3186	8.7352	8.5992	8.69304
ENSG00000025708	6.48828	7.0373	6.78817	6.73473	6.41637	6.36884	6.87775	6.26633	6.61657	6.47711	6.95837	6.73422	6.72847	6.7714	6.66142	6.98133	6.65165	6.95773	6.73445	6.6754	8.71955	8.51859	8.44259
ENSG00000025770	8.70339	8.88725	8.72512	8.69119	8.62543	8.81906	8.71672	8.7774	8.79871	8.83439	8.75674	8.85807	8.75916	8.66364	8.71758	8.8705	8.60757	8.87516	8.73068	8.7575	9.06346	9.02906	9.08601
ENSG00000025772	9.63115	9.59615	9.62421	9.66907	9.45413	9.59476	9.68491	9.58483	9.59257	9.68831	9.63089	9.54634	9.55543	9.47628	9.49312	9.57044	9.62994	9.48821	9.53439	9.45571	9.59115	9.46935	9.56308
ENSG00000025796	10.8386	10.9532	10.9586	10.8908	11.0236	11.0274	10.9138	10.8803	10.9988	10.9873	10.9586	11.0058	11.0039	11.0169	11.008	11.0055	10.9851	10.921	10.9475	10.9611	11.2685	11.3036	11.3817
ENSG00000025800	10.4396	10.439	10.4183	10.4982	10.3335	10.4581	10.5317	10.5013	10.4794	10.4607	10.4508	10.4393	10.4748	10.4369	10.3856	10.2784	10.3505	10.3451	10.37	10.4192	10.4513	10.5424	10.4934
ENSG00000026025	13.2541	12.8526	13.1023	12.7343	12.4585	12.2551	12.2125	12.6602	12.6817	12.455	12.4426	12.6736	12.5892	12.8365	12.6187	12.6209	12.7484	12.8824	12.7602	12.763	14.1434	14.1909	14.1304
ENSG00000026036	7.25028	7.78938	7.72816	7.69749	7.17824	7.53726	6.96387	7.26823	7.31316	7.01284	7.82316	7.46258	7.61598	6.90745	7.37787	7.55639	7.74957	7.48986	7.88103	7.81751	7.88613	7.76428	7.60617
ENSG00000026103	8.80108	8.55683	8.78088	8.69623	8.8047	8.86637	8.73887	8.75644	8.74023	8.48501	8.55131	8.82387	8.73542	8.96147	8.82779	8.70581	8.98773	8.66901	8.57509	8.70105	8.33955	8.19305	8.28156
ENSG00000026297	9.86928	9.99379	10.0201	9.99885	9.95979	10.0653	10.0465	9.86143	9.94605	10.0521	10.1119	9.80905	9.96641	9.7984	9.85599	9.91888	9.78176	9.87928	9.84638	9.7969	9.34528	9.14202	9.13101
ENSG00000026508	9.81638	9.80791	9.84818	9.55993	9.54621	9.61073	9.59065	9.47791	9.70296	9.52142	9.63987	9.69374	9.58039	9.74962	9.76472	9.79992	9.8555	10.2594	10.1172	10.3616	11.6485	11.7786	11.6401
ENSG00000026559	3.198	3.57338	2.6476	1.96111	2.59085	1.05348	2.0887	3.39154	2.36801	3.17748	2.98707	2.09111	3.33486	3.26713	2.94184	3.13223	2.43195	3.06276	3.0854	3.21777	5.59702	5.63627	5.35676
ENSG00000026652	8.27869	8.20065	8.14335	8.03026	8.15169	8.1815	8.20945	8.14295	8.12325	8.22278	8.27066	8.15323	8.0143	8.20597	8.17197	8.0921	8.17469	8.01374	8.16132	8.2061	8.08004	8.32071	8.27836
ENSG00000026950	8.02571	8.18277	8.0622	8.08778	8.43066	8.12487	8.19814	8.23791	8.09371	8.30474	8.31497	8.16769	8.19078	8.27599	8.14525	8.08257	7.97578	7.69572	7.83394	8.03503	7.22462	7.44002	7.4171
ENSG00000027001	7.22257	7.48462	7.32861	7.36185	7.42487	7.47076	7.3925	7.40759	7.31439	7.35362	7.30724	7.45938	7.35412	7.50916	7.68631	7.58709	7.63539	7.3921	7.5271	7.52103	7.43943	7.39981	7.66502
ENSG00000027075	5.97523	5.69727	6.09979	5.98214	5.29228	5.77549	5.69972	5.63013	5.72869	5.95789	5.86811	5.97623	5.71452	5.58408	5.90788	5.91241	5.8342	6.22027	5.89252	5.614	5.78317	5.68046	6.00927
ENSG00000027697	10.2056	10.2424	10.2724	10.0907	10.3097	10.296	10.1014	10.2115	10.3112	10.2404	10.2473	10.1686	10.2262	10.326	10.3255	10.1983	10.2693	10.211	10.1585	10.167	10.5141	10.554	10.5875
ENSG00000027847	8.58111	8.77602	8.86476	8.68613	8.82082	8.67465	8.72784	8.74229	8.75768	8.58514	8.96252	8.72357	8.7792	8.79086	8.68671	8.79366	8.78699	8.93493	8.87801	8.91193	9.35864	9.44874	9.4958
ENSG00000028116	8.40338	8.24165	8.27998	8.41363	8.20671	8.17614	7.85804	8.1749	8.22208	8.10122	7.91009	8.42366	8.20906	8.1191	8.3401	8.14749	8.37901	8.25168	8.34196	8.4194	8.56789	8.4218	8.54648
ENSG00000028137	5.42802	4.43273	4.28035	4.90382	5.36444	5.38786	5.2839	4.39531	5.18505	4.90545	5.19507	5.54382	5.22342	4.52654	4.541	5.24403	4.93897	4.65957	4.76593	4.74594	4.39219	4.50215	4.65102
ENSG00000028203	10.0553	9.93298	9.91266	9.82449	9.82563	9.87147	9.74995	9.87147	9.80885	9.79932	9.80061	9.78721	9.97868	9.92631	10.0213	9.73893	9.91419	9.89719	9.96777	10.0387	10.202	10.1749	10.2309
ENSG00000028277	3.5252	3.24503	3.1537	2.41696	3.1762	2.0795	2.41636	4.46588	3.51168	3.17748	3.79363	3.56915	3.33486	3.64421	3.60168	2.77102	3.11992	3.58899	4.30156	2.70834	4.82806	4.9975	4.48332
ENSG00000028310	8.99177	8.82255	8.8039	8.74199	8.7353	8.68983	8.76554	8.83519	8.84577	8.84957	8.72672	8.85847	8.92716	8.91953	9.08622	8.97148	8.97215	8.95243	9.10872	9.10382	9.15966	9.08736	9.05951
ENSG00000028528	10.1051	10.2625	10.1826	10.2906	10.289	10.256	10.2982	10.2319	10.2692	10.2783	10.3206	10.0787	10.2516	10.2128	10.1257	10.1098	10.1968	10.0157	10.1566	10.2013	9.90157	9.86605	9.89406
ENSG00000028839	7.45163	7.52314	7.35205	7.56289	7.61435	6.83202	7.11622	7.01904	7.25666	7.43638	7.22372	7.1962	7.38931	7.71405	7.16581	7.33282	7.34484	7.15208	7.40494	7.59862	7.98201	8.02755	7.96478
ENSG00000029153	7.41259	6.97489	7.29675	6.81255	6.48271	6.42572	6.50808	7.10999	6.92725	6.63192	6.98533	6.98962	6.8846	7.05837	6.96177	6.41744	6.77882	6.76013	6.65232	6.98271	8.15318	8.46034	8.12296
ENSG00000029363	10.8867	10.9367	11.004	11.0166	10.9789	11.0011	10.8931	10.9981	10.9109	10.9466	10.8265	10.9418	10.952	11.0564	11.0839	10.9709	11.0265	10.9369	10.9449	11.022	10.8385	10.7906	10.91
ENSG00000029364	10.5516	10.521	10.5908	10.5891	10.5901	10.7206	10.7761	10.5639	10.529	10.5778	10.5389	10.6329	10.5937	10.6334	10.6684	10.5778	10.5718	10.4776	10.4548	10.5322	10.5812	10.6453	10.6723
ENSG00000029534	6.46938	6.48292	6.11813	6.13846	5.98423	6.29349	6.26526	6.32408	6.51616	6.03073	5.62937	6.14083	5.89676	6.36597	6.10754	6.08742	5.62522	5.3477	5.49756	5.64092	6.03207	5.92049	6.05486
ENSG00000029639	7.7613	7.99493	7.74997	8.02089	7.9126	8.00677	7.97702	7.71585	8.04498	7.86738	8.02518	7.7258	7.89786	8.00724	7.89286	7.91061	8.0118	7.91114	7.95172	7.80238	7.86143	7.5875	7.8188
ENSG00000029725	9.93647	9.9822	9.87539	9.96477	9.93927	10.0133	10.0224	9.95204	10.0488	10.0233	9.91597	9.93229	10.0791	10.0038	10.1654	10.0142	10.046	10.0461	10.0607	10.1211	10.2002	10.0657	10.1217
ENSG00000029993	8.86392	8.78793	8.86204	8.69623	8.30166	8.47107	8.41136	8.39432	8.50015	8.38437	8.35595	8.567	8.59928	8.74647	8.58989	8.56865	8.82944	8.63738	8.59758	8.71695	9.19143	9.28664	9.08601
ENSG00000030066	9.92785	9.85208	9.84542	9.94161	9.80795	9.82604	9.81567	9.8286	9.76811	9.81745	9.80221	9.91777	9.82652	9.90627	9.91045	9.81865	9.88766	9.76072	9.81064	9.84392	9.59391	9.72415	9.74211
ENSG00000030110	8.61962	8.83324	8.68568	8.70995	8.6244	8.60462	8.58419	8.60812	8.65252	8.70638	8.77957	8.71229	8.56087	8.72281	8.83104	8.95464	8.79058	8.94295	8.89384	8.74182	9.23777	9.24099	9.17943
ENSG00000030419	5.74323	5.79495	5.51611	5.69037	5.17679	5.62641	5.54075	5.39719	5.61076	5.18618	5.5091	4.97424	5.59902	5.74745	5.50968	5.54338	5.59274	5.09173	5.31964	5.34597	6.37876	6.06085	6.19718
ENSG00000030582	11.6335	11.5948	11.6324	11.5425	11.4726	11.4941	11.547	11.5634	11.4646	11.4758	11.5636	11.4331	11.5187	11.567	11.4018	11.5364	11.4987	11.4711	11.3993	11.3106	11.6719	11.606	11.6067
ENSG00000031003	9.42596	9.27638	9.33956	9.45677	9.22622	9.31677	9.39072	9.32968	9.3747	9.31089	9.27756	9.43294	9.24795	9.3737	9.36737	9.38175	9.38398	9.33067	9.3414	9.55106	9.05946	9.20767	9.12572
ENSG00000031081	4.60659	4.16687	4.67671	4.19863	4.53031	3.55525	3.69266	4.07244	4.37648	4.45436	3.98614	4.43639	3.92029	4.46525	3.60168	3.76795	4.83169	5.06027	4.40716	4.58888	6.11149	6.09391	5.94616
ENSG00000031691	5.80482	5.69727	5.67325	5.1588	5.65077	5.38786	5.69972	5.83064	5.64116	5.66939	5.71341	5.84599	6.0365	5.61263	5.90788	5.73966	5.45494	5.69361	5.65592	5.71881	5.48219	5.49493	5.60168
ENSG00000031698	11.837	11.8003	11.8245	11.6748	11.786	11.7289	11.7895	11.7214	11.7258	11.7197	11.797	11.9028	11.8516	11.8586	12.0156	11.9985	12.0566	12.1145	12.0907	12.0234	12.1877	12.2003	12.2397
ENSG00000031823	9.90693	9.97701	9.85092	9.80362	9.82723	9.68989	9.71501	9.72989	9.71908	9.90481	9.78936	9.86998	9.79734	9.73509	9.71968	9.74873	9.87589	9.89607	9.83332	9.67835	9.90826	9.77217	9.79791
ENSG00000032219	8.60295	8.62925	8.71008	8.91091	8.80146	9.01774	8.72414	8.71358	8.89014	8.7667	8.837	8.75295	8.65818	8.77517	8.43603	8.6371	8.70957	8.4709	8.46017	8.48402	7.81175	8.04455	7.91208
ENSG00000032389	8.08749	8.08953	7.96226	8.03822	8.14659	8.05884	8.0175	7.98972	8.02293	7.9777	8.09379	7.95263	7.99729	8.12902	8.13242	7.96331	8.07237	8.0422	7.73407	8.00835	8.0481	7.96639	7.97272
ENSG00000032444	10.1567	10.225	10.2139	10.1191	10.0998	10.0679	10.1452	10.1882	10.1956	10.2113	10.1512	10.1899	10.2243	10.1981	10.0849	10.083	9.98318	10.2028	10.1488	10.1481	10.3232	10.3126	10.1899
ENSG00000032742	7.72289	7.64167	7.62006	7.78735	7.78839	7.91839	7.83081	7.56054	7.57276	7.73773	7.68573	7.67422	7.72165	7.72062	7.67849	7.60159	7.77947	7.71357	7.84629	7.92317	8.0113	8.11468	8.08684
ENSG00000033011	8.91369	9.04778	9.04473	8.83524	8.84309	8.99359	9.00561	9.11863	9.13408	9.0066	8.89283	9.05417	9.06861	9.06063	8.91028	8.97341	9.02777	9.07291	8.94306	8.95213	9.08917	9.18595	9.06158
ENSG00000033030	8.70339	8.83079	8.7635	8.74569	8.80794	8.71213	8.78216	8.80148	8.72612	8.80354	8.63271	8.78174	8.72168	8.74002	8.74406	8.78734	8.72464	8.61048	8.9053	8.76364	8.54804	8.53144	8.58065
ENSG00000033050	8.9315	8.80593	8.64536	8.65788	8.4465	8.57864	8.6495	8.5839	8.37993	8.62026	8.64845	8.62228	8.74211	8.63721	8.70785	8.4699	8.69866	8.77852	8.85866	9.00215	8.86868	8.97528	8.94615
ENSG00000033100	10.1694	10.1	10.1848	10.1852	9.98862	9.83456	9.92594	9.9989	10.1474	10.0477	10.0951	10.1244	10.1603	10.1509	9.98212	10.1621	9.96743	10.2979	10.1801	10.1623	11.0105	11.0964	11.0577
ENSG00000033170	6.88035	6.97489	6.79068	6.75574	6.67942	6.42572	6.74532	6.53572	6.53247	6.65515	6.25219	6.79154	6.68664	6.95069	6.72403	6.87674	7.00552	6.87308	7.02004	7.0242	8.15693	8.1187	7.96478
ENSG00000033178	9.82384	9.77836	9.82881	9.77769	9.73837	9.79143	9.74632	9.68252	9.82383	9.7677	9.70119	9.87833	9.73885	9.81095	9.7405	9.68719	9.80676	9.69311	9.73786	9.83229	10.0216	10.3103	10.1855
ENSG00000033327	9.15154	8.87613	9.05769	8.8029	8.76193	8.66321	8.6006	8.86487	8.93989	8.77202	8.7926	9.02388	8.81846	8.96977	8.90358	8.90305	9.0902	9.03946	8.96273	8.96617	9.75221	9.84193	9.84948
ENSG00000033627	11.1174	11.1199	11.109	11.1565	11.1574	11.2252	11.1764	11.1619	11.1593	11.0742	11.1953	11.2359	11.2617	11.1331	11.3405	11.3217	11.2577	11.4077	11.4275	11.3926	11.3385	11.2385	11.2439
ENSG00000033800	9.18088	9.27356	9.22362	9.30004	9.23346	9.36933	9.21756	9.28403	9.21966	9.34699	9.28445	9.32217	9.22379	9.30102	9.12698	9.21733	9.28578	9.09097	9.11271	9.30814	8.89637	8.91577	9.01475
ENSG00000033867	8.54997	8.16455	8.47408	8.2857	8.08918	8.04716	8.02352	8.07685	8.496	8.08421	7.95682	8.32931	8.36304	8.47442	8.28448	8.27054	8.37424	8.41292	8.54359	8.48773	9.30896	9.4772	9.4482
ENSG00000034053	7.25603	7.26357	7.22238	7.21504	6.99569	7.07003	6.7742	7.14267	7.19652	6.90808	7.08335	7.00191	7.13319	7.24316	7.14325	7.3241	7.38333	7.50156	7.20713	7.4236	8.23703	8.1426	7.95679
ENSG00000034152	9.85329	9.95956	9.77201	10.0141	9.80147	10.046	9.9656	10.0543	9.87269	9.87545	9.94233	9.84803	9.81847	9.87715	9.86291	9.88978	9.81206	9.84391	9.83805	9.67509	9.80453	9.88388	9.84517
ENSG00000034510	13.2966	13.2184	13.3076	13.0939	13.0865	13.0787	13.0367	13.1328	13.0834	13.1237	13.1153	13.1351	13.1473	13.1874	13.2132	13.2331	13.1844	13.319	13.2103	13.1438	13.6159	13.4513	13.4354
ENSG00000034533	6.63114	6.44329	6.64646	6.93701	7.09447	6.99902	6.75983	6.46856	7.04561	7.01965	7.07279	6.73378	6.59917	6.74689	6.72403	6.77808	7.00552	6.61611	6.87112	6.76746	6.63676	6.59885	6.31427
ENSG00000034677	10.1173	9.93477	10.0788	9.89852	9.90035	9.9567	9.84998	9.97793	10.1003	9.89996	9.96537	10.0494	10.0381	10.058	10.1083	9.98547	9.99566	9.955	10.0828	10.0488	9.85387	9.89799	10.021
ENSG00000034693	7.80038	7.55137	7.85697	7.72951	7.76858	7.82568	7.81004	7.87122	7.98195	7.75933	7.70638	8.0085	7.86592	7.82189	7.9031	8.14244	7.87712	7.87136	7.7741	7.71715	7.53465	7.52628	7.69891
ENSG00000034713	9.49532	9.51247	9.59504	9.45974	9.37555	9.38334	9.44111	9.36473	9.39713	9.41319	9.57207	9.58156	9.50418	9.53525	9.6272	9.51791	9.52624	9.6462	9.4302	9.4347	9.80931	9.75548	9.86343
ENSG00000035115	10.1066	9.94545	10.1008	10.0811	10.1208	10.0679	10.0624	10.098	10.0894	10.0345	10.0419	10.096	10.0422	10.0423	10.2217	10.1312	10.1319	10.0828	10.1556	10.1507	9.72217	9.63713	9.74327
ENSG00000035141	9.86056	9.87066	9.75889	9.71691	9.76194	9.76136	9.69627	9.75301	9.84519	9.79148	9.86173	9.9129	9.8488	9.83538	9.90543	9.91611	9.94347	9.76805	9.79613	9.95667	9.86765	9.75806	9.88778
ENSG00000035403	12.3251	12.1518	12.2766	11.9978	11.9404	11.888	11.8902	12.0647	12.0623	11.9671	11.9654	12.073	12.1209	12.1347	12.0261	12.0148	12.0736	12.0451	11.9894	11.9828	12.4201	12.493	12.4321
ENSG00000035499	5.50426	4.78944	4.90517	5.1588	5.13614	4.49254	4.57141	5.11926	5.37789	5.36584	4.98568	4.36209	5.33593	5.11064	4.23448	4.81699	5.52548	4.81845	4.8051	5.05708	4.90141	4.64282	4.87086
ENSG00000035664	7.27791	7.00241	7.14398	6.84922	6.98428	7.17039	6.88425	7.10999	6.88977	7.01965	7.09385	6.76295	6.56879	6.99473	7.09704	6.88861	6.77882	6.89107	6.94312	7.15137	7.33078	7.26843	7.36672
ENSG00000035681	8.36301	8.32031	8.31619	8.44391	8.5769	8.37151	8.41595	8.46923	8.45381	8.37741	8.37328	8.34386	8.39369	8.39859	8.43138	8.30638	8.47571	8.48282	8.47238	8.40376	8.72514	8.81529	8.80621
ENSG00000035687	9.06609	8.94868	8.91021	8.81221	8.79168	8.73416	8.82074	8.9535	8.94295	8.75061	8.99367	8.98108	8.90002	9.09137	9.0165	8.90009	9.17768	8.91528	8.99907	8.85558	9.43627	9.4662	9.43533
ENSG00000035862	10.3571	10.241	10.3088	10.2569	10.255	10.1697	10.1965	10.1725	10.1658	9.98719	10.2104	10.3013	10.2599	10.1762	10.2377	10.338	10.2263	10.4066	10.2232	10.3494	11.7883	11.8383	11.6933
ENSG00000035928	10.2027	10.1189	10.1739	10.2906	10.2226	10.335	10.2932	10.2607	10.2981	10.2094	10.2901	10.2326	10.2262	10.2621	10.2109	10.1174	10.2486	10.071	10.1221	10.1115	10.0859	10.1951	10.2242
ENSG00000036054	8.88902	8.86118	8.84837	8.98693	8.82722	8.91219	8.8138	8.97785	8.95812	9.03361	8.75343	8.9144	8.94506	9.06837	8.93675	8.79366	8.85705	8.88193	8.96705	9.01329	9.3956	9.65523	9.66213
ENSG00000036257	10.1591	10.0231	10.019	10.0301	10.0363	10.1384	10.1028	10.116	10.1207	10.1534	10.074	10.083	10.1005	10.1473	10.1514	10.1262	10.1668	10.071	10.0627	10.0787	10.2379	10.3562	10.3261
ENSG00000036448	4.11717	4.16687	3.73204	4.40975	4.39904	3.26368	4.69737	4.39531	3.51168	4.82581	4.23392	4.28374	3.7137	3.85002	3.72834	3.76795	4.65416	4.22139	3.52142	3.89134	3.59814	4.17149	3.58836
ENSG00000036473	8.5634	8.56147	8.43071	8.69623	9.14915	9.11888	9.00561	8.82516	8.60411	8.8596	8.90411	8.85468	8.6938	8.63957	8.81358	8.63005	8.37901	8.08582	8.04343	8.19706	4.8652	4.68682	4.80123
ENSG00000036530	5.64562	4.91062	5.10236	5.27117	5.46633	6.08073	5.72951	5.32309	5.10006	5.36584	5.19507	5.60953	4.92077	5.52524	5.39977	4.95886	5.13219	4.43269	4.88038	5.27899	3.4099	3.65584	4.07495
ENSG00000036549	9.36337	9.23347	9.48448	9.51784	9.53453	9.46025	9.34091	9.39217	9.49608	9.35411	9.27064	9.61194	9.30666	9.44289	9.40815	9.47721	9.54758	9.49704	9.44733	9.44429	9.30559	9.44874	9.3707
ENSG00000036672	6.22094	6.40255	6.55515	6.65578	6.54614	6.77649	6.57525	6.45127	6.48298	6.34824	6.65779	6.56186	6.59917	6.04841	6.79811	6.77808	6.30438	6.60525	6.49354	6.73034	6.15712	5.9388	6.30172
ENSG00000037042	7.82541	7.93147	7.83783	7.90165	8.13796	7.92549	7.81638	7.98648	7.89929	7.97706	8.06235	7.81992	7.9836	7.8932	7.73261	7.91671	7.88311	7.82438	8.19038	8.11739	7.67554	7.6479	7.5899
ENSG00000037241	8.02325	8.22947	8.02812	8.12137	7.97673	8.19522	8.18137	8.25001	8.03064	8.03831	7.9192	8.04684	8.00531	8.09169	7.94811	8.02818	7.80465	8.16301	8.15527	7.78463	7.74008	7.84921	7.66923
ENSG00000037474	9.89459	9.88757	9.83853	9.67675	9.71268	9.75598	9.73718	9.78441	9.80046	9.83535	9.78451	9.83607	9.89086	9.79858	9.88348	9.80306	9.86743	9.89273	9.79977	9.96472	10.138	10.1633	10.1674
ENSG00000037637	9.07549	9.23056	9.09753	9.07084	9.18944	9.0907	9.04465	9.12957	9.23718	9.20077	9.31839	9.13961	9.14104	9.21521	9.30267	9.24761	9.25756	9.3729	9.13209	9.39374	9.40351	9.33928	9.48335
ENSG00000037749	8.34757	8.09594	8.17874	8.26549	8.48277	8.20798	8.40676	8.26671	8.37912	8.29109	8.30719	8.33417	8.33624	8.53905	8.49066	8.28857	8.04261	8.147	8.23129	8.28929	8.52792	8.65009	8.56235
ENSG00000037757	8.67068	8.90194	8.68875	8.75539	8.55007	8.50136	8.58031	8.65437	8.71544	8.67877	8.72672	8.73466	8.70082	8.68059	8.65517	8.77779	8.87405	8.82924	8.99272	8.92842	8.81803	8.75198	8.71923
ENSG00000037897	6.68126	6.6833	6.83572	6.47987	6.65084	6.64313	6.65505	6.80435	6.5486	6.96494	6.39478	6.80562	7.06953	6.52459	6.85475	6.92365	6.95529	7.27365	6.98636	7.18834	7.73858	7.77074	7.62528
ENSG00000038002	8.53188	8.40525	8.58046	8.43188	8.61067	8.36682	8.71672	8.53636	8.48766	8.39131	8.59258	8.41908	8.60678	8.57576	8.58993	8.69909	8.5871	8.59684	8.4995	8.60518	8.46883	8.59054	8.55972
ENSG00000038210	9.30062	9.3371	9.31988	9.24262	9.40151	9.48645	9.48325	9.14846	9.30045	9.4601	9.4073	9.50161	9.4406	9.45477	9.30775	9.50254	9.32586	9.28206	9.31959	9.48014	9.05545	9.14793	9.15392
ENSG00000038219	9.66268	9.66451	9.64334	9.71202	9.58825	9.59476	9.64833	9.59471	9.65535	9.66848	9.5302	9.72372	9.70259	9.75443	9.63126	9.57962	9.65965	9.56587	9.57603	9.73255	9.49224	9.80747	9.82228
ENSG00000038274	9.45507	9.64062	9.41384	9.48617	9.6236	9.62259	9.58455	9.66388	9.53909	9.66276	9.64344	9.66891	9.49412	9.62731	9.66332	9.58875	9.58935	9.49263	9.51828	9.50783	9.41608	9.353	9.4107
ENSG00000038358	10.2357	10.3216	10.3046	10.2389	10.172	10.2573	10.2275	10.2545	10.3213	10.2957	10.2223	10.2067	10.2588	10.2152	10.2595	10.303	10.103	10.2423	10.1643	10.1993	10.2266	10.1137	10.0483
ENSG00000038382	11.4481	11.2746	11.4039	11.3016	11.0892	11.1357	11.077	11.2363	11.1943	11.1619	11.1426	11.2501	11.2414	11.2496	11.1443	11.1737	11.1085	11.2905	11.2298	11.2469	11.5407	11.6092	11.5461
ENSG00000038427	11.6067	10.9474	11.3207	10.9951	10.6742	10.1938	10.2655	10.8076	10.9254	10.5299	10.3483	11.0316	10.8785	11.2626	10.8474	10.7495	11.0363	10.9865	10.8122	10.9963	12.1437	12.2982	12.1315
ENSG00000038532	9.59674	9.41853	9.56359	9.42068	9.3624	9.27731	9.32393	9.38763	9.50644	9.29249	9.39038	9.41238	9.56123	9.37578	9.3891	9.20789	9.30846	9.50729	9.39694	9.48572	9.6798	9.78993	9.70685
ENSG00000038945	3.37086	3.24503	2.6476	3.80955	3.59143	3.09234	3.42774	3.77179	3.96051	3.9528	3.98614	4.75948	4.01346	4.46525	4.23448	2.9629	4.37733	3.40087	3.9978	4.21176	3.19336	2.84578	2.84868
ENSG00000039068	12.0755	12.0724	12.0476	12.1354	12.2508	12.1107	12.1353	12.1263	12.0911	12.1586	12.1318	12.2366	12.2183	12.2183	12.2032	12.1381	12.1898	12.2248	12.1728	12.2276	12.1729	12.0984	12.1003
ENSG00000039123	9.36848	9.48346	9.41384	9.62217	9.66705	9.74155	9.6148	9.49488	9.50644	9.5711	9.55888	9.59176	9.57276	9.62205	9.50202	9.63176	9.71352	9.5798	9.56894	9.63548	9.53608	9.7386	9.72693
ENSG00000039139	7.80807	7.52314	7.54746	7.50661	7.49084	7.50534	7.76039	7.2763	7.0227	7.48903	7.54754	7.2487	7.37182	7.1778	7.32463	7.41719	7.31527	7.3921	7.39855	7.40801	7.65092	7.94842	7.81827
ENSG00000039319	9.82011	9.69013	9.73979	9.79894	9.79332	9.72881	9.76981	9.76879	9.81553	9.5711	9.7501	9.76756	9.79077	9.81556	9.67516	9.7422	9.77815	9.68926	9.6302	9.91182	9.61587	9.66901	9.72459
ENSG00000039523	10.4396	10.3982	10.5322	10.4058	10.203	10.1858	10.1911	10.1843	10.3017	9.9849	10.3128	10.3526	10.2916	10.3716	10.251	10.2918	10.2236	10.3573	10.2322	10.2975	11.2328	11.3224	11.3088
ENSG00000039537	10.4347	10.7685	10.6273	10.8363	11.0745	11.2349	11.0493	10.8395	10.8687	10.9979	11.0405	10.7649	10.79	10.6678	10.6475	10.7705	10.6917	10.4596	10.4284	10.4977	9.54182	9.32716	9.40338
ENSG00000039560	9.40871	9.42108	9.51768	9.47448	9.44999	9.49937	9.53268	9.39895	9.40158	9.46668	9.43851	9.43747	9.51617	9.50512	9.44089	9.33913	9.49142	9.25105	9.33473	9.27844	10.0195	10.1077	10.0344
ENSG00000039650	8.20065	8.20658	8.22603	8.26549	8.20179	7.99337	8.0882	8.19581	8.14463	8.04078	8.23319	7.98393	8.06959	7.82799	8.26894	8.23843	7.99989	8.30298	8.50546	8.39192	9.16375	8.93185	8.95389
ENSG00000040199	8.16586	8.12127	8.23866	8.1745	8.07312	8.14359	7.9808	8.0712	8.07396	7.89232	8.02966	8.21258	8.11234	8.33577	8.21046	7.95204	8.14138	8.19486	8.07982	8.302	7.84466	8.12271	8.06101
ENSG00000040275	7.15323	7.2749	7.1529	7.31018	6.97279	7.27428	6.97411	7.24654	7.25666	7.21984	6.97402	7.42329	7.37182	7.14885	7.2099	7.12774	7.14648	7.06758	7.10881	6.96151	6.91873	7.14769	7.08849
ENSG00000040341	9.43329	9.37036	9.27165	9.28003	9.3956	9.42005	9.4456	9.4012	9.3519	9.30356	9.29353	9.37104	9.42839	9.39842	9.31786	9.36272	9.34793	9.258	9.22038	9.37056	8.78702	8.85921	8.83282
ENSG00000040487	8.66239	8.54752	8.50578	8.6187	8.55779	8.41762	8.42963	8.4778	8.50015	8.35631	8.45286	8.54197	8.37186	8.55752	8.29476	8.72249	8.46678	8.85925	8.80743	8.89526	9.4952	9.49433	9.46799
ENSG00000040531	8.75891	8.72736	8.61961	8.80756	8.77191	8.42215	8.77503	8.74938	8.60797	8.69006	8.63271	8.59565	8.87541	8.72702	8.86274	8.84331	8.82595	9.06742	9.08513	9.00813	9.7209	9.74381	9.73862
ENSG00000040608	7.18831	6.57746	7.29675	7.21504	7.14656	7.14868	6.9865	7.05382	7.14442	7.20417	7.47715	7.29936	7.08034	7.05837	6.82671	6.81587	6.68947	7.21771	6.61973	6.70504	7.39568	7.39318	7.14579
ENSG00000040633	9.67304	9.56187	9.43229	9.25974	9.31993	9.36933	9.47228	9.34146	9.54714	9.52457	9.41569	9.37508	9.57276	9.60794	9.65935	9.49673	9.55181	9.68023	9.55752	9.64049	10.0947	10.0822	10.1235
ENSG00000040731	8.02416	7.94097	7.91583	7.83383	7.78839	7.82568	7.70898	7.95334	8.00551	7.96846	7.81183	7.74171	7.77584	7.86405	7.70953	7.74562	7.5018	7.5813	7.59572	7.7423	6.57085	5.99238	6.08447
ENSG00000040933	8.48561	8.44592	8.5436	8.58648	8.40364	8.26961	8.46548	8.60441	8.37912	8.18339	8.4282	8.34868	8.35416	8.5052	8.36468	8.43742	8.59942	8.50635	8.51435	8.69142	8.53658	8.54046	8.65654
ENSG00000041353	5.02411	4.16687	4.51996	5.69037	4.39904	4.55988	4.75645	4.71799	5.41355	4.65201	4.30789	4.92347	4.26153	5.22598	4.23448	4.81699	5.03881	4.99521	4.76593	4.69547	7.96928	8.46034	8.16514
ENSG00000041357	10.4932	10.3982	10.454	10.4572	10.607	10.5323	10.5443	10.5117	10.5809	10.4804	10.5379	10.5475	10.4779	10.5155	10.5565	10.5575	10.5687	10.5316	10.5573	10.5169	10.5104	10.4195	10.4698
ENSG00000041515	5.6789	5.51815	5.57042	5.5637	5.05124	5.46014	5.72951	5.11926	5.61076	4.34436	4.98568	5.16114	6.0365	5.43222	5.28079	5.28052	5.45494	5.3477	5.7986	5.2443	4.93673	4.17149	4.48332
ENSG00000041802	9.15746	9.01437	9.05055	9.00736	8.91393	8.94719	8.99951	9.04277	9.13141	8.97484	9.00205	9.05959	9.10973	9.1727	9.04416	9.03975	9.22083	9.32075	9.24143	9.27629	9.43935	9.43912	9.55517
ENSG00000041880	5.92063	5.97246	5.79228	5.76903	6.02932	6.23289	6.13774	5.63013	6.22651	6.13353	5.89235	6.09569	5.56864	5.79804	5.57856	5.93548	6.26369	6.23444	6.14235	6.07528	6.84629	6.68814	6.85073
ENSG00000041982	7.01674	6.15524	6.56856	6.831	6.23578	6.01026	6.32503	6.50253	6.5486	6.55992	5.89235	6.32814	6.33611	6.72091	6.6298	6.55788	6.4384	6.28974	5.96348	6.0554	8.41036	8.71262	8.40697
ENSG00000041988	7.26701	7.31936	7.17059	7.18667	7.24542	7.43534	6.99879	7.48609	7.31439	7.29569	7.34286	7.29936	7.40659	7.33167	7.24211	7.27067	7.21211	7.16692	7.29229	7.34391	7.22762	7.26843	6.73414
ENSG00000042062	4.5357	4.8513	4.34409	4.59389	4.59173	5.05598	5.02024	4.07244	4.63999	3.9528	5.03006	4.92347	4.65764	4.40124	4.47026	4.35189	4.03446	4.22139	4.06389	4.13808	1.31112	2.99323	2.84868
ENSG00000042088	7.90968	7.92667	7.68918	7.80612	7.84623	7.7339	7.58407	7.88416	7.79182	7.47605	7.79264	7.71956	8.03111	7.8581	7.9166	7.99111	7.93009	8.06616	7.83214	7.77912	8.26509	8.20444	8.34104
ENSG00000042286	9.9671	10.0514	10.0275	9.93949	10.0677	10.0445	10.0057	10.021	9.97319	10.063	10.1526	10.1795	10.0952	10.0619	10.2706	10.3606	10.1764	10.3262	10.2589	10.2425	10.1559	10.1545	10.0709
ENSG00000042317	7.24496	7.16957	7.22238	7.20093	7.36457	7.09294	7.42017	7.21616	7.2954	7.17233	7.06214	7.28937	7.30889	7.21551	7.32463	7.27972	7.35456	7.08331	7.24323	6.95079	7.08536	6.93614	6.7801
ENSG00000042429	9.02349	9.18894	8.94767	8.78881	9.20463	9.11528	8.98951	8.97607	9.29269	8.793	9.11321	9.14964	9.26518	9.03375	9.01258	9.11031	9.22558	9.03643	9.16398	9.23726	9.03549	9.15112	9.173
ENSG00000042445	10.8516	10.8129	10.7248	10.901	10.9943	10.9915	11.0172	10.9559	10.8387	10.8497	10.9589	10.942	10.9227	10.96	10.9205	10.9183	10.9452	10.8757	10.8694	10.833	10.5293	10.5315	10.5112
ENSG00000042493	8.90317	8.99052	9.02889	8.88024	8.78183	8.96282	8.94022	8.87463	8.87743	8.95158	9.02416	8.89477	8.95977	9.12644	8.89685	9.02369	9.119	9.22646	9.13977	8.93659	9.12408	9.12613	9.106
ENSG00000042753	9.69557	9.6602	9.68393	9.61952	9.52275	9.58267	9.6811	9.71729	9.45389	9.70232	9.7501	9.47982	9.76421	9.49557	9.60467	9.57962	9.50457	9.58534	9.55465	9.32691	9.8688	9.70556	9.70922
ENSG00000042781	4.80048	5.39894	4.77248	5.51888	6.00695	5.7177	6.06948	5.63013	5.37789	6.16622	5.79283	5.16114	5.05832	4.94093	5.36119	5.24403	5.30257	4.70096	4.64161	4.79471	3.50708	3.24941	2.15262
ENSG00000042832	4.29939	4.96759	4.40512	4.75716	3.46585	4.42191	3.9164	4.77469	3.8607	4.34436	3.79363	3.91933	4.10098	4.46525	4.47026	4.04751	4.58977	4.16335	3.42414	4.84189	3.07154	3.56445	3.50322
ENSG00000042980	4.97137	4.78944	4.90517	4.30805	4.17659	3.68155	4.11005	4.82924	4.81017	4.09546	3.57141	4.28374	4.87184	4.79911	4.541	4.6031	4.65416	4.57305	4.72567	4.28186	6.14207	5.68046	5.33229
ENSG00000043093	9.71576	9.71114	9.64334	9.63797	9.67239	9.75957	9.75901	9.6469	9.72264	9.55884	9.65412	9.81533	9.685	9.89904	9.63328	9.62823	9.72668	9.65281	9.68241	9.71365	9.507	9.60739	9.54455
ENSG00000043143	7.93056	7.394	7.71352	7.68963	7.83992	7.47076	7.83081	7.6466	7.7436	7.90206	7.49309	7.8408	7.74221	7.57592	7.49467	7.66508	7.61935	7.54766	7.52123	7.62583	8.29261	8.40873	8.4331
ENSG00000043514	7.47075	7.56989	7.71352	7.49509	7.44996	7.21285	7.58407	7.50297	7.7782	7.46295	7.6435	7.48587	7.60674	7.43118	7.44941	7.38403	7.66694	7.63033	7.69811	7.56387	7.48189	7.52021	7.36672
ENSG00000044090	10.0441	10.2294	10.1157	10.317	10.1389	10.1562	10.0179	10.1999	10.1207	10.1797	10.1438	10.1074	10.2274	10.0683	9.99477	10.1149	10.0355	10.1281	9.9966	10.1306	9.60219	9.67175	9.71278
ENSG00000044115	12.7931	12.7799	12.7765	12.7483	12.7622	12.7243	12.71	12.7322	12.8143	12.7576	12.776	12.8323	12.8183	12.8629	12.805	12.7615	12.8173	12.8523	12.8064	12.8324	13.0206	13.0857	13.0042
ENSG00000044446	10.6077	10.6903	10.6676	10.6053	10.6382	10.8089	10.7743	10.7362	10.7218	10.7841	10.7501	10.6891	10.6681	10.5802	10.6909	10.729	10.6099	10.5107	10.6128	10.6701	9.82706	9.77089	9.71278
ENSG00000044459	7.69062	7.80689	7.88937	7.90523	8.06773	7.85948	7.85128	7.79103	7.92132	7.96846	7.82448	7.93991	7.749	7.79723	7.94296	7.77789	8.13011	7.76814	7.6929	7.80911	7.65622	7.66472	7.60499
ENSG00000044574	13.7806	13.6751	13.7322	13.7493	13.7164	13.7125	13.7241	13.7628	13.7867	13.7608	13.6878	13.6664	13.6816	13.7701	13.5902	13.536	13.5626	13.3427	13.2512	13.2442	13.6696	13.8085	13.9202
ENSG00000046604	10.9806	10.8399	10.9204	10.8857	10.69	10.6701	10.6783	10.8244	10.8452	10.6388	10.7242	10.8734	10.8185	11.0318	10.8552	10.7463	10.8785	10.9191	10.826	10.8725	11.6873	11.8143	11.7761
ENSG00000046647	8.17755	8.20658	8.18745	8.14531	7.94326	8.14359	8.34073	8.19061	8.37912	7.96846	8.02419	8.25426	8.18423	8.17281	8.15515	8.11249	8.3885	8.31302	8.24915	8.19706	8.29941	8.38889	8.21619
ENSG00000046651	9.51157	9.57568	9.54506	9.32629	9.42279	9.3903	9.26665	9.36704	9.42797	9.20864	9.33838	9.29746	9.38066	9.34421	9.56065	9.37332	9.4444	9.41081	9.43177	9.5546	9.32238	9.23571	9.14341
ENSG00000046889	3.37086	3.57338	1.46227	2.76282	2.32758	1.65584	4.3591	2.87372	3.37366	3.41368	3.446	3.10575	2.59694	3.11581	3.84477	4.12984	2.43195	2.78337	3.61256	3.89134	3.19336	2.03367	2.98051
ENSG00000047056	8.87831	9.03118	8.98708	9.00329	9.0892	9.10204	9.15581	8.94734	8.99977	9.02918	9.11452	8.96234	8.97433	9.02656	9.02578	9.00472	8.95615	8.86609	9.04887	8.97148	8.86233	8.94776	8.87983
ENSG00000047188	9.75334	9.85774	9.79215	9.88975	9.87433	9.90907	9.88516	9.73168	9.84684	9.848	9.81178	9.82919	9.78748	9.86978	9.73674	9.734	9.86573	9.72731	9.75672	9.85976	9.63077	9.57994	9.56176
ENSG00000047230	10.1562	10.133	10.1728	10.2153	10.3165	10.2394	10.2794	10.1817	10.257	10.1308	10.2648	10.2988	10.2504	10.157	10.2926	10.2161	10.2922	10.1839	10.2518	10.2092	9.99981	10.0191	9.98223
ENSG00000047249	9.17214	9.05437	8.99951	8.98693	9.03219	9.20027	9.06816	9.20886	9.14473	8.94216	8.83074	9.10015	9.14876	9.11401	9.21073	9.15972	9.15838	9.13504	9.07715	8.97413	9.27314	9.41153	9.49166
ENSG00000047315	10.8983	10.7453	10.8315	10.7733	10.8015	10.8557	10.827	10.7948	10.8647	10.8128	10.7682	10.818	10.7684	10.9026	10.8103	10.824	10.8174	10.7617	10.7173	10.7907	10.9476	10.988	10.9552
ENSG00000047346	8.95502	9.02112	9.16526	9.06695	9.03771	9.30456	9.19103	9.04277	9.21462	9.1809	9.15266	9.09443	9.08042	9.07095	9.06231	8.90012	9.18314	8.87967	8.92322	9.01844	8.78934	8.87118	8.8756
ENSG00000047365	8.1422	8.14616	8.37076	7.91391	8.17696	8.16537	8.1935	8.04838	8.03443	8.19135	7.92191	8.0024	7.98008	8.21995	8.18307	8.16224	8.23382	8.03817	8.03521	8.12737	8.44143	8.60781	8.77022
ENSG00000047410	10.7977	10.7615	10.7248	10.869	10.8588	10.901	10.8123	10.7101	10.8759	10.9197	10.8094	10.8574	10.8249	10.8727	10.7914	10.9125	10.8969	10.8523	10.8266	10.9152	10.779	10.8048	10.8696
ENSG00000047457	11.4019	11.2978	11.2955	11.2662	11.3368	11.3289	11.3342	11.3649	11.3892	11.4157	11.2301	11.2774	11.2792	11.389	11.2588	11.1454	11.3142	11.1963	11.0805	11.0816	11.0361	10.9899	11.1061
ENSG00000047578	8.74326	8.73559	8.7635	8.86241	8.6509	8.60063	8.76787	8.66191	8.63842	8.80873	8.76004	8.59565	8.75579	8.72048	8.71376	8.85243	8.75798	8.7697	8.73829	8.77887	8.76744	8.78525	8.66636
ENSG00000047579	7.15323	6.7002	7.02262	6.84922	6.83989	6.93706	6.85752	6.8179	6.97577	6.60832	6.85571	6.79154	6.87221	6.84639	6.96177	6.98022	7.15763	7.2319	7.06107	7.26822	7.85854	7.8308	7.68931
ENSG00000047597	4.21116	3.04778	3.82432	3.27513	2.32758	2.89786	4.11005	2.38397	3.63764	3.79447	3.79363	3.69556	4.18349	4.26402	4.14647	3.96021	4.12811	4.22139	4.30156	4.58888	5.03777	4.81129	5.28206
ENSG00000047617	3.66462	4.26104	3.1537	2.76282	4.00662	3.09234	3.69266	2.87372	3.51168	3.61661	3.79363	3.56915	3.82069	3.64421	3.60168	2.54965	3.9343	3.58899	2.80535	2.70834	2.6287	3.46689	3.31621
ENSG00000047621	7.99142	8.18271	8.17874	7.92254	8.25021	8.0235	7.9175	7.75625	8.07952	8.32769	8.04055	7.95263	8.03111	8.01067	8.17197	8.21032	8.31572	8.31968	8.24915	8.20159	8.3028	8.45399	8.42155
ENSG00000047634	9.07861	9.23637	9.12501	9.41763	9.39915	9.54162	9.47202	9.32019	9.48774	9.44686	9.4052	9.3295	9.16408	9.1655	9.12122	9.14988	9.13036	8.98605	9.19795	9.28272	8.67864	8.64731	8.75189
ENSG00000047644	9.89105	9.73389	9.71741	9.76815	9.4989	9.57456	9.5369	9.55681	9.72441	9.61025	9.56832	9.71255	9.5993	9.70226	9.63732	9.58693	9.67136	9.54044	9.54311	9.62372	9.80214	9.81369	9.74675
ENSG00000047849	12.4909	12.4786	12.4946	12.42	12.3783	12.4914	12.4508	12.4247	12.3975	12.5165	12.5127	12.4631	12.5144	12.449	12.4408	12.4175	12.4092	12.5387	12.4712	12.4499	12.4127	12.3981	12.3401
ENSG00000047932	9.76113	9.69013	9.73683	9.72687	9.94516	9.82261	9.90488	9.89724	9.82052	9.82258	9.82915	9.82228	9.95832	9.89615	9.90543	9.80149	9.6926	9.78979	9.80461	9.8825	9.56458	9.60165	9.59171
ENSG00000047936	3.5252	4.34944	4.62633	4.19863	4.81416	4.90879	4.50405	4.65897	4.14152	4.82581	5.07311	4.01942	4.5373	4.26402	4.05274	4.2816	3.58383	3.97374	3.92855	4.28186	2.79189	3.127	3.21276
ENSG00000048028	8.94137	8.93088	8.6546	8.86689	8.80146	8.93456	8.93703	8.81506	8.93377	8.7667	8.7468	8.79239	8.90307	8.69401	8.84537	8.78734	8.9401	8.79858	8.90305	8.91745	8.45367	8.52842	8.44741
ENSG00000048052	7.96469	7.68478	7.84049	7.57389	7.13629	7.18112	6.88425	7.51133	7.47489	7.20417	7.57775	7.34829	7.69377	7.82799	7.54717	7.60878	7.69016	7.88946	7.70848	7.96106	9.24876	9.48968	9.3901
ENSG00000048140	9.67717	9.67951	9.64175	9.64059	9.54427	9.45584	9.56195	9.73883	9.58282	9.62209	9.5029	9.50593	9.48804	9.58291	9.64537	9.6632	9.49581	9.77896	9.6692	9.61186	9.79615	9.68265	9.64857
ENSG00000048162	7.70685	7.86802	8.00232	7.76833	7.71438	7.60434	7.79603	7.7492	8.02869	7.74857	7.53219	7.82013	7.74221	7.66719	8.17197	8.05043	7.76496	8.13949	8.16132	7.99276	8.36246	8.36877	8.18236
ENSG00000048342	6.90867	7.55137	7.31277	7.34911	7.3199	7.4173	7.3925	7.41653	7.2269	7.6009	7.44473	7.31913	7.4489	7.3144	7.51238	7.44961	7.38333	7.12192	7.44269	7.43903	7.13942	6.67728	6.44557
ENSG00000048392	10.7318	10.6776	10.6337	10.7322	10.7136	10.6739	10.7262	10.6498	10.6949	10.7642	10.63	10.6891	10.6189	10.713	10.6455	10.5833	10.6705	10.543	10.495	10.449	10.2934	10.4405	10.5382
ENSG00000048405	8.4475	8.31483	8.24702	8.21018	8.30624	8.39475	8.05328	8.41676	8.2271	8.42548	8.41152	8.14217	8.385	8.48218	8.232	8.31959	8.23908	8.33619	8.46017	8.55652	8.67895	8.74679	8.74958
ENSG00000048471	7.61527	7.63289	7.65189	7.60639	7.90185	7.68949	7.87813	7.89699	7.50686	7.68229	7.71999	7.76352	7.56117	7.70082	7.71719	7.41719	7.78667	7.83008	7.59013	7.71088	7.926	8.13468	8.00016
ENSG00000048544	9.40028	9.30153	9.33368	9.30994	9.29014	9.229	9.3385	9.3899	9.33805	9.41319	9.37325	9.38215	9.28346	9.35481	9.39387	9.34345	9.3308	9.47183	9.45812	9.47774	9.54897	9.67718	9.678
ENSG00000048649	9.46046	9.44275	9.48898	9.48908	9.3319	9.38849	9.26092	9.32731	9.39044	9.33626	9.28204	9.48901	9.36306	9.51224	9.45424	9.36697	9.33817	9.24232	9.34125	9.33336	9.40193	9.41807	9.38353
ENSG00000048707	10.7613	10.6199	10.6072	10.7285	10.6373	10.6227	10.5856	10.6143	10.574	10.6197	10.5805	10.6815	10.6681	10.7253	10.6664	10.5924	10.6715	10.7101	10.6469	10.7008	10.7686	10.9388	10.8264
ENSG00000048740	8.11814	7.83778	7.96226	7.86997	7.87121	8.0762	7.81004	7.9223	7.93365	8.03194	7.98527	7.97773	7.99729	7.9945	7.98163	7.85857	8.16919	7.88946	7.81785	7.88427	8.51921	8.66116	8.65407
ENSG00000048828	11.3553	11.4417	11.4278	11.5383	11.5693	11.6079	11.6779	11.5903	11.5467	11.6398	11.5465	11.5621	11.534	11.5249	11.4422	11.4782	11.5248	11.5627	11.4952	11.5118	11.3928	11.3746	11.3151
ENSG00000048991	9.39125	9.36122	9.3376	9.34567	9.45413	9.45363	9.37666	9.44335	9.36562	9.40637	9.4052	9.42156	9.45105	9.41277	9.41052	9.41085	9.36246	9.33396	9.40333	9.4036	9.03929	9.11006	9.06389
ENSG00000049089	4.5357	5.22292	4.57412	4.40975	4.09411	4.34764	3.80886	4.16018	4.14152	4.82581	4.50942	4.28374	4.92077	4.64182	4.31743	4.81699	5.2199	4.22139	4.84323	3.89134	4.75079	3.89967	4.34337
ENSG00000049130	7.44197	7.46497	7.54068	7.85202	7.9079	7.78404	7.89137	7.72782	7.54087	7.91174	7.7797	7.40491	7.59171	7.81576	7.70953	7.71927	7.843	7.88048	7.70848	7.79119	7.77319	7.54433	7.43727
ENSG00000049167	6.76112	6.61361	6.89011	6.50307	7.12595	6.73339	6.85752	6.66132	6.90237	6.94624	6.77976	6.44073	7.08034	7.07897	7.15107	6.87256	7.24384	6.95071	6.98636	7.10484	6.72213	6.927	6.98239
ENSG00000049192	6.63114	6.90368	6.96297	6.95395	6.74846	6.38916	6.74532	6.74883	6.90237	6.48413	6.71327	6.71897	6.72847	6.50949	6.64594	6.64444	6.42	6.66921	6.81466	6.47002	4.71055	5.39237	5.14826
ENSG00000049239	11.9159	12.0068	11.9764	11.9839	11.9739	12.0321	11.9743	11.9617	11.9118	11.9642	11.9696	11.8705	11.992	11.8571	11.8246	11.8221	11.7769	11.8197	11.7476	11.7839	11.3598	11.3009	11.2211
ENSG00000049245	10.1309	10.071	10.1451	9.9731	10.1234	10.2056	10.1641	10.0313	10.1153	10.0233	10.0859	10.1173	10.2396	10.1473	10.0042	10.1073	10.1723	10.0867	10.0495	10.0336	10.0928	10.1118	10.0315
ENSG00000049246	6.05343	6.42307	6.13625	6.40795	5.98423	6.27357	6.70089	6.30496	5.98719	6.48413	6.49317	6.11844	6.2621	5.84691	5.50968	5.7132	5.3422	5.67296	5.81788	5.88569	3.59814	3.97257	3.66875
ENSG00000049249	8.03705	7.91223	8.12985	7.68963	7.46645	7.60434	7.55108	7.52792	7.49167	7.15615	7.54754	7.57902	7.45722	7.85213	7.47673	7.37562	7.45738	7.3984	7.31282	6.98271	8.4009	8.72849	8.56761
ENSG00000049323	8.21773	7.88291	8.10247	7.91391	7.56926	7.69699	7.50875	7.9223	7.98195	7.33936	7.65771	7.96523	7.78248	8.12902	8.13242	7.96891	8.12444	7.98471	7.88336	7.84428	9.42543	9.39173	9.22377
ENSG00000049449	11.3963	11.2921	11.3721	11.2899	11.1755	11.1543	11.0667	11.2789	11.3064	11.2024	11.1934	11.319	11.375	11.4269	11.5076	11.3413	11.4942	11.5655	11.5289	11.5876	12.611	12.7144	12.7271
ENSG00000049541	7.76223	7.56989	7.65189	7.70971	7.97857	7.8325	7.79603	7.71339	7.73658	7.75933	7.63634	7.69707	7.46549	7.68746	7.87613	7.71927	7.58673	7.73366	7.6929	7.61907	8.08004	8.26737	8.12296
ENSG00000049618	10.0505	10.0164	10.0408	10.0926	9.95834	9.88137	9.9467	9.91941	9.9491	10.0455	9.97249	10.0012	10.075	10.0632	10.0428	10.053	9.87926	10.0361	9.95258	10.1294	10.083	10.1328	9.97039
ENSG00000049656	10.7437	10.5839	10.6707	10.6146	10.7118	10.4984	10.5795	10.6564	10.6062	10.6931	10.6497	10.5837	10.617	10.688	10.6575	10.5969	10.6773	10.6179	10.599	10.605	10.849	10.7758	10.8286
ENSG00000049759	11.276	11.3164	11.2769	11.269	11.3	11.309	11.2508	11.2756	11.2686	11.2504	11.2361	11.3051	11.3272	11.3108	11.376	11.294	11.2936	11.4002	11.3542	11.281	11.2834	11.2655	11.2606
ENSG00000049769	6.90867	6.82878	6.81338	7.03577	6.77518	7.29419	7.27619	6.8179	6.93954	7.08951	7.09385	6.54517	7.04767	6.73396	6.86857	6.92365	6.54412	6.81771	6.70504	7.01394	6.48994	6.63298	6.5233
ENSG00000049860	10.4755	10.4628	10.4358	10.3284	10.4583	10.5091	10.4855	10.3809	10.5321	10.4804	10.4549	10.4941	10.4427	10.4984	10.5328	10.4272	10.5392	10.5579	10.6177	10.6015	10.9323	10.9624	10.9672
ENSG00000049883	7.33121	7.72664	7.49929	7.55181	7.72812	7.83929	7.84449	7.45173	7.61932	7.84261	7.4529	7.68187	7.84084	7.48621	7.72481	7.50464	7.69782	7.42335	7.63429	7.56387	7.37651	7.14769	7.0135
ENSG00000050030	3.37086	3.41853	3.0039	3.95122	3.1762	3.41682	3.42774	3.97901	2.63293	3.79447	2.31011	3.10575	3.7137	2.94675	3.84477	2.77102	3.58383	3.06276	3.69828	3.59351	4.04912	3.97257	3.95183
ENSG00000050130	8.90668	9.04116	8.95172	9.04736	9.07582	9.04149	8.96861	8.76696	8.93069	9.09009	8.89813	9.04778	9.01995	9.13138	9.2296	9.05826	9.06081	8.98395	8.90079	9.02867	9.05746	9.06493	9.21208
ENSG00000050165	6.79186	7.01598	7.06106	6.45629	6.93774	6.76226	6.43762	6.67628	6.98765	6.8286	6.44481	6.52828	6.42358	6.70774	6.88226	6.41744	6.45656	6.30324	6.35524	5.76849	6.44158	6.68814	6.88479
ENSG00000050327	10.2859	10.0846	10.2077	10.2601	9.94269	10.1228	10.0701	10.0772	10.2333	10.1432	10.2273	10.2319	10.0784	10.2348	10.1855	10.156	10.2734	10.2064	10.2414	10.3696	10.7833	10.7953	10.7722
ENSG00000050344	8.09367	7.73487	7.77262	7.68963	7.50687	7.59635	7.69394	7.63133	7.67179	7.77	7.41993	7.52896	7.55344	7.65352	7.6225	7.60159	7.63539	7.69321	7.73407	7.85006	8.34285	8.26375	8.4099
ENSG00000050393	8.48561	8.33662	8.61961	8.38893	8.41643	8.58051	8.59657	8.68797	8.66456	8.48501	8.51664	8.64741	8.48192	8.51657	8.57736	8.60148	8.6437	8.70251	8.72558	8.58105	9.08526	9.13211	9.14341
ENSG00000050405	10.454	10.3319	10.396	10.3381	10.329	10.2484	10.16	10.2644	10.3679	10.2895	10.2879	10.355	10.3441	10.3923	10.3129	10.3063	10.3136	10.3113	10.2376	10.3847	10.8537	10.958	10.981
ENSG00000050426	8.98526	9.03784	9.01916	9.09394	9.24545	9.13829	9.16674	9.04277	9.02015	9.1567	9.13753	8.96862	9.02556	9.03713	9.15262	9.184	9.21284	9.17047	9.17384	9.29336	8.79657	8.90649	8.86498
ENSG00000050748	9.5902	9.46626	9.69161	9.60082	9.68653	9.7178	9.74449	9.76705	9.65907	9.7051	9.88005	9.75127	9.64915	9.78767	9.77209	9.69058	9.74158	9.64355	9.64782	9.68645	9.50259	9.3632	9.37819
ENSG00000050820	11.4121	11.2519	11.3365	11.1656	10.8774	10.8448	10.9649	11.0946	11.1587	11.0752	11.0951	11.1453	11.2112	11.2311	11.0923	11.1941	11.0911	11.3686	11.2325	11.1735	11.9872	11.976	11.8399
ENSG00000051009	9.39876	9.47612	9.38572	9.34887	9.54038	9.47559	9.56402	9.50957	9.39491	9.46996	9.58329	9.47321	9.52015	9.37786	9.61904	9.47918	9.50239	9.45078	9.49152	9.5913	9.43009	9.36996	9.3342
ENSG00000051108	11.3002	11.3225	11.2693	11.2741	11.3091	11.3163	11.3112	11.3416	11.2373	11.3055	11.3608	11.2339	11.2881	11.3431	11.3016	11.3029	11.2929	11.1055	11.119	11.143	10.9849	11.1187	11.2847
ENSG00000051128	7.94431	7.92667	7.96647	7.72951	7.61435	7.3404	7.4844	7.57657	7.62693	7.21984	7.58907	7.6274	7.76248	7.67398	7.79885	7.98559	7.80805	8.10522	8.01731	7.95994	8.93181	8.95902	8.80843
ENSG00000051180	4.67415	3.57338	4.34409	4.90382	4.00662	3.55525	4.11005	4.77469	4.05385	3.79447	4.07355	4.01942	4.01346	4.52654	4.60844	4.20771	4.52238	4.10287	4.76593	4.47379	4.23083	4.04197	4.0147
ENSG00000051341	5.42802	4.51148	4.90517	4.75716	4.70723	4.85619	4.28076	4.88181	4.81017	4.22527	4.37824	5.43928	4.65764	4.52654	4.541	5.08803	5.30257	4.22139	4.40716	4.13808	3.91387	4.17149	3.8861
ENSG00000051382	9.48124	9.35856	9.32975	9.57369	9.42701	9.46025	9.52208	9.44771	9.54513	9.38916	9.45284	9.45545	9.55156	9.64296	9.6026	9.44743	9.54121	9.32075	9.40333	9.3858	9.65085	9.77472	9.71278
ENSG00000051523	10.5538	10.6658	10.7942	10.641	10.5443	10.4548	10.5795	10.6798	10.6071	10.6167	10.6209	10.4645	10.6068	10.5537	10.5252	10.7841	10.6558	10.7997	10.6953	10.4875	10.9589	10.8914	10.778
ENSG00000051596	8.78524	8.93181	8.85664	8.75365	8.59781	8.62426	8.62716	8.71016	8.87576	8.57318	8.79582	8.68317	8.77358	8.61018	8.75794	8.77559	8.45711	8.71335	8.55032	8.63364	9.04264	9.12603	9.11527
ENSG00000051620	9.92785	9.84069	9.82881	9.85185	9.7213	9.74155	9.92272	9.78613	9.93383	9.82002	9.7958	9.66312	9.9137	9.87126	9.89534	9.83868	9.94347	9.96883	9.81304	9.78025	10.1634	10.1208	9.99496
ENSG00000051825	8.11814	8.25887	8.10707	8.31221	8.15169	8.26961	8.41136	8.16962	8.2715	8.17538	8.23793	8.36304	8.17201	8.19185	8.2599	8.28129	8.13722	8.03813	8.21683	8.36068	7.59675	7.82204	7.64529
ENSG00000052126	9.58801	9.57339	9.63381	9.84732	9.62176	9.68989	9.69815	9.71729	9.78522	9.53713	9.64701	9.75672	9.83132	9.55008	9.78308	9.69228	9.70405	9.61135	9.71491	9.67997	9.29542	9.31845	9.25666
ENSG00000052344	10.0265	10.1955	10.1485	10.1248	10.0141	10.2534	10.2857	10.0925	10.046	10.0824	10.2787	10.2089	10.183	10.0644	10.1556	10.1572	10.2276	10.2911	10.3108	10.07	10.2263	10.2792	10.1931
ENSG00000052723	9.42596	9.49319	9.49855	9.51213	9.62727	9.53745	9.55781	9.46935	9.47092	9.44686	9.41986	9.56302	9.46348	9.53897	9.55639	9.46933	9.46024	9.44623	9.51533	9.60675	9.50259	9.49742	9.6007
ENSG00000052749	9.06294	8.75998	8.85658	8.71125	8.66882	8.61653	8.713	8.72441	8.75072	8.71237	8.75343	8.90134	8.83131	8.849	8.87989	8.87349	9.00326	9.25279	9.1813	9.19913	9.98513	10.1979	10.2408
ENSG00000052795	9.8257	9.77637	9.80636	9.89195	10.0825	9.9473	9.87519	9.95664	9.90593	9.83026	9.88308	9.9371	9.86765	9.98889	9.96453	9.85843	9.88263	9.98985	9.89248	9.99765	10.5501	10.6242	10.5901
ENSG00000052802	12.9559	13.1113	13.0115	13.2039	13.5065	13.6145	13.5698	13.2528	13.2797	13.3657	13.4647	13.2209	13.2209	13.1765	12.9876	12.9208	12.9664	12.5298	12.5867	12.6143	12.0606	11.9273	11.7908
ENSG00000052841	10.3839	10.2879	10.3559	10.1887	10.3017	10.3624	10.4401	10.2767	10.2981	10.3915	10.3384	10.4102	10.3763	10.4279	10.4271	10.4373	10.3626	10.5048	10.592	10.6312	10.8958	11.0435	11.0936
ENSG00000053254	10.3989	10.5163	10.423	10.4617	10.5208	10.5417	10.5275	10.5396	10.4432	10.5236	10.5147	10.52	10.5955	10.5117	10.4988	10.4653	10.5285	10.4291	10.387	10.5114	10.1285	10.2657	10.3043
ENSG00000053328	4.21116	3.41853	3.73204	3.47608	4.00662	3.90516	2.6832	3.77179	3.96051	4.22527	3.446	2.91102	3.7137	4.26402	4.31743	3.28375	1.67722	4.10287	3.61256	3.0671	3.98308	3.56445	3.21276
ENSG00000053371	8.92066	9.13431	9.01894	8.97038	9.03219	9.00873	9.02676	8.95641	8.78158	8.92793	9.05938	8.8878	8.82168	9.05544	8.96597	9.11998	9.00635	9.00681	8.93871	8.99251	8.68416	8.61066	8.60384
ENSG00000053372	8.43294	8.29271	8.46694	8.43188	8.10507	8.25952	8.18815	8.32482	8.41475	8.07563	8.35158	8.33417	8.40233	8.41083	8.56892	8.59425	8.62374	8.68457	8.63881	8.59144	9.15065	8.91345	8.88825
ENSG00000053501	7.56276	7.22903	7.04197	7.11319	7.41641	7.10426	7.23523	7.14267	7.44935	7.43638	7.41993	7.14172	7.31805	7.39877	7.10873	7.44961	7.3252	7.49569	7.44269	7.19744	7.38932	7.13186	7.2798
ENSG00000053524	3.5252	3.04778	3.52763	1.2909	2.0053	4.62421	3.27447	2.38397	4.22417	3.9528	3.57141	2.68585	3.18269	3.64421	3.46282	3.42086	4.37733	4.33091	3.9978	4.41261	5.00487	4.23214	4.52711
ENSG00000053747	9.97382	9.7942	9.81201	9.82218	9.66169	9.69364	9.59874	9.79473	9.72796	9.73265	9.70119	9.88332	9.90156	9.85343	9.95485	9.9505	9.8103	10.0461	10.0071	10.0811	10.4298	10.5118	10.3499
ENSG00000053770	9.16335	9.17419	9.21299	9.2733	9.26679	9.36228	9.18835	9.31781	9.21714	9.24736	9.21886	9.25446	9.32495	9.31845	9.25349	9.20789	9.36967	9.27523	9.12243	9.2149	9.04537	9.04394	9.04142
ENSG00000053900	9.26272	9.30706	9.36475	9.35526	9.47262	9.70855	9.62672	9.50748	9.48355	9.48947	9.52051	9.51882	9.49412	9.30976	9.47517	9.53689	9.5707	9.40299	9.53148	9.56869	9.09897	8.82762	8.91733
ENSG00000053918	5.94819	6.05364	6.13625	6.10853	6.6652	6.77649	6.84396	6.24602	6.53247	6.45796	6.62922	6.34752	6.0365	5.72147	6.52899	6.38428	6.38248	6.27611	6.27381	5.90802	4.75079	4.96213	4.48332
ENSG00000054116	9.92265	9.86713	9.84129	9.76335	9.87433	9.82261	9.8226	9.83194	9.90593	9.72719	9.91744	9.80134	9.812	9.89904	9.89365	9.93054	9.87589	9.93454	9.82857	9.84392	10.004	10.0404	10.0709
ENSG00000054118	11.2472	11.2053	11.2392	11.246	11.1517	11.2259	11.173	11.2564	11.2466	11.3055	11.1645	11.2801	11.3084	11.2855	11.3098	11.2929	11.225	11.2286	11.2723	11.2403	10.6606	10.61	10.7208
ENSG00000054148	10.0313	10.1469	10.1693	10.012	10.1273	10.1301	10.0943	10.196	10.0825	10.1266	10.1521	10.0612	9.89698	9.9342	10.0474	10.1337	9.95898	9.94964	9.85914	9.82936	9.76701	9.64132	9.82557
ENSG00000054179	4.29939	3.71322	4.62633	4.30805	5.2548	4.68579	5.24317	4.53315	4.22417	4.90545	5.07311	4.2009	4.71425	4.19018	4.47026	4.41891	3.71035	4.65957	4.59767	4.69547	3.19336	2.49613	2.98051
ENSG00000054219	4.11717	4.58615	3.63345	3.65243	3.1762	3.79768	4.4521	4.88181	4.44701	4.22527	4.44532	3.69556	4.18349	4.19018	4.31743	2.94664	3.82667	4.48101	4.64161	4.64316	4.04912	4.54151	4.39154
ENSG00000054267	9.118	9.21052	9.16471	9.36067	9.0892	9.08928	9.06932	9.12423	9.10199	8.84957	9.08064	9.03955	9.24315	9.11366	9.14696	9.06484	9.06759	8.92841	9.13388	9.12717	8.87376	9.05657	9.14446
ENSG00000054277	10.9816	10.7461	10.7881	10.7229	10.7274	10.5623	10.5467	10.7683	10.7812	10.7046	10.7056	10.6927	10.6576	10.7564	10.6695	10.5634	10.753	10.6326	10.4897	10.5355	10.419	10.3111	10.335
ENSG00000054282	7.51749	7.56989	7.62006	7.57389	7.59198	7.60434	7.62428	7.69881	7.49999	7.35362	7.69264	7.74902	7.70079	7.791	7.69409	7.60878	7.59496	7.68807	7.69811	7.65913	7.44557	7.77074	7.63532
ENSG00000054356	2.77413	2.81922	2.42989	3.27513	1.00353	2.89786	3.69266	3.65583	2.36801	3.17748	3.446	3.91933	2.01078	2.53429	2.94184	2.28804	2.92492	2.62035	1.99824	1.91374	7.54046	7.80108	7.22768
ENSG00000054392	7.68244	7.52314	7.36747	7.42394	7.60694	7.49677	7.48274	7.46039	7.52466	7.05501	7.501	7.51187	7.55344	7.5975	7.52116	7.34148	7.48419	7.58683	7.4612	7.67225	7.75352	7.53834	7.56354
ENSG00000054523	10.717	10.5007	10.6069	10.5659	10.6706	10.6114	10.6139	10.5609	10.6052	10.6719	10.6506	10.6822	10.7565	10.7431	10.7312	10.605	10.6758	10.769	10.705	10.7418	10.5978	10.7253	10.6509
ENSG00000054611	9.07861	9.04448	8.89433	9.01141	9.02664	9.13	8.98723	8.99286	8.98207	9.01129	9.22364	9.00264	9.19921	8.97527	9.01028	9.10225	8.94975	9.0455	9.02419	8.9873	9.1048	8.99446	8.96189
ENSG00000054654	9.57039	9.78234	9.64334	9.80362	9.87587	10.0504	10.0133	9.86169	9.84358	9.72444	9.85714	9.78721	9.67433	9.69227	9.64336	9.53878	9.44667	9.33889	9.36125	9.45381	8.32296	8.45717	8.36837
ENSG00000054690	9.94504	9.99425	9.97186	9.91591	9.89275	9.89284	9.90488	10.0137	9.86144	9.81487	9.88005	9.9781	9.94656	9.75283	9.91378	10.0047	10.0126	10.0065	10.3838	10.3216	10.2702	10.1178	10.1692
ENSG00000054793	10.6597	10.6988	10.6598	10.6436	10.7023	10.6729	10.5672	10.7407	10.6071	10.6358	10.5898	10.6437	10.677	10.7845	10.5469	10.5064	10.6724	10.6942	10.6017	10.6984	10.8594	10.9314	10.7768
ENSG00000054965	9.79567	9.84259	9.83714	9.88092	9.83836	9.95044	9.91464	9.91941	9.93383	9.88776	9.69776	9.79253	9.84089	9.84443	9.68691	9.76492	9.73972	9.70968	9.56894	9.67997	9.39242	9.4066	9.4382
ENSG00000054967	5.71142	4.51148	5.02669	4.97191	4.17659	4.42191	4.43339	5.11926	5.2653	4.45436	4.44532	5.20431	4.47314	5.02828	5.05769	5.12864	4.45167	5.26732	5.26451	5.64092	6.61512	6.38848	6.4794
ENSG00000054983	9.65225	9.4363	9.46848	9.49488	9.59764	9.51642	9.55365	9.58285	9.53707	9.39607	9.47508	9.52521	9.41308	9.56659	9.51964	9.4211	9.56862	9.30237	9.306	9.34749	9.43163	9.5741	9.51632
ENSG00000055044	8.52732	8.49034	8.60992	8.48527	8.68652	8.48413	8.50908	8.39432	8.69022	8.57908	8.58517	8.68218	8.64732	8.65337	8.81358	8.66498	8.75798	8.75012	8.81944	8.76364	8.97704	8.94097	9.01859
ENSG00000055070	11.2855	11.2873	11.2543	11.2121	11.2006	11.2497	11.2763	11.2957	11.2323	11.2898	11.3032	11.2731	11.2776	11.296	11.1905	11.2066	11.1881	11.2593	11.1326	11.1066	11.3148	11.3106	11.2938
ENSG00000055118	3.00157	2.81922	3.52763	3.0416	2.81341	3.41682	2.6832	3.77179	2.85667	2.54308	3.15679	3.56915	2.59694	2.75521	2.94184	3.28375	3.11992	4.65957	3.77919	2.70834	7.43326	7.2971	7.35462
ENSG00000055130	9.82755	9.85019	9.92573	9.88313	10.0253	9.97531	9.95618	10.0019	9.98361	9.94306	9.89662	9.93069	10.0478	10.0901	10.012	10.0881	9.98318	9.9367	9.95585	10.0054	10.1513	9.97874	10.1553
ENSG00000055147	8.46668	8.47077	8.22603	8.50264	8.58447	8.54356	8.62459	8.41676	8.56501	8.47852	8.50095	8.49058	8.46964	8.64303	8.60652	8.37127	8.45778	8.44677	8.21683	8.44636	8.34613	8.54644	8.50329
ENSG00000055163	10.3128	10.2738	10.2549	10.3039	10.275	10.3169	10.4024	10.2217	10.2096	10.1857	10.3273	10.2876	10.2858	10.2233	10.2563	10.2138	10.1234	10.1441	10.1114	10.1519	9.79975	9.7109	9.73162
ENSG00000055208	9.95866	9.86713	9.85639	9.98551	10.0363	9.9567	10.0012	9.94588	10.0013	10.0076	10.0145	9.90475	9.92423	9.95863	9.96292	9.86596	10.04	9.83812	9.83095	9.95671	9.93579	10.074	10.1324
ENSG00000055211	9.18956	8.99395	9.14974	9.23917	9.33572	9.14378	9.17759	9.01068	9.21209	9.1567	9.01315	9.1087	9.19175	9.18938	9.23227	9.16948	9.20748	9.25105	9.16821	9.3186	9.18042	9.20956	9.20199
ENSG00000055332	10.1753	10.1299	10.1169	10.1689	10.3646	10.22	10.3204	10.1711	10.2545	10.0994	10.1664	10.3586	10.2635	10.3043	10.2719	10.2372	10.3297	10.1993	10.2842	10.3494	10.0287	10.0447	10.0588
ENSG00000055483	9.39125	9.37444	9.43412	9.36795	9.33123	9.3409	9.23584	9.42132	9.43883	9.34699	9.28673	9.46879	9.38937	9.4685	9.52619	9.45543	9.4444	9.61135	9.62063	9.60162	9.91048	10.1817	10.0856
ENSG00000055609	10.7584	10.5446	10.6241	10.681	10.6653	10.6937	10.662	10.6278	10.6262	10.6775	10.5579	10.6457	10.6815	10.7163	10.5671	10.4928	10.6109	10.5899	10.5857	10.6024	10.459	10.7134	10.6189
ENSG00000055917	10.6206	10.6914	10.673	10.7285	10.7569	10.7077	10.7645	10.6973	10.6656	10.6704	10.6541	10.6748	10.7457	10.8063	10.6958	10.6752	10.7472	10.6611	10.6855	10.7907	10.5957	10.5517	10.6283
ENSG00000055950	9.27092	9.30981	9.35704	9.22179	9.33348	9.31434	9.27678	9.34614	9.24463	9.2776	9.33618	9.15069	9.214	9.2314	9.35515	9.20076	9.32339	9.23705	9.28364	9.1809	9.04132	9.06701	8.95989
ENSG00000055955	11.7059	11.8648	11.8331	11.7597	11.9047	12.1122	12.0524	11.9262	11.8477	12.0027	11.9997	11.8269	11.8536	11.7404	11.7992	11.7411	11.7946	11.7537	11.7263	11.6898	11.6425	11.5866	11.547
ENSG00000055957	13.2767	13.4326	13.2914	13.4455	13.5667	13.6079	13.627	13.4505	13.4431	13.5345	13.6047	13.3462	13.3681	13.2797	13.1325	13.1497	13.1069	12.8589	12.8409	12.8254	11.9745	11.8365	11.8078
ENSG00000056050	7.80053	7.54202	7.46386	7.68963	7.59198	7.37119	7.56767	7.65418	7.50826	7.55225	7.53219	7.53742	7.58414	7.67398	7.67849	7.53517	7.77223	7.54198	7.51534	7.49175	7.22762	7.37313	7.29255
ENSG00000056097	10.7476	10.7494	10.7427	10.7395	10.7256	10.6528	10.6726	10.72	10.7164	10.6846	10.714	10.7312	10.6929	10.7915	10.6938	10.7576	10.6715	10.7709	10.7465	10.8256	10.7067	10.7771	10.729
ENSG00000056277	7.65762	7.24064	7.48522	7.28363	7.61435	7.44428	7.22481	7.14267	7.35163	6.94624	7.23324	7.66652	7.31805	7.45502	7.53855	7.35865	7.61935	7.49569	7.63972	7.7485	7.44557	7.25388	7.34242
ENSG00000056291	3.79175	4.51148	4.14375	3.95122	4.39904	3.09234	3.56627	3.97901	3.63764	2.54308	2.79469	3.43059	3.18269	2.53429	2.94184	2.28804	4.45167	3.40087	4.12707	3.47881	5.1322	5.19323	5.11994
ENSG00000056558	7.19982	7.04274	6.82459	7.01977	6.99569	7.07003	7.04692	7.07655	6.86422	7.12321	6.92785	6.84707	6.89688	7.03747	7.17696	7.05586	7.08941	6.59431	6.87112	6.95079	7.30398	7.32521	7.29255
ENSG00000056586	10.7249	10.7341	10.73	10.672	10.6971	10.6672	10.7132	10.6789	10.7111	10.7345	10.6273	10.7486	10.7692	10.7187	10.6938	10.6804	10.632	10.5802	10.5751	10.6669	10.4905	10.6446	10.6157
ENSG00000056736	8.01115	8.12753	7.9053	8.2857	8.29706	8.19744	8.02352	7.98972	8.33331	8.33489	8.12992	7.91414	8.02553	7.87587	7.73239	7.85252	7.9749	7.40468	7.46731	7.39225	5.80244	6.04404	6.46821
ENSG00000056972	7.76223	7.9761	8.01706	8.10038	8.25496	8.09334	8.21472	7.94718	8.17611	8.26868	8.17014	8.03863	8.09112	8.31855	8.00058	8.20083	8.13575	8.31968	8.01029	8.14628	8.11129	7.97528	8.16514
ENSG00000056998	10.1738	10.2639	10.0623	10.2362	10.4521	10.3927	10.2969	10.3131	10.2322	10.1797	10.3139	10.2788	10.2128	10.244	10.3454	10.2487	10.1873	10.1957	10.1085	10.1945	9.18593	8.99227	9.0433
ENSG00000057019	9.56817	9.37707	9.51076	9.54882	9.5049	9.56229	9.41613	9.51374	9.54513	9.39607	9.45691	9.57129	9.47377	9.60262	9.3698	9.41291	9.45799	9.45985	9.42393	9.49497	9.81525	9.96875	9.83649
ENSG00000057252	8.5855	8.62039	8.74	8.75539	8.70053	8.69725	8.80333	8.91933	8.60797	8.56075	8.69606	8.6898	8.82811	8.83998	8.69449	8.60148	8.6035	8.72275	8.57792	8.65556	8.83451	8.82762	8.74495
ENSG00000057294	10.3297	10.3534	10.3127	10.5238	10.3657	10.3516	10.4297	10.4832	10.3576	10.4324	10.3731	10.4499	10.3519	10.4378	10.2899	10.3226	10.404	10.1919	10.0382	10.2193	9.86187	9.78231	9.73512
ENSG00000057468	3.00157	2.21247	3.1537	3.47608	2.59085	1.65584	2.6832	3.52973	2.63293	2.07686	2.31011	2.41891	2.33342	2.94675	2.44783	2.54965	1.06974	3.67459	2.80535	2.48879	1.98648	2.28335	2.15262
ENSG00000057593	9.0343	9.49077	9.38572	9.24262	9.47465	9.49722	9.5242	9.39443	9.3882	9.51191	9.56832	9.52308	9.52806	9.28559	9.41288	9.53689	9.31595	9.25105	9.3792	9.1946	7.96928	7.7187	7.7367
ENSG00000057608	12.0603	12.0901	12.0605	12.1209	12.2067	12.2093	12.2321	12.1615	12.2015	12.1841	12.1957	12.2388	12.1552	12.1888	12.2566	12.1908	12.2522	12.1791	12.1022	12.137	12.0892	12.1147	12.1771
ENSG00000057663	9.02139	8.75595	8.8401	8.83981	9.0014	8.94719	8.83451	8.92247	8.93683	8.68443	9.03781	8.89806	8.81846	8.93346	8.85928	8.9118	8.83985	8.94142	8.90756	8.92294	9.23464	9.26503	9.3677
ENSG00000057704	4.21116	3.84069	4.40512	3.47608	4.00662	4.74485	3.42774	4.07244	3.63764	3.79447	4.15596	4.36209	5.05832	3.64421	4.39587	4.12984	4.88633	4.61696	4.35532	4.53248	5.10141	5.80547	5.62201
ENSG00000057757	9.20677	9.29875	9.18062	9.28003	9.01827	9.21078	9.12531	9.12957	9.26916	9.2397	9.09638	9.14239	9.19921	9.19647	9.2692	9.29743	9.36246	9.28036	9.2871	9.21266	9.03522	9.0815	9.17644
ENSG00000057935	9.13365	9.07721	9.18498	9.15746	9.35799	9.17633	9.31658	9.06851	9.21966	9.09859	9.28445	9.16987	9.15899	9.26551	9.22692	9.05826	9.16668	9.22646	9.13016	9.18548	8.93836	8.83008	8.73098
ENSG00000058056	7.81557	7.51361	7.85149	7.90523	7.78181	7.84605	7.68636	7.79103	7.79857	7.77	7.66477	7.90762	7.81519	7.68746	7.84151	7.67197	7.57014	7.89393	7.86957	7.88427	7.52314	7.76048	7.32392
ENSG00000058063	9.98717	10.1221	10.1249	10.1887	10.0623	10.046	10.1696	9.96732	10.0303	10.0542	10.0924	10.1286	10.1955	10.229	10.1918	10.0997	10.1613	10.0259	10.0071	10.1283	9.91491	10.0083	9.97039
ENSG00000058085	8.04983	7.70167	7.80695	7.39943	7.47462	7.31383	7.09349	7.52792	7.75059	7.00165	7.49309	7.57902	7.4489	7.60462	7.44941	7.27067	7.64334	7.78748	7.46731	7.68524	10.0611	10.241	9.89406
ENSG00000058091	8.43294	8.08953	8.22179	8.30563	8.09979	8.08193	8.10534	8.09922	8.07396	8.03194	8.09901	8.1642	8.21398	8.15836	8.11514	8.07661	8.2126	8.01374	8.0061	7.98752	7.89491	7.78092	7.91208
ENSG00000058262	12.3083	12.2835	12.3219	12.3304	12.3191	12.2491	12.3287	12.3614	12.4044	12.3239	12.3411	12.3294	12.3716	12.3404	12.3452	12.3331	12.2552	12.3603	12.3449	12.3699	13.163	13.2732	13.2805
ENSG00000058272	9.74747	9.76637	9.62421	9.62482	9.71613	9.65951	9.59268	9.66576	9.69935	9.65989	9.79741	9.76576	9.71478	9.81556	9.68105	9.67867	9.82785	9.716	9.77039	9.80725	9.51286	9.69617	9.72811
ENSG00000058404	3.00157	2.81922	2.42989	3.47608	3.81391	1.65584	2.41636	3.23869	2.36801	3.61661	2.79469	2.91102	3.01257	2.53429	2.94184	1.96826	2.92492	3.06276	3.0854	1.50854	3.07154	1.34893	1.61721
ENSG00000058453	8.48476	8.40644	8.44302	8.3621	8.15419	8.25511	8.21835	8.39915	8.40149	8.37922	8.39622	8.33135	8.4254	8.04134	8.20273	8.43932	8.31707	8.53576	8.59174	8.36622	7.97443	7.79607	7.83169
ENSG00000058600	9.37357	9.36122	9.42678	9.49777	9.37774	9.3903	9.23584	9.42575	9.35878	9.36471	9.36245	9.41468	9.34972	9.2878	9.40104	9.54254	9.47368	9.49704	9.50198	9.46327	9.55467	9.58722	9.62861
ENSG00000058668	10.6845	10.6582	10.6976	10.7383	10.7785	10.7668	10.7735	10.677	10.6739	10.7112	10.6612	10.6957	10.6428	10.6872	10.6027	10.5302	10.576	10.5494	10.5371	10.5465	10.8697	10.9753	10.8346
ENSG00000058673	11.104	10.8829	10.9762	11.0452	11.0895	10.963	10.9449	10.8195	10.9488	10.9404	11.008	11.0024	10.9409	10.8968	10.9492	11.0952	11.0792	10.9374	10.8532	11.0098	10.6494	10.7092	10.8828
ENSG00000058729	8.60727	8.61594	8.51273	8.66571	8.58824	8.70842	8.47431	8.60441	8.56501	8.6731	8.63271	8.65131	8.66537	8.65337	8.5941	8.57968	8.68666	8.56357	8.65766	8.67197	8.61771	8.57599	8.66146
ENSG00000058799	8.98859	9.06093	9.03373	9.20421	9.26679	9.18702	9.17217	9.11317	9.10983	9.25118	9.19225	9.09156	9.16408	9.06837	9.18611	9.3041	9.30596	9.21222	9.08513	9.00295	8.7352	8.73898	8.81507
ENSG00000058804	7.95793	7.71837	7.88402	7.6997	8.05688	7.93116	7.9621	8.01935	8.11244	8.03194	7.83077	8.07397	8.08577	8.25659	7.96885	7.96331	7.87712	8.1129	8.05159	8.09852	8.45062	8.43799	8.51964
ENSG00000058866	3.66462	4.16687	4.67671	3.65243	4.25462	3.55525	3.56627	3.23869	3.75348	3.79447	3.57141	4.36209	3.82069	4.52654	3.84477	3.76795	4.45167	4.85558	4.40716	4.21176	6.09595	6.06085	6.03982
ENSG00000059122	9.31657	9.27638	9.30594	9.22179	9.12858	8.99054	9.1309	9.21911	9.31231	9.02473	9.22603	9.16442	9.27172	9.19175	9.2053	9.31073	9.19672	9.53473	9.53002	9.52238	9.86537	9.84193	9.9312
ENSG00000059145	8.5634	8.42573	8.55711	8.5198	8.38642	8.31903	8.3599	8.49899	8.62328	8.47852	8.56645	8.46862	8.66537	8.56849	8.72139	8.75851	8.75798	8.99023	9.34473	8.92568	8.53945	8.43799	8.45026
ENSG00000059377	4.01664	4.16687	3.91105	4.08022	4.91371	4.26934	4.50405	4.82924	4.37648	4.74153	4.15596	4.50706	4.10098	4.26402	4.79367	4.65962	3.9343	4.10287	4.40716	2.89884	2.79189	3.65584	4.07495
ENSG00000059378	8.55446	8.71494	8.69182	8.34467	8.42489	8.48846	8.37883	8.59263	8.39705	8.55459	8.58517	8.37725	8.41946	8.55016	8.36955	8.34996	8.52389	8.33947	8.40387	8.25485	8.51921	8.50095	8.38929
ENSG00000059573	10.7139	10.732	10.6558	10.7024	10.8256	10.7434	10.8321	10.746	10.7586	10.6344	10.7459	10.7703	10.7406	10.7947	10.716	10.6397	10.7333	10.5712	10.6017	10.7128	10.6319	10.698	10.7331
ENSG00000059588	8.82357	8.94868	8.90757	9.03149	9.01827	9.11048	9.2793	8.98387	8.88061	8.98404	9.11195	9.15894	8.88777	8.74647	9.05024	8.99926	9.04288	9.06742	9.3162	9.24592	8.71754	8.63613	8.88194
ENSG00000059691	8.11206	8.33121	8.10707	7.89649	8.02384	8.33354	8.35035	8.23169	8.11786	8.10122	8.39465	8.15872	8.23348	8.20597	8.26894	7.98005	8.23908	8.35252	7.98066	8.1082	8.10742	8.12671	7.99627
ENSG00000059728	8.7897	8.61148	8.7131	8.41974	8.6509	8.57645	8.58846	8.74584	8.63465	8.88438	8.78291	8.72357	8.56121	8.55752	8.53466	8.53506	8.62374	8.44981	8.39106	8.71061	9.26795	9.40166	9.39602
ENSG00000059758	8.47144	8.28152	8.44531	8.2381	8.21161	8.13809	8.05328	8.39883	8.26663	8.30584	8.27528	8.17509	8.43638	8.30549	8.17197	8.28408	8.17469	8.21286	8.14995	8.23289	8.5819	8.4508	8.69063
ENSG00000059769	8.10185	8.08046	8.05408	8.22323	8.28409	8.26311	8.28207	8.34729	8.4014	8.43658	8.40003	8.38572	8.30248	8.24788	8.5075	8.37364	8.30794	8.36577	8.43853	8.27793	8.87775	8.89882	9.00772
ENSG00000059804	5.19026	5.42073	5.10236	5.40773	5.50707	5.3059	5.87204	5.65118	5.34466	5.67258	5.65652	5.92399	5.28152	5.57454	5.60785	5.49014	5.25437	5.30189	5.42423	5.18223	3.68378	3.8213	3.85276
ENSG00000059915	4.85972	4.34944	4.86228	4.30805	4.91371	4.68579	4.43339	4.82924	5.05561	4.82581	5.11492	4.36209	4.96809	5.18855	4.31743	4.76641	4.03446	4.57305	4.95193	4.88757	4.75079	4.23214	4.13278
ENSG00000060069	9.28179	9.26506	9.32384	9.13164	9.13117	8.95971	9.04761	9.14039	8.94904	9.12794	9.10418	9.17802	9.11499	9.0812	9.0832	9.15972	9.08437	9.13504	9.10095	8.97148	9.3472	9.44554	9.33265
ENSG00000060138	10.9078	10.7904	10.8453	10.7149	10.6839	10.6786	10.685	10.7653	10.7621	10.6241	10.6173	10.721	10.6929	10.6788	10.7886	10.8077	10.7845	10.9644	10.8188	10.8916	11.3207	11.3272	11.2831
ENSG00000060237	12.7153	12.7714	12.7184	12.8634	12.8168	12.878	12.784	12.8732	12.7868	12.8729	12.7855	12.8841	12.8949	12.8723	12.8413	12.8112	12.8238	12.8609	12.7765	12.8298	12.5812	12.6811	12.6232
ENSG00000060339	10.0361	10.1252	10.1881	10.2258	10.2526	10.2407	10.1871	10.1283	10.202	10.1595	10.1003	10.2673	10.3374	10.2598	10.268	10.2126	10.2654	10.2551	10.337	10.4074	10.169	10.0976	10.21
ENSG00000060491	10.3712	10.4491	10.3931	10.3413	10.2982	10.3108	10.335	10.2432	10.2789	10.3441	10.4821	10.4079	10.3441	10.2198	10.3243	10.4067	10.2315	10.4376	10.3634	10.2643	10.3729	10.2666	10.2644
ENSG00000060566	10.1263	10.0807	10.0067	10.2328	10.3143	10.2573	10.1911	10.2294	10.0446	10.3189	10.1248	10.2443	10.2951	10.214	10.4212	10.3901	10.2884	10.436	10.5298	10.424	9.13172	8.83742	8.98366
ENSG00000060642	7.8956	8.0104	7.91583	8.14531	8.10507	8.21321	7.90449	7.96557	7.95195	8.04078	8.06742	7.8679	7.98008	8.01067	8.00684	7.82189	8.04861	7.96361	7.85098	7.81503	7.52314	7.39318	7.68449
ENSG00000060656	10.6763	10.7463	10.7045	10.8051	10.8431	10.8674	10.9033	10.7931	10.7844	10.8115	10.8906	10.8867	10.8112	10.7568	10.8236	10.8577	10.7746	10.7944	10.7652	10.7136	10.4506	10.4413	10.2964
ENSG00000060688	8.53642	8.29271	8.29619	8.32528	8.43749	8.12703	8.55972	8.32007	8.31928	8.5107	8.41989	8.37725	8.40663	8.2879	8.41734	8.47334	8.41197	8.48874	8.41973	8.43871	8.25813	8.22697	8.31004
ENSG00000060749	9.95357	9.79025	9.76184	10.0019	9.85724	9.98147	9.98117	9.82525	9.93075	9.94306	9.76331	9.99817	9.88471	9.92915	9.93364	9.84021	9.91419	9.93019	9.89588	9.9419	9.95853	10.0822	9.98223
ENSG00000060762	9.20677	9.32079	9.30194	9.23224	9.3469	9.35992	9.33608	9.41465	9.31937	9.26634	9.37325	9.25446	9.24795	9.3985	9.3279	9.29966	9.37206	9.28036	9.17384	9.2149	9.67196	9.83339	10.0182
ENSG00000060971	12.0558	12.2487	12.152	12.3162	12.4365	12.4568	12.5091	12.3766	12.3097	12.3834	12.4292	12.34	12.2773	12.1993	12.2788	12.2432	12.1864	12.0923	12.0915	12.0997	11.0296	10.8718	10.9213
ENSG00000060982	10.8974	11.0597	11.0171	11.0254	11.1631	11.203	11.1304	11.0306	11.021	11.1477	11.0786	11.211	11.159	11.1672	11.3262	11.2464	11.2016	11.3282	11.2914	11.2572	11.5092	11.7049	11.7005
ENSG00000061273	10.7328	10.6188	10.6637	10.5169	10.2165	10.2122	10.2591	10.3694	10.4951	10.395	10.4457	10.4832	10.3631	10.3695	10.3129	10.416	10.3358	10.5063	10.5341	10.4995	10.9224	10.9176	10.8759
ENSG00000061337	2.17132	3.71322	3.91105	3.27513	3.46585	3.09234	3.27447	2.64953	3.37366	2.89487	3.15679	4.28374	2.81967	3.52913	1.69063	3.28375	3.44513	3.06276	3.20736	3.47881	3.07154	3.74177	2.84868
ENSG00000061455	4.60659	4.43273	4.62633	4.30805	4.25462	3.79768	4.3591	3.65583	5.10006	3.61661	4.84371	4.57442	4.65764	4.03011	4.23448	4.714	4.65416	3.90457	3.8558	4.13808	3.30569	4.23214	4.07495
ENSG00000061656	3.90857	4.26104	4.14375	4.97191	4.39904	4.18655	4.75645	3.65583	3.51168	4.55657	4.62966	4.70039	4.18349	3.64421	4.31743	4.2816	4.29895	4.33091	3.9978	4.13808	4.39219	4.04197	4.52711
ENSG00000061676	11.4932	11.4598	11.5351	11.5557	11.5981	11.5583	11.5428	11.5008	11.6033	11.5302	11.468	11.6126	11.5574	11.6052	11.5587	11.5982	11.6135	11.6093	11.5561	11.6041	11.8018	11.8762	11.8367
ENSG00000061794	10.0345	10.0431	9.92313	10.0241	10.1657	10.2213	10.1043	10.0093	10.0601	10.0716	10.1812	10.1549	10.1189	10.1127	10.219	10.1124	10.2009	10.1507	10.1046	10.1751	10.2111	10.2584	10.1726
ENSG00000061936	9.37103	9.4712	9.38761	9.54324	9.39722	9.30946	9.40694	9.41018	9.54915	9.50234	9.46703	9.48201	9.34972	9.34634	9.40815	9.40052	9.37922	9.42323	9.53148	9.41729	9.25227	9.32543	9.26799
ENSG00000061938	9.46464	9.37707	9.48448	9.35526	9.18197	9.2134	9.36247	9.22675	9.2471	9.36118	9.34937	9.31234	9.4002	9.13876	9.24822	9.38803	9.28324	9.30069	9.34805	9.42699	9.3956	9.232	9.19861
ENSG00000061987	10.0167	10.0839	9.87539	10.0734	10.1907	10.1204	10.2071	10.1615	10.1085	9.98948	10.0753	10.1031	10.0381	10.1399	10.1199	9.99098	10.0757	10.0208	10.0352	10.1342	10.1409	10.3468	10.389
ENSG00000062038	3.66462	3.84069	3.2894	3.65243	3.00618	3.90516	3.27447	3.97901	3.63764	3.17748	3.8931	3.43059	4.01346	1.95448	2.11834	3.13223	4.21606	3.83191	4.18761	2.48879	3.4099	2.68152	2.36053
ENSG00000062194	10.3168	10.176	10.2086	10.3284	10.3402	10.4337	10.3637	10.2532	10.2861	10.3171	10.2332	10.2635	10.2238	10.2093	10.29	10.3315	10.3865	10.2979	10.4213	10.4006	10.6095	10.7553	10.7208
ENSG00000062282	10.0647	10.3535	10.2414	10.4735	10.7196	10.7924	10.8339	10.4335	10.3882	10.5408	10.7063	10.3538	10.398	10.3861	10.2364	10.3041	10.2009	9.78017	9.76543	9.72785	8.58469	8.53445	8.4812
ENSG00000062370	6.85145	6.90368	6.80208	6.65578	7.06229	6.92434	7.0587	6.70574	7.07931	7.07236	6.83083	6.76295	6.76911	6.56897	6.8408	6.58731	7.22277	6.61611	6.3286	6.83897	6.50178	6.12622	6.43078
ENSG00000062485	10.9553	10.9589	11.0093	10.927	10.9401	10.951	10.9071	10.8577	10.9877	11.0031	10.9612	11.0627	10.9186	10.9485	10.9286	10.9324	10.8901	10.8627	10.9184	10.9426	10.6879	10.5757	10.5795
ENSG00000062524	3.198	2.54751	3.0039	3.47608	2.32758	3.55525	2.41636	2.05824	3.22103	3.17748	2.79469	3.81178	3.7137	3.40407	3.13716	3.42086	3.11992	3.18448	3.77919	2.70834	5.94802	6.36159	5.94616
ENSG00000062582	9.36081	9.51949	9.43434	9.38372	9.43959	9.39261	9.55142	9.51455	9.42361	9.47316	9.55317	9.29497	9.4085	9.19883	9.41787	9.38118	9.28832	9.41889	9.32104	9.20097	9.19517	9.04182	9.18685
ENSG00000062598	9.07861	9.13742	9.08593	9.18282	9.23827	9.15743	8.83108	9.12139	9.09344	9.11543	9.14763	9.18072	9.24795	9.16067	9.12122	9.03708	9.19672	9.10452	9.32802	9.18548	9.05344	9.07324	9.05082
ENSG00000062650	10.1811	10.1095	10.0705	10.1852	10.144	10.0621	10.1366	10.1738	10.0838	10.1676	10.1626	10.1314	10.214	10.2302	10.1724	10.2337	10.1928	10.1413	10.0788	10.2447	10.389	10.4683	10.4514
ENSG00000062716	11.4182	11.4054	11.3655	11.323	11.2982	11.3887	11.3032	11.3035	11.2753	11.2542	11.3133	11.4517	11.4158	11.2982	11.5171	11.4703	11.4262	11.3124	11.3969	11.3787	11.5772	11.5891	11.6721
ENSG00000062725	9.41859	9.49804	9.38383	9.55716	9.42701	9.42457	9.38838	9.29133	9.55315	9.32544	9.34279	9.48857	9.44479	9.48981	9.53055	9.31073	9.51761	9.41081	9.32634	9.48572	9.42076	9.4066	9.42813
ENSG00000062822	7.91668	7.71837	7.82939	7.81542	7.3108	7.72659	7.67109	7.84498	7.96403	7.69142	7.59262	7.73436	7.59924	7.5975	7.5895	7.84034	7.59496	7.80657	7.80824	7.76083	8.21921	8.04877	8.05354
ENSG00000063046	12.1549	12.1871	12.2196	12.1629	12.2375	12.2298	12.1669	12.1771	12.1604	12.1789	12.2041	12.2081	12.2189	12.2488	12.2768	12.1966	12.1962	12.2141	12.2208	12.1522	12.2608	12.3633	12.3259
ENSG00000063127	5.64562	5.39894	5.74584	5.87952	5.13614	5.85807	5.78732	4.98152	4.81017	5.18618	5.44498	5.54382	5.59902	5.22598	5.10516	5.28052	5.49064	5.49615	5.67718	5.88569	5.30433	4.64282	4.83646
ENSG00000063169	8.9276	8.81147	8.71611	8.88024	8.62909	8.68222	8.70552	8.78777	8.52074	8.69006	8.77966	8.57935	8.81846	8.55752	8.68671	8.79996	8.63575	8.8729	8.96921	8.93115	8.82276	8.85198	8.67125
ENSG00000063176	10.0345	10.0298	10.0717	10.0281	9.94516	10.0028	10.1254	9.9989	10.0159	10.1757	10.1055	10.0104	10.2116	10.0199	10.0275	10.0635	9.9941	10.1404	10.2385	10.1922	9.77313	9.48812	9.58007
ENSG00000063177	11.7094	11.7811	11.8164	11.7051	11.6957	11.6212	11.7482	11.7411	11.6702	11.6383	11.7418	11.608	11.7013	11.6588	11.7141	11.758	11.6647	11.8168	11.7264	11.6383	12.181	12.1201	12.1212
ENSG00000063180	2.77413	2.21247	2.17339	3.80955	2.81341	1.05348	3.27447	2.64953	2.36801	2.89487	1.57512	2.41891	2.59694	2.53429	2.11834	2.28804	2.10338	3.18448	2.45752	3.47881	1.98648	2.03367	3.21276
ENSG00000063241	9.43816	9.55956	9.59176	9.58188	9.59389	9.6324	9.6287	9.6751	9.58673	9.57415	9.58886	9.54214	9.48601	9.39028	9.35023	9.4211	9.39344	9.32075	9.23964	9.12001	9.19872	9.27947	9.20536
ENSG00000063244	10.8489	10.8003	10.802	10.7589	10.6245	10.6956	10.6707	10.805	10.7699	10.8956	10.725	10.7312	10.8177	10.6421	10.7045	10.6829	10.6548	10.8431	10.8624	10.7825	10.9481	10.8581	10.8781
ENSG00000063245	11.179	11.2654	11.225	11.2112	11.0952	11.2168	11.1717	11.1908	11.1743	11.2972	11.3411	11.1195	11.2823	11.1356	11.0768	11.1455	11.0838	11.2918	11.1998	11.1139	11.4436	11.3843	11.357
ENSG00000063322	9.47178	9.46626	9.46132	9.42979	9.5731	9.48861	9.55573	9.51998	9.42579	9.32905	9.43851	9.50809	9.49007	9.48596	9.3254	9.46933	9.36246	9.50437	9.3792	9.42312	9.78529	9.85886	9.80793
ENSG00000063587	8.4475	8.4104	8.47764	8.50264	8.52274	8.59663	8.5304	8.51155	8.41475	8.56689	8.57397	8.65521	8.50216	8.48989	8.504	8.53883	8.43506	8.33291	8.39748	8.45397	8.19754	8.29251	8.60128
ENSG00000063601	9.19819	9.16812	9.27153	9.12043	9.0998	9.17365	9.28933	9.22929	9.23469	9.09009	9.12735	9.21543	9.20416	9.22217	9.16107	9.14742	9.25756	9.24232	9.14168	9.28699	9.36675	9.48812	9.3752
ENSG00000063660	9.89459	10.0214	9.91659	9.63273	9.61992	9.57252	9.6811	9.72989	9.70296	9.77302	9.91301	9.61594	9.77423	9.67037	9.72349	9.79204	9.66942	10.0799	9.83095	9.79681	10.688	10.5921	10.5336
ENSG00000063761	6.89458	7.10755	7.21388	7.05159	7.11553	7.08153	7.1049	7.20589	7.06816	6.96494	7.14519	7.28937	7.04767	6.96183	7.15458	7.09738	7.14648	6.8821	7.19243	7.17919	7.06954	7.13186	6.98239
ENSG00000063854	9.39376	9.37707	9.33956	9.35207	9.39722	9.47559	9.35053	9.34146	9.45817	9.35765	9.50683	9.3368	9.4364	9.32062	9.35515	9.2682	9.21016	9.16678	9.13593	9.1717	8.99181	9.05866	9.0713
ENSG00000063978	9.76453	9.69646	9.7778	9.5846	9.60137	9.5143	9.5369	9.63737	9.60996	9.53087	9.74179	9.6766	9.59177	9.79547	9.62516	9.67696	9.67912	9.70078	9.70976	9.8235	10.0205	10.0454	10.0965
ENSG00000064012	8.64985	8.60701	8.73704	8.75539	8.6545	8.66703	8.56799	8.76346	8.67194	8.67877	8.65768	8.70866	8.68321	8.74969	8.71376	8.68213	8.83985	8.97976	8.7782	8.92294	9.05746	9.06284	8.89244
ENSG00000064042	4.91662	5.35691	4.81808	4.90382	4.25462	4.74485	4.19793	4.53315	4.75565	4.74153	4.62966	4.81624	4.26153	5.39983	4.9578	4.48295	5.5595	5.2395	5.0201	4.69547	6.96223	6.88039	7.02882
ENSG00000064102	7.64083	7.83778	7.63924	7.76833	7.59948	7.71187	7.817	7.72782	7.88367	7.75933	7.67877	8.01458	7.82807	7.78474	7.76969	7.93497	7.81511	7.78748	7.83687	7.80911	7.74856	7.81105	7.71793
ENSG00000064115	10.46	10.4315	10.3894	10.4939	10.6135	10.5291	10.5537	10.4412	10.4773	10.6064	10.4851	10.506	10.4921	10.4547	10.5745	10.4221	10.3994	10.4058	10.3943	10.5078	10.1342	10.1098	10.0644
ENSG00000064199	5.02411	3.71322	4.90517	5.27117	4.25462	4.90879	3.9164	4.32111	3.8607	4.55657	4.44532	5.28696	4.33557	3.75078	5.05769	4.65962	4.98975	4.57305	4.76593	4.34872	5.19189	4.34627	4.96937
ENSG00000064225	6.22094	6.38174	6.42857	6.01479	5.96114	5.65749	5.78732	6.41606	6.01066	6.10007	5.74038	6.00093	6.53776	6.26169	6.01116	6.20601	6.11148	6.13224	6.25978	6.42425	7.00445	7.06675	7.25398
ENSG00000064270	4.46115	4.16687	4.28035	3.47608	3.32828	3.09234	4.01647	3.65583	4.44701	4.34436	4.44532	4.01942	4.26153	4.26402	4.47026	4.48295	3.82667	4.7412	5.20717	5.05708	7.43326	7.6257	7.68449
ENSG00000064309	7.97142	7.87548	7.846	7.94812	7.86501	7.70445	7.70898	7.89699	7.8709	7.82223	8.04597	8.05051	7.76248	8.07875	7.92324	7.95769	8.03053	7.98051	7.96777	8.13212	7.86772	7.90717	7.8871
ENSG00000064313	9.00508	9.05437	9.08593	9.11291	8.99857	9.02371	8.87506	9.02536	9.14738	8.9039	8.87094	9.02087	9.10444	9.06063	8.92026	8.93774	9.17493	8.94788	9.04683	8.97941	8.92303	9.14793	9.09695
ENSG00000064393	11.4499	11.3482	11.422	11.5341	11.3999	11.4253	11.4328	11.4131	11.3725	11.3639	11.3055	11.3752	11.4013	11.4869	11.292	11.2817	11.2879	11.2675	11.249	11.3038	11.376	11.4662	11.4149
ENSG00000064419	9.98882	9.78035	9.80069	9.81293	9.7502	9.79668	9.82605	9.662	9.85335	9.82002	9.68394	9.90147	9.85354	9.88887	9.88177	9.79677	9.86403	9.93454	9.79492	9.9035	10.2192	10.2774	10.2628
ENSG00000064490	7.61527	7.75928	7.76682	7.78735	7.84623	7.57209	7.86477	7.84498	7.67179	7.5019	7.83703	7.61146	7.76248	7.80343	7.82034	7.85252	7.90385	7.92919	7.95477	7.91768	7.89939	8.01466	8.0347
ENSG00000064545	8.98194	9.08366	9.03132	8.88466	8.96415	8.98136	8.99645	8.89715	9.02593	9.14444	9.15015	8.95919	8.93319	8.90777	8.79922	9.12752	8.87405	9.16678	9.10488	8.9635	8.69451	8.43153	8.62414
ENSG00000064547	8.4475	8.57985	8.61316	8.63978	8.58447	8.26961	8.3599	8.40334	8.31457	8.42548	8.27066	8.52929	8.49005	8.30549	8.4636	8.67187	8.73584	8.81753	8.76833	8.77279	8.57631	8.53746	8.4011
ENSG00000064601	12.8937	12.9876	12.909	13.0098	13.0108	13.0821	13.0557	13.0217	12.977	13.031	13.0806	12.9751	12.9744	12.925	12.8841	12.9498	12.8978	12.8686	12.8789	12.8689	12.8192	12.714	12.7399
ENSG00000064607	10.6978	10.733	10.6831	10.7383	10.6927	10.5948	10.5826	10.6469	10.6684	10.7167	10.6146	10.7117	10.6309	10.6114	10.6545	10.7091	10.7164	10.7593	10.9874	10.9713	10.4643	10.4581	10.4074
ENSG00000064651	9.807	9.32624	9.69314	9.46565	9.1389	9.00571	8.93384	9.41465	9.44746	9.21256	9.16763	9.26724	9.31583	9.55745	9.19437	9.21733	9.35279	9.19602	9.14931	9.29124	8.90753	9.04182	8.86071
ENSG00000064652	8.00461	8.15232	8.30422	8.09276	8.20671	8.09334	8.33589	8.14295	8.34259	8.23053	8.10421	8.08557	8.14359	8.04773	8.25848	8.22912	8.13575	7.94219	8.23488	8.07403	8.54232	8.58183	8.62666
ENSG00000064666	11.9071	11.7716	11.8556	11.5961	11.5039	11.5423	11.5035	11.6891	11.5941	11.5286	11.5814	11.606	11.604	11.6601	11.6043	11.6554	11.6336	11.7829	11.5778	11.5716	12.2449	12.1701	12.1992
ENSG00000064687	8.83837	8.83845	8.86204	8.83067	8.7884	8.74505	8.76428	8.89075	8.5886	8.77732	8.77641	8.65909	8.62903	8.72048	8.33513	8.54259	8.51525	8.54664	8.61697	8.51346	8.21202	8.33806	8.12296
ENSG00000064692	6.96372	6.7002	6.94253	6.95395	6.53054	6.31314	6.40106	6.66132	6.99943	6.80802	6.49317	6.81957	6.74214	6.92816	6.79811	6.67217	6.98062	6.46814	6.39429	6.37699	6.64746	6.6553	6.7527
ENSG00000064703	8.5855	8.51921	8.5231	8.54796	8.48277	8.48846	8.37412	8.4123	8.52074	8.57908	8.44058	8.48622	8.56121	8.56119	8.65915	8.65111	8.64766	8.51508	8.51435	8.60518	8.48979	8.4283	8.39816
ENSG00000064726	9.81451	9.74208	9.65752	9.82449	9.77524	9.87478	9.88681	9.80327	9.86627	9.83789	9.72163	10.018	9.81686	9.90915	9.73296	9.77455	9.84863	9.85427	9.81064	9.80725	10.0226	10.0094	10.1752
ENSG00000064787	8.27326	8.30381	8.05088	8.05401	8.17194	8.24425	8.09393	8.22153	8.247	8.26113	8.10421	8.36304	8.30433	8.55385	8.31508	8.33703	8.20724	8.36866	8.30145	8.33947	8.39774	8.09441	8.19598
ENSG00000064932	9.71375	9.60291	9.68854	9.61686	9.46238	9.55199	9.41842	9.54668	9.60226	9.61322	9.62909	9.41468	9.57849	9.46459	9.48642	9.535	9.42607	9.63956	9.55895	9.24811	10.0092	9.89447	9.82995
ENSG00000064933	7.57165	7.71004	7.80695	7.47176	7.77521	7.85948	7.85804	7.73498	7.76446	7.71581	7.97396	7.78501	7.55344	7.43118	7.87613	7.85857	7.57014	7.85321	8.0061	8.12737	7.87228	7.87425	7.9038
ENSG00000064961	9.80512	9.92761	9.80919	9.76575	9.71613	9.75419	9.72058	9.78441	9.78011	9.73538	9.9668	9.66698	9.81038	9.62905	9.76472	9.76331	9.60165	9.70333	9.58309	9.72942	9.34062	9.21895	9.34952
ENSG00000064995	8.53188	8.33121	8.55711	8.51411	8.66525	8.57238	8.76787	8.6161	8.71544	8.45885	8.49701	8.61178	8.60678	8.59377	8.74406	8.6194	8.59942	8.648	8.69463	8.55298	8.73269	8.48547	8.80843
ENSG00000064999	9.00508	9.11237	9.16967	8.99104	8.99857	9.07352	9.02976	9.09936	9.06008	9.1769	9.08327	9.01482	9.10179	9.0812	9.05327	9.08945	9.03987	9.0575	9.10095	9.02867	9.05344	9.0815	9.04707
ENSG00000065000	11.7004	11.6718	11.6741	11.7409	11.641	11.6505	11.6964	11.6527	11.7333	11.6477	11.7534	11.7028	11.7376	11.6618	11.6982	11.6675	11.5895	11.8273	11.6981	11.7391	12.2126	12.2596	12.2217
ENSG00000065029	9.30062	9.4712	9.27562	9.3899	9.36899	9.32889	9.39537	9.41465	9.3473	9.4601	9.47909	9.32462	9.42373	9.21753	9.30775	9.42925	9.30596	9.35031	9.39854	9.55283	9.16933	9.20578	9.03953
ENSG00000065054	9.14263	9.35055	9.20228	9.24606	9.28084	9.24954	9.45008	9.36934	9.45817	9.31089	9.4115	9.30987	9.32267	9.16309	9.19711	9.22671	9.21817	9.07924	9.04069	8.87839	8.41036	8.45399	8.23941
ENSG00000065057	7.16502	7.56066	7.23924	7.39943	7.4079	7.42635	7.44732	7.44301	7.30493	7.40932	7.41993	7.18547	7.38059	7.44712	7.37391	7.37562	7.27489	7.47198	7.38569	7.26822	6.71003	6.4913	6.64752
ENSG00000065060	10.2408	10.0281	10.2021	10.0983	10.1745	10.1804	10.0799	10.1405	10.1003	10.1656	10.0767	10.1876	10.2311	10.2855	10.2615	10.1983	10.2368	10.3196	10.3789	10.3392	10.2048	10.3364	10.2837
ENSG00000065135	10.7939	10.8139	10.7463	10.6936	10.7644	10.827	10.785	10.7119	10.7988	10.8623	10.7625	10.8884	10.7932	10.8727	10.7904	10.699	10.8564	10.8541	10.7383	10.8704	11.0188	11.0556	11.1256
ENSG00000065150	10.8805	10.8159	10.8426	10.8352	10.872	10.8699	10.8636	10.8739	10.8362	10.7373	10.7805	10.9594	10.8305	10.9834	10.9013	10.8455	10.9524	10.9755	10.8872	10.8831	10.8537	10.843	10.9089
ENSG00000065154	8.36812	8.17668	8.23025	8.18171	8.6509	8.54771	8.58031	8.53636	8.63842	8.34921	8.36896	8.45974	8.31352	8.57938	8.43138	8.34996	8.48016	8.17664	8.28422	8.18339	9.39718	9.36827	9.51903
ENSG00000065183	8.95502	8.83079	8.889	8.85341	8.8047	8.93772	8.78571	8.96877	8.74373	8.93744	8.86789	8.95919	8.8345	8.99709	8.92026	8.9576	8.94654	9.0334	9.04887	8.97148	9.03319	9.02263	9.04707
ENSG00000065243	10.0425	9.9419	9.98441	10.0983	10.0623	10.0621	9.92915	10.0152	10.0042	10.0211	9.98382	9.99664	10.003	10.0567	10.0744	9.97018	10.0096	9.91818	9.94712	10.0576	10.005	10.1308	10.1778
ENSG00000065268	8.92413	9.02783	9.0929	9.01545	8.91993	8.7983	8.85155	8.93807	9.10711	8.96092	9.07535	8.89147	9.05325	8.9391	8.92026	8.99102	8.97833	9.17598	9.00118	8.90362	9.29882	9.16941	9.19861
ENSG00000065308	10.5561	10.6109	10.5925	10.6592	10.6236	10.7712	10.8227	10.5839	10.6004	10.6676	10.67	10.6339	10.6143	10.6017	10.5692	10.575	10.497	10.4573	10.4276	10.4594	10.3842	10.4397	10.33
ENSG00000065320	5.94819	6.40255	6.45768	6.19654	5.91383	6.14791	5.8699	6.14211	6.36044	6.16622	6.00781	6.18461	6.4065	6.2796	6.61348	6.33308	6.06487	6.65875	6.34198	6.55741	7.61866	7.73974	7.57922
ENSG00000065325	5.61156	5.51815	5.67325	5.51888	5.49876	4.95954	4.9712	5.39719	5.48233	4.74153	5.19507	5.47498	5.33593	5.64062	5.05769	5.24403	5.30257	4.89177	4.35532	4.69547	4.66915	4.45204	5.11994
ENSG00000065328	3.90857	3.9578	3.63345	3.65243	2.59085	2.0795	2.9083	3.23869	3.8607	4.22527	3.15679	3.43059	3.47249	3.11581	3.72834	2.77102	2.92492	3.18448	3.31982	2.89884	2.23369	3.127	2.54223
ENSG00000065357	6.26544	6.3392	6.20652	6.22472	5.93768	5.83106	5.43621	5.93383	6.10091	6.10007	5.89235	6.02521	5.65793	5.93995	5.9344	5.76564	5.8342	5.88533	5.8369	5.99407	6.48994	6.4913	6.16982
ENSG00000065361	11.1841	11.33	11.2186	11.4061	11.4567	11.5128	11.5153	11.3333	11.3933	11.4235	11.5004	11.428	11.4264	11.2587	11.272	11.3162	11.2936	11.2286	11.3493	11.3565	10.6776	10.5913	10.5641
ENSG00000065413	6.00177	5.73057	6.06238	5.94874	6.00695	5.68791	5.99784	5.83064	5.93906	5.88118	5.79283	5.92554	6.14344	5.82268	5.9344	5.31612	5.41833	5.65201	5.63433	6.09488	6.67909	6.981	6.73414
ENSG00000065427	10.5882	10.6808	10.6185	10.4924	10.659	10.5787	10.6386	10.6094	10.6167	10.6647	10.5962	10.6795	10.6947	10.7006	10.5986	10.7049	10.6637	10.7629	10.6449	10.6944	10.918	10.8996	10.9187
ENSG00000065457	7.44197	7.10755	7.34428	7.28363	7.49084	7.55569	7.52583	7.25653	7.10134	7.47605	7.46911	7.17466	7.363	7.3572	7.57272	7.42537	7.43922	7.47198	7.38569	7.43903	7.71843	7.82589	7.63532
ENSG00000065485	10.3674	10.4466	10.395	10.4528	10.5452	10.5624	10.5775	10.6016	10.527	10.5125	10.492	10.3001	10.4438	10.3043	10.2203	10.1972	10.1751	9.90827	9.91615	9.83957	9.52161	9.46462	9.53386
ENSG00000065491	7.83784	7.83012	7.74337	7.88771	7.93184	7.74841	7.70898	7.77722	7.7782	7.9498	7.93364	7.77072	8.11234	7.69416	7.85546	7.70591	7.61935	7.81602	8.04752	7.7423	7.94347	7.95743	7.79607
ENSG00000065518	10.1324	10.023	10.0384	10.1653	10.0391	10.0519	10.0522	10.116	10.1246	10.093	10.1285	10.0479	10.079	9.98328	10.0534	10.097	10.0001	10.0561	10.0858	9.89793	10.0369	9.87789	9.9493
ENSG00000065526	10.4672	10.2794	10.3941	10.3039	10.1857	10.2836	10.2058	10.3179	10.2434	10.2133	10.2068	10.3149	10.3101	10.3249	10.2563	10.2682	10.2564	10.1993	10.3006	10.3525	10.3087	10.3923	10.3253
ENSG00000065534	10.9176	11.1222	10.9295	11.1482	11.2407	11.3218	11.3087	11.1599	11.1422	11.1425	11.2122	11.193	11.2189	11.0676	11.0368	11.1022	11.0736	11.0222	11.0478	10.9526	10.1662	10.0709	10.0114
ENSG00000065548	9.64385	9.70696	9.68701	9.64059	9.75188	9.73611	9.6128	9.77054	9.71908	9.78886	9.74844	9.72743	9.76588	9.63254	9.79398	9.80619	9.97847	9.82999	9.81064	9.89234	10.0691	10.1006	10.1351
ENSG00000065559	10.002	9.85582	9.94385	9.94161	9.8851	9.78617	9.79644	9.88763	10.0274	9.89751	9.85714	9.90802	9.92273	9.89469	9.80839	9.79519	10.0111	9.85425	9.81664	9.90211	9.77311	9.93836	9.86555
ENSG00000065600	6.54352	6.44329	6.13625	5.69037	6.31075	5.83106	6.49078	6.1635	6.39653	6.2601	6.13517	6.24788	6.1639	6.69444	5.9344	6.43374	6.56101	6.41938	6.46936	6.37699	6.95363	6.85169	6.9586
ENSG00000065613	10.3416	10.1699	10.2714	10.4227	10.338	10.2923	10.3955	10.2432	10.3657	10.1995	10.1788	10.3775	10.3937	10.5546	10.4212	10.3509	10.3924	10.5273	10.3692	10.466	11.1412	11.3268	11.2839
ENSG00000065615	7.38261	7.14508	7.16177	7.11319	7.04043	7.04675	7.3925	7.08778	7.30493	7.20417	7.04061	7.09661	7.14354	7.25226	7.26318	6.8527	7.23335	7.41715	7.20713	7.37632	7.7926	7.75015	7.74136
ENSG00000065618	3.00157	3.24503	3.63345	3.27513	2.32758	3.79768	3.80886	2.38397	4.05385	3.17748	3.57141	2.41891	3.18269	3.75078	3.13716	3.42086	3.71035	3.29673	2.64189	2.48879	5.5059	4.64282	4.90445
ENSG00000065621	4.5357	4.65714	4.98731	4.67783	4.32864	4.85619	4.81321	5.20428	4.37648	4.90545	4.50942	4.97424	4.47314	4.52654	5.05769	5.20658	4.7158	4.61696	4.35532	4.34872	3.68378	3.65584	4.24191
ENSG00000065665	7.34164	7.59722	7.34428	7.37449	7.30163	7.56391	7.64005	7.42541	7.55691	7.83246	7.501	7.34829	7.45722	7.41506	7.41215	7.50464	7.44833	7.5074	7.46731	7.2939	7.18419	7.03306	7.0738
ENSG00000065675	4.7387	4.43273	4.51996	4.50476	4.46617	4.62421	4.3591	4.71799	4.57849	4.65201	4.7931	4.43639	4.65764	4.74856	4.67286	4.6031	4.58977	4.78034	4.50556	4.74594	5.64051	5.51947	5.47326
ENSG00000065717	7.33121	7.41463	7.17059	7.25659	7.44165	7.0111	7.23523	7.18512	7.10134	7.3956	7.15524	6.92657	7.37182	7.00553	7.25268	7.19621	6.73483	7.09888	7.06914	6.9932	6.01564	5.59068	5.7006
ENSG00000065802	9.02786	8.95574	9.1828	8.96204	9.03219	9.14926	9.05939	9.04853	8.96113	9.04245	9.11967	9.0299	9.00301	9.05284	9.08616	9.03174	9.05486	9.00683	9.06308	9.09101	9.13932	9.30086	9.22377
ENSG00000065809	11.8689	11.8246	11.8937	11.7818	11.872	11.9084	11.856	11.7914	11.8767	11.8786	11.8205	11.849	11.7858	11.9263	11.89	11.7857	11.879	11.694	11.7072	11.7441	11.4485	11.3543	11.4014
ENSG00000065833	9.84598	9.76034	9.85639	9.72441	9.75188	9.92033	9.89011	9.70093	10.0071	9.848	9.90707	10.03	9.93767	10.0449	9.96935	9.9377	10.046	10.1627	10.0888	10.0958	10.1559	10.0956	10.0681
ENSG00000065882	9.63752	9.59163	9.50205	9.45974	9.41644	9.48211	9.55573	9.46935	9.53707	9.47323	9.45894	9.57129	9.48194	9.51081	9.65138	9.58145	9.69642	9.68539	9.72643	9.71207	9.7865	9.76192	9.59429
ENSG00000065883	10.1354	10.0823	10.1406	10.2517	10.1415	10.088	10.1184	10.1685	10.2607	10.1514	10.1713	10.1201	10.1372	10.2325	10.1931	10.2533	10.1914	10.2446	10.2834	10.3049	10.2245	10.241	10.3253
ENSG00000065911	9.5322	9.52438	9.75746	9.42372	9.28782	9.19498	9.23584	9.41241	9.51877	9.26634	9.44671	9.49945	9.54572	9.6308	9.6272	9.73893	9.73415	9.68152	9.64107	9.69129	9.35048	9.58576	9.45388
ENSG00000065923	9.12764	9.11237	9.12954	9.08243	9.06504	9.13829	9.22018	9.09936	9.28128	9.08155	9.03781	9.21806	9.12807	9.08375	9.17781	9.08945	9.22614	9.16493	9.16445	9.11522	9.36189	9.3967	9.43963
ENSG00000065970	8.4133	8.50485	8.38977	8.41363	8.51483	8.30438	8.42053	8.52401	8.53295	8.45224	8.34281	8.42822	8.51814	8.33148	8.27932	8.42525	8.48016	8.49463	8.40387	8.51346	8.60129	8.56719	8.44456
ENSG00000065978	12.3837	12.3554	12.398	12.3773	12.423	12.4057	12.4671	12.4675	12.4392	12.4491	12.3912	12.3634	12.4106	12.4204	12.4417	12.4808	12.4925	12.5387	12.4315	12.4108	12.8554	12.8171	12.8357
ENSG00000065989	5.42802	5.51815	5.54352	5.5637	4.53031	4.74485	5.24317	5.07479	4.96239	5.47427	4.5708	4.87085	4.87184	4.84795	4.85048	5.28052	4.98975	5.12252	5.29234	5.09652	6.52517	6.63298	6.79809
ENSG00000066027	9.78234	9.85963	9.9477	9.93736	10.1011	10.0808	10.077	10.0911	10.0488	9.96877	10.0819	9.7801	9.96563	9.99025	9.97415	9.9505	9.9043	9.94534	9.85214	9.80427	10.119	10.1516	10.1217
ENSG00000066032	6.76112	6.94682	6.80208	7.03577	6.99569	7.14868	7.09349	6.84463	6.56455	7.20417	7.26143	7.03815	6.96844	6.69444	6.90925	6.77808	6.65841	6.3817	6.74587	6.32813	4.8652	5.03202	4.76512
ENSG00000066044	10.2013	10.1454	10.2203	10.2065	10.2104	10.2849	10.1156	10.2128	10.1474	10.1995	10.1286	10.1862	10.2299	10.207	10.2719	10.3162	10.2381	10.3312	10.2241	10.2436	10.2281	10.0169	10.1298
ENSG00000066084	10.2169	10.2323	10.2907	10.2805	10.2311	10.1858	10.2031	10.2357	10.1301	10.2192	10.1726	10.2976	10.1692	10.3043	10.1199	10.1035	10.1819	10.1664	10.1327	10.19	10.2183	10.3882	10.2399
ENSG00000066117	9.78997	9.71322	9.84542	9.68438	9.64005	9.67857	9.63658	9.71367	9.73678	9.70232	9.69086	9.87165	9.66718	9.69728	9.71587	9.67525	9.75998	9.80884	9.77409	9.8352	9.76823	9.78108	9.63613
ENSG00000066135	10.3088	10.0726	10.0705	10.1489	9.95542	10.0621	10.0522	9.97944	10.0071	10.1162	10.1451	10.0758	10.1274	10.085	10.0819	9.81243	10.0666	9.9896	9.94931	9.98791	9.88019	9.79787	9.69129
ENSG00000066136	9.33495	9.27073	9.54506	9.37425	9.48885	9.51218	9.5028	9.48004	9.49192	9.66276	9.50487	9.46879	9.41948	9.33782	9.3453	9.45343	9.43297	9.49998	9.42078	9.30393	9.15253	9.07531	9.1132
ENSG00000066185	4.01664	4.16687	4.67671	4.08022	4.46617	4.62421	4.11005	4.32111	4.63999	4.22527	4.07355	4.43639	3.7137	4.03011	4.60844	4.41891	4.52238	4.16335	4.12707	4.64316	3.4099	3.24941	2.98051
ENSG00000066230	4.81072	5.42277	5.11044	5.15353	5.48781	5.09963	5.50226	4.98249	5.32007	5.34428	5.72938	4.98962	5.33665	5.45699	5.54625	5.43681	4.54157	5.64757	5.9882	5.33216	5.42065	4.95998	5.41269
ENSG00000066248	8.21773	8.59349	8.26771	8.54237	8.7144	8.71582	8.58031	8.67314	8.59638	8.49791	8.65768	8.43276	8.62534	8.25206	8.40317	8.25228	8.19647	7.97208	8.11141	8.12737	7.54619	7.426	7.43152
ENSG00000066279	6.63114	6.38174	6.69616	6.45629	5.93768	5.88457	5.69972	6.37997	6.62663	5.92004	5.86811	6.00093	6.20399	6.2796	5.9344	5.93548	6.28418	5.97242	6.14235	5.97304	5.00487	5.06574	5.06158
ENSG00000066322	10.2408	10.0645	10.1271	10.0811	10.0501	10.1078	10.1641	10.1764	10.0935	10.1246	10.2403	10.2274	10.1767	10.1534	10.0685	10.1325	10.1737	10.2038	10.1688	10.0725	10.4853	10.5315	10.4649
ENSG00000066379	6.54352	6.79769	6.55515	6.5705	6.39929	6.54684	6.84396	6.53572	6.39653	6.74448	6.61472	6.65816	6.52199	6.29729	6.6298	6.58731	6.50973	6.68992	6.70504	6.76746	6.96223	6.81251	7.05148
ENSG00000066382	2.77413	2.81922	3.0039	2.76282	3.32828	3.09234	1.05974	1.63684	1.62346	2.89487	1.98892	1.06137	3.01257	1.95448	2.44783	2.28804	2.10338	2.62035	2.45752	2.70834	2.44467	2.68152	3.1013
ENSG00000066405	7.25603	7.02942	6.96297	7.05159	6.69349	6.87231	6.80251	6.97133	7.12304	6.88862	6.95112	6.96473	7.02547	7.25226	7.13184	6.93514	7.12392	7.66734	7.45505	7.77912	8.26161	8.2195	8.03849
ENSG00000066422	8.81237	8.77203	8.72811	8.76501	8.85253	8.86305	8.58031	8.74584	8.82211	8.75061	8.70976	8.85807	8.6938	8.71391	8.77741	8.82489	8.81894	8.85238	8.86185	8.78189	8.68935	8.66116	8.66391
ENSG00000066427	8.03705	8.40525	8.14782	8.21721	8.2785	8.21843	8.20415	7.99569	8.30511	8.04957	8.12482	8.26958	8.08039	8.28347	8.3401	8.05571	8.19647	8.30298	8.18006	8.4155	8.15693	8.2381	8.2295
ENSG00000066455	9.93303	9.8746	9.93869	10.1154	10.1064	10.0268	10.1156	10.0728	10.0317	10.0144	9.93067	10.1328	9.91219	10.0331	10.0878	10.0687	9.88598	10.0044	9.9195	9.98457	10.4024	10.5247	10.5824
ENSG00000066468	9.62263	9.45883	9.71289	9.6142	9.30854	9.01774	9.19371	9.47149	9.42361	9.21256	9.14763	9.3798	9.34525	9.43891	9.54568	9.24068	9.43984	9.36648	9.17757	9.35361	8.35595	8.11065	8.20948
ENSG00000066557	8.83837	8.93088	8.96951	8.92387	8.96415	8.98749	9.01168	8.9067	8.86782	9.02473	8.86483	9.08001	8.88777	9.04238	9.08616	8.90889	8.9846	8.87516	8.86185	8.88121	8.47485	8.74159	8.53044
ENSG00000066583	9.25997	9.32624	9.35124	9.48034	9.51088	9.50792	9.52633	9.34146	9.42142	9.58629	9.55319	9.35367	9.35196	9.40463	9.30522	9.35633	9.28324	9.17047	9.25564	9.108	8.93836	8.78018	8.84781
ENSG00000066629	7.78534	7.78328	7.56763	7.52939	7.87121	7.78404	7.73124	7.75625	7.67179	7.51465	8.01869	7.90108	7.54566	7.97264	7.90324	7.59436	7.95587	7.70851	7.76916	7.72353	8.26856	8.48858	8.53848
ENSG00000066651	7.25603	7.30837	7.45667	7.22902	7.18692	7.05844	7.44732	7.43423	7.21685	7.25066	7.18499	7.66652	7.14354	7.4939	7.57272	7.48131	7.63539	7.21771	7.53295	7.31912	7.40831	7.58559	7.74136
ENSG00000066654	9.2517	9.30153	9.18498	9.18998	9.18447	9.37869	9.12531	9.19075	9.09618	9.31818	9.2567	9.21014	9.32267	9.21054	9.43162	9.2682	9.41914	9.28717	9.24855	9.29971	9.22396	9.08767	9.24031
ENSG00000066697	9.40871	9.26506	9.32975	9.1538	9.16692	9.06486	9.17217	9.33205	9.21966	9.1567	9.23554	9.28243	9.28813	9.44488	9.49535	9.51791	9.45573	9.59223	9.53439	9.6254	10.2201	10.1998	10.1761
ENSG00000066739	9.87139	9.87646	9.91659	10.0519	10.0308	9.95044	9.92755	9.83694	9.94301	9.85804	9.87245	9.91615	9.88932	9.84744	9.82443	9.7857	9.89933	9.76561	9.79613	9.86405	9.76578	9.76192	9.81126
ENSG00000066777	10.4624	10.2976	10.3247	10.4646	10.2867	10.2799	10.4513	10.4575	10.3017	10.424	10.4741	10.4251	10.5251	10.3871	10.4189	10.3271	10.5328	10.4322	10.3428	10.4958	10.8109	10.9393	10.9269
ENSG00000066813	9.15551	9.1225	9.00784	9.26318	9.51886	9.68182	9.50236	9.29846	9.3125	9.30154	9.64221	9.27933	9.25891	9.2653	8.62426	8.79845	8.82423	7.87864	8.24659	8.3688	5.48696	5.52384	5.97078
ENSG00000066827	7.10507	7.25215	7.22238	7.61706	7.09447	7.09294	7.21431	7.13186	7.16549	7.28083	7.54754	7.1962	7.4489	7.39877	7.22072	7.44157	7.04207	7.29408	7.0033	7.47688	7.30398	7.05841	6.98239
ENSG00000066855	9.30596	9.42871	9.42678	9.58732	9.46238	9.45363	9.52208	9.39443	9.5085	9.42338	9.50487	9.55887	9.45105	9.5259	9.3254	9.29074	9.4444	9.17415	9.24143	9.28272	9.40035	9.42133	9.44249
ENSG00000066923	4.2533	2.84864	2.48522	3.86073	2.88777	3.82421	2.92488	3.08217	3.65919	4.27768	3.05222	3.29976	3.51006	2.29603	2.12941	2.39578	2.92492	2.48852	2.88647	3.35288	2.2894	2.31734	2.40815
ENSG00000066926	9.75139	9.72772	9.70835	9.74401	9.67948	9.68235	9.79644	9.67696	9.7173	9.76237	9.69259	9.87667	9.85512	9.84293	9.72729	9.84021	9.896	9.88938	9.83095	9.9324	9.26274	9.39505	9.28084
ENSG00000066933	7.8885	7.95512	7.68918	7.80612	7.52272	7.84605	7.76039	7.8777	7.83847	7.8627	7.79264	7.7921	7.59171	7.86997	7.90324	7.84034	7.78667	7.79228	7.89702	8.09366	8.59854	8.78271	8.74031
ENSG00000067057	8.38837	7.91947	8.01217	7.75872	7.53058	7.52232	7.23523	7.54432	7.81866	7.68229	7.69953	7.95263	7.85978	7.86997	8.04385	8.14749	7.93009	8.65591	8.20955	8.4155	10.6506	10.7841	10.6377
ENSG00000067064	12.5784	12.6745	12.574	12.7866	12.9759	13.071	13.0607	12.8121	12.8783	12.9359	13.0284	12.6917	12.7068	12.6316	12.3697	12.2898	12.3496	11.9348	12.0048	12.0002	11.5274	11.3359	11.3691
ENSG00000067066	9.34841	9.25265	9.39891	9.33601	9.51465	9.51056	9.4458	9.34146	9.3067	9.41585	9.47709	9.32838	9.43651	9.32494	9.51525	9.46113	9.58436	9.26044	9.29275	9.30315	9.20344	9.33164	9.17472
ENSG00000067082	12.502	12.4963	12.4323	12.4165	12.4593	12.459	12.4694	12.453	12.4028	12.471	12.5463	12.5937	12.5249	12.5169	12.5712	12.5195	12.5251	12.4185	12.3921	12.3829	12.414	12.4475	12.4807
ENSG00000067113	9.2517	9.25937	9.37813	9.26992	9.35578	9.17096	9.29682	9.31542	9.46456	9.39261	9.33175	9.3074	9.36085	9.14121	9.30522	9.22437	9.30345	9.3745	9.23068	9.2216	9.27831	9.09585	9.14867
ENSG00000067141	9.57481	9.28481	9.43045	9.44783	9.3469	9.33611	9.30673	9.3344	9.40601	9.29619	9.25202	9.32706	9.28346	9.47822	9.31282	9.43736	9.46698	9.33232	9.32465	9.37782	9.48331	9.46778	9.42524
ENSG00000067167	11.9461	11.8504	11.9366	11.9553	12.0021	11.9124	11.961	11.9324	11.9995	11.9502	11.8804	12.0158	11.9077	12.0709	11.833	11.8801	11.9934	11.8938	11.8016	11.8711	12.1627	12.2266	12.2475
ENSG00000067177	7.18287	7.07681	7.06712	7.03577	6.92419	6.94967	6.95658	7.01904	6.89444	6.92728	7.09541	7.24592	7.11249	6.86514	7.00645	7.03423	7.26822	7.30921	7.21275	7.44858	8.15768	8.36431	8.47327
ENSG00000067182	10.2056	10.1985	10.2361	10.3317	10.1051	10.1575	10.1226	10.1091	10.1593	10.1656	10.22	10.2049	10.198	10.221	10.0367	10.2302	10.1488	10.3678	10.2411	10.2611	10.947	10.9951	10.9962
ENSG00000067191	4.85972	3.71322	4.72539	4.90382	4.00662	4.34764	4.19793	3.77179	3.37366	4.90545	4.37824	5.28696	4.18349	4.40124	4.31743	4.41891	4.12811	4.43269	4.98642	4.28186	5.33112	5.25299	5.30739
ENSG00000067208	9.14263	8.94159	9.05293	8.94942	8.99573	8.85301	8.84135	9.10214	9.06569	8.95158	8.96252	8.99344	9.06418	9.045	8.81	8.90012	8.9846	8.94573	8.93651	8.94472	9.10286	9.12012	9.21711
ENSG00000067221	7.95113	8.11497	7.98243	7.85202	8.04595	7.86614	7.91101	8.13755	7.92132	8.10122	7.90414	7.8408	8.0587	7.97264	8.07993	8.15734	7.96224	8.25862	8.03521	8.22402	8.64732	8.53144	8.47003
ENSG00000067225	11.9198	11.3218	11.7722	11.3852	11.0183	10.8227	10.7806	11.3298	11.4704	11.1103	11.0937	11.2951	11.214	11.607	11.1634	11.1989	11.3068	11.3912	11.1984	11.2209	12.3401	12.3143	12.2826
ENSG00000067248	9.45026	9.56649	9.52973	9.52918	9.4989	9.49292	9.50925	9.49488	9.58868	9.59232	9.60178	9.62391	9.50218	9.58111	9.54997	9.5612	9.65375	9.41548	9.45812	9.5005	9.41608	9.36996	9.41508
ENSG00000067334	9.49998	9.42108	9.44869	9.42068	9.34244	9.44698	9.23584	9.42575	9.4453	9.4601	9.49303	9.45322	9.42585	9.49557	9.50644	9.46339	9.55603	9.65938	9.7226	9.7057	10.0102	9.96429	10.0344
ENSG00000067365	8.45712	8.3474	8.31619	8.19601	8.48277	8.40394	8.55972	8.34836	8.45381	8.62686	8.51273	8.35827	8.25271	8.20597	8.54331	8.40059	8.35014	8.56076	8.51139	8.50981	8.33955	8.4761	8.56498
ENSG00000067369	9.40871	9.29319	9.30394	9.3899	9.25735	9.24187	9.32148	9.34614	9.32874	9.30723	9.27526	9.39152	9.31354	9.36743	9.36005	9.34345	9.42377	9.44013	9.42078	9.5278	9.75963	9.93494	9.90551
ENSG00000067445	8.88902	8.97671	8.94659	8.86689	8.80146	8.82592	8.79631	8.91618	8.7646	8.84452	8.80543	8.98108	8.7792	8.9221	8.92688	8.90305	8.74695	8.83622	8.71019	8.96617	8.50163	8.53445	8.46722
ENSG00000067533	8.13022	8.22422	8.02681	8.10797	8.24066	8.21843	8.09393	8.22153	8.36097	8.31316	8.16517	8.1859	7.85978	8.37379	8.43138	8.16712	8.34528	8.25515	8.29802	8.39192	8.41975	8.29961	8.35325
ENSG00000067560	12.149	12.1321	12.1416	12.1662	12.1851	12.1647	12.2092	12.1355	12.1348	12.1596	12.2023	12.1826	12.2005	12.2408	12.2028	12.1504	12.2023	12.1986	12.0989	12.0957	12.5272	12.5385	12.5385
ENSG00000067596	9.22379	9.14361	9.24673	9.24262	9.19934	9.35282	9.30673	9.33911	9.35878	9.14854	9.16763	9.28997	9.30895	9.39028	9.31534	9.25908	9.29591	9.45835	9.31111	9.37582	9.45618	9.38172	9.51903
ENSG00000067606	9.6162	9.71114	9.64334	9.66651	9.65451	9.58065	9.65222	9.69359	9.46456	9.61914	9.64344	9.51239	9.64369	9.57387	9.67516	9.61221	9.64981	9.69695	9.58309	9.62034	10.389	10.2036	10.3121
ENSG00000067704	10.6957	10.7009	10.6831	10.7407	10.795	10.8218	10.7141	10.6991	10.8005	10.7548	10.6943	10.7595	10.7684	10.8881	10.8058	10.7422	10.7944	10.6657	10.5793	10.5964	10.5279	10.4252	10.4379
ENSG00000067715	5.02411	4.8513	5.17426	5.09915	5.13614	5.10189	5.06766	4.71799	4.96239	5.18618	5.11492	5.11663	5.14323	4.94093	4.90514	5.28052	5.38076	5.09173	4.50556	5.01653	5.5059	5.59068	4.90445
ENSG00000067798	5.30553	5.85658	5.92324	5.51888	5.93768	6.27357	6.11534	6.14211	5.88927	5.92004	5.9162	5.92554	5.44029	6.08961	6.15342	5.98055	5.657	5.75385	5.81788	5.83994	5.30433	5.39237	4.61088
ENSG00000067829	8.5634	8.36871	8.41595	8.47944	8.39074	8.47107	8.42053	8.35767	8.47927	8.47199	8.48111	8.15872	8.36746	8.2611	8.36955	8.48902	8.4073	8.30298	8.31847	8.33535	8.82747	8.91345	8.84132
ENSG00000067836	8.81984	9.07721	8.74591	8.77458	8.80146	8.75944	8.86503	8.84011	8.67928	8.91433	8.81497	8.76381	8.89391	8.78147	8.77741	8.93774	8.66729	8.78395	8.64152	8.63227	8.1644	8.14654	7.97272
ENSG00000067900	10.6814	10.6841	10.6126	10.7021	10.773	10.8123	10.8307	10.8064	10.7444	10.8235	10.7328	10.8264	10.705	10.8321	10.7315	10.7295	10.6942	10.6588	10.655	10.8102	10.7331	10.8491	10.8331
ENSG00000067955	9.21814	8.89094	9.07423	8.8758	8.85253	8.79481	8.63249	8.80148	8.80878	8.81904	8.91302	9.09156	9.01995	9.00249	9.09794	8.92339	8.9846	9.0455	8.9343	9.00036	9.59943	9.57702	9.52714
ENSG00000067992	8.9786	8.91286	9.03132	9.07084	9.3469	9.3903	9.3385	9.28647	9.23718	9.04245	8.99647	9.13404	9.19673	9.19883	9.20802	8.90012	9.03081	8.8729	8.95404	8.98992	8.02777	7.9348	8.0271
ENSG00000068001	9.69354	9.64281	9.67621	9.53482	9.46238	9.40868	9.41361	9.5033	9.47935	9.36118	9.54174	9.63776	9.55543	9.6533	9.46611	9.59057	9.49142	9.66593	9.61099	9.47641	9.70178	9.51125	9.46799
ENSG00000068024	8.11814	7.94097	8.1831	8.15266	7.87739	7.99337	8.04145	8.09922	7.89633	8.19927	7.94528	8.15323	8.11759	7.97264	7.98797	8.18166	8.07237	8.13949	8.19856	8.10337	8.05213	7.98413	8.06472
ENSG00000068028	8.31619	8.15845	8.24285	8.06964	8.11556	7.65911	7.69394	8.01347	8.24205	8.13465	8.10939	8.20197	8.03111	8.23839	8.17197	8.12258	7.9749	8.23416	8.20955	8.14158	8.41662	8.43799	8.59358
ENSG00000068078	10.7564	10.8265	10.7226	10.8578	10.7075	10.6451	10.7491	10.7948	10.7473	10.8011	10.7764	10.7685	10.8039	10.7448	10.7667	10.8007	10.64	10.7812	10.7166	10.6904	9.79012	9.53552	9.61852
ENSG00000068079	6.80699	7.08198	7.2476	6.79386	7.36457	7.53073	6.949	7.16405	7.01111	7.21984	7.28909	7.10802	7.14354	7.34023	6.99994	7.34148	7.11251	7.12952	7.07716	7.11342	6.59315	6.27776	6.36341
ENSG00000068097	7.95113	8.05709	8.00232	8.1745	8.49889	8.32389	8.32617	8.28634	8.18645	8.15922	8.10939	8.21785	8.00298	8.21531	8.3744	8.06096	8.19647	8.2271	8.13466	8.13212	8.14188	8.01466	8.0309
ENSG00000068120	10.1984	10.2482	10.1418	10.3186	10.2691	10.3493	10.3277	10.2306	10.2837	10.3189	10.3306	10.1849	10.2383	10.1881	10.268	10.3151	10.2156	10.4214	10.3319	10.3402	10.6874	10.6376	10.6308
ENSG00000068137	7.75445	8.03726	7.94181	7.88771	8.08385	8.05884	8.0175	7.80471	7.97003	7.89232	8.31169	7.95263	8.075	7.7658	7.79885	7.81568	7.80096	8.02193	7.95041	8.00317	7.65092	7.57976	7.68931
ENSG00000068305	9.98717	10.0113	9.96046	9.95639	10.0377	10.0298	9.99196	9.86169	10.0573	10.0477	10.0351	10.1713	10.0858	9.96002	10.0182	9.87045	10.083	9.92474	9.99872	9.97402	9.9553	10.0212	10.021
ENSG00000068308	10.5437	10.6604	10.659	10.6669	10.6482	10.65	10.6687	10.6517	10.6563	10.6619	10.6743	10.6728	10.6364	10.6872	10.5415	10.5519	10.6048	10.6158	10.585	10.6388	10.8025	10.7879	10.7751
ENSG00000068323	11.521	11.4417	11.3746	11.3343	11.282	11.2155	11.2105	11.262	11.3387	11.3183	11.3689	11.364	11.4243	11.3736	11.3187	11.378	11.4297	11.5358	11.5866	11.542	11.5863	11.5756	11.5274
ENSG00000068354	8.85648	8.77566	8.77375	8.63937	8.71775	8.61602	8.68552	8.54433	8.76794	8.70126	8.73642	8.60748	8.59367	8.67688	8.61392	8.48902	8.74307	8.54664	8.56372	8.57041	8.62273	8.56577	8.69987
ENSG00000068366	14.2893	14.3153	14.2458	14.4692	14.6038	14.6563	14.6364	14.4548	14.5186	14.5236	14.5499	14.4054	14.36	14.4338	14.0743	14.0118	14.0956	13.6176	13.6458	13.718	13.0765	12.9722	12.9833
ENSG00000068383	9.89282	9.86526	9.78212	9.95849	9.87278	9.79318	9.82949	9.84524	9.83374	9.88285	9.89961	9.87333	9.85197	9.83386	9.91545	9.81555	9.82261	9.82531	9.7007	9.7057	9.77557	9.81369	9.78219
ENSG00000068394	7.97812	7.91223	8.11166	8.13792	7.99572	8.06465	8.09393	7.96557	7.97003	8.03194	8.02966	8.12542	7.89081	8.24752	8.29476	8.02914	8.15257	8.07405	8.12695	8.02378	8.08004	8.15831	8.0795
ENSG00000068400	10.4624	10.4946	10.3453	10.5282	10.3491	10.4614	10.4657	10.3071	10.4127	10.5517	10.4104	10.3597	10.3937	10.2655	10.5066	10.4564	10.3853	10.4322	10.6197	10.5358	10.3993	10.2511	10.3082
ENSG00000068438	8.30557	8.06363	8.02194	8.27226	8.10507	7.80501	8.15559	8.06553	8.17091	8.01408	8.13501	8.11414	8.0587	8.1041	8.06801	7.87059	8.12444	8.19124	7.92396	8.24172	8.76006	8.79784	8.81948
ENSG00000068489	5.57667	4.72481	5.40095	4.40975	4.81416	4.90879	3.80886	4.98152	4.57849	5.18618	4.50942	4.81624	4.5373	5.11064	4.9578	5.16814	4.93897	4.27719	4.30156	4.28186	3.68378	3.65584	4.0147
ENSG00000068615	6.37101	6.31744	6.4862	6.5705	6.36453	6.92434	6.63944	6.80435	6.44902	6.76597	6.75353	6.32814	6.0365	6.50949	6.56338	6.60181	6.30438	6.02225	6.07984	6.07528	6.37876	6.59885	6.28906
ENSG00000068650	10.9964	11.0556	11.0299	11.1683	10.9707	11.0283	11.0292	10.9155	10.9762	11.0514	11.0248	11.1181	11.0865	11.0017	10.9222	10.9183	10.9957	11.014	10.9524	11.0594	11.2399	11.3084	11.2398
ENSG00000068654	10.1369	10.0759	10.0705	10.048	9.99289	10.0908	9.9467	10.0841	10.0741	10.0455	10.1003	10.23	10.225	10.2553	10.1682	10.1287	10.1062	10.2783	10.2313	10.2622	10.079	10.0863	9.99301
ENSG00000068697	11.4133	11.3095	11.3765	11.3416	11.5482	11.4224	11.4379	11.3979	11.3933	11.437	11.3999	11.4336	11.429	11.4728	11.3875	11.3685	11.5118	11.2939	11.2715	11.3221	11.6438	11.7265	11.7501
ENSG00000068724	8.75501	8.76802	8.83456	8.80756	8.69004	8.74505	8.70177	8.86813	8.88697	8.77732	8.84943	8.72357	8.72857	8.52034	8.70223	8.72249	8.68281	8.62668	8.58919	8.71695	8.90308	8.74159	8.82388
ENSG00000068745	10.8332	10.8485	10.8329	10.7993	10.7153	10.8054	10.7132	10.8303	10.8607	10.851	10.8362	10.6881	10.7165	10.7072	10.6089	10.7857	10.7646	10.6618	10.6429	10.6371	10.0996	9.91774	10.1038
ENSG00000068784	7.16502	7.34108	7.17935	7.44805	7.39933	7.12664	7.48274	7.31505	7.30493	7.31039	7.19477	7.31913	7.38059	7.47847	7.40269	7.48131	7.31527	7.26678	7.20713	7.37632	7.42706	7.4195	7.55299
ENSG00000068796	8.76279	8.46583	8.59363	8.60804	8.58447	8.3479	8.56799	8.48206	8.50842	8.56075	8.58144	8.7602	8.65818	8.72376	8.56892	8.57234	8.44419	8.56917	8.66832	8.6154	8.99809	9.1341	9.11679
ENSG00000068878	10.575	10.4175	10.4976	10.4211	10.4101	10.5838	10.4855	10.5729	10.5562	10.4475	10.4406	10.5178	10.534	10.6052	10.6314	10.5453	10.63	10.6111	10.6341	10.6545	11.1067	11.292	11.1616
ENSG00000068885	7.99142	7.8454	7.9025	8.01436	7.91992	8.04322	8.0882	7.83954	7.829	7.93089	7.9567	8.09202	8.16405	7.91077	8.03775	7.92347	7.88466	7.90394	7.98821	8.00322	8.13809	8.13428	8.1686
ENSG00000068903	9.76113	9.74412	9.69619	9.79424	9.69879	9.74879	9.82777	9.68437	9.85172	9.93833	9.89812	9.84121	9.78087	9.77352	9.69856	9.78887	9.68491	9.75214	9.83568	9.78479	9.64285	9.58867	9.54189
ENSG00000068912	9.5503	9.55724	9.53827	9.60351	9.68301	9.6324	9.62474	9.70458	9.7403	9.61914	9.5029	9.61194	9.61425	9.6533	9.55425	9.64407	9.67331	9.54329	9.49601	9.59475	10.045	10.3798	10.3591
ENSG00000068971	8.94821	8.85364	8.92852	8.86241	8.83359	8.84291	8.73887	8.70266	8.95207	8.81389	8.93944	8.83421	8.97722	8.88162	8.80641	8.79682	8.93687	8.76483	9.03452	8.83241	9.00226	9.08562	9.31715
ENSG00000068976	3.5252	3.84069	3.2894	3.65243	3.81391	3.26368	3.10297	2.64953	3.37366	2.54308	1.98892	3.81178	3.18269	1.95448	3.13716	3.28375	3.29167	3.18448	3.0854	2.70834	2.23369	3.46689	2.15262
ENSG00000069011	4.38253	4.8513	4.34409	3.27513	4.70723	4.80159	4.19793	4.59743	3.8607	4.34436	4.5708	3.69556	4.96809	4.74856	3.9525	3.42086	4.21606	4.3827	3.77919	3.79873	5.59702	5.1624	5.49548
ENSG00000069020	9.54354	9.49319	9.49855	9.50353	9.39722	9.38566	9.43434	9.44771	9.46243	9.46996	9.28215	9.27739	9.54767	9.36114	9.37465	9.35846	9.50675	9.37769	9.37758	9.47641	9.35375	9.39836	9.33881
ENSG00000069188	7.21124	7.08198	6.95279	7.43605	6.65084	6.33252	6.73066	7.20589	6.72924	7.00165	6.72682	6.79154	7.06953	7.24316	7.10873	6.88861	6.95529	7.18162	7.22889	7.13252	8.59024	8.60781	8.72864
ENSG00000069248	9.57481	9.45635	9.42125	9.48908	9.54232	9.54785	9.68681	9.43678	9.57693	9.44019	9.44671	9.56716	9.48194	9.6308	9.59014	9.4831	9.46922	9.47484	9.40174	9.44046	9.126	9.28664	9.31871
ENSG00000069275	11.4967	11.5506	11.5308	11.7051	11.7913	11.7289	11.8001	11.701	11.7521	11.6877	11.6625	11.6487	11.6194	11.6605	11.6125	11.557	11.5025	11.39	11.3662	11.4074	10.76	10.7954	10.7267
ENSG00000069329	10.9923	10.8617	10.9905	10.9713	10.9743	10.9513	10.9017	10.9147	10.971	10.9819	10.9233	11.0218	10.9794	11.117	11.1258	11.0209	11.0378	11.049	10.9821	11.0163	11.1859	11.2632	11.2835
ENSG00000069345	10.1339	10.1205	10.1585	9.99167	9.9685	9.99217	10.0224	10.098	10.1645	10.1329	10.07	10.0888	10.1255	10.2302	10.2615	10.1597	10.2499	10.3782	10.1995	10.2762	10.1783	10.1836	10.1752
ENSG00000069399	9.08483	9.14978	9.12047	8.99104	8.97283	8.99359	8.88171	9.04277	8.8386	8.81389	9.01867	8.76381	8.84722	8.846	8.75898	8.9406	8.82245	8.7427	8.83844	8.87839	9.13363	9.02692	8.94786
ENSG00000069424	5.07499	4.58615	4.98731	4.19863	4.76169	4.74485	3.80886	4.53315	3.8607	4.34436	4.23392	4.28374	4.8212	3.85002	4.39587	4.6031	4.21606	4.78034	4.40716	5.09652	3.98308	4.40013	4.29353
ENSG00000069482	3.37086	3.71322	4.07028	3.65243	3.70696	2.89786	1.66408	2.38397	3.05032	2.07686	2.31011	3.43059	2.59694	2.75521	2.11834	3.54607	3.9343	3.97374	2.64189	3.35419	6.44158	6.41488	6.35128
ENSG00000069493	6.7738	6.83935	6.90223	6.8818	6.94564	7.11303	6.6457	7.18867	6.93599	6.81154	7.11502	6.63215	6.79742	6.48392	7.16592	7.01388	6.98801	6.70241	7.09157	7.30556	6.53891	6.59596	6.6983
ENSG00000069509	7.47075	7.49435	7.45667	6.97069	7.32894	7.25409	6.93628	7.34344	7.19652	7.46295	7.29819	7.26918	7.39798	7.38228	7.3544	7.65817	7.42083	7.3275	7.33306	7.28539	7.344	7.14769	7.2798
ENSG00000069535	11.0601	11.2583	11.2197	11.3991	11.5612	11.6461	11.6069	11.4374	11.3485	11.4872	11.5073	11.3835	11.4206	11.2699	11.3174	11.2952	11.3192	11.1016	11.0921	11.0656	9.72596	9.65938	9.65105
ENSG00000069667	8.72346	8.79582	8.80656	8.79352	8.85879	8.82249	8.96235	8.83852	8.75072	8.89904	8.94525	8.76381	8.87541	8.86689	8.73654	8.84939	8.80483	8.69485	8.9053	8.88966	8.67111	8.63894	8.62666
ENSG00000069696	3.90857	3.57338	4.51996	4.75716	4.25462	3.79768	4.28076	4.59743	3.75348	4.09546	4.62966	4.11301	4.01346	2.94675	4.39587	4.12984	3.9343	4.61696	4.88038	4.88757	4.49054	3.82288	3.81722
ENSG00000069702	5.61156	5.39894	5.40095	5.60717	5.49876	5.46014	5.36207	5.24498	5.7001	4.98091	5.93965	5.67238	6.10161	6.20658	6.08404	5.65879	5.74832	5.3989	5.26451	5.2443	5.19189	5.1624	4.83646
ENSG00000069812	4.29939	4.06612	4.40512	4.19863	3.32828	3.55525	3.27447	4.65897	3.22103	3.61661	3.98614	3.91933	4.87184	4.03011	3.72834	3.42086	4.03446	3.97374	4.06389	3.59351	4.8652	4.55058	4.69006
ENSG00000069849	9.39376	9.14361	9.29993	9.29007	9.13633	9.21078	9.01168	9.28647	9.24957	9.1809	9.17753	9.15069	9.15132	9.06837	9.27959	9.19599	9.28832	9.23353	9.39854	9.20816	9.91823	9.97985	10.1038
ENSG00000069869	9.66476	9.60066	9.61455	9.73424	9.6581	9.75957	9.64051	9.62393	9.55315	9.74624	9.65589	9.8916	9.78748	9.87862	9.82443	9.76008	9.78176	9.7595	9.63156	9.66857	9.66145	9.9395	9.85379
ENSG00000069943	6.71374	6.90368	6.82459	6.81255	6.73491	7.0111	6.92345	6.93447	6.85128	6.78715	6.86798	7.16376	6.71466	6.69444	6.78359	6.81587	7.05405	6.65875	6.71536	6.91814	6.7303	6.55204	6.73414
ENSG00000069956	11.399	11.3428	11.376	11.4737	11.4787	11.4882	11.5088	11.4052	11.4778	11.371	11.4726	11.4433	11.4712	11.495	11.5242	11.4579	11.528	11.4893	11.4009	11.493	11.5973	11.6462	11.6978
ENSG00000069966	8.60727	8.78	8.68875	8.46179	8.78512	8.78429	8.79982	8.77045	8.85491	8.69567	8.85561	8.72357	8.84087	8.60091	8.61884	8.74225	8.75798	8.73525	8.59479	8.63896	8.79416	9.02906	8.95989
ENSG00000069974	8.63721	8.70772	8.71491	8.71686	8.77523	8.75255	8.72222	8.81553	8.69396	8.55539	8.73689	8.78558	8.82592	8.85842	8.86367	8.72911	8.70578	8.6389	8.66452	8.75068	9.56016	9.55207	9.61413
ENSG00000069998	8.11206	8.37924	8.28405	8.27899	8.32897	8.20798	8.28664	8.4212	8.53295	8.09274	8.28904	8.25426	8.38064	8.32718	8.31003	8.43742	8.56215	8.5381	8.41023	8.53156	8.4445	8.22324	8.31004
ENSG00000070010	10.2098	10.1516	10.1881	10.158	10.0745	10.1818	10.1282	10.1008	10.0921	10.0564	10.1106	10.1632	10.0696	10.1002	10.3504	10.284	10.1928	10.2065	10.2553	10.2848	10.1653	10.196	10.1889
ENSG00000070018	10.1606	10.1361	10.1761	10.3235	10.1581	10.2226	10.3434	10.2395	10.2434	10.2133	10.0898	10.2571	10.2788	10.2337	10.2926	10.2325	10.221	10.1347	10.1269	10.2524	9.64285	9.55196	9.59814
ENSG00000070019	2.77413	3.71322	3.52763	4.08022	3.00618	4.09871	3.56627	3.87912	3.75348	3.17748	2.79469	2.68585	2.81967	2.53429	4.85048	2.77102	3.58383	3.18448	3.42414	3.89134	2.44467	3.127	2.54223
ENSG00000070047	10.5594	10.5655	10.5045	10.524	10.3635	10.4876	10.5338	10.4368	10.4731	10.6417	10.6839	10.617	10.6235	10.5305	10.6191	10.6405	10.5445	10.8454	10.7433	10.7024	10.5643	10.6108	10.4969
ENSG00000070061	11.0735	11.2697	11.1287	11.3058	11.4848	11.5583	11.5291	11.4103	11.3543	11.4668	11.4209	11.195	11.2268	11.1618	11.1863	11.1785	11.1558	10.8286	10.9638	10.9418	10.3403	10.305	10.2948
ENSG00000070081	9.2517	9.45883	9.39515	9.37425	9.39291	9.56434	9.36721	9.41241	9.58477	9.44686	9.48309	9.41008	9.10709	9.45279	9.3304	9.33262	9.35521	9.19602	9.2871	9.19687	10.1966	10.3085	10.33
ENSG00000070087	10.2027	10.1392	10.1451	10.1905	10.0745	10.1507	10.1014	10.1579	10.1724	10.1837	10.1849	10.2221	10.2905	10.253	10.3129	10.2806	10.3098	10.3378	10.3134	10.3637	10.5714	10.6488	10.57
ENSG00000070159	9.2872	9.29598	9.44142	9.32629	9.48278	9.43133	9.39537	9.31542	9.47935	9.40979	9.42195	9.42612	9.41735	9.52402	9.47291	9.52743	9.61181	9.50144	9.57178	9.67347	10.1285	10.2187	10.2988
ENSG00000070214	10.3851	10.585	10.4522	10.5815	10.7426	10.7659	10.7948	10.7317	10.5965	10.6019	10.6612	10.626	10.6031	10.5883	10.614	10.596	10.6129	10.4376	10.4126	10.3687	10.1093	10.0812	10.0134
ENSG00000070269	8.54547	8.35275	8.43071	8.27226	8.53452	8.42667	8.33104	8.6694	8.57292	8.43892	8.41152	8.35348	8.54959	8.40676	8.41734	8.48902	8.44419	8.40042	8.57509	8.50615	8.40721	8.32767	8.3441
ENSG00000070366	9.86418	9.78234	9.68239	9.78717	9.77358	9.82774	9.92272	9.7281	9.81553	9.78623	9.81654	9.6766	9.70434	9.78611	9.70243	9.66147	9.71918	9.84275	9.77902	9.8569	9.81525	9.76577	9.79456
ENSG00000070367	10.0438	10.0363	9.9729	9.89848	9.88663	9.93305	10.0026	10.0063	9.93833	9.91685	9.96533	10.0938	10.0198	10.1137	9.92036	9.88821	10.0187	9.99086	9.92055	10.0588	10.1455	10.2589	10.2891
ENSG00000070371	8.24576	8.18871	8.22179	8.33178	8.17194	8.09334	8.26136	8.16433	8.18129	8.25354	8.25205	8.10847	8.29971	8.04249	8.20502	8.21032	8.2126	8.01784	8.14232	8.31877	7.60774	7.47073	7.488
ENSG00000070404	11.8992	12.1754	12.1664	12.1054	12.208	12.1842	12.2075	12.0027	11.8554	12.0212	12.1738	11.8146	11.8932	11.7257	11.652	11.7793	11.5355	11.1141	11.1682	11.0706	10.584	10.6509	10.5126
ENSG00000070413	11.3884	11.3246	11.282	11.3392	11.2568	11.2699	11.27	11.3173	11.2783	11.3418	11.3301	11.1903	11.2128	11.2536	11.1829	11.1906	11.1085	11.1411	11.0906	11.1024	10.8856	10.722	10.6928
ENSG00000070423	9.807	10.018	9.97312	10.0019	9.6491	9.80016	9.84319	9.97944	9.86627	9.92884	10.0567	9.75309	9.96854	9.70392	9.8048	10.006	9.83307	9.90606	9.82381	9.67997	9.73476	9.70689	9.79903
ENSG00000070444	8.85666	9.01437	8.90229	8.98281	8.71095	8.97828	8.8138	8.85833	8.87743	8.87452	8.98242	8.81345	8.88777	8.83998	8.96918	8.98827	8.67507	9.20324	9.08313	8.84982	8.92962	8.96573	8.95789
ENSG00000070476	9.18667	9.2904	9.23627	9.34245	9.23587	9.30456	9.39537	9.24693	9.33805	9.21647	9.31167	9.44424	9.27172	9.14854	9.28217	9.35419	9.15282	9.31576	9.42707	9.48943	9.261	9.41317	9.42234
ENSG00000070495	8.35273	8.3474	8.16557	8.29901	8.38642	8.32389	8.33104	8.44323	8.50842	8.43892	8.52053	8.27971	8.29043	8.54277	8.51722	8.30195	8.25992	8.37826	8.3618	8.46907	8.62314	8.57599	8.7725
ENSG00000070501	7.82303	7.85298	7.59408	7.83383	7.80144	7.49677	7.94315	7.80471	7.61932	7.6595	7.97396	7.78501	7.56117	7.94485	8.06801	7.69243	7.96224	7.95508	7.88336	8.05914	8.01956	7.77074	7.746
ENSG00000070526	2.17132	1.14507	2.17339	3.0416	1.58967	3.68155	1.05974	2.64953	3.63764	3.79447	2.31011	2.41891	2.33342	2.94675	2.44783	2.54965	1.06974	2.62035	1.69882	2.48879	1.98648	0.826693	2.36053
ENSG00000070540	8.65404	8.33662	8.37458	8.26549	8.2262	8.21843	8.32617	8.32007	8.54505	8.21499	8.38186	8.48184	8.2764	8.63957	8.17753	8.17683	8.4073	8.42841	8.27728	8.27647	9.44089	9.52495	9.48751
ENSG00000070601	5.21769	5.85658	5.69786	5.60717	6.25489	6.35165	5.94802	5.53486	5.91438	6.03073	5.86811	5.97623	5.92101	5.18855	5.47396	5.88896	5.41833	5.15266	5.44892	5.40999	4.17276	1.34893	2.98051
ENSG00000070610	10.5628	10.6669	10.6488	10.6226	10.6927	10.6058	10.6591	10.6036	10.6785	10.6078	10.6146	10.7108	10.5632	10.5883	10.5965	10.688	10.6637	10.6446	10.7807	10.7504	10.5031	10.5064	10.4407
ENSG00000070614	12.2852	12.3446	12.3049	12.3573	12.3083	12.3835	12.3432	12.3038	12.2729	12.3392	12.329	12.2858	12.2652	12.2836	12.1529	12.1679	12.1523	12.0574	12.0473	12.0141	11.5511	11.5683	11.4964
ENSG00000070669	11.1715	11.1842	11.2791	11.0314	11.1691	11.1123	11.1283	11.0292	11.0687	11.0827	11.1958	11.4489	11.2866	11.3636	11.6992	11.6072	11.6572	11.8107	11.7636	11.7732	11.7101	11.7145	11.7264
ENSG00000070718	7.02969	7.22903	7.19672	6.73629	7.007	7.17039	7.12746	7.25653	7.18625	7.25066	7.23324	7.22793	7.11228	7.19678	7.18802	7.13772	7.17967	6.95234	7.14742	7.21546	7.56324	7.48326	7.63532
ENSG00000070756	13.0141	13.0311	13.0294	13.0229	13.0839	13.0818	13.0305	13.0477	13.0272	13.0098	13.0239	13.0588	13.0738	13.0876	13.0993	13.0803	13.0577	13.1123	13.0716	13.0634	13.4645	13.467	13.462
ENSG00000070759	6.63114	6.78189	6.4862	6.63493	6.94952	6.67385	6.99879	6.74883	6.67151	6.80075	6.86798	6.52828	6.66656	6.56897	6.70875	6.63037	6.70475	6.11703	6.0145	6.43967	5.33112	5.63627	5.56013
ENSG00000070761	7.95793	7.91947	8.11166	7.63817	7.93777	7.93116	7.84449	7.97769	7.96403	7.90206	7.81817	8.24395	7.87228	7.78474	8.06801	7.83422	8.16919	7.8113	7.88336	7.76695	7.76829	8.02326	8.00016
ENSG00000070770	10.2955	10.2525	10.2288	10.2449	10.2668	10.2985	10.3081	10.1579	10.1827	10.2689	10.1874	10.2597	10.1943	10.3861	10.2745	10.2325	10.3758	10.3246	10.2642	10.2954	10.3296	10.357	10.353
ENSG00000070778	10.7388	10.7144	10.7588	10.6898	10.6153	10.7416	10.6416	10.7055	10.7048	10.7345	10.7097	10.7033	10.6752	10.7472	10.6654	10.7041	10.6965	10.6313	10.4709	10.6024	10.3279	10.3689	10.3507
ENSG00000070785	7.63236	7.65907	7.51322	7.6997	7.53058	7.42635	7.5343	7.52792	7.61932	7.6009	7.38618	7.45938	7.58414	7.57592	7.57272	7.5502	7.73551	7.66734	7.49752	7.49175	7.69799	7.85027	7.82706
ENSG00000070814	9.87139	9.80205	9.89281	9.74401	9.62176	9.58267	9.72429	9.76879	9.73502	9.68831	9.70975	9.77831	9.87543	9.84443	9.85252	9.79677	9.80321	9.87476	9.84393	9.74966	9.33567	9.29377	9.3109
ENSG00000070831	12.3539	12.2322	12.3233	12.1987	12.2789	12.2881	12.2687	12.2703	12.3357	12.2333	12.2705	12.2614	12.2726	12.3784	12.3651	12.2802	12.3467	12.2668	12.218	12.2133	12.1777	12.1554	12.1426
ENSG00000070882	8.60727	8.23005	8.67643	8.49688	8.30624	8.3855	8.42963	8.35302	8.70828	8.52968	8.32956	8.56286	8.51814	8.59735	8.52597	8.4812	8.56634	8.63471	8.48751	8.77279	9.25051	9.25776	9.24031
ENSG00000070950	7.10507	6.64887	6.52797	6.86721	6.67942	6.85901	6.9865	6.79067	6.91487	6.65515	6.81823	6.80562	6.85972	6.80988	6.73915	6.80338	6.84927	6.81771	6.79534	6.88474	6.77001	7.02452	7.27339
ENSG00000070961	11.4661	11.1904	11.3689	11.2477	11.2832	11.1885	11.221	11.3538	11.3387	11.2683	11.226	11.45	11.3669	11.5333	11.4012	11.369	11.4423	11.4526	11.36	11.4108	11.2306	11.2395	11.2488
ENSG00000071051	10.168	10.0381	10.135	9.94796	9.64367	9.47994	9.7554	9.93348	9.991	9.74353	9.93797	9.78899	9.92273	9.94887	9.79217	9.95615	9.72293	10.1022	9.93503	9.85402	10.4536	10.4461	10.2717
ENSG00000071054	12.119	11.9443	12.0592	11.9957	11.9587	11.879	11.869	12.0123	12.0134	11.9253	11.9219	12.0013	11.9941	12.055	11.9799	11.9596	11.9754	11.9932	11.9108	11.962	12.2081	12.2488	12.1775
ENSG00000071073	8.66654	8.52871	8.39354	8.58648	8.62543	8.75944	8.67139	8.80148	8.77834	8.55459	8.46504	8.70866	8.58417	8.63262	8.4636	8.55754	8.61163	8.45587	8.48751	8.52072	7.9478	7.96639	8.12296
ENSG00000071082	11.7811	11.753	11.7941	11.6741	11.7536	11.6965	11.7056	11.7614	11.7835	11.7382	11.7488	11.6829	11.702	11.7459	11.8214	11.8069	11.789	11.8187	11.7586	11.7027	12.0083	11.9575	11.9667
ENSG00000071127	12.8986	12.8531	12.8793	12.7697	12.7187	12.7364	12.7267	12.7825	12.7753	12.7353	12.7786	12.82	12.8504	12.8429	12.8851	12.825	12.8511	12.9502	12.8522	12.8166	13.3047	13.3293	13.2562
ENSG00000071189	9.17506	9.22765	9.04096	9.26992	9.1466	9.0764	9.22803	9.11866	9.18139	9.26256	9.00761	9.21279	9.25989	9.20821	9.16387	9.26593	9.31346	9.08707	9.07915	9.22828	9.26622	9.26322	9.31559
ENSG00000071205	4.01664	3.9578	4.62633	3.95122	3.70696	4.18655	4.50405	3.65583	3.63764	3.61661	4.84371	4.28374	4.40599	4.52654	4.39587	4.86585	4.88633	4.65957	4.8051	4.64316	6.24427	6.00981	6.14192
ENSG00000071242	9.9855	9.84259	9.8848	9.89852	9.91394	9.92831	9.90651	9.89564	9.85659	9.87792	9.91744	10.07	9.9137	9.9807	10.2068	9.97018	10.0757	10.1857	10.1394	10.075	10.5082	10.542	10.4955
ENSG00000071243	6.89458	7.14508	6.91131	7.03577	7.02937	7.05844	7.18235	7.06523	6.97577	7.15615	7.19477	7.00191	7.21393	7.03747	7.14325	7.13772	7.28509	6.97782	6.97782	7.05456	6.69979	6.95425	7.02118
ENSG00000071246	4.80048	4.51148	4.21912	4.90382	3.73336	4.9031	4.81321	4.46588	4.30233	4.65201	4.2286	4.28374	4.47314	4.19018	4.541	4.12663	3.44513	4.5319	4.72567	4.88757	5.52621	5.56733	5.84357
ENSG00000071282	8.77823	8.63805	8.70402	8.2857	8.12078	8.11029	8.08244	8.3153	8.48766	8.38437	8.41152	8.39133	8.39369	8.61156	8.42671	8.51987	8.60757	8.6213	8.46017	8.46907	9.52161	9.57117	9.47918
ENSG00000071462	9.60759	9.68801	9.5552	9.67164	9.4989	9.62062	9.62672	9.645	9.45603	9.69673	9.71485	9.60591	9.54767	9.51838	9.51964	9.58693	9.60979	9.69567	9.72771	9.83811	9.81762	9.93038	9.88567
ENSG00000071537	11.9215	11.8533	11.8997	11.867	11.9128	11.9427	11.9444	11.921	11.8993	11.9792	11.8236	11.8987	11.8532	12.0088	11.8955	11.7789	11.8629	11.709	11.686	11.8435	12.0932	12.2236	12.2544
ENSG00000071539	5.50426	5.0752	5.72205	5.32423	5.13614	4.80159	4.57141	4.77469	5.10006	4.74153	4.98568	5.07071	5.33593	4.98526	4.85048	5.28052	4.65416	4.99521	4.88038	5.40999	5.1322	5.33822	5.75685
ENSG00000071553	11.1272	11.1594	11.1961	11.1005	11.1907	11.1391	11.1283	11.1519	11.0361	11.1093	11.2074	11.1509	11.1242	11.1083	11.0444	11.1337	11.0969	11.1079	11.0017	10.9989	11.2014	11.1495	11.1917
ENSG00000071564	9.99048	9.94722	10.0705	10.0161	9.72644	9.72148	9.82433	9.84854	9.91529	9.86054	9.92481	9.84973	9.90308	9.85492	9.74238	10.0894	9.96426	10.0541	9.92729	9.94595	10.1856	10.1348	10.0709
ENSG00000071575	7.67422	7.69325	7.85149	8.07738	7.94367	7.89902	7.9175	7.94718	7.86447	8.13465	7.89217	7.61945	7.90911	7.66037	7.63063	7.63015	7.66694	7.2873	7.37271	7.36829	7.10101	7.01592	7.36068
ENSG00000071626	10.3851	10.3734	10.3732	10.3022	10.2936	10.2278	10.2111	10.2076	10.2969	10.1287	10.3904	10.243	10.2128	10.0875	10.2457	10.3074	10.1557	10.543	10.483	10.4641	10.9389	10.7954	10.8021
ENSG00000071655	10.5982	10.6755	10.7253	10.7212	10.6527	10.5506	10.7114	10.7191	10.7537	10.7222	10.8507	10.6774	10.7029	10.6453	10.5836	10.7334	10.6322	10.7739	10.7475	10.6557	10.6826	10.6276	10.587
ENSG00000071794	9.05663	9.08366	8.94403	9.13164	9.13117	9.21078	9.34091	9.18291	9.17361	9.09009	9.10677	9.14793	9.11236	9.32278	9.29246	9.04771	9.08728	9.12558	8.9098	8.99515	8.69451	8.78271	8.83698
ENSG00000071859	9.56595	9.623	9.70835	9.68184	9.54427	9.67288	9.69815	9.68807	9.74905	9.70232	9.64523	9.71815	9.71651	9.64641	9.70243	9.7471	9.63991	9.94964	9.88564	9.98194	10.4964	10.4445	10.4415
ENSG00000071889	9.74551	9.67096	9.60157	9.69952	9.74852	9.67857	9.74814	9.7653	9.67568	9.75432	9.88308	9.69374	9.80061	9.68557	9.66728	9.75198	9.51761	9.82999	9.71876	9.69129	9.76578	9.70288	9.63613
ENSG00000071894	10.9664	11.0408	10.8529	10.9493	10.9079	10.9051	10.9332	10.8973	10.9468	10.9269	10.9682	10.8767	10.8676	10.8623	10.7968	10.9269	10.8139	10.9468	10.9654	10.9553	10.9981	10.9602	10.887
ENSG00000071994	9.17506	9.15898	9.07892	9.20774	9.21406	9.2723	9.09129	9.26436	9.2861	9.1849	9.17753	9.05665	9.13327	9.27223	9.17225	9.31514	9.28324	9.24931	9.26796	9.25248	9.41451	9.39836	9.29674
ENSG00000072042	11.5306	11.6518	11.5927	11.6274	11.7492	11.8283	11.8294	11.7397	11.7093	11.7443	11.8117	11.7038	11.6982	11.6775	11.6079	11.5374	11.6229	11.5029	11.5004	11.4809	11.5438	11.4725	11.4482
ENSG00000072062	10.6077	10.6485	10.6257	10.5985	10.6282	10.5726	10.6039	10.5908	10.5229	10.6373	10.7284	10.4865	10.5766	10.5202	10.4696	10.5621	10.4816	10.523	10.4617	10.3474	10.4368	10.2419	10.309
ENSG00000072071	9.55926	9.645	9.55183	9.5846	9.4969	9.53745	9.52845	9.56488	9.55913	9.56192	9.54938	9.48857	9.63822	9.4994	9.35515	9.57596	9.35036	9.5218	9.45196	9.34953	9.32071	9.3615	9.33398
ENSG00000072110	11.4744	11.424	11.4627	11.2041	11.1901	11.1225	11.1614	11.3023	11.2759	11.1639	11.2266	11.302	11.222	11.3876	11.2765	11.2202	11.3061	11.2397	11.1493	11.2013	11.8063	11.8377	11.7956
ENSG00000072121	10.2422	10.2074	10.2	10.1415	10.203	10.2936	10.2604	10.2767	10.2159	10.2015	10.099	10.2287	10.2103	10.1976	10.0848	10.1609	10.1751	10.2637	10.1036	10.1436	10.3802	10.3998	10.3346
ENSG00000072133	7.80807	7.71837	7.72553	7.85202	7.94954	7.97499	7.99927	7.98372	7.52466	7.51465	8.13501	7.76352	7.6725	7.62578	7.94948	7.8032	7.64334	7.96785	7.5271	7.79719	7.4938	7.62003	7.47129
ENSG00000072134	7.79295	8.18271	8.02194	7.91391	8.10507	8.12703	7.98699	7.89699	7.84502	8.06699	8.19472	8.09707	8.01993	8.04249	8.06801	8.05043	8.13575	8.20209	8.14614	8.14628	8.26856	7.96192	8.14068
ENSG00000072135	9.16041	9.16508	9.20871	9.09011	9.39291	9.29471	9.34573	9.1724	9.20193	9.19286	9.27756	9.0858	9.23592	9.14854	9.24557	9.40259	9.31595	9.3224	9.4097	9.40752	9.57302	9.48345	9.46236
ENSG00000072163	5.92063	6.10533	5.98452	5.80681	5.78829	5.93617	6.06948	5.77613	5.96332	5.84123	6.02983	6.04909	5.44029	5.58408	5.54453	5.54338	5.59274	5.63075	4.98642	5.47128	6.35285	6.04404	5.91354
ENSG00000072182	2.17132	1.14507	2.6476	1.2909	2.32758	2.40658	2.41636	1.63684	2.63293	2.07686	0.992626	2.68585	1.59455	1.95448	1.69063	2.9629	2.92492	1.97903	2.64189	0.943067	1.68796	1.73155	0.756398
ENSG00000072195	6.17504	6.00003	5.85925	5.27117	5.21632	5.00857	4.57141	5.32309	5.05561	5.18618	5.15555	5.50981	5.22342	5.39983	5.28079	4.6031	5.45494	5.69361	5.39859	5.53007	6.97926	6.96323	7.08116
ENSG00000072201	7.24496	7.35182	7.38272	7.51805	7.3108	7.34279	7.36429	7.58452	7.18625	7.21984	7.23324	7.31913	7.15381	7.53921	7.28396	7.20573	7.19057	7.55332	7.26446	7.4236	7.48785	7.46443	7.54236
ENSG00000072210	12.6242	12.5573	12.5897	12.6153	12.5967	12.5477	12.5821	12.6355	12.7057	12.6655	12.6313	12.7455	12.7497	12.7927	12.8292	12.8205	12.8752	12.807	12.8631	12.8158	11.7513	11.5862	11.5551
ENSG00000072274	9.38622	9.34518	9.46848	9.54324	9.55008	9.51854	9.4898	9.62393	9.64038	9.65702	9.44056	9.54003	9.63089	9.58291	9.8012	9.49479	9.65965	9.77169	9.80582	9.9035	10.2711	10.252	10.3912
ENSG00000072310	11.5789	11.5575	11.5175	11.6652	11.6482	11.6763	11.6973	11.5765	11.5487	11.6376	11.7792	11.4639	11.4163	11.3102	10.946	11.0529	10.9707	10.5865	10.7095	10.5581	10.0928	10.0105	9.89092
ENSG00000072364	11.2409	10.9106	11.1428	11.1371	10.9562	10.9379	10.9041	11.0458	11.0467	10.9784	10.877	11.1584	11.1436	11.2034	11.1164	11.0443	11.0911	11.09	11.0791	11.2209	11.4645	11.7354	11.6797
ENSG00000072401	8.9345	8.90559	8.80373	8.77458	8.67593	8.7378	8.77503	8.7172	8.93377	8.83439	8.75012	8.72357	8.75916	9.00787	8.8207	8.85243	8.86047	8.80572	8.72558	8.71061	8.93181	8.83008	8.81948
ENSG00000072415	9.41119	9.34518	9.3895	9.44184	9.6291	9.51005	9.46122	9.44335	9.43883	9.31089	9.46905	9.47762	9.43219	9.52402	9.57968	9.40879	9.40985	9.36969	9.25033	9.3718	9.26274	9.40825	9.41362
ENSG00000072422	9.27637	9.08366	9.27766	9.22529	9.02107	9.11888	9.02676	9.19854	9.11255	9.09435	9.13499	9.20749	9.16915	9.35903	9.18059	9.18159	9.25756	9.29056	9.19057	9.24811	9.90715	9.97098	10.0105
ENSG00000072501	9.65852	9.67096	9.54506	9.55161	9.53061	9.57862	9.47668	9.5426	9.56707	9.47323	9.52633	9.69563	9.57467	9.56111	9.58388	9.34345	9.54121	9.56307	9.41287	9.50966	9.71837	9.79496	9.72811
ENSG00000072506	8.61589	8.78793	8.63243	8.61338	8.71095	8.7983	8.82419	8.75291	8.66456	8.573	8.70976	8.65521	8.71129	8.69401	8.67889	8.51987	8.6437	8.55795	8.56086	8.30621	8.64999	8.47923	8.42155
ENSG00000072518	9.83679	9.80205	9.87269	9.69701	9.67948	9.74517	9.74814	9.75477	9.81386	9.78096	9.78936	9.68424	9.78913	9.80323	9.63126	9.64582	9.67718	9.81475	9.80219	9.67835	9.91713	9.87678	9.87618
ENSG00000072571	5.12414	4.65714	5.33974	4.97191	4.8648	5.35032	5.63822	5.63013	5.18505	5.05263	4.44532	5.20431	5.22342	5.84691	5.36119	4.12984	4.45167	4.57305	4.84323	4.47379	4.5826	4.40013	4.65102
ENSG00000072609	9.31392	9.34787	9.44324	9.48343	9.29707	9.39952	9.42299	9.37164	9.33805	9.18888	9.30509	9.43294	9.41735	9.26551	9.2053	9.28626	9.33326	9.50437	9.5373	9.45197	9.51286	9.60739	9.61351
ENSG00000072682	10.1354	10.0431	10.1146	10.0597	10.0691	10.0088	10.16	10.1064	10.0144	10.0608	10.0432	10.1754	10.0574	10.1774	10.1738	10.1755	10.086	10.337	10.2105	10.226	10.8073	10.8436	10.7476
ENSG00000072736	9.55449	9.42615	9.50086	9.39244	9.75217	9.60383	9.56865	9.48712	9.59315	9.67227	9.68362	9.62855	9.56983	9.64597	9.6039	9.39215	9.60285	9.55448	9.53693	9.55752	9.41396	9.43424	9.56342
ENSG00000072756	7.96469	7.75928	7.65189	7.62765	7.77521	7.66676	7.65566	7.79103	7.76446	7.75933	7.83703	7.7121	7.80219	7.77214	7.90993	7.90021	7.843	7.85321	7.79371	7.95034	7.97354	8.02755	7.77806
ENSG00000072778	12.1171	12.1383	12.1402	12.1685	12.181	12.1484	12.2059	12.2202	12.1744	12.2221	12.2497	12.1866	12.1793	12.1399	12.1819	12.2653	12.2084	12.2544	12.2974	12.2916	12.3977	12.2906	12.3422
ENSG00000072786	8.59861	8.38448	8.44167	8.30563	7.97857	8.09901	7.9495	8.01347	8.2321	8.20715	8.15017	8.09133	8.25748	8.27902	8.23733	8.07142	7.98119	8.27926	8.22769	8.15565	9.35048	9.44714	9.28084
ENSG00000072803	10.1665	10.1283	10.1618	10.1078	10.0825	10.0342	10.0344	10.116	10.046	10.1078	10.0687	10.2234	10.1137	10.2198	10.1945	10.0477	10.1432	10.0167	9.98599	10.0551	10.2563	10.3033	10.2837
ENSG00000072818	2.77413	3.24503	2.17339	2.41696	3.00618	3.09234	2.9083	2.87372	2.36801	2.89487	2.57265	2.91102	2.59694	1.95448	1.69063	2.28804	1.67722	2.78337	3.20736	2.22973	2.6287	2.28335	1.61721
ENSG00000072840	9.36593	9.42108	9.47205	9.53482	9.43959	9.37636	9.54739	9.35779	9.2909	9.5711	9.43645	9.50377	9.33175	9.35481	9.29758	9.36272	9.24455	9.37609	9.32297	9.28272	8.60404	8.57891	8.50876
ENSG00000072849	9.43816	9.41598	9.39515	9.3899	9.51484	9.56229	9.62276	9.38536	9.57693	9.55884	9.51271	9.42156	9.45728	9.46654	9.43626	9.41291	9.57902	9.47931	9.40174	9.48758	9.39083	9.41807	9.48196
ENSG00000072864	6.52534	6.96092	6.82459	6.84922	6.67942	6.53014	6.50808	6.66132	6.95172	6.74448	6.72682	6.6736	6.42358	6.70774	6.61348	6.68585	6.57771	6.84566	6.77576	6.90709	7.55189	7.78599	7.52086
ENSG00000072952	5.64562	5.91568	4.98731	5.76903	5.83983	5.80355	5.72951	6.09835	5.93906	5.57513	5.84345	5.81846	5.65793	5.55496	5.76742	5.79116	5.88874	5.09173	5.31964	5.58656	4.28664	4.10818	3.8861
ENSG00000072954	7.22257	7.56066	7.38272	6.97069	7.37334	7.69699	7.29623	7.58452	7.07931	7.08951	7.31622	7.30928	7.20408	7.47847	7.08526	7.13772	7.42083	7.2319	7.44888	7.17919	7.62949	7.46443	7.31145
ENSG00000072958	10.575	10.643	10.6409	10.641	10.7619	10.649	10.7409	10.6695	10.7236	10.6945	10.6909	10.62	10.7329	10.6229	10.6987	10.6264	10.641	10.7037	10.5899	10.5955	10.4949	10.4022	10.4712
ENSG00000073008	11.8076	11.7944	11.8225	11.7323	11.7203	11.6479	11.7661	11.7058	11.7504	11.7104	11.7575	11.7617	11.7725	11.7531	11.6846	11.7048	11.7034	11.8113	11.8554	11.7641	12.1111	12.0817	12.0469
ENSG00000073050	7.81557	7.88291	8.06513	7.98154	7.6865	7.49677	7.80306	7.80471	7.85153	7.8623	7.78618	7.78501	7.6725	7.71458	7.82743	7.96331	7.89721	7.98889	8.1075	7.7423	8.14188	8.04877	7.96875
ENSG00000073060	11.8457	11.9252	11.9288	12.0231	12.0294	12.0719	12.0485	11.9863	11.9676	11.9913	12.0967	11.8596	11.8437	11.9305	11.785	11.8321	11.7756	11.7732	11.7143	11.6408	10.7118	10.5443	10.5315
ENSG00000073067	3.90857	3.84069	3.52763	3.27513	2.32758	2.40658	2.0887	3.39154	3.22103	3.41368	4.07355	3.43059	3.59813	3.40407	1.07996	3.28375	2.92492	3.06276	2.80535	2.89884	0.799644	0.826693	0.756398
ENSG00000073111	7.38261	7.04274	7.44218	7.25659	7.21646	7.13771	7.1049	7.00726	7.2269	7.13977	7.18499	7.09661	7.17413	7.14885	7.41215	6.94654	6.80741	7.26678	7.15502	7.1607	7.36359	7.23178	7.34853
ENSG00000073150	6.37101	6.66619	6.595	6.13846	6.31075	6.37053	6.57525	6.26594	6.58032	6.60832	6.41165	6.57836	6.70072	6.882	6.93575	6.98022	6.87651	6.97782	7.1701	7.13252	8.52792	8.46666	8.4099
ENSG00000073169	9.38874	9.55491	9.37241	9.5682	9.47057	9.38102	9.49414	9.35314	9.4453	9.6043	9.55319	9.41008	9.41735	9.43891	9.34777	9.38175	9.32833	9.39198	9.47339	9.36172	8.51337	8.27099	8.20948
ENSG00000073331	6.28718	6.87418	6.95279	6.50307	6.92586	6.67385	6.02212	6.67628	6.72924	6.50984	6.61472	6.71897	6.68664	6.66749	6.76893	6.61616	6.68947	6.66921	6.90757	6.91814	7.51732	7.5503	7.49904
ENSG00000073350	10.7299	10.8294	10.761	10.7673	10.6662	10.7623	10.8035	10.7255	10.8288	10.8011	10.8755	10.764	10.7867	10.6601	10.6445	10.7601	10.6946	10.8529	10.9064	10.8094	10.5812	10.4341	10.3749
ENSG00000073417	9.45747	9.58253	9.50205	9.41763	9.40151	9.67098	9.55365	9.50748	9.38371	9.46668	9.55319	9.42384	9.52213	9.4587	9.50865	9.64232	9.73601	9.59085	9.67185	9.74966	9.67327	9.66351	9.74906
ENSG00000073464	8.49498	8.25887	8.20043	8.16726	8.14659	8.03538	7.89137	8.08808	8.27635	8.13465	7.95106	8.20728	8.17418	8.21995	8.21587	8.03449	8.14699	8.05023	8.14614	7.98227	8.74769	8.66941	8.81065
ENSG00000073536	7.69876	7.60622	7.52701	7.47176	7.41641	7.50534	7.60029	7.53614	7.59623	7.17233	7.52445	7.4324	7.363	7.75944	7.93642	7.66508	7.43922	7.76814	7.79371	7.78517	7.98201	7.879	7.78709
ENSG00000073578	11.3082	11.3969	11.3971	11.392	11.492	11.5529	11.5489	11.4611	11.445	11.5177	11.505	11.5009	11.4749	11.4245	11.4463	11.4034	11.3983	11.3973	11.3121	11.3001	11.0752	11.0511	11.0469
ENSG00000073584	10.7109	10.6933	10.7182	10.7035	10.6591	10.7979	10.7454	10.6753	10.7526	10.6931	10.6823	10.7724	10.7613	10.8361	10.7593	10.7385	10.7417	10.7608	10.663	10.7549	10.6163	10.53	10.5153
ENSG00000073605	9.08793	9.22473	9.20657	9.36162	9.38859	9.44252	9.43207	9.28647	9.20448	9.4927	9.36894	9.19685	9.13067	8.93346	9.21615	9.23371	9.16392	9.013	9.35136	9.26768	8.80376	8.58474	8.67855
ENSG00000073614	9.85329	9.74819	9.73386	9.6142	9.7686	9.64214	9.6906	9.74947	9.75427	9.59532	9.69948	9.76215	9.7303	9.78767	9.72539	9.73893	9.70405	9.57703	9.65721	9.64049	9.57442	9.70556	9.63363
ENSG00000073670	4.46115	4.34944	4.40512	4.90382	4.65063	4.55988	4.43339	4.16018	4.57849	3.61661	4.50942	4.01942	4.5373	3.40407	3.84477	4.04751	4.37733	3.58899	3.92855	4.13808	1.98648	1.73155	2.15262
ENSG00000073711	7.92363	7.91223	8.07456	8.05401	7.87121	7.98727	7.92395	7.97769	7.97003	7.6595	7.79264	7.7921	7.87848	7.86997	8.04993	7.71261	7.51052	7.69321	7.75423	7.90663	7.87684	7.93024	7.86594
ENSG00000073712	10.4335	10.5293	10.4594	10.2517	10.3657	10.4854	10.335	10.4013	10.33	10.3933	10.3094	10.5242	10.3598	10.4733	10.3988	10.3669	10.365	10.2749	10.2322	10.2092	10.2029	10.305	10.3308
ENSG00000073734	10.4708	10.6132	10.6209	10.7887	10.9117	10.9808	11.0164	10.7845	10.8055	10.9185	10.8793	11.0256	11.0179	10.8519	11.0535	10.9716	11.0127	10.9623	11.055	11.086	9.56599	9.50204	9.593
ENSG00000073792	11.1607	11.249	11.2297	11.1908	11.1498	11.1945	11.2655	11.1876	11.1619	11.2341	11.229	11.2501	11.251	11.16	11.2497	11.222	11.286	11.2322	11.2203	11.335	11.1832	11.2199	11.1959
ENSG00000073803	9.05979	8.94514	8.85111	9.04736	9.0892	9.2823	9.22542	9.10214	9.00854	9.11543	9.02964	9.06545	8.96852	8.98622	8.9883	9.02369	9.04589	8.98186	9.06106	8.98205	8.91419	9.01402	8.90079
ENSG00000073849	11.8328	11.9216	11.8675	12.0738	12.177	12.2921	12.2249	12.1277	12.1405	12.1887	12.2143	12.0447	12.0175	12.0061	11.8925	11.8221	11.8844	11.6319	11.5453	11.5851	10.7833	10.7954	10.8319
ENSG00000073910	7.68244	7.54202	7.62648	7.70971	7.82721	7.81193	7.68636	7.70612	7.64204	7.74857	7.71999	7.30928	7.39798	7.791	7.54717	7.37562	7.24384	7.26678	7.22889	7.36829	7.00445	6.69892	6.60729
ENSG00000073921	11.1855	11.2038	11.1321	11.1746	11.2141	11.2509	11.2431	11.1632	11.291	11.2523	11.11	11.1903	11.2079	11.2348	11.2177	11.2237	11.2097	11.1402	11.1039	11.1353	11.3161	11.4698	11.3758
ENSG00000073969	9.5125	9.70424	9.61894	9.64935	9.77021	9.83817	9.81322	9.77629	9.70247	9.72719	9.6794	9.66237	9.69162	9.8304	9.63486	9.59358	9.77804	9.61875	9.57289	9.61351	9.68792	9.6025	9.7516
ENSG00000074054	10.5661	10.5222	10.4612	10.5282	10.4828	10.5948	10.4833	10.5538	10.5034	10.4949	10.5147	10.4843	10.5506	10.4228	10.5285	10.4732	10.5199	10.4206	10.4532	10.5132	10.3403	10.2729	10.2741
ENSG00000074071	9.39876	9.49319	9.44506	9.57916	9.53648	9.46685	9.5114	9.63163	9.45817	9.57415	9.66823	9.3798	9.49412	9.48016	9.53272	9.54816	9.48921	9.59909	9.53585	9.40948	9.77435	9.5204	9.62105
ENSG00000074181	5.71142	5.17534	5.20891	5.1588	5.17679	4.95954	4.63576	5.16239	4.51424	5.36584	4.93989	4.81624	5.05832	5.02828	5.57856	5.24403	5.68808	5.37352	5.20717	5.614	6.2583	6.5159	6.11348
ENSG00000074201	9.48595	9.48102	9.42125	9.44783	9.41644	9.53536	9.60277	9.48217	9.40158	9.48947	9.39038	9.50593	9.46142	9.55745	9.55639	9.45543	9.51545	9.48673	9.51238	9.49682	9.71201	9.59156	9.76286
ENSG00000074211	3.5252	4.16687	4.51996	3.47608	4.00662	3.68155	4.3591	3.23869	3.05032	3.79447	3.98614	3.69556	3.82069	3.26713	3.13716	4.04751	3.44513	4.52777	4.30156	3.69977	5.33112	5.76499	5.79317
ENSG00000074219	9.53902	9.51963	9.52286	9.44484	9.35578	9.15471	9.16674	9.24944	9.44315	9.2701	9.46502	9.45545	9.47377	9.44686	9.40341	9.43331	9.4145	9.70968	9.66255	9.77267	10.3329	10.1575	10.0438
ENSG00000074266	7.77768	7.71004	7.92106	7.80612	7.96703	7.85278	7.66339	7.60812	7.93365	7.85269	7.88614	7.52896	7.78248	7.93922	7.86238	7.65817	7.90385	7.81602	7.90155	8.01865	7.68766	7.81105	7.746
ENSG00000074276	5.89254	6.05364	5.62275	5.73024	5.91383	6.14791	5.99784	5.74809	6.05649	5.80015	5.9162	5.50981	6.05853	5.87074	5.6443	5.91241	5.30257	5.65201	5.69814	4.84189	6.85554	6.2633	6.58675
ENSG00000074319	9.84781	9.77038	9.74127	9.73914	9.86192	9.87147	9.70192	9.68622	9.79201	9.75701	9.8401	9.76936	9.70434	9.80168	9.90543	9.69058	9.87082	9.7509	9.75921	9.68483	10.0154	10.0552	9.96443
ENSG00000074356	10.0959	10.0547	10.0551	10.0181	10.1325	10.1245	10.1198	10.0601	10.0474	10.1183	10.135	10.0874	10.0978	10.0747	9.95485	10.1585	10.0801	10.0887	10.25	10.2436	9.75716	9.9429	9.85164
ENSG00000074410	8.50893	8.78	8.66399	8.91091	8.93482	9.16015	9.01168	8.79806	8.84188	8.86956	8.87703	9.02689	8.98011	9.01858	9.11833	9.19838	9.28069	9.56587	9.53439	9.45949	10.8037	10.8178	10.7717
ENSG00000074416	9.94504	9.56418	9.65909	9.41763	9.19934	9.00269	9.03871	9.44553	9.4345	9.36118	9.32953	9.42612	9.36748	9.50702	9.27959	9.29521	9.37922	9.71094	9.55608	9.55814	12.1333	12.2725	12.1429
ENSG00000074527	9.39876	9.27356	9.3179	9.31322	9.07314	8.85301	9.01168	9.04566	9.13408	9.18888	8.88006	9.18072	9.16408	9.37578	9.03193	9.27047	9.23142	9.1026	9.0304	9.15779	9.85502	10.0105	9.7867
ENSG00000074582	8.59425	8.63805	8.48473	8.5973	8.64729	8.55598	8.63643	8.59657	8.49184	8.4119	8.65768	8.45528	8.43638	8.5316	8.70993	8.54259	8.82245	8.62668	8.52612	8.74514	8.53945	8.38555	8.4099
ENSG00000074590	8.43781	8.33662	8.66399	8.31876	8.31538	8.28462	8.30654	8.4212	8.34721	8.27619	8.22844	8.43729	8.37186	8.52411	8.03775	8.00753	8.02446	7.93354	7.75423	7.99276	7.60774	7.47701	7.75983
ENSG00000074603	8.92066	9.03784	9.12274	9.05914	9.19934	9.01474	9.03275	9.00772	9.02593	8.87945	8.87703	9.12283	8.96269	9.1679	9.10672	9.03708	9.1556	8.95645	8.98635	8.93931	8.79416	9.08356	8.85856
ENSG00000074621	7.16502	7.28614	7.17935	7.38701	7.3108	7.55569	7.20374	7.48609	7.46643	7.42292	7.2521	7.51187	7.46549	7.4939	7.52116	7.61594	7.46637	7.45393	7.52123	7.3357	7.23473	7.16335	7.0135
ENSG00000074657	9.55239	9.43357	9.41938	9.41148	9.39711	9.44475	9.4523	9.42569	9.33094	9.38909	9.29353	9.31721	9.38922	9.28317	9.42452	9.31733	9.36964	9.47017	9.53139	9.55632	9.85262	9.84543	9.75824
ENSG00000074660	5.38834	5.85658	5.81495	5.51888	6.11548	5.83106	6.36355	5.83064	5.2653	5.52558	5.86811	5.60953	5.62877	5.22598	6.3236	5.73966	5.88874	5.90318	6.11143	5.71881	5.61893	5.25299	5.14826
ENSG00000074695	10.8268	10.8914	10.8679	10.9951	11.063	11.0276	11.072	10.9787	10.9392	11.0709	10.951	10.9475	11.0263	11.0258	10.9395	10.9505	10.9699	10.8808	10.8991	10.958	11.4219	11.5036	11.5689
ENSG00000074696	11.681	11.7098	11.6534	11.7145	11.8172	11.8624	11.7627	11.805	11.7874	11.7591	11.8018	11.7873	11.7771	11.8121	11.7713	11.7212	11.7701	11.7232	11.6481	11.7064	11.2487	11.261	11.2422
ENSG00000074706	4.46115	4.16687	4.14375	4.40975	3.59143	4.09871	4.01647	3.44002	3.96051	3.79447	4.44532	4.50706	3.59813	4.94093	4.31097	3.76795	4.65416	4.16335	4.12707	4.41261	3.4099	3.74177	3.31621
ENSG00000074755	10.1753	10.2162	10.1529	10.0637	10.1543	10.1643	10.1463	10.1364	10.0962	10.1676	10.2056	10.2142	10.1615	10.1618	10.0744	10.1022	10.0535	10.2128	10.1604	10.2215	10.3486	10.3965	10.3823
ENSG00000074800	13.1874	13.179	13.181	13.1149	13.1961	13.2359	13.1947	13.2014	13.2224	13.2264	13.1968	13.2678	13.2373	13.272	13.3607	13.3263	13.3494	13.5779	13.4882	13.4456	13.95	13.9133	13.87
ENSG00000074842	9.79946	9.68801	9.80636	9.79424	9.85254	9.58267	9.83807	9.85349	9.85172	9.62797	9.74678	9.74945	9.68853	9.78454	9.97893	9.80931	9.66356	9.81593	9.77533	9.67835	10.6386	10.6072	10.6377
ENSG00000074855	8.3984	8.50965	8.38977	8.38893	8.10507	8.21843	8.33104	8.29606	8.47927	8.21499	8.44878	8.31461	8.21398	8.03197	8.22664	8.34566	8.20187	8.44373	8.54937	8.49881	8.87831	9.02049	8.78157
ENSG00000074935	7.81557	7.81467	8.07925	8.15998	7.83992	7.85948	8.00537	7.87122	7.79857	7.74857	7.90414	7.99011	7.83447	8.13886	8.17197	8.23843	8.27023	8.03817	8.52319	8.31041	7.60226	7.79607	7.69412
ENSG00000074964	10.5278	10.7134	10.5407	10.7322	10.6936	10.7668	10.8235	10.6507	10.6785	10.7263	10.7165	10.6486	10.6743	10.4259	10.482	10.564	10.3541	10.4043	10.4594	10.3392	9.97242	9.93836	9.91687
ENSG00000074966	3.90857	3.41853	2.42989	4.30805	2.32758	3.55525	3.69266	3.06772	3.22103	3.41368	3.6868	3.69556	3.59813	3.64421	2.44783	3.86728	3.11992	3.49799	3.20736	3.97836	3.84118	4.40013	4.29353
ENSG00000075089	7.62384	7.15738	7.48522	7.28363	7.45823	7.36178	7.47397	7.46039	7.67179	7.42292	7.501	7.35788	7.29967	7.67398	7.67849	7.67882	7.3928	7.42335	7.43021	7.56387	7.52893	7.38653	7.61009
ENSG00000075131	4.91662	4.72481	4.62633	4.75716	4.46617	4.49254	4.57141	5.32309	4.37648	4.82581	4.98568	4.87085	5.14323	5.33278	5.00861	4.86585	5.13219	5.09173	4.64161	4.69547	5.06994	5.19323	5.20328
ENSG00000075142	9.78997	9.61856	9.68854	9.51213	9.58259	9.52697	9.62672	9.7209	9.61954	9.71065	9.70291	9.57541	9.61611	9.6906	9.73296	9.69228	9.74712	9.56307	9.54745	9.59819	9.80692	9.82604	9.88252
ENSG00000075151	10.3338	10.2438	10.2611	10.351	10.3154	10.2923	10.2527	10.2902	10.2656	10.3967	10.2844	10.355	10.2335	10.3075	10.3117	10.3477	10.3626	10.485	10.426	10.4986	10.4964	10.5599	10.5733
ENSG00000075188	7.22257	7.52314	7.35978	7.44805	7.45823	7.65911	7.52583	7.44301	7.48331	7.63635	7.30724	7.75629	7.4489	7.66719	7.65476	7.67882	7.47531	7.44178	7.33975	7.50646	7.10101	7.17112	7.28619
ENSG00000075218	5.34753	4.26104	4.86228	4.75716	4.59173	4.26934	4.11005	4.46588	5.22573	3.61661	4.30789	4.70039	4.65764	4.74856	4.60844	4.65962	4.45167	4.16335	4.55235	4.13808	3.07154	3.89967	3.50322
ENSG00000075223	6.12762	5.91568	6.11813	5.73024	6.07304	5.62641	6.04599	5.93383	5.86372	6.06581	5.9162	6.20601	5.76898	5.91725	6.26211	5.79116	5.2199	5.3989	5.7986	6.17075	6.2583	6.47884	6.51245
ENSG00000075234	10.8015	10.9562	10.878	11.0284	11.0978	11.1295	11.1858	11.1071	11.0064	11.0338	11.1658	11.0263	11.0002	10.8852	10.863	10.8956	10.8969	10.8649	10.7947	10.8087	10.1709	10.0802	10.2317
ENSG00000075239	9.51848	9.81181	9.59667	9.73179	9.97284	10.0401	9.94828	9.84689	9.85497	9.86553	9.91153	9.8066	9.78583	9.83235	9.77209	9.86145	9.85892	9.60046	9.69028	9.56342	9.44702	9.40166	9.38416
ENSG00000075240	9.00836	9.20709	9.1318	9.18998	9.29014	9.06775	9.31658	9.18291	9.14738	9.18888	9.22364	9.04482	9.23592	8.96424	9.0009	9.21498	9.1913	9.16493	9.27146	9.20366	9.06146	8.97463	8.81728
ENSG00000075275	9.26546	9.4057	9.51941	9.36162	9.11295	9.13	9.18567	9.25692	9.1684	9.24736	9.16763	9.38215	9.30205	9.29882	9.42228	9.47328	9.37445	9.60182	9.55321	9.45571	10.381	10.5391	10.4278
ENSG00000075292	10.6794	10.6945	10.599	10.6553	10.7213	10.888	10.729	10.6507	10.8542	10.7291	10.7199	10.7136	10.7634	10.672	10.715	10.7116	10.7277	10.6806	10.7256	10.8109	10.4521	10.4437	10.4364
ENSG00000075303	7.8525	7.96215	8.01706	8.27226	8.23104	8.1815	8.20945	8.09366	8.29559	8.20715	8.20443	8.03863	7.91516	7.95045	7.96885	8.03983	7.87712	7.86236	7.97208	7.93953	7.35709	7.20933	7.30518
ENSG00000075336	7.75445	8.0036	7.92628	7.81542	7.84623	7.88596	7.95581	8.00164	7.976	7.90206	7.9909	7.92063	8.04221	7.95603	7.96243	7.88251	7.86357	8.10522	8.24203	8.10337	8.14942	8.05298	8.19598
ENSG00000075391	9.48124	9.23056	9.32778	9.2733	9.25497	8.98136	8.99951	9.16976	9.29807	9.1849	9.09377	9.11437	9.25751	9.15825	8.9883	9.05563	9.06969	8.99855	8.88717	8.99254	8.82512	8.77254	8.82826
ENSG00000075399	8.87473	9.05108	8.86204	8.99104	8.86191	8.87961	8.99951	8.93185	8.93683	8.97021	8.93653	8.92088	8.90914	8.72376	8.7478	9.03174	8.80483	8.84317	8.8026	8.92568	8.57911	8.65009	8.52235
ENSG00000075407	8.43956	8.25172	8.30998	8.31385	8.25297	8.31075	8.42972	8.3857	8.44943	8.42979	8.44256	8.50118	8.19387	8.40338	8.50904	8.36801	8.49179	8.40596	8.62024	8.49742	8.46072	8.69568	8.65888
ENSG00000075413	10.1927	10.1361	10.1157	10.2012	10.2407	10.1176	10.1831	10.1552	10.026	10.1636	10.2579	10.197	10.1137	10.1917	10.2536	10.1548	10.1502	10.1701	10.3269	10.3268	10.1285	10.2738	10.2375
ENSG00000075415	12.8173	12.8362	12.8257	12.8477	12.9496	12.9352	12.971	12.8807	12.9229	12.9186	12.9652	12.878	12.8681	12.8754	12.9342	12.9099	12.9178	12.8754	12.8136	12.8503	12.7172	12.6499	12.6928
ENSG00000075420	11.134	10.9702	11.0195	11.0314	10.8604	10.9528	10.7912	10.8796	10.9822	10.8384	10.9285	11.0044	10.9916	11.0875	10.9702	10.9066	10.8624	10.9163	10.8218	10.9138	11.2346	11.308	11.295
ENSG00000075426	9.76307	9.54793	9.80353	9.50353	9.53648	9.29718	9.37666	9.54668	9.54312	9.43349	9.56266	9.62788	9.56893	9.52214	9.54997	9.5064	9.51761	9.57842	9.3497	9.45571	9.83878	9.96429	9.92508
ENSG00000075461	4.7387	4.8513	3.82432	4.50476	4.00662	4.00518	3.10297	3.06772	3.75348	3.79447	3.8931	4.36209	4.01346	4.40124	4.60844	3.86728	4.12811	4.81845	3.31982	4.47379	5.43357	4.64282	5.14826
ENSG00000075539	8.95162	8.81147	8.94916	8.85792	8.96705	9.06195	8.95291	8.96877	8.98799	8.87945	8.91894	8.91115	9.00868	8.99167	9.02578	8.98274	9.06673	8.84548	8.93651	8.85558	8.98339	9.06075	9.0433
ENSG00000075568	10.575	10.5884	10.4458	10.6371	10.6227	10.6256	10.6533	10.5729	10.6148	10.6344	10.6273	10.5548	10.5889	10.5937	10.7141	10.5453	10.5853	10.6131	10.5566	10.5241	10.8467	10.9025	10.9011
ENSG00000075618	9.60109	9.04448	9.49329	9.14276	8.80794	8.33834	8.41136	8.8811	8.7646	8.69006	8.73679	8.88153	8.85353	9.01056	8.7956	8.95478	8.9206	9.11604	8.88488	8.82656	10.9268	10.9181	10.899
ENSG00000075624	16.3411	16.295	16.3328	16.2374	16.246	16.2467	16.2389	16.2535	16.1987	16.219	16.2531	16.2717	16.2533	16.2514	16.226	16.2391	16.2729	16.2786	16.16	16.1409	16.2714	16.1766	16.1013
ENSG00000075643	8.4475	8.72323	8.52996	8.67596	8.86813	8.92182	8.81032	8.74938	8.64968	8.95626	8.8118	8.90788	8.85353	8.846	8.97558	9.02369	8.89751	9.00683	9.00118	8.81773	9.48181	9.60165	9.66336
ENSG00000075651	9.0018	8.82309	9.08126	8.70125	8.84939	8.74866	8.77503	8.82516	8.91212	8.9039	8.77641	9.0057	8.75579	8.8728	8.89009	8.67187	9.0902	8.89536	8.77327	8.95011	9.56881	9.46304	9.47499
ENSG00000075702	6.37101	6.31744	6.18927	6.04672	5.32881	5.49496	5.54075	6.07597	5.78423	6.10007	5.65793	5.7028	5.47346	6.04841	5.43734	5.95819	5.992	6.02225	6.0145	5.614	6.03207	5.97474	6.2504
ENSG00000075711	10.2928	10.3346	10.2621	10.4363	10.4207	10.4559	10.3838	10.3579	10.5157	10.2839	10.4251	10.3869	10.2396	10.3851	10.3964	10.4262	10.2834	10.2698	10.3708	10.4404	10.0651	10.1288	10.0737
ENSG00000075785	11.4139	11.4022	11.4634	11.532	11.449	11.4071	11.4575	11.4801	11.4438	11.4952	11.493	11.4947	11.483	11.5017	11.5121	11.5188	11.5069	11.5535	11.5449	11.5358	12.0172	12.0817	12.0494
ENSG00000075790	8.30877	8.4104	8.58046	8.57558	8.66882	8.46669	8.50478	8.52401	8.60523	8.34207	8.44288	8.5036	8.47375	8.7593	8.44066	8.65111	8.79415	8.56357	8.56455	8.612	8.67895	8.81281	8.81065
ENSG00000075826	7.96604	8.22947	8.19525	8.01944	8.04951	7.94281	8.11666	7.98486	7.96883	8.15695	8.00392	7.81874	7.99312	7.96408	7.86927	7.90191	7.95222	7.7242	7.89766	7.95796	6.53177	6.62169	6.62855
ENSG00000075856	9.6162	9.63184	9.67001	9.72687	9.61253	9.49722	9.62474	9.65447	9.6385	9.70232	9.54557	9.54214	9.69558	9.72695	9.68691	9.65627	9.62392	9.71347	9.66522	9.61186	9.63347	9.58431	9.62986
ENSG00000075914	8.09982	8.31483	8.25947	8.27226	8.26442	8.3855	8.25113	8.32956	8.35181	8.25354	8.28904	8.05641	8.26697	8.24296	8.34505	8.11754	8.34039	8.50927	8.41023	8.37197	8.53081	8.34494	8.54116
ENSG00000075945	8.69934	8.7024	8.74	8.62928	8.72814	8.80178	8.85831	8.73517	8.79871	8.71237	8.63989	8.97486	8.70082	8.88455	8.83485	8.81248	8.87743	8.87742	8.89853	8.79694	8.77965	8.74679	8.83481
ENSG00000075975	8.9276	9.03118	8.87288	8.87135	8.97283	8.87631	9.02075	8.90352	9.0374	8.94216	8.92776	8.95604	8.96561	9.08375	9.1241	8.94912	9.11328	8.98186	8.92099	8.98468	8.84849	8.95002	8.93166
ENSG00000076003	7.35199	6.93259	7.42017	7.11319	7.19684	7.02308	7.07039	6.85782	7.2269	7.20417	6.6858	7.02617	7.18418	7.234	7.25268	7.27067	7.06593	7.29408	7.37271	7.57787	7.52314	7.508	7.32392
ENSG00000076043	9.1125	9.20709	9.27766	9.24606	9.25022	9.12161	9.28933	9.14846	9.2594	9.14854	9.20675	9.30244	9.15899	9.25423	9.31786	9.20076	9.39815	9.40142	9.35961	9.40548	9.7719	9.88132	9.91045
ENSG00000076053	8.98526	8.99737	9.01987	8.89346	9.02664	8.88461	9.03573	8.88343	9.02304	8.86459	8.85141	8.9144	9.02907	8.99925	9.01028	8.92627	8.94654	8.91255	8.89359	8.92724	8.85312	8.96593	9.07674
ENSG00000076067	9.9192	9.8106	9.79564	9.69952	9.6121	9.6433	9.4941	9.6497	9.7017	9.69542	9.62149	9.54607	9.59659	9.60338	9.45411	9.39537	9.57945	9.35915	9.38282	9.257	9.70731	9.75385	9.63385
ENSG00000076108	11.0975	11.123	11.0134	11.2006	11.1188	11.0994	11.1477	11.1479	11.0901	11.0568	11.0654	11.0831	11.0965	11.0423	11.0113	10.9305	11.0173	10.9729	10.9404	11.1	11.0286	11.1322	11.1331
ENSG00000076201	10.8823	10.8598	10.8405	10.8283	10.6795	10.7068	10.7527	10.8411	10.8395	10.8759	10.8625	10.8267	10.9061	10.7294	10.7657	10.8875	10.8539	10.9902	10.9991	10.9773	11.1188	11.0011	11.0762
ENSG00000076242	8.42316	8.50003	8.2636	8.52548	8.62909	8.52261	8.41595	8.39432	8.41035	8.48501	8.50095	8.5997	8.54179	8.59377	8.48619	8.65459	8.47571	8.47389	8.40706	8.5171	8.88285	8.88777	8.83481
ENSG00000076248	9.14263	9.26222	9.06244	9.30664	9.43959	9.32647	9.41384	9.34614	9.30521	9.31818	9.37325	9.33437	9.11762	9.18701	9.19162	9.07394	9.18041	9.0027	9.0304	9.00036	8.2441	7.8551	7.84879
ENSG00000076258	6.61404	6.96092	6.94253	7.09803	7.20668	7.02308	7.18235	7.01904	6.72924	7.01965	7.1146	6.9394	6.85972	6.89368	7.04931	7.06636	6.90325	6.57218	6.78558	6.42425	5.61893	5.84484	5.56013
ENSG00000076321	9.31921	9.40054	9.30594	9.44484	9.27383	9.36463	9.31167	9.25443	9.37921	9.25498	9.35374	9.25959	9.16154	9.35903	9.28217	9.24761	9.32833	9.13504	9.22166	9.26119	8.55374	8.50403	8.36536
ENSG00000076351	11.0601	11.1136	11.061	11.0746	11.1312	11.2661	11.1972	11.0764	11.1268	11.176	11.205	11.2572	11.2764	11.1714	11.2675	11.1888	11.2564	11.104	11.179	11.1984	10.3387	10.4105	10.4235
ENSG00000076356	9.01489	8.79582	8.84286	8.75539	8.70748	8.81217	8.80683	8.84184	8.84515	8.9039	8.91894	9.02388	8.86919	8.93346	8.78835	8.90889	8.88751	9.0455	8.83844	9.06391	10.0937	10.0894	10.0681
ENSG00000076382	7.52666	7.35182	7.47814	7.54064	7.5384	7.52232	7.67109	7.7492	7.67914	7.36775	7.48514	7.2487	7.22371	7.34023	7.46768	7.53517	7.44833	7.21057	7.1998	7.07445	6.2158	6.18017	6.11348
ENSG00000076513	9.68128	9.91137	9.73979	9.81987	9.83994	9.92033	9.95618	9.89724	9.7784	9.83026	9.87549	9.84291	9.77423	9.86386	9.7976	9.80931	9.75081	9.62754	9.67318	9.80576	9.22217	9.34444	9.48751
ENSG00000076554	9.01814	8.76738	8.80571	8.88792	8.98146	8.94126	9.03758	8.9256	8.87743	9.08736	8.93013	9.12845	8.86295	8.97527	9.11833	9.11714	9.1743	8.97014	9.1569	9.15865	9.14957	9.23628	9.42813
ENSG00000076555	8.4903	8.89828	8.89433	8.82608	9.08653	9.09921	9.10272	8.79464	8.81879	9.08155	9.07005	8.86817	8.84722	8.704	8.85234	8.79682	8.73955	8.51218	8.72303	8.49881	7.1165	7.01592	6.95058
ENSG00000076604	10.9167	10.8475	10.9289	10.826	10.6979	10.7343	10.7446	10.851	10.8063	10.7641	10.8455	10.7577	10.7834	10.8101	10.7657	10.7601	10.8148	10.8045	10.7459	10.7356	10.9578	10.8748	10.8643
ENSG00000076641	10.0757	10.0264	9.99686	10.2431	10.1795	10.2342	10.1435	10.1856	10.2459	10.1432	10.2224	10.1522	10.1255	10.1881	9.88857	9.99648	10.0034	9.91158	9.80944	10.0158	9.70306	9.82849	9.73746
ENSG00000076650	7.48963	7.65039	7.38272	7.55181	7.41641	7.44428	7.5594	7.60812	7.61166	7.56457	7.46103	7.41413	7.55344	7.63277	7.58114	7.48913	7.37381	7.5813	7.59572	7.59173	7.46988	7.50186	7.746
ENSG00000076662	7.02969	6.73344	6.80208	7.28363	7.2738	7.07003	7.33551	7.05382	6.98765	7.10646	7.07279	7.21743	6.94498	6.89368	6.81248	7.20573	7.12392	6.97782	7.09307	6.71775	6.81815	6.99857	7.09577
ENSG00000076685	10.8212	10.7954	10.821	10.748	10.7264	10.69	10.7372	10.8025	10.7012	10.686	10.7468	10.6757	10.7406	10.7853	10.8004	10.6804	10.7881	10.6473	10.749	10.796	10.7452	10.8252	10.8132
ENSG00000076706	5.94819	5.69727	6.75596	5.69037	5.73485	5.35032	5.43621	5.90871	6.03376	5.84123	5.5091	5.67238	5.87209	6.31477	5.90788	5.45033	5.80614	5.93821	5.77906	6.11423	7.05354	7.07506	7.1736
ENSG00000076716	7.83046	7.20554	7.60062	7.31018	6.81435	6.93706	6.9865	7.24654	7.15499	7.13977	6.64357	7.07351	7.38931	7.27922	7.17696	7.31533	7.33505	7.77784	7.4734	7.55681	10.2633	10.3425	10.4111
ENSG00000076770	13.8021	13.9255	13.8983	14.1517	14.293	14.331	14.3269	14.1493	14.0719	14.157	14.1182	14.0466	14.0128	14.0376	13.8406	13.8387	13.8045	13.4416	13.4404	13.5463	11.9585	11.8913	11.8822
ENSG00000076826	10.8193	10.8071	10.8273	10.8306	10.6144	10.5562	10.6735	10.738	10.7707	10.7589	10.9123	10.5999	10.7625	10.6644	10.5671	10.7657	10.6617	10.8385	10.8613	10.7885	10.4957	10.3773	10.3553
ENSG00000076864	10.2752	10.1638	10.2549	10.2431	10.0879	10.0519	10.1028	10.1725	10.2247	10.1716	10.1235	10.2339	10.115	10.2485	10.3028	10.2963	10.3148	10.5558	10.4385	10.4782	10.7514	10.6599	10.585
ENSG00000076924	9.27637	9.30153	9.23417	9.34887	9.17446	9.15743	9.16401	9.214	9.20702	9.19682	9.11195	9.1562	9.19921	9.2291	9.0832	9.25908	9.21551	9.38247	9.32128	9.28485	9.29372	9.13608	9.09149
ENSG00000076928	10.0216	9.73184	9.98566	9.81525	9.59201	9.65951	9.73167	9.74061	9.8055	9.75163	9.81019	9.73848	9.88007	9.59905	9.78308	9.80462	9.68684	9.88826	9.85447	9.97004	10.5423	10.4525	10.5262
ENSG00000076944	9.86342	9.98047	10.0694	9.77054	9.76527	9.77912	9.85923	9.83194	9.91954	9.92406	9.86175	9.87333	9.87698	9.7751	9.70628	9.87344	9.89434	10.0229	9.96344	9.94748	10.3346	10.2953	10.2443
ENSG00000076984	9.54805	9.48346	9.61132	9.48908	9.46032	9.24954	9.51354	9.50957	9.60419	9.32905	9.53598	9.26215	9.40235	9.47045	9.40104	9.49479	9.40518	9.57842	9.52856	9.5133	9.75593	9.58286	9.61346
ENSG00000077044	8.89257	8.94159	8.87018	8.91956	8.91093	8.87631	8.92098	8.79121	8.83532	8.94688	9.05402	8.90462	8.95391	8.96424	9.09501	9.00472	8.90745	9.09291	8.94311	9.15078	9.46679	9.62446	9.45246
ENSG00000077063	3.79175	4.16687	4.07028	4.50476	3.59143	4.18655	3.9164	4.24289	3.96051	4.09546	3.6868	4.43639	3.01257	3.40407	4.23448	3.54607	4.58977	3.29673	3.8558	3.89134	3.30569	3.36224	3.74489
ENSG00000077092	8.28951	7.9761	8.21328	8.1745	7.88355	8.13257	7.85128	8.15901	8.13931	7.88251	7.89217	8.06229	7.92719	8.25659	7.9166	8.04514	8.14699	7.86236	8.03521	8.08388	8.49868	8.36539	8.41573
ENSG00000077097	10.5036	10.4111	10.4531	10.4408	10.4026	10.4919	10.4446	10.479	10.4226	10.3915	10.357	10.4876	10.4809	10.4955	10.4317	10.4149	10.4123	10.313	10.3311	10.333	10.6013	10.6681	10.6233
ENSG00000077147	11.4815	11.4479	11.4745	11.4817	11.4954	11.4348	11.4719	11.4737	11.4694	11.3754	11.4313	11.4778	11.5072	11.5779	11.5608	11.5298	11.5656	11.4763	11.4212	11.4763	12.2568	12.318	12.3544
ENSG00000077150	10.1503	10.1031	10.0705	9.88313	9.85567	9.81229	9.79996	9.90519	9.7954	9.80712	9.95964	9.79253	9.90308	9.86237	9.7405	9.80306	9.79253	9.77896	9.75297	9.68159	10.1361	10.2074	10.1544
ENSG00000077152	5.30553	4.58615	5.10236	4.19863	5.00684	4.49254	4.69737	5.59907	5.00975	5.12095	4.84371	4.87085	5.1014	5.26247	5.05769	4.48295	5.03881	5.21113	4.76593	4.97481	5.64051	5.19323	5.28206
ENSG00000077157	8.64565	8.61148	8.72512	8.87135	8.55393	8.5099	8.43416	8.58869	8.53699	8.55459	8.43647	8.65521	8.53395	8.44695	8.3744	8.42931	8.56215	8.40981	8.68154	8.80589	8.22279	8.3102	8.32872
ENSG00000077232	10.7767	10.6786	10.7683	10.7492	10.7282	10.8448	10.7029	10.7982	10.7604	10.7933	10.7174	10.8353	10.7346	10.804	10.7583	10.7373	10.9355	10.975	10.9076	10.9145	11.7171	11.7786	11.812
ENSG00000077235	10.7525	10.6658	10.7165	10.7124	10.4838	10.7443	10.6888	10.6621	10.6985	10.6034	10.6318	10.604	10.685	10.622	10.5554	10.5741	10.4904	10.6367	10.4905	10.6033	10.6971	10.7371	10.6402
ENSG00000077238	10.6886	10.6733	10.6792	10.5809	10.5433	10.6644	10.6069	10.5416	10.5331	10.5793	10.6336	10.5253	10.6002	10.5146	10.5447	10.5425	10.4158	10.5165	10.483	10.5277	10.8316	10.9095	10.8411
ENSG00000077254	9.56595	9.64281	9.53656	9.55439	9.52669	9.58065	9.58047	9.57089	9.60612	9.4634	9.54748	9.64365	9.70608	9.65502	9.72349	9.50832	9.66552	9.44318	9.637	9.62877	9.47882	9.29909	9.38267
ENSG00000077264	7.8956	8.16455	7.82939	7.98154	7.83358	7.9626	7.9621	7.92856	8.18129	7.96846	7.91009	7.95894	7.91516	7.8876	7.77703	7.7259	7.76496	7.91167	7.82739	7.83265	6.74033	6.68814	6.55537
ENSG00000077274	4.46115	3.9578	4.51996	4.83235	4.53031	4.62421	4.28076	4.71799	4.14152	4.22527	4.84371	4.01942	4.59872	4.40124	4.79367	4.2816	4.21606	4.16335	3.61256	4.41261	3.50708	3.127	2.70357
ENSG00000077279	3.198	3.24503	1.46227	1.96111	3.81391	3.41682	3.69266	2.64953	3.37366	4.22527	3.6868	2.41891	3.01257	1.54457	1.07996	3.13223	3.29167	3.18448	3.31982	3.0671	1.68796	1.34893	1.25007
ENSG00000077312	8.18915	8.24741	8.23866	8.10797	8.34243	8.14359	7.94315	8.20615	8.2271	8.34207	8.09901	7.98393	7.99729	8.07363	7.79161	8.19607	8.15257	7.99722	8.03933	8.11302	8.17553	7.82096	7.84013
ENSG00000077348	5.89254	5.4795	5.59682	5.87952	5.62163	5.23144	5.63822	6.1204	5.37789	5.05263	5.5091	5.36513	5.82146	5.49489	5.50968	5.24403	5.657	5.9208	5.89252	5.95169	6.40422	6.36159	6.61746
ENSG00000077380	10.4975	10.3639	10.4362	10.3957	10.4731	10.4387	10.3775	10.3826	10.5489	10.4844	10.3787	10.5111	10.4657	10.6333	10.6302	10.5123	10.6327	10.5635	10.5169	10.5062	10.5818	10.7188	10.62
ENSG00000077420	8.46191	8.32031	8.56382	8.55353	8.5769	8.48413	8.43868	8.56878	8.36553	8.39821	8.31169	8.4145	8.52211	8.57938	8.45904	8.45349	8.36465	8.34275	8.22769	8.35581	8.22993	8.31371	8.42444
ENSG00000077454	10.2501	10.2249	10.2489	10.1797	10.1093	9.97221	10.1246	10.1374	10.0469	10.2628	10.2816	10.0314	10.1444	9.92104	10.0132	10.0335	9.95403	10.0997	10.1483	9.98395	9.98294	9.86759	9.89635
ENSG00000077458	8.32147	8.43081	8.40852	8.32528	8.58069	8.51415	8.58439	8.29606	8.27635	8.13465	8.4851	8.33902	8.22863	8.17759	8.27932	8.21975	8.5871	8.12816	8.28768	8.43871	7.56888	7.64813	7.66011
ENSG00000077463	8.18915	8.03059	8.15228	7.81542	7.80793	7.8925	7.92395	7.98372	8.02869	7.94038	7.96255	8.11414	7.95681	8.03724	8.1035	8.06096	7.96224	8.23063	8.22046	8.18796	8.80853	8.5524	8.4978
ENSG00000077514	7.36227	7.14508	7.16177	7.24287	7.45823	7.24389	7.20374	7.12096	7.24681	7.03744	6.77976	7.13058	7.12278	6.97288	7.2099	7.21519	7.17967	7.30754	7.24323	7.15137	7.54046	7.56215	7.50999
ENSG00000077549	11.4034	11.3655	11.3295	11.396	11.4701	11.3939	11.4597	11.4581	11.3306	11.3604	11.3935	11.3776	11.4163	11.4512	11.4248	11.4051	11.4297	11.3982	11.3339	11.3195	11.3704	11.3115	11.2978
ENSG00000077585	5.02411	5.51815	5.57042	5.64937	5.43316	5.27216	4.81321	5.07479	5.22573	5.36584	5.07311	5.43928	5.56864	5.15012	5.67608	5.35086	5.96687	5.69361	5.26451	5.37834	6.51352	6.67728	6.56591
ENSG00000077616	7.83046	7.88291	7.94695	8.15266	8.2785	8.31417	8.20945	8.0712	8.12325	8.03194	8.23319	8.0024	7.99158	7.78474	8.07398	7.73907	8.08993	7.79706	7.79857	8.11302	7.20607	7.05841	7.2343
ENSG00000077684	9.52078	9.58253	9.60645	9.64581	9.48075	9.46465	9.39769	9.46073	9.54915	9.43349	9.41986	9.46436	9.5379	9.58472	9.52619	9.47918	9.50239	9.4447	9.51681	9.57743	8.73018	8.73636	8.76338
ENSG00000077713	7.68244	7.75119	7.6953	7.95655	7.97282	8.0055	7.99927	7.89699	7.98195	7.72681	8.0833	7.79916	8.09112	7.91077	7.82743	7.83422	8.07237	8.03007	7.82739	7.85582	7.71843	7.73451	7.83143
ENSG00000077721	9.78234	9.56187	9.76766	9.65101	9.75859	9.5847	9.63658	9.622	9.72973	9.68267	9.66295	9.67851	9.68853	9.75443	9.77025	9.82639	9.81558	9.70587	9.70718	9.69931	9.7209	9.72019	9.70685
ENSG00000077782	8.55446	8.37924	8.44531	8.49109	8.30624	8.16537	8.31147	8.24179	8.38362	8.15922	8.44878	8.44181	8.42794	8.29232	8.51283	8.26144	8.49781	8.66117	8.64152	8.79094	9.00643	9.02906	9.08235
ENSG00000077942	9.52078	9.23056	9.57857	9.42372	9.27617	9.45141	9.43885	9.35547	9.26916	9.27386	9.43025	9.19685	9.40235	9.38201	9.18887	9.30631	9.19401	9.29225	9.26971	9.12717	8.95568	8.89247	8.96388
ENSG00000077943	2.17132	2.54751	2.42989	2.41696	3.00618	2.40658	3.10297	2.87372	2.04324	2.07686	1.57512	2.68585	3.59813	1.95448	2.44783	2.28804	2.43195	2.22585	1.69882	2.48879	2.23369	2.49613	1.61721
ENSG00000078018	8.2678	8.11497	8.21328	7.72951	7.99572	7.69699	7.62428	7.88416	7.92132	7.7806	7.95106	8.02665	8.16912	8.21065	8.48619	8.22912	8.3885	8.91308	9.00749	8.99776	10.5358	10.6743	10.5687
ENSG00000078043	7.08038	7.16957	7.44218	7.17227	7.2738	7.4082	7.18235	7.16405	7.27616	7.44973	7.31622	7.48587	7.38059	7.56135	7.41215	7.44961	7.51919	7.74359	7.63429	7.67225	7.61866	7.70807	7.75062
ENSG00000078061	10.2056	10.1653	10.1294	10.1598	10.2621	10.3659	10.2642	10.2743	10.2582	10.3863	10.3049	10.3001	10.3044	10.2314	10.3079	10.2806	10.1543	10.3622	10.3353	10.2557	10.4786	10.4573	10.3415
ENSG00000078070	8.90317	8.99395	8.96951	8.88907	9.2165	9.12167	9.12251	8.91303	9.09069	9.07295	9.09898	9.0537	9.02276	9.15097	8.94656	9.01017	8.99085	8.93709	8.9906	8.98468	8.51629	8.6192	8.52235
ENSG00000078081	4.46115	4.65714	4.77248	4.75716	4.59173	4.18655	4.75645	4.53315	3.8607	4.98091	4.62966	4.36209	5.01391	4.79911	5.57856	5.38479	5.88874	6.03849	6.09572	5.93002	9.54755	9.71754	9.64609
ENSG00000078114	8.77823	8.75595	8.76932	8.7698	8.8144	8.83614	8.84476	8.77045	8.78175	8.68443	8.80223	8.87486	9.01714	8.93346	9.20257	9.07913	9.03987	9.29901	9.16257	9.2149	9.95207	10.2224	10.081
ENSG00000078124	9.09719	8.76401	8.86747	9.12791	9.0014	8.93456	8.90148	8.91933	8.97014	9.01129	8.84633	9.09443	9.05872	9.01324	9.01028	9.03708	9.20211	8.97555	9.09504	9.2149	9.22753	9.16359	9.12927
ENSG00000078140	10.5705	10.5586	10.5826	10.6384	10.8023	10.7215	10.6189	10.6441	10.6812	10.6547	10.7542	10.7321	10.7008	10.6754	10.7102	10.6761	10.7174	10.6273	10.6776	10.7862	10.7226	10.763	10.7898
ENSG00000078142	8.62018	8.59349	8.67333	8.73103	8.82403	8.73051	8.7352	8.68797	8.82211	8.7667	8.61096	8.79944	8.64368	8.68396	8.7478	8.56496	8.57883	8.75504	8.83134	8.67848	8.66059	8.78777	8.80843
ENSG00000078177	9.57481	9.67738	9.65438	9.60351	9.66526	9.85145	9.81914	9.71548	9.72796	9.72992	9.54938	9.79429	9.78252	9.87421	9.71778	9.62646	9.57902	9.46737	9.46119	9.74501	9.6063	9.86844	9.72576
ENSG00000078237	9.12722	8.9237	9.00274	8.59919	8.94956	8.99054	8.64954	9.03118	8.92916	8.93744	8.8569	8.769	8.65185	8.9061	8.95953	8.92339	8.88137	8.96497	9.04274	8.94707	8.75863	8.74422	8.47509
ENSG00000078246	8.45232	8.40525	8.44531	8.50839	8.34243	8.49277	8.51765	8.4123	8.2908	8.45885	8.42405	8.33417	8.32719	8.3821	8.31003	8.37971	8.37901	8.39096	8.66832	8.64563	8.69451	8.89012	8.98758
ENSG00000078269	10.245	10.3004	10.1761	10.2328	10.2797	10.2161	10.2604	10.2115	10.3112	10.1876	10.2355	10.3186	10.3284	10.2405	10.2602	10.2806	10.3371	10.4761	10.4039	10.4819	10.5365	10.5584	10.4858
ENSG00000078304	10.0661	10.0231	10.0867	10.0397	10.2308	10.1789	10.1184	10.0967	10.0629	10.1775	10.0803	9.94323	10.0297	10.0276	10.0947	9.96428	10.0322	9.88567	9.86256	10.0037	9.83518	9.82352	9.92803
ENSG00000078369	12.4415	12.3239	12.3815	12.33	12.314	12.2998	12.2829	12.2458	12.3439	12.3526	12.3159	12.319	12.3238	12.3624	12.3767	12.3407	12.4019	12.4123	12.3645	12.3995	12.6327	12.6465	12.6136
ENSG00000078401	5.64562	5.4795	5.51611	4.97191	5.29228	5.05598	5.06766	5.46767	5.10006	5.47427	5.71341	4.81624	5.59902	5.36669	4.85048	5.38479	5.03881	4.70096	3.9978	4.06043	4.17276	3.46689	3.66875
ENSG00000078403	9.2517	9.32896	9.25504	9.34567	9.38209	9.3903	9.40694	9.34614	9.47092	9.31818	9.4136	9.30244	9.4002	9.28559	9.41052	9.30188	9.4145	9.45835	9.41762	9.57569	9.16375	9.40989	9.41362
ENSG00000078487	4.5357	4.65714	4.51996	4.75716	3.70696	4.55988	4.57141	4.65897	4.69898	5.3084	4.68623	4.81624	4.92077	4.19018	4.85048	4.81699	4.58977	4.96155	4.55235	4.69547	5.38325	4.68682	4.90445
ENSG00000078596	2.17132	2.21247	2.42989	3.0416	2.81341	2.0795	2.9083	3.39154	3.75348	2.89487	2.57265	2.41891	1.59455	2.75521	3.46282	3.13223	2.92492	2.22585	2.45752	2.89884	2.23369	2.03367	2.70357
ENSG00000078618	11.3274	11.3976	11.3398	11.456	11.5287	11.5903	11.5491	11.4358	11.5173	11.4684	11.4925	11.4137	11.4645	11.3856	11.3633	11.3791	11.3698	11.279	11.3128	11.3867	11.16	11.2241	11.1776
ENSG00000078668	10.1577	10.0856	10.2235	10.2671	10.3063	10.2509	10.2794	10.2532	10.3882	10.223	10.2764	10.1862	10.3147	10.2699	10.4095	10.2476	10.3589	10.2928	10.2606	10.333	10.2763	10.2953	10.3105
ENSG00000078674	10.8295	10.811	10.7827	10.8646	10.9019	10.9505	10.7743	10.8303	10.8534	10.7575	10.8299	10.8189	10.8385	10.8852	10.8483	10.7149	10.847	10.8222	10.8164	10.8395	10.8941	10.9769	10.9042
ENSG00000078687	8.81611	8.83462	8.94403	8.83981	8.85253	8.86305	8.86838	8.9535	8.91523	8.98861	8.88309	8.9144	8.93914	9.09644	8.82779	8.74552	8.8119	8.91748	8.85019	8.89526	8.56507	8.58764	8.60128
ENSG00000078699	8.84205	8.95574	9.01428	8.97868	9.07314	9.06195	9.01168	8.98387	8.96113	9.02026	9.11195	8.90134	9.01995	8.92495	8.81	8.98551	8.95934	9.0812	9.1455	9.17401	8.99809	8.90882	8.94383
ENSG00000078725	4.01664	2.54751	3.63345	3.80955	4.25462	3.26368	3.27447	2.64953	3.05032	3.41368	3.15679	3.56915	3.01257	4.11236	3.46282	3.76795	2.43195	3.29673	2.45752	0.943067	1.31112	1.34893	2.36053
ENSG00000078747	10.4318	10.2303	10.1973	10.4519	10.4338	10.3491	10.3124	10.327	10.2998	10.3207	10.4097	10.3939	10.3284	10.2986	10.3039	10.3431	10.4243	10.3009	10.3599	10.4399	10.3611	10.4774	10.4994
ENSG00000078804	10.1753	10.1669	10.0858	10.2856	10.1694	10.3132	10.2553	10.0643	10.118	10.2055	10.2856	9.95774	9.95245	9.89469	9.64336	9.73235	9.79074	9.55462	9.41446	9.56694	9.94015	9.94404	9.90965
ENSG00000078808	11.6111	11.7244	11.6726	11.6748	11.6514	11.6706	11.6921	11.7264	11.6119	11.7073	11.776	11.5898	11.6978	11.6008	11.5171	11.6632	11.6084	11.6435	11.6027	11.4884	11.6892	11.6092	11.5816
ENSG00000078814	1.73823	2.21247	2.42989	2.76282	3.32828	3.26368	3.10297	3.23869	3.22103	2.54308	2.79469	2.68585	2.01078	1.95448	2.71588	2.28804	1.06974	2.22585	2.95216	2.70834	2.44467	1.73155	2.54223
ENSG00000078902	10.8742	10.9562	10.9711	10.8511	10.8525	10.7542	10.9276	10.8502	10.8926	10.8968	10.976	10.8583	10.9758	10.8316	10.8219	10.8667	10.7881	10.9147	10.8104	10.7426	10.6231	10.571	10.5542
ENSG00000078967	8.19491	8.36871	8.31619	8.21721	8.29706	8.11589	8.27658	8.31051	8.3564	8.32044	8.40311	8.36779	8.2811	8.22458	8.34998	8.3152	8.30072	8.40355	8.38461	8.25485	8.57351	8.362	8.43597
ENSG00000079101	4.21116	4.91062	4.77248	4.59389	3.59143	4.74485	4.50405	4.16018	4.81017	4.09546	4.93989	4.63878	4.92077	4.98526	4.541	4.714	4.65416	3.49799	4.8051	3.69977	2.93848	3.127	2.84868
ENSG00000079112	4.5357	3.84069	3.63345	4.08022	4.59173	4.09871	4.43339	4.07244	3.51168	4.45436	4.30789	4.01942	4.65764	3.64421	3.72834	3.86728	4.65416	3.83191	3.0854	3.0671	3.4099	3.24941	3.41275
ENSG00000079134	8.76279	8.76802	8.71611	8.73593	8.7144	8.7878	8.58846	8.67314	8.81879	8.6674	8.74014	8.78529	8.66178	8.61509	8.72899	8.68894	8.91733	8.65064	8.87571	8.80886	8.42597	8.42505	8.62162
ENSG00000079150	6.07859	6.07972	6.27352	6.47987	6.44992	6.14791	6.49078	6.39813	6.34205	5.52558	5.96273	6.44073	6.24298	6.41541	6.2829	6.26184	6.08836	5.93821	6.14235	6.26029	5.84024	5.46997	5.97806
ENSG00000079156	7.41259	7.51361	7.52701	7.28363	7.49084	7.68949	7.60833	7.42541	7.32379	7.5019	7.26143	7.6274	7.51412	7.43118	7.46768	7.65121	7.54489	7.30083	7.55034	7.32743	6.45382	6.58729	6.62755
ENSG00000079215	6.77657	6.6833	6.79068	6.86721	6.6652	6.68896	6.87095	6.79067	7.13377	6.76597	6.77976	6.42256	6.64357	6.95069	6.70875	6.41744	6.45656	6.07042	6.24562	6.31147	4.23083	4.55058	4.43816
ENSG00000079246	11.5427	11.4959	11.5283	11.4545	11.5069	11.5086	11.5438	11.4694	11.5178	11.5144	11.4349	11.559	11.4972	11.6433	11.5517	11.5491	11.5451	11.5997	11.5282	11.5196	11.7531	11.8047	11.7886
ENSG00000079257	5.6789	5.31361	5.37067	5.27117	5.88958	5.52896	5.47191	5.46767	5.34133	5.84123	5.19507	5.76179	5.44029	5.55496	5.15111	6.18691	5.41833	5.47245	5.31964	5.34597	5.70339	5.80547	5.25627
ENSG00000079263	2.5217	2.84134	1.90244	2.42475	2.3505	2.71144	2.91661	2.69489	3.25916	2.95898	2.84326	2.70762	2.04296	3.00131	1.7587	0.99306	2.77778	2.8229	1.74789	2.91305	3.34092	4.57654	4.26382
ENSG00000079277	9.68333	9.8931	9.77924	9.80128	9.8431	9.86981	9.74632	9.63163	9.75427	9.87792	9.74345	9.88166	9.70608	9.59905	9.6026	9.68208	9.70405	9.66593	9.92284	9.79831	9.21859	9.2001	9.23372
ENSG00000079308	9.32448	9.59615	9.3493	9.49777	9.56929	9.47341	9.6128	9.41241	9.33573	9.52772	9.45284	9.39385	9.4002	9.33354	9.30013	9.24299	9.14163	9.28547	9.20712	9.11522	8.94053	9.27767	9.01859
ENSG00000079313	9.64174	9.59163	9.64966	9.6562	9.39937	9.46685	9.45008	9.58681	9.54312	9.44352	9.58515	9.35367	9.56701	9.36324	9.3819	9.50061	9.36967	9.66201	9.60961	9.56518	9.71963	9.79747	9.7788
ENSG00000079332	10.3839	10.4763	10.4905	10.5727	10.5607	10.4702	10.4299	10.4478	10.3994	10.3829	10.469	10.4466	10.5162	10.5259	10.5032	10.5302	10.5687	10.3758	10.3643	10.4884	10.3898	10.5209	10.5058
ENSG00000079335	7.22257	7.16957	7.23924	7.11319	7.01823	6.51326	7.03503	6.93447	7.09036	6.86888	6.88016	6.97723	6.96844	6.96183	6.85475	7.06636	7.07772	6.76989	6.96922	6.83897	6.9961	7.39318	7.05896
ENSG00000079337	2.17132	3.57338	3.91105	3.80955	2.81341	3.79768	3.9164	3.77179	3.37366	3.17748	3.98614	4.01942	3.92029	3.75078	3.72834	3.96021	3.44513	4.03975	3.42414	3.89134	6.28595	6.67728	6.22403
ENSG00000079385	9.98384	9.82343	9.8968	9.81061	9.6491	9.75778	9.67154	9.7263	9.94605	9.81229	9.80541	10.0134	9.91067	9.92631	9.89534	9.92335	10.0445	10.1051	10.1289	10.0311	10.8403	10.8943	10.8082
ENSG00000079387	8.15998	8.02389	7.99241	8.1745	7.99572	7.98114	8.11101	7.97164	8.12325	7.83246	7.95106	8.13661	8.20413	8.11412	8.1495	7.85252	8.08993	7.89839	7.98066	8.09852	8.19389	8.2782	8.33797
ENSG00000079393	4.5357	3.41853	4.57412	3.47608	3.91348	3.79768	4.19793	4.65897	3.22103	4.98091	4.30789	3.91933	3.92029	4.69617	4.14647	4.54428	2.92492	4.99521	5.26451	5.05708	6.90096	6.7308	6.64752
ENSG00000079432	11.3469	11.1471	11.2982	11.2741	11.1305	11.1724	11.1304	11.2792	11.231	11.1239	11.2672	11.0361	11.267	11.0573	10.9427	11.0463	11.0066	11.0604	11.0565	10.9418	11.0773	11.0451	10.9567
ENSG00000079435	4.5357	4.51148	4.72539	4.59389	4.8648	4.74485	4.3591	4.93253	4.91341	4.74153	3.98614	4.97424	4.71425	4.26402	4.60844	4.41891	4.65416	5.02811	5.11667	5.1349	5.98223	6.27776	5.5389
ENSG00000079459	12.2596	12.3301	12.247	12.4415	12.5833	12.6782	12.6926	12.4815	12.4534	12.5165	12.6585	12.4206	12.3694	12.3377	12.1815	12.1584	12.1817	12.0218	12.0406	12.0102	11.9574	11.8162	11.68
ENSG00000079462	7.94431	7.89764	7.84049	7.75872	7.44996	7.03496	7.35476	7.8115	7.78503	7.6595	7.66477	7.37688	7.78908	7.63277	7.54717	7.61594	7.58673	7.89393	7.66123	7.39225	7.54619	7.47073	7.47129
ENSG00000079482	6.93646	6.87418	6.75596	6.67633	6.80141	6.91151	6.67049	6.72024	6.77108	6.84888	6.77976	6.54517	6.75569	6.49423	6.78359	6.64444	7.13525	7.07547	6.70504	7.25085	7.27668	7.09968	7.38468
ENSG00000079557	9.34794	9.67096	9.57691	9.6432	9.92293	10.1724	10.1296	9.89724	9.74205	9.91206	9.90111	9.68614	9.68322	9.59727	9.36005	9.41701	9.34061	9.03946	8.9778	8.9635	7.75352	7.64813	7.746
ENSG00000079616	7.39267	6.82878	7.37512	7.17227	6.87736	6.8855	7.20374	7.07655	7.21685	7.23533	7.01875	7.07351	6.89688	7.38228	7.31457	7.21519	7.06593	7.1446	6.85255	6.83897	7.00445	6.99857	6.72477
ENSG00000079689	5.57667	5.26898	5.13875	5.47263	5.5615	5.65749	5.60645	5.98278	5.18505	5.42107	4.93989	5.57705	5.59902	5.22598	5.23884	5.16814	5.13219	5.67296	5.47344	5.47128	6.58204	6.79251	6.37544
ENSG00000079691	8.2402	8.17063	8.38219	7.91391	8.46647	7.9055	8.18815	8.15368	8.32397	8.01408	8.25205	8.33417	8.50617	8.21531	8.24795	8.24306	8.11874	8.2447	8.29802	8.48773	8.57911	8.49787	8.46722
ENSG00000079739	9.97046	9.94722	10.0141	10.0656	10.1051	10.1425	10.0914	10.1036	10.0962	10.1329	10.0459	10.13	10.0696	10.0436	10.0073	9.91756	10.1446	9.97094	9.9038	9.7878	9.7584	9.75031	9.86236
ENSG00000079785	9.99709	10.0759	10.0985	10.0888	10.2431	10.1439	10.1831	10.1064	10.1167	10.0866	10.1861	10.1328	10.0831	10.0901	10.0996	10.1437	10.3662	10.2119	10.1773	10.1436	10.0731	10.1516	10.2333
ENSG00000079805	11.5888	11.6376	11.5634	11.5446	11.5472	11.55	11.5491	11.5221	11.6086	11.5894	11.6191	11.5386	11.5598	11.5131	11.5356	11.5713	11.5677	11.6415	11.5884	11.5045	11.4531	11.3822	11.3448
ENSG00000079819	8.3984	8.17063	8.30822	8.18888	8.07312	8.0055	7.86477	8.27164	8.1552	7.94038	7.86179	8.21785	8.08577	8.25659	8.13814	8.11249	8.11874	8.13194	8.06376	8.00835	9.06745	9.08972	8.92554
ENSG00000079931	3.79175	1.14507	3.73204	3.27513	3.1762	2.40658	3.80886	4.32111	3.96051	3.41368	2.98707	3.27729	3.7137	3.11581	3.9525	3.42086	3.58383	3.49799	3.20736	2.89884	3.84118	4.50215	3.81722
ENSG00000079950	10.2394	10.133	10.2032	9.99167	10.1631	10.112	9.94194	10.1566	10.1554	10.1817	9.99226	10.1074	10.1281	10.187	10.2	10.1212	10.2249	10.2029	10.1884	10.2271	10.2396	10.2064	10.1588
ENSG00000079974	8.51387	8.3705	8.49153	8.23775	8.41477	8.13307	8.18863	8.26814	8.5987	8.04395	8.30723	8.30244	8.28381	8.25165	8.55198	8.31287	8.31702	8.3891	8.58314	8.62753	8.37857	8.41165	8.42079
ENSG00000079999	10.2629	10.3468	10.2765	10.3186	10.1363	10.1411	10.2437	10.247	10.3622	10.1956	10.289	10.2863	10.3807	10.2337	10.4282	10.3509	10.2654	10.4731	10.4517	10.4801	10.5867	10.4856	10.4754
ENSG00000080031	8.04983	7.92667	7.84049	7.94812	7.89577	7.78404	7.94315	7.7492	7.86447	7.99601	7.82448	8.05051	7.84718	7.95603	8.1495	8.13259	8.01223	8.21643	8.16132	8.23731	9.15815	9.27587	9.24031
ENSG00000080166	2.50398	1.14507	2.17339	1.96111	2.0053	1.65584	1.05974	1.63684	1.02897	2.07686	2.79469	1.66623	1.0072	1.95448	2.44783	0.978915	2.92492	1.97903	1.99824	2.22973	0.799644	0.826693	1.25007
ENSG00000080189	9.46225	9.46626	9.47917	9.54603	9.55201	9.50365	9.41154	9.42796	9.40822	9.54337	9.54748	9.44199	9.46142	9.43292	9.50865	9.57228	9.48479	9.54044	9.55465	9.52419	9.78892	9.77217	9.83431
ENSG00000080200	7.56276	7.67626	7.67066	7.49509	7.74849	7.7556	7.78188	7.57657	7.66441	7.96846	7.37762	7.57079	7.6142	7.27028	7.46768	7.49691	7.65912	7.52479	7.4612	7.58482	8.15318	8.21199	8.18236
ENSG00000080224	4.01664	4.06612	4.14375	3.95122	3.81391	4.09871	4.28076	4.53315	4.14152	4.65201	3.98614	3.81178	4.5373	4.89519	3.9525	3.96021	4.12811	3.40087	3.69828	4.13808	3.59814	4.23214	3.74489
ENSG00000080298	7.62384	7.48462	7.37512	7.59564	7.25494	7.31383	7.42928	7.48609	7.30493	7.42292	7.35163	7.54584	7.40659	7.24316	7.58114	7.53517	7.41155	7.63567	7.43021	7.45429	7.51732	7.65921	7.72265
ENSG00000080345	9.60759	9.53856	9.63221	9.64842	9.69705	9.78793	9.56195	9.57089	9.62715	9.61025	9.52439	9.60591	9.59554	9.80168	9.65338	9.60503	9.73415	9.67894	9.65988	9.74656	9.62807	9.69078	9.75827
ENSG00000080371	9.88927	9.74412	9.87943	9.92882	9.99999	9.89121	9.95145	9.89883	9.99248	9.9407	9.86175	9.94507	9.96125	10.0397	10.1025	9.92335	10.0188	9.86227	9.97637	9.99112	10.1541	10.2093	10.1128
ENSG00000080493	7.01674	7.02942	6.91131	7.08272	6.31075	6.37053	6.68577	6.61549	6.92725	6.4313	6.47723	7.13058	6.98003	7.3144	7.02483	6.82825	6.86296	7.17429	7.0033	7.05456	7.82123	8.13864	7.75062
ENSG00000080503	10.0053	9.94722	10.0432	10.104	10.046	10.1384	10.0358	10.0269	10.1606	10.0233	9.96251	10.0859	10.1018	10.114	10.117	10.0595	10.0126	10.0044	9.94164	10.1115	10.1257	10.1506	10.0938
ENSG00000080546	9.60542	9.85774	9.79927	9.81987	9.89427	9.96913	9.91301	9.93504	9.70476	9.9548	9.84632	9.75309	9.88779	9.90194	9.8262	9.77934	9.80853	9.73729	9.64107	9.73411	8.68675	8.58474	8.59358
ENSG00000080561	7.10507	7.2973	7.25591	7.54064	7.2738	7.09294	7.49146	7.05382	7.33313	7.5273	7.22372	7.30928	7.19417	7.27922	7.42156	7.27972	7.14648	7.34718	7.35962	7.28539	7.88138	7.73974	7.68449
ENSG00000080573	3.79175	3.41853	3.73204	3.80955	3.46585	4.00518	4.3591	3.52973	4.22417	4.09546	4.30789	4.11301	4.47314	3.64421	4.05274	4.2816	3.71035	3.97374	4.40716	3.47881	3.91387	3.46689	4.65102
ENSG00000080603	10.9071	10.847	10.8105	10.9973	10.6931	10.8308	10.8789	10.7312	10.7213	10.7988	10.7796	10.7239	10.7839	10.6861	10.7219	10.6903	10.6582	10.6777	10.784	10.7109	10.3923	10.5409	10.4804
ENSG00000080608	8.2402	7.96215	8.36693	8.10797	8.23104	7.94382	8.00537	8.04262	8.04014	7.77	8.16019	8.21785	8.03111	7.97264	8.27414	8.26144	8.46678	8.35252	8.24203	8.4803	8.50751	8.62487	8.50876
ENSG00000080618	11.3162	11.5098	11.4261	11.5791	11.7443	11.7216	11.7142	11.6041	11.6296	11.6764	11.6416	11.6095	11.5766	11.5578	11.4899	11.4747	11.5275	11.3011	11.2763	11.2621	10.048	9.81493	9.95644
ENSG00000080802	8.79729	8.88356	8.79805	9.07084	8.91093	8.82592	8.84816	8.93807	8.85166	8.87452	8.86789	8.93377	8.87231	8.97252	8.90022	8.88834	8.90745	8.95645	8.94968	8.74514	8.77965	8.67761	8.70023
ENSG00000080815	10.6482	10.5493	10.59	10.6618	10.6848	10.6217	10.716	10.6298	10.7543	10.5899	10.6209	10.7033	10.6699	10.7544	10.7453	10.6761	10.7361	10.7617	10.669	10.7294	10.969	11.0408	10.9761
ENSG00000080819	8.13622	8.06363	8.05088	7.95655	8.05143	8.05884	8.09965	7.8647	7.99966	8.41871	7.9909	8.05051	8.04772	8.06333	8.10933	8.03983	8.19647	8.20209	8.02281	8.08388	8.09965	7.99291	7.92441
ENSG00000080822	9.32972	9.31805	9.24255	9.16111	9.30854	9.24187	9.22803	9.38536	9.2297	9.2701	9.31839	9.2647	9.32495	9.33139	9.43626	9.26593	9.33571	9.28887	9.29572	9.30814	9.39877	9.60882	9.4553
ENSG00000080823	5.94819	5.0224	5.85925	5.98214	5.93768	5.80355	5.63822	5.46767	5.61076	5.66939	5.60023	5.76179	5.76898	5.89418	5.10516	5.08803	5.38076	5.69361	5.5446	5.99407	5.84024	5.70206	5.58106
ENSG00000080824	14.1564	14.01	14.0488	14.0085	14.0627	14.0792	14.0575	14.046	14.1741	14.0791	14.0623	14.2381	14.2046	14.2989	14.392	14.3046	14.414	14.5307	14.4924	14.5298	14.5885	14.5964	14.638
ENSG00000080839	5.86389	5.85658	6.09979	5.94874	5.67935	5.80355	6.02212	6.07597	5.98719	6.16622	5.57049	6.00093	5.87209	6.36597	5.85333	5.88896	6.06487	5.86727	6.12697	6.0554	5.85877	5.99238	6.4794
ENSG00000080845	11.2395	11.123	11.1338	10.9899	10.8604	10.8473	10.8062	11.0123	10.9208	10.856	11.0083	10.9975	11.0277	11.0038	10.8759	11.0135	11.0196	11.1709	11.1059	11.0681	11.4615	11.4108	11.3317
ENSG00000080854	4.60659	4.65714	4.46368	4.40975	4.09411	4.09871	3.80886	4.24289	4.22417	4.34436	4.15596	4.92347	4.65764	4.89519	3.84477	4.76641	4.77491	4.78034	4.55235	4.79471	5.94802	6.2487	5.92994
ENSG00000080910	3.80748	4.85855	4.4791	4.12637	4.13346	4.97541	4.83585	4.72549	5.19942	4.35687	4.95838	4.64631	4.94652	4.80308	4.27821	4.04751	4.37733	3.88674	4.12522	3.9893	2.95787	3.00161	2.55751
ENSG00000080986	4.21116	3.71322	4.07028	2.41696	3.70696	2.40658	2.41636	3.52973	3.63764	3.79447	2.79469	3.69556	3.92029	4.19018	3.72834	3.42086	4.52238	2.78337	3.42414	3.0671	1.98648	2.28335	2.36053
ENSG00000081014	8.26232	8.20065	8.14782	8.29237	8.2262	8.24936	8.42053	8.32007	8.34721	8.15108	8.37758	8.30967	8.20413	8.25206	8.19956	8.28408	8.36465	8.22355	8.45094	8.37197	8.11515	8.29251	8.23941
ENSG00000081019	7.97812	8.19469	8.16997	8.06964	8.07312	8.01753	7.87813	8.15368	8.17611	8.01408	8.07273	8.22835	8.10177	8.03724	8.07398	8.07142	7.98119	7.99722	8.07982	7.99276	7.98623	8.05298	8.08684
ENSG00000081026	8.69121	8.9273	8.76058	8.89346	9.01827	8.92501	8.83108	8.81167	8.83532	8.9039	8.79903	8.77817	8.82811	8.76249	8.7956	8.86149	8.82595	8.73525	8.58075	8.79094	8.35269	8.48858	8.48675
ENSG00000081041	8.35273	8.65549	8.5705	8.21721	8.42016	8.47931	8.25625	8.25679	8.32397	8.36858	8.23793	7.99627	8.11197	7.791	7.86238	7.8309	7.64334	7.24595	7.23608	7.16997	8.27892	8.04032	8.13715
ENSG00000081051	18.9636	18.9836	18.9488	19.0029	19.0462	19.0195	19.0372	19.0099	19.0413	18.9832	19.0491	18.9912	18.977	19.0553	18.9528	18.9044	18.9492	18.6965	18.6809	18.7163	18.2013	18.1393	18.1662
ENSG00000081059	6.45024	6.88901	6.4862	6.04672	6.27375	6.57965	6.67049	6.41606	6.39653	6.4313	6.47723	6.52828	6.70072	6.18773	6.51148	6.73927	6.26369	6.30324	6.34198	6.43967	7.344	7.16335	7.43727
ENSG00000081087	7.8885	7.71004	7.84049	7.76833	7.85252	7.49677	7.73858	7.60812	7.78503	7.56457	7.7797	7.8945	7.63634	8.04249	7.82743	7.96891	8.11303	8.06616	7.86495	7.88427	8.52212	8.59632	8.81728
ENSG00000081148	5.61156	5.5558	5.13875	6.16779	5.59187	5.7177	5.32351	4.98152	5.51552	5.12095	5.93965	4.92347	5.79546	5.15012	5.19564	5.48202	5.74832	5.37352	5.59016	5.81652	4.90141	4.50215	5.30739
ENSG00000081154	10.4286	10.3346	10.4174	10.4348	10.3994	10.5459	10.4812	10.439	10.5391	10.4442	10.4282	10.5631	10.5379	10.5611	10.4843	10.5425	10.5285	10.4723	10.4807	10.4838	10.4979	10.5458	10.6189
ENSG00000081177	8.88546	8.84226	8.85385	8.96621	9.02664	9.02371	8.95606	8.8218	9.01145	8.96558	8.90411	8.91765	8.81522	8.88747	8.80282	8.97997	9.02168	8.87516	8.85019	8.94201	9.45008	9.37669	9.4736
ENSG00000081181	7.86701	7.77532	7.67066	7.48347	7.64365	7.58022	7.68636	7.80471	7.8253	7.98688	7.65771	7.99627	7.83447	7.97814	8.05598	8.21505	8.13575	8.6186	8.46934	8.49144	10.4964	10.6164	10.6668
ENSG00000081189	3.5252	2.21247	4.34409	3.27513	2.81341	3.09234	2.0887	2.87372	3.96051	2.89487	3.30863	3.91933	3.01257	3.26713	3.72834	3.54607	4.03446	3.97374	3.9978	2.22973	3.91387	2.84578	3.66875
ENSG00000081307	9.53675	9.57797	9.59012	9.69197	9.70749	9.70298	9.72983	9.62586	9.56707	9.64547	9.57956	9.51668	9.78748	9.53525	9.77209	9.65974	9.62994	9.50729	9.56181	9.68483	9.75716	9.74121	9.90758
ENSG00000081320	7.01674	6.61361	6.83572	6.98723	6.78835	6.59578	6.67049	6.63093	6.90237	6.29008	6.96261	6.83339	6.74214	6.73396	6.86857	6.60181	6.49223	6.60525	6.7256	6.62639	6.2583	6.47884	6.4794
ENSG00000081377	8.98859	8.97316	9.01178	8.9367	9.10508	9.09638	9.08554	8.89373	9.10158	9.14444	9.01312	9.15889	9.04218	8.9915	9.13558	9.11221	9.24967	9.05748	9.17005	9.21689	8.97275	8.99665	8.95779
ENSG00000081386	7.88137	7.91947	7.90001	7.86102	7.98431	7.9626	7.85128	7.90336	7.92749	7.90206	8.09901	7.88126	7.99729	7.82799	7.73992	8.10233	7.98119	7.78267	7.95477	8.01865	7.08536	6.90853	7.04397
ENSG00000081479	5.12414	4.91062	4.81808	4.08022	5.2548	4.95954	5.43621	5.36061	5.2653	4.82581	4.98568	4.81624	4.65764	4.94093	4.73453	5.28052	4.21606	5.12252	4.95193	5.01653	3.91387	4.64282	3.95183
ENSG00000081692	8.3984	8.27589	8.28811	8.09276	8.06773	8.32389	8.3882	7.87122	8.30985	8.23053	8.30719	8.35827	8.32719	8.30549	8.36468	8.33703	8.54102	8.54664	8.56942	8.38398	8.86692	9.02263	8.84781
ENSG00000081721	7.50826	7.64167	7.45667	7.25659	7.32894	7.35232	7.52583	7.42541	7.75059	7.31039	7.48514	7.50326	7.56117	7.59034	7.68631	7.49691	7.72055	7.63033	7.67186	7.49175	7.64559	7.72399	7.81827
ENSG00000081760	9.34016	9.24215	9.3493	9.55161	9.35134	9.43133	9.41384	9.31542	9.30994	9.47649	9.37541	9.25446	9.37628	9.37994	9.30267	9.12501	9.22614	9.3745	9.3727	9.36172	9.41294	9.4359	9.54721
ENSG00000081791	9.6119	9.7153	9.54845	9.53482	9.73667	9.67857	9.71873	9.61231	9.63284	9.68267	9.80061	9.87165	9.68676	9.48789	9.77759	9.68549	9.68491	9.62082	9.7492	9.73879	9.47582	9.46304	9.28722
ENSG00000081803	8.66239	8.83462	8.65145	8.8029	8.74851	8.81562	8.72414	8.72081	8.76114	8.573	8.76004	8.5997	8.69732	8.78461	8.79198	8.69233	8.81894	8.5803	8.44475	8.59144	8.65264	8.66667	8.81948
ENSG00000081818	4.7387	4.65714	4.72539	3.27513	3.33261	3.89476	4.28076	4.66738	3.9303	4.34436	3.69233	4.75948	4.02335	4.46963	4.31743	4.65795	4.7158	4.15503	4.35796	4.47738	4.23083	4.2351	4.0147
ENSG00000081870	7.42245	7.41463	7.22238	7.55181	7.56161	7.69699	7.61633	7.72782	7.55691	7.42292	7.60734	7.82705	7.4489	7.50155	7.86238	7.4576	7.55335	7.53627	7.43646	7.75468	7.52314	7.64255	7.63532
ENSG00000081913	8.83469	8.93446	8.86747	9.03547	9.06774	8.92501	8.97484	9.10214	8.92762	9.09859	9.03237	8.91115	8.89697	8.74325	8.93347	8.86149	8.93363	8.63738	8.68416	8.60518	8.06416	8.04032	7.91208
ENSG00000081923	9.21531	9.2679	9.09753	9.31322	9.34467	9.44252	9.25133	9.2394	9.30758	9.43684	9.2567	9.41008	9.44479	9.29663	9.47291	9.41291	9.32339	9.43401	9.48701	9.49128	9.50847	9.56676	9.56176
ENSG00000082014	8.25682	8.29271	8.38977	8.31876	8.45825	8.12147	8.46105	8.46923	8.34721	8.40507	8.41571	8.23877	8.29971	8.24296	8.32012	8.55754	8.29062	8.40042	8.48751	8.46907	8.1829	7.99291	8.01177
ENSG00000082068	8.21773	8.34083	8.37839	8.23117	8.39074	8.35265	8.29662	8.23473	8.24205	8.23053	8.2936	8.32931	8.36304	8.4999	8.43603	8.45748	8.21793	8.29151	8.34196	8.26786	8.02215	7.91644	8.15471
ENSG00000082146	10.0374	10.0284	9.98895	10.1372	10.1796	10.2381	10.3095	10.1683	10.239	9.97114	10.0905	10.129	10.1367	10.0832	10.0782	10.018	10.1341	9.96415	9.96576	9.9505	9.81492	9.75897	9.6686
ENSG00000082153	11.6679	11.651	11.6554	11.5982	11.7172	11.7107	11.6909	11.6491	11.7252	11.6722	11.6799	11.6887	11.6764	11.7272	11.7174	11.6233	11.7588	11.6134	11.5803	11.5963	12.0474	12.1426	12.1391
ENSG00000082196	5.97282	5.96324	5.79479	6.34078	5.73811	6.29369	6.02019	5.87928	5.60275	5.44739	6.09709	5.90318	6.00486	5.81213	6.24102	5.89014	6.11285	5.97461	6.15756	6.04858	5.43752	6.00981	5.76016
ENSG00000082212	9.60974	9.66881	9.48801	9.69701	9.84152	9.80711	9.83978	9.78268	9.70656	9.71619	9.75176	9.65342	9.64369	9.57749	9.6272	9.50832	9.65965	9.63557	9.52709	9.74346	9.43781	9.4772	9.48057
ENSG00000082213	8.71947	8.48547	8.62283	8.65021	8.75859	8.75226	8.48308	8.66566	8.79195	8.73435	8.6073	8.87152	8.67966	8.71061	8.77006	8.7905	8.67507	8.66379	8.78312	8.79094	8.68416	8.76743	8.94383
ENSG00000082258	10.0425	9.97354	9.92052	9.95218	9.93186	9.93467	9.84319	9.92412	9.9215	9.92884	9.76495	9.93229	9.79406	9.7464	10.0443	9.96318	9.9043	9.85656	9.83213	10.075	9.80214	9.84315	9.84625
ENSG00000082269	8.90668	8.67273	8.65774	8.74082	8.64729	8.58859	8.51765	8.72081	8.83203	8.73435	8.65768	8.70866	8.81846	8.73678	8.73277	8.56126	8.76164	8.65064	8.58357	8.84404	8.80136	9.1341	9.13989
ENSG00000082397	9.31127	9.25365	9.15863	9.24606	9.37991	9.50792	9.25133	9.24944	9.3496	9.31089	9.3925	9.44649	9.49007	9.52965	9.54783	9.39429	9.43068	9.50583	9.47643	9.506	9.90157	9.86486	9.91275
ENSG00000082438	10.3364	10.393	10.3326	10.4997	10.5119	10.6758	10.5061	10.478	10.5116	10.5346	10.4841	10.4353	10.4458	10.5146	10.4514	10.3838	10.3888	10.2698	10.2168	10.4461	10.1764	10.1506	10.2201
ENSG00000082458	8.89257	8.93088	8.9337	8.84436	8.76193	9.05905	8.94022	8.99585	9.06008	9.03804	8.89813	8.69737	8.95977	8.96147	8.85581	8.94912	8.79772	8.91308	8.97566	8.96883	9.31569	9.32369	9.12927
ENSG00000082512	5.34753	5.31361	5.20891	5.21608	5.05124	5.52896	4.9712	5.11926	5.34133	4.34436	5.44498	5.32658	5.01391	5.26247	5.39977	5.51302	5.17671	5.44834	5.44892	5.81652	6.35285	6.21904	6.28906
ENSG00000082515	8.55446	8.59349	8.60992	8.5701	8.5995	8.80872	8.57621	8.66191	8.61564	8.81904	8.6995	8.57112	8.53002	8.66364	8.64316	8.66498	8.51091	8.61319	8.4995	8.67197	8.45671	8.37886	8.37737
ENSG00000082516	8.66239	8.55218	8.65774	8.54796	8.60695	8.82249	8.50047	8.63918	8.52889	8.67877	8.38614	8.55036	8.67253	8.87869	8.69061	8.48902	8.62374	8.68715	8.62793	8.612	8.64999	8.69117	8.53848
ENSG00000082556	9.26819	9.16812	9.23837	9.35207	9.41856	9.2393	9.37431	9.29618	9.3519	9.35765	9.41778	9.25959	9.35863	9.28115	9.33289	9.18881	9.20748	9.23705	9.21259	9.30393	8.92303	8.81281	8.78608
ENSG00000082641	12.2392	12.3277	12.3037	12.381	12.409	12.3736	12.3993	12.3215	12.352	12.3257	12.3864	12.403	12.3908	12.3211	12.3633	12.3079	12.3463	12.3357	12.2696	12.237	12.4354	12.5045	12.4453
ENSG00000082701	10.6271	10.6342	10.5685	10.7174	10.5854	10.55	10.5846	10.663	10.5422	10.5763	10.557	10.6603	10.6779	10.6855	10.4764	10.5519	10.575	10.4019	10.4292	10.5376	10.6013	10.6467	10.5608
ENSG00000082781	10.8715	10.7555	10.8027	10.7346	10.7101	10.672	10.7216	10.8169	10.8485	10.7291	10.7982	10.7559	10.7734	10.8939	10.7713	10.8493	10.7564	10.9235	10.8146	10.8718	11.2474	11.1242	11.0895
ENSG00000082805	9.93647	9.76837	9.86457	9.87649	9.77026	9.76849	9.83121	9.73883	9.69755	9.89021	9.91004	9.76936	9.86921	9.81249	9.81018	9.69904	9.66356	9.76317	9.77039	9.82643	9.94883	10.0904	9.97928
ENSG00000082898	11.0395	10.9798	10.9604	11.0103	11.0731	11.1036	11.0111	11.0115	11.0545	11.0103	10.9474	11.123	11.0485	11.0913	11.1641	11.1035	11.2336	11.2273	11.291	11.3237	11.1786	11.304	11.2232
ENSG00000082996	8.98859	9.03451	9.07423	9.09775	9.24545	9.13829	9.03573	9.11866	9.22218	9.08155	9.12223	9.25446	9.06418	9.1363	9.30013	9.01559	9.24194	8.98395	8.88488	9.03629	9.27487	9.3632	9.21878
ENSG00000083067	4.21116	4.16687	3.82432	4.67783	3.91348	4.62421	4.43339	4.24289	4.63999	4.65201	3.57141	4.75948	4.18349	4.11236	4.14647	4.48295	4.29895	4.48101	3.9978	4.28186	1.98648	2.28335	2.36053
ENSG00000083093	7.51749	7.43498	7.61361	7.34911	7.48275	7.51385	7.47397	7.48609	7.45792	7.71581	7.15524	7.57079	7.43213	7.59034	7.6061	7.55765	7.57846	7.55332	7.5271	7.54261	7.45778	7.36638	7.49904
ENSG00000083097	8.93105	9.11237	9.15642	9.12418	9.02941	9.02669	9.06524	8.93807	8.9791	9.02473	8.96538	9.20484	8.96852	9.12396	9.06231	9.00745	8.96887	9.13316	9.09701	9.28485	8.62855	8.72849	8.65407
ENSG00000083099	9.02139	9.10921	9.02647	9.04736	9.05689	9.05614	9.04168	8.9256	9.09344	8.84452	9.08064	9.05074	8.98299	9.10651	9.01339	9.01829	8.94654	8.99648	9.05018	9.08122	9.27659	9.20767	9.1132
ENSG00000083123	8.42806	8.45092	8.56716	8.52548	8.64367	8.65168	8.87173	8.50319	8.50015	8.52968	8.66121	8.5036	8.52607	8.71061	8.43138	8.45748	8.43506	8.20569	8.23129	8.21956	7.42084	7.35279	7.62528
ENSG00000083168	9.99048	9.90955	9.82463	10.085	9.95688	9.89611	9.94987	10.0019	9.93689	9.9407	9.91301	9.8916	9.96563	10.0105	9.82088	9.8883	9.91911	9.88265	9.80582	10.0183	9.78408	10.0115	9.93831
ENSG00000083223	9.35568	9.36122	9.28985	9.17562	9.20672	9.31921	9.31167	9.32731	9.33108	9.21647	9.30039	9.36084	9.30895	9.33995	9.39389	9.34345	9.29338	9.46737	9.41287	9.32484	9.59391	9.62021	9.56308
ENSG00000083290	8.87473	8.94159	8.81502	9.09011	9.05144	9.10486	8.96235	8.93807	8.96414	8.98404	8.99367	9.07421	8.95391	9.0239	8.97558	9.01017	8.88415	8.91308	9.00959	9.08612	8.64732	8.66667	8.67612
ENSG00000083307	6.71374	6.40255	6.41379	6.35793	5.2548	5.9106	5.60645	6.1635	5.86372	6.58432	5.98545	6.24788	6.29958	6.29729	6.24102	6.35035	6.61053	6.44397	6.34198	6.31147	6.9961	6.99857	6.85932
ENSG00000083312	11.5002	11.4404	11.416	11.4199	11.3881	11.4371	11.4339	11.4743	11.4209	11.4252	11.2964	11.4756	11.4583	11.5315	11.4445	11.3418	11.4576	11.41	11.3221	11.4584	11.5165	11.6817	11.6047
ENSG00000083444	11.436	11.4678	11.438	11.3213	11.2849	11.3314	11.3143	11.3304	11.3776	11.3936	11.4518	11.4639	11.4317	11.4208	11.3086	11.3439	11.3322	11.3816	11.3447	11.2954	11.1553	11.036	11.0739
ENSG00000083454	4.21116	4.54631	4.30362	4.00161	4.40384	4.00518	4.8254	3.94779	4.32648	4.48268	4.32223	4.11483	3.75205	2.82518	3.75477	4.0652	4.09602	3.8124	4.59275	4.41261	3.37427	3.10382	3.29104
ENSG00000083457	7.26701	7.25215	7.25591	7.36185	7.17694	7.49677	7.30616	7.37128	7.35163	7.21984	7.2521	7.0851	7.34518	7.43917	7.50355	7.44961	7.41155	7.18891	7.29229	7.49912	6.64746	6.86132	7.04397
ENSG00000083520	9.38622	9.30153	9.30794	9.30664	9.50889	9.3119	9.35771	9.41687	9.57299	9.32181	9.44671	9.54634	9.47172	9.49557	9.45011	9.39012	9.45573	9.40769	9.38729	9.42892	9.52306	9.79371	9.79232
ENSG00000083535	7.25603	7.33026	7.14398	7.36185	7.39933	7.24389	7.26606	7.38045	7.7436	6.92728	7.43651	7.56252	7.40659	7.41506	7.54717	7.5276	7.28509	7.52479	7.57321	7.59862	7.46384	7.68113	7.62023
ENSG00000083544	7.81557	7.87548	7.84049	7.56289	7.72812	7.51385	7.42017	7.65418	7.32379	7.6009	7.48514	7.5542	7.80219	7.65352	7.64676	7.44157	7.77223	7.75346	7.75922	7.84428	7.46988	7.66472	7.746
ENSG00000083635	7.10507	7.14508	7.06059	6.8107	6.74846	6.90918	7.16064	7.16076	6.79831	6.78715	6.80552	6.95212	7.29948	7.05837	7.31406	7.40799	7.27489	7.12192	7.21376	6.93999	7.13942	7.02435	7.08849
ENSG00000083642	9.16628	9.21299	9.19365	9.18282	9.29014	9.38102	9.25133	9.25443	9.39267	9.2397	9.26833	9.34164	9.15132	9.27447	9.16946	9.25679	9.27558	9.13316	9.23427	9.18548	8.92742	8.91577	8.93369
ENSG00000083720	5.57667	5.35691	5.2758	5.27117	5.81429	4.90879	5.20125	5.59907	5.34133	5.12095	5.5091	5.36513	5.47346	4.94093	5.50968	5.28052	5.71851	5.63075	5.52127	5.05708	7.32413	7.43893	7.57401
ENSG00000083750	7.48022	7.46497	7.35205	7.52939	7.39933	7.32355	7.42017	7.37128	7.42335	7.44973	7.21413	7.29936	7.41515	7.50916	7.37391	7.63015	7.53637	7.23894	7.38569	7.49175	6.63676	6.96323	6.87635
ENSG00000083799	9.34276	9.33168	9.50205	9.28338	9.29707	9.22382	9.3385	9.18814	9.2471	9.28134	9.24968	9.52308	9.25751	9.33354	9.19437	9.25221	9.30345	9.08316	8.96056	9.03121	9.16933	9.44073	9.48196
ENSG00000083807	6.24336	6.57746	6.62096	6.63493	7.01823	6.46137	6.71585	6.30496	6.44902	6.60832	6.75353	6.22709	6.61412	6.46322	6.3034	6.20601	6.61053	6.35602	6.0145	6.09488	6.15712	5.4187	5.91354
ENSG00000083812	7.11508	7.08326	7.00439	7.01348	6.58033	6.74153	6.64789	6.92636	6.97051	7.27094	7.18479	7.11595	6.9198	6.97969	7.13504	6.97844	7.0657	7.08925	7.09529	7.05816	7.07153	6.98242	6.98858
ENSG00000083814	6.99047	7.35182	7.17059	6.79386	7.16688	7.14868	7.01097	6.63093	6.91487	7.03744	7.30724	7.28937	7.09107	7.10934	7.10873	7.17698	7.13525	6.84566	6.96922	7.04451	6.69979	6.52805	6.57637
ENSG00000083817	6.57921	6.64887	6.56856	6.65578	6.53054	6.76226	6.38243	6.76291	6.6567	6.72266	6.84332	6.45867	6.4065	6.50949	6.85475	6.79079	6.74965	6.62689	6.45712	6.70504	6.32646	6.21904	6.16982
ENSG00000083828	6.03093	6.20347	6.17585	6.13846	6.05135	6.16963	6.28687	6.24602	6.07887	5.92004	6.07861	6.46401	6.02447	5.84691	6.21961	6.18691	5.77752	6.343	6.53234	6.48034	6.39155	6.30709	6.41676
ENSG00000083838	6.71277	6.61361	6.68918	6.457	6.49659	6.70005	6.678	6.55753	6.5245	6.93793	6.6894	6.99184	6.55878	6.60479	6.35241	6.63277	6.63403	6.67556	6.83638	6.5442	6.63386	6.7396	6.67221
ENSG00000083844	8.50893	8.46583	8.45977	8.37013	8.45412	8.4623	8.3599	8.20099	8.50842	8.54219	8.41152	8.53353	8.44477	8.44695	8.45447	8.37127	8.33058	8.38463	8.56372	8.29354	7.93038	8.1661	8.17893
ENSG00000083845	11.6835	11.7114	11.733	11.5432	11.6581	11.7321	11.6601	11.6848	11.5725	11.677	11.743	11.6671	11.6419	11.7117	11.6758	11.704	11.6704	11.7444	11.6326	11.6071	12.1373	12.0126	12.0978
ENSG00000083857	12.6515	12.4392	12.5387	12.5278	12.4135	12.3965	12.3638	12.5348	12.4086	12.4211	12.3441	12.5444	12.5894	12.6301	12.4824	12.4735	12.4985	12.5101	12.3722	12.4983	12.59	12.7466	12.5662
ENSG00000083896	10.1606	10.1623	10.0799	10.0675	10.2538	10.119	10.1614	10.1174	10.1501	10.1349	10.1158	10.1397	10.1793	10.1703	10.2149	10.1864	10.2076	10.0541	10.0848	10.1483	10.0102	10.1027	10.0513
ENSG00000083937	8.89257	8.87613	8.95427	8.9367	9.06504	8.81906	9.09702	9.00772	9.17361	8.99773	8.93944	8.90462	8.92422	9.2314	9.07429	8.91761	9.25497	9.0694	9.02419	8.98468	9.6063	9.62728	9.70208
ENSG00000084070	9.11857	9.19819	9.27357	9.20421	9.41432	9.47777	9.26665	9.28647	9.3747	9.46668	9.41986	9.2647	9.4002	9.36324	9.24027	9.26137	9.25237	9.214	9.19426	9.16244	9.16375	9.03119	9.04707
ENSG00000084072	8.64985	8.72736	8.68875	8.67596	8.84309	8.80178	8.7449	8.90034	8.67194	8.94216	8.81497	8.95919	8.90914	8.77201	8.90358	8.97441	8.83985	8.95645	8.94078	8.83824	8.83919	8.84714	8.8987
ENSG00000084073	9.80324	9.79025	9.73237	9.81061	9.93038	9.89448	9.90651	9.87147	9.73678	9.85804	9.91744	9.68805	9.79406	9.99838	9.71204	9.85994	9.86403	9.89384	9.76915	9.87685	10.138	10.1836	10.2075
ENSG00000084090	10.8706	10.8409	10.8652	10.9098	10.9678	10.9387	10.9936	10.9559	10.8518	11.0393	10.8732	11.0195	10.8824	10.9523	10.9782	10.8712	10.9395	10.8712	10.8128	10.8775	10.6258	10.6007	10.5569
ENSG00000084092	8.5855	8.40525	8.57382	8.62928	8.60695	8.49707	8.62062	8.51155	8.61946	8.59118	8.82445	8.77459	8.63271	8.60091	8.53466	8.70916	8.51525	8.80097	8.72047	8.56357	8.73771	8.67215	8.62414
ENSG00000084093	9.52764	9.43125	9.45952	9.44184	9.39507	9.49937	9.41613	9.50539	9.40158	9.23585	9.35156	9.55053	9.49815	9.5146	9.46384	9.54816	9.38872	9.43707	9.36944	9.41339	9.30221	9.39006	9.39454
ENSG00000084110	3.198	4.16687	3.63345	4.08022	2.0053	3.41682	3.27447	3.52973	4.05385	3.41368	4.23392	3.56915	4.10098	3.26713	3.13716	3.54607	4.21606	3.90457	3.77919	4.58888	6.06436	6.14211	5.94616
ENSG00000084112	10.6324	10.434	10.5801	10.4646	10.4828	10.3694	10.2693	10.4001	10.4825	10.2689	10.4178	10.3693	10.4385	10.4329	10.2784	10.2963	10.326	10.3337	10.3773	10.3966	10.7099	10.8234	10.6795
ENSG00000084207	12.2312	12.2317	12.2924	12.2801	12.2884	12.2834	12.3513	12.3188	12.253	12.2812	12.3611	12.2212	12.2852	12.3189	12.3086	12.4028	12.3236	12.462	12.3874	12.2323	12.3124	12.1754	12.1277
ENSG00000084234	13.1237	13.1168	13.1708	13.1436	13.1445	13.062	13.1421	13.1439	13.1443	13.0985	13.1339	13.1391	13.1404	13.2125	13.14	13.1284	13.0789	13.105	12.9731	13.0171	13.1772	13.1535	13.1103
ENSG00000084444	6.41117	6.31744	6.47201	6.5923	6.25489	6.49617	6.36355	6.30496	6.44902	6.53509	5.84345	6.26836	6.20399	6.39912	6.3034	6.20601	6.30438	5.95542	6.55227	6.22514	6.0483	6.21904	6.12777
ENSG00000084453	2.50398	4.06612	1.86121	4.08022	3.81391	2.0795	4.11005	2.64953	2.63293	3.41368	3.6868	1.06137	3.33486	3.52913	4.14647	2.9629	3.58383	3.67459	3.31982	3.97836	2.23369	3.36224	2.36053
ENSG00000084463	9.90869	9.96831	9.91528	9.86534	9.91994	9.89121	9.94353	9.87472	9.9657	9.88776	9.96965	9.86662	9.97724	10.0888	9.93364	9.9291	9.97532	9.86113	9.8345	9.98457	9.80692	9.73989	9.82228
ENSG00000084623	10.5991	10.4934	10.59	10.6133	10.5228	10.5091	10.5537	10.5769	10.4899	10.4787	10.6264	10.4319	10.482	10.5473	10.4944	10.5602	10.5285	10.6768	10.5701	10.5545	11.1407	11.1431	11.1211
ENSG00000084628	4.21116	4.06612	3.82432	3.27513	4.09411	3.55525	3.56627	3.39154	2.36801	3.17748	4.23392	4.2009	3.47249	3.64421	3.9525	3.54607	4.52238	4.61696	4.68425	4.28186	4.39219	4.50215	4.80123
ENSG00000084636	4.5357	5.31361	5.20891	4.97191	5.09431	4.95954	5.36207	4.82924	4.63999	4.45436	4.74065	4.75948	5.1014	4.94093	4.79367	5.84089	5.657	5.81167	6.14235	6.15215	6.86474	6.54009	6.86786
ENSG00000084652	10.792	10.896	10.7949	10.8397	10.8047	10.8363	10.9	10.7999	10.7912	10.8722	10.8424	10.8379	10.8006	10.7806	10.7713	10.7641	10.6984	10.8228	10.7727	10.83	10.9589	10.906	10.8696
ENSG00000084674	16.9839	17.0743	17.0268	17.2266	17.3318	17.4239	17.3656	17.2297	17.1577	17.242	17.2139	17.237	17.2468	17.2226	17.1099	17.0474	17.0654	16.9029	16.8669	16.9156	15.8983	15.8835	15.8706
ENSG00000084676	9.51157	9.50527	9.45772	9.60351	9.50889	9.47341	9.5028	9.54056	9.52897	9.534	9.33838	9.55053	9.5593	9.44289	9.49758	9.53122	9.52839	9.39355	9.36617	9.46138	9.46679	9.37165	9.42234
ENSG00000084693	8.18915	8.12753	8.24702	8.2857	8.24544	8.23398	8.19884	8.32007	8.13931	8.10122	8.24265	8.11979	8.2764	8.25206	8.09176	8.26144	7.98119	7.92919	7.95477	7.98227	7.89939	7.63134	7.63532
ENSG00000084710	4.7387	4.65714	4.51996	4.50476	3.70696	4.80159	4.28076	4.16018	4.05385	4.45436	4.15596	4.36209	4.8212	4.26402	4.05274	4.65962	4.21606	4.43269	4.64161	4.13808	4.9712	4.85051	4.48332
ENSG00000084731	8.09982	7.8454	8.15228	7.89649	7.80793	7.68195	7.54271	7.83834	7.99378	7.72681	7.83077	7.82013	7.89694	7.96159	7.70953	7.80945	7.69782	7.70851	7.64513	7.62583	8.57351	8.66392	8.58065
ENSG00000084733	10.7447	10.6397	10.7211	10.7322	10.7761	10.6974	10.6707	10.6564	10.672	10.6576	10.7089	10.6985	10.6537	10.8293	10.7083	10.7601	10.8709	10.842	10.7546	10.8937	11.1197	11.2339	11.1437
ENSG00000084734	7.78534	7.78328	7.7315	7.82465	7.78181	7.95011	7.98699	7.65418	7.73658	7.6595	7.68573	7.77072	7.91516	7.66719	7.86927	7.87059	7.96224	8.14325	8.19119	8.37999	8.54804	8.4283	8.66391
ENSG00000084754	11.1992	11.3081	11.2037	11.314	11.4296	11.4202	11.422	11.3179	11.3276	11.4378	11.3273	11.3394	11.3658	11.3205	11.3318	11.3472	11.3596	11.3269	11.2428	11.2578	11.1955	11.2574	11.2715
ENSG00000084764	7.65762	7.42484	7.35978	7.33625	7.46645	7.36178	7.51731	7.24654	7.53279	7.48903	7.57025	7.47709	7.57652	7.29691	7.67849	7.69919	7.82912	7.66734	7.55609	7.46186	7.54046	7.79607	7.84879
ENSG00000084774	9.99214	10.0904	10.0432	9.92023	10.1325	9.98912	9.9467	9.95358	9.98064	10.0888	10.0364	9.92101	9.94656	9.85642	10.0136	9.94908	9.94025	10.1186	9.97207	10.0526	10.2272	10.0245	10.0363
ENSG00000085063	11.8912	11.7613	11.8307	11.5879	11.703	11.6663	11.6377	11.7819	11.7849	11.7191	11.6403	11.7729	11.6678	11.8048	11.7015	11.6436	11.7628	11.6385	11.5326	11.6312	11.6311	11.7102	11.6492
ENSG00000085117	7.02969	7.67626	7.00301	7.48347	7.56926	7.37119	7.41101	7.37128	7.30493	7.29569	7.48514	7.27931	7.50613	7.4707	7.36418	7.19621	7.24384	7.30754	7.08514	7.06454	7.4759	7.65921	7.49904
ENSG00000085185	9.34016	9.30706	9.37623	9.3899	9.15933	9.37402	9.37901	9.25692	9.2909	9.36823	9.4115	9.29247	9.49007	9.35903	9.47517	9.42518	9.28578	9.39198	9.35136	9.20591	9.23641	9.17715	9.22377
ENSG00000085224	10.4444	10.3319	10.3217	10.415	10.3547	10.4348	10.2756	10.5107	10.4646	10.3459	10.3173	10.3963	10.3609	10.4025	10.2951	10.3477	10.3148	10.183	10.2041	10.3017	9.89148	10.0148	10.0268
ENSG00000085231	8.02901	7.94933	7.96399	7.82594	7.70524	7.89589	7.8544	7.9186	7.89393	8.13043	7.77423	7.97024	7.87891	7.97973	7.88839	7.97994	7.98138	8.0372	7.89349	7.99969	7.90064	7.82903	7.96187
ENSG00000085274	8.18336	7.9761	7.95207	8.36381	8.19686	8.15996	8.20415	8.27656	8.28118	7.98688	7.84326	8.31461	8.09112	8.2879	8.15515	7.96331	8.25992	8.13194	8.1192	8.32709	8.119	8.26737	8.23611
ENSG00000085276	5.50426	4.78944	5.45968	4.19863	5.00684	4.62421	4.69737	4.07244	5.00975	4.55657	4.5708	5.11663	5.26191	5.29805	5.10516	4.714	4.29895	5.02811	5.14747	4.93185	6.75029	6.7308	6.76189
ENSG00000085365	9.13365	8.87241	8.84837	8.87135	8.82082	8.95346	8.93384	8.98086	8.77834	8.92793	8.81497	8.97174	8.82168	9.0658	8.91694	9.02638	9.0125	9.02527	8.82897	8.96617	8.94704	9.10601	9.06017
ENSG00000085377	9.32184	9.25078	9.29389	9.23571	9.25022	9.26979	9.20436	9.28158	9.31231	9.22813	9.28445	9.27486	9.214	9.2767	9.3698	9.39429	9.39579	9.25627	9.1088	9.26336	8.89861	8.8227	9.05082
ENSG00000085382	6.69759	6.82878	7.23924	7.11319	7.0514	7.04675	7.1049	6.73461	6.93954	7.08951	6.76671	7.01409	6.85972	7.00553	7.06139	7.05586	6.84927	6.85486	6.92546	7.08429	7.06156	7.09968	7.18048
ENSG00000085415	8.80861	8.77203	8.88096	9.03547	9.03219	8.93456	9.03573	8.98387	8.8933	8.96558	8.95103	8.9144	8.85668	9.104	9.0472	8.96603	9.04589	8.98814	8.83371	9.07136	8.97492	8.93414	8.97182
ENSG00000085433	6.95015	6.84407	7.11686	6.63493	7.10504	6.91151	6.62366	7.13186	7.01111	7.12321	6.95112	6.98962	7.24308	6.99473	7.02483	6.81587	7.02999	6.62689	7.06107	6.83897	6.71003	6.84199	6.69628
ENSG00000085449	9.79711	9.83698	9.81482	9.83138	9.89884	10.1176	9.95503	9.83194	9.87581	9.82479	9.8861	9.81437	9.8312	9.92088	9.92835	9.87493	9.93804	9.81475	9.82262	9.88087	9.93906	10.0086	10.029
ENSG00000085465	8.71547	8.77203	8.50578	8.52548	8.76193	8.81217	8.84476	8.70631	8.78175	8.99318	8.78938	8.6898	8.68675	8.48989	8.61474	8.7258	8.71712	8.62668	8.81225	8.54943	8.29941	8.17771	8.16167
ENSG00000085491	9.20962	9.06747	9.15863	9.06305	8.89274	8.99966	8.90148	9.07135	8.9551	8.87452	8.94235	9.02689	9.08579	9.236	8.97877	9.05035	9.15003	9.09873	9.1455	8.95548	9.7005	9.77344	9.66336
ENSG00000085511	9.41613	9.64062	9.57525	9.64842	9.68829	9.66526	9.6677	9.57289	9.60419	9.69673	9.69776	9.6259	9.64552	9.54269	9.60879	9.54441	9.69642	9.42786	9.47491	9.53858	9.16188	9.27227	9.21376
ENSG00000085514	4.22294	3.43801	3.91105	3.48543	4.11015	4.6442	4.20134	3.40453	4.65019	3.41368	3.90172	3.81958	3.49463	3.26713	3.95872	4.05933	3.71519	2.9423	4.6943	4.22036	2.95235	1.73155	2.5592
ENSG00000085552	3.37086	3.24503	2.6476	3.95122	3.00618	3.68155	2.6832	3.39154	3.22103	2.54308	3.79363	3.69556	3.92029	2.53429	2.94184	2.77102	2.92492	3.29673	2.45752	2.70834	1.31112	2.03367	2.15262
ENSG00000085563	5.12414	3.84069	4.00711	4.40975	4.70723	3.90516	3.56627	4.32111	3.64845	4.45436	4.37824	4.36209	4.3535	4.82715	4.33107	4.13622	4.65416	4.22139	3.52142	4.41261	7.48785	7.6257	7.56879
ENSG00000085644	7.28873	7.20554	7.23084	7.08272	6.97279	6.68896	6.84396	7.18512	7.09036	7.21984	7.14519	6.97723	7.00293	7.06871	6.94881	7.09738	6.83545	7.15208	6.97782	6.85055	7.12418	7.30418	7.37273
ENSG00000085662	10.4212	9.86526	10.378	9.93736	9.74852	9.49292	9.67729	10.021	9.98805	9.67985	9.69776	9.82401	9.76253	10.1834	9.58806	9.76008	9.86403	9.58119	9.57462	9.61526	9.90045	10.0266	10.092
ENSG00000085719	10.7109	10.7196	10.7196	10.7371	10.8525	10.8757	10.8551	10.8386	10.7612	10.7602	10.769	10.865	10.7998	10.9113	10.804	10.6948	10.8743	10.7769	10.7037	10.7764	10.5473	10.4972	10.5275
ENSG00000085721	9.69811	9.57989	9.66499	9.64704	9.5894	9.63955	9.52601	9.54437	9.71092	9.53087	9.52898	9.62923	9.67501	9.60009	9.7433	9.73079	9.68759	9.56441	9.74385	9.69542	9.63433	9.66648	9.69749
ENSG00000085733	11.793	11.7067	11.7588	11.6976	11.5674	11.6563	11.675	11.6691	11.7187	11.6607	11.6466	11.7564	11.7252	11.6901	11.8201	11.8143	11.7953	11.9935	11.9629	11.9633	12.5064	12.4405	12.4512
ENSG00000085760	9.06923	9.09009	9.09058	9.18995	9.21404	9.20553	9.16946	9.20886	9.2909	9.25118	9.24027	9.18342	9.18926	9.17987	9.26137	9.25908	9.2048	9.23881	9.18501	9.14374	9.23818	9.18292	9.11139
ENSG00000085788	9.21814	9.16812	9.11591	9.12418	9.35578	9.2823	9.21229	9.18553	9.10983	9.00226	9.22364	9.22594	9.14361	9.03713	9.21344	9.17434	9.24716	9.18877	9.18872	9.23271	9.14122	9.15382	9.21376
ENSG00000085831	7.75445	7.85298	7.57429	7.81542	7.75522	7.48815	7.73124	7.73498	7.7153	7.56457	7.46911	7.8746	8.0143	7.75304	8.03162	7.85252	8.02446	8.3878	8.36835	8.2106	9.23995	9.30792	9.21878
ENSG00000085832	9.66684	9.67738	9.72491	9.74887	9.78677	9.83456	9.91626	9.73168	9.78352	9.70788	9.76987	9.78721	9.79077	9.89469	9.78672	9.89273	9.80676	9.92146	9.92729	9.93103	9.73476	9.7516	9.76971
ENSG00000085840	5.12414	4.72481	5.24274	4.90382	4.32864	4.80159	4.92043	5.32309	5.00975	5.36584	4.84371	5.11663	4.87184	4.58533	4.60844	5.12864	5.13219	5.65201	5.23612	5.09652	5.2492	5.03202	5.30739
ENSG00000085871	9.49765	9.50527	9.47562	9.59813	9.71095	9.68989	9.67729	9.71729	9.63094	9.60131	9.63808	9.55053	9.63089	9.57205	9.78672	9.5942	9.61788	9.49998	9.53294	9.41144	8.75265	8.54345	8.72159
ENSG00000085872	10.0677	10.1237	10.1673	10.1833	10.0014	9.94879	10.0239	10.0643	10.1448	9.99176	10.1106	10.1102	10.1868	10.1337	10.1385	10.1731	10.0654	10.1826	10.2121	10.1751	10.1178	10.1786	10.1128
ENSG00000085978	9.31657	9.2904	9.36282	9.41151	9.49288	9.45584	9.28432	9.21143	9.5023	9.32544	9.37541	9.39851	9.39588	9.40055	9.42695	9.38803	9.51328	9.42631	9.42235	9.58091	9.41608	9.40825	9.37819
ENSG00000085982	10.0184	10.0464	10.0396	10.0558	10.109	10.1494	10.1184	10.0925	10.0838	10.2192	10.1171	10.1741	10.1526	10.0976	10.1228	10.1498	10.1654	10.1775	10.2159	10.0651	10.1764	10.1643	10.0153
ENSG00000085998	9.97382	9.95428	9.85639	9.95218	9.81602	9.76136	9.73351	9.94742	9.82218	9.95948	9.89961	9.84633	9.98876	9.84744	9.87494	9.84326	9.97532	10.0034	9.83686	9.89094	9.97242	9.93038	9.89615
ENSG00000085999	4.5357	3.71322	4.34409	3.80955	3.00618	3.09234	3.10297	3.87912	3.96051	4.74153	3.446	3.43059	3.92029	4.26402	4.79367	3.76795	4.12811	3.90457	4.40716	3.69977	4.17276	3.56445	1.25007
ENSG00000086015	10.2698	10.2366	10.1574	10.3104	10.1208	10.1951	10.1463	10.2395	10.2594	10.1777	10.2844	10.1929	10.2997	10.2496	10.3392	10.303	10.3086	10.5754	10.6156	10.5607	10.8668	10.7207	10.6904
ENSG00000086061	11.5494	11.4144	11.4777	11.4267	11.4838	11.4275	11.4111	11.506	11.5502	11.442	11.4261	11.5417	11.4645	11.5747	11.6395	11.4782	11.6371	11.562	11.5947	11.6185	11.7571	11.7425	11.8329
ENSG00000086062	12.0937	12.1235	12.0967	12.1214	12.2153	12.2158	12.1805	12.2054	12.1295	12.1922	12.1922	12.1279	12.131	12.0782	12.0812	12.0771	12.1089	12.0935	11.9934	11.9646	11.9636	11.9777	11.9316
ENSG00000086065	8.90668	8.79582	8.92067	8.79352	8.82403	8.8829	8.99031	9.02536	9.06289	8.94688	8.94235	8.96234	8.90611	9.16309	8.97877	9.22905	9.08144	8.97765	8.98208	9.00295	9.28003	9.48189	9.43245
ENSG00000086102	9.42841	9.51007	9.57193	9.52918	9.52078	9.68989	9.57842	9.51166	9.62145	9.62209	9.62548	9.70693	9.64369	9.53525	9.57337	9.63529	9.69068	9.74844	9.7366	9.70889	9.53608	9.66626	9.70566
ENSG00000086189	7.96469	7.71837	7.846	7.93964	7.81438	7.81882	7.87813	7.90336	7.6345	7.93089	7.9965	7.8679	7.73539	8.04773	7.72481	7.75213	7.9749	7.77784	7.95912	7.94494	8.04406	8.2195	8.17205
ENSG00000086200	8.42806	8.20065	8.44894	8.43188	8.53842	8.47544	8.29164	8.28146	8.54907	8.39821	8.42093	8.5036	8.33172	8.59735	8.71521	8.56865	8.5871	8.55623	8.21683	8.53515	8.62584	8.71527	8.64992
ENSG00000086232	11.1548	11.1776	11.1506	11.314	11.2674	11.2992	11.2649	11.2218	11.1918	11.2254	11.2879	11.2463	11.2635	11.2075	11.257	11.2395	11.2545	11.169	11.1673	11.2035	11.2928	11.3168	11.3784
ENSG00000086289	8.75891	8.57069	8.6388	8.40133	8.51879	8.53522	8.53462	8.62769	8.52074	8.60913	8.3904	8.5036	8.73542	8.67722	8.76638	8.84331	8.69051	8.87516	8.68416	8.79694	7.95212	8.01466	7.87867
ENSG00000086300	7.16502	7.41463	7.04197	7.20093	7.15676	7.24389	7.17154	7.31505	7.32379	6.88862	7.07279	7.02617	7.48188	7.43917	7.42156	7.17698	7.49302	7.23894	7.35302	7.37632	7.78777	7.88846	7.78709
ENSG00000086475	9.62049	9.69224	9.78068	9.65361	9.77689	9.65374	9.68301	9.65069	9.72619	9.75163	9.67523	9.73296	9.65637	9.7751	9.75731	9.71412	9.67718	9.76072	9.65988	9.68967	9.36027	9.40166	9.36468
ENSG00000086504	9.76113	9.96656	9.74423	9.8456	9.7502	9.79668	9.88018	9.7563	9.91529	9.63382	9.88374	9.72372	9.83132	9.78767	9.74425	9.80775	9.66356	9.76824	9.70088	9.65046	9.71219	9.54451	9.57758
ENSG00000086544	9.43085	9.29319	9.45231	9.3899	9.35356	9.30701	9.32148	9.3344	9.46668	9.30356	9.33838	9.35607	9.46761	9.4249	9.51306	9.52553	9.38872	9.52468	9.5732	9.5005	9.76823	9.95645	9.86129
ENSG00000086589	9.1216	9.14052	9.20443	9.22529	9.1944	9.17096	9.15031	9.07417	9.25449	9.35055	9.09115	9.23378	9.1742	9.20118	9.2692	9.11494	9.28832	9.30237	9.2521	9.21041	9.1841	9.08972	9.18671
ENSG00000086598	12.1783	12.1697	12.2173	12.2517	12.3767	12.3078	12.3597	12.2703	12.3265	12.3112	12.3284	12.2427	12.2572	12.3251	12.2898	12.2693	12.322	12.1984	12.1646	12.185	12.543	12.5638	12.6037
ENSG00000086619	8.06878	7.85298	7.75514	7.92254	7.86501	7.72659	7.87813	7.79788	7.7436	7.70472	7.92779	7.64318	7.76248	7.95603	7.8485	7.61594	7.84989	7.67255	7.39855	7.71722	7.56324	7.68656	7.67964
ENSG00000086666	9.60974	9.50527	9.51941	9.63009	9.64367	9.73062	9.76442	9.57087	9.56707	9.56805	9.64879	9.60186	9.54767	9.69394	9.58178	9.65973	9.66745	9.54613	9.63834	9.50413	9.58559	9.63009	9.49028
ENSG00000086696	8.89611	8.81923	8.88632	8.97038	9.07044	8.90249	8.99645	9.02243	9.09069	9.21647	8.90411	8.99036	8.95097	9.0658	8.90358	9.06873	8.94975	8.89313	8.92099	8.83532	8.04406	7.69735	7.82706
ENSG00000086712	9.31127	9.49077	9.35318	9.30664	9.62544	9.37168	9.459	9.49699	9.49192	9.45018	9.38825	9.45098	9.4216	9.50321	9.59431	9.60862	9.60368	9.55321	9.50645	9.52238	9.55751	9.5814	9.70088
ENSG00000086730	4.38253	4.8513	4.51996	5.09915	4.09411	4.26934	5.11358	3.97901	3.96051	4.55657	5.23353	4.63878	4.26153	5.02828	4.23448	4.9131	4.88633	3.67459	4.98642	4.34872	3.4099	3.89967	2.36053
ENSG00000086758	12.2966	12.2922	12.2597	12.2964	12.2994	12.3227	12.2782	12.3926	12.2503	12.2586	12.27	12.3367	12.2879	12.3353	12.2342	12.18	12.1915	12.2488	12.1896	12.2239	12.2104	12.3662	12.255
ENSG00000086827	7.92363	8.09594	8.05088	7.95655	8.18694	7.92479	8.15009	8.03103	8.02293	8.10122	7.85564	7.99011	8.02553	8.12902	8.05598	7.93497	8.13011	8.03007	7.96345	8.03397	8.19754	8.30315	8.47841
ENSG00000086848	8.9919	8.94159	8.89374	9.03547	8.83359	8.94719	8.87839	8.90034	9.00053	8.93488	8.90709	8.89147	8.86295	8.89039	9.1038	8.9205	9.119	8.94788	8.98801	9.01587	9.00697	8.99227	8.9738
ENSG00000086991	3.00157	3.57338	4.62633	4.59389	4.53031	4.34764	3.56627	4.32111	3.22103	4.22527	3.57141	4.43639	3.59813	4.46525	4.60844	4.20771	4.12811	3.83191	4.30156	4.21176	3.98308	3.74177	3.41275
ENSG00000087008	8.72346	8.71909	8.51965	8.85341	8.56163	8.65168	8.79278	8.62383	8.63842	8.81904	8.66121	8.65521	8.73542	8.59377	8.68671	8.6753	8.69816	8.80334	8.54649	8.63562	8.59578	8.46666	8.33797
ENSG00000087053	8.68303	8.57069	8.6388	8.67085	8.58069	8.5642	8.5304	8.58076	8.5886	8.38437	8.48908	8.59159	8.62165	8.66364	8.71376	8.69909	8.6437	8.76727	8.72813	8.68497	9.38125	9.37501	9.29674
ENSG00000087074	10.0584	9.90591	10.0834	9.73424	9.52472	9.35992	9.43885	9.68437	9.6138	9.53087	9.65057	9.74398	9.72687	9.90049	9.617	9.72244	9.88263	9.86568	9.8034	9.84681	10.6453	10.7929	10.8546
ENSG00000087076	7.23381	7.394	7.27238	7.24287	7.42487	7.52232	7.71643	7.45173	7.38794	7.43638	7.48514	7.37688	7.37182	7.50155	7.16581	7.2432	7.21211	7.09112	7.27844	7.14197	7.10101	6.79251	7.18048
ENSG00000087077	9.59238	9.51963	9.60645	9.51784	9.37774	9.3021	9.40232	9.49066	9.42579	9.62797	9.61094	9.21279	9.4799	9.44884	9.3867	9.47721	9.45347	9.46587	9.34639	9.36979	8.99181	8.91808	8.79953
ENSG00000087085	7.73084	7.92667	7.63288	7.64861	7.48275	7.61229	7.36429	7.55245	7.64204	7.38174	7.69953	7.4324	7.52207	7.55401	7.71719	7.90606	7.69782	7.73366	7.84629	7.76695	8.42597	8.44761	8.41282
ENSG00000087086	16.7015	16.7236	16.6789	16.7986	16.8293	16.7419	16.8495	16.837	16.8382	16.831	16.8225	16.8877	16.8392	16.8894	17.0414	16.9429	16.9339	17.1229	17.0595	17.031	17.1295	17.0064	17.0619
ENSG00000087087	10.5152	10.4466	10.4852	10.3794	10.4531	10.3753	10.4322	10.4608	10.5116	10.5013	10.5186	10.3799	10.3631	10.2966	10.3405	10.3358	10.3297	10.3646	10.4385	10.3667	10.2038	10.0646	10.2358
ENSG00000087088	10.9571	10.8551	10.9591	10.6987	10.6865	10.7507	10.7011	10.7827	10.8767	10.8282	10.88	10.837	10.8225	10.8224	10.7274	10.8054	10.7737	10.8836	10.9064	10.8271	10.9383	10.7973	10.8121
ENSG00000087095	8.4809	8.61594	8.38598	8.55907	8.36459	8.16537	8.31147	8.6468	8.39259	8.58514	8.35158	8.44631	8.28577	8.41083	8.47268	8.43337	8.43963	8.38463	8.41657	8.44636	8.55658	8.49168	8.4011
ENSG00000087111	9.17214	8.96626	9.13405	9.1864	8.98146	9.0503	9.12251	9.04277	8.9791	9.02473	9.08853	9.04185	8.96561	8.99438	9.05327	9.06873	9.0125	9.1103	8.99272	8.84404	9.0085	9.09993	8.93776
ENSG00000087152	10.3776	10.4072	10.4404	10.3494	10.3245	10.3682	10.2527	10.4801	10.33	10.3061	10.4146	10.4102	10.3158	10.4198	10.3479	10.3195	10.3734	10.3862	10.3083	10.3505	10.4536	10.3672	10.3927
ENSG00000087157	8.64985	8.68127	8.66711	8.60804	8.49889	8.52683	8.4566	8.56878	8.58078	8.63272	8.65414	8.52929	8.49813	8.68059	8.60239	8.66153	8.50219	8.51218	8.65766	8.61879	8.72514	8.62769	8.71923
ENSG00000087191	10.1158	9.96482	9.98316	10.008	9.9685	10.0779	10.0012	10.0841	10.0503	10.0586	10.1273	10.027	10.0587	10.0292	10.2054	10.1621	10.1375	10.1775	10.0838	10.1612	10.3087	10.281	10.2885
ENSG00000087206	8.11206	7.90495	8.05565	8.19601	7.93777	8.32872	7.9808	8.0712	8.09058	8.00507	8.11969	8.02665	7.8535	8.07363	8.21046	8.01838	8.03659	8.17664	8.32522	8.19706	8.38501	8.29606	8.45593
ENSG00000087253	4.38253	3.41853	4.51996	4.75716	3.91348	4.00518	4.63576	4.16018	3.05032	4.22527	2.79469	3.81178	4.18349	3.52913	4.14647	4.12984	3.9343	3.67459	3.8558	3.0671	3.98308	4.92588	4.65102
ENSG00000087263	9.67511	9.52676	9.60645	9.55993	9.64549	9.65374	9.56815	9.49488	9.58673	9.77302	9.63269	9.61993	9.63456	9.71219	9.8262	9.71078	9.88263	9.79816	9.84158	9.64382	9.58837	9.60882	9.72576
ENSG00000087266	10.8258	11.0097	10.9737	11.0977	11.0978	11.2426	11.2025	11.1263	10.9153	11.1517	11.1482	11.1265	11.1571	10.8376	11.1891	11.2072	11.0875	11.1397	11.2688	11.2518	10.3551	10.4525	10.4514
ENSG00000087269	9.43329	9.29598	9.30594	9.16475	9.24306	9.19233	9.24876	9.36473	9.29329	9.38569	9.27295	9.39385	9.34301	9.3527	9.41288	9.36059	9.26789	9.57285	9.44268	9.4481	9.66671	9.60596	9.66336
ENSG00000087274	11.9427	11.9655	11.9099	11.9495	11.9038	12.0093	12.0352	11.9833	11.9469	11.936	12.0065	11.9614	11.9528	11.9415	11.9383	11.9337	11.9159	11.9116	11.9215	11.9842	11.4751	11.5113	11.4591
ENSG00000087299	7.84519	7.78328	7.78415	7.92254	7.84623	7.96881	7.94315	7.66171	7.77135	7.62463	7.91601	7.95894	7.93316	7.68746	7.87613	7.75213	7.60313	7.78267	7.75922	7.7485	7.22047	7.00727	7.11024
ENSG00000087301	7.91668	8.3474	8.06985	8.1745	8.35133	8.49707	8.4787	8.36692	8.39259	8.48501	8.46907	8.03863	8.11759	8.15351	7.94948	7.9966	7.89055	7.72365	7.38569	7.59173	6.57085	6.33418	6.32671
ENSG00000087302	10.1518	10.092	10.1406	9.99781	10.0945	10.1273	10.0784	10.0078	10.1301	10.1036	10.078	10.0345	10.0965	10.0964	10.2628	10.1212	10.1291	10.1432	10.1716	10.1127	10.5749	10.5194	10.6458
ENSG00000087303	3.90857	2.54751	3.73204	3.65243	3.59143	2.40658	4.01647	3.65583	3.63764	3.17748	3.79363	3.43059	3.47249	4.40124	2.94184	3.54607	1.67722	3.58899	2.80535	2.22973	3.84118	3.82288	3.41275
ENSG00000087338	8.35273	8.27589	8.43803	8.15266	8.16691	8.14907	8.54723	8.29606	8.41914	8.28366	8.34281	8.54617	8.37186	8.51657	8.42671	8.50838	8.41662	8.28268	8.19856	8.28503	8.07609	8.1661	8.35021
ENSG00000087365	11.4547	11.4616	11.4417	11.4099	11.4085	11.4822	11.4513	11.4231	11.4411	11.488	11.519	11.4449	11.4763	11.3388	11.4166	11.526	11.4542	11.4797	11.4926	11.4451	11.5482	11.5109	11.4877
ENSG00000087448	8.95502	8.86868	8.95427	8.86689	8.80794	8.73416	8.84476	8.70995	9.02593	8.85459	8.73344	8.80646	9.09115	8.8933	8.99146	8.83719	8.98147	9.013	9.21804	9.12479	9.41764	9.28485	9.3556
ENSG00000087460	13.6621	13.6763	13.679	13.6897	13.6604	13.7367	13.707	13.673	13.6831	13.6636	13.7349	13.6709	13.6464	13.6636	13.6051	13.6322	13.6465	13.6663	13.5812	13.5802	13.8211	13.7395	13.7253
ENSG00000087470	10.267	10.1377	10.2128	10.2012	10.1981	10.1273	10.1545	10.2025	10.2272	10.1514	10.1388	10.1916	10.2682	10.2677	10.3577	10.1073	10.3023	10.2074	10.1763	10.3747	10.2111	10.2419	10.2571
ENSG00000087502	9.05979	9.08366	9.11819	9.12043	9.28084	9.10486	9.14479	9.14578	9.16318	9.12794	9.04323	8.98418	9.04775	9.21521	9.24822	9.06088	9.16668	9.1407	9.07314	9.05893	9.37804	9.45352	9.46799
ENSG00000087586	7.01608	6.94682	7.07004	6.95395	6.74846	6.71873	6.45556	6.51922	7.05693	6.48413	6.77846	6.67268	6.78241	7.04796	6.64546	6.92365	6.56101	6.9351	6.65232	6.92911	6.48887	6.58729	6.48983
ENSG00000087589	2.50398	3.71322	4.21367	4.19863	3.59143	4.09871	4.57141	2.87372	3.63764	4.22527	3.8931	2.91102	4.01346	4.19018	3.84477	2.9629	3.58383	2.92982	3.69828	4.53248	2.44467	2.28335	2.84868
ENSG00000087842	8.73538	8.71909	8.78375	8.74569	8.93482	8.94404	9.03871	8.96572	8.97313	9.09009	9.00483	9.07129	9.08579	9.08375	9.33538	9.27274	9.29843	9.44166	9.43177	9.44238	8.88511	8.85198	8.90079
ENSG00000087884	6.96372	6.82878	6.97309	6.61377	6.91389	6.40755	6.92345	6.76291	6.82504	6.86888	6.72682	6.47639	6.56879	6.64002	6.6933	6.90038	6.80741	6.63759	6.39429	6.48496	6.31309	6.02702	6.44557
ENSG00000087903	3.66462	3.84069	3.1537	4.30805	4.65063	3.41682	4.11005	4.24289	3.05032	3.41368	3.446	4.36209	3.92029	3.94287	3.46282	3.66127	4.12811	3.29673	4.1357	4.13808	5.2492	4.72952	4.76512
ENSG00000087995	8.16633	7.98323	8.02219	7.75978	8.033	8.25277	8.19061	8.20177	8.26824	8.1674	8.05609	8.15361	8.11581	8.12486	8.21306	8.32847	8.12404	8.19758	8.24164	8.00416	8.28427	8.40794	8.29991
ENSG00000088035	7.66594	7.8903	8.00232	7.97326	7.97857	7.96881	8.17196	7.88416	7.93978	7.82223	8.06742	7.7921	8.03111	7.98361	8.00684	7.87059	8.09574	7.95935	8.02281	7.85006	7.8859	7.7187	7.82267
ENSG00000088038	9.68742	9.71322	9.77056	9.72194	9.59576	9.67288	9.5432	9.68067	9.8055	9.58629	9.70975	9.73112	9.58609	9.62556	9.44551	9.66838	9.61586	9.57146	9.66388	9.72313	9.29712	9.20767	9.31403
ENSG00000088053	4.11717	4.16687	4.72539	4.54376	4.09411	4.26934	4.28076	4.77469	4.37648	4.45436	3.6868	3.91933	4.71425	4.03011	4.67286	4.35189	4.29895	4.70096	5.26451	4.84189	2.79189	4.10818	3.65144
ENSG00000088179	8.36301	8.07015	8.34763	8.21721	8.22135	8.39935	8.28664	8.41676	8.36097	8.36338	8.09379	8.4145	8.29971	8.20128	8.16078	8.46146	8.43506	8.44981	8.28075	8.46154	8.00299	8.22697	8.23281
ENSG00000088205	9.63752	9.57339	9.57857	9.7145	9.69879	9.54993	9.73718	9.7227	9.71194	9.7217	9.66647	9.62192	9.67255	9.68557	9.73485	9.76331	9.71163	9.78739	9.67053	9.87685	10.2156	10.2979	10.2813
ENSG00000088247	11.2623	11.2915	11.236	11.1692	11.1511	11.1232	11.1737	11.1351	11.2644	11.274	11.27	11.2712	11.2408	11.2525	11.2504	11.289	11.1502	11.3458	11.3056	11.2627	11.3752	11.2996	11.2646
ENSG00000088256	10.5117	10.5586	10.6385	10.5011	10.4929	10.3961	10.4877	10.5252	10.575	10.4933	10.4271	10.4285	10.5965	10.5127	10.376	10.5131	10.4227	10.5558	10.4868	10.448	10.7276	10.7495	10.7401
ENSG00000088280	9.44059	9.61856	9.40266	9.48617	9.51682	9.64408	9.57637	9.49066	9.46668	9.61914	9.62548	9.61993	9.71651	9.45477	9.76102	9.55749	9.59346	9.78258	9.81904	9.70251	9.64819	9.53552	9.42957
ENSG00000088298	9.00836	9.01437	9.08593	8.88024	8.97283	9.09638	9.03871	9.18553	8.94295	9.03804	8.93944	8.83765	9.05872	9.03185	8.93347	8.80936	8.8502	8.82222	8.83608	8.76057	8.81091	8.6584	8.60128
ENSG00000088305	5.83466	6.17956	6.42857	6.35793	6.27375	6.25338	6.15979	6.28558	5.98719	5.75787	5.71341	6.11844	6.20399	6.06915	6.4206	6.44985	6.06487	6.17693	6.07984	6.29461	6.24427	6.04404	6.12777
ENSG00000088325	7.88137	7.34108	7.82382	7.38701	7.25494	6.70392	6.80251	7.52792	7.72243	7.21984	6.64357	7.18547	7.25267	7.4707	7.30444	7.44157	7.3252	7.26678	7.15502	6.96151	7.09321	7.20933	7.40243
ENSG00000088340	7.14134	7.18166	6.82459	6.90254	7.38206	7.54742	7.37375	7.06523	7.2954	7.33936	7.16523	6.88737	7.13319	6.61202	6.6298	7.14764	6.34396	6.81771	7.10881	6.75519	5.76363	5.39237	5.5389
ENSG00000088356	9.04391	9.04116	9.1408	8.9367	9.00422	9.03263	9.02976	9.18291	9.0431	8.93744	8.86789	9.12002	9.03947	9.0812	9.01339	9.18881	9.24194	9.16678	9.13977	9.108	9.07143	9.10804	9.20536
ENSG00000088367	7.95793	7.90495	7.7784	8.0061	7.86501	7.8925	7.83081	7.77722	7.65699	7.56457	7.89217	8.13661	7.88466	7.93358	7.77703	8.15242	8.15813	8.11673	7.73407	7.72353	8.49868	8.49787	8.44741
ENSG00000088386	8.74326	9.04116	8.87827	8.97454	9.05417	9.21862	9.16128	9.0195	9.10166	9.13621	9.10677	8.96548	9.00301	8.94753	8.94981	8.87349	9.0902	8.83622	8.88945	8.89805	7.72349	7.91644	7.54768
ENSG00000088387	7.63236	7.91947	7.70747	7.61397	7.80793	7.60434	7.43833	7.74211	7.73658	7.72681	7.48514	7.45938	7.72165	7.53176	7.30444	7.49691	7.54489	7.57017	7.57321	7.57088	8.22637	8.28894	8.0347
ENSG00000088448	10.168	10.0596	10.1169	9.97102	10.0377	9.96448	9.95303	10.0841	10.1461	10.0781	10.0634	9.94189	10.0284	10.0078	9.9516	10.0115	10.049	10.0789	10.1461	10.1681	10.2272	10.3243	10.3431
ENSG00000088451	7.23381	7.48462	7.13499	7.20093	7.35574	7.26422	7.46514	7.09893	7.2954	7.29569	7.35163	7.18547	7.20408	7.30568	7.32463	7.19621	7.48419	7.37302	7.44269	7.34391	7.27668	7.43893	7.61517
ENSG00000088538	3.37086	3.84069	4.28035	3.95122	3.59143	4.09871	2.9083	3.77179	3.37366	3.79447	3.98614	3.91933	4.10098	3.64421	3.46282	4.04751	3.58383	3.75539	4.30156	4.13808	4.8652	4.77098	5.06158
ENSG00000088543	6.61404	6.1305	6.50026	6.5923	6.94952	6.46137	6.32503	6.79067	6.58032	6.88862	6.53996	6.42256	6.56879	6.22518	6.2829	6.33308	6.04098	6.22027	6.12697	6.31147	6.24427	5.76499	5.51735
ENSG00000088682	9.47649	9.69857	9.57525	9.55439	9.66883	9.64989	9.67154	9.59274	9.73324	9.54647	9.70291	9.57541	9.60679	9.59369	9.67516	9.7471	9.5914	9.63823	9.53002	9.526	9.32238	9.33062	9.4482
ENSG00000088727	4.7387	5.5558	5.33974	5.42484	4.76169	4.68579	4.75645	4.77469	5.18505	4.09546	5.03006	5.11663	5.14323	4.94093	5.23884	5.24403	4.98975	4.99521	5.05301	4.93185	5.57478	5.61365	5.25627
ENSG00000088756	3.66462	3.84069	3.2894	3.80955	3.70696	4.00518	3.42774	2.87372	3.22103	3.61661	3.79363	3.10575	3.47249	3.52913	3.72834	3.96021	2.92492	3.75539	3.8558	3.97836	4.8652	4.45204	5.11994
ENSG00000088766	9.74943	9.77836	9.69314	9.82218	9.94663	10.1273	10.0133	9.94742	10.0531	9.97109	9.97958	9.85143	9.97868	9.88302	9.97255	9.99785	9.9531	9.95178	9.96128	9.93103	9.53464	9.41153	9.43389
ENSG00000088808	9.5458	9.4363	9.53144	9.48617	9.52865	9.48645	9.5369	9.43678	9.41703	9.49592	9.52051	9.55053	9.54572	9.50131	9.49535	9.45143	9.4444	9.50144	9.68109	9.50966	9.35701	9.27947	9.30462
ENSG00000088812	11.6779	11.7046	11.6515	11.7476	11.7477	11.7489	11.7212	11.6941	11.7209	11.8079	11.7178	11.7477	11.685	11.7212	11.6585	11.6202	11.6691	11.5029	11.4341	11.5063	10.9928	11.1197	11.0854
ENSG00000088826	9.26819	8.90559	9.19365	9.00329	8.86813	8.62442	8.75706	8.85833	8.82873	8.86956	8.91894	8.88816	9.06145	9.20352	9.09207	9.09459	9.05486	9.28036	9.17944	9.11041	10.1559	10.1228	10.0485
ENSG00000088832	10.9243	10.9291	10.9823	10.7213	10.8004	10.8423	10.8134	10.8541	10.8665	10.8353	10.8172	10.8917	10.8999	10.9691	10.8903	10.8521	10.8886	10.9698	10.8673	10.8595	11.3524	11.2816	11.2949
ENSG00000088833	10.3273	10.2568	10.1935	10.203	10.0879	10.1898	10.2591	10.252	10.2484	10.2932	10.2729	10.2326	10.178	10.3152	10.3405	10.3096	10.3048	10.3806	10.3361	10.3133	10.436	10.3156	10.3137
ENSG00000088836	6.17504	5.43978	5.83727	5.51888	4.91371	4.62421	4.3591	5.66054	5.72869	5.42107	5.74038	5.7028	5.62877	5.36669	4.39587	5.38479	5.62522	5.18219	5.39859	5.27899	6.82759	6.8224	6.7801
ENSG00000088854	8.77053	8.57069	8.74024	8.86241	8.5306	8.70471	8.59657	8.6161	8.74373	8.65016	8.63271	8.66683	8.80558	8.69067	8.83485	8.65111	8.75798	8.80809	8.7782	8.80886	8.65794	8.75973	8.60894
ENSG00000088876	6.86597	7.08198	7.0799	6.88498	7.02937	7.24389	7.18235	7.48056	6.87705	7.31039	7.20932	7.13058	6.90905	7.10934	7.31457	7.0453	7.19057	6.98621	7.05011	7.2658	7.19881	7.05001	7.15516
ENSG00000088881	8.58988	8.54284	8.58706	8.57558	8.50289	8.5601	8.58846	8.49899	8.61564	8.76135	8.61825	8.47744	8.50216	8.30986	8.66312	8.66153	8.46229	8.59684	8.79289	8.65886	8.81091	8.66941	8.60384
ENSG00000088882	5.54092	5.73057	6.0812	6.35793	6.09442	5.00857	5.54075	5.63013	5.86372	5.47427	5.86811	5.60953	6.10161	5.87074	5.88086	5.95819	5.657	6.07042	5.39859	5.86299	5.22083	4.50215	5.09106
ENSG00000088888	11.2868	11.2512	11.1907	11.285	11.2347	11.2787	11.2907	11.2173	11.268	11.3174	11.2086	11.302	11.309	11.2513	11.3547	11.2687	11.2164	11.2981	11.3137	11.3671	11.4339	11.4936	11.3951
ENSG00000088899	10.4237	10.3251	10.3818	10.3365	10.1707	10.0851	10.2617	10.2179	10.2993	10.2289	10.3829	10.243	10.3991	10.2186	10.178	10.3616	10.2935	10.5782	10.6361	10.5268	10.486	10.4517	10.3949
ENSG00000088926	8.98194	9.04778	8.84562	9.1538	9.22622	9.41324	9.36009	9.16976	9.12604	9.1769	9.35374	9.16715	9.00017	8.88747	9.0196	8.99652	9.01863	8.68457	8.74586	8.79394	7.74358	7.68113	7.76897
ENSG00000088930	9.99874	9.98047	9.98816	10.01	9.96415	9.84134	9.99963	10.0457	10.0028	10.0054	9.95533	9.92586	10.0353	10.0619	10.1542	9.97018	9.9499	10.0013	10.0577	9.99765	10.0651	10.2102	10.1474
ENSG00000088970	7.00366	6.88901	6.96297	7.11319	7.2738	7.08153	7.35476	6.99538	7.32379	7.13977	7.27071	7.23835	7.21393	7.08917	7.10873	7.38403	7.4022	6.96088	7.19243	7.16997	7.05354	7.37984	7.20764
ENSG00000088986	11.0225	10.9676	10.9308	10.9567	11.0363	11.0328	11.061	11.0152	10.9369	10.9004	10.9604	11.0112	10.9539	11.0071	11.0512	11.0621	11.0188	11.055	11.0361	11.0106	11.0464	10.9388	10.9577
ENSG00000088992	5.86389	5.35691	5.57042	4.75716	4.96103	4.85619	4.69737	5.46767	5.05561	4.09546	5.03006	5.07071	5.1014	5.26247	4.9578	5.31612	4.83169	4.65957	4.72567	4.88757	5.57478	5.80547	5.56013
ENSG00000089006	10.2725	10.411	10.3381	10.4089	10.4999	10.4625	10.4162	10.4147	10.4708	10.4656	10.4528	10.4122	10.3976	10.3107	10.4035	10.5092	10.5317	10.3987	10.4385	10.4201	10.0491	9.98091	10.2333
ENSG00000089009	12.4977	12.5282	12.5517	12.5629	12.628	12.5241	12.5092	12.5742	12.5574	12.5739	12.531	12.5268	12.5074	12.5637	12.6112	12.5756	12.5685	12.6041	12.5301	12.508	12.7155	12.6029	12.637
ENSG00000089022	8.9985	9.07721	9.0216	9.07084	8.92292	8.86331	9.03573	8.89916	9.00854	8.88438	8.91006	9.02087	9.20168	8.86256	9.09794	9.05035	9.17493	9.09485	9.29572	9.26336	9.20959	9.2431	9.29674
ENSG00000089041	6.24336	6.3392	6.17181	6.43232	6.15671	6.92434	6.43762	6.63093	6.62663	6.45796	6.42833	5.97623	6.4065	5.91725	5.50968	5.60224	5.80614	5.18219	5.56756	5.1723	3.84118	4.04197	3.66875
ENSG00000089048	8.30557	8.25315	8.03648	8.0061	8.33347	8.08193	8.09965	8.22153	8.26663	8.06699	8.13501	8.19663	8.09112	8.25659	8.28448	8.39643	8.33549	8.24819	8.27728	8.44254	8.2892	8.46666	8.4812
ENSG00000089050	8.73142	9.06093	8.9207	8.9452	8.96994	9.05322	9.00865	8.79464	9.14208	9.02026	8.89214	8.92412	8.85982	8.96424	8.96918	8.94629	9.1556	9.04148	8.82897	8.82362	8.61226	8.42505	8.67612
ENSG00000089053	10.5925	10.5388	10.5202	10.5904	10.6572	10.6344	10.6649	10.5334	10.6224	10.6373	10.6831	10.7098	10.5984	10.6498	10.6495	10.5732	10.6705	10.6266	10.6469	10.5964	10.6964	10.7364	10.7172
ENSG00000089057	8.40835	8.55683	8.5402	8.43791	8.72129	8.55598	8.61664	8.66566	8.67194	8.47852	8.50489	8.66297	8.54179	8.55016	8.232	8.55009	8.58297	8.44068	8.39427	8.39983	8.19024	8.1187	8.08318
ENSG00000089060	8.82728	9.02448	8.8401	8.80756	8.86502	8.92182	9.06232	9.0018	8.74723	8.93744	8.94814	8.67453	8.8816	8.74002	8.96275	8.97719	8.91733	8.97976	9.1455	8.88966	9.44242	9.3202	9.25014
ENSG00000089063	10.2643	10.3667	10.2672	10.3637	10.4111	10.3961	10.4446	10.3131	10.2921	10.4206	10.3361	10.3574	10.3158	10.4005	10.2758	10.2918	10.2731	10.2137	10.3014	10.3164	10.477	10.4668	10.5255
ENSG00000089091	4.60659	4.26104	4.40512	4.50476	4.09411	4.18655	4.01647	4.46588	4.37648	3.79447	4.50942	4.11301	4.59872	4.11236	4.39587	4.04751	4.37733	4.3827	4.72567	4.13808	4.28664	4.72952	4.29353
ENSG00000089094	8.32672	8.01716	8.30422	8.11551	7.93184	8.01153	7.91101	8.03103	8.19672	7.87264	8.0833	7.92708	8.00298	8.04773	8.15515	8.34135	8.14699	8.323	8.18006	8.14158	8.52502	8.37886	8.25902
ENSG00000089123	6.66475	6.44329	6.72037	6.73629	6.77518	6.79057	6.89744	6.63093	6.3786	6.31945	6.39478	6.54517	6.95675	6.43153	6.58028	6.43374	6.64263	6.91765	6.44477	6.79169	6.88296	6.62169	6.98239
ENSG00000089127	5.54092	5.79495	5.74584	5.76903	6.21642	6.16963	6.18151	5.83064	6.14401	6.31945	5.62937	6.11844	5.82146	5.93995	6.34353	5.84089	6.17869	5.95542	5.98069	5.76849	5.82146	5.51947	5.84599
ENSG00000089154	11.3637	11.4783	11.3708	11.4463	11.4338	11.3945	11.4861	11.4336	11.4625	11.4831	11.4349	11.4722	11.4804	11.4223	11.4393	11.3958	11.4018	11.539	11.4677	11.5095	12.0465	12.1548	12.0555
ENSG00000089157	13.4092	13.4874	13.5217	13.4472	13.5276	13.5598	13.5597	13.5465	13.4881	13.5014	13.5358	13.468	13.4205	13.5298	13.5065	13.5187	13.4661	13.5393	13.494	13.4256	13.6586	13.6041	13.6088
ENSG00000089159	10.5301	10.5019	10.5193	10.5126	10.4929	10.419	10.3338	10.4335	10.3346	10.3061	10.4731	10.4228	10.487	10.4369	10.4674	10.4026	10.4411	10.4611	10.4556	10.3956	10.8109	10.8363	10.7546
ENSG00000089163	6.07859	6.59565	6.79068	6.77493	6.57684	6.91151	6.85752	6.6462	6.96379	6.8286	6.9042	6.20601	6.50605	6.52459	6.19789	6.26184	6.45656	6.20597	6.30147	5.99407	5.2492	5.31037	5.11994
ENSG00000089177	8.65822	8.50003	8.53339	8.42582	8.56163	8.4623	8.56799	8.44323	8.52889	8.60317	8.39465	8.40989	8.63637	8.58299	8.62699	8.48902	8.63575	8.52376	8.42602	8.33947	9.03319	8.98127	9.12394
ENSG00000089195	7.90266	7.49435	7.93147	7.65897	7.62908	7.60434	7.64005	7.7492	7.61932	7.74857	7.7797	7.8879	7.79565	7.75944	7.9166	7.7259	7.843	7.93787	7.99343	8.01865	8.25813	7.95743	8.29112
ENSG00000089220	13.2638	13.4166	13.3013	13.4024	13.5418	13.5852	13.6034	13.4585	13.486	13.5162	13.605	13.419	13.4222	13.3933	13.3826	13.3872	13.3335	13.2162	13.2261	13.1475	12.3015	12.1604	12.1969
ENSG00000089234	8.46191	8.45591	8.37839	8.41363	8.34689	8.49707	8.54304	8.38068	8.64968	8.46544	8.42405	8.36779	8.49005	8.3821	8.67496	8.4812	8.4073	8.6427	8.38461	8.44254	8.64999	8.73374	8.70976
ENSG00000089248	11.0719	11.0515	10.9178	11.0512	11.0865	11.0773	11.1429	11.0792	11.16	11.0193	11.078	11.0346	11.0186	11.1195	11.2096	11.0423	10.9879	11.0455	11.0366	10.918	10.9907	10.8748	10.9761
ENSG00000089280	11.4071	11.3859	11.3917	11.3279	11.2867	11.1845	11.2994	11.2682	11.4187	11.3823	11.2987	11.2527	11.2963	11.3059	11.3718	11.4165	11.2674	11.3584	11.4294	11.4346	11.7964	11.7393	11.7869
ENSG00000089289	8.55894	8.45092	8.55711	8.38893	8.44167	8.32389	8.57621	8.4778	8.47927	8.46544	8.60364	8.40989	8.44058	8.57213	8.48619	8.55754	8.53676	8.69996	8.33194	8.51346	8.5337	8.66116	8.63419
ENSG00000089327	4.01664	3.04778	5.13875	3.95122	4.00662	3.26368	3.10297	4.07244	4.14152	3.61661	3.98614	3.91933	3.82069	4.98526	2.94184	4.35189	4.21606	3.58899	4.35532	3.97836	6.94498	7.23178	7.40243
ENSG00000089335	8.06589	8.13115	8.10053	8.54986	8.31538	8.31845	8.3094	8.38479	8.30407	8.34207	8.25673	8.3875	8.53513	8.24118	8.18633	8.41928	8.42845	8.18432	8.34389	8.38795	8.07442	8.04755	8.16462
ENSG00000089351	9.34016	9.35322	9.29389	9.27667	9.00986	9.06486	9.17217	9.09936	9.04878	9.232	9.12223	9.20749	9.20662	9.16309	9.15262	9.17918	9.16944	9.39828	9.3792	9.28912	10.3395	10.2391	10.1588
ENSG00000089356	4.46115	4.43273	4.72539	4.90382	4.81416	5.27216	5.20125	4.93253	5.18505	5.47427	5.271	5.47498	4.59872	4.58533	4.39587	4.2816	4.45167	4.85558	4.2314	4.54166	2.44467	3.74177	3.31621
ENSG00000089472	8.50429	8.51921	8.64514	8.8029	8.82403	8.63226	8.70552	8.39432	8.71901	8.65593	8.51273	8.50792	8.52211	8.60091	8.5519	8.67872	8.35499	8.51798	8.49052	8.4194	8.34941	8.29251	8.33181
ENSG00000089486	9.65852	9.80205	9.76184	9.66907	9.80309	9.76671	9.71315	9.71729	9.67752	9.79932	9.83229	9.72557	9.82972	9.7908	9.81376	9.83255	9.77091	9.84737	9.89928	9.86263	9.12982	9.17522	9.1132
ENSG00000089505	3.90857	3.71322	2.83672	2.41696	2.81341	3.26368	3.9164	2.87372	3.8607	3.17748	3.30863	3.27729	3.59813	3.26713	2.44783	4.2816	2.43195	3.97374	3.69828	4.47379	4.17276	3.97257	3.1013
ENSG00000089597	12.7072	12.7518	12.7091	12.7149	12.7998	12.8537	12.7946	12.7467	12.7267	12.7999	12.7972	12.7276	12.7277	12.7055	12.6963	12.7	12.7212	12.7381	12.6657	12.6	12.7246	12.741	12.6795
ENSG00000089639	7.90968	7.94806	7.96226	7.79677	7.73495	7.27428	7.60833	7.38955	7.65699	7.47605	7.66477	7.60341	7.75576	7.78474	7.82034	7.64423	7.98119	8.14325	7.93725	8.06412	8.84384	8.74939	8.75649
ENSG00000089682	8.51815	8.4409	8.58046	8.57558	8.58824	8.60462	8.61664	8.52814	8.51254	8.51706	8.61096	8.63563	8.62165	8.55385	8.63105	8.34996	8.59122	8.46491	8.66832	8.67523	8.70223	8.78018	8.67855
ENSG00000089685	6.12762	4.72481	5.85925	5.37541	4.46617	4.55988	4.63576	4.93253	5.34133	4.22527	4.62966	5.43928	5.1014	5.26247	5.00861	5.00322	5.13219	4.99521	4.72567	4.64316	3.68378	3.36224	3.21276
ENSG00000089692	3.37086	3.84069	3.1537	1.2909	4.09411	2.0795	2.9083	2.64953	3.37366	2.89487	2.57265	2.91102	2.81967	1.54457	2.44783	0.978915	3.29167	0.79541	2.45752	2.22973	2.6287	2.68152	2.36053
ENSG00000089693	11.2712	11.3122	11.3626	11.2808	11.3074	11.1798	11.3186	11.2914	11.3017	11.2982	11.4219	11.2003	11.277	11.2157	11.0996	11.2435	11.1369	11.2322	11.1156	11.026	11.4432	11.412	11.4211
ENSG00000089723	6.10331	6.17956	6.47201	5.98214	5.91383	6.37053	6.24478	6.20535	5.91438	5.88118	6.15535	6.30849	6.45714	5.98432	6.24102	5.88896	5.96687	5.81167	5.75925	5.86299	5.84024	6.17338	5.79317
ENSG00000089737	10.3699	10.3641	10.4193	10.3154	10.4047	10.3996	10.4265	10.4565	10.4083	10.3915	10.3925	10.4136	10.3363	10.3985	10.4932	10.3963	10.4716	10.5048	10.4678	10.5465	10.5365	10.5819	10.6545
ENSG00000089775	7.52666	7.8454	7.57429	7.67948	7.85252	7.69699	7.61633	7.62363	7.95195	7.84261	7.67179	7.60341	7.6725	7.72062	7.78434	7.75213	7.55335	7.62496	7.93725	8.01351	7.51147	7.53834	7.59474
ENSG00000089818	8.54095	8.73829	8.61284	8.55697	8.60695	8.65168	8.6006	8.6694	8.63424	8.67877	8.6255	8.62772	8.62534	8.66023	8.73277	8.55382	8.57746	8.60463	8.56369	8.62089	8.96212	9.06909	9.15361
ENSG00000089820	6.7824	7.11941	7.06106	6.97069	6.83989	7.07003	7.25319	7.16352	6.83559	6.89916	7.04061	7.09661	7.00293	7.00553	7.04931	7.01312	6.96801	7.10983	6.98636	6.98271	6.54522	6.15783	6.16982
ENSG00000089847	6.02783	5.97246	6.04331	6.04672	5.98423	5.98598	6.18151	6.00665	6.3786	5.75787	6.09395	5.43928	5.89676	5.77296	5.90788	6.26184	6.30438	6.24846	6.60871	6.17075	5.87707	5.33822	5.60168
ENSG00000089876	9.73368	9.63184	9.65438	9.64059	9.59764	9.61667	9.51568	9.68252	9.75427	9.70232	9.60545	9.59784	9.53004	9.74479	9.617	9.61221	9.79074	9.76805	9.68241	9.88391	10.4032	10.4268	10.4372
ENSG00000089902	9.52307	9.47366	9.4194	9.59274	9.51088	9.56844	9.55573	9.60647	9.57299	9.55884	9.64344	9.51882	9.57658	9.5146	9.36737	9.48114	9.54546	9.45381	9.34639	9.40556	9.29031	9.4772	9.40191
ENSG00000089916	9.8331	9.70696	9.84955	9.83823	9.85411	9.83795	9.72058	9.71367	9.88068	9.80712	9.59994	9.81707	9.85983	9.88156	9.76287	9.74057	9.77815	9.70841	9.8498	10.0093	9.84808	10.1027	9.95744
ENSG00000090006	4.97137	5.17534	4.94683	4.90382	5.09431	4.74485	4.57141	4.65897	4.96239	4.65201	4.44532	4.70039	4.5373	4.58533	4.90514	5.04625	4.77491	5.02811	4.95193	4.58888	5.66178	5.99238	5.8286
ENSG00000090013	9.0018	9.14052	8.97455	8.95784	9.21406	9.06195	9.19638	9.10214	9.15266	8.92316	9.19225	9.13404	9.17672	8.98622	9.32038	9.24299	9.16668	9.39198	9.35961	9.14374	9.43009	9.40166	9.3901
ENSG00000090020	7.87421	7.66769	7.7014	7.56289	7.38206	7.25409	7.34517	7.25653	7.48331	7.29569	7.53988	7.68187	7.59171	7.74016	7.47673	7.48131	7.34484	7.54198	7.83687	7.55681	7.76829	8.00165	7.77353
ENSG00000090054	9.29838	9.05628	9.20717	9.11291	9.11513	9.13553	9.10556	9.20317	9.11629	9.2124	9.0824	9.17376	9.05585	9.26986	9.17856	9.13147	9.2166	9.08406	9.124	9.22468	9.24904	9.36447	9.41127
ENSG00000090060	11.4268	11.4971	11.4316	11.4649	11.5731	11.5893	11.4921	11.5257	11.4987	11.4855	11.5009	11.4849	11.5325	11.5032	11.472	11.485	11.5514	11.4451	11.484	11.5205	11.6495	11.7344	11.7841
ENSG00000090061	10.282	10.2653	10.2907	10.2101	10.2165	10.256	10.2137	10.2755	10.1207	10.1636	10.252	10.2063	10.2396	10.1618	10.2244	10.2079	10.246	10.2101	10.2536	10.1577	10.4875	10.4365	10.4336
ENSG00000090097	10.0897	10.053	10.0178	10.0656	9.78513	9.82433	9.87186	10.0572	9.97767	9.95012	9.99366	10.0149	10.0533	10.0554	10.0213	10.0277	9.96267	10.2464	10.1585	10.2237	9.99772	9.84921	9.81015
ENSG00000090238	8.54997	8.55218	8.47052	8.624	8.39074	8.44904	8.60864	8.59657	8.49184	8.62097	8.55131	8.35348	8.39369	8.39449	8.26372	8.32397	8.31572	8.26208	8.39748	8.42715	8.21562	8.18156	8.15819
ENSG00000090263	8.35788	8.50965	8.45617	8.58648	8.48682	8.61653	8.61664	8.51155	8.70109	8.60317	8.54367	8.61977	8.40663	8.64994	8.60239	8.50838	8.58297	8.49463	8.31168	8.28076	8.22637	8.12271	8.18578
ENSG00000090266	9.52307	9.58481	9.46132	9.53763	9.45826	9.59677	9.51995	9.36473	9.58282	9.51825	9.48309	9.56716	9.46966	9.45477	9.47291	9.48505	9.53053	9.48377	9.51975	9.32068	9.23995	9.1963	9.25014
ENSG00000090273	10.6711	10.5258	10.5867	10.5409	10.4552	10.3493	10.4333	10.4662	10.6479	10.4933	10.4498	10.5464	10.4921	10.5556	10.7207	10.5896	10.6994	10.7648	10.6603	10.6454	10.9749	10.9669	11.002
ENSG00000090316	10.1127	10.0936	10.0528	10.1507	10.0056	9.92353	10.1394	10.2407	10.1853	10.1411	10.1158	10.1003	10.0298	10.1534	10.178	10.0503	10.0639	10.2297	10.1289	10.2436	10.2467	10.1545	10.1931
ENSG00000090339	10.7388	10.6298	10.7559	10.2569	10.2901	10.3776	10.2281	10.3774	10.3882	10.4525	10.259	10.2182	10.373	10.3537	10.0504	10.0856	9.9563	9.88377	9.67053	9.66857	10.4972	10.5695	10.5804
ENSG00000090372	10.2793	10.2337	10.2497	10.2118	10.0583	10.1466	10.0118	10.131	10.1554	10.1837	10.2116	10.1494	10.0925	10.1691	10.1286	10.1111	10.1177	10.2385	10.2491	10.2002	10.3697	10.3015	10.3277
ENSG00000090376	6.3297	6.44329	6.90075	6.86721	6.39929	6.83202	7.33551	6.83133	6.30456	6.86888	6.85571	7.01409	6.68664	6.61202	6.94881	6.87674	6.90325	6.56098	6.51732	6.6793	7.10878	7.81601	7.56879
ENSG00000090382	9.83495	9.79616	9.79358	9.76815	9.7502	9.67288	9.84148	9.86496	9.79709	9.93122	9.76823	9.66698	9.70084	9.87568	9.47968	9.50832	9.58935	9.50729	9.49002	9.535	10.3575	10.262	10.3369
ENSG00000090402	2.77413	2.81922	3.63345	3.27513	3.91348	4.09871	4.3591	2.87372	3.37366	4.34436	3.98614	3.27729	2.59694	3.64421	3.84477	3.28375	4.12811	2.92982	2.95216	3.79873	1.68796	1.73155	1.90961
ENSG00000090432	9.36848	9.35856	9.41569	9.35844	9.29245	9.29964	9.44111	9.37852	9.41923	9.40294	9.34499	9.49511	9.52213	9.48596	9.49312	9.4831	9.41682	9.53043	9.37433	9.43855	9.70178	9.62162	9.64857
ENSG00000090447	6.3297	6.42307	6.45768	6.90254	6.49883	6.71873	6.7742	6.53572	6.51616	6.63192	6.67186	6.80562	6.53776	6.36597	6.90925	6.86477	6.40136	6.8821	6.83373	6.59919	6.90096	6.59885	6.64752
ENSG00000090470	7.81557	7.79119	7.94181	7.63817	7.69353	7.70445	7.9175	8.05984	7.75754	7.63635	7.67179	7.8679	7.63634	7.65352	7.55573	7.62307	7.87036	7.85321	7.81785	7.94494	7.87228	7.88374	7.66011
ENSG00000090487	9.6354	9.78828	9.79215	9.81756	9.87433	9.93784	9.88018	9.81514	9.86305	9.71342	9.79259	9.86158	9.85354	9.7656	9.83854	9.81555	9.82261	9.8171	9.80944	9.87685	10.005	9.85404	9.96443
ENSG00000090512	5.50426	5.76312	5.76924	6.07795	5.96114	6.40755	6.26526	6.09835	6.39653	5.66939	6.27081	5.7326	6.05853	5.84691	5.05769	5.65879	5.03881	5.02811	4.9166	4.47379	2.6287	3.36224	3.50322
ENSG00000090520	10.3364	10.1562	10.1294	10.2012	10.1117	10.0223	10.0462	10.1525	10.0816	10.1411	10.1577	10.0859	10.1163	10.1988	10.0595	10.13	10.2009	9.91378	9.90928	9.94815	10.3246	10.3973	10.5072
ENSG00000090530	7.47075	7.04274	7.06106	6.84922	6.70743	5.7177	6.22399	6.56816	6.3786	6.60832	6.36043	6.26836	6.14344	6.78501	6.51148	6.12804	6.40136	5.98922	6.17262	5.81652	6.35285	6.20398	6.36341
ENSG00000090534	7.44197	7.34108	7.29675	7.50661	7.55392	7.48815	7.54271	7.66921	7.38794	7.28083	7.36034	7.27931	7.18418	7.15857	7.25268	7.61594	7.45738	7.35369	7.32635	7.50646	7.45169	7.2971	7.41413
ENSG00000090539	9.13065	9.57797	9.29792	9.33923	9.23827	9.52487	9.42754	9.39895	9.36562	9.44352	9.34499	9.33922	9.30435	9.06321	9.15826	9.31294	9.07851	9.17047	9.23248	9.2976	8.73771	8.46666	8.6516
ENSG00000090554	3.86644	2.60035	3.1537	4.50476	3.57571	3.54996	3.7999	3.44562	3.66512	3.79447	4.37824	3.43059	3.68112	4.17648	2.2458	3.66127	3.29167	3.97374	3.82945	2.85904	2.49861	3.46689	2.95253
ENSG00000090565	9.8257	9.95252	9.89813	9.86981	9.83677	9.97068	9.93076	9.93037	9.90593	9.85804	9.94957	9.88498	9.95539	9.81403	9.86808	9.80462	9.78176	9.86341	9.90154	9.90628	9.58002	9.48345	9.4382
ENSG00000090581	9.47888	9.6141	9.46848	9.63273	9.63641	9.57048	9.63067	9.63355	9.53909	9.50234	9.61277	9.53793	9.49614	9.47434	9.55212	9.55749	9.49142	9.62485	9.63429	9.64881	9.69921	9.48033	9.54189
ENSG00000090612	8.9719	9.09968	9.05769	9.0035	9.16186	8.89599	9.18029	8.89715	9.00854	8.88928	9.11452	9.1562	9.31583	9.07352	9.17504	9.05035	9.11042	9.17047	9.02211	9.07136	8.81566	8.73374	8.82168
ENSG00000090615	11.053	11.0564	10.9718	11.0264	10.9532	10.9907	11.0202	11.0349	11.0006	11.0795	11.031	11.0953	11.0838	10.9929	11.1905	11.0804	11.0846	11.1773	11.32	11.2937	11.8012	11.9373	11.9951
ENSG00000090621	11.5915	11.6376	11.6815	11.7064	11.6808	11.7021	11.6917	11.6031	11.6872	11.6607	11.6434	11.5878	11.655	11.6092	11.6773	11.7091	11.6831	11.749	11.6847	11.6557	11.7385	11.7222	11.7103
ENSG00000090661	9.87499	10.0791	9.90475	10.044	10.0473	9.97685	10.0403	10.0283	10.0115	9.93833	9.99785	9.9703	10.0764	9.96833	9.92043	9.96599	9.92239	9.83232	9.8498	9.79681	9.20598	9.12213	9.27764
ENSG00000090674	8.06135	7.94806	8.06985	7.55181	7.81438	7.65141	7.54657	8.10476	7.72952	7.84261	7.7854	7.8609	7.67214	7.81349	7.79161	7.83422	8.07237	8.00058	8.08655	8.02378	8.9106	8.99652	8.94142
ENSG00000090686	9.71976	9.61633	9.66378	9.86086	9.72473	9.93625	9.81393	9.71548	9.74905	9.67985	9.66998	9.87833	9.71997	9.69561	9.9287	9.76814	9.81734	9.73978	9.84863	9.8612	10.0205	10.0351	10.0172
ENSG00000090776	9.24616	9.31256	9.07423	9.23571	9.06233	9.11048	9.10272	9.1377	9.02015	9.16885	9.12479	9.04778	9.29046	9.12148	9.0593	9.14494	8.91404	9.00889	9.11075	8.89526	9.14311	9.23015	9.26799
ENSG00000090857	9.87814	9.98061	9.81219	9.87322	9.91927	9.98663	9.92054	9.95643	9.82529	9.90675	9.89244	9.89016	9.85694	9.86935	9.81617	9.84507	9.94897	9.81191	9.92884	9.95675	9.68126	9.72398	9.77479
ENSG00000090861	11.3096	11.4015	11.4109	11.4221	11.5099	11.5344	11.6249	11.4303	11.4127	11.5466	11.5669	11.6116	11.578	11.4902	11.6059	11.5505	11.642	11.6154	11.5471	11.5576	11.1623	11.0826	11.1362
ENSG00000090863	11.5589	11.5599	11.5883	11.6484	11.636	11.6519	11.6239	11.6274	11.5632	11.5977	11.5417	11.609	11.6147	11.6167	11.646	11.5695	11.6059	11.5623	11.5105	11.4702	11.4339	11.5208	11.4759
ENSG00000090889	4.29939	4.34944	4.72539	4.40975	4.00662	3.90516	3.9164	4.24289	4.14152	4.45436	3.57141	3.91933	4.65764	4.64182	4.23448	3.66127	4.37733	3.49799	3.92855	3.89134	1.68796	2.68152	0.756398
ENSG00000090905	10.3022	10.2766	10.3559	10.4363	10.4541	10.5407	10.4822	10.5013	10.4367	10.5013	10.5058	10.4171	10.3408	10.2844	10.4662	10.484	10.4849	10.3188	10.3999	10.4651	10.1218	10.1398	10.1413
ENSG00000090924	10.0135	9.6731	9.68393	9.66394	9.4969	9.39261	9.37666	9.6006	9.54714	9.54025	9.587	9.47542	9.56701	9.41277	9.40579	9.60683	9.52409	9.64488	9.61788	9.59819	10.1074	10.05	9.92814
ENSG00000090971	7.70685	7.8454	7.86785	7.93112	7.74849	7.57209	7.81004	7.8777	7.6345	7.7806	7.88614	7.74171	7.66534	7.57592	7.64676	7.95204	7.61935	8.03413	7.82263	7.77305	7.61321	7.31824	7.61009
ENSG00000090975	9.09719	9.1467	8.90229	9.01947	9.10244	8.93456	9.19638	9.08542	9.05161	8.96558	9.20198	8.86144	9.16662	9.00249	8.79198	9.01017	9.13882	8.9944	9.15121	8.88966	9.06944	9.08356	8.93978
ENSG00000090989	9.11857	9.02783	8.92852	8.91524	9.0892	9.03263	9.03275	9.08822	9.00562	9.09859	9.01315	9.10301	9.1742	9.03449	9.28475	9.0843	9.17493	9.11986	9.19057	9.27414	9.16561	9.18867	9.28084
ENSG00000091009	9.07555	8.73156	8.91499	8.92387	8.87173	8.78077	8.85631	8.87842	8.66419	8.94476	8.82388	8.9293	8.92494	9.04547	8.86394	8.65236	8.94197	8.78938	8.79162	8.77249	8.90698	8.93892	8.78066
ENSG00000091039	9.84048	9.74819	9.88346	9.77293	9.77358	9.76493	9.74814	9.6695	9.90437	9.66562	9.69432	9.78188	9.8393	9.88156	9.71587	9.80931	9.84863	9.76195	9.71619	9.83229	10.1228	10.1633	10.0277
ENSG00000091073	8.05623	8.11308	7.90557	7.96551	7.70538	8.03922	8.18169	8.12523	8.02558	7.90449	8.13836	8.06457	7.96966	7.80467	7.91067	7.91456	7.88934	7.99256	8.12946	8.09779	8.39536	8.22916	8.35033
ENSG00000091127	7.02969	7.16957	7.32071	7.01977	7.10504	6.87231	6.92345	7.12096	7.0227	7.05501	6.97402	7.21743	7.21393	7.28809	7.31457	7.17698	7.54489	7.34718	7.57887	7.49175	7.55189	7.70807	7.47688
ENSG00000091129	8.79729	8.26456	8.65145	8.54796	8.45412	8.19215	8.29662	8.4212	8.5886	8.43221	8.44878	8.81693	8.63637	8.68732	8.91028	8.84939	9.03081	9.4386	9.3497	9.38779	9.59115	9.63291	9.40484
ENSG00000091136	11.5494	11.2016	11.3559	11.2648	10.9663	10.9434	10.8619	11.1659	11.2946	11.1599	11.018	11.2533	11.2226	11.291	11.1676	11.1906	11.3383	11.4447	11.4259	11.4688	11.806	11.7912	11.7498
ENSG00000091140	10.3864	10.3982	10.4072	10.4074	10.4909	10.493	10.5527	10.4865	10.5819	10.4673	10.4436	10.4678	10.533	10.5098	10.4865	10.4713	10.4479	10.2852	10.2903	10.3101	10.1884	10.1088	10.2892
ENSG00000091157	8.47144	8.47569	8.35924	8.56966	8.59576	8.35265	8.43588	8.67686	8.51254	8.55459	8.53215	8.59159	8.57274	8.44695	8.47268	8.55382	8.61163	8.43149	8.3486	8.51495	8.42914	8.53608	8.45026
ENSG00000091164	9.70166	9.71945	9.79643	9.65878	9.79495	9.76493	9.61679	9.77402	9.83045	9.79932	9.82915	9.75672	9.78913	9.87126	9.82974	9.7617	9.83828	9.87927	9.88564	9.83374	10.0164	9.95307	10.0532
ENSG00000091262	11.1364	11.3402	11.2578	11.4374	11.501	11.4373	11.5139	11.3496	11.4334	11.4218	11.4819	11.3138	11.2343	11.1114	11.0438	11.1269	11.1253	10.8537	10.8407	10.8901	9.53938	9.36405	9.43537
ENSG00000091317	10.3584	10.4008	10.3394	10.4866	10.5208	10.5541	10.4569	10.4854	10.5641	10.4087	10.492	10.4952	10.3926	10.5408	10.3856	10.3669	10.476	10.1655	10.1231	10.2676	10.2219	10.2962	10.2267
ENSG00000091409	10.9647	10.8868	10.876	10.9817	10.9554	10.9876	10.9959	10.8796	10.9522	10.8685	10.9011	11.0368	11.0277	11.1338	11.0819	11.0562	11.0476	11.1151	11.0127	11.1163	11.9774	12.1231	12.0009
ENSG00000091428	6.3297	5.85658	5.72205	5.94874	5.91383	6.21211	5.72951	5.66054	6.20633	5.66939	6.13517	6.20601	5.56864	5.69502	5.70717	6.57267	6.30438	5.90318	6.06378	6.0554	5.80244	5.99238	5.99375
ENSG00000091436	9.54805	9.41085	9.3493	9.32303	9.19192	9.229	9.16128	9.21143	9.2885	9.25498	9.12223	9.39851	9.30435	9.36743	9.3819	9.30852	9.43755	9.29732	9.23964	9.1832	9.38125	9.5325	9.47639
ENSG00000091482	4.38253	5.4795	4.72539	5.60717	5.32881	5.23144	5.32351	5.24498	5.22573	4.55657	5.34313	5.40268	5.53761	5.22598	5.00861	5.16814	5.3422	5.26732	5.08519	5.2443	3.76462	3.97257	4.39154
ENSG00000091483	9.92091	10.0331	10.0055	9.99985	10.3028	10.3034	10.245	10.1324	10.1827	10.1696	10.1983	10.1996	10.0601	10.157	10.2417	10.1111	10.1968	10.0229	9.98065	10.0501	9.67719	9.59301	9.63738
ENSG00000091490	9.3837	9.17419	9.28985	9.07858	9.10244	9.03559	9.11123	9.19595	9.1788	8.98404	9.13753	9.21279	9.22379	9.37161	9.40341	9.27951	9.51977	9.64752	9.51681	9.526	10.2388	10.2196	10.2555
ENSG00000091513	16.7348	16.958	16.81	17.0172	17.2462	17.3319	17.3374	17.0401	17.0121	17.1011	17.2178	16.9551	16.9609	16.8808	16.7888	16.7451	16.717	16.3798	16.4157	16.4087	15.7724	15.706	15.6534
ENSG00000091527	12.3215	12.314	12.3549	12.2675	12.318	12.3452	12.3393	12.2666	12.2665	12.2751	12.2511	12.3327	12.3368	12.2808	12.3492	12.2741	12.3359	12.3227	12.2718	12.2597	12.4044	12.4429	12.4762
ENSG00000091536	4.60659	4.72481	4.07028	5.27117	4.76169	4.55988	4.69737	5.11926	4.05385	4.98091	5.07311	4.2009	4.59872	4.74856	4.14647	5.08803	4.37733	4.03975	4.59767	4.58888	3.68378	3.82288	3.58836
ENSG00000091542	10.4444	10.4861	10.4349	10.4691	10.4239	10.3788	10.458	10.5283	10.4496	10.4391	10.5513	10.31	10.362	10.3632	10.2951	10.3963	10.3173	10.4337	10.3108	10.2975	10.8239	10.8623	10.8796
ENSG00000091583	13.2898	13.401	13.3204	13.4515	13.5933	13.5936	13.579	13.5243	13.5188	13.5823	13.5699	13.4479	13.4178	13.4518	13.3787	13.272	13.3899	13.1332	13.0971	13.1134	12.6224	12.5706	12.6422
ENSG00000091622	7.29947	6.7002	7.13499	7.21504	6.78835	6.7479	6.7742	7.07655	6.87705	6.94624	6.75353	6.71897	6.99152	7.11932	6.67769	7.0453	6.74965	6.9264	6.88946	6.91814	7.18419	7.39318	7.19412
ENSG00000091640	9.28989	9.3371	9.3493	9.13536	9.29014	9.40639	9.23843	9.28158	9.29568	9.38916	9.42403	9.32706	9.22865	9.33782	9.41993	9.31733	9.24194	9.21579	9.29572	9.24811	9.1896	9.1982	9.15392
ENSG00000091651	6.59673	5.94435	6.27352	5.73024	6.43324	6.03413	6.34442	6.36158	6.48298	5.84123	6.32525	6.09569	6.12267	6.33204	6.6619	6.26184	6.28418	6.28974	6.59759	6.24282	5.99903	6.14211	5.92994
ENSG00000091656	7.97142	7.9761	7.87865	8.25869	7.9079	7.80501	8.25625	8.00757	8.03443	8.10965	7.65062	8.01458	7.83447	7.93922	7.80605	7.88843	7.79383	7.74359	7.53877	7.69169	7.70313	7.91182	7.62023
ENSG00000091732	8.03062	7.99678	7.84049	8.20311	8.14659	7.99945	8.16107	8.04262	8.01134	8.08421	8.05136	8.08557	7.90304	7.93358	8.04385	8.12258	8.07237	8.10907	8.16508	8.25485	7.93912	7.96192	7.94474
ENSG00000091844	3.37086	1.77532	2.42989	1.2909	2.81341	1.05348	2.0887	2.05824	3.75348	2.54308	2.79469	2.68585	2.59694	2.53429	2.44783	2.54965	2.10338	3.06276	3.20736	2.48879	5.00487	5.61365	5.64207
ENSG00000091879	5.50426	4.26104	5.06502	3.95122	3.32828	3.79768	2.9083	3.39154	4.14152	2.07686	3.57141	4.28374	3.33486	4.26402	3.46282	3.86728	4.45167	3.06276	3.20736	3.97836	5.00487	4.96213	5.42778
ENSG00000091947	8.01115	8.03726	8.01706	7.98154	7.97857	7.87278	8.07665	7.88416	7.8253	8.00507	7.92779	7.97773	7.95681	7.93922	8.16078	7.80945	7.96224	8.01784	8.07582	7.80911	8.08792	8.11065	8.14771
ENSG00000091972	2.17132	1.77532	3.1537	1.2909	2.32758	3.09234	2.41636	3.06772	3.8607	3.61661	1.98892	2.91102	2.59694	3.11581	3.72834	0.978915	2.92492	2.22585	2.24608	1.91374	1.68796	2.28335	3.21276
ENSG00000091986	3.79175	3.57338	4.51996	4.08022	4.17659	2.67303	4.19793	3.06772	4.05385	3.9528	3.79363	3.56915	4.26153	4.03011	3.46282	3.28375	3.44513	3.49799	3.31982	3.21777	2.93848	3.24941	3.1013
ENSG00000092010	9.74943	9.92761	9.80636	9.78953	9.91694	9.87147	10.0403	9.86169	9.93842	9.84042	9.97107	9.88332	9.74056	9.8594	9.88348	9.94908	9.8555	9.70841	9.80582	9.68483	9.50111	9.33755	9.41653
ENSG00000092020	7.71489	7.55137	7.28867	7.81542	7.62908	7.55569	7.65566	7.50297	7.60396	7.62463	7.59262	7.65878	7.48188	7.42314	7.87613	7.97449	7.59496	7.54766	7.60685	7.71088	7.5056	7.5503	7.75062
ENSG00000092036	6.99047	6.63873	7.19672	7.31018	7.01823	7.2492	7.27619	7.2763	6.87257	7.15615	7.31622	7.01409	7.02547	7.21551	7.24211	7.04466	7.12392	7.23894	7.22889	6.53863	7.19495	6.91632	6.9586
ENSG00000092068	6.10331	5.35691	5.94396	5.76903	5.62163	5.46014	5.63822	5.59907	5.93906	4.82581	5.60023	5.95111	5.47346	5.87074	5.32155	5.95819	5.94129	5.54243	5.49756	6.01481	6.36586	6.55204	6.11348
ENSG00000092094	9.07549	8.97323	8.96951	9.01141	9.07314	9.03263	9.04168	8.82516	8.99389	9.11543	8.84633	8.99958	8.97722	8.94192	8.98513	9.07394	9.01557	9.03542	9.30771	9.12479	8.95352	8.80534	8.80621
ENSG00000092096	5.64562	5.59249	5.2758	5.09915	5.00684	5.42445	5.06766	5.46767	4.96239	5.24858	5.15555	5.43928	5.50589	5.15012	5.79663	5.60224	5.41833	5.65201	5.44892	5.01653	5.27703	5.28196	5.35676
ENSG00000092098	8.94189	9.03308	9.1186	8.96061	9.19625	8.89191	9.06182	9.0773	9.01949	8.99695	8.95756	8.95547	9.01624	8.82289	9.08051	8.92324	9.08959	8.98684	8.92764	9.0434	9.17727	9.12399	8.93347
ENSG00000092108	9.49998	9.45635	9.64966	9.59544	9.73837	9.8209	9.61679	9.66388	9.60612	9.39607	9.56077	9.52095	9.54181	9.64123	9.72729	9.59782	9.71729	9.56727	9.69028	9.63715	9.66408	9.78234	9.74095
ENSG00000092140	7.50826	7.56066	7.46386	7.59564	7.5384	7.62807	7.54271	7.51133	7.58845	7.29569	7.36034	7.52896	7.53784	7.63277	7.40269	7.49691	7.43922	7.52479	7.6929	7.92317	7.27668	7.70807	7.73203
ENSG00000092148	11.8198	11.8357	11.8157	11.9298	11.9173	11.9773	12.0415	11.8973	11.93	11.9109	11.9134	11.9468	11.9539	11.9138	11.9791	11.831	11.8773	11.8218	11.8256	11.8496	11.705	11.8688	11.8601
ENSG00000092199	12.4173	12.4067	12.4608	12.3837	12.4932	12.4346	12.4833	12.4475	12.4671	12.4489	12.4325	12.4622	12.4878	12.5185	12.5945	12.4627	12.4967	12.4533	12.4671	12.4387	12.3815	12.3516	12.3739
ENSG00000092200	1.11645	2.21247	2.6476	1.96111	2.0053	1.05348	2.9083	1.63684	1.02897	2.07686	1.98892	2.41891	2.59694	2.53429	2.11834	1.96826	1.06974	1.6811	0.806352	1.91374	3.19336	2.28335	1.90961
ENSG00000092201	10.41	10.3481	10.4639	10.4909	10.3766	10.3071	10.3672	10.4113	10.4148	10.4	10.3977	10.3822	10.4727	10.4268	10.5543	10.4077	10.4915	10.4467	10.464	10.4781	10.2092	10.24	10.1384
ENSG00000092203	10.1547	10.2118	10.1794	10.3349	10.2092	10.1562	10.2578	10.247	10.226	10.1757	10.2672	10.3333	10.3272	10.2152	10.328	10.2885	10.2329	10.249	10.2429	10.2751	10.2943	10.3781	10.3756
ENSG00000092208	6.54352	6.55904	6.58184	6.04672	6.59195	6.73339	5.99784	6.50253	6.48298	6.1982	6.17524	6.38553	6.29958	6.44746	6.92256	6.63037	6.30438	6.48008	6.66302	6.22514	6.33972	6.44081	6.12777
ENSG00000092295	3.66462	3.84069	4.28035	4.19863	4.96103	3.68155	4.43339	4.39531	4.75565	5.05263	4.62966	4.01942	4.26153	3.11581	4.23448	4.41891	3.9343	4.78034	4.59767	4.13808	4.23083	4.68682	4.5696
ENSG00000092330	8.84205	8.78	8.84562	8.81685	8.68652	8.8829	8.91126	8.78432	8.70828	8.91837	8.85561	8.79944	8.72513	8.83696	8.75526	8.81559	8.74695	8.7697	8.76088	8.69142	9.08723	8.96796	8.98954
ENSG00000092421	10.3889	10.1608	10.2011	10.178	9.94957	9.83626	9.87186	10.0327	10.1288	10.0345	9.94813	10.4113	10.3238	10.4289	10.5154	10.5842	10.6607	10.9692	11.056	11.0743	11.9817	12.0301	12.03
ENSG00000092439	10.2629	10.0823	10.1384	10.2223	10.2832	10.3229	10.1777	10.2432	10.193	10.2035	10.2104	10.2287	10.1742	10.2359	10.2041	10.2579	10.2948	10.242	10.3386	10.3237	10.237	10.3956	10.4256
ENSG00000092445	9.74355	9.69224	9.78068	9.60887	9.74514	9.49507	9.60478	9.75301	9.65721	9.74082	9.63987	9.65536	9.66539	9.79543	9.69275	9.5612	9.62794	9.75459	9.67978	9.63381	10.1074	10.0791	9.9179
ENSG00000092470	4.29939	3.84069	3.63345	1.2909	1.58967	2.40658	3.10297	2.87372	3.22103	3.17748	2.57265	3.43059	3.59813	3.85002	2.71588	3.13223	2.92492	3.58899	3.61256	2.89884	3.19336	3.82288	3.74489
ENSG00000092529	5.05992	5.43615	5.64291	5.14942	4.94559	5.81434	5.8151	5.14572	5.51158	5.41456	5.94406	5.96548	5.69918	4.21274	5.25535	5.94597	5.95746	5.44274	5.35492	5.0789	3.89316	3.45065	3.85825
ENSG00000092531	9.7785	9.62963	9.62742	9.53482	9.67416	9.66526	9.65805	9.645	9.52897	9.59532	9.55699	9.72743	9.60492	9.70226	9.60673	9.76492	9.84174	9.82648	9.63293	9.67672	9.99249	10.0688	10.0597
ENSG00000092607	3.00157	3.04778	3.1537	2.41696	3.46585	2.67303	2.9083	3.77179	3.51168	3.61661	3.15679	3.10575	3.92029	4.19018	3.13716	3.54607	3.11992	3.67459	4.06389	4.34872	2.79189	3.36224	4.07495
ENSG00000092621	11.6089	11.7088	11.6546	11.7415	11.7781	11.8167	11.8757	11.7645	11.6684	11.8399	11.8621	11.8176	11.8027	11.7014	11.9181	11.9055	11.8371	11.9193	11.8933	11.8496	11.1855	11.1801	11.1908
ENSG00000092820	11.6143	11.5817	11.6228	11.6228	11.5462	11.6158	11.5522	11.5982	11.597	11.5372	11.5508	11.6285	11.5927	11.6545	11.5033	11.5001	11.5646	11.4726	11.5031	11.4365	11.7685	11.7808	11.7518
ENSG00000092841	13.2157	13.2072	13.2628	13.1048	13.1579	13.172	13.1608	13.1956	13.1418	13.152	13.2107	13.1814	13.1665	13.2116	13.2774	13.2315	13.2467	13.2486	13.2016	13.1378	13.1356	13.0856	13.0957
ENSG00000092847	10.0851	9.9822	9.99189	9.9331	10.0183	9.92353	9.92755	10.0283	10.0188	9.85052	9.981	10.0494	9.98732	9.94045	9.86291	9.99373	10.0249	9.9291	9.86725	9.99243	9.87337	9.86126	9.78895
ENSG00000092853	4.80048	4.16687	4.72539	4.67783	4.00662	3.68155	3.27447	3.97901	4.69898	3.61661	2.57265	4.50706	4.01346	4.40124	4.05274	4.04751	4.45167	3.90457	4.18761	3.59351	3.68378	4.17149	4.13278
ENSG00000092871	9.84415	9.88757	9.89015	9.84506	9.95834	9.90422	9.76262	9.9658	9.92459	10.0651	9.84942	9.99664	9.95539	10.0528	10.117	10.0384	9.93216	10.2332	10.1856	10.1922	10.1484	10.1594	10.2217
ENSG00000092929	5.21769	5.39894	5.81495	5.47263	5.39921	5.14638	5.36207	5.11926	4.91341	5.3084	5.4774	5.40268	4.92077	4.79911	4.85048	5.00322	5.08626	4.78034	5.11667	4.88757	5.96522	6.2487	5.94616
ENSG00000092931	8.33718	8.43081	8.19612	8.29901	8.31538	8.39475	8.30159	8.25679	8.37008	8.39131	8.12482	8.23357	8.43217	8.31421	8.57736	8.34566	8.44419	8.40042	8.46323	8.50615	8.75759	8.75198	8.76338
ENSG00000092964	7.79295	7.92667	7.94181	8.27226	8.05688	8.31903	8.12229	8.04838	8.10155	8.05831	8.06208	7.8945	7.93316	7.93922	7.73239	7.77789	7.86357	7.44787	7.38569	7.44668	8.93181	9.03545	8.92758
ENSG00000092969	9.82216	9.36334	9.59725	9.30318	8.95944	8.95377	8.8508	9.16957	9.19485	8.91789	9.05528	8.8274	9.04569	9.25995	9.06072	8.95026	8.87867	8.67447	8.64889	8.70153	9.16647	9.22196	9.23507
ENSG00000092978	7.86701	7.73487	7.93147	7.86102	7.88355	7.7556	7.76759	7.70612	7.92132	7.75933	7.74683	7.77788	7.80219	7.84613	8.1035	7.92347	8.03053	7.73366	7.87418	7.86156	7.67203	7.84543	7.69412
ENSG00000093000	9.84946	9.78622	9.86087	9.81735	9.89308	9.82945	9.87351	9.81007	9.90886	9.76223	9.79223	9.84407	9.886	9.936	9.91541	9.85471	9.87744	9.90115	9.92163	9.8612	9.96613	10.0704	10.0576
ENSG00000093009	2.77413	2.21247	3.99286	3.65243	3.1762	3.26368	2.9083	3.97901	3.51168	2.89487	3.30863	2.91102	2.33342	3.26713	2.11834	2.9629	3.29167	1.97903	3.77919	3.21777	2.6287	2.03367	2.98051
ENSG00000093010	8.13622	8.33662	8.24702	7.93112	8.25496	8.51839	8.53462	8.11028	8.41035	8.55459	8.51273	8.30967	8.26224	8.33148	8.09176	8.10742	8.0841	7.83473	7.72899	7.99276	6.66862	6.4536	6.69628
ENSG00000093072	8.62018	8.45591	8.42703	8.39515	8.35133	8.29453	8.37412	8.35767	8.37461	8.45224	8.41152	8.35348	8.36746	8.30986	8.23733	8.44145	8.38376	8.32631	8.40706	8.29354	8.50457	8.09849	8.20948
ENSG00000093134	5.17167	5.12614	5.51611	5.1588	5.39921	5.62641	5.24317	5.43286	4.75565	5.84123	5.37789	5.16114	5.26191	4.89519	4.39587	4.714	4.65416	4.85558	4.88038	5.31287	5.94802	5.86413	5.86318
ENSG00000093144	9.59892	9.69646	9.61939	9.65878	9.74514	9.76314	9.74995	9.69359	9.70296	9.70232	9.65234	9.69184	9.78087	9.81249	9.7082	9.70408	9.86573	9.61271	9.58591	9.64382	9.63347	9.53401	9.61091
ENSG00000093167	9.84048	9.98047	9.98191	9.88755	10.0322	10.0372	10.0492	9.94742	9.87109	9.97109	10.0767	9.95617	9.91521	9.92773	9.90877	10.0074	10.055	9.90606	9.8345	9.8726	9.64285	9.56528	9.6973
ENSG00000093183	8.79729	8.82695	8.70705	8.77458	8.79821	8.87961	8.78571	8.79121	8.92453	8.68443	8.79582	8.8782	8.74564	8.8933	8.72139	8.75203	8.73212	8.77939	8.8455	8.82068	8.79175	8.86401	8.81507
ENSG00000093217	8.05617	7.96914	7.92106	8.19601	8.44167	8.51415	8.3694	8.34836	8.2715	8.27619	8.2936	8.35348	8.28577	8.29672	8.38406	8.40885	8.43506	8.25862	8.28422	8.43871	7.48785	7.26118	7.2343
ENSG00000094631	10.7681	10.8794	10.7827	10.8956	10.9554	11.0512	11.0792	10.8957	10.9169	11.0035	10.988	10.8421	10.9152	10.7488	10.8742	10.8652	10.7746	10.7037	10.7446	10.7726	10.2546	10.1711	10.1421
ENSG00000094804	5.77436	5.4795	5.33974	5.60717	5.00684	5.42445	5.15808	5.90871	5.41355	5.05263	4.8926	5.40268	5.22342	5.49489	5.47396	5.08803	4.83169	5.63075	5.34644	5.01653	4.82806	4.85051	4.93727
ENSG00000094841	6.22094	6.78189	6.36854	6.90254	6.3289	6.51326	6.41946	6.88382	6.72924	6.53509	6.11471	6.68888	6.67243	6.43153	6.79811	6.52783	6.71987	6.76013	6.67364	6.75519	6.85554	6.64418	6.9586
ENSG00000094880	9.51618	9.52438	9.55856	9.55716	9.6581	9.75957	9.62474	9.57089	9.5023	9.54025	9.65766	9.62788	9.60492	9.59905	9.6272	9.61578	9.58935	9.54044	9.47491	9.5296	9.28689	9.29377	9.29516
ENSG00000094914	9.12462	9.28761	9.24464	9.33923	9.31539	9.35282	9.26665	9.12139	9.30521	9.24736	9.18246	9.28746	9.27643	9.22217	9.25086	9.18641	9.11042	9.1026	9.24143	9.19687	9.33732	9.29554	9.34647
ENSG00000094916	10.809	10.6647	10.733	10.8397	10.8351	10.8167	10.8769	10.7353	10.8206	10.856	10.6318	10.7952	10.8031	10.7774	10.7035	10.6493	10.7249	10.5879	10.5941	10.6203	10.6506	10.6709	10.5396
ENSG00000094975	10.0489	9.91137	9.9541	9.91158	9.83519	9.86815	9.82433	9.88441	9.9702	9.83789	9.77313	10.0134	9.90004	10.0606	9.9071	9.91756	9.88598	9.91818	9.87763	9.93648	11.3278	11.5598	11.6391
ENSG00000095002	7.27791	7.28614	7.37512	7.51805	7.37334	7.47949	7.45626	7.31505	7.77135	7.53983	7.31622	7.4324	7.37182	7.43917	7.45858	7.36716	7.47531	7.42952	7.36618	7.15137	7.58566	7.75532	7.69412
ENSG00000095015	9.05028	8.96276	8.97958	8.94095	8.95541	9.00571	9.02976	8.96572	9.2297	9.02918	8.99926	9.0858	9.13327	9.1363	8.85581	8.97441	9.03081	8.96284	8.82897	9.10074	9.07341	9.26684	9.1275
ENSG00000095059	8.53178	8.59127	8.81729	8.51872	8.59564	8.6884	8.58251	8.58338	8.62271	8.67503	8.7808	8.63933	8.71452	8.72258	8.7382	8.67369	8.74511	8.80204	8.71983	8.64609	8.99715	9.00927	9.11397
ENSG00000095066	9.75919	9.92041	9.72341	9.70203	9.75859	9.86981	9.82605	9.67323	9.78352	9.7381	9.91301	9.62986	9.6779	9.56111	9.63934	9.76331	9.60979	9.60863	9.97315	9.77722	9.13172	8.93185	9.06017
ENSG00000095139	11.4493	11.4328	11.4629	11.4948	11.4644	11.4849	11.5083	11.507	11.5642	11.4193	11.4198	11.5211	11.5057	11.6034	11.4855	11.4913	11.5693	11.4435	11.4523	11.4664	11.5849	11.7036	11.7827
ENSG00000095203	10.231	10.4277	10.3227	10.3558	10.5511	10.5928	10.7029	10.3683	10.3793	10.3967	10.4801	10.46	10.4174	10.327	10.4259	10.3466	10.3758	10.2646	10.2004	10.1911	10.0551	9.94743	10.1173
ENSG00000095209	7.63236	7.50401	7.52701	7.42394	7.55392	7.63589	7.69394	7.43423	7.37895	7.55225	7.60734	7.7121	7.52207	7.86405	7.38356	7.71261	7.76496	7.641	7.49752	7.61907	8.23703	8.45399	8.51964
ENSG00000095261	9.66891	9.57568	9.61132	9.60082	9.77524	9.75239	9.66385	9.73347	9.63284	9.67417	9.66119	9.70129	9.70259	9.56111	9.74238	9.54066	9.6199	9.65281	9.65453	9.65046	9.63347	9.55642	9.61091
ENSG00000095303	6.3297	5.76312	6.17181	6.19654	6.21642	6.46137	6.30538	6.43378	6.26606	6.2601	5.96273	5.84599	5.96832	5.69502	5.47396	5.35086	5.5595	5.37352	5.5446	5.64092	3.84118	3.56445	4.18838
ENSG00000095319	9.71375	9.59841	9.72191	9.67419	9.72622	9.59276	9.57227	9.62007	9.60612	9.61618	9.547	9.56509	9.53004	9.65673	9.57337	9.74384	9.84519	9.716	9.6955	9.71207	9.61859	9.73205	9.72105
ENSG00000095321	10.4432	10.6188	10.5916	10.7198	10.7443	10.7243	10.7708	10.6507	10.6921	10.6402	10.7974	10.669	10.72	10.5546	10.5986	10.5759	10.5905	10.5373	10.4883	10.4763	10.0144	9.90266	9.91481
ENSG00000095380	9.08173	8.90194	8.96698	9.04341	9.0487	9.0503	9.04168	9.00476	9.04878	9.04685	9.24263	8.93377	8.98587	9.1727	9.21344	8.98274	8.9846	9.03137	9.04069	8.92842	9.85963	9.85525	9.86236
ENSG00000095383	8.4809	8.45591	8.31221	8.33824	8.38642	8.61653	8.42963	8.39432	8.33796	8.42548	8.56268	8.55036	8.53395	8.34004	8.48619	8.4812	8.3885	8.48578	8.44164	8.33535	7.85393	7.83569	7.85739
ENSG00000095397	7.44197	7.49435	7.44218	7.37449	7.37334	7.49677	7.18235	7.50297	7.57276	7.58889	7.50886	7.22793	7.20408	7.28809	7.06139	7.26157	7.26462	7.32088	7.22889	7.50646	7.344	7.39981	7.46004
ENSG00000095485	7.48963	7.47483	7.57429	7.67948	7.62173	7.62807	7.54271	7.31505	7.85153	7.68229	7.86179	7.7121	7.6142	7.53176	7.58114	7.73907	7.69782	7.71862	7.75922	7.61229	7.56324	7.76048	7.81827
ENSG00000095539	11.404	11.6605	11.5032	11.7627	11.8608	11.9324	11.9296	11.7575	11.6944	11.894	11.8717	11.654	11.6881	11.5459	11.4961	11.5359	11.466	11.2135	11.1933	11.1512	9.29031	9.04816	9.03953
ENSG00000095564	9.97046	9.92581	9.92963	9.95429	9.99432	10.0736	9.96247	9.97491	9.8902	9.93833	9.9539	10.0405	9.92273	9.8976	10.0564	9.94766	9.93053	9.89273	9.90267	10.0119	9.8926	10.0212	10.0616
ENSG00000095574	8.27326	8.24741	8.36309	8.29237	8.48277	8.20272	8.35513	8.32482	8.37461	8.23053	8.47711	8.40064	8.29043	8.33577	8.26894	8.44145	8.35014	8.32631	8.36508	8.34357	8.08792	8.14654	8.43597
ENSG00000095585	4.97137	4.78944	4.51996	5.51888	5.39921	4.49254	5.02024	4.77469	4.75565	5.57513	4.7931	4.11301	4.10098	4.64182	4.73453	4.35189	4.37733	3.90457	4.18761	4.28186	4.04912	3.46689	3.31621
ENSG00000095587	3.79175	2.81922	2.83672	1.2909	2.59085	2.40658	1.66408	2.87372	2.36801	3.17748	2.57265	3.10575	2.81967	1.54457	1.07996	2.54965	2.10338	2.43654	1.69882	1.91374	2.6287	1.34893	2.15262
ENSG00000095596	6.45024	6.87418	6.50026	6.88498	6.82718	7.0111	7.02305	6.90937	6.53247	6.98341	6.92785	6.92657	6.75569	6.68103	6.54629	6.44985	6.79319	6.70515	6.54071	6.24282	5.94802	5.66273	6.04976
ENSG00000095637	9.97549	9.88017	9.795	9.85185	9.85567	9.96293	9.92433	9.81852	9.91684	9.95246	10.0187	9.95617	9.88162	9.93198	9.86118	9.76008	10.0801	9.87701	9.94712	9.82936	9.81525	9.65107	9.69129
ENSG00000095713	3.00157	2.21247	3.0039	4.08022	3.46585	2.67303	2.0887	3.52973	2.85667	4.09546	2.79469	1.66623	4.01346	2.75521	2.71588	3.54607	2.92492	2.22585	2.80535	2.70834	2.44467	2.03367	2.84868
ENSG00000095739	10.454	10.393	10.4826	10.3966	10.2633	10.1804	10.2982	10.4651	10.4038	10.3548	10.3754	10.2838	10.3204	10.4478	10.4012	10.4928	10.3136	10.3893	10.3336	10.2719	10.7711	10.6709	10.6383
ENSG00000095777	3.198	2.54751	2.83672	1.96111	2.32758	2.40658	3.27447	3.39154	1.62346	3.79447	2.79469	3.43059	2.33342	3.26713	3.30916	1.96826	1.06974	3.58899	2.64189	3.21777	3.07154	2.99323	3.66875
ENSG00000095787	11.0609	10.8701	10.8867	10.9065	10.8392	10.8338	10.8381	10.8186	10.8703	10.8796	10.864	10.9578	10.8947	10.9418	10.983	10.903	10.9093	10.9322	10.8349	10.9546	10.8924	10.9563	10.9592
ENSG00000095794	7.88137	7.68478	7.94695	7.98977	8.00138	8.01753	8.17196	8.3153	8.17611	7.94038	8.06208	8.02063	8.14359	8.18236	8.11514	8.07661	8.26508	8.08972	8.06779	8.13212	8.43527	8.43153	8.32562
ENSG00000095906	9.28989	9.38494	9.41012	9.3165	9.16692	9.03854	9.26156	9.27668	9.19938	9.31089	9.4261	9.0858	9.30895	9.28115	9.16387	9.32827	9.19672	9.48821	9.2871	9.17861	9.77557	9.69078	9.74095
ENSG00000095951	8.58988	8.47077	8.61316	8.50839	8.58069	8.66321	8.43416	8.56075	8.59249	8.51706	8.64346	8.63956	8.48192	8.45879	8.28963	8.48511	8.49781	8.359	8.19856	8.47282	8.3882	8.31371	8.27836
ENSG00000096060	10.4163	10.4566	10.4993	10.5381	10.5958	10.6158	10.7409	10.5273	10.4529	10.6917	10.6264	10.7703	10.7052	10.6203	10.6535	10.6735	10.7277	10.7751	10.6756	10.6603	10.9438	10.9427	10.8116
ENSG00000096063	10.2887	10.2976	10.3197	10.2118	10.3972	10.3386	10.2819	10.2051	10.3668	10.2385	10.2414	10.3916	10.4045	10.2889	10.3952	10.2929	10.4285	10.4136	10.4229	10.5474	10.6526	10.7624	10.6396
ENSG00000096070	10.7348	10.7934	10.7654	10.8283	10.7032	10.7261	10.7564	10.7173	10.8055	10.8076	10.7699	10.8049	10.7516	10.8482	10.7528	10.796	10.7881	10.7739	10.7313	10.7496	10.7875	10.8533	10.8802
ENSG00000096080	9.0343	8.96975	8.99703	8.96204	8.98146	9.06775	9.17488	9.10214	9.07128	9.08583	9.01038	8.89477	9.00017	9.02921	9.00403	8.97997	9.23669	9.24407	9.02003	9.02612	9.22217	9.28485	9.12572
ENSG00000096088	13.4485	13.5027	13.3096	13.4799	13.5848	13.6906	13.6793	13.6049	13.6444	13.6519	13.6916	13.5331	13.4992	13.4618	13.3446	13.2876	13.2996	13.2573	13.2222	13.1921	13.0697	12.9411	13.0197
ENSG00000096092	8.98859	8.95221	8.70705	9.03547	9.10244	8.98442	8.89163	8.98688	8.93069	9.01578	9.06739	9.0537	8.93319	9.20352	9.04416	8.9118	9.05486	8.75994	8.56942	8.96883	7.73357	7.57976	7.68449
ENSG00000096093	7.42245	7.394	7.5342	7.52939	7.32017	7.58022	7.41101	7.34344	7.64954	7.5273	7.46103	7.32892	7.39798	7.42314	7.68631	7.33282	7.54489	7.54198	7.57887	7.36829	7.69799	7.88846	7.76897
ENSG00000096384	13.7511	13.6565	13.7424	13.6563	13.6733	13.6681	13.6468	13.6944	13.7187	13.6836	13.6737	13.8374	13.7795	13.845	13.8835	13.8528	13.9448	14.0377	13.9847	13.9999	14.1517	14.1109	14.1319
ENSG00000096401	9.40623	9.40312	9.43777	9.31977	9.34244	9.39952	9.5071	9.49277	9.56112	9.47323	9.49303	9.44649	9.46761	9.37786	9.48642	9.48114	9.47814	9.45985	9.43645	9.28699	9.36189	9.48189	9.4958
ENSG00000096433	8.69121	8.52397	8.61961	8.21721	8.02384	8.05884	8.0355	8.29121	8.30036	8.19135	8.18002	8.63168	8.52211	8.6361	8.6351	8.75203	8.6035	9.17415	9.15879	9.108	11.2302	11.2302	11.1224
ENSG00000096654	7.11726	7.10755	6.95279	7.01977	6.92586	7.13771	6.87095	7.04232	7.19652	7.01965	6.9042	7.2487	6.82158	6.75971	6.82671	6.90038	6.99312	6.81771	6.83373	6.87343	6.95363	7.19416	7.22768
ENSG00000096696	13.107	13.1093	13.0807	13.2114	13.2073	13.2532	13.2372	13.1614	13.1442	13.1392	13.1592	13.2372	13.2629	13.2157	13.2471	13.1811	13.1728	13.1555	13.1123	13.1319	12.9112	12.986	12.941
ENSG00000096717	8.32147	8.27589	8.30822	8.23117	8.51087	8.08193	8.38352	8.39883	8.33331	8.21499	8.27066	8.27971	8.26697	8.41083	8.19956	8.44145	8.36465	8.31968	8.24203	8.31877	8.16812	8.3346	8.34716
ENSG00000096746	10.2738	10.2014	10.1429	10.2654	10.1932	10.1521	10.0697	10.0728	10.1606	10.2133	10.1898	10.1983	10.1654	10.1052	10.2964	10.2418	10.3698	10.332	10.3902	10.4025	10.6599	10.6852	10.754
ENSG00000096872	7.87421	7.86802	7.85697	7.90523	7.93777	7.81193	7.84449	8.04838	7.85802	7.85269	7.89217	7.94628	8.0587	7.85213	8.02546	7.75213	7.69016	7.844	7.78883	7.47688	7.30398	7.23178	7.47129
ENSG00000096968	7.55382	7.82242	7.65817	7.86102	7.63638	7.60434	7.54271	7.79103	7.67914	7.84261	7.77318	7.68187	7.73539	7.77846	7.98163	7.73907	7.79383	7.55332	7.72389	7.85582	8.09184	8.22697	7.99237
ENSG00000097007	10.6711	10.5907	10.6753	10.5338	10.4858	10.5948	10.4801	10.5528	10.5391	10.5362	10.5532	10.5989	10.5506	10.5155	10.5766	10.5369	10.5328	10.6922	10.655	10.6545	10.9268	10.9376	10.7372
ENSG00000097021	8.3052	8.56608	8.37458	8.55353	8.55779	8.50564	8.71672	8.41216	8.44952	8.58514	8.6995	8.53353	8.48192	8.54277	8.49957	8.46146	8.67895	8.50343	8.44475	8.49881	7.97778	7.91182	7.79159
ENSG00000097033	10.5617	10.5067	10.4905	10.5423	10.5826	10.6167	10.5338	10.6114	10.5168	10.5763	10.5767	10.612	10.5718	10.6132	10.6027	10.6309	10.644	10.523	10.545	10.5677	10.8913	11.0022	10.98
ENSG00000097046	5.21769	5.12614	5.06502	5.27117	5.09431	4.49254	4.50405	4.82924	5.00975	4.98091	4.8926	4.50706	5.01391	4.98526	4.85048	4.81699	5.03881	4.89177	5.05301	4.74594	5.43357	5.68046	5.58106
ENSG00000097096	7.31013	7.05594	6.95279	7.20093	7.09447	7.10426	7.22481	6.95915	7.34241	7.05501	7.44473	7.11934	7.03661	7.14885	7.01244	7.19621	7.05405	6.9351	6.83373	6.89596	6.06436	6.4279	6.50152
ENSG00000099139	9.36593	9.10286	9.21937	9.34245	9.03219	8.99054	9.02376	9.04853	9.12604	9.03804	8.96538	9.20218	9.23592	9.27223	9.15826	9.20552	9.01557	9.258	9.35466	9.29124	9.13553	9.16359	9.15741
ENSG00000099194	15.4899	15.5134	15.3911	15.6104	15.7722	15.9301	15.8754	15.6183	15.7447	15.7292	15.8102	15.4917	15.5325	15.5204	14.915	14.8182	14.9216	14.4117	14.3606	14.4802	13.7622	13.6295	13.6382
ENSG00000099203	8.3984	8.50965	8.5368	8.57558	8.4291	8.25952	8.56799	8.45195	8.44952	8.573	8.46099	8.41908	8.45726	8.39859	8.29476	8.32834	8.34039	8.52376	8.4571	8.37197	8.76006	8.84714	8.85212
ENSG00000099204	11.4451	11.4073	11.4394	11.5142	11.3273	11.3624	11.3662	11.3752	11.3888	11.3156	11.3411	11.4073	11.3402	11.3679	11.3815	11.3557	11.3548	11.3298	11.3816	11.4451	11.1581	11.1811	11.1586
ENSG00000099219	10.3494	10.3601	10.3501	10.3935	10.4469	10.2445	10.3791	10.3877	10.4016	10.2876	10.2901	10.4678	10.4573	10.5174	10.6181	10.4723	10.4937	10.528	10.4625	10.5607	10.3469	10.3519	10.2813
ENSG00000099246	10.3061	10.2808	10.395	10.3284	10.3745	10.3529	10.3768	10.3392	10.3276	10.2708	10.3328	10.4544	10.3397	10.5079	10.4877	10.4604	10.4626	10.379	10.4221	10.5241	10.9892	11.1743	11.2249
ENSG00000099250	10.9062	10.6701	10.7992	10.5395	10.5109	10.4156	10.4378	10.6555	10.6766	10.5471	10.3439	10.5338	10.5132	10.7727	10.5787	10.5713	10.5445	10.6333	10.4815	10.515	10.8692	10.8575	10.8455
ENSG00000099256	3.5252	4.78944	4.46368	3.80955	4.32864	4.26934	4.75645	4.59743	4.05385	3.79447	3.30863	4.01942	3.7137	4.46525	4.05274	4.714	4.03446	4.54105	4.98642	4.34872	4.66915	5.06574	5.49548
ENSG00000099260	9.99379	10.1031	9.91528	10.0361	10.0785	10.2445	10.2372	10.1418	10.1301	10.2633	10.0859	10.0974	10.071	10.0344	10.1372	10.1136	10.0772	9.8416	9.94603	10.0119	8.49868	8.3102	8.38632
ENSG00000099282	8.53188	8.18871	8.29215	8.34467	8.00138	8.19215	8.0355	8.19581	8.1552	8.40507	8.11969	8.24911	8.19918	8.34004	8.21046	8.23843	8.13575	8.72275	8.34196	8.4194	8.57911	8.53445	8.38929
ENSG00000099284	8.73932	8.67273	8.70705	8.43188	8.67947	8.65938	8.62459	8.6694	8.69022	8.75061	8.4851	8.61578	8.62165	8.704	8.74031	8.58334	8.51525	8.71266	8.66832	8.40769	8.5509	8.57306	8.36234
ENSG00000099290	10.0153	9.99865	9.96504	9.84444	10.0069	10.0893	9.92618	9.94398	9.86263	9.94185	10.0075	9.96303	10.0333	9.86653	10.0625	10.0535	10.0033	10.0929	10.0577	10.017	10.3536	10.4509	10.4103
ENSG00000099308	8.45712	8.72736	8.62924	8.66057	8.75524	8.89599	8.91775	8.67314	8.51254	8.73979	8.8118	8.63168	8.58417	8.44298	8.68671	8.71251	8.5871	8.48578	8.63066	8.37598	8.26161	8.24915	8.10501
ENSG00000099326	8.40835	8.45591	8.55037	8.37013	8.13632	8.24936	8.23044	8.22153	8.32397	8.26868	8.14008	8.21785	8.17921	8.18711	8.24265	8.40472	8.34039	8.48874	8.58638	8.6882	8.46581	8.42505	8.62162
ENSG00000099330	8.25682	8.36341	8.20901	8.61338	8.37336	8.70098	8.51337	8.50319	8.39259	8.30584	8.28904	8.48184	8.51814	8.35279	8.50842	8.27054	8.46678	8.2447	8.25269	8.40769	7.73858	7.7187	7.81827
ENSG00000099331	10.998	10.9305	10.9843	10.869	10.7636	10.7578	10.8517	10.9163	10.8751	10.8943	10.9582	10.9203	10.9257	10.7884	10.836	10.8898	10.8227	10.9739	11.0463	10.9891	11.0994	11.0572	11.0069
ENSG00000099337	3.37086	3.84069	3.41343	3.47608	4.17659	3.79768	3.10297	3.39154	4.14152	4.09546	3.79363	3.81178	3.33486	3.85002	3.60168	3.86728	3.9343	3.83191	4.24571	2.70834	7.84	8.17385	8.08684
ENSG00000099338	4.21116	4.58615	3.99286	4.50476	4.65063	4.26934	4.3591	4.53315	5.14318	4.45436	4.15596	3.91933	4.40599	4.58533	4.9578	4.48295	4.83169	4.89177	5.44892	4.97481	4.39219	4.50215	3.8861
ENSG00000099341	10.6429	10.5713	10.6472	10.681	10.6804	10.5552	10.6533	10.6639	10.6291	10.6446	10.5916	10.5949	10.6281	10.6412	10.7611	10.5537	10.6705	10.7308	10.6657	10.5633	11.2046	11.2624	11.1976
ENSG00000099364	8.21206	8.28712	8.2636	8.18171	7.55392	7.76989	7.67109	7.941	8.12325	8.11803	7.92191	8.04458	8.30433	8.04773	7.94948	8.21975	7.99989	8.27584	8.28422	8.22846	8.67111	8.68033	8.79953
ENSG00000099365	5.34753	5.62827	5.51611	5.80681	5.36444	5.96129	5.8699	5.85713	5.34133	5.66939	6.09395	5.7904	5.40633	4.89519	5.70717	5.86513	5.8342	5.56502	5.49756	5.614	4.49054	4.17149	4.83646
ENSG00000099377	9.18667	9.36652	9.32581	9.20066	9.41432	9.47994	9.5242	9.30102	9.29329	9.29249	9.40309	9.23638	9.16154	9.22448	9.14412	9.10734	8.96252	8.97765	8.87571	8.96084	8.3786	8.17385	8.20948
ENSG00000099381	9.52078	9.42108	9.52286	9.44184	9.30396	9.22122	9.37431	9.41241	9.31702	9.42338	9.33838	9.38684	9.2951	9.2767	9.0593	9.34345	9.37206	9.37129	9.29916	9.35157	9.145	9.18867	9.1132
ENSG00000099385	8.58111	8.55218	8.43071	8.34467	8.52668	8.25952	8.51337	8.54453	8.50429	8.5107	8.53984	8.36779	8.48599	8.40268	8.44066	8.56126	8.26508	8.5941	8.48751	8.35174	8.53081	8.43476	8.39521
ENSG00000099617	7.15323	7.55137	7.62006	7.56289	7.67236	7.54742	7.71643	7.6466	7.59623	7.51465	7.69953	7.651	7.72853	7.1778	7.67062	7.69243	7.33505	7.62496	7.73407	7.61229	7.29721	7.30418	7.11024
ENSG00000099622	11.0688	11.1479	11.1406	11.2182	11.2353	11.1542	11.1518	11.1432	11.1092	11.1487	11.1426	11.1405	11.1862	11.0085	11.2517	11.1894	10.995	11.17	11.1724	11.127	10.8304	10.702	10.7066
ENSG00000099624	9.43085	9.58253	9.59176	9.59544	9.61068	9.61865	9.79292	9.67696	9.60804	9.54958	9.8197	9.29497	9.68322	9.51081	9.43858	9.75523	9.49142	9.71726	9.57462	9.44046	9.70946	9.39339	9.41944
ENSG00000099625	6.07859	6.3392	6.02398	5.73024	5.2548	4.80159	4.43339	5.50166	5.05561	5.24858	5.11492	5.50981	6.08023	5.72147	5.79663	6.12804	6.26369	6.53833	5.96348	6.01481	7.51732	7.20176	7.24745
ENSG00000099769	5.34753	6.00003	5.20891	5.27117	5.43316	5.74689	5.97314	6.07597	5.05561	5.88118	5.86811	5.32658	5.44029	5.22598	4.73453	4.65962	4.58977	5.21113	4.24571	4.79471	2.79189	2.28335	2.54223
ENSG00000099783	10.9486	10.8813	11.0042	10.9796	10.8071	10.8632	10.8492	10.8893	10.9292	10.9257	10.9387	10.831	10.9758	10.9227	10.8946	10.9008	10.9306	11.0176	10.942	10.958	11.136	11.0189	11.0112
ENSG00000099785	9.80888	9.95252	9.80211	9.96268	9.93483	9.90907	9.82777	9.91311	9.91529	9.8705	9.93651	9.82401	9.87232	9.81095	9.76472	9.75036	9.72855	9.75705	9.77162	9.64881	9.09507	8.96126	8.84565
ENSG00000099795	9.59457	9.76637	9.64808	9.76815	9.6491	9.6363	9.85168	9.7477	9.56707	9.59832	9.85096	9.62986	9.67076	9.75923	9.56278	9.66493	9.52839	9.70841	9.59571	9.535	9.6811	9.4662	9.49028
ENSG00000099797	10.0374	10.0861	10.0305	10.0626	10.278	10.1872	10.2613	10.1647	10.056	10.1934	10.2365	10.0408	10.0941	9.97974	9.964	9.89549	9.97853	9.84838	9.67903	9.64982	9.69937	9.56943	9.53538
ENSG00000099800	9.46464	9.44385	9.49329	9.41151	9.43122	9.16286	9.40694	9.44989	9.49816	9.43349	9.51271	9.59379	9.36306	9.56842	9.57758	9.45143	9.39108	9.65938	9.55321	9.5332	9.75098	9.59445	9.64361
ENSG00000099804	10.2324	10.0839	10.2075	10.1359	10.0432	9.85983	9.99196	10.0443	9.98361	10.0824	10.1171	10.1159	10.0353	10.0913	10.0413	10.1646	10.099	10.2244	10.126	10.1043	10.708	10.5753	10.5302
ENSG00000099810	9.22708	9.30706	9.18715	8.99104	9.02385	9.05905	9.04465	9.1049	9.14643	9.10703	8.90112	9.18072	9.08847	9.22679	9.31029	9.10734	9.11042	9.28377	9.23964	9.19816	9.34556	9.37669	9.34309
ENSG00000099814	11.5124	11.3259	11.3525	11.3631	11.1745	11.1731	11.1811	11.2768	11.3294	11.3692	11.3273	11.3137	11.4024	11.2637	11.2576	11.3211	11.3223	11.5443	11.5142	11.5985	11.9377	11.864	11.7685
ENSG00000099817	10.6773	10.6871	10.6257	10.5932	10.5491	10.6965	10.6445	10.7146	10.6994	10.7602	10.7617	10.6709	10.651	10.5865	10.5317	10.6554	10.5466	10.7377	10.599	10.5563	10.6204	10.53	10.4955
ENSG00000099821	10.3103	10.3776	10.3327	10.3245	10.2672	10.2642	10.2697	10.3933	10.2916	10.369	10.3767	10.2904	10.3316	10.2619	10.3173	10.4164	10.2913	10.5016	10.351	10.2258	10.2062	10.0017	10.0017
ENSG00000099822	4.11717	4.78944	4.14375	3.65243	4.00662	4.00518	3.56627	3.39154	3.96051	2.54308	3.98614	3.56915	4.26153	3.52913	4.23448	3.54607	3.9343	3.90457	4.24571	3.89134	3.30569	2.99323	3.21276
ENSG00000099834	2.77413	4.26104	3.1537	3.65243	2.32758	4.09871	3.42774	2.38397	4.22417	2.89487	3.446	3.91933	3.18269	3.40407	1.69063	2.9629	3.82667	3.49799	3.8558	4.06043	1.68796	1.73155	2.36053
ENSG00000099840	6.35051	6.66619	6.17181	5.94874	6.41637	6.91151	6.38243	6.83133	6.18585	6.37646	6.37771	6.36665	6.38922	6.33204	5.98603	6.22486	6.04098	5.81167	6.21686	5.99407	4.93673	4.50215	4.34337
ENSG00000099849	9.29527	9.37181	9.39703	9.36479	9.12339	9.29223	9.21493	9.34848	9.33573	9.26256	9.47909	9.26215	9.43008	9.30976	9.21615	9.44743	9.33326	9.34052	9.4855	9.14843	9.41294	9.40001	9.26638
ENSG00000099860	8.53642	8.6982	8.60992	8.6187	8.47871	8.59663	8.57211	8.47352	8.2321	8.43892	8.62188	8.44181	8.51416	8.32287	8.38886	8.18166	8.2126	7.98051	7.9284	7.72353	7.24885	7.44534	7.50999
ENSG00000099864	9.33234	9.32079	9.34346	9.42676	9.4562	9.56434	9.54739	9.36242	9.36562	9.52142	9.61459	9.40777	9.49614	9.4587	9.3453	9.42315	9.23931	9.37769	9.33138	9.11282	8.24057	8.07384	7.87444
ENSG00000099866	3.00157	4.26104	3.82432	4.19863	3.91348	4.42191	4.92043	3.87912	4.30233	4.09546	3.79363	4.63878	3.82069	4.33426	3.60168	4.35189	3.58383	4.27719	3.8558	3.89134	3.84118	3.82288	3.58836
ENSG00000099869	7.98479	8.19469	8.00232	8.29237	8.37336	8.39475	8.34554	8.42564	8.04014	8.51706	8.4731	8.18051	8.20413	7.93922	7.5895	8.02914	7.70543	7.41715	7.53295	7.39225	6.2583	5.80547	6.03982
ENSG00000099875	11.4815	11.5116	11.5014	11.429	11.3023	11.3665	11.3932	11.4467	11.4088	11.4635	11.5432	11.4517	11.5345	11.4453	11.4125	11.4972	11.4024	11.6315	11.5139	11.424	12.5062	12.4754	12.466
ENSG00000099889	10.4552	10.5198	10.5381	10.2972	10.0972	10.0722	10.1071	10.1525	10.2957	10.2443	10.297	10.3454	10.4901	10.3313	10.4775	10.4928	10.3407	10.8477	10.8068	10.8131	11.2109	11.0493	11.0122
ENSG00000099899	9.01814	8.87985	8.95172	9.08243	8.88049	8.78429	9.06524	8.86487	9.02304	9.08155	9.07005	8.79592	8.94506	8.80948	8.97877	9.05035	8.97518	9.13316	9.03452	8.99776	9.79735	9.83462	9.76743
ENSG00000099901	9.30971	9.33944	9.41858	9.31532	9.42995	9.21768	9.37664	9.25311	9.33889	9.3466	9.39817	9.25007	9.29501	9.34185	9.37883	9.37267	9.35918	9.47961	9.44869	9.40829	9.67539	9.67943	9.6318
ENSG00000099904	9.57923	9.6602	9.61778	9.55716	9.53648	9.55406	9.6108	9.57887	9.69211	9.39951	9.7267	9.55679	9.52411	9.47045	9.37707	9.45742	9.51977	9.61406	9.60268	9.57219	9.39877	9.26865	9.28722
ENSG00000099910	8.61159	8.51444	8.72811	8.49688	8.54232	8.63616	8.64373	8.68346	8.69022	8.47199	8.69261	8.74931	8.79896	8.60447	8.58575	8.59787	8.61568	8.81517	8.72047	8.74824	8.54232	8.37886	8.40908
ENSG00000099917	10.4101	10.3826	10.3684	10.2414	10.1195	10.137	10.1254	10.2694	10.202	10.2423	10.2752	10.1258	10.2551	10.2564	10.1443	10.2302	10.3198	10.3262	10.3919	10.4201	10.8055	10.8647	10.6886
ENSG00000099937	11.6213	11.84	11.7017	11.94	12.1975	12.251	12.2009	11.9335	11.8779	12.0195	12.1448	11.7997	11.8321	11.7512	11.6635	11.6401	11.5997	11.2041	11.1766	11.1175	9.93252	9.82111	9.85271
ENSG00000099940	9.79946	9.69436	9.84267	9.76815	9.78348	9.82261	9.87019	9.93193	9.88386	9.91206	9.93506	9.84291	9.84565	9.91918	9.93692	9.84935	9.8843	9.83812	9.85331	9.79681	10.1447	10.0781	10.0457
ENSG00000099942	10.6763	10.5713	10.6629	10.7024	10.6688	10.6068	10.6149	10.7219	10.7586	10.7722	10.7208	10.7229	10.7157	10.6541	10.6425	10.6692	10.62	10.6192	10.4988	10.5528	10.4605	10.4186	10.462
ENSG00000099949	10.5867	10.5816	10.6413	10.6213	10.4761	10.5186	10.5958	10.591	10.6204	10.5971	10.6542	10.5926	10.5716	10.562	10.4999	10.6271	10.5329	10.6948	10.5869	10.5742	10.5014	10.5355	10.5494
ENSG00000099953	8.93105	9.04448	8.92852	9.13536	9.20426	9.24187	9.20701	9.18814	9.05726	9.02918	9.13499	8.84107	8.83769	8.902	8.93347	8.97719	8.72838	8.56917	8.6252	8.43486	7.74856	7.64255	7.47688
ENSG00000099954	8.07504	8.19469	8.25118	8.13049	8.25021	8.27963	8.07084	8.39883	8.25685	8.22278	8.24736	8.14217	8.26697	8.27902	8.31508	8.3152	8.31572	8.13572	8.39427	8.57757	8.22279	8.24547	8.23281
ENSG00000099956	10.4468	10.5103	10.4958	10.3779	10.4143	10.3764	10.3943	10.4586	10.4356	10.3898	10.401	10.4443	10.5612	10.4733	10.4154	10.3828	10.3781	10.485	10.521	10.4556	10.4205	10.2046	10.3176
ENSG00000099958	3.5252	4.51148	3.99286	4.75716	4.59173	3.41682	4.43339	4.16018	2.63293	4.34436	3.15679	3.91933	3.59813	3.64421	3.60168	3.13223	3.11992	2.92982	3.42414	2.70834	3.98308	3.89967	4.07495
ENSG00000099968	9.91219	9.78432	9.79643	9.71698	9.88203	9.83286	10.0057	9.85841	9.84847	9.7381	9.89662	9.84462	9.88007	9.99432	9.90039	9.9103	9.82785	10.031	9.81544	9.93919	10.0621	10.0935	10.0027
ENSG00000099974	6.1482	6.33205	6.06124	5.70525	6.26643	5.93439	5.51086	5.97892	5.261	6.18294	5.98409	6.04814	5.77511	5.90899	5.81416	6.03283	5.89222	6.28417	5.9231	5.67441	5.69186	5.0624	5.42524
ENSG00000099977	10.8166	10.9316	10.8148	10.7824	10.9799	10.9638	11.1014	10.9639	10.9262	11.0075	11.0562	10.9106	10.9693	10.8604	10.8805	10.9165	10.7332	10.9145	10.8386	10.7395	10.5555	10.4534	10.4494
ENSG00000099991	10.1324	10.2438	10.1169	10.2206	9.98147	10.1064	10.1709	10.1499	10.1619	10.2366	10.1489	10.0165	10.0505	10.0292	9.82974	10.0156	9.85207	10.0065	10.004	9.98325	9.93906	9.87559	9.81898
ENSG00000099992	7.69876	7.55137	7.40807	7.18308	7.12595	7.3109	7.43136	6.94686	7.39062	7.27004	7.45176	7.30928	7.22147	7.61975	7.30444	7.44149	7.32776	7.30069	7.34461	7.21089	8.09759	8.09934	7.96079
ENSG00000099994	3.79175	3.9578	4.07028	4.08022	4.39904	4.00518	4.11005	4.46588	4.37648	4.09546	4.23392	3.69556	3.92029	4.26402	4.47026	4.6031	4.29895	4.16335	4.50556	4.06043	3.98308	3.46689	3.81722
ENSG00000099995	10.8342	10.8409	10.9172	10.9021	10.9634	10.9395	10.8902	10.9265	10.8452	10.9459	10.943	10.9813	10.9837	10.9048	10.913	10.9971	10.9596	10.9516	10.9665	10.8916	10.7735	10.8222	10.8105
ENSG00000099998	3.45932	4.26104	3.44516	4.49831	4.44636	2.89786	3.48894	4.84574	3.34588	3.81936	3.83824	3.69556	3.39288	3.11581	2.11834	2.94482	3.07358	3.75539	2.91253	3.46682	4.43678	5.02587	4.50931
ENSG00000099999	8.38334	8.62483	8.5402	8.4499	8.47464	8.45347	8.41136	8.54045	8.59249	8.70126	8.6073	8.48184	8.44058	8.3821	8.31003	8.40885	8.43047	8.1876	8.5173	8.44636	7.67726	7.81105	7.80943
ENSG00000100003	7.33121	7.25215	7.03233	7.22902	6.6069	6.92434	6.81646	6.89665	6.85128	7.18834	6.93953	6.96473	7.15381	7.28809	7.48573	7.17698	7.02999	7.3984	7.16258	7.03439	8.29901	8.29251	8.22286
ENSG00000100014	10.6546	10.731	10.6551	10.6579	10.6337	10.5562	10.6883	10.6982	10.63	10.6212	10.6559	10.721	10.6823	10.76	10.7054	10.6247	10.635	10.6508	10.6245	10.6354	10.8007	10.8209	10.7705
ENSG00000100023	9.78997	9.97354	9.88729	9.7513	9.82239	9.92353	9.83464	9.76879	9.83538	9.91928	9.85714	9.93977	9.85983	9.72974	9.82088	9.8539	9.95949	9.82882	9.99343	9.92146	9.6811	9.75261	9.67314
ENSG00000100024	7.93056	8.05051	8.05088	7.97326	8.26913	8.26457	8.16107	8.00757	8.12862	8.13465	8.09379	7.72698	8.13843	7.80961	7.85546	7.95769	7.81511	7.71357	7.64513	7.63255	6.09595	5.88316	5.5389
ENSG00000100027	6.15152	6.25015	6.17181	5.76903	5.29228	6.16963	5.72951	5.39719	5.75673	6.29008	5.9162	5.87299	5.82146	6.22518	6.26211	6.20601	5.94129	6.16219	6.34198	5.90802	5.40863	5.06574	4.90445
ENSG00000100028	9.94988	9.66378	9.71978	9.84306	9.76359	9.66346	9.61222	9.5482	9.5555	9.56167	9.62938	9.74655	9.94285	9.69624	9.73198	9.80213	9.51267	9.72506	9.55635	9.69529	9.59852	9.61751	9.65108
ENSG00000100029	9.48124	9.57568	9.65752	9.51499	9.5029	9.38566	9.50495	9.52824	9.47935	9.4601	9.50093	9.68233	9.67255	9.59905	9.65537	9.57596	9.72106	9.90606	9.82619	9.76657	10.4437	10.4972	10.4543
ENSG00000100030	11.4997	11.485	11.4992	11.5291	11.6612	11.6905	11.5703	11.6134	11.5305	11.6229	11.5626	11.631	11.5369	11.6639	11.6022	11.6023	11.6155	11.6258	11.5413	11.6232	11.567	11.5288	11.5142
ENSG00000100031	10.3416	10.47	10.1871	10.3322	10.2448	10.2508	10.3108	10.3497	10.2695	10.6494	10.2892	10.4272	10.293	10.4645	10.1889	10.3509	10.5354	10.2633	10.2665	10.3142	9.7319	9.69352	9.81531
ENSG00000100033	8.5767	8.90923	8.63562	8.70626	8.84939	9.05322	9.17488	8.93496	8.71901	8.98861	9.07005	8.57935	8.75916	8.5316	8.6351	8.84635	8.67119	8.65854	8.71019	8.72326	7.65092	7.21685	7.19412
ENSG00000100034	8.59861	8.65982	8.61961	8.66571	8.61067	8.49277	8.62459	8.66566	8.70828	8.62686	8.79903	8.49927	8.78911	8.67384	8.7252	8.59425	8.63575	8.68972	8.58075	8.76364	8.71246	8.84957	8.80621
ENSG00000100036	4.38253	4.06612	4.46368	5.32423	4.09411	4.55988	4.11005	3.77179	4.63999	4.34436	4.50942	3.56915	4.47314	3.64421	4.79367	4.76641	4.83169	4.57305	4.55235	4.58888	5.19189	4.85051	4.39154
ENSG00000100038	9.12662	9.20709	9.18186	9.27667	9.06928	9.2029	9.08407	9.03699	9.25449	9.08583	9.23554	9.13683	9.10179	9.04149	9.02269	9.06088	9.19401	9.29683	9.23931	9.29548	8.94271	8.94097	8.98366
ENSG00000100056	7.66594	7.80689	8.06985	7.89649	7.57688	7.67438	7.73858	8.00757	7.84502	7.8627	7.9909	7.8746	7.78908	7.72716	7.90993	7.63015	7.93009	8.09749	7.89249	7.68524	8.33955	8.12271	8.10139
ENSG00000100060	4.97137	4.96759	5.30812	5.47263	5.91383	5.46014	5.32351	5.02891	5.22573	5.36584	5.68594	5.16114	4.87184	5.02828	4.67286	4.9131	4.29895	5.3214	5.0201	5.01653	5.99903	5.36555	5.88016
ENSG00000100065	10.5392	10.459	10.5132	10.4982	10.2668	10.3386	10.3978	10.4467	10.4335	10.4657	10.5098	10.4578	10.5399	10.4036	10.4236	10.4464	10.457	10.6199	10.5687	10.4763	11.0877	11.0038	10.9259
ENSG00000100075	11.6769	11.903	11.7848	11.986	12.0374	12.1579	12.1625	11.996	11.925	12.0798	12.198	11.8498	11.8649	11.8182	11.6763	11.7617	11.7486	11.6666	11.6006	11.5173	10.715	10.4429	10.4379
ENSG00000100077	8.22901	8.10231	8.25118	8.13049	8.13632	8.04128	8.08244	8.11028	8.13398	7.98688	8.04055	8.11979	8.05322	8.13395	7.88295	8.04514	8.11874	8.147	8.07982	8.09366	7.65092	7.77074	7.81386
ENSG00000100079	4.91662	5.12614	5.64822	5.87952	5.83983	5.68791	6.15979	5.50166	5.34133	5.57513	5.79283	5.40268	5.47346	5.72147	5.43734	5.28052	5.13219	5.21113	5.29234	4.88757	1.68796	2.03367	2.54223
ENSG00000100083	10.0329	10.0381	9.92963	9.98345	9.90943	9.9123	9.87353	9.93504	9.86949	9.88285	10.0104	9.9874	9.91521	9.91489	9.84205	10.0687	9.96267	10.0887	10.2402	10.1067	10.077	9.99742	10.0476
ENSG00000100084	9.81825	9.66236	9.7507	9.69952	9.69926	9.69176	9.69625	9.72734	9.62994	9.74082	9.79268	9.79311	9.80941	9.62402	9.75359	9.88475	9.82085	9.87362	9.86864	9.81883	9.5433	9.5697	9.65968
ENSG00000100092	6.69759	6.29536	6.65905	6.65578	6.3289	5.83324	6.34442	6.26594	6.34205	6.13353	6.68912	6.40417	6.29958	5.5369	6.13066	6.03348	6.30438	6.61308	6.55388	6.51437	7.10101	7.1333	6.84832
ENSG00000100095	3.198	2.54751	3.2894	2.76282	3.32828	2.89786	2.9083	2.87372	3.37366	3.41368	3.446	4.43639	3.01257	3.40407	2.44783	3.66127	2.69939	3.18448	2.95216	2.70834	3.19336	2.99323	2.54223
ENSG00000100097	4.29939	4.16687	3.99286	4.67783	4.46617	4.68579	4.50405	3.39154	3.8607	4.22527	3.6868	4.2009	4.10098	4.11236	4.23448	4.41891	4.98975	3.97374	4.24571	4.13808	5.66178	5.5436	5.11994
ENSG00000100099	9.82198	9.77238	9.77924	9.97932	9.9829	9.96137	10.0194	9.98545	9.93075	10.0389	9.93651	9.88166	9.93767	9.76082	9.82443	9.99648	9.87589	9.93345	9.92396	9.87968	9.73602	9.75548	9.75713
ENSG00000100100	8.5767	8.46583	8.44894	8.33824	8.28781	8.58455	8.63249	8.32007	8.37461	8.41871	8.46907	8.25426	8.2717	8.13395	7.78434	7.65817	7.70543	6.75031	6.91654	7.11342	5.22083	5.39237	4.93727
ENSG00000100104	9.02139	8.99395	8.99703	9.07084	9.23827	9.12445	9.2993	9.10214	9.11526	8.99773	9.04052	8.97798	8.94802	9.10651	9.13558	9.1936	9.2048	9.1407	9.00329	8.94201	9.19143	9.0097	9.15741
ENSG00000100105	9.13065	9.1312	9.09753	9.13906	9.0487	9.01174	9.12531	9.15915	9.18913	9.20471	9.08853	8.94654	9.23833	9.17987	9.14128	9.2453	8.94654	9.19964	9.07715	9.03629	8.87149	8.88068	8.77931
ENSG00000100106	9.66268	9.59841	9.62742	9.55439	9.40151	9.36228	9.40463	9.49066	9.53707	9.44019	9.58886	9.53158	9.45728	9.48981	9.59846	9.61221	9.34061	9.61406	9.56324	9.5475	9.96174	9.94177	9.80237
ENSG00000100109	9.45986	9.36122	9.4505	9.31977	9.37337	9.33611	9.31413	9.41018	9.48774	9.25498	9.36678	9.38918	9.37189	9.47434	9.41993	9.47328	9.43068	9.529	9.44112	9.45191	9.39718	9.4197	9.39158
ENSG00000100116	7.33121	7.36248	7.54068	7.39943	7.37334	7.36178	7.50875	7.35278	7.34241	7.63635	7.43651	7.52896	7.62161	7.50916	7.67062	7.56507	7.42083	7.53627	7.46731	7.30236	7.89491	7.81105	7.96079
ENSG00000100124	7.80807	7.85298	8.00232	7.84295	7.9554	7.94382	7.78188	8.05412	7.67914	8.08421	7.75347	7.92063	7.87228	7.7658	7.9166	7.88251	7.95587	7.85321	7.84629	7.62583	7.85393	7.87425	7.79607
ENSG00000100129	11.5445	11.5734	11.5917	11.4537	11.6532	11.6094	11.6005	11.5471	11.5626	11.5774	11.582	11.5346	11.5387	11.6187	11.6086	11.6156	11.6192	11.5919	11.4933	11.4674	11.5995	11.6079	11.5753
ENSG00000100138	9.6354	9.47366	9.5038	9.40229	9.38426	9.53954	9.42526	9.5012	9.52082	9.44686	9.53213	9.47321	9.58988	9.49365	9.54783	9.58328	9.67912	9.58396	9.55321	9.5296	9.92374	9.96541	9.88673
ENSG00000100139	9.97549	9.70067	9.85229	9.75613	9.51286	9.48428	9.5242	9.64309	9.66463	9.483	9.59071	9.73664	9.74905	9.84594	9.78854	9.68038	9.71729	10.2359	10.0557	10.0626	11.5845	11.6636	11.6316
ENSG00000100142	8.38334	8.58442	8.42703	8.40749	8.47464	8.32872	8.52191	8.65437	8.56104	8.59718	8.48111	8.22835	8.33172	8.62213	8.4636	8.53883	8.44419	8.49757	8.45094	8.24172	8.31292	8.3552	8.46441
ENSG00000100147	5.64562	5.62827	5.40095	5.60717	5.39921	5.35032	5.78732	5.24498	5.44835	5.66939	5.41182	5.54382	5.50589	5.98432	5.50968	5.20658	5.59274	5.77338	5.17763	5.20875	5.72375	6.07748	5.56013
ENSG00000100150	7.81557	7.71004	7.68303	7.86102	7.93777	7.94382	7.72385	8.00164	7.7782	7.98688	7.74683	7.95894	7.72165	7.9945	7.82743	7.88843	7.69782	7.59234	7.79371	7.96639	7.62409	7.89316	7.70369
ENSG00000100151	9.16335	9.21887	9.0929	9.13164	9.08119	9.03854	9.02676	9.18029	9.1684	9.0643	9.12479	9.14793	9.1742	8.99709	9.02578	9.24068	9.08144	9.24232	9.24143	9.34135	9.51432	9.43429	9.51087
ENSG00000100154	9.64385	9.67951	9.52801	9.63535	9.56547	9.56024	9.58455	9.59667	9.59451	9.48947	9.54365	9.53582	9.63456	9.5919	9.45699	9.48505	9.37445	9.45835	9.56752	9.69771	9.56034	9.56381	9.53252
ENSG00000100196	8.55446	8.68552	8.46336	8.76021	8.73156	8.83953	8.60864	8.76696	8.82543	8.573	8.66824	8.80296	8.83131	8.79086	8.85581	8.7324	8.9401	9.07728	9.01377	9.07876	10.5509	10.6838	10.6928
ENSG00000100197	3.72577	3.3413	4.09123	4.22454	4.08986	3.22105	3.58334	3.35927	3.47705	3.9971	2.33013	3.57442	3.58118	2.88256	4.28482	3.97365	3.05462	3.46762	3.60281	4.1305	3.15668	2.57317	3.87936
ENSG00000100201	13.0934	13.1773	13.1077	13.1408	13.1874	13.2163	13.2156	13.0817	13.1325	13.1619	13.1468	13.1398	13.1017	13.0383	13.124	13.1058	13.1235	12.9963	13.0706	13.1608	12.7134	12.6803	12.6745
ENSG00000100207	9.3531	9.30706	9.3609	9.35207	9.31993	9.2134	9.20965	9.45207	9.1917	9.26256	9.25436	9.39618	9.34301	9.39028	9.25349	9.31073	9.26015	9.35356	9.36289	9.37982	9.60219	9.6131	9.46095
ENSG00000100209	7.17671	7.35182	7.22238	7.44805	7.29242	7.24389	7.04692	7.1534	7.28581	7.48903	7.53219	7.22793	7.31805	7.18732	7.33462	7.11769	7.23335	6.96088	6.96922	7.21546	6.71003	6.34795	6.65741
ENSG00000100211	8.57228	8.57985	8.68568	8.47944	8.51483	8.41762	8.55972	8.57279	8.32865	8.6674	8.52053	8.64741	8.58037	8.46271	8.83485	8.58698	8.54102	8.59958	8.51435	8.39983	8.25113	8.20822	8.34716
ENSG00000100216	9.27365	9.35589	9.30794	9.27667	9.28782	9.14378	9.3092	9.28158	9.24957	9.26634	9.32286	9.21279	9.25751	9.25649	9.24027	9.24068	9.17493	9.23705	9.12049	9.11282	9.29712	9.10804	9.29199
ENSG00000100218	2.50398	1.77532	2.17339	1.2909	3.00618	1.05348	2.9083	3.39154	2.36801	3.41368	3.15679	1.66623	2.01078	2.27332	3.13716	2.54965	3.11992	2.43654	2.24608	2.48879	1.31112	1.73155	2.70357
ENSG00000100219	12.3	12.3606	12.3498	12.3903	12.4606	12.4779	12.4782	12.4538	12.3897	12.4396	12.4266	12.3867	12.4456	12.3987	12.3854	12.3667	12.3916	12.3291	12.343	12.2974	12.1639	12.0884	12.0999
ENSG00000100220	10.4743	10.4751	10.4861	10.3747	10.5472	10.4844	10.4333	10.5211	10.5075	10.522	10.4251	10.4067	10.4666	10.5454	10.6181	10.4801	10.4704	10.5186	10.4307	10.4754	10.8139	10.8849	10.931
ENSG00000100221	10.3128	10.2639	10.2466	10.3005	10.3558	10.1453	10.2031	10.3356	10.1711	10.3333	10.2787	10.2622	10.3642	10.3195	10.354	10.3691	10.3577	10.4953	10.492	10.4763	11.112	11.167	11.1406
ENSG00000100225	10.9158	10.9474	10.8733	10.9206	11.0127	11.0209	10.9943	10.959	10.9799	10.9956	10.9488	10.9982	10.9591	10.9868	10.9055	10.9653	11.0188	10.8768	10.9415	11.0456	10.912	10.824	10.839
ENSG00000100226	9.52536	9.34787	9.47384	9.29007	9.38209	9.33371	9.2993	9.31303	9.2471	9.50234	9.27064	9.41698	9.36085	9.5259	9.40579	9.28626	9.47591	9.49116	9.60822	9.50966	10.1295	10.2008	10.1244
ENSG00000100227	10.1005	10.2235	10.0858	10.1744	10.2562	10.1778	10.2098	10.2115	10.118	10.1656	10.1983	10.2597	10.1189	10.1485	10.2257	10.2267	10.1613	10.2464	10.1921	10.2676	10.078	10.0521	10.0076
ENSG00000100228	4.67415	4.58615	4.14375	3.65243	4.09411	3.09234	3.69266	3.87912	3.63764	2.89487	4.15596	3.69556	2.81967	3.64421	3.30916	3.42086	4.03446	3.40087	4.06389	3.79873	5.33112	4.88868	5.17603
ENSG00000100234	10.5301	10.3904	10.5509	10.2654	10.4037	10.3576	10.3056	10.359	10.2533	10.2614	10.3537	10.3963	10.4056	10.4655	10.4247	10.3932	10.3136	10.1884	10.0342	10.1318	10.005	10.2428	10.1614
ENSG00000100239	10.8005	10.8785	10.7617	10.8225	10.7367	10.788	10.8373	10.8812	10.9075	10.8472	10.9372	10.7386	10.799	10.7383	10.7378	10.8171	10.6831	10.8298	10.8519	10.7734	10.5097	10.2529	10.3853
ENSG00000100241	11.525	11.5217	11.4763	11.4796	11.3352	11.3595	11.3868	11.444	11.4432	11.4269	11.4989	11.4399	11.5037	11.3974	11.3923	11.4393	11.3824	11.5539	11.5201	11.4584	11.7024	11.7367	11.6682
ENSG00000100242	11.1848	11.2915	11.1506	11.2614	11.1694	11.1958	11.3483	11.2307	11.1815	11.3192	11.3904	11.2482	11.2829	11.2145	11.1436	11.2823	11.1334	11.2593	11.2121	11.0625	10.8456	10.7929	10.736
ENSG00000100243	13.1807	13.3407	13.2779	13.328	13.4167	13.5376	13.486	13.362	13.3253	13.4613	13.5121	13.2903	13.3436	13.2099	13.1802	13.2715	13.2275	13.2288	13.1931	13.0651	12.9551	12.7846	12.792
ENSG00000100246	7.00366	7.15738	7.28867	7.37449	7.0731	7.30404	6.87095	7.34344	6.86422	7.28083	7.42824	7.09661	7.28105	7.41506	6.9746	7.15748	7.02999	7.22483	7.22168	7.14197	7.35056	7.17112	7.0664
ENSG00000100253	2.77413	2.54751	3.2894	3.27513	2.59085	2.0795	2.0887	2.05824	2.04324	3.41368	3.30863	2.41891	2.81967	1.95448	2.71588	2.54965	4.29895	3.18448	4.06389	3.69977	2.93848	2.84578	2.36053
ENSG00000100258	10.4624	10.4689	10.5593	10.5083	10.449	10.3857	10.5496	10.5719	10.4857	10.5625	10.5981	10.4009	10.5281	10.382	10.2849	10.4484	10.4422	10.4894	10.4409	10.2922	11.0007	10.9399	10.9274
ENSG00000100263	8.06249	8.31483	8.2636	8.06964	7.82721	8.19744	8.0355	8.1267	8.24205	8.39131	8.33841	8.16966	8.31352	8.12407	8.01928	8.2975	8.02446	8.40981	8.38137	8.39192	8.49276	8.29251	8.27836
ENSG00000100266	10.7719	10.7135	10.8028	10.7334	10.6953	10.7179	10.6455	10.6927	10.6637	10.6917	10.7641	10.7667	10.79	10.8009	11.0167	10.9625	10.8305	11.1746	11.0075	11.0298	11.7568	11.7488	11.6963
ENSG00000100271	6.89458	7.15738	7.02262	6.95395	7.24542	7.0111	6.84396	7.00726	6.78476	6.90808	7.18499	6.90055	6.94498	6.97288	7.07337	7.21519	7.14648	6.98621	7.07716	7.03439	6.74033	6.5159	6.60729
ENSG00000100280	10.8787	10.9314	10.8894	10.9661	10.8866	10.9618	10.9212	10.9768	10.8965	11.0137	10.9704	10.9297	10.9744	10.9034	10.8707	10.8883	10.789	10.85	10.8467	10.7967	10.7905	10.7475	10.7149
ENSG00000100281	7.93056	7.98302	7.93147	7.86997	7.91392	7.83929	7.75316	7.96557	8.11786	7.88251	7.90414	7.95894	7.80219	7.63277	7.95597	7.89433	7.843	7.85321	7.88336	7.80911	8.06416	8.09849	8.0347
ENSG00000100284	10.4826	10.4628	10.4303	10.5154	10.5655	10.5354	10.6396	10.5231	10.5542	10.5763	10.6191	10.5888	10.5842	10.5202	10.584	10.6423	10.6705	10.7568	10.7024	10.6446	10.9823	11.0027	10.897
ENSG00000100285	3.00157	2.21247	2.83672	3.0416	2.32758	2.67303	3.10297	2.05824	3.96051	1.38374	2.98707	2.68585	2.59694	3.11581	2.71588	3.28375	2.43195	2.92982	3.0854	2.70834	3.68378	3.82288	2.98051
ENSG00000100288	9.44809	9.42195	9.46195	9.34865	9.23291	9.4565	9.38094	9.37717	9.25815	9.45531	9.42932	9.36389	9.2387	9.14018	9.48801	9.42879	9.30009	9.40119	9.48117	9.55529	9.12048	9.10974	9.02528
ENSG00000100290	5.92063	6.17956	5.76924	5.60717	5.62163	5.7177	5.89641	6.00665	5.67093	6.10007	5.98545	5.57705	5.847	5.87074	5.79663	5.51302	5.59274	5.98922	5.85568	5.99407	6.2583	6.15783	6.18356
ENSG00000100292	7.73876	7.54202	7.82939	7.49509	7.71438	7.58831	7.5594	7.57657	7.77135	7.71581	7.73348	7.86117	7.98008	7.94485	8.11514	8.19128	8.4073	8.66379	8.66033	8.74514	9.06745	8.83008	8.7725
ENSG00000100294	7.69062	7.82242	7.60713	7.70971	7.57688	7.42635	7.64787	7.7492	7.54087	7.68229	7.62914	7.68187	7.74221	7.72716	7.72481	7.48913	7.43006	7.94219	7.61789	7.54973	7.65092	7.58559	7.53701
ENSG00000100296	9.37865	9.42871	9.4194	9.44783	9.33348	9.48861	9.57021	9.36473	9.29329	9.44019	9.44467	9.56095	9.4002	9.29882	9.48193	9.57228	9.50457	9.54755	9.60407	9.65872	9.00226	8.97906	8.80399
ENSG00000100297	7.72289	7.79906	7.63288	7.62765	7.61435	7.3332	7.54271	7.51965	7.7153	7.46295	7.47715	7.77788	7.87228	7.54663	7.74742	7.67197	7.46637	7.74359	7.6013	7.60547	7.41459	7.47073	7.57401
ENSG00000100298	4.67415	5.0224	4.77248	5.27117	5.17679	5.7177	4.86782	5.02891	5.18505	4.90545	5.271	5.36513	4.96809	4.74856	4.85048	4.41891	4.7158	4.78034	4.55235	5.09652	2.23369	3.46689	3.1013
ENSG00000100299	9.60542	9.70277	9.60645	9.59003	9.4249	9.61271	9.61679	9.46073	9.54714	9.5711	9.68394	9.60993	9.62536	9.6238	9.4998	9.63176	9.54334	9.55321	9.63971	9.45381	9.50553	9.42295	9.32647
ENSG00000100300	5.6789	5.79495	5.79228	5.87952	5.29228	5.38786	5.78732	5.85713	5.51552	6.06581	5.41182	5.36513	5.62877	5.58408	5.70717	5.51302	5.3422	5.90318	6.11143	5.86299	6.65808	6.44081	6.41093
ENSG00000100304	10.3008	10.0984	10.2673	10.2362	10.255	10.1871	10.2944	10.2102	10.1368	10.3024	10.2821	10.2049	10.2694	10.2314	10.1542	10.3838	10.3698	10.4686	10.3428	10.3946	10.5798	10.4437	10.4599
ENSG00000100307	5.30553	5.4795	5.30812	5.60717	4.8648	4.95954	4.81321	5.46767	4.37648	5.42107	5.23353	4.57442	5.1014	5.26247	5.10516	4.81699	5.52548	5.37352	5.5446	4.79471	5.80244	6.12622	5.56013
ENSG00000100311	7.88137	7.83778	8.00725	7.73931	7.83992	7.66676	7.77476	7.65418	7.8319	7.68229	7.87402	7.97149	7.85978	7.73368	7.47673	7.63721	7.65912	7.53627	7.61238	7.50646	8.46883	8.51628	8.58065
ENSG00000100312	3.66462	4.58615	3.2894	4.40975	4.65063	4.18655	3.64967	3.87912	3.72991	3.17748	3.94223	3.56915	3.75529	4.40124	4.79367	4.12984	3.19802	3.90457	2.95216	2.94624	2.44467	1.73155	2.33908
ENSG00000100316	13.19	13.2159	13.2562	13.1403	13.1961	13.2052	13.217	13.233	13.1303	13.1939	13.1911	13.1577	13.1972	13.2323	13.2516	13.2276	13.2447	13.2534	13.1965	13.144	13.293	13.2189	13.1778
ENSG00000100319	7.51749	7.26357	7.42755	7.51805	7.32894	7.46199	7.66339	7.46901	7.49167	7.31039	7.57775	7.60341	7.56887	7.34023	7.56425	7.66508	7.61127	7.57017	7.5271	7.53545	7.42706	7.44534	7.00579
ENSG00000100320	10.7457	10.8265	10.8398	10.7371	10.8055	10.8201	10.8304	10.7326	10.8321	10.8907	10.8331	10.7926	10.7982	10.7679	10.7293	10.7066	10.6879	10.6545	10.58	10.7703	10.4095	10.3033	10.3027
ENSG00000100321	5.12414	4.58615	5.20891	5.09915	4.17659	5.35032	4.92043	4.07244	4.22417	4.65201	4.84371	4.28374	4.8212	4.79911	4.05274	4.35189	4.52238	4.3827	4.4572	4.13808	3.98308	4.10818	3.41275
ENSG00000100324	8.91019	8.98363	8.95172	8.97868	9.05417	8.94089	9.02376	9.1049	9.04878	9.16076	9.17753	9.04778	9.03947	9.06837	9.07727	9.03708	9.01863	9.08902	9.03658	9.07136	8.5707	8.55833	8.50055
ENSG00000100325	10.007	10.0563	9.97186	9.87426	9.91994	9.9567	9.90488	9.91784	9.9657	10.0121	10.066	9.9951	9.99876	10.0449	10.029	10.13	9.92891	10.0601	10.0145	10.1318	10.6841	10.741	10.6982
ENSG00000100330	10.0553	10.2029	10.1684	10.1116	10.0183	10.0562	10.138	10.0757	10.0289	10.0389	10.1738	10.1549	10.1641	10.2519	10.0167	10.1212	10.1163	10.0828	10.1547	10.1785	10.0711	10.075	10.0625
ENSG00000100335	9.92612	10.0464	10.1529	10.1266	10.3547	10.1697	10.131	10.0925	10.154	10.2576	10.1451	10.1536	10.1216	10.1534	10.1112	10.1312	10.1019	10.1338	10.1651	10.1235	10.0918	10.0212	10.0095
ENSG00000100336	4.29939	4.06612	4.51996	4.59389	5.05124	5.31177	5.02024	4.46588	4.69898	4.74153	4.44532	4.57442	4.8212	4.40124	3.9525	4.2816	4.21606	3.58899	4.06389	3.97836	2.44467	1.73155	2.84868
ENSG00000100342	7.86701	8.05709	8.12533	8.18888	8.32445	8.44013	8.24598	8.08247	8.10701	8.19135	8.27988	7.99011	8.04772	7.75304	7.94296	7.90606	7.843	7.74854	7.69811	7.49175	7.84466	7.95743	7.73203
ENSG00000100344	9.31657	9.45635	9.47739	9.67419	9.77026	9.88466	9.90324	9.66769	9.70661	9.78901	9.77807	9.616	9.56701	9.46664	9.02285	8.99931	9.19947	8.85013	8.88721	8.98995	8.17922	8.01033	7.96883
ENSG00000100345	14.4793	14.37	14.43	14.2531	14.1054	14.1476	14.1077	14.2349	14.2074	14.1587	14.2055	14.2905	14.3342	14.3298	14.2052	14.2207	14.1861	14.3545	14.2251	14.2609	14.6294	14.6717	14.5184
ENSG00000100347	9.29258	9.27356	9.37813	9.33278	9.39075	9.27481	9.55365	9.45851	9.33333	9.37852	9.34272	9.33672	9.31125	9.30747	9.45916	9.29293	9.2908	9.37126	9.30767	9.18317	9.32904	9.3202	9.39007
ENSG00000100348	9.95527	9.99425	9.90211	9.94161	9.87896	10.0058	9.94194	9.98245	9.94453	10.0166	10.0131	9.97654	9.8614	10.0051	10.064	9.93627	10.0142	9.89161	9.76791	9.83957	9.58698	9.59156	9.43245
ENSG00000100350	7.97812	7.88291	7.88937	8.18171	7.87121	8.27463	8.17738	8.18015	7.94588	8.04957	7.95682	8.14217	7.96267	8.02667	7.94296	8.16712	7.9749	8.11673	8.09964	7.98752	7.75352	7.32521	7.27339
ENSG00000100353	10.2505	10.2496	10.2393	10.1021	10.1555	10.1964	10.2098	10.0686	10.1421	10.1308	10.2741	10.1835	10.2575	10.3152	10.3155	10.2772	10.3686	10.5287	10.4401	10.3505	10.6319	10.6667	10.6747
ENSG00000100354	9.57702	9.65804	9.64017	9.80128	9.66705	9.77204	9.61878	9.71004	9.62905	9.6043	9.57395	9.6259	9.6903	9.67715	9.71587	9.61042	9.61384	9.60863	9.60545	9.68806	9.27831	9.45987	9.37221
ENSG00000100359	10.371	10.3773	10.5121	10.5069	10.3232	10.3634	10.4235	10.3991	10.3975	10.4061	10.5639	10.3677	10.4155	10.3919	10.3442	10.4418	10.4235	10.4551	10.4274	10.3706	10.4055	10.3511	10.4031
ENSG00000100360	8.62446	8.74376	8.79235	8.77934	8.72814	8.80178	8.63249	8.89396	8.64968	8.70683	8.73344	8.58752	8.71129	8.64649	8.85234	8.76819	8.55795	8.74518	8.60869	8.57409	8.92082	8.84714	8.92349
ENSG00000100364	10.6377	10.5827	10.5735	10.4837	10.5079	10.3706	10.4502	10.5002	10.577	10.3915	10.4891	10.6329	10.5689	10.6185	10.5766	10.5481	10.6017	10.7629	10.6149	10.6084	11.1164	11.1287	11.0332
ENSG00000100372	7.72289	7.90495	7.95718	7.93964	8.14146	7.98114	7.85804	7.90336	7.99378	8.03194	7.86792	8.08557	7.89081	7.96159	8.00684	7.92923	7.98745	7.93787	7.94165	7.86727	8.03594	8.09032	8.0309
ENSG00000100373	3.00157	4.06612	4.07028	1.96111	3.81391	4.42191	4.19793	3.39154	3.75348	3.61661	3.446	3.56915	4.18349	3.11581	3.13716	4.04751	3.29167	3.18448	3.0854	3.47881	2.79189	1.73155	2.15262
ENSG00000100376	9.17506	9.17419	9.12954	9.25292	9.21894	9.23416	9.21756	9.05998	9.3496	8.95626	9.13245	9.18612	9.15644	8.98349	9.31029	9.2682	9.18587	9.14445	9.44578	9.40948	9.16933	9.08767	9.0713
ENSG00000100379	6.80699	6.87418	6.82459	6.75574	6.6217	6.38916	6.55875	6.77686	6.86422	6.94624	7.01875	6.79154	6.99152	6.96183	6.70875	6.44985	6.73483	7.02747	6.82423	6.39292	7.48785	7.47701	7.46567
ENSG00000100380	11.5752	11.6336	11.5846	11.6312	11.7316	11.6595	11.7193	11.6685	11.6537	11.6584	11.7227	11.6039	11.7268	11.7309	11.6466	11.6286	11.6989	11.6584	11.6068	11.6129	11.8683	11.8633	11.8975
ENSG00000100385	1.73823	4.16687	2.42989	3.95122	3.46585	4.00518	2.9083	1.63684	3.22103	3.61661	3.30863	3.56915	4.10098	3.11581	4.14647	2.77102	3.9343	3.06276	3.0854	3.21777	2.79189	3.56445	2.84868
ENSG00000100387	8.62018	8.54752	8.63243	8.67085	8.69004	8.59261	8.65596	8.51987	8.57685	8.50432	8.70635	8.58344	8.54179	8.66023	8.62292	8.73569	8.45778	8.4709	8.58357	8.59144	8.69966	8.74159	8.66636
ENSG00000100393	11.0649	11.063	11.095	11.062	11.1038	11.1106	11.0552	11.1112	11.1086	11.173	11.0186	11.1384	11.113	11.1027	10.975	11.0423	10.9363	11.0273	11.0463	11.0355	11.0453	11.0847	11.0877
ENSG00000100395	8.73932	8.86868	8.76641	8.76021	8.75188	8.84965	8.78925	8.87463	8.71901	8.92316	8.98242	8.70491	8.86919	8.69735	8.86962	8.8031	8.82595	8.94357	8.74837	8.80886	8.93399	9.02478	8.92962
ENSG00000100399	2.50398	1.77532	2.42989	2.41696	2.59085	2.0795	2.0887	3.23869	2.63293	3.17748	1.98892	2.91102	3.01257	3.52913	1.07996	3.54607	2.10338	1.97903	2.80535	1.50854	2.79189	0.826693	1.90961
ENSG00000100401	10.7199	10.6364	10.6598	10.5197	10.3951	10.3217	10.4024	10.52	10.5321	10.4458	10.5263	10.5178	10.4666	10.607	10.5088	10.5044	10.4926	10.6145	10.6368	10.5904	11.2328	11.1666	11.2061
ENSG00000100403	11.1899	11.0985	11.1929	11.1935	11.0106	11.0261	11.1925	11.1439	11.116	11.036	11.2158	11.1349	11.1242	11.1325	11.0573	11.125	11.0249	11.1293	11.0381	11.0724	11.1125	11.1162	10.9908
ENSG00000100410	7.80053	7.66769	7.65817	7.50661	7.67945	7.70445	7.60833	7.56858	7.57276	7.47605	7.68573	7.67422	7.39798	7.92222	8.05598	7.65121	7.67472	7.75346	7.86957	7.7485	7.89041	8.04032	8.24924
ENSG00000100412	10.7603	10.7341	10.7434	10.7517	10.7578	10.8287	10.8441	10.8861	10.7638	10.8218	10.8189	10.8119	10.7767	10.8331	10.6394	10.7124	10.6489	10.7445	10.7141	10.5808	10.9075	10.8724	10.7949
ENSG00000100413	8.77053	8.61148	8.54699	8.5919	8.72472	8.27463	8.52616	8.80488	8.56104	8.64437	8.61461	8.54197	8.60678	8.74002	8.72899	8.43337	8.58297	8.66901	8.52612	8.53515	8.81566	8.78777	8.84349
ENSG00000100416	9.1125	8.98017	8.96191	8.97454	9.10244	9.07927	8.87839	9.04566	9.00854	9.10282	8.94525	8.99036	9.03392	8.83393	8.97877	9.03975	9.03081	9.11221	9.19611	9.08122	8.84152	8.81033	8.82607
ENSG00000100417	9.82384	9.97354	9.90475	9.91591	10.0014	10.065	10.1477	10.1036	9.94301	9.99859	10.1898	9.95774	10.1097	10.0011	10.1499	10.1035	10.0385	10.0401	10.1679	9.97798	9.61995	9.41644	9.57355
ENSG00000100418	11.0883	11.0449	11.0699	11.1306	11.2347	11.2356	11.2693	11.2401	11.1789	11.2852	11.2473	11.1202	11.211	11.0843	11.2244	11.193	11.2362	11.2238	11.232	11.2686	11.21	11.0717	11.1946
ENSG00000100422	9.92958	9.87087	9.87539	10.0281	9.89427	9.89936	9.94511	9.86985	9.99836	9.95948	9.93214	9.94348	9.86609	9.89033	9.8262	9.86145	9.77634	9.75705	9.7492	9.7512	9.92923	10.0383	9.95744
ENSG00000100425	9.42351	9.30706	9.43595	9.41457	9.18696	9.32889	9.21229	9.39443	9.4038	9.25878	9.35592	9.43973	9.45105	9.32924	9.53055	9.33045	9.36486	9.41081	9.5109	9.57917	9.27831	9.2001	9.19352
ENSG00000100426	9.84415	9.59615	9.91134	9.77769	9.73497	9.71041	9.74814	9.75301	9.7173	9.81229	9.71655	9.84803	9.75412	9.83991	9.7082	9.7471	9.67525	9.69439	9.75921	9.78328	10.0164	9.99851	9.97928
ENSG00000100429	9.4216	9.46486	9.5971	9.51362	9.51609	9.31904	9.43655	9.44114	9.47676	9.45389	9.44163	9.48772	9.51947	9.39948	9.31602	9.55209	9.42347	9.56068	9.63872	9.55997	9.17959	9.02976	9.10014
ENSG00000100433	3.5252	3.84069	3.41343	4.08022	4.17659	4.18655	4.81321	3.87912	4.51424	3.61661	4.37824	3.56915	3.92029	3.26713	4.14647	4.04751	3.82667	3.90457	3.9978	4.28186	1.31112	2.28335	2.54223
ENSG00000100439	10.5505	10.703	10.5601	10.5465	10.6254	10.6403	10.6963	10.5928	10.6253	10.6285	10.7343	10.7256	10.7634	10.6997	10.7713	10.7397	10.7249	10.8251	10.7978	10.7325	10.7582	10.7649	10.7632
ENSG00000100441	10.9664	11.0291	11.0207	11.0354	11.0549	11.0773	11.1234	11.1147	11.0467	11.0568	11.058	10.9789	11.075	11.0351	11.0834	11.0693	11.0736	11.0058	10.96	11.0878	11.0644	11.0738	11.0232
ENSG00000100442	9.84964	9.88017	9.82183	9.79424	10.0211	9.87973	9.8618	9.83194	9.94605	9.72719	9.91744	9.85143	9.89239	9.77983	9.81018	9.77934	9.80321	9.77291	9.80098	9.88813	9.41608	9.3132	9.29199
ENSG00000100445	9.24338	9.32352	9.23206	9.32303	9.37337	9.24698	9.26411	9.29618	9.3747	9.25498	9.37755	9.27233	9.14104	9.1534	9.18611	9.36485	9.28578	9.19058	9.21623	9.27629	9.05545	8.78018	8.99734
ENSG00000100461	9.62049	9.64718	9.54337	9.68944	9.66705	9.73792	9.68871	9.62779	9.55115	9.5772	9.76659	9.54003	9.79242	9.57568	9.59223	9.50832	9.53267	9.59498	9.69289	9.63715	9.25402	9.24494	9.2999
ENSG00000100462	9.20677	9.23347	9.25089	9.16838	9.32446	9.26727	9.26156	9.24443	9.32407	9.20864	9.28445	9.18881	9.18676	9.1655	9.21344	9.15726	9.28324	9.30573	9.33807	9.33105	9.69406	9.70154	9.81457
ENSG00000100473	5.12414	4.06612	4.34409	3.80955	3.1762	3.41682	3.80886	4.07244	3.51168	3.9528	4.23392	4.2009	4.10098	3.94287	3.84477	3.66127	4.21606	4.43269	3.9978	3.89134	4.71055	3.82288	3.95183
ENSG00000100478	6.07859	6.05364	6.67152	6.35793	6.77518	6.80452	6.7742	6.80435	6.41424	6.78715	6.41165	6.56186	6.38922	6.58346	6.54629	6.43374	6.87651	6.58329	6.60871	6.6793	6.66862	6.6553	6.53407
ENSG00000100479	4.7387	4.06612	5.13875	5.1588	4.96103	5.52896	4.81321	5.32309	4.51424	4.22527	4.93989	4.57442	4.65764	4.94093	4.67286	5.28052	4.88633	5.15266	4.95193	4.34872	4.17276	4.55058	5.23002
ENSG00000100483	6.76112	7.18166	7.07051	7.17227	7.0731	7.02308	7.18235	7.21616	6.99943	6.72266	6.92785	6.96473	7.12278	7.22478	7.38356	7.18662	7.04207	7.15952	7.26446	7.13252	7.01275	7.05841	6.68666
ENSG00000100485	9.63752	9.46131	9.4396	9.38053	9.37774	9.52908	9.39072	9.5426	9.57299	9.58326	9.4136	9.45769	9.52806	9.39028	9.3915	9.43331	9.487	9.35031	9.3364	9.56869	9.41451	9.48033	9.53788
ENSG00000100490	4.38253	3.71322	3.82432	3.80955	4.00662	3.55525	3.56627	4.07244	1.02897	3.17748	4.07355	3.69556	3.82069	3.52913	4.14647	4.04751	4.7158	4.10287	3.69828	3.69977	4.28664	3.97257	4.48332
ENSG00000100503	8.89611	8.99737	8.87018	9.0513	8.97859	9.26475	9.2436	9.05141	8.97014	9.02918	9.07535	8.98108	9.02835	8.93346	8.87989	8.76175	8.9401	8.57196	8.66832	8.66215	8.42597	8.71793	8.63419
ENSG00000100504	12.1552	12.3453	12.2297	12.3405	12.4632	12.5511	12.5334	12.38	12.3714	12.4421	12.4758	12.4123	12.3834	12.3822	12.4063	12.3353	12.3118	12.0566	12.1554	12.0921	10.8001	10.6702	10.6501
ENSG00000100505	5.46664	5.5558	5.72205	5.94874	5.67935	5.88457	5.81538	6.07597	5.41355	5.75787	5.41182	5.7326	5.40633	5.77296	5.57856	5.41793	4.98975	4.85558	4.9166	5.1349	4.4422	5.4187	4.52711
ENSG00000100519	10.028	9.96552	9.93181	9.94284	10.0555	10.1465	9.97027	9.89494	10.0422	9.97721	10.0281	9.92529	9.97975	10.1038	10.1533	10.1016	10.1579	10.0907	10.0756	10.1651	10.0634	9.97169	10.0872
ENSG00000100522	10.197	10.1547	10.216	10.1452	10.3357	10.3576	10.3325	10.3143	10.2159	10.3297	10.3515	10.3597	10.2788	10.2778	10.4352	10.3563	10.2641	10.3021	10.3049	10.3268	10.1634	10.1711	10.2325
ENSG00000100523	8.44266	8.26456	8.25118	8.32528	8.05688	8.01153	8.26645	8.08247	8.34259	8.14289	8.35158	8.19128	8.41092	8.21531	8.43603	8.35853	8.31572	8.31302	8.44475	8.56005	8.55374	8.71793	8.67612
ENSG00000100526	5.38834	4.96759	5.37067	5.21608	5.09431	4.42191	5.02024	5.11926	5.22573	5.57513	4.62966	5.11663	5.33593	5.52524	5.43734	4.95886	5.26183	5.15266	5.20717	4.88757	4.62653	4.45204	4.0147
ENSG00000100528	10.1912	10.0028	10.2107	10.2065	10.2177	10.301	10.232	10.2582	10.193	10.1514	10.2637	10.3466	10.1918	10.3021	10.343	10.3413	10.3419	10.3229	10.2177	10.1956	10.4521	10.4517	10.4479
ENSG00000100532	7.36227	7.22903	7.39782	7.39943	7.20668	7.36178	7.29623	7.42541	7.61932	7.20417	7.41157	7.34829	7.52207	7.10934	7.52116	7.47345	7.52781	7.34718	7.42394	7.54261	7.344	7.44534	7.60499
ENSG00000100554	9.14858	9.09968	9.13405	9.01141	9.4249	9.37168	9.12251	9.21656	9.22218	9.11961	9.23317	9.25959	9.16154	9.23829	9.15826	9.03708	9.38872	9.28036	9.09108	9.14138	9.90715	10.0822	10.0143
ENSG00000100557	8.44266	8.4409	8.43437	8.15266	8.26442	8.19215	8.26645	8.22662	8.36097	8.34207	8.3603	8.36779	8.42794	8.21531	8.44528	8.51605	8.56215	8.54664	8.74081	8.76364	8.73018	8.74939	8.63669
ENSG00000100558	5.77436	5.73057	5.57042	5.37541	4.59173	5.18954	5.06766	4.93253	5.14318	5.42107	5.41182	5.67238	5.18388	5.18855	5.6118	5.63079	5.17671	6.05454	5.63433	5.7927	8.61498	8.99227	8.73332
ENSG00000100564	8.80861	8.73148	8.70705	8.64501	8.60695	8.73051	8.713	8.72081	8.909	8.91356	8.67525	8.70866	8.71476	8.86095	8.8867	8.91761	8.85363	8.86154	8.85253	8.9064	9.09897	9.16359	9.21711
ENSG00000100567	9.92785	9.88573	10.0324	10.0141	10.1402	10.0238	10.0928	10.1418	10.1408	10.0322	9.96108	10.1074	9.99734	10.0278	10.251	10.0317	10.1502	10.0208	10.0947	10.0921	10.1569	10.0625	10.2251
ENSG00000100568	10.1214	10.0856	9.99665	10.1116	10.1142	10.167	10.1543	10.2557	10.1786	10.1349	10.1055	10.1536	10.0491	10.2011	10.1242	10.1957	10.2478	10.121	10.0817	10.1413	10.2779	10.2364	10.2692
ENSG00000100575	7.98479	8.0104	8.02194	8.03026	8.2262	8.11589	8.07665	7.98372	7.88367	8.20715	8.13501	7.95894	7.75576	8.21995	8.08586	8.13259	8.11874	8.19486	8.21683	8.28503	8.25463	8.24547	8.37438
ENSG00000100577	7.8525	8.0036	8.02194	7.94812	7.98431	8.01153	7.96836	8.1749	7.98195	7.9777	7.97963	7.8879	8.12805	8.08386	8.02546	8.00753	8.01835	8.21286	7.93725	7.91216	8.0481	8.05298	7.92031
ENSG00000100578	8.29488	7.99678	8.24702	8.38269	8.09343	8.34313	8.23564	8.16433	8.19672	8.04957	8.12992	8.22311	8.19422	8.43501	8.41734	8.26043	8.39793	8.16955	8.28075	8.21974	8.4486	8.58183	8.55666
ENSG00000100580	8.30557	7.98302	8.27181	8.36381	8.28781	8.36211	8.27658	8.27656	8.35181	8.06699	8.17014	8.28977	8.28577	8.25206	8.10933	8.13758	8.39323	8.33619	8.24203	8.32294	8.39139	8.29961	8.27836
ENSG00000100583	2.77413	2.81922	1.86121	3.65243	2.0053	3.79768	3.10297	2.87372	1.62346	2.07686	3.446	3.10575	3.33486	2.53429	2.44783	1.96826	3.82667	3.40087	1.99824	2.22973	4.34038	4.23214	4.07495
ENSG00000100591	10.2928	10.1158	10.1529	10.1525	10.0852	9.983	10.1504	10.1685	10.3334	10.1615	10.1614	10.0888	10.1679	10.207	10.14	10.2784	10.1543	10.426	10.4181	10.1681	10.5075	10.4227	10.501
ENSG00000100592	9.75919	9.79025	9.83714	9.77054	9.75692	9.82604	9.69438	9.82692	9.83538	9.74082	9.82443	9.82746	9.92123	9.86386	9.76841	9.73729	9.86743	9.63823	9.7827	9.78177	9.65218	9.63853	9.77653
ENSG00000100596	9.06923	9.02448	8.98958	9.04341	8.99857	8.77369	8.99031	8.9718	8.96414	8.86459	8.86176	9.09156	8.96561	9.07864	9.11253	8.94629	9.096	8.95645	9.05294	9.00295	9.1969	9.21144	9.19182
ENSG00000100599	8.91718	8.88356	8.85385	8.90657	8.82082	8.90573	8.79631	8.80828	8.86782	8.99318	9.0859	8.78884	8.90611	8.86985	8.75154	8.9406	8.87067	8.79381	8.79289	8.6086	8.74769	8.78271	8.74727
ENSG00000100600	9.69963	9.89677	9.81623	9.86981	9.73497	9.92512	9.87852	9.85019	9.87109	9.88285	10.0255	9.63776	9.78913	9.84594	9.7005	9.6701	9.72106	9.60182	9.66122	9.45571	9.61723	9.72942	9.61726
ENSG00000100601	7.43224	7.2749	7.30478	7.41174	7.16688	7.25409	7.23523	7.23649	7.19652	7.18834	6.99656	7.14172	7.23343	7.39877	7.2099	7.06636	7.31527	7.11428	7.06914	7.2939	7.20607	7.23918	7.26695
ENSG00000100603	9.62263	9.37707	9.60808	9.45082	9.60696	9.59877	9.48762	9.34146	9.4688	9.63674	9.46703	9.71442	9.58609	9.61678	9.73862	9.47918	9.74897	9.59772	9.61925	9.55283	9.56175	9.45829	9.53386
ENSG00000100604	6.39123	6.59565	6.39887	6.54837	6.6069	6.89856	6.20291	6.70574	6.97577	6.53509	6.6996	6.56186	6.4065	6.10977	6.59698	6.76526	6.2429	6.39437	6.4815	6.27755	6.61512	6.21904	6.28906
ENSG00000100605	9.76695	9.869	9.70532	9.68944	10.0308	9.93467	9.95461	9.83528	9.89651	10.0411	9.96108	9.8066	9.88471	9.80633	9.81554	9.8539	9.82436	9.82882	9.76667	9.64881	9.39083	9.37837	9.30462
ENSG00000100612	12.3972	12.4811	12.3909	12.4605	12.6025	12.6403	12.6516	12.5263	12.5142	12.526	12.6396	12.4731	12.5315	12.4832	12.4748	12.4705	12.5126	12.4584	12.3724	12.3552	12.1764	11.987	12.0921
ENSG00000100614	10.0216	10.0514	10.0275	10.203	10.1745	10.1751	10.149	10.0672	10.114	10.1099	10.1299	10.2208	10.0683	10.1738	10.1214	10.1498	10.1418	10.1366	10.0758	10.075	9.97029	10.051	10.0085
ENSG00000100625	5.34753	5.17534	5.37067	5.27117	5.59187	4.68579	5.11358	4.98152	4.57849	5.24858	4.44532	4.70039	5.40633	4.74856	4.67286	5.08803	5.08626	4.7412	4.9166	4.93185	5.00487	4.81129	4.93727
ENSG00000100626	6.92263	6.81332	6.73233	6.90254	7.007	6.91151	7.07039	6.80435	6.56455	6.86888	6.99656	7.26918	6.74214	6.80988	7.03712	6.84053	6.61053	6.72043	6.67364	6.81552	5.1322	4.23214	4.39154
ENSG00000100629	5.17167	4.26104	4.81808	4.67783	4.65063	4.42191	4.28076	4.77469	5.05561	3.61661	3.8931	3.27729	4.5373	3.94287	4.47026	3.96021	4.93897	4.33091	3.69828	3.79873	4.62653	4.29033	4.52711
ENSG00000100632	9.30862	9.37707	9.38761	9.1864	9.09185	9.085	9.16674	9.04277	9.31702	8.99318	9.29585	9.32217	9.39371	9.50512	9.34035	9.25221	9.30596	9.38406	9.26796	9.23492	9.58698	9.48033	9.65598
ENSG00000100644	11.3391	11.1829	11.3496	11.2252	11.2098	11.1964	11.1199	11.1856	11.2391	11.2215	11.1837	11.2838	11.2593	11.3425	11.1669	11.1275	11.2395	11.0943	11.1161	11.1681	11.442	11.4448	11.4036
ENSG00000100647	9.44543	9.45635	9.30994	9.51213	9.47872	9.49292	9.53268	9.37164	9.25695	9.44352	9.43025	9.61194	9.52015	9.50131	9.42929	9.49285	9.44667	9.51891	9.45965	9.48943	9.29031	9.37669	9.25828
ENSG00000100650	11.9379	11.9071	11.9546	11.9245	11.9728	12.0097	12.0497	11.9343	11.906	11.9206	11.9535	12.0143	11.9095	11.8293	12.0671	11.9536	12.0177	11.8938	11.9868	12.0339	11.8315	11.7575	11.8665
ENSG00000100652	6.3086	6.15524	6.04331	5.91454	6.63634	6.85901	6.52517	6.07597	5.96332	6.45796	6.55523	6.28856	6.37173	6.08961	4.90514	5.63079	5.41833	5.06027	5.44892	5.01653	2.44467	1.34893	3.8861
ENSG00000100664	12.3366	12.2448	12.3089	12.3561	12.3538	12.3357	12.3265	12.3236	12.3376	12.3167	12.2599	12.4111	12.3495	12.4672	12.4875	12.3825	12.4618	12.4887	12.4803	12.4551	12.6561	12.6431	12.691
ENSG00000100665	10.7239	10.7279	10.7741	10.7828	10.8518	10.8124	10.8373	10.7888	10.7656	10.8358	10.778	10.7935	10.8677	10.912	10.7443	10.7833	10.7389	10.533	10.486	10.5123	9.58002	9.47877	9.48057
ENSG00000100697	11.171	11.1355	11.1567	11.2699	11.3346	11.3362	11.3081	11.2096	11.231	11.1093	11.1922	11.3229	11.2829	11.3004	11.1973	11.1572	11.2356	11.1919	11.1355	11.2108	11.1581	11.2514	11.1806
ENSG00000100711	8.78206	8.67701	8.90494	8.60804	8.61067	8.64006	8.60864	8.51572	8.64968	8.52338	8.70976	8.40989	8.80549	8.52786	8.62292	8.50453	8.47125	8.48578	8.82421	8.67523	8.40406	8.27099	8.40404
ENSG00000100714	8.86029	8.87985	8.89699	8.97868	9.02385	8.88619	8.96861	8.91933	8.93069	8.97944	8.95391	9.11154	8.91217	8.92495	9.06831	9.12501	9.00943	9.16678	9.17009	8.93387	8.91198	8.95002	8.94987
ENSG00000100722	10.4347	10.3891	10.4367	10.4498	10.5099	10.4713	10.5126	10.4886	10.5472	10.4804	10.5795	10.4499	10.5002	10.4269	10.4977	10.4098	10.5822	10.3646	10.5055	10.4921	9.82588	9.90732	9.90655
ENSG00000100726	9.25446	9.34249	9.33565	9.16838	9.02941	8.94404	8.96861	9.11317	9.19426	9.14854	9.18491	9.25446	9.19424	9.10901	9.11253	9.23371	9.00943	9.3224	9.2662	9.15779	9.30559	9.23015	9.22211
ENSG00000100731	10.5001	10.4603	10.4303	10.5918	10.5986	10.689	10.5506	10.4897	10.5341	10.4525	10.4831	10.561	10.4931	10.5784	10.4696	10.4211	10.5145	10.3662	10.4455	10.5132	10.1064	10.2017	10.1906
ENSG00000100739	2.83444	4.11435	2.91099	4.25765	4.09411	1.65584	2.6832	1.63684	2.85667	3.41368	2.79469	2.2643	2.33342	2.94675	2.44783	4.04242	3.11809	3.14784	2.29753	3.21777	3.72315	3.50474	3.41275
ENSG00000100744	8.89611	9.0042	9.07658	8.86689	8.95541	8.87961	8.83108	8.94734	9.01145	8.93744	8.95103	8.97486	8.87851	9.09896	9.08912	8.88242	9.05187	8.87516	8.6252	9.03121	8.89412	8.98348	9.00704
ENSG00000100749	6.15152	6.00003	6.47201	6.19654	6.38201	6.03413	5.99784	6.22583	6.56455	6.22948	6.0729	6.09569	6.35403	6.29729	6.45764	6.33308	6.40136	6.32987	6.35524	6.37699	6.2158	6.58729	6.77103
ENSG00000100764	9.81423	9.7581	9.8143	9.7925	9.87702	9.75188	9.73934	9.76678	9.82042	9.81306	9.85458	9.81599	9.89804	9.80671	9.89812	9.83709	9.96092	10.0015	9.9401	9.9045	10.1225	10.1518	10.1452
ENSG00000100767	5.80482	6.00003	5.67325	5.76903	5.5615	6.01026	5.8429	5.36061	5.37789	4.34436	6.09395	5.84599	5.94486	6.006	5.43734	5.76564	5.68808	6.44397	6.59759	6.62639	7.36359	7.45173	7.32392
ENSG00000100784	4.11717	3.9578	4.21367	3.65243	4.8648	4.62421	4.01744	3.97901	4.30233	4.34436	4.5708	4.57574	4.18349	4.26402	4.39587	3.76795	4.29895	3.29673	3.20736	3.89134	3.30569	3.89967	3.81722
ENSG00000100796	10.5914	10.5736	10.5593	10.5864	10.5539	10.5797	10.6278	10.6085	10.7236	10.6604	10.5156	10.5221	10.568	10.5519	10.6212	10.4821	10.6489	10.5157	10.5566	10.6371	10.3866	10.426	10.4578
ENSG00000100802	5.86389	6.25015	5.79228	5.91454	6.17689	5.60521	6.02212	5.93383	5.83771	6.2601	6.05153	6.02521	6.10161	6.10977	6.06016	6.02425	5.77752	6.17693	6.09572	6.03525	6.28595	6.00981	5.92994
ENSG00000100804	10.4347	10.4149	10.3941	10.3446	10.2797	10.2973	10.4036	10.3979	10.3147	10.5778	10.4599	10.3939	10.3272	10.4762	10.4571	10.4742	10.4603	10.5473	10.4762	10.4182	10.8239	10.6474	10.7615
ENSG00000100811	10.8434	10.7361	10.8604	10.8634	10.7998	10.7569	10.716	10.8411	10.855	10.8845	10.7418	10.8119	10.8112	10.8712	10.8465	10.8171	10.8305	10.8592	10.7714	10.727	10.7569	10.8515	10.8105
ENSG00000100813	11.7935	11.7352	11.6937	11.6894	11.5897	11.5863	11.6519	11.6245	11.6433	11.6778	11.6726	11.6695	11.7196	11.5815	11.5971	11.6756	11.6632	11.6979	11.813	11.7603	11.6488	11.5909	11.6143
ENSG00000100814	8.66239	8.6468	8.8122	8.50839	8.67238	8.51415	8.72414	8.54045	8.61564	8.55459	8.66473	8.65521	8.60678	8.69401	8.61064	8.74225	8.79058	8.71519	8.73829	8.75442	8.46581	8.39553	8.36234
ENSG00000100815	10.2296	10.1745	10.2021	10.3542	10.3131	10.2368	10.3068	10.2877	10.2185	10.1554	10.1081	10.243	10.2492	10.3303	10.2862	10.2232	10.2447	10.1553	10.1623	10.1968	9.86193	10.1288	10.0829
ENSG00000100823	10.7525	10.7433	10.8196	10.8317	10.8565	10.8002	10.8183	10.8519	10.7912	10.8282	10.8594	10.9324	10.8739	10.8888	10.8996	10.8644	10.9093	10.9995	10.8985	10.8468	10.8692	10.7482	10.7131
ENSG00000100836	11.1967	11.2807	11.2656	11.2336	11.1405	11.1508	11.2016	11.2471	11.2348	11.2633	11.2754	11.211	11.2343	11.1747	11.235	11.2332	11.22	11.211	11.2785	11.3254	10.8717	10.7281	10.7715
ENSG00000100852	11.3036	11.236	11.2455	11.314	11.3233	11.2756	11.2282	11.3083	11.3053	11.1989	11.2068	11.287	11.3061	11.3974	11.2694	11.2389	11.331	11.2939	11.164	11.3581	11.6931	11.8474	11.8277
ENSG00000100865	8.30557	8.13998	8.38219	8.45585	8.30166	8.32872	8.32129	8.39883	8.40149	8.29848	8.39465	8.27971	8.34074	8.40676	8.46815	8.30638	8.29062	8.45284	8.29458	8.36391	8.25463	8.13468	7.83579
ENSG00000100883	9.85874	9.91861	9.84405	9.98962	10.0501	10.0951	9.9981	9.93815	9.94758	9.98261	10.0446	9.95459	10.0574	10.0554	10.0428	9.97158	10.1585	9.98148	9.97315	10.0041	10.6789	10.8496	10.9687
[truncated: 12,350 more rows]
