# Supplementary material for: An updated comparison of microarray and RNA-seq for concentration response transcriptomic study: case studies with two cannabinoids, cannabichromene and cannabinol
Source: BMC Genomics. 2025 Apr 23;26:392. doi: 10.1186/s12864-025-11548-3 (PMC12016467; doi:10.1186/s12864-025-11548-3)
Supplement: Supplementary file 4 — Supplementary Material 4: Table S4. Filtered RNA-seq expression data for CBN-exposed samples (14,869 genes) uploaded for BMC modeling. [file 12864_2025_11548_MOESM4_ESM.xlsx]

## Sheet: CBN_filtered
Table S4. Filtered RNA-seq expression data for CBN-exposed samples (14,869 genes) uploaded for BMC modeling
SampleID	CBN_0uM_1	CBN_0uM_2	CBN_0uM_3	CBN_0.1uM_1	CBN_0.1uM_2	CBN_0.1uM_3	CBN_0.5uM_1	CBN_0.5uM_2	CBN_0.5uM_3	CBN_1uM_1	CBN_1uM_2	CBN_1uM_3	CBN_5uM_1	CBN_5uM_2	CBN_5uM_3	CBN_10uM_1	CBN_10uM_2	CBN_10uM_3	CBN_20uM_1	CBN_20uM_2	CBN_20uM_3
Dose	0	0	0	0.1	0.1	0.1	0.5	0.5	0.5	1	1	1	5	5	5	10	10	10	20	20	20
ENSG00000000419	9.2533	9.2473	9.18842	9.37001	9.39374	9.5092	9.75977	9.63969	9.57662	9.27743	9.28007	9.42427	9.25616	9.24065	9.29457	9.4108	9.33433	9.56479	9.60217	9.58015	9.51965
ENSG00000000457	8.86541	8.69566	8.81863	8.90787	8.99753	8.87642	8.86008	8.78605	8.74341	8.7383	8.8172	8.9697	8.82352	8.71717	8.72702	8.75218	8.68327	8.70513	8.52131	8.60503	8.66371
ENSG00000000460	6.65943	6.60815	6.88245	6.68152	6.68684	6.79095	6.81521	6.76369	6.98266	6.71222	6.87315	7.00473	6.47291	6.88683	6.7468	6.66527	7.05892	6.88794	6.66989	6.75144	6.77209
ENSG00000000971	13.5032	13.5178	13.5625	13.5403	13.6067	13.6483	13.386	13.5526	13.4911	13.3757	13.3978	13.5214	13.258	13.1013	13.2359	13.0112	12.9531	12.983	12.9398	12.8454	12.9087
ENSG00000001036	11.5968	11.6071	11.6503	11.7284	11.7352	11.6811	11.7161	11.7723	11.7684	11.6455	11.7043	11.7455	11.6817	11.757	11.7675	11.855	11.8089	11.8631	11.8474	11.8894	11.8772
ENSG00000001084	10.8377	10.8543	10.9547	10.8753	10.9358	10.9118	11.1273	11.01	10.8704	11.1652	11.127	11.1694	11.7993	11.9385	11.6234	12.1468	12.1832	11.978	12.354	12.2858	12.2902
ENSG00000001167	10.2742	10.2904	10.2416	10.2907	10.2183	10.188	10.29	10.244	10.3082	10.3389	10.2818	10.3843	10.3907	10.4078	10.258	10.4746	10.5318	10.4875	10.8099	10.9234	10.8499
ENSG00000001460	7.10188	7.09487	7.18352	7.10353	6.83233	7.12527	7.37326	7.01362	6.88196	7.21282	7.12394	7.16171	7.00488	7.10561	7.02454	7.03856	7.20186	6.99398	7.138	7.20922	7.23329
ENSG00000001461	8.77354	8.76653	8.87707	8.81196	8.56041	8.90798	8.61477	8.70378	8.65461	8.74727	8.64965	8.71615	8.50922	8.62576	8.51486	7.91683	7.84891	8.05219	8.04677	8.0204	7.86852
ENSG00000001497	9.33662	9.27794	9.08312	9.11392	9.22245	9.26564	9.10347	9.33318	8.88767	9.21847	9.33081	9.17368	9.2212	9.34941	9.31408	9.32219	9.33798	9.25153	9.3831	9.4692	9.28522
ENSG00000001561	9.10058	9.06601	9.48752	9.33482	9.23414	9.28179	9.51441	9.36992	9.36904	9.1726	9.26565	9.39127	8.83987	8.90708	8.90624	9.05443	9.0216	9.01095	9.05585	9.12548	9.0858
ENSG00000001617	4.47691	5.12619	5.26061	4.31715	4.85476	4.8441	4.91713	5.2552	4.97518	4.83372	4.87962	4.23802	4.65014	5.14769	4.78655	4.63236	4.76237	4.31382	4.0159	5.1154	5.23631
ENSG00000001626	2.85904	1.85184	2.57968	2.80304	3.24824	3.51044	3.32032	3.67184	3.84798	3.54245	2.84444	2.99866	2.81297	3.09353	3.51723	3.29504	3.72828	3.9802	4.63518	4.4281	4.17033
ENSG00000001629	10.2901	10.2461	10.4291	10.3426	10.4249	10.4581	10.3383	10.3321	10.3586	10.5251	10.3947	10.4777	10.5957	10.5972	10.3895	10.5748	10.6009	10.6378	10.7959	10.7277	10.6934
ENSG00000001630	13.4014	13.5646	13.722	13.7459	13.6849	13.7144	13.7918	13.694	13.774	13.4612	13.4911	13.5968	13.5288	13.4712	13.4275	13.4666	13.5673	13.4308	13.61	13.525	13.5223
ENSG00000001631	8.95197	9.08468	9.14278	8.84641	8.90654	9.03829	9.05989	8.8749	8.87365	9.18807	8.94735	9.22144	9.2041	9.0695	8.93037	9.03945	9.09331	9.00799	9.1654	8.88802	8.93538
ENSG00000002016	8.2645	8.25892	8.49948	8.33037	8.42931	8.44099	8.55878	8.21707	8.30152	8.4443	8.21795	8.43776	8.4837	8.475	8.35076	8.30245	8.26749	8.10681	7.84389	7.80514	7.85157
ENSG00000002330	9.02637	9.03763	8.64113	9.0421	8.93087	8.73887	8.87627	9.01618	9.0622	8.46873	8.85621	8.72413	8.44294	8.25579	8.76217	8.40731	8.33838	8.65605	7.94255	8.07413	8.18034
ENSG00000002549	9.97205	10.0128	10.0122	9.88067	10.045	10.0812	9.93779	10.1439	9.91738	9.91963	9.97475	9.84936	9.97047	9.99047	10.0514	9.94368	9.9057	9.9723	9.84258	9.78738	9.86803
ENSG00000002586	12.5039	12.531	12.4741	12.5239	12.5203	12.4818	12.4807	12.6397	12.5491	12.2525	12.4215	12.2957	12.2723	12.2475	12.4243	12.3125	12.1633	12.302	11.9957	12.0514	11.9453
ENSG00000002587	2.2489	2.29702	2.85251	2.58077	1.14703	2.76032	2.95264	1.97681	2.21862	1.87298	3.0736	2.68677	0.89611	1.05418	2.52352	1.46627	2.09341	2.35221	2.41586	2.35205	2.45286
ENSG00000002822	8.93171	9.02186	8.62289	8.52675	8.81885	8.55229	8.40818	8.89698	8.61702	8.8732	8.83144	8.71455	8.90211	8.69579	8.96567	8.95522	8.7593	8.94021	8.89047	8.80851	8.84345
ENSG00000002834	14.15	14.1406	14.1944	14.108	14.1167	14.1116	14.1305	14.1724	14.2063	14.2086	14.241	14.1951	14.3183	14.3809	14.3619	14.4316	14.4233	14.33	14.2666	14.2131	14.2356
ENSG00000002919	8.96268	9.02685	9.07648	8.98366	8.90917	8.80742	9.10543	9.10604	9.03565	8.92376	9.00598	8.91734	8.93431	9.08062	9.06307	9.24673	9.08591	9.16749	9.24041	9.37779	9.34004
ENSG00000002933	12.1776	12.3925	12.3313	12.3228	12.3675	12.3266	12.285	12.4768	12.4207	12.0378	12.0623	12.043	11.8436	11.8356	12.121	11.8683	11.7707	11.8567	11.3057	11.3627	11.3468
ENSG00000003056	10.7408	10.6896	10.7583	10.7943	10.7274	10.7557	10.9606	10.8278	10.9029	10.7108	10.7999	10.8625	10.9212	10.7885	10.967	11.0596	11.1113	11.0608	11.5417	11.6162	11.5291
ENSG00000003096	8.98065	9.15455	9.2923	9.3437	9.32437	9.31357	9.22583	9.08279	9.30102	9.21416	9.01635	9.08151	8.82899	8.87104	8.95676	8.46603	8.60371	8.64425	7.28564	7.16037	7.41071
ENSG00000003137	7.8214	7.42567	7.18352	7.19467	6.80124	6.83541	7.3403	7.31791	7.18944	8.0381	7.75584	7.70354	7.99439	7.9133	7.94861	8.19805	8.25982	8.34234	8.75284	8.67336	8.85988
ENSG00000003147	9.57298	9.51509	9.64606	9.63522	9.61545	9.68347	9.48304	9.62008	9.58808	9.49536	9.46559	9.53267	9.54431	9.47694	9.45938	9.72218	9.63632	9.6776	9.89937	9.93868	9.97583
ENSG00000003249	10.3044	10.1232	10.0668	9.96364	10.0648	10.072	10.1294	10.3144	10.1533	10.2523	10.3572	10.2211	10.7143	10.7814	10.7746	11.2439	11.1492	11.0602	11.3411	11.3528	11.2881
ENSG00000003393	10.4701	10.5358	10.6773	10.5686	10.561	10.6352	10.5097	10.3763	10.3956	10.6185	10.5692	10.6459	10.5045	10.6309	10.4397	10.4394	10.4791	10.4883	10.5087	10.4632	10.4676
ENSG00000003400	8.74858	9.01234	8.91476	8.90187	8.99065	8.81854	8.88544	8.65557	8.85388	8.85352	8.84462	8.79145	8.81251	8.73186	8.66084	8.34218	8.60975	8.5367	8.54243	8.35304	8.39116
ENSG00000003402	10.214	10.1964	10.1665	10.0048	10.1157	10.1155	10.0335	10.0088	10.0319	10.2657	10.1151	10.2351	10.2901	10.3936	10.0878	10.1043	10.0358	10.0966	10.2465	10.2803	10.2298
ENSG00000003436	10.6482	10.6445	10.8222	10.8936	10.7891	10.7432	11.0464	10.8524	11.0552	10.8752	10.7333	11.0268	10.8177	10.8596	10.9033	11.4475	11.5518	11.4272	12.5571	12.6446	12.4723
ENSG00000003509	8.96629	9.12114	8.96233	9.10872	9.16561	9.25477	9.02474	9.20027	9.0523	8.99073	8.97086	9.08976	9.02533	9.07775	9.01885	9.08753	9.06406	9.01554	8.93961	8.83772	9.05942
ENSG00000003756	11.4702	11.541	11.398	11.4353	11.4538	11.4549	11.4512	11.4038	11.2988	11.5564	11.46	11.3666	11.4054	11.405	11.3217	11.2959	11.3438	11.2123	11.1666	11.0909	11.1399
ENSG00000003987	6.27268	6.18516	6.6872	6.54961	6.25368	6.50934	6.40762	5.96948	6.34694	6.32191	6.18416	6.16396	5.83207	6.03546	5.62785	6.24661	6.1214	5.76498	5.94742	6.11168	5.79689
ENSG00000003989	11.6136	11.81	11.8758	11.9459	11.7586	11.8888	11.971	11.705	11.9021	11.7346	11.7213	11.8277	11.5855	11.645	11.4973	11.3932	11.5632	11.4024	11.4701	11.3254	11.398
ENSG00000004059	11.2239	11.2845	11.077	11.2334	11.2111	11.2247	11.1451	11.2949	11.2718	11.0029	11.1198	11.0795	10.987	10.9089	11.2091	11.0286	10.9667	11.0679	10.9342	10.9639	10.8596
ENSG00000004139	9.79808	9.71982	9.71926	9.62433	9.56813	9.64652	9.60784	9.49651	9.54167	9.7316	9.71306	9.64359	9.36754	9.35288	9.36616	9.15155	9.23439	9.17925	8.76007	8.58564	8.76034
ENSG00000004142	12.0578	12.2675	12.1966	12.1906	12.2222	12.2213	12.128	12.2593	12.2407	12.0207	12.1127	12.0323	11.926	11.8922	12.0928	11.9647	11.886	11.9153	11.6542	11.6512	11.607
ENSG00000004399	9.60114	9.20007	9.25458	8.97512	9.24573	9.00848	9.13264	9.09833	9.00861	9.53388	9.46307	9.46767	9.32363	9.28614	9.37727	9.58319	9.58354	9.44242	10.8562	10.941	10.7112
ENSG00000004455	11.0523	11.098	11.1832	11.2002	11.2394	11.2019	11.1389	11.2391	11.1327	10.9647	11.042	11.0388	11.0123	10.9781	11.0257	10.8876	10.9464	10.9257	10.7492	10.747	10.7437
ENSG00000004468	5.12014	5.01415	5.86413	5.31702	5.52166	5.37254	5.26505	5.2917	5.27661	4.92085	5.05084	5.34429	4.54764	4.18782	4.45281	3.63923	3.31987	3.9802	3.10244	2.75439	3.17872
ENSG00000004478	10.5493	10.5231	10.5027	10.4462	10.5388	10.3627	10.453	10.652	10.5073	10.6923	10.7593	10.5764	11.1451	11.1521	11.1518	11.7228	11.7108	11.589	12.293	12.4015	12.2199
ENSG00000004487	11.0754	10.9392	11.13	11.0373	11.1522	11.1512	11.0122	11.1545	11.1316	11.1977	11.1664	11.1433	11.346	11.3255	11.2999	11.4652	11.3463	11.4485	11.3984	11.3369	11.3228
ENSG00000004534	10.9605	11.0392	10.8865	10.8152	11.0304	11.0695	10.8052	10.8437	10.7395	11.1411	10.9403	10.9874	11.1079	11.0879	11.0053	11.0697	11.0056	11.0152	11.1475	11.2298	11.2451
ENSG00000004660	3.28651	2.63673	3.60888	2.9956	4.26444	3.64972	3.20786	4.14066	2.55401	3.8394	3.2713	2.85113	3.38839	4.18782	3.73872	4.28631	4.24577	3.73533	4.63518	4.67992	4.70377
ENSG00000004700	9.2533	9.17097	9.51967	9.49083	9.18682	9.48149	9.50551	9.27738	9.47902	9.34003	9.24816	9.43079	9.34861	9.36834	9.30544	9.33996	9.45006	9.34922	9.53207	9.59554	9.46771
ENSG00000004766	9.15857	8.9528	9.27501	9.20686	9.28558	9.35487	9.37488	9.20266	9.32314	9.28361	9.41945	9.30884	9.23776	9.3254	9.1282	9.22565	9.28795	9.15091	9.33305	9.39373	9.43637
ENSG00000004777	6.01802	5.90005	5.9245	5.42135	5.52166	5.48844	5.47399	5.2917	4.97518	5.6127	5.29756	5.25904	5.34369	5.1032	5.2133	4.77853	4.6728	4.63315	5.86931	5.92932	5.27016
ENSG00000004779	9.91524	10.0255	10.1145	10.398	10.1795	10.2753	10.3956	10.3473	10.256	9.75599	9.91687	10.0656	9.78438	9.62197	9.89181	9.76666	9.65982	9.99685	9.49354	9.54093	9.52492
ENSG00000004799	5.96121	6.30904	6.44081	6.42129	6.34274	6.79095	6.72615	5.64203	6.2112	6.13412	5.94453	5.9985	6.09088	5.96262	5.78524	5.14486	5.57176	4.93375	4.69679	4.72541	4.65335
ENSG00000004838	4.30495	4.45134	2.57968	2.9956	4.66058	3.51044	3.42464	3.97095	4.17427	3.42813	3.44514	4.04781	2.81297	3.79894	3.10429	2.17828	3.43332	2.92024	2.68268	0.864807	1.88167
ENSG00000004848	3.28651	3.34108	2.57968	2.3179	1.14703	2.49067	2.45797	2.97291	2.55401	2.85068	3.0736	2.50124	2.15191	1.05418	2.93542	2.84213	2.56104	2.92024	1.66366	0.864807	1.88167
ENSG00000004864	11.2072	11.3502	11.4115	11.4301	11.3947	11.3627	11.4209	11.4279	11.4413	11.2327	11.2668	11.4071	11.3678	11.29	11.371	11.4296	11.4888	11.3228	11.7117	11.7519	11.6749
ENSG00000004866	9.56814	9.56813	9.82497	9.73583	9.67668	9.6486	9.59906	9.79227	9.69847	9.55786	9.70806	9.62687	9.60299	9.57997	9.55312	9.66849	9.70288	9.60643	9.64772	9.66772	9.68118
ENSG00000004897	10.8078	10.8693	10.9691	10.9808	11.0176	10.9736	11.1584	10.8968	10.9121	10.9386	10.8957	11.0375	10.8724	10.8554	10.8101	10.7107	10.7918	10.7576	10.7357	10.7738	10.7913
ENSG00000004961	9.08071	9.11096	9.30371	9.2873	9.08724	9.21045	9.33695	9.37205	9.23547	9.22276	9.26565	9.28568	9.41744	9.31081	9.38549	9.50833	9.48501	9.46607	9.61019	9.64668	9.61659
ENSG00000004975	10.3632	10.5484	10.3624	10.4086	10.4262	10.3915	10.3787	10.4016	10.3151	10.2814	10.32	10.206	10.4264	10.3986	10.4239	10.6118	10.523	10.4422	10.6449	10.8171	10.6729
ENSG00000005001	5.77599	5.96176	5.39468	5.87769	5.31711	5.72735	5.79914	6.36168	5.83379	6.02035	5.69194	5.963	5.95731	5.85939	6.36977	6.97932	6.8086	6.50004	8.05268	8.07413	7.7714
ENSG00000005007	11.9826	12.041	11.8763	11.6563	11.9381	11.8799	11.6787	11.8676	11.6967	11.973	11.9935	11.8687	11.9629	12.02	11.9497	11.9237	11.835	11.8631	12.0416	12.0252	11.9964
ENSG00000005020	8.70167	8.72264	9.07315	8.71608	8.71851	8.64624	8.67417	8.69017	8.52226	8.79706	8.77303	8.80655	8.86939	8.81007	8.63349	9.03031	9.02387	8.91358	9.1275	9.16934	9.11636
ENSG00000005022	12.1587	12.1883	12.1997	12.3025	12.2762	12.2904	12.1808	12.3808	12.3362	12.0077	12.0965	12.1527	12.0398	11.9733	12.1869	12.1113	12.0762	12.2587	12.2076	12.2855	12.2665
ENSG00000005059	4.30495	4.05811	3.74901	3.69579	3.84402	4.59107	4.45773	3.43127	3.84798	3.92619	4.81772	3.66156	3.88525	4.18782	3.73872	4.41111	4.6728	4.4823	3.10244	4.05318	4.30707
ENSG00000005075	9.91743	9.87305	9.88202	9.86683	9.87656	9.85641	9.83462	10.0372	10.0163	9.56552	9.60048	9.68699	9.65248	9.62431	9.85413	9.77131	9.70678	9.92202	9.57884	9.58928	9.4385
ENSG00000005100	9.0229	9.01598	9.05639	8.96652	9.01457	8.97906	9.03713	8.74055	8.97058	9.2733	9.1667	9.05647	9.29227	9.21213	9.1159	9.32615	9.48994	9.24569	9.59814	9.58324	9.62152
ENSG00000005108	5.67363	5.83559	5.73524	5.35264	5.12962	4.78488	5.65646	5.52425	5.44744	5.87518	5.82375	6.10003	6.2945	6.21345	6.19372	6.60121	6.91985	6.60113	7.78837	7.90652	7.6545
ENSG00000005156	9.54426	9.45199	9.60515	9.63702	9.62879	9.58493	9.5595	9.68842	9.63966	9.669	9.54654	9.54623	9.66398	9.78752	9.61079	9.64644	9.77729	9.66598	9.67859	9.81788	9.79724
ENSG00000005175	9.40211	9.29902	9.37575	9.3326	9.28277	9.28447	9.25972	9.44071	9.1359	9.50421	9.46054	9.50517	9.50553	9.7006	9.46133	9.67317	9.64076	9.65279	9.85107	9.98967	9.86803
ENSG00000005187	9.63785	9.37753	9.35396	9.48482	9.49191	9.51377	9.16124	9.42231	9.38227	9.25456	9.19132	9.44372	9.04663	8.74277	8.91762	8.52936	8.5066	8.60219	7.36369	7.19312	7.12645
ENSG00000005189	7.17864	7.33531	7.36873	7.11394	7.31193	7.01363	7.13265	7.4449	7.47276	6.93787	6.87315	7.23795	6.74023	6.9759	6.99261	6.3121	6.42553	6.61329	5.81478	5.74282	5.79689
ENSG00000005194	10.0284	10.0073	10.0999	10.0624	10.025	10.0135	10.1438	10.0918	10.1315	9.98174	10.0184	10.0604	9.94801	10.0057	10.1632	10.1025	10.1093	10.2019	10.1471	10.1274	10.2086
ENSG00000005206	11.1142	11.3364	11.1155	11.1326	11.0861	11.0241	11.1948	11.1576	11.1726	11.0382	11.146	10.9692	10.9435	11.1239	11.0201	10.9063	10.8945	10.7713	10.4064	10.4361	10.3607
ENSG00000005238	9.01246	8.87876	8.85398	9.02288	8.91644	9.04994	8.94146	9.06445	8.94941	9.03291	8.96015	8.84606	8.88786	8.97347	8.99218	9.2778	9.13704	8.98078	9.84088	10.0001	9.73041
ENSG00000005243	6.46882	7.21377	6.94207	7.05029	7.17313	7.1012	6.84372	7.34422	7.06372	6.41489	7.01782	7.01344	6.89436	6.61307	6.90383	6.12433	6.21956	6.37715	6.20231	6.02338	5.74967
ENSG00000005249	4.47691	5.07125	5.47761	5.35264	5.02587	4.44571	4.55288	5.17929	4.66467	4.53547	4.87962	5.13693	4.69878	4.91009	4.38883	4.46968	4.92638	4.25298	4.28019	4.5844	4.30707
ENSG00000005302	9.2533	8.99768	9.12873	9.12168	9.02133	8.92865	9.12879	9.13647	9.28702	9.0715	9.00944	9.08358	9.02055	9.04871	9.03461	9.04242	9.10957	9.02694	9.17428	9.15694	9.17785
ENSG00000005339	11.214	11.156	11.0745	10.8638	11.0352	11.0447	10.8104	10.9268	10.8993	11.3677	11.2537	11.1887	11.2625	11.2763	11.0965	11.1435	11.1156	11.129	11.3161	11.226	11.3107
ENSG00000005379	6.8592	7.16213	6.85169	6.63887	6.76947	6.87854	6.6952	6.76369	6.78966	7.0191	6.79499	6.61647	6.84119	6.80586	6.99261	6.24661	6.72194	6.68413	5.50614	4.85386	5.30324
ENSG00000005421	7.55964	7.79124	7.93619	8.08774	8.13734	7.92819	7.97693	7.98592	8.12907	7.56359	7.52352	7.39936	7.22843	7.20369	7.34425	7.01908	7.15301	7.03972	6.45496	5.92932	6.3176
ENSG00000005436	9.74059	9.65709	9.72879	9.78939	9.83086	9.77	9.81959	9.78921	9.69584	9.77073	9.80168	9.89245	9.91622	9.7265	9.74142	9.89241	9.7973	9.87345	9.76741	9.54569	9.63295
ENSG00000005448	4.47691	4.68881	4.20345	4.75004	4.72826	4.65861	4.68478	4.77747	4.26847	5.22468	4.87962	5.16844	4.5998	4.49383	5.09798	4.41111	4.18227	4.93375	3.10244	3.54526	4.17033
ENSG00000005469	10.2342	10.0629	10.3026	10.4181	10.2886	10.3006	10.3173	10.2682	10.2859	10.1802	10.1685	10.3191	10.122	9.87282	9.99748	9.75934	9.6901	9.84023	8.94914	8.73025	9.05457
ENSG00000005471	8.1861	8.39828	8.39562	8.21342	8.16202	8.31583	8.24593	8.32224	8.19503	8.356	8.27665	8.26583	8.15889	8.0308	8.23425	8.14364	7.91388	8.06552	8.02706	8.40187	8.2099
ENSG00000005483	10.2267	10.2768	10.1608	10.0435	10.2154	10.2106	9.94549	10.0525	10.0608	10.315	10.2558	10.2782	10.1197	10.0921	10.0161	9.90042	9.88342	9.83635	9.74935	9.49406	9.6133
ENSG00000005486	10.7376	10.777	10.836	10.7959	10.8117	10.5905	10.8618	10.9355	10.9789	10.5922	10.7736	10.6452	10.6251	10.6686	10.8816	10.887	10.8682	10.879	11.0464	11.1054	10.9427
ENSG00000005700	11.3667	11.3262	11.5261	11.6211	11.4534	11.5671	11.6102	11.4392	11.6228	11.6306	11.5688	11.7501	11.7377	11.7091	11.5739	11.8765	11.9824	11.8123	12.2807	12.2427	12.2028
ENSG00000005801	9.91711	9.74965	9.7787	9.83102	9.83279	9.85882	9.964	9.89235	9.70007	10.1422	9.93156	9.96602	10.4856	10.3871	10.2468	10.7123	10.7452	10.4933	11.0143	10.9666	10.9583
ENSG00000005810	9.87159	9.89907	9.88696	9.80233	9.86884	9.87843	9.78203	9.58558	9.74582	9.98679	10.0098	9.96938	9.92647	10.1629	9.86561	9.88974	9.97174	10.0049	10.0879	10.0105	10.1116
ENSG00000005812	9.57061	9.65709	9.75396	9.80394	9.54214	9.79835	9.83742	9.63614	9.79215	9.76632	9.78963	9.79235	9.63146	9.57183	9.54627	9.5205	9.71695	9.70198	9.86791	9.79806	9.65393
ENSG00000005844	8.42013	8.72264	8.55305	8.48683	8.72267	8.76592	8.53544	8.47687	8.62376	8.48669	8.18155	8.17229	7.92963	7.71321	7.83915	7.24548	6.9771	6.91764	5.24258	4.31362	4.75249
ENSG00000005882	8.89605	9.06249	9.10936	9.01734	8.87599	8.92179	8.89	9.02975	8.79179	8.76209	8.96373	8.71081	8.5058	8.28098	8.57719	7.93253	7.9572	7.89682	6.97351	6.51287	7.00102
ENSG00000005884	8.04971	7.9595	8.03534	7.79589	7.80263	7.67452	7.55664	7.81462	7.46283	8.18613	8.18768	7.95461	7.82943	7.72059	7.79046	7.94291	7.67529	7.8359	9.08494	9.37244	9.07147
ENSG00000005889	10.5649	10.5472	10.7614	10.7747	10.6531	10.6997	10.805	10.4669	10.6886	10.7388	10.6063	10.6599	10.5492	10.5482	10.4642	10.3467	10.4549	10.4069	10.3949	10.336	10.4166
ENSG00000005893	12.2334	12.1802	12.365	12.3594	12.2389	12.3259	12.3679	12.395	12.3784	12.2451	12.2618	12.4161	12.2102	12.2469	12.2437	12.3328	12.4189	12.3973	12.6354	12.5592	12.5607
ENSG00000005961	2.85904	3.8123	3.08186	2.80304	1.77785	2.76032	2.95264	1.56437	2.55401	2.85068	3.2713	2.28829	2.15191	2.67417	3.51723	2.65288	3.97306	2.92024	3.10244	3.73514	2.6713
ENSG00000006007	10.9677	11.0139	11.1396	11.0489	11.0633	11.0565	11.0091	11.106	11.0935	10.8428	10.9207	10.9353	10.8456	10.7963	10.9974	10.907	10.8498	10.9363	11.0735	10.9907	10.986
ENSG00000006015	9.73212	9.76271	9.60745	9.606	9.72717	9.56307	9.71031	9.7908	9.83126	9.42631	9.71094	9.53871	9.6299	9.71546	9.85972	9.72969	9.50299	9.60033	9.07046	9.29723	9.23896
ENSG00000006025	7.66122	7.86577	7.51332	7.72291	7.84897	7.73834	7.68822	7.78931	7.75899	7.99357	8.05311	7.39271	7.68599	7.82702	7.77803	7.51252	7.45791	7.41778	7.24498	7.42448	7.22468
ENSG00000006042	10.2282	10.1164	10.3624	10.2827	10.2344	10.1951	10.1778	10.2819	10.3759	10.0737	10.1068	10.1705	10.1528	10.2227	10.2389	10.3031	10.2601	10.2935	10.1526	10.04	10.0299
ENSG00000006047	5.52477	6.30904	6.28836	6.06113	6.27647	5.98584	5.85622	5.75092	5.89414	5.95991	6.41072	6.11628	5.67074	5.98731	5.80988	5.67941	6.01608	5.50289	3.56572	5.14918	5.05399
ENSG00000006062	7.74774	7.59101	7.78158	7.51856	8.04747	7.76923	7.56237	7.91164	7.65819	7.98853	7.85162	7.7089	7.84031	8.2507	7.95415	8.19372	8.24047	8.17615	8.70866	8.76878	8.70451
ENSG00000006116	3.28651	3.34108	3.08186	3.58035	3.42178	2.15875	3.42464	3.29405	3.58056	2.85068	4.19458	2.85113	2.81297	2.08053	3.73872	0.911912	2.34609	3.06883	1.66366	1.79214	2.19535
ENSG00000006118	9.86193	9.70524	9.44693	9.46054	9.50162	9.42443	9.32521	9.56895	9.55809	9.81689	9.81955	9.73957	9.89941	9.92647	10.0553	10.19	10.142	10.1517	10.5458	10.7388	10.568
ENSG00000006125	11.9551	12.0401	12.1448	12.0668	11.9821	12.0468	12.0345	11.947	12.104	12.0454	12.0813	12.1263	12.0091	12.0452	12.0064	12.1256	12.1636	12.0389	12.4743	12.4805	12.3545
ENSG00000006194	9.65363	9.75183	9.51232	9.64782	9.80367	9.69156	9.49657	9.57821	9.49859	9.85195	9.82743	9.67522	9.84642	9.81192	9.73178	9.86676	9.91306	9.7687	10.1429	10.1986	10.0951
ENSG00000006210	10.1398	10.0018	9.82695	9.84828	9.95962	9.87666	9.78326	9.78281	9.88615	9.66585	9.76934	9.80368	9.12659	9.13688	9.52224	8.35389	8.53229	8.688	7.03443	6.9076	7.42581
ENSG00000006282	10.7875	10.6782	10.5478	10.5126	10.6389	10.5499	10.4775	10.4728	10.5193	10.6783	10.7417	10.5073	10.6859	10.6913	10.6733	10.6223	10.5341	10.5306	10.1093	10.1865	10.1045
ENSG00000006327	12.1799	11.8811	11.8643	11.9812	11.9669	11.749	12.0142	12.1216	12.1554	12.039	12.245	12.0559	12.4971	12.5224	12.6577	13.015	12.9705	13.0017	13.415	13.6678	13.4096
ENSG00000006432	9.34497	9.22859	9.42881	9.49681	9.23414	9.26293	9.41184	9.31998	9.44665	9.56633	9.5513	9.55519	9.64394	9.76092	9.30544	9.77103	9.87716	9.71332	10.3937	10.3767	10.3617
ENSG00000006451	10.2698	10.2004	10.2356	10.3948	10.2774	10.3803	10.3827	10.3826	10.3785	10.319	10.1962	10.4297	10.387	10.3566	10.4138	10.5393	10.6198	10.5096	10.7755	10.9093	10.7484
ENSG00000006453	11.5555	11.3808	11.4135	11.2953	11.3451	11.3872	11.2276	11.3304	11.2796	11.489	11.4386	11.4924	11.5358	11.4776	11.5189	11.7621	11.7787	11.7003	12.1561	12.0787	12.1219
ENSG00000006459	8.64869	8.94136	8.71134	8.85916	8.68058	8.90451	8.91036	8.72061	8.64147	8.8618	8.68041	8.75559	8.74752	8.92316	8.61613	8.82409	8.85344	8.67936	9.5065	9.46418	9.29964
ENSG00000006468	4.89601	3.67166	4.46967	4.31715	3.57667	4.19585	4.35585	4.67064	4.97518	4.58966	5.05084	5.13693	5.28117	5.35163	5.35398	5.21502	5.49544	5.04559	4.86723	5.21444	4.5469
ENSG00000006530	9.57298	9.45735	9.46483	9.59116	9.51605	9.65894	9.52911	9.59474	9.61746	9.45396	9.60268	9.625	9.51235	9.522	9.61953	9.48011	9.63039	9.42357	9.49354	9.57394	9.48223
ENSG00000006534	7.80536	7.92118	7.68891	7.89585	7.63645	7.70679	7.46786	7.72403	7.33805	7.48714	7.86698	7.54452	7.05245	6.92568	7.41019	7.00924	6.58134	7.0487	5.81478	5.6515	5.90858
ENSG00000006555	4.30495	4.68881	4.94805	5.24303	4.26444	5.0593	4.88092	4.96997	4.51897	4.83372	4.46072	4.29623	4.3178	4.18782	4.78655	4.07619	4.52707	4.4283	4.91985	4.5844	4.30707
ENSG00000006576	8.23485	8.01149	8.20921	8.17489	7.80263	8.19593	8.1694	7.83949	8.26668	8.10474	8.20591	8.26631	7.94987	7.95771	8.13078	8.14961	8.37079	8.26742	9.06171	9.029	9.01518
ENSG00000006607	9.11692	9.32273	9.37033	9.1674	9.12539	9.22723	9.34362	9.1638	9.2842	9.26708	9.27144	9.18142	9.54929	9.6259	9.30977	9.69635	9.83521	9.52836	9.76021	9.76577	9.75153
ENSG00000006611	7.74774	7.76552	7.65368	7.69543	7.54559	7.51967	7.55089	7.85787	7.71784	7.69299	7.41273	7.67091	7.49951	7.48083	7.92625	7.48438	7.54252	7.67709	6.87034	6.74041	7.18973
ENSG00000006625	8.83412	8.74229	8.90928	8.95449	8.9604	9.01464	9.02681	9.11371	8.99762	8.90237	8.7607	8.83078	8.85851	8.65688	8.8478	8.77556	8.6493	8.83274	8.46713	8.25318	8.54618
ENSG00000006634	7.55677	7.50782	7.57846	7.88142	7.8904	7.93862	7.65182	8.01629	7.69105	8.1052	7.83453	7.93697	8.03522	7.84962	7.73119	8.03723	7.9803	8.03883	8.20084	8.31274	8.21951
ENSG00000006652	10.4353	10.3098	10.3432	10.3646	10.2984	10.4197	10.4835	10.31	10.3465	10.4765	10.3921	10.4659	10.7665	10.7823	10.6649	11.1586	11.1962	10.9804	11.6366	11.5926	11.4897
ENSG00000006695	9.16792	9.24751	9.17798	9.3518	9.15701	9.01122	9.17798	9.19935	9.22986	9.0167	8.96223	9.11465	9.19986	9.20528	9.16849	9.32006	9.41485	9.32177	9.5216	9.41422	9.29814
ENSG00000006704	8.72318	8.59215	8.45924	8.37436	8.32388	8.28944	8.2497	8.34413	8.30608	8.708	8.47015	8.6646	8.89832	8.97655	8.76532	9.19993	9.14331	9.07606	9.67093	9.75895	9.72279
ENSG00000006712	10.0727	9.93413	9.77666	9.86688	10.05	9.90995	9.76101	10.0867	9.98657	9.88212	10.0321	9.99597	10.1063	10.0605	10.201	10.3699	10.0759	10.1765	10.3356	10.5312	10.4118
ENSG00000006715	10.5589	10.5244	10.5774	10.663	10.4514	10.6508	10.6728	10.5043	10.5241	10.5518	10.6086	10.6688	10.5442	10.5891	10.4456	10.5047	10.6145	10.5623	10.7163	10.7471	10.657
ENSG00000006740	7.65228	7.52099	7.53285	7.26179	7.56422	7.36653	7.23663	7.64157	7.02376	7.36039	7.5712	7.57423	7.59255	7.35366	7.68119	7.68929	7.61043	7.67709	7.85068	7.92614	7.52027
ENSG00000006744	10.8795	10.9032	10.8575	10.791	10.8968	10.8318	10.721	11.0127	10.8022	10.84	10.9454	10.8798	11.0143	10.9698	10.9111	10.9993	10.916	10.9357	10.9246	10.8975	10.8527
ENSG00000006747	3.08855	2.29702	1.80282	3.16545	3.84402	2.15875	1.99866	2.55917	3.25204	2.18603	3.44514	3.36785	2.97972	2.89903	2.52352	2.43501	2.56104	1.40186	2.08824	1.40173	1.48027
ENSG00000006756	11.1052	11.1797	11.2402	11.0831	11.1203	11.1186	11.1389	11.1238	11.0311	11.23	11.1656	11.1713	11.184	11.235	11.1715	11.1378	11.1931	11.098	11.12	11.1711	11.0886
ENSG00000006757	9.74059	9.77994	9.69237	9.84046	9.74974	9.80208	9.89303	9.81921	9.83319	9.44297	9.55368	9.4881	9.51575	9.50072	9.65055	9.62083	9.61994	9.638	9.08205	9.01074	8.99001
ENSG00000006831	10.8679	10.8286	10.9763	10.9108	10.8107	10.9307	10.9767	10.9348	10.9579	10.8718	10.9003	11.0089	10.9907	10.9217	10.8896	11.0879	11.0828	10.9804	11.5774	11.5945	11.5555
ENSG00000006837	3.88623	4.45306	3.70426	5.19987	4.63401	5.13949	5.51568	5.4163	4.83997	5.13497	4.57963	4.84797	4.86103	4.51844	4.30117	4.97612	4.41276	4.57866	5.07359	4.6571	4.38268
ENSG00000007001	4.55577	5.01415	5.26061	5.12439	4.97106	5.37254	4.80563	4.82805	5.02999	4.15906	4.68532	4.77697	2.81297	3.55648	2.74412	1.46627	2.56104	3.20354	1.66366	2.09909	0.922201
ENSG00000007047	9.69559	9.78635	9.49002	9.35472	9.75177	9.49079	9.35357	9.66252	9.48148	9.72757	9.76934	9.56559	9.83286	9.78047	9.8102	9.88167	9.88716	9.8785	10.221	10.3148	10.1777
ENSG00000007062	10.3522	9.55317	9.89453	9.92719	9.7879	9.72345	9.88734	10.0011	9.91374	10.1846	10.0028	10.3015	10.0464	10.0459	10.1208	10.1987	10.2427	10.3326	10.4007	10.28	10.5569
ENSG00000007080	10.1589	9.94372	9.85047	9.84828	9.93835	9.64444	9.89984	10.0405	9.9883	9.64841	10.0063	9.58615	9.77874	9.94077	10.1208	10.2445	10.0031	10.1507	10.0574	10.297	10.0459
ENSG00000007168	11.4948	11.5505	11.5711	11.5309	11.5348	11.5048	11.5063	11.5053	11.5355	11.5866	11.5364	11.6437	11.6588	11.5916	11.5646	11.7175	11.7273	11.686	11.9548	11.9312	11.8854
ENSG00000007171	3.88379	3.34108	2.24292	1.99623	3.05093	2.15875	2.80582	3.43127	2.21862	2.85068	2.84444	2.99866	2.40741	2.40767	1.94482	2.43501	2.34609	1.79229	4.0159	3.82146	3.17872
ENSG00000007202	11.8953	11.9766	12.009	11.9026	11.8932	11.9401	11.915	11.9294	11.9411	12.0709	11.9396	12.027	11.9697	12.0897	11.9115	11.8889	11.9885	11.9751	11.9826	12.008	11.9951
ENSG00000007216	5.84041	6.40101	6.16867	5.94924	6.03062	6.24947	5.56811	6.07797	6.3031	5.55939	5.82375	5.64236	4.92007	4.8029	5.24978	3.99875	4.18227	5.04559	2.08824	1.79214	1.88167
ENSG00000007237	5.35875	5.01415	5.55603	5.16503	4.58958	4.10193	4.55288	4.96997	4.91819	5.41679	4.93898	5.31643	5.21582	5.49628	5.38711	4.63236	5.14198	5.60379	5.63762	5.86979	5.70086
ENSG00000007255	8.85376	8.93753	8.7783	8.90187	8.68058	8.77355	8.9036	8.98028	8.87275	8.42841	8.7442	8.49788	8.44651	8.56964	8.71076	8.42961	8.39199	8.60219	8.32069	8.30889	8.23707
ENSG00000007314	6.22522	6.02093	6.19341	5.6955	6.25368	5.95931	5.94661	5.75092	6.11306	6.33783	5.91527	6.67248	6.83031	7.07137	7.04544	7.81321	7.72069	7.43842	8.52979	8.20835	8.32425
ENSG00000007341	8.02221	7.88182	8.05572	7.88373	8.19229	7.98849	7.99822	8.01351	8.09734	7.90552	7.91212	8.07589	8.19846	8.03672	8.0555	8.0282	8.00386	8.03423	8.32557	8.17184	8.18034
ENSG00000007376	8.89605	8.97915	8.65009	8.86534	8.9416	8.81854	8.90586	8.97468	8.9949	8.77384	9.03006	8.70007	9.02294	9.09773	9.14524	9.16712	9.24587	9.22604	9.3831	9.4957	9.42327
ENSG00000007384	10.1793	9.97585	9.90393	9.92423	9.89484	9.60647	9.90097	10.0671	9.93544	10.0437	10.1068	9.99597	10.2355	10.2573	10.3638	10.529	10.4898	10.2219	10.583	10.6546	10.5857
ENSG00000007392	10.0827	9.86112	9.93727	9.83575	10.03	9.96434	9.87127	9.83785	9.85991	10.0618	9.95691	9.90185	10.2169	10.2787	10.077	10.1998	10.1379	10.0049	10.1192	10.1103	10.2495
ENSG00000007402	4.95539	4.68881	5.16376	4.38752	4.66058	4.36713	4.45773	3.55657	4.35689	5.22468	4.37734	4.55653	4.79141	4.18782	3.51723	4.28631	3.72828	3.9802	4.43282	3.64332	3.43896
ENSG00000007516	8.09662	8.4594	7.99368	8.0339	8.27946	8.08983	8.03577	8.21702	8.18449	8.28798	8.15049	7.96811	7.99926	8.066	8.0555	7.38897	7.57379	7.19333	6.75923	6.31877	6.44162
ENSG00000007520	10.4815	10.4523	10.2177	10.2641	10.2886	10.2563	10.277	10.5004	10.4215	10.2086	10.4352	10.139	10.3879	10.4495	10.5471	10.4906	10.4532	10.5354	10.3631	10.4931	10.4694
ENSG00000007541	9.54629	9.58043	9.45941	9.50862	9.39634	9.2664	9.4295	9.57821	9.59118	9.56059	9.59995	9.45813	9.52468	9.53728	9.62031	9.46408	9.60647	9.51438	9.39011	9.42477	9.35875
ENSG00000007545	9.44451	9.45118	9.38009	9.39235	9.42438	9.39317	9.52595	9.26132	9.26705	9.70322	9.6421	9.33746	9.58135	9.45858	9.45868	9.54219	9.72037	9.40952	9.61666	9.46321	9.57379
ENSG00000007866	9.89832	9.91085	9.70318	9.58556	9.81344	9.7036	9.65509	9.73887	9.80596	9.94713	9.85273	9.81368	9.92263	9.75194	9.89469	9.97813	9.90078	9.86331	10.0278	10.2414	10.1267
ENSG00000007923	10.5921	10.5622	10.5333	10.4808	10.5564	10.5905	10.4638	10.537	10.4215	10.5094	10.5798	10.4957	10.5516	10.6131	10.6632	10.6086	10.484	10.6199	10.5594	10.507	10.5535
ENSG00000007944	6.42748	6.33258	6.24166	6.50282	6.42661	6.22739	6.4203	6.01386	6.3031	6.35357	6.3896	6.13235	6.03514	6.08206	6.01453	6.37474	6.08714	6.11188	6.20231	6.48669	6.09012
ENSG00000008018	11.4098	11.4109	11.4122	11.6074	11.553	11.5495	11.5581	11.6789	11.6311	11.2284	11.445	11.506	11.3326	11.2813	11.5091	11.4296	11.3983	11.55	11.4882	11.4601	11.5357
ENSG00000008056	3.28651	3.8123	4.20345	3.3174	3.24824	3.77674	3.61307	3.97095	3.72046	1.87298	3.60027	3.25497	3.60804	3.6828	4.01787	3.83016	3.31987	3.9031	3.56572	4.12283	3.02857
ENSG00000008083	9.26508	9.31978	9.16046	9.0284	9.25436	9.15013	9.12104	9.04319	8.96356	9.3121	9.24522	9.1872	9.15519	9.2661	9.18582	8.82409	8.85599	8.90619	8.4781	8.57738	8.61843
ENSG00000008086	8.28778	7.99682	8.3424	8.2896	8.32934	8.38725	8.33584	8.2075	8.56465	8.4097	8.15049	8.4697	8.32394	8.43701	8.21621	8.04756	8.36365	8.24806	8.24538	8.26721	8.16692
ENSG00000008128	9.05121	9.08419	8.92148	8.64818	9.13403	8.88737	8.79469	9.03571	8.85415	9.21894	9.09824	8.95023	9.27661	9.03909	9.21786	9.17535	9.05547	9.17319	9.37165	9.225	9.2418
ENSG00000008130	11.1093	11.2094	11.0745	11.1574	11.1045	11.149	11.1254	11.2026	11.2019	11.1336	11.2876	11.1319	11.2781	11.3561	11.3885	11.4031	11.4238	11.3683	11.3411	11.3231	11.3238
ENSG00000008226	5.31408	4.45134	5.11278	4.94932	4.35285	4.72313	4.5982	4.49392	3.96513	4.53547	5.69194	4.89469	5.37396	4.4232	5.28535	4.91125	4.92638	4.972	4.35852	3.32654	3.17872
ENSG00000008256	8.34441	8.44327	8.28023	8.27111	8.29069	8.05266	8.56712	8.51597	8.3818	8.57664	8.59072	8.48542	8.7504	8.68734	8.66422	8.95286	8.92792	8.76082	9.21169	9.26486	9.23896
ENSG00000008277	6.20089	6.23599	6.16867	6.72293	6.03062	5.84799	6.27436	5.99184	5.95206	6.09718	6.32432	6.2839	6.10899	6.14925	6.11681	5.86542	5.80042	5.33694	4.81262	4.5844	4.88948
ENSG00000008282	11.0234	10.9863	11.1996	11.2518	11.0844	11.1715	11.3975	11.2665	11.3885	11.1042	11.1531	11.2983	11.2595	11.1832	11.2114	11.275	11.2928	11.2815	11.4259	11.471	11.425
ENSG00000008283	8.73594	8.76653	8.76598	8.84985	8.73916	8.73496	8.74892	8.65206	8.80364	8.72625	8.67606	8.58511	8.4068	8.40529	8.414	8.19805	8.11855	8.25583	7.69334	7.82005	7.6023
ENSG00000008294	11.2239	11.1435	11.2178	11.1897	11.2037	11.2994	11.1883	11.1168	11.0552	11.3094	11.318	11.2595	11.3943	11.5035	11.1697	11.502	11.5817	11.3697	12.4222	12.6021	12.3498
ENSG00000008300	8.66211	8.87876	8.402	8.35253	8.59254	8.60832	8.5149	8.49656	8.38706	8.56654	8.68908	8.60827	8.64264	8.86772	8.52233	8.761	8.78829	8.53989	8.65147	8.63811	8.68582
ENSG00000008311	10.0794	10.4999	10.4173	10.3236	10.4589	10.5676	10.4691	10.2146	10.1732	10.3419	10.3017	10.1578	9.83558	9.75913	9.54627	9.08285	9.16605	9.08917	8.58785	8.43405	8.66052
ENSG00000008323	10.4301	10.6562	10.4472	10.4275	10.6356	10.6856	10.3139	10.5819	10.5606	10.545	10.5995	10.4475	10.5003	10.6348	10.6909	10.5038	10.312	10.4499	9.72738	9.78066	9.53191
ENSG00000008324	7.87621	7.56142	7.7569	7.75654	7.76285	7.59917	7.72444	7.69706	7.81469	7.52239	7.39164	7.50804	7.46477	7.27562	7.41019	7.63274	7.49104	7.89184	7.80944	7.92614	7.98522
ENSG00000008382	9.06732	9.15125	8.93325	9.14472	9.19879	9.16762	9.00173	9.28419	9.12335	9.05474	9.23045	8.93577	9.08373	8.95794	9.22985	8.87645	8.76951	8.94517	8.38759	8.51723	8.51986
ENSG00000008394	12.9137	13.0236	13.1419	13.2628	13.1918	13.2345	13.343	13.3643	13.3786	12.9679	13.1022	13.1857	13.3934	13.3745	13.5342	13.6701	13.5924	13.6869	13.4805	13.4611	13.4935
ENSG00000008405	8.97349	8.82165	8.92588	8.99498	8.8228	9.00848	8.89	8.98586	8.89138	9.02063	8.9673	9.10613	8.90351	8.78915	8.76846	9.05682	9.17831	9.22207	9.76381	9.77526	9.46954
ENSG00000008441	8.24678	8.38252	8.24516	7.88373	8.08021	7.94181	7.80879	7.96347	8.0182	8.15502	8.31636	8.30581	8.38467	8.15587	8.2925	8.16742	8.07988	8.15968	8.36879	8.47124	8.20242
ENSG00000008513	11.6729	11.893	11.8915	11.8011	11.8667	11.8808	11.8987	11.7832	11.7466	11.7779	11.7884	11.763	11.5721	11.7035	11.6363	11.5884	11.6394	11.4829	12.075	12.1298	11.9808
ENSG00000008516	5.77599	5.69731	5.39468	5.48693	5.70078	5.0593	5.20771	5.21775	4.97518	5.19002	5.50818	5.77109	5.34369	5.42577	5.2133	5.40709	5.35852	5.04559	5.11299	5.88991	5.39815
ENSG00000008517	13.6001	13.5192	13.4808	13.4831	13.4993	13.4663	13.2947	13.6754	13.6522	13.3966	13.3903	13.4137	13.5621	13.4696	13.7902	13.8962	13.8005	13.9165	14	14.0705	13.9439
ENSG00000008710	10.8129	10.9816	10.7946	10.7377	10.7502	10.7951	10.8229	10.4967	10.6645	10.957	10.9203	10.6003	10.8485	11.0424	10.7098	10.8163	10.8887	10.6746	11.0492	11.1826	10.9771
ENSG00000008735	6.64146	7.26362	6.85169	6.81519	6.84763	6.9611	6.96112	6.6558	6.6034	6.81815	6.91809	6.45974	6.70494	6.79191	7.05577	7.38897	7.3392	6.90781	8.08183	8.2863	7.68619
ENSG00000008838	10.9154	10.8805	10.7748	10.7398	10.8932	10.7777	10.762	10.7147	10.7097	10.7245	10.7908	10.6988	10.6258	10.6628	10.6169	10.5672	10.5971	10.5047	10.3608	10.411	10.3005
ENSG00000008853	10.0993	10.2227	10.0329	9.96651	10.2344	10.1474	9.84449	10.0066	9.86933	10.0702	10.2703	10.076	10.0382	10.0879	10.028	9.92024	9.79066	9.92067	9.58394	9.48582	9.55097
ENSG00000008869	9.76776	9.83662	9.90954	9.91532	9.84617	9.81139	9.92895	9.72892	9.90093	9.863	9.81955	9.83101	9.8178	9.841	9.62301	9.77394	9.87716	9.62905	9.74753	9.64076	9.72736
ENSG00000008952	11.4677	11.5226	11.5858	11.5534	11.5301	11.63	11.5769	11.6183	11.5809	11.5946	11.6167	11.7091	11.6281	11.5566	11.5305	11.5909	11.5794	11.5696	11.7159	11.7669	11.6792
ENSG00000008988	13.0713	12.9092	12.9563	13.1354	13.009	13.0433	12.9815	13.1609	13.0977	12.6535	12.7681	12.8741	12.7401	12.614	12.8628	12.8497	12.786	13.081	12.8106	12.9872	12.9562
ENSG00000009307	13.3869	13.4072	13.4655	13.4272	13.4744	13.4813	13.3854	13.4789	13.4289	13.4342	13.4175	13.505	13.4859	13.4283	13.4444	13.4796	13.5087	13.4962	13.6479	13.6302	13.6025
ENSG00000009335	11.1002	11.0719	11.2178	11.1035	11.0319	11.0241	11.3277	11.1245	11.1952	11.1551	11.1562	11.1983	11.2074	11.3292	11.1554	11.1491	11.3299	11.259	11.4293	11.4213	11.3792
ENSG00000009413	9.8561	9.82214	9.90767	9.94626	9.73542	10.058	9.98761	9.79875	9.93364	10.0713	9.96229	10.206	10.0204	10.1273	9.84935	9.7564	9.87842	9.82725	9.61818	9.4268	9.65233
ENSG00000009694	7.72232	7.84953	7.95802	8.04483	7.69682	8.07755	7.59068	7.52375	7.82248	7.54314	7.67958	7.3793	6.60639	6.84692	6.78458	5.84344	5.64424	5.7866	4.63518	4.372	4.5469
ENSG00000009724	10.4941	10.6492	10.4549	10.5008	10.6843	10.5905	10.5405	10.7731	10.7275	10.1702	10.421	10.3409	10.2148	10.3447	10.6212	10.4051	10.2906	10.3778	9.7144	9.79139	9.79142
ENSG00000009765	9.26215	9.61929	9.70533	9.55531	9.58611	9.61287	9.63076	9.46289	9.50828	9.57139	9.65893	9.5372	9.24596	9.30836	9.0935	8.8436	8.76681	8.7717	8.01689	7.64173	7.84625
ENSG00000009780	7.41908	7.21377	6.98523	7.58745	7.57345	7.56438	7.49208	7.35289	7.54041	7.58376	7.48421	7.51418	7.54012	7.47211	7.51131	7.24548	7.45791	7.43157	7.33491	7.40365	7.05056
ENSG00000009830	9.58713	9.65007	9.5559	9.56862	9.65945	9.5784	9.68821	9.68156	9.78818	9.75451	9.66333	9.65032	9.79979	9.89908	9.88022	10.1186	10.231	10.1105	10.5942	10.6605	10.5195
ENSG00000009844	10.2432	10.2477	10.416	10.4379	10.2373	10.3778	10.4124	10.4057	10.5037	10.2968	10.2746	10.508	10.4118	10.3483	10.3596	10.3661	10.4286	10.4346	10.4236	10.4807	10.4297
ENSG00000009950	12.0995	12.4525	12.1504	12.1686	12.3665	12.2818	12.2228	12.186	12.0815	12.1952	12.2228	12.0015	12.0392	12.0526	12.054	11.7348	11.6866	11.5337	11.0135	10.9283	11.0024
ENSG00000009954	10.7936	10.8884	10.7697	10.617	10.8156	10.8078	10.5267	10.6858	10.5395	11.0461	10.9381	10.9249	11.0083	11.1805	10.8795	11.1276	11.0609	11.0828	11.359	11.3355	11.2933
ENSG00000010017	10.1318	9.97585	10.0983	10.0118	10.1552	10.0996	9.99398	10.1339	10.0123	10.1008	10.0823	10.0667	10.2022	10.0444	10.1232	10.2476	10.1801	10.1806	10.5416	10.4497	10.3299
ENSG00000010030	2.85904	2.9115	2.57968	2.80304	3.42178	2.98742	2.24652	1.97681	2.21862	3.0181	2.23553	3.36785	1.44471	2.67417	1.53602	3.0094	3.19675	3.06883	1.05942	1.40173	1.48027
ENSG00000010072	8.34995	8.11696	8.19702	8.18481	8.20422	8.22407	8.37868	8.24522	8.49329	8.18173	8.2938	8.38506	8.18998	8.27598	8.23453	8.30245	8.37434	8.38903	8.45154	8.46455	8.34426
ENSG00000010165	9.59882	9.59028	9.37304	9.3214	9.45743	9.661	9.25088	9.41405	9.39798	9.55616	9.45037	9.54922	9.62519	9.70433	9.69091	9.74903	9.73228	9.73155	9.84258	9.90077	9.82313
ENSG00000010219	8.40892	8.33084	8.32571	8.43502	8.4647	8.3672	8.47315	8.23532	8.37005	8.21685	8.41373	8.2624	7.96824	7.73568	8.21759	7.97004	8.03034	8.26507	7.72325	7.87068	7.76583
ENSG00000010244	11.7073	11.676	11.7718	11.8306	11.6711	11.7953	11.8012	11.6973	11.778	11.7647	11.6903	11.8075	11.801	11.8133	11.6775	11.7596	11.7838	11.7452	11.929	11.923	11.9175
ENSG00000010256	12.4823	12.5929	12.4895	12.5634	12.6071	12.5029	12.3556	12.6555	12.5973	12.2821	12.3692	12.3371	12.2328	12.1694	12.4554	12.2449	12.1731	12.3004	12.0041	12.0533	12.0458
ENSG00000010270	9.74059	9.67792	9.84463	9.89584	9.75786	9.73131	10.0223	9.8864	10.036	9.82679	9.70881	10.0339	9.90848	9.91365	9.86854	10.1186	10.0922	10.2484	10.4551	10.5029	10.4279
ENSG00000010278	5.67363	5.83559	5.80112	6.28043	6.18309	6.15908	6.2174	6.19823	6.13823	5.95991	5.91527	5.88927	5.64614	5.85939	5.62785	6.40507	6.32622	6.31898	8.26076	8.75239	8.31212
ENSG00000010292	9.44417	9.50994	9.18534	9.1971	9.42975	9.42927	9.1191	9.22643	9.15143	9.43374	9.3391	9.28568	9.3467	9.27365	9.35023	9.26752	9.17424	9.11076	9.10212	9.09113	9.06184
ENSG00000010295	9.38601	9.43848	9.24869	9.21898	9.38328	9.26564	9.24377	9.3911	9.38753	9.28567	9.43499	9.1561	9.28631	9.33506	9.369	9.0592	9.05522	9.11076	8.36405	8.6529	8.46245
ENSG00000010310	7.04834	6.77213	6.6872	6.59493	6.83233	6.45339	6.83428	6.69721	6.63911	6.88468	6.74597	6.67248	6.9151	7.15002	7.00333	7.18559	7.30234	7.0753	7.9615	8.18818	7.98012
ENSG00000010318	6.69471	6.62732	7.06784	6.78943	6.90724	6.43424	6.66357	6.21733	6.56679	6.61104	6.62468	6.48499	6.5412	6.37186	6.7468	6.65268	6.66501	6.56405	6.41886	6.48669	6.51405
ENSG00000010319	4.63054	4.76001	5.47761	4.85312	5.22641	4.78488	4.95247	5.75092	5.44744	6.1878	5.62122	5.52555	6.87333	7.24523	6.57056	7.27041	7.3319	7.0753	6.89684	6.33354	6.7362
ENSG00000010322	11.3544	11.5778	11.4791	11.2896	11.4965	11.3634	11.3675	11.3293	11.2825	11.4515	11.4823	11.2799	11.4003	11.5316	11.3679	11.3894	11.3847	11.2901	11.2399	11.196	11.1266
ENSG00000010327	2.85904	3.34108	2.57968	2.80304	2.21529	2.15875	2.64235	1.56437	2.82595	3.0181	3.74033	3.36785	2.97972	2.40767	3.10429	2.17828	2.09341	2.56737	2.08824	1.40173	2.19535
ENSG00000010361	7.67011	7.44741	7.59917	7.70235	7.37663	7.00068	7.54512	7.61301	7.44277	7.33682	7.48421	7.02209	7.41469	7.27562	7.5188	7.05778	7.23353	7.51814	6.87034	6.70678	7.09846
ENSG00000010379	6.4483	6.46633	6.11787	5.92579	6.25368	6.08737	5.92898	5.87641	6.45104	6.42982	5.88541	5.68656	5.43266	6.19236	5.45116	5.3768	5.38696	5.30732	3.91583	3.73514	4.60111
ENSG00000010404	9.92353	9.86072	10.0192	9.9365	9.86816	9.77339	10.0319	9.86974	9.82759	10.0661	9.81193	9.97857	9.9229	10.1291	9.94668	10.5183	10.5394	10.3458	11.4959	11.6184	11.347
ENSG00000010438	3.61584	3.14222	3.45366	2.9956	2.21529	2.76032	3.20786	2.29718	3.25204	1.87298	1.16121	2.99866	3.2646	2.40767	2.74412	3.73785	2.74808	3.64351	1.66366	2.09909	3.43896
ENSG00000010539	8.40956	8.22157	8.41784	8.2286	8.31841	8.42653	8.21375	8.14901	8.22029	8.47953	8.48516	8.38841	8.43219	8.4007	8.20232	8.46603	8.25982	8.28271	8.38759	8.30515	8.40266
ENSG00000010610	10.2024	10.5218	10.3948	10.3613	10.2928	10.3538	10.4076	10.3603	10.406	9.95231	10.0724	10.135	9.43549	9.34703	9.73981	9.18907	9.10957	9.17776	8.3593	8.19224	8.42161
ENSG00000010626	7.22884	7.01226	6.68179	6.57516	6.67575	6.83745	6.40457	6.62623	5.9785	6.58727	6.66356	6.69916	6.53558	6.67701	6.58134	6.60161	6.251	6.67186	6.29007	6.17469	6.48017
ENSG00000010704	7.72232	7.64843	7.68891	7.88373	7.86409	7.82173	7.8655	7.84564	7.74267	7.76541	7.73086	7.74593	7.64934	7.78539	7.47325	7.23708	7.57379	7.19333	6.34382	6.43286	6.3176
ENSG00000010803	9.76776	9.79697	9.66166	9.71265	9.7477	9.74885	9.71546	9.73887	9.7842	9.73059	9.83526	9.66834	9.67466	9.83591	9.80867	9.88436	9.9397	9.73016	10.0922	10.0701	9.88179
ENSG00000010810	8.52185	8.026	8.11521	7.94918	7.89386	7.92819	8.02751	8.05126	7.99772	8.31235	8.31636	8.42474	8.43219	8.37754	8.16461	8.89527	8.9543	8.85082	9.7976	9.91679	9.759
ENSG00000010818	9.10058	8.80912	8.8462	8.93456	8.69756	8.65454	8.94804	8.67297	8.91341	9.16593	9.09021	9.13632	8.77613	9.07487	8.78409	8.94514	9.07721	9.00405	10.2157	10.2374	10.0713
ENSG00000010932	5.63783	6.13247	6.16867	6.14478	6.40609	6.0375	5.92898	6.42878	5.83379	5.58629	5.62122	6.0836	5.21582	4.49383	5.48215	3.53337	3.6365	3.64351	2.08824	0.864807	2.45286
ENSG00000011007	11.1376	11.1894	11.2506	11.0435	11.1819	11.2379	10.9933	11.1188	11.0444	11.1262	11.1029	11.0996	11.0034	11.0525	10.9253	11.0061	10.9995	10.9663	11.2814	11.3114	11.2658
ENSG00000011009	11.141	11.0733	11.0923	11.1186	11.0237	10.9166	11.0299	11.1443	11.2319	10.9079	11.0707	11.0356	11.0189	11.0054	11.2655	11.4237	11.3452	11.3288	11.6121	11.567	11.5566
ENSG00000011021	10.7374	10.8203	10.9172	10.831	10.8204	10.8097	10.8013	10.6564	10.8373	10.8386	10.7665	10.6934	10.6021	10.7628	10.659	10.757	10.7335	10.4825	10.7293	10.7298	10.6879
ENSG00000011028	1.80823	1.85184	1.80282	2.3179	2.55049	2.49067	1.6992	3.1424	3.05467	2.18603	3.0736	2.68677	2.97972	2.67417	1.94482	3.29504	2.56104	1.79229	3.42719	3.90291	3.43896
ENSG00000011052	5.79367	6.35713	4.6269	5.48276	6.64631	4.70918	4.81372	6.57576	5.45827	6.22457	5.84222	5.23007	5.35769	6.44695	5.19994	6.72924	5.33214	5.35529	6.28185	6.59689	6.11436
ENSG00000011105	10.5311	10.8358	10.8652	10.6424	10.6629	10.7567	10.7152	10.7438	10.7378	10.6467	10.7562	10.537	10.5442	10.5051	10.5815	10.3709	10.3905	10.3536	10.1051	10.1135	10.0435
ENSG00000011114	10.1075	10.1266	10.2969	10.1204	10.135	10.3045	10.2848	10.12	10.2731	10.3438	10.2248	10.3717	10.1873	10.3121	10.1232	10.3061	10.4149	10.1928	10.4372	10.4514	10.4474
ENSG00000011132	9.27094	9.2473	9.25458	9.29189	9.10644	9.01815	9.24911	9.31556	9.16068	9.16593	9.30566	9.19487	9.35023	9.37481	9.38344	9.51703	9.43268	9.39393	9.53418	9.56145	9.38901
ENSG00000011143	8.02221	8.13716	8.1022	7.97227	8.14973	7.9553	7.72954	8.08805	8.0384	7.80603	7.99136	7.89935	7.74509	7.80635	7.98693	7.65814	7.86416	7.72828	6.9099	6.87769	7.12645
ENSG00000011198	9.12987	9.05897	9.04283	9.31239	9.31064	9.3851	9.27026	9.25906	9.04233	9.16146	9.41423	9.24561	9.04428	9.09205	9.0809	9.22777	9.26515	9.19201	9.84938	9.89331	9.73496
ENSG00000011201	4.83408	4.53491	5.55603	4.85312	5.02587	5.0593	4.95247	4.77747	4.59366	4.96252	4.87962	5.13693	4.87845	5.31309	5.0574	4.52597	5.26966	4.53436	5.50614	5.36575	4.84524
ENSG00000011243	11.4025	11.4525	11.1866	11.2838	11.3685	11.2571	11.1598	11.3122	11.2161	11.3822	11.4231	11.2135	11.3316	11.3837	11.2983	11.309	11.1734	11.2272	11.0398	11.076	11.0856
ENSG00000011258	9.19598	9.29902	9.11585	9.25707	9.1717	9.23278	9.26324	9.04854	9.4238	9.33607	9.25984	9.28388	9.11095	9.10621	9.00824	8.98334	9.14955	9.01095	9.02915	8.93532	8.97982
ENSG00000011260	8.56538	8.39934	8.69411	8.40437	8.55576	8.62951	8.58412	8.62371	8.62821	8.55297	8.60911	8.64514	8.87998	8.88425	8.86862	9.10149	9.02613	8.9331	9.45171	9.37065	9.48223
ENSG00000011275	10.2683	10.202	10.1329	10.1261	10.1279	10.1736	10.1207	10.1532	10.1315	10.3947	10.3455	10.2051	10.3273	10.4226	10.3751	10.4012	10.4649	10.4247	10.7288	10.6585	10.6324
ENSG00000011295	9.82531	9.80751	9.90954	9.84984	9.8819	9.81694	9.80196	9.90419	9.9046	9.9639	9.8738	10.0276	10.0168	10.0634	10.0055	10.0967	10.2437	10.1458	10.6262	10.5821	10.4866
ENSG00000011304	12.816	12.859	12.7742	12.7924	12.8018	12.7168	12.8125	12.8988	12.8741	12.8433	12.9977	12.8165	13.0395	13.0938	13.0757	13.1903	13.1939	13.1117	13.3427	13.3883	13.3158
ENSG00000011347	10.9358	11.1584	10.9665	11.0041	10.9902	11.105	11.1837	10.9634	10.7633	10.7492	10.8286	11.0862	10.1517	10.1924	10.5138	10.0423	9.77056	9.81415	9.60819	9.67304	9.72126
ENSG00000011376	9.89453	9.96836	9.92809	9.82311	9.92219	9.83347	9.73715	9.86384	9.7762	9.863	9.84886	9.78982	9.85583	9.84944	9.85676	9.78839	9.73089	9.73155	9.5426	9.64963	9.55955
ENSG00000011405	11.2117	11.332	11.4447	11.4369	11.3876	11.4771	11.472	11.2038	11.4794	11.4215	11.3728	11.5942	11.4812	11.4579	11.3108	11.4985	11.6001	11.395	11.7644	11.6969	11.6502
ENSG00000011422	3.08855	4.05811	4.10255	4.31715	3.71653	3.35625	3.92907	3.87797	4.66467	3.92619	4.37734	4.7355	4.79141	4.27062	4.88259	5.34586	5.69062	5.24621	8.32069	8.62617	7.87953
ENSG00000011426	8.24082	7.52099	7.96522	7.76978	7.39756	7.79196	7.95096	7.96912	7.98391	8.24219	8.18768	8.40173	8.16855	7.9133	7.97063	7.49147	7.77551	7.96479	7.48214	7.38251	7.89588
ENSG00000011451	10.8776	11.0102	10.8252	10.6451	10.8126	10.7107	10.5427	10.7756	10.586	10.8281	10.9696	10.7222	10.9666	10.9698	10.9573	11.092	10.945	10.9663	11.0685	11.0472	11.036
ENSG00000011454	10.0473	10.0146	10.1497	9.85916	10.0956	10.095	9.8919	9.89087	9.85232	10.1478	10.0423	10.0936	9.94297	9.99504	9.90187	9.93201	9.9397	9.8985	10.0082	9.82574	9.89947
ENSG00000011465	4.21062	3.8123	3.08186	3.99528	3.84402	3.89347	3.32032	4.14066	3.42564	3.64837	3.0736	4.5081	3.60804	2.67417	3.93069	3.91692	3.72828	1.40186	3.42719	3.06865	2.86097
ENSG00000011478	8.42539	8.64953	8.66786	8.65676	8.58343	8.7113	8.86008	8.49264	8.83091	8.56316	8.47015	8.53462	8.35841	8.34447	8.52977	8.26159	8.47383	8.21256	8.12729	8.12169	8.21551
ENSG00000011485	11.0398	11.1469	10.9807	10.9301	11.0419	11.062	10.997	11.0418	10.9508	10.9619	10.9802	10.8284	10.9077	10.9767	10.8478	10.8863	10.8473	10.7556	10.8064	10.9173	10.823
ENSG00000011523	8.57487	8.79223	8.72838	8.68148	8.48905	8.55171	8.37543	8.63085	8.37122	8.68017	8.51959	8.56453	8.96198	8.90384	9.032	9.61273	9.72254	9.52031	10.0352	10.1442	9.9924
ENSG00000011566	9.58947	9.64067	9.6705	9.69194	9.54448	9.61712	9.6869	9.7105	9.72105	9.8282	9.67865	9.71577	9.68526	9.67042	9.53522	9.72519	9.70005	9.63502	10.0367	9.93989	9.96682
ENSG00000011638	3.61584	2.29702	3.87673	2.3179	4.06949	3.18359	3.99832	3.87797	2.82595	3.8394	2.84444	3.90547	4.3178	3.6828	4.17787	4.73143	4.04622	4.25298	6.43702	6.44651	6.3176
ENSG00000012048	6.64146	6.60815	6.31115	6.38734	6.32098	6.37524	6.23186	6.15925	5.92339	6.80675	6.25594	6.25483	6.44467	6.72007	6.3019	6.44941	6.17131	6.39133	6.06888	6.05935	6.2343
ENSG00000012061	9.06732	9.16443	9.14785	9.15737	9.08724	9.05308	8.9869	9.16134	9.10432	9.00327	8.97441	9.11424	8.95698	8.82726	9.0809	8.98082	9.03514	9.12992	9.1931	9.60013	9.30373
ENSG00000012124	4.00115	4.61391	4.29776	4.08273	4.66058	4.10193	4.06441	3.77859	3.84798	4.08553	4.19458	4.04781	3.60804	2.67417	2.74412	2.84213	3.81457	2.92024	2.68268	4.4281	3.55337
ENSG00000012171	8.78995	8.66352	8.3698	8.15989	8.42931	8.24619	8.00244	8.39535	8.18449	8.57328	8.56269	8.33734	8.60803	8.90708	8.63003	8.65457	8.7641	8.44109	7.99866	7.90652	8.0597
ENSG00000012174	9.88883	9.84248	10.055	10.2594	9.98232	10.0172	10.2064	9.91079	10.2078	9.94769	10.0126	10.0467	10.0674	10.0182	9.88892	9.8722	10.1952	9.91259	10.1512	10.0378	9.95776
ENSG00000012211	8.29355	8.15708	7.84543	7.7297	7.94454	7.76157	7.6777	7.91749	7.99083	7.94762	8.09286	7.83698	8.01855	8.19349	8.27048	8.60317	8.59459	8.45128	8.71983	8.82733	8.77695
ENSG00000012232	10.3903	10.1746	10.2911	10.2734	10.276	10.1908	10.319	10.1785	10.2517	10.313	10.2846	10.3452	10.3879	10.4606	10.3226	10.4603	10.6168	10.4121	10.7503	10.7879	10.6706
ENSG00000012504	10.6925	10.7834	10.906	10.9622	10.9097	10.9917	10.8705	10.9823	10.9084	10.7153	10.6886	10.7744	10.438	10.2675	10.4288	9.89241	9.84164	10.0526	8.4737	8.13017	8.55461
ENSG00000012660	11.8578	11.9479	12.1401	12.1752	12.039	12.0914	12.2196	12.0634	12.2381	11.9528	11.9874	12.0641	11.9814	12.0768	11.9907	12.1864	12.2765	12.1314	12.5558	12.4586	12.383
ENSG00000012779	4.21062	3.8123	3.08186	2.9956	4.35285	3.89347	3.20786	3.55657	3.96513	3.74704	3.74033	2.50124	3.60804	3.41804	3.73872	2.65288	2.09341	2.75457	3.8083	3.98	3.7581
ENSG00000012822	10.5649	10.8004	10.5798	10.5351	10.6981	10.5621	10.4963	10.4738	10.5061	10.5432	10.629	10.4216	10.303	10.3649	10.346	10.2159	10.233	10.0626	9.98056	10.1505	10.0617
ENSG00000012963	8.95178	8.92836	9.01881	9.16239	9.00095	9.09939	9.26148	9.13144	9.29543	9.00576	8.98846	9.14625	8.806	8.91996	8.93172	8.80696	8.72007	8.66775	8.51683	8.59551	8.55804
ENSG00000012983	9.73212	9.77994	10.026	9.89433	9.86696	9.86598	9.92895	9.74382	9.75602	10.069	9.93521	9.95703	10.057	10.0057	9.93445	10.085	10.1136	10.0681	10.5044	10.5086	10.4539
ENSG00000013016	6.56727	6.71952	6.54062	6.63887	6.68684	6.35503	6.64209	6.64173	6.00775	6.72438	6.58806	6.45974	6.19628	6.56467	6.80924	6.3121	6.3553	6.60113	5.94742	6.11168	6.10895
ENSG00000013275	10.9901	10.8924	10.8575	10.8791	10.9322	10.962	10.839	11.0604	10.9121	10.8337	10.9013	10.9318	10.9013	10.9032	11.125	11.1768	11.0493	11.149	11.3057	11.2997	11.3056
ENSG00000013288	11.3756	11.4531	11.3969	11.2304	11.4371	11.4222	11.1725	11.2694	11.1764	11.3189	11.4321	11.2767	11.2026	11.2221	11.2171	11.0325	10.9821	11.0424	10.7818	10.8006	10.7181
ENSG00000013297	4.83408	4.61545	5.05993	4.6956	4.76223	5.10843	5.42452	5.48191	5.56347	5.22468	4.93898	5.54968	5.46114	5.19085	6.28443	5.62891	5.62048	5.90995	4.91985	4.63295	5.20164
ENSG00000013306	11.3817	11.4464	11.3461	11.44	11.4546	11.4008	11.342	11.5327	11.5296	11.2507	11.2969	11.2322	11.2615	11.2004	11.3895	11.3794	11.2786	11.3848	11.3891	11.4244	11.2361
ENSG00000013364	9.66033	9.72517	9.4495	9.37218	9.63982	9.64444	9.15097	9.50268	9.29264	9.53324	9.56078	9.46608	9.58845	9.44832	9.49269	9.54794	9.35427	9.46607	9.60178	9.68748	9.63457
ENSG00000013374	10.5649	10.4842	10.644	10.4656	10.5783	10.6394	10.4645	10.602	10.4304	10.5637	10.5972	10.5103	10.6132	10.6052	10.5361	10.6715	10.5206	10.6017	10.7412	10.7519	10.649
ENSG00000013375	11.5602	11.5907	11.711	11.7015	11.6241	11.653	11.7308	11.7222	11.6678	11.5934	11.6409	11.7235	11.7216	11.6107	11.6687	11.5439	11.6715	11.6209	11.5459	11.6147	11.5966
ENSG00000013392	8.49708	8.65421	8.55305	8.56863	8.64601	8.53384	8.6037	8.58746	8.52703	8.34816	8.62275	8.50715	8.29259	8.14494	8.17886	7.83565	7.91876	8.06109	7.57529	7.47196	7.39545
ENSG00000013441	10.9848	11.0587	11.0569	11.1498	11.1461	11.1223	11.1264	11.0925	11.0503	10.9606	11.0467	11.0144	10.9276	10.9361	10.7342	10.821	10.8364	10.7821	10.9198	10.9185	10.8365
ENSG00000013503	9.42066	9.58783	9.51722	9.3613	9.50885	9.52512	9.33862	9.54457	9.36105	9.34397	9.55842	9.41937	9.51235	9.42592	9.34602	9.18689	9.09671	9.32541	9.18237	8.97352	9.01768
ENSG00000013523	10.2064	10.2924	10.2824	10.4036	10.2526	10.3959	10.4761	10.1849	10.2826	10.3328	10.2864	10.2555	10.3381	10.3899	10.2286	10.2487	10.3085	10.2023	10.048	9.94756	10.161
ENSG00000013561	10.7482	10.8035	10.8966	11.0332	10.8987	10.9075	11.056	10.9232	11.0478	10.8553	10.8168	10.9438	10.8967	10.9463	10.9246	11.1105	11.0626	10.971	11.2328	11.1899	11.1392
ENSG00000013563	9.26215	9.34894	9.36217	9.27806	9.28558	9.21045	9.01642	9.36778	9.2842	9.24192	9.20951	9.1403	9.41926	9.41231	9.52596	9.69328	9.61544	9.50898	9.91565	9.78469	9.73041
ENSG00000013573	7.78021	7.93502	7.4449	7.84374	7.8376	7.83639	7.74745	7.97035	7.62661	8.14967	8.01224	7.67946	8.25843	8.08443	7.91913	8.12454	7.96458	8.05233	7.91534	7.95038	7.97402
ENSG00000013583	11.3592	11.2845	11.3105	11.407	11.4019	11.3558	11.3415	11.4783	11.4787	11.1785	11.358	11.2322	11.1434	11.0386	11.3417	10.9799	10.9239	11.1338	10.4168	10.4615	10.4722
ENSG00000013588	6.07267	5.54437	6.21774	5.54966	5.88995	5.56083	5.63487	6.17887	6.11306	6.07835	5.69194	6.01592	5.62112	5.31309	5.70869	5.40709	5.17497	5.67508	7.28564	7.35383	6.78386
ENSG00000013619	9.1427	9.57555	9.4131	9.10872	9.29956	9.41714	8.96544	9.12892	9.12019	9.05233	8.90912	9.11019	8.50238	8.66456	8.51111	8.00858	8.10149	7.95528	8.37822	8.36026	8.04511
ENSG00000013810	8.01525	7.6946	7.59917	7.5949	7.60979	7.65811	7.61844	7.55412	7.48262	8.10008	7.99947	7.95516	7.98462	7.74975	7.72719	7.63913	7.70947	7.5374	7.77415	7.53719	7.83498
ENSG00000014123	10.2192	10.2859	10.4676	10.5486	10.3054	10.4641	10.56	10.3592	10.4506	10.375	10.349	10.4871	10.3427	10.1507	10.1208	9.95141	10.2103	9.98638	9.69566	9.64372	9.56468
ENSG00000014138	6.35921	6.30333	7.1586	6.41018	6.49036	6.51153	6.96623	6.6195	6.95233	6.92254	6.50153	6.70808	6.31509	6.92568	7.28079	6.28984	6.33559	6.39697	5.58222	5.72053	6.15769
ENSG00000014164	9.63104	9.76487	9.61205	9.43792	9.71888	9.5784	9.48304	9.49064	9.51069	9.6145	9.63445	9.42264	9.64239	9.76271	9.81325	9.90706	9.8557	9.71755	9.82026	9.88206	9.70897
ENSG00000014216	12.3118	12.4227	12.2209	12.2035	12.2822	12.2788	12.1053	12.3457	12.2609	12.2844	12.2891	12.2354	12.277	12.2625	12.3383	12.2842	12.2769	12.2898	12.3081	12.314	12.2741
ENSG00000014257	3.08855	2.63673	3.27971	3.80268	2.8223	2.76032	3.32032	2.97291	3.84798	1.47262	2.23553	2.99866	2.81297	3.41804	2.26299	2.17828	1.78688	0.864901	1.05942	1.79214	0.922201
ENSG00000014641	11.7509	11.7385	11.8307	11.8611	11.8407	11.9549	11.726	11.9217	11.8334	11.5137	11.5289	11.6663	11.4172	11.2763	11.5962	11.2254	11.183	11.3724	10.8099	10.8661	10.9275
ENSG00000014824	10.7217	10.6445	10.9041	10.8638	10.757	10.7768	10.8968	10.7496	10.7562	10.7373	10.726	10.796	10.7443	10.679	10.6445	10.5963	10.6942	10.6453	10.5625	10.5344	10.5883
ENSG00000014914	7.55005	7.80814	7.66257	7.55724	7.47839	7.46413	7.56237	7.54659	7.58685	7.8894	7.66207	7.69274	7.76807	7.79241	7.66102	8.11333	8.17265	7.73385	7.89077	7.91636	7.90129
ENSG00000014919	10.1633	10.3034	10.204	10.3537	10.3065	10.4132	10.2639	10.3694	10.3572	10.2444	10.1751	10.1184	10.1388	10.0641	10.0766	10.0104	10.0572	9.86509	9.85579	9.63348	9.62489
ENSG00000015133	10.413	10.4156	10.2767	9.96795	10.2872	10.3525	9.85969	10.1251	9.83126	10.5059	10.4684	10.3349	10.4045	10.4249	10.3585	10.2736	10.1832	10.3363	10.0822	9.88707	10.1744
ENSG00000015153	8.38817	8.49636	8.55305	8.55722	8.48905	8.43136	8.50304	8.60932	8.5831	8.59663	8.35501	8.58802	8.60165	8.34447	8.43395	8.3461	8.53229	8.5142	8.70866	8.6617	8.50572
ENSG00000015171	10.8357	10.8379	10.8132	10.8047	10.8214	10.8865	10.7407	10.8623	10.7076	10.9924	10.9207	11.0618	11.0725	11.0757	10.9608	11.0803	11.0081	10.9892	11.1588	11.1782	11.0689
ENSG00000015285	6.4483	7.03871	6.37743	6.24296	6.59919	6.82074	6.76641	6.68354	6.45104	6.69995	6.62468	6.29821	6.5412	6.51459	6.36977	6.49242	6.1214	6.2428	5.78672	5.74282	5.65034
ENSG00000015413	2.58599	4.05811	3.45366	3.90219	3.24824	3.51044	3.42464	3.67184	4.35689	2.66124	3.2713	3.36785	3.88525	3.79894	4.01787	3.91692	3.43332	3.73533	2.68268	3.64332	2.45286
ENSG00000015475	8.46679	8.50156	8.1661	8.27575	8.31841	8.37224	8.27085	8.77642	8.5739	8.53237	8.59534	8.59963	8.79583	8.67979	8.91762	9.40706	9.27088	9.42701	9.7566	9.68748	9.73344
ENSG00000015479	12.0772	11.7946	11.9519	11.9999	12.0939	12.0734	11.7982	12.0822	12.0809	12.1368	12.0428	12.1668	12.1982	11.9974	12.0384	12.0976	12.17	12.1557	12.1868	12.299	12.3227
ENSG00000015520	11.3003	11.4771	11.4891	11.4348	11.4205	11.4094	11.3667	11.3457	11.4362	11.3254	11.4276	11.2158	11.4054	11.4294	11.4549	11.367	11.4057	11.2527	11.0501	10.9252	11.028
ENSG00000015532	9.69776	9.61209	9.42359	9.16239	9.54448	9.43169	9.14032	9.43256	9.30935	9.51475	9.6434	9.32815	9.49696	9.7099	9.5699	9.46219	9.27469	9.35466	8.9586	8.98292	9.1689
ENSG00000015568	8.13315	8.20852	9.08023	8.59128	7.11491	9.31323	8.18545	5.31424	7.54972	8.62623	9.3418	9.37205	7.94887	9.0541	7.03743	8.19931	8.61818	7.193	8.63912	7.73975	8.62387
ENSG00000015676	10.9089	10.9648	11.0219	10.9034	10.9598	10.9109	10.9254	10.9858	10.9212	10.9321	11.0004	10.9232	10.8783	11.0034	10.9833	11.0797	11.091	11.058	11.1374	11.0656	11.0974
ENSG00000016391	11.3715	11.5592	11.3489	11.3331	11.4484	11.4198	11.2984	11.296	11.2249	11.3438	11.3909	11.2471	11.1841	11.1377	11.2575	10.6455	10.6295	10.6497	9.48046	9.45746	9.52492
ENSG00000016490	3.61584	3.34108	3.87673	3.3174	3.96115	3.51044	2.80582	3.97095	3.05467	2.18603	1.16121	3.47254	3.38839	4.09998	4.01787	3.0094	2.09341	4.31382	3.42719	1.79214	4.37087
ENSG00000016864	10.5053	10.5758	10.5961	10.5438	10.6433	10.6947	10.6414	10.6807	10.5489	10.4828	10.4544	10.5728	10.3351	10.3649	10.3627	10.1878	10.1115	10.3141	9.69943	9.61682	9.73648
ENSG00000017260	10.7345	10.7791	10.8584	10.922	10.7305	10.858	11.033	10.7723	10.991	10.9561	10.8692	10.9145	10.9302	10.9073	10.8063	10.973	11.0207	10.9804	11.2988	11.2703	11.1737
ENSG00000017483	3.28651	2.9115	3.60888	3.69579	3.05093	3.77674	3.52193	3.43127	3.25204	3.30397	2.84444	3.25497	2.40741	2.89903	3.93069	3.41912	3.97306	3.54545	3.91583	3.54526	4.24032
ENSG00000017797	11.7968	11.7701	11.6916	11.55	11.8205	11.75	11.4758	11.713	11.4953	11.8114	11.7712	11.7819	11.7586	11.8198	11.7851	11.7254	11.6697	11.7096	11.8524	11.8498	11.7581
ENSG00000018189	10.1025	10.0977	10.0834	10.0475	10.0047	9.95933	9.97907	10.0161	9.9709	10.1967	10.153	10.1782	10.4336	10.4781	10.2252	10.5221	10.5468	10.4217	10.8203	10.7402	10.6674
ENSG00000018280	3.46055	3.94044	4.46967	4.24316	4.17025	4.00146	2.64235	4.14066	3.58056	3.64837	2.84444	3.47254	2.81297	2.89903	2.52352	2.43501	2.34609	1.40186	4.0159	2.75439	1.88167
ENSG00000018408	7.45037	7.06706	7.56164	7.41285	7.07257	7.12527	7.34695	7.43678	7.35961	7.62974	7.33752	7.69815	7.2773	7.36313	7.29273	6.89634	7.13636	7.15227	7.4104	7.70554	7.52729
ENSG00000018510	10.3903	10.4197	10.5833	10.6032	10.527	10.5862	10.565	10.5837	10.7562	10.683	10.6414	10.7602	10.9019	10.9064	10.7301	11.0566	11.1388	10.9915	11.3756	11.3226	11.3879
ENSG00000018610	8.20457	8.0687	8.36436	8.35253	8.11855	7.99504	8.23901	8.24056	8.25522	8.25482	8.12516	8.14484	8.25648	8.30081	8.09614	8.24911	8.51307	8.32026	8.28096	8.30515	8.25409
ENSG00000018625	3.08855	2.29702	3.99405	3.3174	2.8223	3.64972	3.7797	4.3628	3.05467	3.54245	4.09372	3.66156	4.11768	5.1032	4.51407	5.31425	4.30659	4.25298	3.8083	3.64332	4.49058
ENSG00000018699	8.45655	8.09647	8.49948	8.23339	8.46445	8.40702	8.28824	8.59843	8.41307	8.43212	8.48516	8.4506	8.60165	8.45482	8.64723	8.57343	8.68899	8.67066	8.82013	8.80895	8.70451
ENSG00000018869	5.70857	5.58415	6.24166	6.24296	6.08325	6.11167	5.92898	5.96948	5.77081	5.44646	5.82375	5.79147	5.46114	5.77682	5.68224	5.60297	5.96039	5.74302	5.60586	6.12871	5.90858
ENSG00000019102	3.75603	3.67166	3.74901	2.3179	2.8223	3.64972	3.69879	3.77859	3.96513	3.42813	3.60027	3.1325	3.2646	3.90642	3.93069	3.53337	3.89599	3.44023	2.90777	2.92006	3.8505
ENSG00000019144	9.9828	9.86919	9.64382	9.57617	9.76794	9.71554	9.61154	9.55212	9.46914	9.8282	9.8585	9.69969	9.74584	9.90233	9.77309	9.67161	9.66709	9.59575	9.99749	9.93505	10.0125
ENSG00000019485	8.09662	8.15047	8.19702	8.0718	8.25098	8.16723	8.08436	8.01896	8.05832	8.30427	8.42415	8.10468	8.33167	8.43701	8.19298	8.08082	8.15622	8.25583	8.04677	8.18818	8.09791
ENSG00000019505	4.10968	2.63673	3.74901	3.80268	3.71653	2.15875	3.85632	2.97291	3.84798	4.22901	4.09372	3.57014	4.04428	4.09998	2.93542	3.41912	3.97306	3.44023	5.06708	4.4281	4.43196
ENSG00000019549	9.34497	9.19366	9.20677	9.3613	9.24284	9.38759	9.35687	9.36992	9.41095	9.342	9.24816	9.29641	9.0653	8.75001	9.09099	8.6323	8.83033	8.83014	9.90753	10.059	9.68721
ENSG00000019582	9.94484	9.99443	9.94458	9.88675	9.92939	9.91168	9.62666	10.0802	9.85612	9.53388	9.93156	9.72109	9.49006	9.58604	9.79794	9.51355	9.51754	9.48933	9.19844	9.10841	9.14401
ENSG00000019995	10.4764	10.3935	10.5806	10.5804	10.5375	10.5432	10.5547	10.509	10.5124	10.5606	10.4729	10.4943	10.3795	10.3715	10.352	10.4115	10.4914	10.4061	10.6188	10.5538	10.5476
ENSG00000020129	8.671	8.5273	8.6093	8.49083	8.49877	8.47885	8.75644	8.33541	8.53179	8.8028	8.64965	8.39841	8.62387	8.61788	8.62657	8.71332	8.70884	8.5077	8.91714	9.00384	8.88741
ENSG00000020181	3.61584	2.9115	1.1664	2.9956	3.84402	2.76032	1.99866	2.97291	2.55401	3.8394	2.23553	2.99866	3.2646	3.55648	2.74412	3.99875	1.39713	3.64351	3.27393	3.90291	3.65936
ENSG00000020256	8.52675	8.55759	8.41258	8.31691	8.29628	8.4553	8.17314	8.5801	8.5831	8.59332	8.44478	8.44418	8.73299	8.68734	8.78098	8.76393	8.7312	8.72487	8.80622	8.83772	8.89827
ENSG00000020426	8.06327	8.17021	8.09565	8.48683	8.49877	8.44577	8.27783	8.52367	8.21439	8.15502	8.41895	8.33734	8.27264	8.23532	8.42998	8.56001	8.48044	8.73046	8.75284	8.87352	8.80897
ENSG00000020577	10.7628	10.6873	10.6008	10.4605	10.5886	10.5287	10.4584	10.5408	10.4368	10.9009	10.8558	10.8467	10.8875	11.0027	10.7723	10.8433	10.8575	10.8193	10.8554	10.8975	10.8145
ENSG00000020922	8.6886	8.73153	8.86172	8.79911	8.85343	8.95239	8.91484	8.76673	8.7475	8.86729	8.86389	8.86541	8.93431	8.82384	8.68435	8.88723	9.0125	8.80387	9.36424	9.32705	9.36376
ENSG00000021300	7.67894	7.26362	7.41154	7.29878	7.81824	7.32556	7.49208	7.46102	7.59597	7.52934	7.58055	7.59757	7.31679	7.41865	7.23931	7.16801	6.98642	7.36844	6.82967	6.61308	6.7362
ENSG00000021355	10.8957	10.7575	10.8862	10.8483	10.8435	10.8078	10.7388	10.8856	10.745	10.6807	10.6854	10.8327	10.8287	10.7529	10.8751	11.059	10.9456	11.0547	11.0858	11.1331	11.0175
ENSG00000021461	8.78586	9.14461	9.14151	8.92275	9.04474	9.19062	8.87397	8.59478	8.71441	8.75024	8.68908	8.42148	7.66778	7.90685	7.94861	6.63999	6.85005	6.86779	5.57338	5.21444	5.57108
ENSG00000021488	6.65943	7.09487	7.06784	7.07182	7.08553	7.41615	7.09362	6.59867	6.92598	7.08661	7.24647	6.84815	7.00488	6.74924	7.04544	6.42	6.59359	6.68413	6.40046	5.8077	5.70086
ENSG00000021574	9.33941	9.13794	9.45463	9.49482	9.20474	9.49079	9.51588	9.44071	9.55575	9.38094	9.35281	9.50671	9.4065	9.55747	9.28142	9.3691	9.5912	9.45767	9.60217	9.55044	9.43451
ENSG00000021645	9.40211	9.30498	9.23087	9.24764	9.23123	9.29512	9.36508	9.28419	9.35032	9.33011	9.32248	9.41281	9.04663	8.97963	8.90051	8.74033	8.78829	8.80122	8.34494	8.26721	8.3757
ENSG00000021762	6.07267	5.96176	5.05993	6.03944	5.44328	5.62976	5.34698	5.75092	5.92339	6.09718	5.82375	5.42477	6.56763	6.27491	6.19372	6.69011	5.97919	6.19509	6.82967	7.03048	6.88564
ENSG00000021776	9.85999	10.0164	10.145	10.0132	9.86132	10.0375	10.0673	9.91593	10.0326	10.0582	10.0541	10.053	10.0464	10.1077	10.0068	9.99692	10.0281	9.88227	10.098	9.985	9.97326
ENSG00000021826	12.4375	12.7796	12.8557	12.6218	12.8328	12.972	12.3615	12.4435	12.5813	12.2718	12.1776	12.3586	11.4955	11.3352	11.4253	10.6542	10.619	10.6548	9.34993	8.97117	9.43077
ENSG00000021852	9.94118	10.1079	10.1113	10.0284	10.2532	10.3124	9.82913	10.2062	10.014	9.95102	9.88516	9.97719	9.87316	9.99656	10.0934	9.89642	9.74607	9.79561	9.59612	9.6047	9.65714
ENSG00000022267	1.80823	1.85184	3.08186	3.3174	2.55049	1.10775	1.6992	1.97681	3.05467	2.44311	2.84444	2.28829	1.84122	1.05418	3.25546	3.15928	3.31987	2.35221	4.28019	4.25279	4.01926
ENSG00000022277	10.6494	10.6243	10.6795	10.5166	10.7305	10.6765	10.3842	10.8176	10.4638	10.527	10.5983	10.5126	10.4171	10.49	10.6342	10.488	10.3532	10.5039	10.3954	10.4988	10.5036
ENSG00000022567	8.88845	9.18074	9.08972	9.01457	9.0247	8.99547	8.83427	8.9145	9.0052	8.98569	8.97441	9.03953	8.89832	9.02804	8.96501	8.83249	8.86612	8.83534	9.00195	9.03127	8.90906
ENSG00000022840	12.1077	12.144	12.1847	12.109	12.1341	12.1589	12.1433	12.1882	12.1519	12.0975	12.2198	12.1031	12.1513	12.2282	12.1948	12.2842	12.2556	12.2219	12.4541	12.426	12.3223
ENSG00000022976	8.1611	8.18968	8.05572	7.85297	7.98659	7.92133	7.69345	7.87601	7.67549	8.21228	8.05311	8.00784	8.11131	8.0308	8.00305	7.81321	8.02664	7.63599	7.27558	7.5562	7.35659
ENSG00000023041	9.52234	9.47597	9.59125	9.63341	9.54683	9.67126	9.60739	9.62546	9.52507	9.50949	9.42205	9.5266	9.55756	9.47476	9.4259	9.63689	9.5712	9.55695	9.76201	9.80602	9.8274
ENSG00000023171	7.35437	7.26362	7.13325	7.07182	7.71361	7.68265	7.40549	7.02451	7.27136	7.20416	7.1618	7.33139	6.60639	6.98818	6.45034	6.32802	6.49251	6.12891	7.37315	7.36105	7.11718
ENSG00000023191	11.3763	11.3203	11.1796	11.2226	11.3096	11.132	11.1767	11.3478	11.3007	11.2295	11.181	11.1379	11.2736	11.2987	11.5291	11.56	11.4806	11.5034	11.6977	11.6753	11.5513
ENSG00000023228	11.49	11.5617	11.6436	11.6692	11.6556	11.6842	11.7098	11.5635	11.585	11.6182	11.5705	11.6847	11.6967	11.7002	11.4352	11.4185	11.5451	11.4241	11.4428	11.3939	11.4454
ENSG00000023287	11.1495	11.0875	11.2623	11.1574	11.249	11.2317	11.0672	11.0905	11.015	11.4602	11.3374	11.4042	11.6179	11.6042	11.4243	11.6597	11.6519	11.6028	12.2432	12.2602	12.1854
ENSG00000023318	11.1068	11.1318	11.208	11.2381	11.236	11.3106	11.2424	11.2745	11.1885	11.0581	11.0931	11.1493	11.028	10.9432	11.0384	11.0386	11.0504	10.9663	10.9635	11.0104	10.9732
ENSG00000023330	12.7006	12.8918	12.7662	12.7584	12.9134	12.8539	12.6168	12.8625	12.7482	12.6932	12.7635	12.7019	12.7914	12.7521	12.9048	12.7848	12.6677	12.722	12.3001	12.21	12.2613
ENSG00000023445	9.04357	8.86267	9.10936	8.99216	9.08724	8.91145	8.91931	8.98864	8.98105	8.99576	8.89795	9.1502	8.65809	8.43701	8.56638	8.15854	8.47714	8.50444	8.33529	8.50749	8.53386
ENSG00000023516	10.2462	10.3157	10.5309	10.4118	10.3557	10.2966	10.4653	10.2146	10.3799	10.5586	10.4391	10.5019	10.476	10.5189	10.2355	10.3051	10.5979	10.3113	10.4372	10.4632	10.4166
ENSG00000023572	8.671	8.7535	8.86172	8.86534	8.79546	8.70333	8.89682	8.9406	8.88396	8.65498	8.66291	8.83137	9.06993	8.96727	9.04243	9.39199	9.34524	9.38864	9.78347	9.84132	9.73799
ENSG00000023608	6.99274	6.40101	6.61577	6.53418	6.73699	6.92041	6.60926	6.64173	6.83655	6.42387	6.45206	6.72641	6.94565	6.91285	6.66813	6.79691	6.7441	6.74061	6.9859	7.53719	7.12645
ENSG00000023697	10.4991	10.5808	10.6248	10.7967	10.6488	10.6331	10.7539	10.7772	10.843	10.4908	10.5809	10.6564	10.5949	10.4506	10.6394	10.6645	10.5413	10.6854	10.4529	10.4873	10.4279
ENSG00000023734	11.5585	11.4233	11.5687	11.6487	11.5841	11.6179	11.6527	11.731	11.782	11.5054	11.557	11.6838	11.5851	11.5581	11.6704	11.6796	11.7227	11.7887	11.8855	11.8584	11.9321
ENSG00000023839	11.685	11.7593	11.7407	11.8203	11.7807	11.8675	11.9716	11.9203	11.9003	12.166	12.0817	12.0831	12.869	12.9949	12.7541	13.3229	13.3443	13.1779	13.555	13.3839	13.5247
ENSG00000023892	6.54811	6.13247	6.28836	6.16496	6.44684	5.98584	6.24616	6.4929	6.3031	6.32191	6.13424	5.45064	5.31277	5.98731	5.78524	5.62891	5.49544	5.80791	4.57083	4.18927	4.65335
ENSG00000023902	8.55101	8.03321	8.06916	8.11393	7.94454	7.82173	8.07236	8.34847	8.31162	8.6926	8.67169	8.78384	9.05599	8.96727	9.11095	10.041	9.92037	9.93284	11.52	11.8285	11.4897
ENSG00000023909	10.8208	10.6987	10.8719	11.0062	10.8681	10.9367	11.2258	11.1333	11.2101	11.229	11.2227	11.2812	12.0229	12.0815	11.9295	12.614	12.7477	12.5007	13.4294	13.3616	13.2487
ENSG00000024048	10.4573	10.6609	10.5973	10.5553	10.6246	10.7127	10.5728	10.5217	10.5548	10.6571	10.6503	10.6716	10.66	10.7302	10.5444	10.5996	10.6258	10.4524	10.6449	10.6729	10.6296
ENSG00000024422	6.31863	6.8229	6.59735	6.28043	6.54393	6.74508	6.30202	6.4123	6.6034	6.42982	6.71234	6.36773	6.74023	6.80586	6.86908	7.23708	7.15301	6.88794	8.76727	9.08023	8.35218
ENSG00000024526	5.31408	4.61391	4.94805	5.6955	4.51491	5.24652	5.79914	5.17929	6.13823	5.58629	5.29756	5.70816	5.31277	3.90642	4.83537	5.10846	4.76237	4.93375	4.35852	4.05318	4.49058
ENSG00000024862	8.75277	8.62112	8.77421	8.95787	8.93087	8.8259	8.92377	8.76023	8.90976	8.55638	8.76895	8.65907	8.48862	8.55733	8.54453	8.41105	8.37434	8.50444	8.14949	8.07852	8.21116
ENSG00000025039	9.15541	8.86671	9.26629	9.32813	9.10644	8.99547	9.33361	9.26825	9.22082	9.20117	9.20951	9.28388	9.3467	9.40545	9.38549	9.77394	9.84036	9.71614	10.4053	10.5312	10.2495
ENSG00000025156	7.84515	7.92118	8.06246	8.02841	8.08021	7.90752	8.10413	8.08805	8.00458	8.11863	8.06648	8.15273	8.17716	7.96395	8.02426	8.13159	8.07551	8.14301	8.46045	8.2787	8.3679
ENSG00000025293	9.03327	8.88275	8.97666	8.84047	9.05795	8.92865	8.94585	8.86084	9.0323	9.19462	9.10972	9.06904	9.19389	8.98577	8.92045	9.23834	9.23417	9.02239	9.48265	9.48417	9.54753
ENSG00000025423	7.00685	7.48991	7.42205	7.49484	7.71361	7.77685	7.10151	6.98046	6.85184	6.8738	7.01782	6.98717	6.34122	5.65881	6.24883	5.95014	5.23879	5.90995	4.50347	4.5844	3.8505
ENSG00000025434	10.5214	10.719	10.5786	10.579	10.6499	10.5399	10.443	10.6228	10.5536	10.326	10.5166	10.3227	10.2283	10.29	10.4189	10.217	10.0835	10.1999	9.4584	9.41471	9.5126
ENSG00000025708	7.31002	7.03139	7.03605	6.81161	7.47298	7.26466	7.32279	7.38737	7.18944	7.26146	7.14602	7.05162	7.42867	7.56197	7.58311	7.85297	7.63043	7.82424	8.35309	8.66241	8.47328
ENSG00000025770	9.46475	9.53044	9.31221	9.39372	9.45993	9.2898	9.15935	9.51978	9.25861	9.38094	9.51519	9.38122	9.38993	9.29606	9.63512	9.39199	9.31225	9.39745	9.19577	9.47254	9.3559
ENSG00000025772	10.37	10.2722	10.4054	10.3437	10.3396	10.3702	10.2046	10.4325	10.243	10.1879	10.3158	10.1519	10.0651	10.1562	10.2389	10.1536	10.174	10.1765	10.3356	10.3204	10.1976
ENSG00000025796	11.6989	11.7383	11.8044	11.6041	11.8528	11.8547	11.6269	11.6881	11.633	11.7997	11.7086	11.7679	11.7073	11.6152	11.6381	11.5903	11.5421	11.5596	11.689	11.6308	11.7095
ENSG00000025800	11.056	11.1183	11.1412	11.0813	11.1491	11.1766	11.2204	11.0585	11.1061	11.1267	11.1104	11.1513	11.0592	11.103	11.0081	11.0892	11.1276	11.0157	11.1913	11.1389	11.1528
ENSG00000026025	13.5504	12.8709	13.0578	12.8856	12.8644	12.7391	12.875	13.1944	13.0936	13.3566	13.2325	13.4504	13.4633	13.4591	13.5412	14.0928	14.0739	14.127	15.1091	15.2616	15.0725
ENSG00000026036	8.04398	8.33428	7.92545	7.81848	7.85927	8.01121	7.68134	7.46822	7.8323	8.05022	8.34297	7.69766	8.11834	8.12655	7.91754	7.87134	7.97497	7.48201	8.08414	7.48822	7.63469
ENSG00000026103	9.08404	8.76653	8.84229	8.95208	8.71851	8.84415	8.74641	9.00523	8.88767	8.82556	8.83684	8.9697	8.96446	8.70606	8.96775	8.72539	8.73397	8.93553	8.55496	8.5365	8.76513
ENSG00000026297	10.8149	10.9791	10.7952	10.8178	10.9296	10.8798	10.8261	10.9944	10.9472	10.5405	10.785	10.5758	10.675	10.6515	10.8215	10.7069	10.5652	10.6991	10.1885	10.1362	10.2336
ENSG00000026508	10.3957	9.93028	10.1576	10.0956	10.0149	9.91686	10.2743	10.3353	10.2632	10.5415	10.497	10.6619	11.3379	11.5478	11.2513	12.105	12.1502	11.9697	12.9054	13.0253	12.811
ENSG00000026559	3.75603	3.8123	2.57968	3.16545	3.05093	2.49067	1.99866	3.1424	3.05467	1.87298	3.2713	1.7359	2.62439	2.40767	2.52352	4.07619	4.11585	3.82165	5.89582	6.27355	5.4872
ENSG00000026652	8.83807	8.80492	8.63662	8.63883	8.7796	8.81484	8.50601	8.61293	8.54596	8.89445	8.74835	8.68381	8.74462	9.10902	8.69431	8.87374	9.0216	8.76899	9.19043	9.17959	9.21526
ENSG00000026950	9.1163	9.13443	8.90614	9.08151	9.25379	9.10811	9.05758	9.05354	9.06058	8.9112	9.0316	8.90502	8.63659	8.45225	8.57805	7.79997	7.74446	8.04647	6.89893	6.64444	6.77362
ENSG00000027001	8.23485	7.93663	8.29174	8.27575	8.32934	8.2016	8.21739	8.30001	8.26668	8.22089	8.33305	8.15667	8.26862	7.91973	8.3608	8.35	8.12701	8.37125	8.13843	8.02949	8.18921
ENSG00000027075	6.72914	6.60815	6.57868	6.62437	6.50587	6.50934	6.55282	6.34441	6.72468	6.5846	6.3896	6.59344	6.41586	6.17097	6.4966	6.26326	6.0697	6.40538	6.65445	6.41908	6.36537
ENSG00000027697	10.9578	10.9228	11.0828	11.1953	11.1336	11.1585	11.204	11.1736	11.2322	11.0216	11.0609	11.1959	11.1792	11.095	11.1482	11.1834	11.226	11.2361	11.4729	11.5162	11.4399
ENSG00000027847	9.55869	9.50735	9.33463	9.47677	9.50644	9.41957	9.38462	9.48276	9.56274	9.38286	9.30284	9.34892	9.40284	9.38004	9.55722	9.50833	9.3986	9.44412	9.38075	9.51039	9.34601
ENSG00000028116	8.79808	8.43241	8.65456	8.55722	8.79546	8.84777	8.71074	8.74385	8.61482	8.89445	8.73586	8.81404	9.07454	9.03694	8.98408	9.19559	9.30482	9.267	9.59612	9.59094	9.52141
ENSG00000028137	5.70857	6.70154	5.95376	5.97233	6.44684	6.61512	5.96403	6.30923	5.98017	6.59788	6.47229	6.31238	6.44467	6.21345	5.97149	5.82112	5.97919	6.07721	5.11299	5.44946	5.05399
ENSG00000028203	10.5445	10.4265	10.5442	10.3292	10.4211	10.5207	10.4116	10.5062	10.3666	10.5501	10.4896	10.5794	10.5156	10.5739	10.4806	10.6777	10.7363	10.6673	11.0052	11.0264	10.9725
ENSG00000028277	4.00115	3.94044	3.99405	2.9956	3.71653	3.35625	3.32032	3.29405	2.82595	4.22901	4.53954	4.11404	3.79863	4.00644	4.45281	3.41912	3.6365	3.54545	4.0159	4.67992	4.17033
ENSG00000028310	9.48093	9.41344	9.31503	9.06367	9.31427	9.29655	9.10018	9.29345	9.2902	9.62309	9.68945	9.46038	9.78179	9.69338	9.61817	9.75727	9.73962	9.6493	9.95239	9.90302	9.86505
ENSG00000028528	11.0501	11.091	11.1268	11.0421	11.1305	11.1193	10.9692	10.9746	11.0125	10.9974	10.8806	10.9625	10.8232	10.8223	10.7589	10.6264	10.6295	10.6123	10.464	10.5207	10.5663
ENSG00000028839	8.02913	7.66707	8.1661	8.31691	8.04083	8.00155	8.11196	8.17367	7.96293	8.12323	8.10587	7.91336	8.11579	8.14494	8.2254	8.51205	8.33108	8.44449	9.07046	9.07804	9.03008
ENSG00000029153	7.511	7.25132	7.29061	7.17491	7.12373	7.19517	7.44324	7.17866	7.46283	7.54314	7.42316	7.74593	8.00893	8.23016	7.52625	7.97359	8.15208	7.88183	8.86107	8.81423	8.71991
ENSG00000029363	11.4507	11.3042	11.4227	11.3903	11.3756	11.4979	11.4232	11.4181	11.3447	11.5634	11.4702	11.6097	11.5218	11.4988	11.4303	11.3531	11.439	11.4654	11.6221	11.607	11.6864
ENSG00000029364	11.1669	11.2853	11.462	11.5023	11.2683	11.3797	11.5638	11.3299	11.4744	11.2591	11.2898	11.3942	11.2711	11.2142	11.2428	11.1065	11.2309	11.1718	11.1812	11.1378	11.1015
ENSG00000029534	6.42748	6.26075	6.28836	5.99504	6.03062	6.24947	5.63487	6.23619	5.98017	6.45923	5.91527	6.34032	5.93718	5.80487	5.73466	5.43675	5.54676	5.67508	5.69912	5.44946	5.23631
ENSG00000029639	8.63072	8.70326	8.73871	8.9469	8.86614	8.81625	8.84432	8.97066	8.83203	8.64401	8.67287	8.9129	8.94745	8.72472	8.80994	8.94036	8.95351	9.0046	8.7109	8.74559	8.75132
ENSG00000029725	10.5541	10.61	10.5236	10.5543	10.592	10.6937	10.4476	10.5828	10.5037	10.6697	10.629	10.6771	10.6639	10.6932	10.5581	10.687	10.6295	10.6687	11.0383	11.0826	10.9302
ENSG00000029993	9.1427	8.94136	8.98022	8.93749	8.81893	8.91835	8.98903	9.12892	8.98449	9.19025	9.08694	9.16394	9.25616	9.45055	9.2525	9.7431	9.77729	9.58961	10.1262	10.2157	10.1755
ENSG00000030066	10.3563	10.3098	10.4433	10.6289	10.2675	10.389	10.6373	10.3177	10.5883	10.4027	10.4262	10.4627	10.438	10.454	10.2536	10.4153	10.5254	10.4465	10.382	10.4437	10.3792
ENSG00000030110	9.37966	9.14321	9.18463	9.46649	9.24455	9.16577	9.37272	9.40982	9.29781	9.42391	9.51984	9.31693	9.37265	9.54898	9.51431	9.64466	9.61332	9.69033	10.0347	10.2505	10.0351
ENSG00000030419	6.20089	5.93123	6.31115	6.22385	5.66669	5.93227	5.7598	5.9237	5.98017	6.15223	5.94453	6.32642	5.93718	5.77682	5.80988	4.99339	5.71326	5.84959	4.63518	4.63295	4.70377
ENSG00000030582	12.3763	12.4417	12.3183	12.1968	12.2605	12.1585	12.1405	12.2926	12.2976	12.2061	12.3219	12.1573	12.0676	12.0544	12.2909	12.1883	12.1285	12.1692	12.2672	12.3848	12.1898
ENSG00000031003	9.67586	9.56316	9.65053	9.68322	9.42211	9.61924	9.54221	9.69354	9.43907	9.75154	9.78155	9.6711	9.79561	9.76628	9.63685	9.80555	9.88964	9.68337	10.2725	10.3167	10.1676
ENSG00000031081	4.63054	5.37326	5.35136	4.31715	4.72826	4.72313	4.5982	4.72504	4.59366	5.50403	4.53954	4.64879	4.92007	5.00988	5.0574	5.18037	5.00188	5.04559	5.8423	6.36262	6.01224
ENSG00000031691	6.48906	6.64624	6.91257	6.72293	6.70375	6.66524	6.70559	6.64173	6.72468	6.8518	6.74597	6.96939	6.44467	6.37186	6.48135	6.21272	6.3838	6.33374	6.0454	6.27355	5.77347
ENSG00000031698	12.3902	12.3582	12.3507	12.3081	12.3774	12.3625	12.2101	12.525	12.346	12.4487	12.4676	12.4473	12.6006	12.5594	12.6419	12.9161	12.8317	12.8969	13.3441	13.3824	13.2514
ENSG00000031823	10.5577	10.561	10.3948	10.2594	10.4223	10.2467	10.2524	10.4538	10.2646	10.3634	10.4262	10.2637	10.3598	10.4484	10.5993	10.5299	10.5182	10.4182	10.5676	10.6022	10.568
ENSG00000032219	9.31977	9.44119	9.35122	9.2711	9.33254	9.47448	9.30996	9.26825	9.04899	9.58812	9.54654	9.52508	9.19176	9.26105	8.96227	8.71634	8.76951	8.85082	8.43807	8.51075	8.65732
ENSG00000032389	8.88463	8.80912	8.72838	8.96939	8.86851	8.81114	8.68996	8.9057	8.70181	8.75024	8.83684	8.6646	8.74172	8.88096	8.97322	8.82129	8.83807	8.8913	8.87779	8.88108	8.70451
ENSG00000032444	10.7972	10.7962	10.5942	10.4265	10.6553	10.5665	10.3443	10.6642	10.4939	10.6913	10.7489	10.6227	10.6195	10.6352	10.6256	10.628	10.512	10.4921	10.582	10.5312	10.5102
ENSG00000032742	8.53163	8.3013	8.48953	8.37869	8.42931	8.34175	8.28131	8.43669	8.11646	8.30427	8.27088	8.40834	8.4141	8.56555	8.40998	8.54306	8.48703	8.48142	8.4737	8.45107	8.40266
ENSG00000033011	9.77678	9.73202	9.67488	9.85171	9.69673	9.68317	9.83386	9.85737	9.87117	9.66067	9.83526	9.77989	9.60216	9.72604	9.80698	9.75485	9.7597	9.79559	9.63794	9.60013	9.63454
ENSG00000033030	9.46475	9.39161	9.3649	9.27806	9.29119	9.37258	9.21859	9.31556	9.14524	9.41885	9.47314	9.52964	9.46919	9.40087	9.42789	9.42382	9.36325	9.33278	9.58598	9.49406	9.52141
ENSG00000033050	9.22954	9.14175	8.97316	9.10449	8.88706	9.00686	9.04826	9.0947	9.07779	9.28987	9.27593	9.15924	9.60617	9.42531	9.39633	9.70415	9.68826	9.65276	9.8662	9.94674	9.75162
ENSG00000033100	10.5791	10.7089	10.6893	10.6069	10.6779	10.5577	10.7683	10.7569	10.7244	10.7552	10.7552	10.7485	10.7779	10.8197	10.9316	10.9063	10.9616	10.8714	11.2832	11.3779	11.3248
ENSG00000033122	2.85904	3.34108	2.24292	0.997485	3.05093	3.18359	1.99866	2.29718	3.25204	2.44311	3.2713	2.68677	4.37878	3.26489	2.93542	2.65288	3.06212	2.56737	1.66366	1.40173	1.48027
ENSG00000033170	7.57865	7.4794	7.59917	7.42962	7.59173	7.53772	7.39269	7.64157	7.49241	7.69917	7.30405	7.47061	7.54678	7.31517	7.50378	7.67068	7.84379	7.92635	8.20884	8.37818	8.15791
ENSG00000033178	10.2417	10.3891	10.3747	10.4472	10.2998	10.2218	10.4461	10.4099	10.4469	10.4511	10.3841	10.5676	10.5241	10.5606	10.4378	10.6077	10.8031	10.6475	11.0959	11.1059	11.0604
ENSG00000033327	9.0538	9.08346	9.04623	8.71949	8.81504	8.87287	8.62848	8.89979	8.71859	9.22704	9.22151	9.1203	9.3275	9.56364	9.39162	9.88302	9.8734	9.6718	10.7135	10.916	10.6066
ENSG00000033627	11.7942	11.9122	11.892	11.8924	11.87	11.8759	11.9496	11.8086	11.8841	11.8776	11.8722	11.8812	11.9802	12.0046	12.0004	12.0852	12.0866	11.9632	12.1946	12.1367	12.0649
ENSG00000033800	9.87736	9.91281	10.1258	10.1204	9.93478	9.85703	9.94	9.7339	10.0072	9.90501	9.7856	9.90303	9.75449	9.71915	9.67758	9.6512	9.71555	9.48768	9.62017	9.62734	9.50551
ENSG00000033867	8.52185	8.34827	8.43869	8.57241	8.32388	8.14974	8.65285	8.42029	8.68909	8.85074	8.59534	8.84849	9.14206	9.26105	8.90051	9.65436	9.83778	9.60033	10.5521	10.5045	10.4241
ENSG00000034053	7.54038	7.6946	7.43248	7.45443	7.17313	7.41615	7.20768	7.45298	7.46283	7.80603	7.83609	7.62622	8.02333	8.13944	7.74646	8.42961	8.32742	8.28271	8.67844	8.73304	8.58519
ENSG00000034152	10.6347	10.5231	10.6042	10.5156	10.6422	10.561	10.5806	10.6308	10.6574	10.6626	10.8207	10.5126	10.7608	10.679	10.8329	10.7085	10.6978	10.7068	10.7594	10.8623	10.7432
ENSG00000034239	1.80823	2.29702	3.08186	2.9956	4.17025	2.76032	2.64235	3.29405	4.26847	3.92619	2.84444	2.99866	3.50239	2.40767	3.73872	2.17828	3.06212	2.92024	2.90777	2.5672	2.6713
ENSG00000034510	14.342	14.1115	14.1515	14.254	14.1571	14.1433	14.1265	14.3897	14.4458	13.9138	14.0043	14.0217	14.0285	13.9658	14.2653	14.3916	14.3139	14.5873	14.3836	14.5473	14.5427
ENSG00000034533	7.69645	7.31181	7.58988	7.68149	7.87159	7.962	7.55664	7.68339	7.53094	7.49426	7.64435	7.69274	7.53343	7.43669	7.32728	7.38136	7.16127	7.21741	6.50748	7.06628	6.96012
ENSG00000034677	10.6106	10.4347	10.5076	10.4451	10.5749	10.532	10.5412	10.5474	10.4544	10.6339	10.5069	10.7249	10.7128	10.7484	10.6107	10.8667	10.892	10.8271	11.3087	11.2588	11.2398
ENSG00000034693	8.76112	8.59702	8.8226	8.84966	8.92728	8.6253	8.9326	8.79561	9.02557	8.69254	8.77702	8.76837	8.66729	8.52813	8.81482	8.68875	8.68613	8.83793	8.45154	8.5301	8.42157
ENSG00000034713	10.4249	10.3793	10.5015	10.5195	10.5055	10.5421	10.6488	10.5901	10.7181	10.3089	10.3059	10.5218	10.2427	10.3231	10.3585	10.3349	10.4054	10.5552	10.7385	10.7986	10.7884
ENSG00000035115	10.7291	10.7089	10.5996	10.7135	10.6179	10.657	10.7751	10.6712	10.6639	10.6977	10.6799	10.7485	10.6745	10.7155	10.6342	10.6511	10.6878	10.5599	10.7521	10.6227	10.6737
ENSG00000035141	10.6683	10.7301	10.7697	10.7075	10.7711	10.7577	10.6788	10.7908	10.7693	10.6483	10.6514	10.7763	10.7765	10.7574	10.7683	10.7107	10.7105	10.7773	10.6292	10.6129	10.6514
ENSG00000035403	12.4362	12.2107	12.2981	12.225	12.1737	12.1927	12.206	12.3576	12.3331	12.5259	12.4767	12.5537	12.7025	12.6598	12.6094	12.8519	12.8692	12.8152	13.3503	13.3874	13.3132
ENSG00000035499	5.9899	5.07125	4.94805	5.77642	4.97106	5.66303	5.89306	5.77691	5.77081	5.78516	5.38553	5.90806	5.51646	5.59598	5.83411	5.62891	5.59633	5.92952	5.75811	5.8077	5.74967
ENSG00000035664	8.1861	7.65778	7.70621	7.68149	7.56422	7.26184	7.52178	7.50054	7.54982	7.90552	7.66207	7.88044	7.62437	7.69084	7.44992	7.65814	7.97136	7.62403	7.97399	8.04303	8.14428
ENSG00000035681	9.06732	9.00503	9.04623	9.0034	9.05136	9.1175	9.07369	9.05651	8.92431	9.11603	9.26275	9.07529	9.13545	9.18837	9.10847	9.13355	9.20252	9.16336	9.47388	9.47421	9.28936
ENSG00000035687	9.62648	9.40555	9.64382	9.57429	9.43483	9.45799	9.62666	9.68671	9.7621	9.71391	9.60955	9.58761	9.70326	9.72466	9.61254	9.87356	9.9228	9.89352	10.3631	10.4154	10.1866
ENSG00000035862	10.867	10.913	11.0159	10.7845	10.8185	10.7295	10.8038	10.9697	10.8937	11.0222	10.9589	10.8822	10.979	10.9558	10.8722	11.4578	11.5495	11.3325	12.6547	12.8686	12.5109
ENSG00000035928	10.8679	10.9525	10.9647	10.7582	10.9937	11.089	10.6755	10.8003	10.7097	10.9836	10.9508	10.9975	10.8604	10.6979	10.7382	10.5639	10.4641	10.5833	10.754	10.7629	10.7678
ENSG00000036054	9.49007	9.61689	9.68366	9.69368	9.64639	9.66921	9.78203	9.61289	9.77821	9.72303	9.68949	9.80994	9.64704	9.64155	9.5967	9.61435	9.62741	9.53156	9.77457	9.82965	9.77383
ENSG00000036257	10.6221	10.561	10.6395	10.6124	10.7407	10.6034	10.6099	10.6476	10.6109	10.7252	10.7207	10.7827	10.7529	10.6847	10.7057	10.8125	10.7098	10.7139	10.9133	10.9179	10.9222
ENSG00000036448	5.26798	5.41798	5.05993	4.94932	4.51491	4.78488	4.98695	4.3628	4.17427	5.04241	4.93898	5.50101	4.99989	5.23276	4.97264	4.52597	3.97306	3.64351	2.41586	4.18927	4.17033
ENSG00000036473	10.1025	10.4536	10.4291	10.44	10.5999	10.6519	10.4553	10.6397	10.4086	10.1422	10.2307	10.433	9.95303	9.85448	10.0227	9.3882	9.23025	9.51222	8.26585	7.5308	8.17141
ENSG00000036530	6.15096	6.30904	6.5212	6.26182	6.68684	6.35503	6.08039	6.55428	5.73826	6.38456	6.30189	6.06698	5.78779	5.56351	5.59986	5.24886	4.88709	5.4223	4.35852	3.64332	4.65335
ENSG00000036549	10.0575	9.95704	10.0768	10.1281	10.1598	10.1162	10.0129	9.98722	10.1424	10.0725	9.96229	10.1705	10.1615	10.0356	9.96905	10.0674	10.1104	10.1095	10.2118	10.1804	10.162
ENSG00000036672	7.56918	6.96528	7.49353	7.40439	7.40792	7.33591	7.14033	7.43678	7.20143	7.36039	7.34851	7.28183	7.30113	7.42769	7.31872	7.55371	7.36087	7.35403	7.66279	7.49184	7.49901
ENSG00000037042	8.68348	8.7535	8.72626	8.75909	8.69444	8.61241	8.71324	8.59602	8.62019	8.8308	8.70246	8.45333	8.66842	8.56366	8.74738	8.56116	8.46054	8.42773	7.90546	7.98745	8.09838
ENSG00000037241	9.27182	9.19972	9.01301	9.25817	9.15747	9.24489	9.2696	9.36168	9.35093	8.80166	9.02113	8.98403	8.95483	8.79409	9.14209	8.91202	8.91487	9.04531	8.58749	8.65373	8.6042
ENSG00000037474	10.3411	10.3989	10.249	10.1946	10.2546	10.3045	10.1429	10.3752	10.1958	10.4511	10.3894	10.3675	10.6132	10.5441	10.4758	10.7687	10.7293	10.7047	11.1115	11.0821	11.1237
ENSG00000037637	9.58243	9.50994	9.66166	9.62433	9.45494	9.48149	9.59067	9.62724	9.55809	9.6627	9.69811	9.68886	9.66551	9.8308	9.71067	10.0253	10.0236	9.89228	10.4293	10.3927	10.2747
ENSG00000037749	8.87313	8.76653	9.08642	9.07179	8.7716	8.93207	8.96976	8.72061	9.07203	8.80853	8.91652	9.13433	8.99643	9.10339	8.63694	8.84083	9.04187	8.86867	9.19043	9.19988	9.17562
ENSG00000037757	9.37246	9.55317	9.44693	9.42333	9.49191	9.29777	9.57659	9.28871	9.51069	9.36743	9.43757	9.41609	9.54431	9.57387	9.46521	9.44951	9.48172	9.26122	9.23264	9.30849	9.24961
ENSG00000037897	7.29814	7.3812	7.1204	7.26179	7.55493	7.48288	7.38624	7.05669	7.32714	7.32089	7.28129	7.2155	7.69801	7.84064	7.93747	8.19805	8.09288	8.22844	8.4737	8.45782	8.44773
ENSG00000038002	9.4622	9.50217	9.55829	9.57806	9.50644	9.47214	9.33025	9.62724	9.40837	9.39051	9.35281	9.46132	9.33329	9.34464	9.38549	9.5205	9.34524	9.36727	9.32819	9.45914	9.44936
ENSG00000038210	10.1462	10.1483	10.2327	10.3225	10.2431	10.4534	10.4858	10.2785	10.3438	10.325	10.3311	10.3751	10.3408	10.3182	10.258	10.301	10.3405	10.2416	10.3112	10.2137	10.2579
ENSG00000038219	9.88693	9.99073	9.86979	9.56483	9.893	9.91514	9.47243	9.53128	9.42891	10.1331	9.98535	9.9559	10.0263	10.1397	9.79485	9.95782	9.88964	9.9292	10.2863	10.3731	10.3705
ENSG00000038274	10.293	10.3275	10.499	10.4358	10.4639	10.4112	10.402	10.5398	10.3613	10.3989	10.4092	10.4808	10.4425	10.2912	10.3782	10.4032	10.4235	10.49	10.3643	10.2589	10.2558
ENSG00000038358	10.7972	10.9307	10.7787	10.6942	10.7517	10.7602	10.6547	10.8317	10.8253	10.7952	10.8379	10.7731	10.7291	10.8373	10.8767	10.8812	10.825	10.8044	10.7761	10.8558	10.7612
ENSG00000038382	11.4898	11.304	11.2291	11.1332	11.2199	11.2468	11.0887	11.0983	11.1063	11.6558	11.5125	11.4669	11.6592	11.7366	11.5434	11.8388	11.8873	11.761	12.4638	12.5408	12.4598
ENSG00000038427	11.2254	10.4973	10.8092	10.6261	10.29	10.4534	10.6886	10.6746	10.8071	11.3937	11.0676	11.3434	11.0679	11.062	10.9738	11.4844	11.5928	11.64	12.4817	12.5137	12.688
ENSG00000038532	9.77396	9.7778	9.70533	9.47677	9.67668	9.60004	9.55807	9.60021	9.57892	9.85611	9.79366	9.71577	9.69579	9.81364	9.71394	9.74459	9.62443	9.62605	10.0545	10.0151	9.9694
ENSG00000038945	5.12014	5.23015	4.76207	5.48693	4.91408	5.20194	5.44946	5.46154	5.56347	4.92085	5.62122	5.25904	5.62112	5.35163	5.2133	4.41111	4.76237	4.18947	4.19736	3.82146	3.3147
ENSG00000039068	12.5067	12.6703	12.7548	12.7276	12.6622	12.7205	12.7536	12.6903	12.731	12.6839	12.7142	12.7066	12.725	12.869	12.7677	12.7846	12.8635	12.6889	12.7653	12.6892	12.6978
ENSG00000039123	10.207	10.2737	10.3363	10.3158	10.3328	10.3665	10.3827	10.3177	10.2589	10.328	10.2616	10.3323	10.2832	10.2227	10.1775	10.1625	10.175	10.262	10.2288	10.0909	10.2151
ENSG00000039139	7.511	7.35844	7.44284	6.9492	7.17313	7.52873	7.03714	7.30904	7.29393	7.84554	7.68825	7.63188	8.14242	8.21456	7.59166	7.86867	8.01302	8.03423	8.08759	7.91145	7.92274
ENSG00000039319	10.173	10.2116	10.3733	10.4244	10.2286	10.3384	10.4258	10.2288	10.2574	10.3856	10.3144	10.4941	10.3408	10.3906	10.1704	10.0944	10.3102	10.2079	10.2405	10.2374	10.2758
ENSG00000039523	10.8699	10.8255	10.6784	10.5097	10.5852	10.5654	10.4234	10.6281	10.586	10.9162	10.8957	10.7966	10.9833	10.9943	11.0293	11.3823	11.3331	11.2468	12.2694	12.3759	12.0586
ENSG00000039537	11.8924	12.1214	12.0845	12.0274	12.2141	12.2517	11.8579	12.1711	12.0269	11.8827	11.8953	12.0012	11.7572	11.7174	11.9032	11.5212	11.4131	11.4472	10.9845	10.8366	10.9222
ENSG00000039560	10.2668	10.3245	10.3265	10.1139	10.202	10.2092	9.95749	10.2613	10.0276	10.2794	10.2173	10.289	10.1958	10.3109	10.0319	10.2674	10.1811	10.2308	11.0037	11.1955	11.0043
ENSG00000039650	9.03671	8.9143	8.6093	8.6674	8.78358	8.70732	8.63394	8.76348	8.7393	8.87276	8.76074	8.76593	8.80697	8.77858	8.8861	9.01564	9.11383	8.91849	9.57577	9.72015	9.60834
ENSG00000040199	8.43585	8.3191	8.46433	8.26177	8.4191	8.31583	8.74389	8.38271	8.44368	8.74129	8.57209	8.70545	8.74752	8.95794	8.65745	9.0758	9.23417	9.05171	9.79055	9.75347	9.51789
ENSG00000040275	7.99416	7.86577	7.82973	7.6532	7.77889	7.92819	7.67241	7.72403	7.77513	7.9528	7.88219	7.85646	8.13801	7.90036	7.82109	8.11333	7.93329	8.05219	7.82332	8.00664	8.11664
ENSG00000040341	9.92641	9.95978	10.121	10.0584	10.0778	10.1397	10.0597	10.1977	10.0725	10.0044	10.1845	10.1771	10.0835	10.1384	10.0589	9.945	9.96059	10.0278	9.85614	9.57874	9.66033
ENSG00000040487	9.1774	9.37753	9.08972	9.06106	9.01457	9.05308	9.14796	9.25213	9.17898	9.11603	9.30284	9.1203	9.47269	9.41003	9.46327	9.90308	9.71835	9.75368	10.6517	10.7506	10.4474
ENSG00000040531	9.42066	9.14461	9.48251	9.31012	9.31889	9.02456	9.37162	9.4346	9.48639	9.34397	9.57722	9.45494	9.63615	9.71915	9.77465	9.96928	9.90324	9.94611	10.4893	10.6736	10.3841
ENSG00000040608	7.70513	7.92893	7.70621	7.6097	7.45861	7.59055	7.67241	7.92332	7.97695	7.69299	7.94868	7.6091	7.72174	7.8873	8.07088	8.24072	8.31637	8.16381	8.456	8.75514	8.43659
ENSG00000040633	10.3271	10.1762	10.0818	10.1548	10.2095	10.2385	10.0844	10.4264	10.2107	10.246	10.3693	10.2435	10.3617	10.4294	10.5554	10.7423	10.6265	10.6825	11.0301	11.0439	11.0018
ENSG00000040731	8.84593	8.46474	8.51919	8.58369	8.53229	8.48351	8.55855	8.64503	8.74341	8.40215	8.59072	8.80153	8.28464	7.97633	8.31419	7.68929	7.73736	8.10048	6.092	5.88991	6.39635
ENSG00000040933	9.07403	8.82581	8.95873	8.85916	8.8228	8.84777	8.88544	8.92616	9.02894	9.09978	8.98501	9.07737	9.04192	9.1258	8.98408	9.23834	9.26131	9.18998	9.53418	9.56145	9.42327
ENSG00000041353	5.17112	4.76001	6.09178	5.87769	4.85476	5.0593	5.99824	5.36206	5.80264	5.50403	5.54685	5.50101	5.34369	5.49628	4.97264	4.86835	5.46908	5.52878	6.82967	6.83682	6.59642
ENSG00000041357	11.3606	11.4074	11.4003	11.4993	11.4941	11.4811	11.4621	11.6106	11.5631	11.2865	11.3498	11.4178	11.3517	11.2725	11.3751	11.4448	11.4187	11.5551	11.3937	11.3636	11.4839
ENSG00000041515	6.24914	6.30904	6.24166	6.24296	5.88995	6.41484	6.32915	6.39562	6.2112	6.45923	6.66039	6.24008	6.09088	6.14925	6.11681	5.82112	5.90246	5.84959	5.01965	5.86979	5.3672
ENSG00000041802	9.69776	9.47862	9.57956	9.31239	9.51605	9.52512	9.44943	9.53699	9.26434	9.61939	9.75289	9.60066	9.79979	9.79103	9.88313	10.0827	9.83521	9.9413	10.0908	10.1358	10.0677
ENSG00000041880	6.67718	6.73727	6.91257	6.59493	6.89256	6.84993	6.51787	6.58402	6.86698	6.76026	6.77883	6.605	6.81935	6.56467	7.02454	6.63999	6.54394	6.78426	6.41886	6.30386	6.36537
ENSG00000041982	7.02081	6.85578	6.55977	6.97229	7.17313	7.13716	6.83428	6.87615	6.92598	7.46557	7.1618	7.41914	7.11652	6.77783	7.22105	6.87483	6.75505	6.81615	7.92978	8.0829	7.98012
ENSG00000041988	8.1032	8.12373	8.14723	8.0339	8.04747	8.1201	7.98548	8.15398	7.89071	7.96822	8.15676	7.83698	8.15118	8.0308	8.23453	7.79614	7.96194	8.22052	7.82332	7.75574	7.82932
ENSG00000042062	5.77599	5.58415	5.43674	5.58003	5.82961	5.78893	4.76646	5.17929	5.77081	5.41679	5.88541	5.37162	5.11189	5.31309	5.32007	4.28631	3.72828	4.72561	1.05942	2.75439	3.02857
ENSG00000042088	8.54135	8.28329	8.4795	8.39586	8.48416	8.28944	8.42343	8.68331	8.7393	8.50795	8.54847	8.62824	8.72421	8.64529	8.71402	8.86831	8.95904	8.8118	9.12471	8.97588	8.92243
ENSG00000042286	10.6221	10.5597	10.5418	10.6032	10.6683	10.5764	10.5995	10.6538	10.5826	10.6459	10.6908	10.6177	10.9821	10.9775	11.0141	11.2392	11.1921	11.1136	11.3785	11.5016	11.417
ENSG00000042317	8.08337	8.0687	7.97952	8.04483	7.9158	7.97531	7.8184	7.91164	8.07144	8.12781	8.09286	7.89464	7.80186	7.80635	7.8978	7.71372	7.57996	7.94088	7.3154	7.17684	7.41828
ENSG00000042429	9.39984	9.33889	9.57383	9.57425	9.56607	9.69431	9.7735	9.61962	9.64668	9.89146	9.37718	9.76166	9.85875	10.1621	9.84159	10.0675	10.1206	10.026	10.4724	10.5518	10.551
ENSG00000042445	11.3258	11.3444	11.4486	11.3678	11.546	11.5208	11.3486	11.5474	11.1809	11.3204	11.3525	11.2938	11.4619	11.5358	11.659	11.6419	11.4636	11.5774	11.2889	11.2166	11.408
ENSG00000042493	9.60346	9.58293	9.41046	9.56673	9.60424	9.49772	9.42919	9.66947	9.62193	9.33805	9.58885	9.43565	9.59177	9.45498	9.89613	9.87356	9.81703	9.86331	9.96186	9.9423	9.92626
ENSG00000042753	10.6267	10.5771	10.5692	10.6594	10.5737	10.6734	10.5995	10.8169	10.7714	10.2721	10.4532	10.3776	10.2179	10.2762	10.4642	10.4338	10.3505	10.4034	10.2052	10.3515	10.3548
ENSG00000042781	6.52869	6.64624	6.82026	6.77637	6.46678	6.92041	6.64209	6.19823	6.92598	6.25641	5.88541	6.65034	6.22977	6.4975	5.97149	5.3768	5.66761	5.52878	4.35852	4.25279	5.16612
ENSG00000042832	4.30495	4.61391	4.46967	4.75004	3.96115	4.52022	4.76646	4.42985	3.72046	4.74099	4.68532	4.11404	4.18752	3.90642	4.38883	4.21961	3.6365	4.18947	4.0159	4.25279	3.93735
ENSG00000042980	5.01242	3.8123	4.46967	3.80268	4.35285	4.28403	4.18813	4.3628	3.96513	4.35951	4.09372	4.35219	4.11768	3.79894	4.25167	4.07619	3.6365	4.53436	3.91583	3.32654	4.37087
ENSG00000043093	10.3686	10.4183	10.5199	10.6143	10.4312	10.4367	10.6264	10.4579	10.6098	10.5014	10.4249	10.6041	10.5054	10.3848	10.3226	10.3369	10.4608	10.3689	10.4718	10.3829	10.3956
ENSG00000043143	8.33326	8.37687	8.25106	8.01179	8.14355	8.30006	8.20279	8.17855	8.17844	8.45054	8.13154	8.22569	7.99926	7.89385	7.98152	7.62631	8.04906	8.01145	7.67049	7.89164	7.85185
ENSG00000043514	8.31638	8.23412	8.19702	8.23816	8.11855	8.27338	8.10805	8.39954	8.35521	8.25482	8.10587	8.2443	8.4642	8.18818	8.30556	8.29842	8.39199	8.39959	8.10474	7.9881	8.31212
ENSG00000044090	10.9107	10.9218	10.7881	10.7203	10.7499	10.8097	10.7036	10.7553	10.7784	10.8711	10.9776	10.7116	10.6889	10.7284	10.7762	10.5091	10.4906	10.4875	10.3972	10.382	10.3249
ENSG00000044115	13.3521	13.3992	13.3552	13.2176	13.3766	13.3566	13.1337	13.3643	13.2121	13.4987	13.4484	13.4036	13.5853	13.6113	13.5781	13.7486	13.6955	13.6871	14.0233	14.0162	13.9369
ENSG00000044446	11.3053	11.4081	11.3357	11.2769	11.2583	11.2861	11.3332	11.2694	11.1854	11.4055	11.3152	11.2262	11.3994	11.3376	11.2541	11.107	11.0926	11.1396	10.6872	10.6294	10.68
ENSG00000044459	8.67983	8.70471	8.96593	8.74652	8.85343	9.00199	8.60092	8.75697	8.56465	8.6864	8.66291	8.86781	8.63328	8.66456	8.50358	8.26573	8.26749	8.14301	8.05268	8.05644	8.09319
ENSG00000044574	14.5832	14.5218	14.552	14.4995	14.5868	14.5506	14.3522	14.5497	14.4172	14.479	14.4883	14.4853	14.0118	13.9296	14.0389	13.787	13.7004	13.8111	13.85	13.8997	13.8645
ENSG00000046604	11.2448	11.1724	11.2163	11.1592	11.0715	11.2317	11.2068	11.2002	11.2072	11.3339	11.3654	11.4112	11.5172	11.5581	11.3637	11.7712	11.9119	11.7535	12.5187	12.5651	12.3709
ENSG00000046647	9.11041	8.85862	8.96233	8.94334	8.96283	8.87642	8.75644	8.96623	9.01542	8.88636	8.96015	8.95622	8.87734	8.79965	9.09601	9.13128	9.053	9.17571	9.07046	9.0846	9.12564
ENSG00000046651	9.97564	9.78208	9.72243	9.71607	9.79974	9.86241	9.61706	9.67639	9.56042	10.0558	9.83331	9.93085	10.1408	10.1049	9.94144	10.299	10.234	10.0933	10.3161	10.4395	10.4511
ENSG00000046653	3.28651	3.34108	3.08186	3.69579	2.21529	2.15875	3.61307	3.77859	3.58056	3.1681	3.60027	2.68677	3.60804	2.08053	3.25546	2.65288	4.24577	4.18947	4.43282	4.25279	3.93735
ENSG00000046889	3.46055	4.45134	3.74901	3.45486	3.42178	3.77674	3.99832	4.0583	3.25204	3.92619	3.2713	4.35219	3.2646	3.41804	3.39227	3.99875	3.72828	4.3722	4.28019	4.5844	4.30707
ENSG00000047056	9.66701	9.63831	9.72456	9.7075	9.61991	9.6486	9.7116	9.55023	9.60623	9.68309	9.76934	9.6545	9.57721	9.56159	9.50725	9.3062	9.33433	9.24958	9.42693	9.4388	9.49123
ENSG00000047188	10.3439	10.1956	10.4689	10.562	10.4312	10.4967	10.5764	10.3527	10.4607	10.4566	10.4027	10.4995	10.4282	10.5982	10.301	10.3486	10.4549	10.2416	10.1332	9.97562	10.0809
ENSG00000047230	11.0086	10.9228	11.1538	11.0791	11.1258	11.0959	11.0737	11.0518	11.1206	11.0278	11.0576	11.0433	11.0846	11.0267	10.9745	11.0203	11.0207	10.9751	10.8169	10.8302	10.94
ENSG00000047249	9.81861	9.67331	9.85823	10.0758	9.90584	9.84801	10.0244	9.98583	9.95505	9.78531	9.76319	9.97719	9.90848	9.84438	9.84489	9.89776	9.90324	10.0648	10.115	10.1824	10.2151
ENSG00000047315	11.4018	11.3203	11.3989	11.5042	11.3856	11.5106	11.4051	11.4748	11.4312	11.4638	11.4507	11.5263	11.5291	11.5426	11.5025	11.6052	11.6107	11.5305	11.9612	11.9562	11.8696
ENSG00000047346	9.76153	9.90498	9.80504	9.85761	9.82701	9.90995	9.7906	9.57636	9.64187	9.73661	9.81955	9.79614	9.58693	9.39165	9.369	9.20855	9.27279	9.15508	9.41094	9.16522	9.29964
ENSG00000047365	8.3989	8.4859	8.27444	8.2896	8.38806	8.51118	8.43909	8.30001	8.5739	8.77384	8.60911	8.57339	8.73882	8.65303	8.50735	8.71937	8.88619	8.69945	9.3571	9.48417	9.32804
ENSG00000047410	11.3209	11.3942	11.3392	11.0871	11.4288	11.4457	11.0065	11.1421	10.9437	11.5181	11.427	11.398	11.424	11.4667	11.289	11.4296	11.2441	11.3302	11.4882	11.4492	11.5221
ENSG00000047457	12.2628	12.3054	12.2688	12.2566	12.3826	12.4416	12.1314	12.3779	12.1586	12.2588	12.2343	12.3838	12.1712	12.1441	12.231	11.9619	11.9018	11.948	11.8886	11.844	11.9225
ENSG00000047578	9.12987	9.18398	9.07315	8.89282	9.10007	8.9591	8.80557	8.92325	8.85388	9.28567	9.12577	8.98084	9.0653	9.25089	9.10599	9.12901	8.97552	8.94517	9.2222	9.30474	9.17338
ENSG00000047579	7.65228	7.29991	7.51332	7.62435	7.55493	7.60774	7.06162	7.69706	7.29393	7.60365	7.72244	7.50187	7.82396	7.75695	7.85107	8.0282	7.81267	7.8768	8.31579	8.44768	8.45511
ENSG00000047597	4.47691	4.16691	4.94805	4.6956	4.35285	4.52022	5.02064	4.55526	4.51897	4.22901	5.20387	5.00352	4.69878	5.23276	4.62931	5.14486	5.66761	4.85406	5.32292	5.14918	4.70377
ENSG00000047617	4.95539	3.8123	4.10255	3.58035	4.91408	4.65861	4.84376	4.67064	5.18296	4.42058	4.93898	4.93189	4.54764	4.00644	4.45281	4.91125	4.18227	3.9031	4.28019	4.18927	3.93735
ENSG00000047621	8.86154	8.53747	8.75771	8.9865	8.7994	8.81114	9.01433	8.9145	8.92431	8.75024	8.84073	8.9517	8.71241	8.75001	8.60913	8.71937	8.76681	8.65605	8.76367	8.54286	8.59858
ENSG00000047634	10.3549	10.4763	10.4828	10.5762	10.527	10.5796	10.6514	10.4758	10.5722	10.505	10.2674	10.5134	10.3617	10.1951	10.1656	9.97308	9.99156	9.88478	9.99443	9.75895	9.86941
ENSG00000047644	9.99523	9.78848	9.92993	9.64243	9.76794	9.81324	9.70255	9.68842	9.81184	10.1331	9.97652	10.0884	10.1441	10.2624	10.0859	10.2869	10.3414	10.1857	10.7135	10.7437	10.5924
ENSG00000047648	2.85904	2.63673	2.24292	2.58077	3.42178	2.15875	3.52193	3.43127	2.55401	3.42813	1.16121	3.57014	2.81297	3.55648	4.01787	4.52597	3.19675	4.05338	4.19736	3.32654	2.45286
ENSG00000047849	13.0079	13.0639	12.9385	12.6525	13.0024	13.0355	12.5962	12.834	12.6611	13.1043	13.0896	12.9683	13.1995	13.232	13.1354	13.3018	13.1988	13.2465	13.5058	13.4563	13.4495
ENSG00000047932	10.4676	10.4736	10.6214	10.6832	10.592	10.6045	10.767	10.6011	10.6886	10.5922	10.6646	10.7169	10.6188	10.5284	10.4189	10.4144	10.4955	10.3707	10.4145	10.4283	10.4269
ENSG00000047936	5.80856	5.96176	5.80112	5.6955	5.94787	5.87663	4.91713	5.21775	5.56347	5.50403	5.69194	5.59676	5.11189	4.8029	4.51407	4.28631	4.24577	3.9031	3.27393	3.20335	3.17872
ENSG00000048028	9.33941	9.2473	9.25752	9.39372	9.40412	9.45562	9.36836	9.31112	9.24419	9.46307	9.44014	9.33684	9.38622	9.34225	9.26814	9.30821	9.4618	9.24178	9.27869	9.08023	9.17338
ENSG00000048052	7.79726	7.59101	7.63574	7.19467	7.25571	7.54666	7.39269	7.52375	7.77513	8.03322	7.78848	8.19159	8.62071	8.2456	8.25262	9.28801	9.57429	9.42011	10.671	10.703	10.4947
ENSG00000048140	10.2328	10.1632	10.1779	10.1885	10.1916	10.1937	10.2228	10.1564	10.1346	10.2173	10.3476	10.1048	10.2304	10.3531	10.3824	10.4181	10.449	10.3085	10.6341	10.6227	10.4884
ENSG00000048162	8.55582	8.53747	8.42308	8.49881	8.54641	8.41681	8.31223	8.74055	8.4687	8.58334	8.50984	8.46654	8.94695	8.95481	9.02412	9.46759	9.27659	9.38155	9.80461	9.80072	9.90352
ENSG00000048342	8.00123	7.95192	8.25694	7.7297	7.90852	8.32105	7.91559	8.23119	7.96293	8.02832	8.05981	8.02516	8.07952	7.99472	7.93187	7.91683	7.68677	8.17205	7.83021	7.41063	7.56187
ENSG00000048392	10.9731	10.9601	11.1507	11.2441	10.9988	11.1504	11.3121	11.1625	11.3365	11.0719	11.0948	11.3571	11.0458	10.9297	10.8954	10.8876	11.0659	11.0713	10.9853	10.9295	11.015
ENSG00000048405	8.73594	8.64953	8.76598	8.90187	8.58799	8.77355	8.85308	8.76996	8.83091	8.98063	8.86006	9.01807	9.02533	9.0633	8.71402	9.02299	9.21645	8.83534	9.48919	9.61682	9.45673
ENSG00000048471	8.27035	8.35978	8.17855	8.24765	8.16202	8.43618	8.01084	8.01896	8.02497	8.34816	8.50984	8.07173	8.31226	8.36817	8.22081	8.36936	8.1808	8.10908	8.04677	8.2863	8.24561
ENSG00000048544	10.2066	10.2415	10.2312	10.2129	10.2256	10.278	10.3738	10.4366	10.4266	10.051	10.1701	10.312	10.1701	10.1657	10.1415	10.2797	10.1492	10.3093	10.2699	10.2866	10.3587
ENSG00000048649	9.78253	9.70478	9.67714	9.57621	9.79304	9.87698	9.62919	9.62127	9.57892	9.92414	9.79366	9.86146	9.88066	9.91609	9.55715	9.78469	9.72432	9.74921	10.3259	10.1617	10.1484
ENSG00000048707	10.7946	10.7145	10.7562	10.6433	10.7232	10.8097	10.6549	10.6093	10.6255	11.0284	10.939	11.0122	11.1782	11.2906	11.0247	11.3	11.3467	11.3056	11.4937	11.4175	11.5671
ENSG00000048740	8.02221	7.88978	7.78158	8.05027	7.84897	7.8509	8.25325	7.76355	8.12278	8.17288	8.13788	8.28079	8.41045	8.36817	8.18359	8.61295	8.84321	8.46475	9.43373	9.57394	9.32804
ENSG00000048828	11.992	12.1453	12.1696	12.093	12.0958	12.1164	12.0566	12.0497	11.9991	12.1184	12.1291	12.114	12.1864	12.2522	12.1366	12.1688	12.1998	12.0844	12.0097	11.9381	11.975
ENSG00000048991	9.95397	10.0416	10.0851	9.76481	10.0199	10.0965	9.84331	9.89087	9.90277	10.0081	10.0423	10.0719	10.0755	10.0561	10.0161	9.93071	9.85824	9.88478	9.85446	9.68604	9.87493
ENSG00000049089	5.22037	5.07125	5.47761	4.6956	5.17883	5.15594	4.84376	5.01434	5.23055	4.83372	4.93898	5.25904	4.5998	5.14769	5.17587	5.34586	5.14198	4.53436	5.47131	4.89425	5.39815
ENSG00000049130	8.17989	8.45404	8.56258	8.55722	8.43944	8.54726	8.77136	8.5801	8.72691	8.48669	8.60453	8.62256	8.43219	8.27096	8.36496	7.93773	7.96194	8.26357	8.42448	8.20835	8.27924
ENSG00000049167	7.69035	7.4794	7.57112	7.84674	7.50757	7.63859	7.76346	7.88799	7.73444	7.54999	7.45401	7.68219	7.81295	7.66153	7.62008	7.51946	7.36802	7.71492	7.62874	7.58116	7.64162
ENSG00000049192	7.16613	7.10857	7.02712	7.05029	6.93614	7.16064	7.36673	7.14912	7.20143	7.20416	7.32645	7.18501	6.87333	6.8999	6.59912	6.17801	6.41176	6.47362	5.20066	4.18927	5.01458
ENSG00000049239	12.4029	12.588	12.5277	12.4901	12.3886	12.4645	12.4856	12.3345	12.4883	12.5106	12.4412	12.471	12.4321	12.4743	12.2893	12.1583	12.2734	12.1277	11.7787	11.7838	11.8389
ENSG00000049245	10.7752	10.7662	10.9384	10.9651	10.8291	10.8785	11.018	10.9391	11.0294	10.8253	10.7949	10.9046	10.8402	10.8146	10.7902	10.8231	10.9025	10.8613	10.993	10.9907	10.9583
ENSG00000049246	6.64146	7.17521	7.20802	7.16493	7.2091	7.07672	7.15557	7.27297	7.0372	7.12381	7.07185	6.87705	6.9151	6.74924	6.57056	6.62718	6.68806	6.53879	6.30478	6.04147	6.09012
ENSG00000049249	8.34995	8.18968	8.24516	8.02841	7.65396	7.69074	7.98121	8.02981	8.29493	8.42841	8.27665	8.63671	8.69153	8.58185	8.59147	8.76977	8.96377	8.85338	9.46726	9.4388	9.41573
ENSG00000049323	8.33326	7.98944	8.04216	7.7297	8.06066	7.96867	8.11586	8.10866	7.8532	8.3831	8.21194	8.3817	8.46771	8.51125	8.38969	8.75218	8.82254	8.76899	9.83404	9.98383	9.82882
ENSG00000049449	11.9416	11.7146	11.8385	11.8661	11.7611	11.7295	11.9079	11.9201	11.9324	12.0661	12.0011	12.0534	12.2865	12.199	12.1692	12.5042	12.5347	12.5752	13.0315	13.0516	13.0624
ENSG00000049541	8.54619	8.68197	8.53863	8.56863	8.61952	8.71923	8.4453	8.66256	8.60583	8.57664	8.42415	8.55264	8.54956	8.52817	8.54453	8.60317	8.46385	8.5077	8.50418	8.55236	8.53037
ENSG00000049618	10.5637	10.455	10.3733	10.1074	10.3301	10.355	10.1562	10.1809	10.144	10.5509	10.5774	10.3785	10.6005	10.6619	10.4584	10.4503	10.4881	10.4667	10.5707	10.566	10.5134
ENSG00000049656	11.2823	11.2807	11.255	11.2942	11.2655	11.1636	11.292	11.3172	11.2902	11.2819	11.2581	11.2839	11.2277	11.1918	11.2636	11.3235	11.2329	11.2691	11.3344	11.3917	11.2918
ENSG00000049759	11.8249	11.7385	11.8459	11.8135	11.7546	11.7792	11.7375	11.7528	11.778	11.9096	11.8602	11.9551	11.9985	11.9577	11.8849	12.0835	12.1548	12.0105	12.5756	12.5725	12.4827
ENSG00000049768	2.85904	2.63673	3.27971	3.16545	2.73551	3.18359	2.45797	1.56437	1.78087	1.87298	2.57187	0.829407	2.15191	2.40767	1.53602	1.86576	0.711207	2.09925	2.41586	0.864807	2.19535
ENSG00000049769	7.83728	7.62001	7.7569	7.81517	7.65396	7.59055	7.70903	7.6765	7.72617	7.48714	7.67085	7.39271	7.50636	7.27562	7.64741	7.52638	7.36802	7.21741	6.84336	7.11836	7.21602
ENSG00000049860	11.2231	11.1707	11.1904	11.25	11.2353	11.296	11.1767	11.2762	11.1695	11.1187	11.1134	11.2318	11.2079	11.1912	11.2229	11.4844	11.4786	11.4595	12.0219	12.0776	11.9131
ENSG00000049883	8.02913	8.51191	8.3698	8.41705	8.40883	8.51574	8.46072	8.36569	8.25522	8.45054	8.44989	8.39508	8.22362	8.29093	8.1502	7.96852	8.03115	8.01145	7.17093	7.08385	7.63514
ENSG00000050030	3.88379	3.14222	4.82677	4.38752	4.06949	3.77674	4.30208	4.14066	3.72046	3.8394	4.68532	4.11404	3.60804	4.00644	4.10009	4.07619	4.36495	4.3722	4.10948	3.54526	3.55337
ENSG00000050130	9.70427	9.73426	9.76226	9.81515	9.68309	9.80581	9.98974	9.84401	10.0259	9.7619	9.79968	9.81493	9.86118	9.78752	9.77152	9.90042	9.9228	10.0659	9.96968	9.80867	9.85833
ENSG00000050165	8.12922	7.58121	8.1281	7.64604	7.83369	7.61626	7.35357	7.50054	7.57768	7.57707	7.48421	7.7089	7.26119	7.35366	7.46552	7.54693	7.66951	7.47883	8.08759	8.12594	8.07415
ENSG00000050327	10.4117	10.2703	10.2478	10.0243	10.3183	10.2671	10.1037	10.311	10.1317	10.6859	10.4987	10.4073	10.7391	10.9133	10.6847	11.1107	11.0736	11.0127	12.1274	12.2289	12.0427
ENSG00000050344	8.37735	7.73933	8.31447	7.97227	7.97271	8.1201	8.26383	8.31782	8.42334	8.37926	8.32195	8.39508	8.51602	8.4235	8.42201	8.49805	8.66886	8.74157	8.5508	8.5333	8.77989
ENSG00000050393	9.2533	9.13794	9.18842	9.28959	9.09367	9.12945	9.4648	9.24284	9.29823	9.23344	9.22747	9.26396	9.24187	9.49212	9.33333	9.44222	9.5127	9.47608	9.74753	9.81131	9.69346
ENSG00000050405	10.8909	10.812	10.905	10.778	10.8233	10.9974	10.6675	10.9406	10.7295	11.0814	10.9454	11.0597	11.1124	11.0042	11.0141	11.1719	11.0653	11.1871	12.1119	12.2045	11.9885
ENSG00000050426	9.96304	10.0576	10.0834	10.1332	10.0081	10.1117	10.0933	9.93481	10.1221	10.0143	9.93885	9.98163	9.7759	9.70805	9.7605	9.63689	9.71695	9.71049	9.3086	9.36167	9.37158
ENSG00000050438	2.2489	1.85184	2.24292	2.3179	1.77785	3.35625	1.32086	2.55917	2.55401	1.87298	1.16121	1.7359	1.84122	2.08053	1.94482	2.65288	2.09341	2.92024	2.90777	2.75439	2.6713
ENSG00000050748	10.348	10.2052	10.4041	10.4707	10.3796	10.3019	10.4911	10.3816	10.283	10.4084	10.3407	10.5034	10.4318	10.3894	10.3627	10.332	10.38	10.392	10.4018	10.3615	10.3005
ENSG00000050820	11.6161	11.4661	11.2395	11.0963	11.2874	11.183	11.15	11.4073	11.2993	11.6131	11.606	11.4434	11.7366	11.8309	11.8975	12.2705	12.1051	12.1087	12.882	12.9844	12.7822
ENSG00000051009	10.0727	10.2477	10.201	10.2896	10.2095	10.092	10.1685	10.1918	10.2929	10.201	10.1561	10.0123	10.0721	10.1273	10.0984	10.0495	10.0019	9.92433	9.85951	9.79939	9.74402
ENSG00000051108	12.1324	12.1577	12.2437	12.2824	12.2673	12.1611	12.2336	12.2779	12.2275	11.9942	12.0912	12.1092	11.8125	11.7955	11.895	11.7201	11.7931	11.784	11.8697	11.9067	11.8382
ENSG00000051128	8.47189	7.83897	8.08907	7.9375	7.92304	7.74613	7.78449	7.98592	7.81235	8.25901	8.22988	8.14087	8.67946	8.53166	8.66422	9.25924	9.24344	9.267	10.1518	10.3633	10.1041
ENSG00000051180	5.26798	5.07125	5.26061	5.35264	4.91408	5.15594	5.17817	5.2917	5.56347	5.55939	5.42758	5.54968	5.11189	5.31309	5.48215	5.46582	5.32951	5.24621	4.63518	4.72541	5.09234
ENSG00000051341	5.74267	4.76001	5.43674	5.42135	4.85476	5.72735	5.14801	5.21775	5.44744	6.13412	5.25147	5.72944	5.37396	4.96085	5.68224	5.14486	4.96462	5.62795	4.97061	4.12283	4.84524
ENSG00000051382	10.0541	9.97585	10.0851	10.0516	10.0923	10.0996	10.0853	9.92467	10.0641	10.1444	10.134	10.1763	10.1659	10.1805	10.045	10.1458	10.1326	10.0425	10.1136	10.0389	10.1866
ENSG00000051523	11.568	11.4417	11.2425	11.4636	11.3565	11.2523	11.3663	11.6458	11.5402	10.9785	11.3222	11.1369	11.1467	11.0886	11.47	11.3274	11.1533	11.409	11.1642	11.3193	11.2409
ENSG00000051596	9.36853	9.39012	9.36421	9.45919	9.38564	9.21359	9.33849	9.54499	9.48367	9.26716	9.25509	9.30081	9.21442	9.51832	9.32151	9.45777	9.35175	9.5276	9.40686	9.40375	9.13444
ENSG00000051620	10.7946	10.7021	10.6773	10.7381	10.7253	10.6299	10.6695	10.8721	10.745	10.5129	10.6929	10.6887	10.6446	10.6638	10.7285	10.804	10.7411	10.8067	10.7782	10.9373	10.8824
ENSG00000051825	8.83692	8.88673	9.17916	8.96939	9.0742	9.05308	9.00055	8.82393	8.9238	9.06195	9.04365	9.0053	8.87535	8.99375	8.64267	8.42222	8.46918	8.57759	8.01084	8.07852	8.12128
ENSG00000052126	10.258	10.4087	10.2475	10.1922	10.2788	10.3927	10.0734	10.1124	10.0191	10.3069	10.2558	10.3006	10.3098	10.3375	10.194	10.059	10.0293	10.1286	9.92855	9.93142	9.92626
ENSG00000052344	10.7524	10.8348	10.8042	10.7656	10.7284	10.7037	10.6932	10.8789	10.8305	10.5889	10.8452	10.7029	10.7948	10.8662	10.926	11.1333	11.1017	10.9927	11.4735	11.4542	11.2515
ENSG00000052723	10.1605	10.1533	10.2371	10.3819	10.3382	10.2873	10.4289	10.2086	10.4215	10.2721	10.2173	10.3227	10.1766	10.1314	10.1391	10.1129	10.1658	10.0998	10.0545	10.0557	10.0725
ENSG00000052749	9.20824	9.13124	9.08642	8.89282	9.17777	8.96579	8.94585	8.99142	8.96003	9.40569	9.21852	9.27305	9.5625	9.55128	9.60552	10.085	10.0122	10.0515	10.7666	10.7499	10.7027
ENSG00000052795	10.313	10.3053	10.3961	10.441	10.3205	10.394	10.386	10.1576	10.3864	10.4657	10.2616	10.424	10.1766	10.3471	10.0947	10.1547	10.4106	10.2079	10.5141	10.5714	10.4758
ENSG00000052802	14.4964	14.7948	14.9387	15.0014	14.9411	15.0062	15.091	14.9201	15.0039	14.5299	14.6083	14.7278	14.394	14.371	14.43	14.2486	14.2805	14.2482	13.9633	13.8643	13.9119
ENSG00000052841	10.956	10.9686	10.8919	10.889	11.0023	10.9893	10.9199	10.8638	10.8863	11.092	10.9943	10.9986	11.2105	11.211	11.094	11.4139	11.3825	11.2133	11.7756	11.7245	11.6812
ENSG00000053108	2.85904	2.9115	3.08186	3.90219	2.21529	2.76032	3.42464	3.77859	3.05467	2.18603	2.57187	3.25497	2.62439	3.09353	2.52352	2.84213	1.78688	2.35221	2.90777	3.64332	3.43896
ENSG00000053254	10.9441	11.1982	11.2365	11.1903	11.1164	11.1923	11.2522	11.0452	11.1426	11.2183	11.2114	11.2201	11.0197	11.0378	10.87	10.8701	11.0241	10.8549	10.7549	10.6249	10.6769
ENSG00000053328	4.47691	3.34108	4.20345	4.24316	3.96115	3.64972	4.55288	4.0583	4.66467	3.74704	3.86799	4.35219	3.12918	4.27062	4.51407	3.73785	3.43332	3.9802	4.35852	3.20335	4.09677
ENSG00000053371	10.1318	10.0925	9.99999	9.96354	10.1019	10.02	9.90548	10.1918	10.0003	9.80977	9.98711	9.9251	9.79	9.71536	10.1009	9.8448	9.74737	9.84147	9.48265	9.49727	9.45857
ENSG00000053372	9.09399	8.87074	8.79052	8.80555	8.75952	8.94902	8.89908	9.10604	8.96356	9.06434	9.04703	9.17562	9.46392	9.45055	9.53153	9.73716	9.67432	9.70766	10.0323	10.1039	9.92094
ENSG00000053501	8.34441	8.35403	7.90657	8.2238	8.31841	8.10201	7.90661	8.33978	8.31162	7.98348	8.11233	8.01652	8.18572	8.1613	8.14052	8.33432	8.10578	8.37125	8.04085	8.36386	8.18478
ENSG00000053524	4.21062	4.36262	2.24292	2.58077	4.51491	3.51044	3.92907	4.14066	4.07349	4.00806	3.98526	3.90547	4.25413	4.49383	4.17787	5.14486	3.81457	4.05338	5.39902	5.18218	5.01458
ENSG00000053747	10.413	10.2337	10.1592	9.95497	10.0778	10.1822	9.85736	9.97605	9.92463	10.5561	10.3707	10.2444	10.7076	10.8983	10.4806	11.1697	11.0969	10.9015	11.3277	11.191	11.3597
ENSG00000053770	9.9021	9.69845	9.96448	10.1204	9.88561	10.0006	10.0673	9.96761	10.1268	9.96004	9.87759	10.0997	9.92902	9.90071	9.87877	9.84618	9.86078	9.85182	9.93495	9.81131	9.75303
ENSG00000053900	10.0993	10.1232	10.1386	10.2056	10.2344	10.1794	10.2735	10.1662	10.095	10.1251	9.99761	10.1734	10.0394	9.97358	9.90902	9.73716	9.77863	9.71191	9.35948	9.17959	9.55441
ENSG00000053918	7.26332	7.1356	7.56164	6.99501	7.19721	7.00068	6.87167	7.31791	6.49067	6.88468	7.1987	6.67248	6.87333	6.81968	6.93777	6.62718	6.8086	6.50004	6.20231	6.22687	5.90858
ENSG00000054116	10.6914	10.5991	10.5609	10.6307	10.5691	10.7393	10.6575	10.6893	10.5791	10.4538	10.6155	10.6084	10.6508	10.6052	10.7106	10.7311	10.6509	10.7955	10.7612	10.8932	10.8365
ENSG00000054118	11.8124	11.8194	11.7381	11.7356	11.8069	11.8208	11.7403	11.7368	11.714	11.9005	11.8764	11.8326	11.8242	11.8462	11.6687	11.6773	11.6129	11.6694	11.6454	11.6677	11.7204
ENSG00000054148	10.9686	10.9667	10.8271	10.9557	10.9042	10.7499	10.6407	10.9669	10.89	10.6013	10.7396	10.6091	10.535	10.4683	10.6411	10.4853	10.3185	10.6519	10.1178	10.1305	10.242
ENSG00000054179	4.47691	5.96176	5.6662	4.8025	5.94787	5.41222	5.37329	5.75092	5.56347	5.19002	5.88541	4.85651	5.24887	5.38918	5.35398	4.58014	5.17497	5.11561	3.8083	3.20335	4.24032
ENSG00000054219	4.00115	4.26808	5.00508	4.94932	4.66058	4.19585	4.91713	4.42985	4.15959	4.92085	5.05084	5.07177	4.79141	4.74616	5.09798	4.6748	5.10821	4.93375	5.86931	6.11168	5.4872
ENSG00000054267	9.4622	9.60333	9.62254	9.41599	9.55151	9.64534	9.45097	9.37314	9.3038	9.87825	9.71731	9.76406	9.80992	9.57794	9.51746	9.6044	9.71695	9.58337	9.95061	9.78791	9.87409
ENSG00000054277	11.4393	11.1217	11.2883	11.3639	11.2097	11.2435	11.3613	11.359	11.3731	11.2996	11.3057	11.4137	11.3349	11.2012	11.3306	11.4716	11.5428	11.5571	11.7341	11.7589	11.6816
ENSG00000054282	8.42013	8.22157	8.14723	8.2238	8.38282	8.39222	8.1694	8.2865	8.05171	8.53927	8.19378	8.50098	8.33936	8.59798	8.33556	8.50856	8.49685	8.46475	8.52556	8.52689	8.50216
ENSG00000054356	4.21062	2.9115	3.45366	2.9956	4.17025	2.98742	2.95264	2.78082	3.58056	3.54245	3.74033	3.97839	2.40741	3.41804	3.8379	4.07619	4.11585	3.44023	5.86931	6.66069	5.51571
ENSG00000054392	8.22884	7.98201	8.06916	8.13454	8.06066	7.62473	8.13905	7.87601	8.11646	7.96822	8.18155	8.10874	8.07952	8.11163	8.16937	8.21527	8.27512	7.9457	8.38292	8.4779	8.32022
ENSG00000054523	10.9596	11.0383	11.0365	10.8541	11.0209	11.0716	10.9524	10.9297	10.9024	11.2585	11.1572	11.2346	11.3498	11.5019	11.1781	11.4003	11.4739	11.3147	11.5682	11.5596	11.5565
ENSG00000054611	9.57061	9.64773	9.6967	9.52245	9.73953	9.61287	9.50254	9.73887	9.67879	9.58145	9.67211	9.72242	9.68978	9.68747	9.88168	9.85857	9.69863	9.71473	9.52784	9.50877	9.60669
ENSG00000054654	10.2987	10.5746	10.3706	10.1836	10.4626	10.4439	10.0481	10.1452	10.0674	10.331	10.247	10.327	10.1626	10.233	9.96768	9.59967	9.58967	9.63948	9.40172	9.22187	9.44751
ENSG00000054690	10.2858	10.3377	10.1995	10.2827	10.2575	10.2467	10.2515	10.0854	10.2689	10.5085	10.3639	10.4216	10.5105	10.6201	10.37	10.5714	10.5818	10.4242	10.5322	10.464	10.5379
ENSG00000054793	11.1019	11.2142	11.2841	11.3033	11.1515	11.173	11.2031	11.0243	11.2234	11.202	11.2279	11.2567	11.1798	11.2234	11.1207	11.1496	11.2653	11.0625	11.3638	11.3721	11.271
ENSG00000054965	10.4183	10.5635	10.3908	10.3722	10.4626	10.4294	10.3811	10.2217	10.3275	10.4281	10.4275	10.37	10.2022	10.2004	10.1281	9.94368	9.90078	9.94851	9.5384	9.39724	9.65714
ENSG00000054967	5.67363	5.27945	5.6662	5.2805	5.02587	4.95571	4.84376	5.58434	5.23055	5.8532	5.25147	5.28802	6.19628	6.21345	5.83411	7.07675	6.85005	7.00325	8.52979	8.647	8.32022
ENSG00000054983	10.187	10.1316	10.3404	10.3958	10.094	10.2467	10.3367	10.1352	10.3613	10.1523	10.1778	10.3112	10.0581	9.90881	10.0201	9.81687	9.7973	9.82202	9.65938	9.6452	9.76049
ENSG00000055044	9.297	9.14461	9.25458	9.21414	9.26295	9.34977	9.11716	9.40367	9.20899	9.24403	9.37983	9.40291	9.59016	9.4616	9.51101	9.74903	9.69579	9.71049	10.1567	10.0723	10.1427
ENSG00000055070	11.852	11.8178	11.8464	11.81	11.8808	11.8231	11.841	11.9247	11.8943	11.8093	11.8149	11.8134	11.7565	11.696	11.8747	11.7986	11.8194	11.8628	11.9117	12.0046	11.9251
ENSG00000055118	3.46055	3.14222	3.27971	2.9956	3.24824	2.76032	2.80582	3.1424	3.58056	3.0181	3.74033	3.36785	2.97972	4.34893	4.25167	4.91125	4.11585	3.73533	5.63762	6.34815	5.74967
ENSG00000055130	10.6279	10.5472	10.5915	10.4421	10.5006	10.7077	10.5097	10.6281	10.5711	10.6451	10.6646	10.8022	10.8321	10.8024	10.7917	10.8708	10.8409	10.8568	11.0398	11.0252	11.0224
ENSG00000055147	9.15857	9.34026	9.36762	9.45235	9.32163	9.50462	9.36344	9.34842	9.17898	9.37323	9.23637	9.45654	9.24801	9.34941	9.21839	9.19559	9.20252	9.11718	9.1497	8.96644	9.00013
ENSG00000055163	10.5372	10.7597	10.6969	10.6307	10.7881	10.7167	10.5478	10.5596	10.4706	10.5971	10.6436	10.5896	10.53	10.6151	10.5352	10.4097	10.5101	10.4465	10.411	10.4076	10.3841
ENSG00000055208	10.3944	10.4496	10.4865	10.5185	10.5282	10.5365	10.5015	10.4709	10.5687	10.5645	10.5586	10.6205	10.4968	10.5168	10.5185	10.4639	10.619	10.4617	10.8713	10.8302	10.8001
ENSG00000055211	10.0575	10.1876	10.1323	10.0624	10.0566	10.072	9.98441	10.1137	10.0376	9.97666	10.084	10.139	9.90201	9.84438	10.0161	9.89642	9.98808	9.92798	9.93495	9.8808	10.0336
ENSG00000055332	10.6494	10.6942	10.8222	10.8342	10.7128	10.89	10.954	10.5782	10.8382	10.882	10.7888	10.9272	10.951	11.005	10.7196	10.7919	10.867	10.7356	10.7321	10.6801	10.7417
ENSG00000055483	9.83056	9.78208	9.68802	9.61152	9.70215	9.63609	9.53203	9.65553	9.61298	10.0352	9.96407	9.76941	10.1745	10.2624	10.1488	10.3994	10.3958	10.2878	11.1656	11.3226	11.0373
ENSG00000055609	10.7977	10.8224	10.9032	10.8159	10.8029	10.8935	10.8265	10.6388	10.7933	11.0382	10.9978	10.8929	10.9187	11.0459	10.6925	10.8118	10.8876	10.7888	10.9852	10.9319	10.9209
ENSG00000055732	1.80823	2.63673	1.80282	2.58077	2.21529	4.00146	2.80582	2.78082	3.05467	1.47262	2.57187	1.7359	2.62439	2.08053	1.53602	3.91692	2.56104	3.06883	3.91583	4.48211	3.8505
ENSG00000055917	11.2537	11.1625	11.342	11.4118	11.1607	11.2177	11.3765	11.224	11.3446	11.3551	11.2129	11.4426	11.2871	11.2478	11.1451	11.3045	11.3772	11.2287	11.4996	11.5146	11.4132
ENSG00000055950	10.2843	10.2904	10.2371	10.3135	10.2416	10.2979	10.1571	10.412	10.2929	10.0761	10.142	10.1489	10.0949	9.89908	10.2945	10.2202	9.95759	10.2658	9.83232	9.76304	9.84856
ENSG00000055955	12.9179	13.1659	12.9939	13.0625	13.1214	13.1618	12.9303	13.1411	12.9805	12.9143	12.9713	12.8565	12.8405	12.8482	13.0017	12.8552	12.7439	12.7119	12.6916	12.7174	12.6359
ENSG00000055957	14.7505	15.0218	14.867	14.8544	14.9474	14.9072	14.6659	14.8941	14.7311	14.4841	14.5871	14.5165	14.0176	13.9832	14.2234	13.6967	13.5603	13.7	13.0984	13.0446	13.0699
ENSG00000056050	8.51199	8.3655	8.4694	8.56483	8.60159	8.60404	8.49707	8.70378	8.6193	8.43582	8.42934	8.54965	8.59203	8.48981	8.69761	8.50156	8.25597	8.5077	8.02292	8.2863	8.03525
ENSG00000056097	11.3202	11.31	11.3862	11.3542	11.2923	11.3197	11.3206	11.3083	11.3262	11.4751	11.3915	11.4442	11.3692	11.244	11.295	11.2832	11.4161	11.2985	11.5656	11.606	11.5374
ENSG00000056277	7.6067	7.88182	7.88394	7.87763	7.9158	7.94181	8.10413	7.62736	8.19052	7.99858	7.94144	7.89464	8.15118	8.20407	8.19298	8.38085	8.49358	8.23239	8.4912	8.56493	8.45511
ENSG00000056291	4.39349	3.94044	4.46967	3.80268	3.57667	3.51044	4.18813	3.43127	4.07349	4.42058	3.86799	4.11404	3.96696	3.79894	4.17787	4.21961	4.11585	5.08102	6.26466	6.77327	6.3337
ENSG00000056487	1.80823	3.67166	2.57968	1.99623	2.21529	2.15875	2.45797	1.97681	2.55401	2.18603	2.23553	1.7359	1.44471	2.40767	2.26299	1.46627	2.91363	1.40186	3.27393	3.82146	2.6713
ENSG00000056558	7.56918	7.91339	7.57112	7.50279	7.36604	7.64152	7.50403	7.37006	7.22512	7.62974	7.58984	7.68731	7.37782	7.41865	7.34425	7.44113	7.12795	7.10142	7.70837	7.92614	7.37226
ENSG00000056586	11.1519	10.9956	11.238	11.2838	11.1045	11.1657	11.3206	11.1539	11.2249	11.2762	11.2182	11.3265	11.2225	11.2037	11.0566	11.1757	11.2772	11.1851	11.4602	11.4325	11.3542
ENSG00000056736	8.86154	8.71818	8.90356	8.93749	8.89452	8.88349	8.89908	9.03783	8.90976	8.6518	8.71902	8.76077	8.37721	8.20932	8.39377	7.86322	7.98072	7.96479	6.89684	7.16037	6.98072
ENSG00000056972	8.98422	8.88673	8.91104	8.91086	8.85343	8.93887	8.69257	8.83634	8.82317	8.55638	8.88291	8.74779	8.95448	8.86106	8.91194	8.61295	8.83291	8.68224	8.23503	8.50424	8.41784
ENSG00000056998	11.0594	11.1056	11.0844	11.1268	11.1021	11.1585	11.198	11.1389	11.1222	11.0617	11.0997	11.1339	10.9778	10.9503	11.0469	10.6191	10.5365	10.6629	9.66709	9.56302	9.6762
ENSG00000057019	10.076	10.0164	10.1949	10.1946	9.9437	10.0264	10.2381	10.0378	10.1943	10.2365	10.0304	10.2619	10.2053	10.2004	10.1009	10.3622	10.4889	10.2494	11.12	11.1985	10.9725
ENSG00000057252	9.53699	9.39999	9.51967	9.64423	9.44994	9.66306	9.80033	9.57821	9.64626	9.50421	9.40373	9.59632	9.29227	9.30345	9.30544	9.17594	9.29172	9.2804	9.39011	9.44221	9.53017
ENSG00000057294	10.9998	10.9666	11.066	10.9907	10.8909	11.032	10.9626	10.9144	11.0543	10.9313	10.9471	10.915	10.8496	10.7707	10.704	10.7636	10.7327	10.6831	10.6251	10.5534	10.5404
ENSG00000057593	10.5815	10.8724	10.8012	10.5467	10.8634	10.7422	10.4234	10.6564	10.5664	10.6306	10.6919	10.4467	10.5358	10.4943	10.5581	10.2116	10.0281	10.1307	9.45171	9.27446	9.38322
ENSG00000057608	13.0074	13.0205	13.1285	13.1559	13.131	13.1843	13.0719	13.2022	13.1352	12.9925	13.0777	13.1093	13.0484	12.9825	13.0486	13.0395	13.0328	13.0957	13.0202	13.0559	13.0035
ENSG00000057663	9.59649	9.53553	9.7203	9.76811	9.64639	9.6855	9.58224	9.65728	9.65501	9.57475	9.61183	9.66972	9.66551	9.59209	9.66413	9.79985	9.77595	9.82072	9.87958	9.9229	9.7885
ENSG00000057704	4.63054	4.53491	4.69434	4.38752	3.96115	4.72313	4.76646	4.29249	5.23055	5.15451	5.34221	4.23802	4.18752	4.96085	4.62931	5.18037	4.8467	5.14938	5.6687	6.36262	5.70086
ENSG00000057757	9.94118	9.97772	9.87363	10.0864	10.0081	9.87843	10.0337	10.0644	10.0021	9.82961	9.91872	9.96938	9.99136	9.99352	10.0897	10.078	10.0857	10.1116	10.085	10.2608	10.2367
ENSG00000057935	9.97026	9.96082	10.007	10.057	10.0233	10.1222	10.0275	10.0093	9.90826	9.92095	9.8738	9.92625	9.83286	9.784	9.96082	9.6902	9.74469	9.70483	9.55096	9.38135	9.48763
ENSG00000058056	8.37191	8.24657	8.52408	8.45441	8.42931	8.24619	8.63665	8.21227	8.3659	8.6196	8.62727	8.60827	8.4782	8.60597	8.52977	8.48035	8.59459	8.4681	8.11041	8.02495	8.0837
ENSG00000058063	10.5529	10.5697	10.6969	10.606	10.5482	10.7157	10.7639	10.5188	10.6277	10.6315	10.6591	10.7354	10.6227	10.6866	10.4613	10.5359	10.6971	10.5145	10.8604	10.8418	10.7417
ENSG00000058085	7.50107	7.31181	7.01329	6.62437	7.07257	6.80592	6.71591	7.3001	7.22512	7.83996	7.30405	7.69815	7.45064	7.64502	7.46552	7.65183	7.45791	7.63599	9.34993	9.53774	9.12333
ENSG00000058091	8.81019	8.90255	8.74989	8.84985	8.72681	8.57938	8.93926	8.80195	8.89507	8.7383	8.67606	8.81653	8.71241	8.73186	8.67767	8.71332	8.94715	8.80652	9.1078	8.89109	8.94094
ENSG00000058262	12.9506	12.989	13.0186	13.111	12.968	12.9608	13.1147	13.0478	13.1409	12.9488	13.0396	12.9916	12.8766	12.8665	12.9851	12.993	13.068	13.0017	13.2608	13.3227	13.2198
ENSG00000058272	10.2372	10.2116	10.2146	10.0187	10.1552	10.259	10.1061	10.12	10.1315	10.4169	10.247	10.2917	10.3389	10.2317	10.2412	10.2838	10.3523	10.2649	10.7061	10.6502	10.5731
ENSG00000058404	3.46055	4.05811	3.08186	3.99528	3.42178	2.76032	3.08589	3.97095	3.25204	2.85068	4.28886	2.99866	2.97972	3.09353	3.63222	4.58014	3.6365	3.44023	4.0159	3.73514	4.17033
ENSG00000058453	9.11321	9.13118	8.84635	8.67407	8.85362	8.76592	8.67039	8.66604	8.61961	9.07026	9.09152	8.63629	9.02888	9.18629	8.97202	9.08735	8.73842	8.9212	8.6676	8.73485	8.63226
ENSG00000058600	9.92456	9.82214	9.70318	9.66208	9.87445	9.7946	9.70773	9.87441	9.76008	9.91034	10.008	9.85663	10.1364	10.1534	10.1728	10.2828	10.2359	10.3197	10.5469	10.5605	10.537
ENSG00000058668	11.2322	11.3667	11.4544	11.3146	11.286	11.3959	11.2855	11.224	11.3594	11.4008	11.2898	11.43	11.4677	11.5158	11.3459	11.5503	11.6327	11.4523	11.8152	11.8008	11.7253
ENSG00000058673	11.7066	11.5531	11.4873	11.4877	11.6998	11.7281	11.5699	11.6141	11.3752	11.7834	11.7282	11.7064	11.7414	11.5369	11.5097	11.6072	11.5101	11.7531	11.9532	11.9343	11.9264
ENSG00000058729	9.44158	9.29303	9.34294	9.33482	9.50162	9.61287	9.31845	9.63969	9.23838	9.48289	9.30002	9.41609	9.48487	9.50927	9.45157	9.45677	9.50299	9.4373	9.65938	9.62884	9.67462
ENSG00000058799	9.90021	9.98517	10.007	10.132	10.025	10.0103	9.95858	10.0983	10.0691	9.80119	9.98182	9.91469	9.8824	9.81881	9.85529	9.80128	9.7973	9.98755	9.7329	9.55989	9.59505
ENSG00000058804	8.77354	8.4594	8.68541	8.77634	8.60159	8.66279	8.78367	8.75697	8.83861	8.76504	8.67169	8.9517	8.81527	8.79266	8.80569	8.89527	8.82254	8.95952	8.80272	8.7742	8.85431
ENSG00000058866	4.76937	3.94044	2.57968	3.99528	3.71653	3.64972	4.30208	3.29405	3.58056	4.15906	4.53954	4.5081	4.92007	4.27062	4.78655	5.9084	6.17131	5.98669	7.58347	7.82529	7.57547
ENSG00000059122	9.7129	9.8872	9.6705	9.46868	9.77995	9.53638	9.48001	9.59657	9.53221	9.85611	9.77138	9.59342	9.8518	9.99808	10.0227	10.1648	10.1441	10.0802	10.3844	10.4815	10.3429
ENSG00000059145	8.86154	8.92983	8.79861	8.68498	8.89452	8.89754	9.04738	8.8669	8.9949	9.15698	9.1667	8.92428	9.85717	9.93602	9.7809	10.3201	10.4848	10.2248	10.7933	10.7312	10.698
ENSG00000059377	5.63783	6.02093	5.00508	5.72298	5.31711	5.24652	5.20771	5.61348	5.18296	5.32393	5.50818	5.37162	5.7187	5.77682	5.45116	5.21502	5.44222	5.52878	4.91985	5.08082	5.20164
ENSG00000059378	9.20519	9.10413	9.1061	9.06106	9.07754	8.99547	9.0757	9.11116	9.40059	9.24192	9.15423	9.31413	9.24596	9.24578	9.23213	9.22989	9.1965	9.21212	8.76367	8.74136	8.87921
ENSG00000059573	11.5091	11.6077	11.6215	11.6018	11.5966	11.6147	11.5033	11.5786	11.5752	11.462	11.4741	11.5467	11.3795	11.2956	11.3606	11.2067	11.2653	11.3037	11.0887	10.9607	11.082
ENSG00000059588	9.68466	9.58293	9.75812	9.62615	9.68096	9.77381	9.86549	9.51786	9.50828	9.77949	9.79165	9.6349	9.84372	9.79628	9.68925	9.42937	9.56499	9.33645	8.93003	8.88108	8.91976
ENSG00000059691	9.08071	9.17097	9.16672	9.08509	9.15643	9.31357	9.0817	9.37843	9.23838	9.04022	9.03347	9.00939	9.04428	8.98577	9.07583	9.0758	9.05744	9.12144	9.00804	8.97117	8.89827
ENSG00000059728	9.1363	9.36331	9.52942	9.42124	9.26864	9.41957	9.58365	9.31998	9.42891	9.36743	9.44014	9.3896	9.10193	9.23293	9.13309	9.35168	9.51593	9.23393	10.733	10.8863	10.5396
ENSG00000059758	8.80213	8.81331	8.91848	9.03937	8.83437	8.90451	8.98903	9.10091	8.96356	8.98063	8.99902	9.14822	8.98177	9.02804	9.00557	9.01318	9.04856	9.08481	9.38778	9.45914	9.279
ENSG00000059769	9.14183	8.98763	9.32665	9.26398	9.30613	9.31851	9.30353	9.2155	9.23873	9.14013	9.28202	9.17185	9.07298	9.14541	9.11415	8.95117	9.01563	8.95676	8.86288	8.94465	8.84049
ENSG00000059804	6.47228	6.54907	6.7685	6.46083	6.47272	6.34686	6.82582	6.42796	6.26886	6.51069	6.21786	6.48461	6.51956	5.77993	6.51755	6.06268	6.43442	6.33168	5.15178	4.11191	4.77671
ENSG00000059915	4.95539	5.58415	5.26061	4.85312	5.63178	5.33175	5.63487	5.01434	5.13375	5.15451	5.29756	5.10472	4.69878	5.00988	5.13745	4.77853	4.24577	4.5846	4.50347	4.18927	3.93735
ENSG00000060069	9.60578	9.62645	9.48752	9.3169	9.57237	9.47214	9.25796	9.58558	9.41867	9.61776	9.70881	9.51898	9.74728	9.76806	9.77152	9.85582	9.74469	9.78087	10.0574	10.0855	9.95386
ENSG00000060138	11.2996	11.264	11.1942	11.1811	11.2184	11.1577	11.122	11.2762	11.2496	11.3043	11.3498	11.3164	11.4641	11.4743	11.492	11.871	11.7686	11.7397	12.2926	12.4691	12.251
ENSG00000060237	13.0192	13.1322	13.1565	13.0474	13.1135	13.138	13.0837	13.0161	13.1001	13.2728	13.2183	13.2129	13.2598	13.3307	13.1267	13.1169	13.1769	13.1062	13.1032	13.0983	13.1158
ENSG00000060339	10.726	10.74	10.6608	10.4978	10.7631	10.7787	10.506	10.6503	10.4768	10.8732	10.7417	10.8685	11.0345	11.0721	10.8508	11.153	11.0448	11.0541	11.3332	11.2861	11.3821
ENSG00000060491	11.082	11.2532	10.8966	10.7698	11.1021	11.0565	10.7763	10.9823	10.8477	11.0831	11.1358	10.9163	11.1028	11.1183	11.1133	11.0154	10.7912	10.9058	10.9382	10.9866	11.0243
ENSG00000060566	10.8317	10.9601	10.8122	10.6621	10.979	10.8625	10.6939	10.9697	10.7562	10.9702	11.0751	10.8315	11.335	11.3958	11.3777	11.4928	11.3522	11.4297	10.7403	10.5086	10.7877
ENSG00000060642	8.81421	8.7622	8.92588	9.07446	9.0247	9.07178	8.82238	8.97468	8.9387	8.64221	8.82509	8.7685	8.56604	8.5155	8.7716	8.50856	8.62177	8.42049	8.30098	8.21634	8.13052
ENSG00000060656	11.2201	11.3949	11.2034	11.0523	11.1925	11.1686	11.0175	11.1876	11.1063	11.2401	11.261	11.0649	11.2716	11.3489	11.2513	11.2265	11.0877	11.1056	10.8003	10.8184	10.6941
ENSG00000060688	9.08404	9.34316	9.09301	9.17488	9.15643	9.02456	9.17626	9.20266	9.1265	8.97301	9.09674	9.0459	8.98667	8.90384	9.13065	9.10149	9.08374	9.17571	8.77085	9.03353	9.09998
ENSG00000060718	3.28651	3.14222	2.85251	1.99623	2.8223	2.15875	3.08589	2.55917	3.05467	3.30397	3.74033	2.28829	3.60804	3.41804	2.52352	2.17828	2.09341	0.864901	2.41586	1.79214	2.6713
ENSG00000060749	10.2146	10.2383	10.3377	10.3404	10.2632	10.3435	10.453	10.1797	10.3759	10.452	10.3059	10.4902	10.5844	10.6752	10.4219	10.7228	10.9408	10.6918	11.2738	11.1874	11.2156
ENSG00000060762	10.1901	10.0839	10.2101	10.2274	10.2731	10.3111	10.2506	10.3837	10.3492	10.1262	10.1165	10.2935	10.167	9.89746	10.2332	10.0686	9.99964	10.2484	9.77457	9.74245	9.7885
ENSG00000060971	13.2972	13.5177	13.4381	13.4557	13.5603	13.5082	13.2962	13.5568	13.3545	13.3494	13.4465	13.2404	13.2508	13.2645	13.41	13.0283	12.9221	13.0181	12.2253	12.197	12.2736
ENSG00000060982	11.44	11.4784	11.7396	11.7594	11.5773	11.6867	11.7924	11.6343	11.7894	11.764	11.7778	11.8503	11.9453	11.9448	11.7828	11.8615	11.9974	11.8503	11.9549	11.8616	11.861
ENSG00000061273	10.7721	10.5064	10.4587	10.3404	10.4147	10.2316	10.3656	10.3984	10.4406	10.8949	10.7888	10.7485	10.9949	11.0356	10.9442	11.2008	11.2567	11.1077	11.375	11.3235	11.397
ENSG00000061337	3.75603	3.67166	3.27971	3.3174	1.77785	2.49067	3.69879	2.78082	3.42564	3.0181	4.53954	3.36785	4.11768	4.85749	4.17787	4.35006	4.36495	4.25298	3.27393	3.54526	3.43896
ENSG00000061455	4.30495	5.54437	4.94805	4.75004	4.97106	5.15594	5.02064	4.96997	4.97518	5.32393	4.93898	5.31643	4.5998	5.35163	4.51407	4.68274	3.97306	4.68012	3.91583	4.72541	4.09677
ENSG00000061656	6.17614	6.23599	5.5937	5.77642	6.03062	5.90472	5.63487	5.85217	6.47099	5.53197	5.72604	5.90806	5.62112	5.8859	5.62785	5.9084	5.57176	5.57922	6.18091	6.14554	5.57108
ENSG00000061676	12.0343	12.0217	12.1676	12.1783	12.0801	12.1479	12.2285	12.0999	12.1798	12.1718	12.1548	12.2906	12.2395	12.3125	12.1694	12.2997	12.3917	12.3004	12.629	12.5964	12.508
ENSG00000061794	10.8543	10.8563	10.8575	10.8615	10.8378	10.9273	10.8164	11.1327	10.877	10.8225	10.8759	10.9602	10.9673	10.9518	10.9934	11.0252	10.971	11.1301	11.093	11.087	11.0224
ENSG00000061918	4.00115	3.34108	4.38627	3.45486	2.21529	2.98742	3.61307	3.55657	3.42564	3.92619	3.2713	2.99866	3.12918	4.18782	3.39227	3.53337	3.81457	3.9802	3.56572	4.12283	4.09677
ENSG00000061936	10.1855	10.047	10.0449	9.75319	10.0713	9.86955	9.75602	9.96479	9.71479	10.1835	10.1577	9.94911	10.0593	10.1217	10.0293	10.0265	9.96704	9.98871	10.1457	10.1681	10.0701
ENSG00000061938	9.69123	9.90301	9.63255	9.31239	9.73953	9.72345	9.55664	9.40991	9.40318	9.87123	9.9605	9.70103	9.86785	9.97974	9.83292	9.80128	9.68438	9.62305	9.60418	9.61833	9.55784
ENSG00000061987	10.5601	10.7078	10.8162	10.8905	10.7107	10.8372	10.9337	10.5661	10.8324	10.7982	10.6536	10.7524	10.5665	10.6161	10.5081	10.368	10.4261	10.3197	10.389	10.3406	10.3349
ENSG00000062038	3.46055	4.16691	4.76207	3.90219	4.51491	4.28403	4.64214	3.77859	3.42564	3.64837	2.23553	3.74753	3.88525	3.09353	3.25546	4.52597	3.89599	3.64351	3.56572	3.64332	4.09677
ENSG00000062194	10.7597	10.794	10.9356	10.8389	10.9097	10.9561	10.8531	10.8983	10.8071	10.9574	10.9161	11.0154	10.9925	10.9193	10.8641	11.0584	11.1351	11.0674	11.55	11.6006	11.4376
ENSG00000062282	11.645	11.9929	11.9485	11.9168	12.0045	12.004	11.9493	11.9438	11.8378	11.508	11.7418	11.5682	11.0892	11.0415	11.2524	10.3525	10.3639	10.5646	9.45394	9.54093	9.46223
ENSG00000062370	7.17864	7.25132	7.51332	7.25239	7.36604	7.43554	7.30656	7.23598	7.24842	7.48714	7.53318	7.58595	7.44352	7.22461	7.26627	7.15914	7.30979	7.38271	7.36369	7.11836	7.27557
ENSG00000062485	11.7299	11.7632	11.7514	11.8343	11.7446	11.65	11.778	11.7591	11.8354	11.669	11.7067	11.7457	11.6659	11.6447	11.7436	11.7982	11.7937	11.8072	11.7732	11.7734	11.7872
ENSG00000062524	1.80823	2.63673	1.80282	2.80304	2.8223	2.98742	3.08589	3.67184	2.55401	3.54245	2.57187	2.28829	2.97972	4.00644	3.10429	3.41912	3.81457	2.75457	6.092	6.27355	5.3672
ENSG00000062582	10.39	10.2549	10.3941	10.5077	10.4614	10.4463	10.4911	10.6012	10.4554	10.0152	10.2957	10.1587	10.0535	10.0824	10.3721	10.1288	10.0888	10.3856	9.74504	9.90074	9.97048
ENSG00000062598	9.69993	9.66174	9.72668	9.5244	9.69371	9.7195	9.66976	9.76344	9.67018	9.86712	9.8156	9.81617	9.79421	9.85951	9.81629	9.86948	9.90938	9.78759	9.95872	9.90448	9.94603
ENSG00000062650	10.4878	10.4657	10.5248	10.4441	10.497	10.5354	10.4722	10.4518	10.3719	10.7039	10.6635	10.7042	10.7508	10.7743	10.549	10.8461	10.7718	10.748	11.1346	11.1246	11.1704
ENSG00000062716	12.0863	11.9083	12.0396	12.0516	12.0125	11.9687	12.1964	12.1229	12.1638	12.0798	12.1402	12.1676	12.3811	12.4093	12.2189	12.4636	12.4621	12.4061	12.5932	12.6584	12.5917
ENSG00000062725	10.0558	9.91671	10.1048	10.1498	10.0517	9.99243	10.2318	10.0229	10.2152	10.034	10.0641	10.128	10.0628	10.037	9.9232	10.0019	10.1462	10.0324	10.2236	10.1956	10.2119
ENSG00000062822	8.43063	8.35978	8.19702	8.21898	8.24522	8.2016	8.11975	8.33978	8.31162	8.59993	8.52928	8.25901	8.52279	8.48981	8.69431	8.67338	8.41979	8.38194	8.54662	8.71905	8.49502
ENSG00000063046	12.9672	12.9593	12.9561	13.0194	12.9475	12.9521	12.9728	13.0293	13.025	12.936	12.9872	13.0283	12.9171	12.9122	12.9288	12.942	12.9422	13.004	13.0085	13.0646	13.0732
ENSG00000063127	6.17614	5.86818	6.06521	6.03944	6.05717	5.93227	6.28825	5.80243	5.48716	6.53022	5.75935	6.0836	5.87504	5.74821	5.80988	5.43675	6.05205	5.84959	5.81478	5.8077	5.57108
ENSG00000063169	9.33102	9.41386	9.05639	8.94042	9.13789	9.12647	8.98477	8.98586	8.97757	9.27537	9.23341	9.2044	9.30999	9.43268	9.1952	9.46939	9.48666	9.22999	9.45617	9.34355	9.26017
ENSG00000063176	10.7461	10.9401	10.6641	10.6469	10.7701	10.6997	10.7995	10.8254	10.8468	10.882	10.9873	10.7692	10.9529	10.9032	11.1397	10.9577	10.8441	10.8739	10.3	10.0963	10.3319
ENSG00000063177	12.8486	12.7621	12.6612	12.8977	12.7567	12.6946	12.6087	12.9071	12.8371	12.4811	12.5887	12.5708	12.5149	12.4056	12.7228	12.7625	12.7116	12.9388	12.7684	12.9365	12.8274
ENSG00000063180	3.28651	3.51582	3.08186	3.3174	1.77785	3.77674	2.95264	3.43127	2.82595	3.42813	3.2713	2.50124	3.38839	2.89903	3.39227	3.53337	2.91363	2.75457	2.08824	3.20335	3.7581
ENSG00000063241	10.7482	10.7834	10.5833	10.6858	10.7346	10.7127	10.5171	10.8355	10.7511	10.2988	10.4746	10.32	10.1441	10.0341	10.3311	10.0019	9.92644	10.057	9.44275	9.3902	9.39861
ENSG00000063244	11.4664	11.3823	11.2268	11.2081	11.4109	11.2149	11.2406	11.3565	11.318	11.4173	11.3988	11.3533	11.4429	11.4836	11.5324	11.6423	11.5128	11.5241	11.7621	11.8183	11.7578
ENSG00000063245	11.8194	11.9287	11.7548	11.606	11.8928	11.7587	11.6574	11.9294	11.78	11.7855	11.9323	11.7478	11.8763	11.882	12.0197	11.9181	11.8047	11.8513	11.7724	11.8737	11.7574
ENSG00000063322	10.2162	10.2874	10.1872	10.1661	10.1444	10.1371	10.0603	10.2544	10.1046	10.1523	10.2038	10.13	10.0881	10.1035	10.0592	9.95654	9.97174	9.98404	9.71812	9.72436	9.63457
ENSG00000063438	2.96223	1.34464	3.18615	1.63813	2.23403	2.12858	3.09982	1.89565	2.86507	2.32541	2.97495	1.98557	2.14911	1.32606	2.22539	2.53714	1.65837	2.0255	1.79566	2.85114	2.23703
ENSG00000063587	9.10714	9.29002	9.21887	9.17488	9.06778	9.09939	9.15935	9.12892	9.21787	9.1726	9.36638	9.26396	9.24187	9.13135	9.2902	9.17374	9.21843	8.99013	9.23264	9.01074	9.08342
ENSG00000063601	9.68685	9.74087	9.78686	9.71607	9.69582	9.68752	9.79425	9.75693	9.9515	9.79975	9.71306	9.98274	9.74873	9.78576	9.72207	9.7564	9.87089	9.74266	9.901	10.0513	9.93947
ENSG00000063660	10.3997	10.3933	10.1826	10.0691	10.3409	10.1503	10.0683	10.2682	10.3041	10.4355	10.4896	10.1539	10.4064	10.4639	10.5241	10.7709	10.7383	10.6401	11.2079	11.4377	11.1289
ENSG00000063761	7.82936	7.78272	7.74857	7.8715	7.87159	8.0145	7.9378	7.91164	7.78313	7.86214	7.78848	8.02516	8.2319	7.89385	7.94861	8.00363	8.03565	7.78846	7.96776	8.0829	7.93861
ENSG00000063854	10.4727	10.6574	10.4068	10.5146	10.6726	10.5959	10.4012	10.6129	10.5571	10.312	10.4506	10.3751	10.122	10.1521	10.3627	10.013	9.81703	10.0769	9.80636	9.85928	9.76644
ENSG00000063978	10.2654	10.0589	10.299	10.3214	10.2109	10.1222	10.3392	10.3022	10.3492	10.32	10.372	10.37	10.4452	10.3375	10.4515	10.7062	10.6705	10.608	11.0383	11.0749	10.9321
ENSG00000064012	9.30272	9.284	9.44436	9.44824	9.28558	9.33695	9.51883	9.50431	9.46666	9.42631	9.39316	9.46608	9.54763	9.45055	9.63167	9.63529	9.72254	9.6718	9.73474	9.62284	9.56809
ENSG00000064042	5.70857	5.32712	4.62327	5.45451	5.22641	5.62976	5.23666	4.96997	5.08281	5.8082	5.50818	5.39844	5.99675	5.59598	5.62785	6.17801	5.64424	5.72073	6.87034	7.20922	6.74827
ENSG00000064102	8.36646	8.35978	8.38061	8.37436	8.29069	8.43136	8.31563	8.55028	8.31162	8.43212	8.39265	8.54065	8.4068	8.37286	8.42201	8.33826	8.34565	8.5142	8.41535	8.34941	8.44031
ENSG00000064115	11.0986	11.1268	11.1546	11.1243	11.0747	11.1795	11.1522	11.1054	11.168	10.9886	11.0065	11.1077	10.9882	10.8529	11.0041	10.7666	10.8234	10.8651	10.4784	10.3278	10.4446
ENSG00000064199	5.31408	5.93123	5.76856	5.20456	5.44328	5.56083	5.26505	5.2552	5.23055	5.19002	5.15464	5.79147	4.87845	5.27348	5.62785	5.62891	5.14198	5.50289	4.91985	4.67992	4.24032
ENSG00000064225	6.31863	6.33258	6.70452	6.37007	6.36417	6.29262	6.70559	6.34441	6.16297	6.69995	6.51192	6.86748	7.07105	6.86035	7.02454	7.22012	7.23353	7.46548	7.48214	7.45181	7.76547
ENSG00000064270	3.61584	1.85184	2.24292	2.58077	3.57667	3.35625	1.99866	3.43127	2.55401	3.74704	2.23553	2.03837	3.38839	3.41804	3.25546	4.21961	3.72828	3.73533	4.75587	5.36575	5.4872
ENSG00000064309	8.40956	8.38815	8.47446	8.6316	8.22193	8.52933	8.52667	8.48871	8.3923	8.63579	8.7525	8.67561	8.45715	8.66072	8.414	8.50506	8.59764	8.5142	8.25052	7.97874	8.14884
ENSG00000064313	9.48756	9.46003	9.73091	9.55722	9.52321	9.46036	9.66577	9.60747	9.6197	9.66428	9.69165	9.6545	9.7984	9.7173	9.53707	9.70856	9.78533	9.62455	9.96656	10.0174	10.0809
ENSG00000064393	11.6629	11.7615	11.7543	11.642	11.583	11.7103	11.6674	11.4891	11.6678	11.9215	11.796	11.8497	11.9403	11.962	11.7389	11.8273	11.915	11.8264	12.1186	12.1192	12.1826
ENSG00000064419	10.3016	10.3362	10.2505	10.2804	10.2858	10.2357	10.302	10.3022	10.2873	10.3634	10.3761	10.4289	10.5442	10.5493	10.4068	10.6684	10.7182	10.6161	10.8579	10.8919	10.8686
ENSG00000064490	8.70167	8.53747	8.65009	8.46259	8.49392	8.45054	8.5813	8.71726	8.61482	8.43212	8.67606	8.47286	8.4642	8.3961	8.67096	8.69502	8.61277	8.83274	8.68606	8.84031	8.75918
ENSG00000064545	9.97922	9.99073	9.91141	9.99215	9.91131	9.80953	9.92562	10.0841	9.99176	9.75005	9.85466	9.7171	9.7759	9.80846	9.97859	9.95654	9.86584	9.917	9.6843	9.65699	9.62643
ENSG00000064547	8.89983	8.8007	8.65009	8.71949	8.66771	8.63371	8.68472	8.76996	8.92792	8.87549	8.9673	8.91966	9.37504	9.40087	9.4921	9.84757	9.86584	9.76598	9.82026	9.84519	9.84575
ENSG00000064601	13.9726	14.0762	14.0011	13.9463	14.0622	14.0484	13.9005	14.1144	13.9858	13.8764	13.9799	13.9067	13.8666	13.8435	13.9723	13.9065	13.8528	13.9113	13.8363	13.8604	13.7527
ENSG00000064607	11.2276	11.3151	11.1781	11.0083	11.2111	11.2337	11.1711	10.8923	10.9587	11.396	11.1986	11.1877	11.2084	11.3328	11.1476	11.2528	11.2022	11.1417	11.2145	11.1566	11.1921
ENSG00000064651	9.69776	9.32859	9.55113	9.67972	9.28839	9.54533	9.63484	9.51013	9.79413	9.76632	9.83916	10.0275	9.6777	9.62	9.642	9.71311	9.9635	9.97936	9.87958	9.88457	9.99367
ENSG00000064652	8.84593	8.90648	9.08642	9.21172	9.10644	8.86217	9.13072	9.17362	9.10112	8.93426	8.99902	9.08564	9.16171	9.00706	9.03461	9.09453	9.18642	9.04275	9.28873	9.19988	9.25807
ENSG00000064666	12.3493	12.1252	12.1959	11.9826	12.0617	11.9922	11.932	12.2326	12.1565	12.2321	12.2563	12.2301	12.3168	12.2318	12.4308	12.5409	12.5148	12.5388	12.8202	12.8898	12.8405
ENSG00000064687	9.30558	9.50476	9.37575	9.18233	9.15643	9.1589	9.17252	9.24051	9.1265	9.44297	9.51031	9.31237	9.08373	9.18303	9.23213	8.93218	8.83549	8.99479	8.56739	8.62317	8.88468
ENSG00000064692	7.55005	7.09487	7.2321	6.80237	6.81687	6.92041	6.88087	6.94652	6.91145	7.36039	6.85785	7.41914	7.45772	7.01244	6.92654	6.94876	7.16948	7.03069	7.57529	7.40365	7.35659
ENSG00000064703	9.01246	9.01234	8.99789	9.09564	9.1191	8.98565	8.94585	9.18337	9.1265	9.20117	9.11294	9.1872	9.28631	9.27866	9.08343	9.3202	9.46013	9.33645	9.5384	9.38843	9.29142
ENSG00000064726	10.3822	10.582	10.5357	10.4441	10.4095	10.5207	10.5193	10.5502	10.5109	10.532	10.497	10.6494	10.6092	10.5136	10.511	10.6223	10.6123	10.5802	10.8099	10.767	10.7265
ENSG00000064787	9.04015	9.04478	8.92218	8.74317	8.93446	9.09024	8.67946	8.6415	8.67195	8.90518	8.83684	8.83383	8.8614	9.02506	8.8861	8.89259	8.50336	8.62937	8.07024	7.78825	8.10261
ENSG00000064886	1.80823	2.63673	1.80282	2.3179	1.77785	3.18359	1.99866	3.29405	3.72046	3.30397	1.79614	3.97839	2.81297	2.40767	3.39227	2.65288	2.56104	3.54545	3.10244	0.864807	1.88167
ENSG00000064932	10.086	10.0381	9.90205	9.89433	9.9276	9.89603	9.85269	9.99278	9.97614	10.168	10.1498	10.0232	10.2631	10.2497	10.2103	10.328	10.2688	10.2821	10.6429	10.7567	10.6288
ENSG00000064933	8.52185	8.38252	8.34792	8.42125	8.52754	8.67914	8.39803	8.40788	8.45374	8.55977	8.50984	8.48542	8.55618	8.46804	8.58077	8.59989	8.78027	8.58687	8.53402	8.52046	8.48424
ENSG00000064961	10.6516	10.6759	10.5089	10.4212	10.6586	10.4676	10.4615	10.6721	10.424	10.5746	10.5716	10.4257	10.4699	10.4846	10.5138	10.3852	10.3083	10.3463	10.098	10.1242	10.1439
ENSG00000064989	3.08855	3.94044	3.74901	4.38752	2.21529	3.89347	3.69879	1.56437	2.55401	3.1681	3.0736	2.03837	1.84122	1.05418	2.26299	0.911912	2.56104	2.09925	1.66366	1.79214	0.922201
ENSG00000064995	9.36153	9.45735	9.53185	9.54187	9.59747	9.54087	9.53786	9.59108	9.54638	9.34987	9.5513	9.36941	9.44087	9.44387	9.34602	9.40331	9.31965	9.42701	9.55928	9.46586	9.41004
ENSG00000064999	9.46985	9.3972	9.43919	9.13963	9.3701	9.43651	9.32183	9.39949	9.43146	9.64841	9.5513	9.4645	9.58208	9.7006	9.50159	9.64008	9.64518	9.50898	9.74389	9.66577	9.6825
ENSG00000065000	12.167	12.2691	12.0687	11.9829	12.1321	12.0868	11.8998	12.0909	12.0121	12.2406	12.2823	12.0667	12.1957	12.2813	12.2082	12.2742	12.1991	12.2363	12.4521	12.4974	12.4524
ENSG00000065029	10.1009	10.2258	10.0567	9.92423	10.0762	10.0151	9.73715	9.91007	9.83319	10.0961	10.0591	9.75522	9.96426	10.0192	10.0095	10.0792	10.0293	10.0403	9.90427	9.97562	9.91961
ENSG00000065054	10.2462	10.4921	10.3195	10.2286	10.2703	10.355	10.1731	10.3386	10.227	10.2523	10.2688	10.0677	10.167	10.0822	10.3679	9.98693	9.77729	10.0073	9.25329	9.27446	9.279
ENSG00000065057	8.31638	8.65421	8.14723	8.29876	8.04083	8.38227	8.20279	8.59478	8.39752	8.40593	8.25929	8.15273	8.36219	7.98862	8.4769	8.28625	7.94769	8.22449	7.16004	7.20922	7.48467
ENSG00000065060	10.4236	10.4169	10.499	10.4958	10.4018	10.4403	10.4638	10.3089	10.4582	10.6908	10.6723	10.6205	10.881	10.8394	10.5726	10.789	10.8714	10.8362	10.9068	10.8957	10.8994
ENSG00000065135	11.4283	11.3531	11.5461	11.4291	11.4025	11.4747	11.3943	11.5231	11.505	11.4652	11.4087	11.5931	11.5198	11.5786	11.4651	11.6247	11.6346	11.5297	11.9494	11.9529	11.8916
ENSG00000065150	11.3124	11.3218	11.4576	11.5385	11.3934	11.4481	11.4514	11.4119	11.4222	11.4992	11.4424	11.5575	11.51	11.5498	11.5315	11.6644	11.6813	11.6507	11.9505	11.9055	11.8714
ENSG00000065154	9.7469	10.1114	10.2101	10.3079	10.1795	10.2008	10.3408	10.0093	9.77821	9.79255	9.93339	10.0328	9.56905	9.48346	9.70082	9.87897	9.85188	9.75368	10.411	10.5714	10.4175
ENSG00000065183	9.39408	9.37469	9.38652	9.35253	9.45244	9.41714	9.48153	9.56149	9.50586	9.56971	9.55368	9.64053	9.81366	9.8393	9.62648	9.70247	9.75973	9.81283	9.86958	9.88957	9.90082
ENSG00000065243	10.4509	10.4483	10.581	10.6343	10.5657	10.5991	10.7382	10.513	10.7055	10.6177	10.5739	10.6445	10.6053	10.6552	10.3813	10.5831	10.61	10.5274	10.7494	10.7319	10.6562
ENSG00000065268	9.78218	9.73867	9.51967	9.71949	9.65945	9.5784	9.73335	9.90566	9.78021	9.58646	9.74875	9.52812	9.74294	9.70247	9.98266	9.86812	9.84164	9.80755	9.5572	9.66722	9.48584
ENSG00000065308	11.097	11.298	11.3502	11.3673	11.1827	11.3468	11.4579	11.1477	11.4229	11.1878	11.2383	11.2911	11.1867	11.2769	11.2085	11.1116	11.2201	11.0134	11.1305	11.0534	11.015
ENSG00000065320	6.31863	6.91936	6.01056	6.29881	6.46678	6.33452	6.17316	6.05692	6.06136	6.78369	6.72926	6.61647	6.66877	7.10561	7.23931	7.21156	7.54883	7.24891	7.98638	8.24785	7.83498
ENSG00000065325	6.15096	5.99165	6.41999	6.43797	5.76663	6.08737	6.23186	6.11918	6.58521	6.50224	6.25594	6.16396	6.22977	5.46146	5.80988	5.18037	5.46908	5.8289	5.8423	5.44946	5.86493
ENSG00000065328	3.61584	4.05811	4.20345	4.24316	4.06949	4.44571	4.30208	3.87797	3.72046	4.47917	3.44514	4.29623	4.83559	3.55648	3.93069	4.58014	4.24577	4.4283	4.10948	4.05318	4.60111
ENSG00000065357	6.40636	6.40101	6.50152	6.28043	6.44684	6.20498	6.23186	6.07797	6.28067	6.47371	6.43154	6.0836	6.37154	6.14925	6.13643	6.58805	6.54394	6.63729	6.26466	6.58867	6.98072
ENSG00000065361	12.1061	12.2629	12.1812	12.0973	12.2328	12.2821	11.994	11.9679	11.9584	12.1463	12.0912	12.0291	11.9074	11.8317	11.782	11.4388	11.3874	11.4272	10.5109	10.4581	10.715
ENSG00000065413	6.15096	6.02093	6.39887	6.18486	6.38528	6.41484	6.27436	6.59867	6.0348	6.5846	6.05597	6.63914	6.34122	6.64446	6.13643	6.04949	6.50554	6.51307	6.99819	6.9272	6.93923
ENSG00000065427	11.4125	11.3681	11.3687	11.2769	11.3777	11.3735	11.1791	11.433	11.3049	11.2438	11.3305	11.2969	11.3734	11.3987	11.4559	11.6028	11.4909	11.6672	11.6312	11.7304	11.6482
ENSG00000065457	7.95105	7.83312	7.8376	7.61704	7.57345	7.63315	7.70903	7.69706	7.69258	7.77128	7.85932	7.83207	7.90393	7.9133	7.95415	7.85775	7.86921	7.74494	7.68576	7.58116	7.76547
ENSG00000065485	11.5573	11.5938	11.5443	11.6	11.6357	11.6405	11.3095	11.5856	11.4495	11.3013	11.3395	11.4129	11.0909	10.9798	11.212	10.7805	10.7266	10.9351	10.5982	10.5644	10.6816
ENSG00000065491	8.40956	8.34827	8.39135	8.30786	8.29069	8.25167	8.58974	8.2865	8.56	8.45784	8.25929	8.4538	8.50922	8.36346	8.34824	8.6323	8.62476	8.53031	8.78155	8.7742	8.85988
ENSG00000065518	11.1661	11.0498	11.0302	11.254	11.1403	11.1845	11.1728	11.3418	11.2867	10.7183	10.9131	11.0299	10.9077	10.867	11.0299	10.995	10.9509	11.1211	10.8003	10.9213	10.9961
ENSG00000065526	10.3997	10.5089	10.2883	10.0256	10.2886	10.3371	10.0623	10.0578	9.94795	10.7222	10.4771	10.4117	10.6539	10.7654	10.4138	10.7348	10.6494	10.6519	11.2066	11.1519	11.1642
ENSG00000065534	11.4112	11.6173	11.5419	11.3787	11.5395	11.7147	11.3311	11.3656	11.3014	11.4903	11.4928	11.4333	11.3966	11.4289	11.2753	11.0343	10.988	10.9745	10.4122	10.2462	10.5344
ENSG00000065548	10.4727	10.3464	10.3265	10.3624	10.3901	10.4898	10.2515	10.4896	10.3041	10.4639	10.4027	10.4887	10.6669	10.578	10.6394	10.7717	10.6662	10.7425	11.0338	11.0842	11.1138
ENSG00000065559	10.5287	10.5102	10.575	10.5686	10.4551	10.5709	10.5127	10.4618	10.4854	10.4602	10.4365	10.6688	10.5215	10.5252	10.5175	10.5385	10.6792	10.6002	11.0143	10.95	10.8987
ENSG00000065600	6.74605	6.78926	6.9566	6.99501	6.59919	6.76054	6.84372	6.94652	6.78966	6.89548	7.23468	6.93316	7.08026	7.18246	6.91523	7.419	7.43766	7.67129	8.02892	8.13439	8.09791
ENSG00000065613	10.7977	10.7651	10.749	10.5117	10.8087	10.8354	10.5542	10.6927	10.5699	11.0049	10.9097	10.937	11.1352	11.1971	10.9504	11.3334	11.225	11.2108	12.2312	12.3464	12.0977
ENSG00000065615	7.55964	7.77414	7.66257	7.67447	7.45861	7.62473	7.92452	7.69706	8.0182	7.88399	7.87461	8.02516	7.79628	7.86082	7.84513	8.17624	7.94769	7.80445	8.64367	8.71059	8.61843
ENSG00000065618	3.46055	3.67166	4.20345	3.69579	3.57667	2.49067	4.18813	3.1424	3.42564	3.1681	3.86799	3.74753	3.70648	3.26489	3.63222	2.84213	3.19675	3.64351	3.6921	4.53416	3.93735
ENSG00000065621	5.67363	5.1791	5.35136	5.31702	5.27247	5.10843	5.42452	4.72504	5.13375	5.04241	5.20387	4.85651	5.21582	4.56117	5.17587	4.77853	4.8467	5.33694	4.28019	4.72541	4.43196
ENSG00000065665	8.20457	8.33667	8.3201	8.46259	8.42421	8.37224	8.65821	8.38694	8.50785	8.356	8.20591	8.457	8.21109	8.36346	8.496	8.519	8.43689	8.33134	8.29602	8.51075	8.31212
ENSG00000065675	5.06728	5.1791	5.83297	4.45463	5.12962	5.37254	4.64214	4.77747	4.85886	4.96252	5.34221	5.39844	5.54335	5.96262	5.24978	5.24886	5.26966	5.44967	5.39902	5.30712	4.88948
ENSG00000065717	7.39783	7.68548	7.18352	7.32591	7.27846	7.51967	7.22945	7.56161	7.56845	7.26371	7.33752	7.08123	6.88388	7.00036	7.33579	6.94876	6.92955	6.70699	6.13714	6.14554	5.77347
ENSG00000065802	9.64914	9.73205	9.64382	9.67269	9.63542	9.4931	9.68428	9.57266	9.68947	9.68153	9.68949	9.72109	9.70177	9.82225	9.85084	9.78551	9.82744	9.54273	9.95558	10.0265	9.81455
ENSG00000065809	12.3263	12.2237	12.457	12.5072	12.3781	12.3678	12.509	12.4274	12.5669	12.373	12.3153	12.5342	12.4557	12.4024	12.4213	12.4374	12.4951	12.5026	12.5932	12.5274	12.5831
ENSG00000065833	10.3439	10.3216	10.4878	10.6161	10.4897	10.4909	10.8013	10.6729	10.7108	10.767	10.7417	10.8625	11.3697	11.4378	11.3854	11.6993	11.7451	11.6325	11.8888	11.6746	11.8305
ENSG00000065882	10.2252	10.3807	10.204	10.1074	10.369	10.2134	9.99398	10.2728	10.1838	10.2492	10.2113	10.2324	10.3842	10.4551	10.4466	10.5955	10.5302	10.4974	10.7675	10.8882	10.7833
ENSG00000065883	10.6347	10.6515	10.6065	10.6271	10.5633	10.6957	10.6407	10.5198	10.5312	10.7447	10.7552	10.6907	10.758	10.8621	10.6437	10.7437	10.7711	10.7335	10.8537	10.9452	10.8686
ENSG00000065911	9.8522	9.53553	9.79698	9.73812	9.54683	9.61074	9.71803	9.87892	9.82739	10.0761	9.9605	10.0058	10.357	10.27	10.3162	10.8224	10.8676	10.7767	11.7117	11.6862	11.5465
ENSG00000065923	9.57298	9.54564	9.62347	9.55148	9.41443	9.50232	9.59347	9.51207	9.55809	9.6627	9.61411	9.60786	9.61888	9.60012	9.50536	9.65908	9.71134	9.56479	9.49787	9.52494	9.57994
ENSG00000065970	8.86928	9.00136	8.87707	8.87456	8.86475	9.03413	9.02888	8.83325	8.97408	9.00576	8.93121	8.97862	9.05132	8.95794	8.81181	8.97578	8.97083	8.93068	9.08781	8.98058	8.93039
ENSG00000065978	13.2896	13.2813	13.2172	13.1498	13.2222	13.2638	13.046	13.3697	13.1813	13.1372	13.2283	13.1914	13.2689	13.2336	13.3728	13.4699	13.36	13.4447	13.6953	13.805	13.6791
ENSG00000065989	5.60112	5.46135	5.47761	4.90202	5.40244	4.10193	5.65646	5.2552	4.44021	5.47553	5.54685	5.16844	5.54335	5.62774	5.32007	5.95014	5.59633	5.69809	6.65445	6.84715	6.6994
ENSG00000066027	10.7752	10.7532	10.8824	10.7788	10.8301	10.791	10.8979	10.8121	10.841	10.7039	10.7365	10.7242	10.5648	10.4814	10.5708	10.5748	10.6749	10.5971	10.4707	10.5745	10.4992
ENSG00000066032	8.39354	8.56755	8.79861	8.31239	8.93446	9.03731	8.39482	8.74055	8.51747	8.47953	8.27088	8.25901	7.79068	7.62941	7.79664	7.43379	7.30979	7.40386	6.74472	6.77327	6.79553
ENSG00000066044	10.8563	10.9072	10.8928	10.9907	10.8662	10.8336	11.0469	10.9816	10.9815	10.9373	11.0004	11.0278	11.0446	10.9981	10.9484	11.0995	11.0648	11.1354	11.1058	11.07	11.1495
ENSG00000066084	10.5336	10.5115	10.7374	10.6451	10.4762	10.6477	10.7464	10.5159	10.6388	10.6665	10.647	10.7102	10.5599	10.6724	10.5006	10.6102	10.8383	10.6123	11.1374	11.2101	11.1097
ENSG00000066117	10.303	10.2554	10.2416	10.1711	10.1335	10.1326	10.3241	10.2521	10.2703	10.2917	10.3599	10.2407	10.336	10.3917	10.371	10.5847	10.6085	10.5433	10.7191	10.7423	10.6957
ENSG00000066135	10.675	10.6184	10.7769	10.5958	10.679	10.6724	10.4461	10.5236	10.5548	10.75	10.6635	10.7003	10.6219	10.6951	10.6316	10.5221	10.5777	10.5607	10.3362	10.4023	10.4511
ENSG00000066136	10.2566	10.2949	10.2637	10.1873	10.3396	10.278	10.1543	10.3375	10.2859	10.1456	10.187	10.128	9.99258	9.98435	10.201	9.95012	9.9421	9.98404	9.82026	9.72015	9.57657
ENSG00000066185	4.89601	5.12619	5.43674	5.66749	5.63178	5.56083	5.34698	5.52425	5.77081	4.96252	5.62122	5.25904	4.65014	5.19085	5.2133	4.86835	5.17497	5.08102	3.91583	4.53416	3.55337
ENSG00000066230	5.92335	6.1179	6.35962	6.39163	6.38926	6.48368	6.24559	6.39344	5.77723	6.17031	5.77865	6.3815	6.13662	6.17312	6.47288	5.81209	5.91853	5.79942	5.31154	5.55124	5.89324
ENSG00000066248	9.52479	9.74087	9.71817	9.50277	9.70845	9.72345	9.43545	9.7189	9.59491	9.39242	9.42724	9.39793	9.06065	8.91996	9.1573	8.42592	8.32375	8.29408	7.45565	7.35383	7.24185
ENSG00000066279	6.93491	6.62732	7.09436	6.68152	6.59919	6.82074	7.01225	6.78945	6.70797	7.05806	7.1618	7.43218	7.0241	7.12799	6.4966	6.32802	6.1214	6.53879	6.13714	6.44651	6.6097
ENSG00000066322	10.9641	11.023	11.0184	11.0884	10.9833	10.8571	11.0926	11.1827	11.1771	10.8211	10.9299	10.9787	10.8954	10.8512	11.0821	11.1708	11.1967	11.2208	11.4122	11.4231	11.3611
ENSG00000066379	7.73932	7.70365	7.41154	7.6532	7.58262	7.46413	7.5335	7.71733	7.61402	7.41394	7.41273	7.20794	7.48571	7.31517	7.68119	7.71372	7.52982	7.57517	7.74529	7.94067	7.50613
ENSG00000066382	3.08855	3.51582	4.10255	4.58014	4.35285	4.52022	4.24623	4.21857	4.44021	4.00806	3.44514	4.45797	4.3178	4.27062	3.93069	3.99875	4.11585	3.73533	3.91583	3.98	3.65936
ENSG00000066405	6.7793	6.66491	6.82026	6.62437	6.48646	6.61512	6.30202	6.19823	6.83655	6.78369	6.91809	6.9423	6.72856	6.56467	6.97092	7.1943	7.39628	7.31736	7.70837	7.93585	7.73549
ENSG00000066422	9.36427	9.37753	9.48251	9.55722	9.3271	9.40244	9.4556	9.25445	9.46417	9.59145	9.49802	9.55519	9.57558	9.43717	9.2022	9.34388	9.50786	9.33645	9.46726	9.4625	9.43077
ENSG00000066427	8.52675	8.87074	8.80665	8.99779	8.72681	9.06868	9.02266	8.90864	8.79575	8.80567	8.86389	8.81901	8.94947	8.97963	8.71402	8.77848	8.89364	8.78519	8.9897	9.01074	8.87371
ENSG00000066455	10.8007	10.8684	10.8409	10.7092	10.8397	10.9884	10.56	10.8114	10.6617	10.8739	10.8138	10.8191	10.7737	10.7823	10.6842	10.6077	10.5278	10.6009	10.6073	10.6339	10.6165
ENSG00000066468	9.52234	9.00136	9.23981	9.1699	9.03475	9.15013	9.30996	9.12892	9.34492	9.44664	9.36368	9.52356	9.16388	8.97963	9.15969	8.52246	8.79627	8.9331	7.94889	7.8148	8.17588
ENSG00000066557	9.749	9.61929	9.84658	9.92275	9.7879	9.90126	9.98228	9.76993	10.0276	9.77365	9.88138	10.021	9.78438	9.80672	9.77622	9.78839	9.91428	9.86585	9.75841	9.7521	9.81024
ENSG00000066583	10.2462	10.475	10.5199	10.4554	10.5494	10.551	10.6582	10.5661	10.6971	10.3827	10.3947	10.469	10.3861	10.2356	10.3365	10.0459	10.2083	10.262	9.95242	10.0423	9.9156
ENSG00000066629	8.40424	8.22786	8.5338	8.54187	8.47926	8.32625	8.38839	8.5275	8.33902	8.30021	8.48516	8.61686	8.63641	8.40529	8.46531	8.48035	8.54181	8.52066	8.41992	8.33113	8.46975
ENSG00000066651	8.02221	7.88182	8.11521	8.08774	7.90121	8.12607	8.21739	8.18342	8.22029	8.13694	8.15676	8.19159	8.43578	8.15041	8.2571	8.48391	8.66015	8.60828	8.76727	8.64405	8.76513
ENSG00000066654	9.8522	9.87922	9.80102	9.90786	9.88931	10.0564	9.98867	9.96761	9.86369	9.97029	9.91503	10.0791	9.86918	9.83421	9.89469	9.8211	9.83521	9.79827	9.95558	9.87072	9.81024
ENSG00000066697	9.80051	9.53806	9.52942	9.5244	9.58383	9.50462	9.46786	9.70868	9.63083	9.75599	9.67429	9.82485	10.258	10.1452	10.181	10.8167	10.7397	10.6939	11.4596	11.5635	11.4189
ENSG00000066739	10.1446	10.2585	10.5321	10.5146	10.29	10.3915	10.5082	10.2486	10.364	10.2825	10.3435	10.4085	10.1958	10.242	10.1009	10.041	10.0997	9.99453	10.0589	10.1326	10.1162
ENSG00000066777	10.8178	10.7134	10.9125	10.8622	10.8406	10.8022	10.826	10.6884	10.8042	10.9142	10.8481	10.9787	11.025	10.9882	10.8033	10.9999	11.1466	10.8977	11.356	11.3605	11.3399
ENSG00000066813	10.6648	10.9943	10.8514	10.756	11.0106	11.0636	10.718	10.6581	10.5651	10.5716	10.4914	10.5229	9.66069	9.502	10.0182	8.99083	8.88741	9.07045	7.6734	7.52624	7.93376
ENSG00000066827	7.96557	7.82484	7.58988	7.39588	7.60979	7.63315	7.41185	7.4038	7.54982	7.66803	7.72244	7.72489	7.68599	7.74252	7.61282	7.97864	7.49758	7.61197	7.80944	7.84087	7.89588
ENSG00000066855	10.1839	10.3083	10.2578	10.4212	10.3597	10.3878	10.4211	10.4171	10.5073	10.317	10.3031	10.3288	10.2137	10.137	10.3075	10.1648	10.2103	10.2925	10.2876	10.2647	10.3036
ENSG00000066923	3.76003	3.51911	3.29259	3.51771	3.98237	4.12217	3.29302	3.44171	4.27302	4.09381	4.20526	3.74418	3.95178	3.83421	4.06776	2.86325	3.45819	3.5626	3.11693	3.35577	2.72892
ENSG00000066926	10.2771	10.3348	10.3542	10.3733	10.4198	10.3702	10.4414	10.4171	10.5193	10.4234	10.4608	10.4523	10.7658	10.7681	10.6834	10.8619	10.9287	10.8644	10.7311	10.6895	10.7611
ENSG00000066933	8.15478	8.37687	8.51429	8.30786	8.10588	8.18452	8.32577	8.15398	8.33358	8.36767	8.34407	8.1128	8.36972	8.62183	8.28812	8.98585	8.96613	8.62638	9.59814	9.65258	9.35392
ENSG00000067057	8.51199	8.11016	8.23327	8.02841	8.11855	8.19593	8.0923	8.5727	8.04507	8.66132	8.62275	8.61686	9.05833	9.02208	8.84199	9.93721	9.92523	9.69056	11.4356	11.6933	11.3051
ENSG00000067064	14.0031	14.227	14.3372	14.3463	14.3688	14.4562	14.3164	14.3606	14.2399	13.9863	14.0895	14.1789	13.8237	13.8362	13.8714	13.6867	13.6491	13.6998	13.462	13.3539	13.4525
ENSG00000067066	9.94301	10.1665	10.009	9.93455	10.0925	10.0812	9.80619	9.95142	9.87487	10.0473	9.88353	10.0076	10.0904	10.018	9.90902	9.89385	9.96254	9.95726	10.07	10.0331	10.025
ENSG00000067082	12.8368	12.711	12.7946	12.8715	12.7327	12.7293	12.876	12.8137	12.8785	12.9522	12.928	12.9657	13.0657	13.1364	12.9894	13.3656	13.4683	13.2792	13.9581	14.0082	13.8296
ENSG00000067113	10.127	10.0073	9.95908	10.1022	10.0648	10.0423	10.0161	10.1894	10.1793	9.83943	9.98006	10.0729	9.97541	10.0162	10.1109	10.0483	10.0528	10.0868	10.0308	10.0139	10.1665
ENSG00000067141	9.67365	9.65942	9.83286	9.6674	9.6442	9.661	9.63212	9.37631	9.68093	9.83803	9.87949	9.8396	9.90848	10.0576	9.735	9.98568	9.99849	10.0256	10.0618	9.97797	9.90082
ENSG00000067167	12.5579	12.5268	12.7336	12.7896	12.5655	12.6723	12.8239	12.8007	12.882	12.6396	12.6114	12.8593	12.6733	12.5841	12.6662	12.7216	12.7256	12.6668	12.7922	12.7465	12.6768
ENSG00000067177	7.62757	7.5473	7.61757	7.394	7.60979	7.84366	7.66365	7.45902	7.71784	7.90957	7.87916	7.83276	7.80853	7.98862	7.64056	8.28494	8.31969	7.94666	9.16245	9.22068	8.96813
ENSG00000067182	10.8928	10.793	10.8002	10.7246	10.754	10.8189	10.73	10.9781	10.8091	10.8407	10.966	10.7858	11.0004	10.9233	11.0508	11.3466	11.2994	11.2905	11.8367	11.8928	11.7626
ENSG00000067191	4.89601	4.68881	4.76207	4.31715	4.43615	4.00146	3.99832	4.29249	4.35689	4.64189	4.87962	4.29623	4.65014	4.74616	5.17587	5.752	5.44222	5.62795	6.30478	6.55127	6.10895
ENSG00000067208	9.51249	9.33444	9.32346	9.43792	9.26009	9.36502	9.3618	9.28871	9.29823	9.57139	9.57488	9.57884	9.59338	9.55747	9.39366	9.5732	9.63632	9.51708	9.89115	9.7369	9.82597
ENSG00000067221	8.83016	8.70471	8.66786	8.63883	8.6284	8.59975	8.65285	8.9057	8.6193	8.67391	8.71902	8.68925	8.75903	8.6911	8.7399	8.93738	8.75322	8.95476	8.70866	9.00614	8.61514
ENSG00000067225	11.8671	11.4745	11.5781	11.6009	11.4546	11.4624	11.6157	11.8363	11.7229	11.9519	11.7934	11.8987	11.8806	11.8283	11.9785	12.3967	12.4089	12.4695	13.3069	13.4295	13.3778
ENSG00000067248	10.1382	10.2676	10.2897	10.0784	10.2271	10.3853	10.0481	10.1327	9.94081	10.2907	10.1545	10.305	10.2519	10.0936	10.0188	9.91235	9.8734	9.89228	9.6824	9.63332	9.73799
ENSG00000067334	10.1254	10.0629	9.95185	9.93014	10.1382	10.1993	9.78816	10.1414	9.93544	10.1934	10.184	10.2416	10.3196	10.4639	10.3097	10.6947	10.6024	10.6341	11.5012	11.5077	11.4357
ENSG00000067365	8.93344	9.03763	8.9073	8.87762	8.78755	8.93207	8.88086	9.05386	8.83091	8.90785	8.92389	8.71882	9.01336	9.05457	9.04503	9.25092	9.17831	9.16955	9.32576	9.35807	9.22176
ENSG00000067369	9.75945	9.74965	9.70533	9.43584	9.57467	9.68954	9.6362	9.43052	9.62638	9.86437	9.8508	9.70372	9.79979	9.81364	9.66582	9.8225	9.75837	9.76325	10.2078	10.1263	10.1127
ENSG00000067445	9.65667	9.7187	9.56541	9.53413	9.61545	9.52964	9.34694	9.59108	9.49373	9.61776	9.57722	9.4645	9.37691	9.55747	9.64543	9.40143	9.46514	9.44412	9.49787	9.46753	9.4966
ENSG00000067533	8.589	8.45404	8.70275	8.66031	8.6763	8.74276	8.69518	8.68674	8.86146	8.88094	8.84462	8.81155	8.98177	8.99189	8.90909	9.31022	9.13913	9.28989	9.42238	9.45408	9.50906
ENSG00000067560	13.0196	13.0433	13.1571	13.2287	13.0835	13.1339	13.2553	13.2574	13.2817	12.9783	13.0213	13.1247	12.9881	12.9932	13.1046	13.0896	13.0972	13.1041	13.1869	13.1913	13.1575
ENSG00000067596	9.65586	9.65942	9.821	9.63522	9.75988	9.81324	9.56665	9.77477	9.57431	9.77804	9.84305	9.7604	9.80397	9.8308	9.78712	9.80413	9.77997	9.76461	10.0051	9.9459	10.01
ENSG00000067606	10.3997	10.3636	10.3747	10.202	10.3809	10.3203	10.2291	10.4213	10.3452	10.2845	10.4301	10.2564	10.3128	10.2986	10.3936	10.4915	10.4963	10.4642	10.9588	11.0315	10.9302
ENSG00000067704	11.4283	11.4356	11.5646	11.6225	11.5389	11.5444	11.5545	11.5478	11.5098	11.4524	11.4399	11.5267	11.4593	11.4158	11.3787	11.3689	11.3741	11.462	11.2496	11.251	11.2825
ENSG00000067715	5.12014	5.32712	5.43674	5.45451	5.3604	5.66303	5.14801	5.58434	4.85886	5.32393	5.62122	5.66463	5.43266	4.49383	5.51249	4.82414	5.10821	5.69809	5.15749	5.246	4.9324
ENSG00000067798	6.40636	6.35576	6.09178	6.35258	6.34274	6.39518	5.7796	5.75092	6.11306	6.42982	5.58451	6.25483	6.12688	6.08206	6.03557	5.49431	5.86251	5.76498	6.40046	6.21096	6.38094
ENSG00000067829	9.22644	9.33152	9.24574	9.04482	9.28839	9.16762	9.04942	9.22879	9.31764	9.08099	9.18826	9.07737	8.9719	8.86439	9.29675	9.0592	9.11808	9.1129	8.9074	9.0846	9.12795
ENSG00000067836	9.96846	10.0856	9.91327	9.67972	9.86321	9.89077	9.76101	10.0148	9.83895	9.69395	9.86234	9.61073	9.57721	9.67042	9.86732	9.69174	9.64959	9.64424	9.21695	9.28779	9.33205
ENSG00000067900	11.175	11.1695	11.1443	11.0373	11.2465	11.3148	11.0185	11.104	10.9953	11.3493	11.2012	11.3048	11.2998	11.2553	11.1371	11.2283	11.1514	11.1308	11.4351	11.463	11.4072
ENSG00000067955	9.53212	9.28701	9.46229	9.42333	9.30233	9.35995	9.58646	9.53699	9.49129	9.73811	9.46559	9.60642	9.77732	9.73016	9.5967	9.88167	9.91794	9.85694	10.3879	10.5597	10.4372
ENSG00000067992	9.82857	10.0327	10.2207	10.219	10.05	10.0828	10.3599	9.8532	10.095	10.0558	10.084	10.1099	9.84777	10.0267	9.79176	9.41267	9.53034	9.35104	8.74921	8.69353	8.83182
ENSG00000068001	10.2887	10.2116	10.121	10.1074	10.1735	10.0874	10.0883	10.3022	10.1762	10.1008	10.3517	10.1028	10.303	10.5061	10.6046	10.6832	10.6509	10.5724	10.4773	10.4732	10.4694
ENSG00000068024	8.34995	8.42695	8.58613	8.35693	8.31291	8.47885	8.48203	8.37848	8.41821	8.7353	8.54847	8.53159	8.95448	8.98577	8.75266	9.01318	8.89364	8.86359	8.90088	8.94976	8.93039
ENSG00000068028	9.01595	8.71818	8.68977	8.65676	8.63723	8.60404	8.53252	8.80195	8.61033	8.74428	8.87913	8.82644	9.03956	8.97037	9.00291	9.09453	9.17831	9.25541	9.6399	9.72576	9.6133
ENSG00000068078	11.4766	11.483	11.3295	11.2896	11.4231	11.3079	11.2491	11.2779	11.2923	11.3702	11.4641	11.3124	11.3195	11.3929	11.3585	11.082	11.0866	11.0112	10.2572	10.0931	10.2622
ENSG00000068079	8.59835	8.78798	8.52408	8.73981	8.75952	8.83323	8.51194	8.64503	8.59223	8.43952	8.50002	8.40834	8.52279	8.28596	8.68101	8.26573	8.05793	8.24806	7.52523	7.59348	7.56187
ENSG00000068097	8.64418	8.65421	8.72414	8.65319	8.66771	8.75824	8.60647	8.70378	8.53653	8.97555	8.64965	8.75039	8.72421	8.62183	8.61962	8.48035	8.36007	8.61736	8.34012	8.2595	8.395
ENSG00000068120	11.0552	11.1502	10.942	10.9722	11.1865	11.0651	10.894	11.1105	11.0684	10.9993	11.0651	10.9444	11.0481	10.9859	11.212	11.0773	10.9804	11.0424	10.9382	10.8882	10.9142
ENSG00000068137	8.93713	9.07651	8.88089	8.83733	8.94516	8.97575	8.80073	8.88792	8.78782	8.94989	8.97086	8.74518	8.65809	8.60995	8.64038	8.06666	8.10578	8.13881	7.24498	7.17684	7.48467
ENSG00000068305	10.5649	10.5333	10.6541	10.7549	10.6542	10.6806	10.6414	10.5493	10.6232	10.6547	10.7217	10.7156	10.6116	10.6131	10.5517	10.6069	10.7589	10.6032	11.0316	10.9959	10.9229
ENSG00000068308	11.3688	11.4692	11.335	11.3056	11.3947	11.3953	11.2026	11.4151	11.3014	11.3109	11.4308	11.3014	11.3176	11.3489	11.4786	11.5055	11.4544	11.4306	11.6532	11.6564	11.5641
ENSG00000068323	11.8144	11.8416	11.6714	11.6415	11.715	11.6189	11.7025	11.7306	11.7649	11.9641	11.8887	11.8255	12.1904	12.3076	12.2323	12.6788	12.6294	12.4853	13.1421	13.1603	13.0596
ENSG00000068354	9.3779	9.24087	9.21872	9.27342	9.18381	9.1589	9.21292	9.32126	9.12019	9.20308	9.30552	9.26746	9.26214	9.09099	9.28087	9.21454	9.40731	9.32164	9.51934	9.45523	9.43414
ENSG00000068366	15.5094	15.7233	15.852	15.8717	15.7703	15.9067	15.8504	15.734	15.8659	15.5793	15.5554	15.7868	15.189	15.1279	15.2198	14.7471	14.8698	14.8535	14.4844	14.2772	14.4654
ENSG00000068383	10.4676	10.4986	10.3515	10.4118	10.5055	10.4593	10.4926	10.5436	10.4532	10.4765	10.4158	10.4682	10.5706	10.5596	10.511	10.5814	10.4733	10.6266	10.6212	10.6369	10.5756
ENSG00000068394	8.99133	8.85456	8.71562	8.64244	8.95226	8.91835	8.65554	8.73062	8.92792	8.93949	8.79729	8.8726	8.90351	8.79266	8.97594	8.93218	8.95192	9.00405	9.0529	9.01074	9.06425
ENSG00000068400	10.8699	10.9257	10.6214	10.5018	10.8671	10.7768	10.6278	10.7105	10.5372	10.9281	10.8596	10.6784	10.8375	11.0027	10.9274	10.9539	10.8396	10.7814	11.0226	11.0733	11.0707
ENSG00000068438	8.81821	8.78372	8.68541	8.74987	8.84202	8.6504	8.70039	8.83325	8.77985	8.74727	8.81324	8.91966	8.89571	8.86439	8.96775	8.96818	9.08156	8.94036	9.005	9.12759	9.05457
ENSG00000068489	5.80856	5.50346	5.39468	5.2805	5.70078	4.65861	5.29288	5.05738	5.13375	5.68915	5.38553	5.42477	5.14737	5.31309	5.17587	4.9529	5.07363	5.00926	4.81262	4.72541	4.79961
ENSG00000068615	7.49107	7.70365	7.85322	7.89585	7.84897	7.99504	8.02751	7.80202	8.06489	7.66803	7.77225	7.76666	7.62437	7.65275	7.69448	7.96344	7.83865	7.49862	8.12729	8.38528	8.04021
ENSG00000068650	11.283	11.3429	11.2513	11.2623	11.2243	11.2393	11.2602	11.1668	11.3944	11.4742	11.4418	11.4059	11.5151	11.5462	11.4058	11.5722	11.7041	11.4654	11.7247	11.6898	11.6574
ENSG00000068654	10.4327	10.4947	10.3692	10.1048	10.4018	10.3397	10.1964	10.1954	10.2445	10.6379	10.5227	10.4289	10.7997	10.904	10.5833	10.7008	10.728	10.5678	10.7154	10.6487	10.6714
ENSG00000068697	12.315	12.271	12.4729	12.5351	12.3485	12.3993	12.6136	12.5464	12.5853	12.2588	12.2654	12.4277	12.3185	12.2047	12.2388	12.2005	12.2086	12.3313	12.2112	12.199	12.1964
ENSG00000068724	9.22342	9.44119	9.35122	9.25707	9.39374	9.10847	9.27201	9.18579	9.22963	9.26916	9.35825	9.1561	9.29623	9.38004	9.34391	9.36138	9.28983	9.20009	9.02615	9.08242	8.97982
ENSG00000068745	11.6136	11.5772	11.4816	11.5356	11.4953	11.4143	11.4913	11.5408	11.602	11.4382	11.4653	11.3447	11.3626	11.3298	11.4298	11.2888	11.2514	11.2787	10.9011	10.9191	11.0403
ENSG00000068784	8.00825	8.07569	8.1022	8.16991	7.97967	8.34175	7.77958	7.95211	8.02497	8.10938	8.18768	8.3648	8.11579	8.0308	8.20696	8.14063	7.90898	8.09182	8.03489	7.85629	8.17141
ENSG00000068796	8.93344	8.86267	8.99085	8.85296	8.87971	9.02136	8.86935	8.8669	8.91705	9.03291	8.96373	9.30884	9.26224	9.18036	8.97049	9.40893	9.34705	9.34011	9.90264	9.88331	9.82027
ENSG00000068878	10.8737	10.7845	10.9869	10.9844	10.9331	10.9893	11.007	10.8524	11.0116	11.1455	10.9943	11.1873	11.237	11.3085	11.1367	11.4768	11.5913	11.3835	12.0075	12.0661	11.9628
ENSG00000068885	8.63058	8.71034	8.47512	8.64961	8.7756	8.85499	8.55706	8.41538	8.33473	8.82274	8.63245	8.66648	8.43331	8.38369	8.38083	8.25815	8.29911	8.24806	8.17201	7.93197	7.9491
ENSG00000068903	10.5553	10.6632	10.6893	10.5273	10.5645	10.6109	10.4911	10.5379	10.4988	10.5155	10.5902	10.4273	10.5316	10.4032	10.5306	10.4069	10.3595	10.3353	10.1879	10.2276	10.1932
ENSG00000068912	10.3849	10.3736	10.4134	10.5591	10.4564	10.4258	10.4653	10.5455	10.3719	10.4103	10.4506	10.4224	10.2701	10.1643	10.2681	10.0204	10.2142	10.1084	10.1498	10.1834	10.2162
ENSG00000068971	9.36153	9.33735	8.97666	9.09037	9.36479	9.28714	9.10543	9.38267	9.37963	9.28567	9.31129	9.35578	9.46216	9.47476	9.52224	9.54624	9.41768	9.45598	9.46505	9.36886	9.22392
ENSG00000068976	4.21062	2.63673	2.24292	3.16545	4.17025	4.19585	3.7797	3.67184	3.05467	3.54245	2.84444	2.99866	3.88525	1.05418	3.73872	3.29504	3.81457	1.79229	3.42719	3.73514	3.3147
ENSG00000069011	5.12014	5.07125	4.54851	4.51875	5.07868	4.36713	4.64214	4.42985	4.35689	4.53547	5.10367	4.29623	5.21582	5.00988	5.24978	5.21502	5.2999	5.3944	5.01965	6.09444	5.95094
ENSG00000069020	9.61271	9.53553	9.32346	9.38084	9.4424	9.43891	9.17812	9.20745	9.36904	9.65953	9.46054	9.59342	9.52252	9.65317	9.51289	9.48189	9.4551	9.51385	9.74753	9.72576	9.6919
ENSG00000069188	7.38709	6.96528	7.29061	6.91387	7.34464	7.23995	6.88087	7.15903	6.75754	7.78876	7.77225	7.35212	7.62437	7.92613	7.36933	7.94291	7.82312	7.8359	8.32069	8.36746	8.35218
ENSG00000069248	10.049	10.0804	10.3139	10.231	10.1459	10.3281	10.2917	10.2876	10.2255	10.2439	10.1514	10.2108	10.2293	10.1562	10.0135	9.99069	10.2063	10.0692	10.0051	10.0288	9.96553
ENSG00000069275	12.4693	12.5602	12.6107	12.6236	12.4996	12.6363	12.6127	12.5284	12.6184	12.5091	12.4319	12.5992	12.2436	12.2418	12.1816	11.8498	11.9586	12.003	11.6682	11.5721	11.6606
ENSG00000069329	11.5745	11.5574	11.6921	11.8075	11.6775	11.6612	11.819	11.7796	11.8121	11.7134	11.735	11.8533	11.8361	11.8562	11.7309	11.9493	12.0358	11.9453	12.127	12.1229	12.1426
ENSG00000069345	10.7387	10.6782	10.8062	10.8143	10.6971	10.7577	10.8419	10.9348	10.9481	10.804	10.8354	10.8571	11.1028	11.1412	11.1244	11.3727	11.3327	11.3516	11.4635	11.5081	11.5199
ENSG00000069399	9.61271	9.57061	9.33463	9.1848	9.45244	9.46508	9.25619	9.47087	9.44665	9.55956	9.45546	9.45175	9.5998	9.59209	9.74621	9.91367	9.81833	9.77141	9.8862	9.81526	9.87355
ENSG00000069424	5.01242	5.23015	5.11278	4.94932	5.44328	5.00843	5.17817	5.09917	5.18296	5.15451	5.46844	4.64879	5.59566	4.68709	4.92832	4.58014	5.20723	5.33694	5.54015	5.08082	5.23631
ENSG00000069482	3.61584	4.16691	4.20345	4.38752	3.42178	4.19585	4.35585	4.67064	4.97518	3.64837	3.98526	4.69279	4.74584	4.27062	3.63222	5.46582	5.73555	5.92952	7.75256	7.90652	7.44816
ENSG00000069493	8.08384	8.04914	7.92486	7.89652	7.81459	7.80797	7.89249	7.85683	7.29941	7.96505	7.68696	7.5253	7.81527	7.81445	7.53566	7.64021	7.55986	7.3067	7.52072	7.4741	7.49064
ENSG00000069509	8.34441	8.08958	8.09565	8.25708	8.44447	8.20725	8.30542	8.33103	8.11646	7.9631	8.25929	8.2987	8.30442	8.10036	8.16461	8.14513	7.9572	8.22052	8.08759	8.10027	8.26252
ENSG00000069535	12.2874	12.5487	12.4995	12.4621	12.5862	12.5781	12.4272	12.5221	12.3787	12.3457	12.3766	12.3249	12.2232	12.2185	12.232	11.9506	11.8916	11.8998	11.1256	10.9422	11.0452
ENSG00000069667	9.14907	9.43305	9.52456	9.53607	9.40928	9.48847	9.54944	9.38267	9.66803	9.41885	9.41684	9.39294	9.32169	9.10056	9.09601	9.0758	9.17627	9.07825	9.40403	9.62884	9.46954
ENSG00000069696	5.01242	4.36262	4.38627	4.51875	5.12962	4.19585	5.08573	3.87797	4.79699	4.22901	5.15464	3.97839	4.99989	5.38918	3.73872	3.63923	4.36495	3.32673	4.50347	2.92006	3.93735
ENSG00000069702	6.36316	6.40101	6.33358	6.62437	6.65242	6.47228	6.64209	6.68354	6.49067	6.55767	6.66039	6.65034	6.37154	6.59712	6.708	6.21272	6.05205	5.80791	5.63762	5.42209	5.23631
ENSG00000069812	4.55577	4.05811	4.38627	3.99528	4.26444	4.10193	3.99832	4.77747	4.73235	4.74099	4.19458	4.55653	3.88525	4.8029	4.68365	5.43675	5.07363	4.93375	5.43562	6.12871	6.0517
ENSG00000069849	10.1042	9.8138	10.0851	10.1358	9.98751	10.0168	10.1476	10.2086	10.046	9.9341	10.0872	10.1753	10.1441	10.0793	10.1787	10.523	10.414	10.4363	10.9983	11.0623	11.1068
ENSG00000069869	10.2417	10.1249	10.3082	10.2069	10.3054	10.4222	10.2874	10.3441	10.3193	10.5023	10.4066	10.4949	10.6029	10.6201	10.3617	10.6424	10.7363	10.6334	10.7818	10.7892	10.7723
ENSG00000069943	7.85297	7.39245	7.82182	7.76317	7.75476	7.65811	8.00244	7.66263	8.0317	7.61021	7.43351	7.70354	7.71584	7.46333	7.47325	7.43379	7.76471	7.68863	7.20313	7.40365	7.28388
ENSG00000069956	12.0775	12.0984	12.2299	12.3381	12.2573	12.2602	12.3367	12.2428	12.274	12.2462	12.1934	12.3954	12.36	12.3331	12.3228	12.4806	12.5441	12.4797	12.9299	12.9228	12.8056
ENSG00000069966	9.26215	9.37753	9.36217	9.32813	9.43229	9.36754	9.55088	9.37418	9.31212	9.26916	9.31969	9.35578	9.38064	9.4616	9.3418	9.49957	9.48172	9.25153	9.6881	9.83095	9.71973
ENSG00000069974	9.31564	9.48438	9.41849	9.49454	9.4067	9.52765	9.31984	9.41484	9.45027	9.42901	9.35351	9.55851	9.21004	9.18084	9.18927	9.2682	9.25785	9.30332	9.84265	9.91951	9.83741
ENSG00000069998	8.99133	9.04121	9.05639	8.89886	9.04474	8.87996	8.86008	9.16626	9.11069	9.00825	9.05375	8.9697	9.13766	9.23293	9.22299	9.33209	9.23808	9.31986	9.3571	9.11269	9.23896
ENSG00000070010	10.8928	10.8745	10.9004	10.7967	10.8996	10.9451	10.7794	10.976	10.8639	10.8068	10.8891	10.8516	10.8947	10.9844	10.853	10.9397	10.7335	10.8853	10.7782	10.863	10.8817
ENSG00000070018	10.6358	10.7212	10.9529	10.9079	10.7201	10.8003	11.0268	10.7536	10.7992	10.8698	10.929	10.8721	10.8011	10.8562	10.7049	10.558	10.6734	10.5209	10.2534	10.1178	10.2684
ENSG00000070019	3.88379	4.36262	4.94805	4.6956	4.51491	4.59107	4.35585	5.05738	5.52582	4.53547	4.61427	4.23802	3.60804	4.09998	4.78655	3.73785	3.89599	4.25298	2.68268	2.09909	2.86097
ENSG00000070047	11.1344	11.2883	10.994	10.7698	11.2081	11.1497	10.8484	10.9239	10.7744	11.2731	11.2812	11.0051	11.321	11.5195	11.3787	11.4022	11.2017	11.3246	11.4231	11.447	11.4217
ENSG00000070061	12.2689	12.4106	12.4198	12.4805	12.4566	12.4627	12.3574	12.3937	12.3628	12.1071	12.1022	12.2108	11.851	11.7606	11.8351	11.3823	11.4053	11.4404	10.7521	10.6324	10.7678
ENSG00000070081	10.5384	10.3348	10.4965	10.4575	10.4982	10.4664	10.3003	10.5207	10.2646	10.332	10.2989	10.391	10.2001	10.0162	10.2264	10.2255	10.0065	10.1434	10.1959	10.1997	10.0916
ENSG00000070087	10.8631	10.8265	11.0518	11.0831	10.9178	10.9966	11.1902	11.1308	11.1441	10.9016	10.9855	11.0597	11.1755	11.2201	11.168	11.4246	11.3714	11.3652	11.4219	11.3161	11.3035
ENSG00000070159	9.81461	9.92641	9.9391	9.84984	10.0267	9.99406	9.7979	9.99	9.84279	9.97793	10.015	9.90537	10.0835	10.0634	9.87147	10.178	10.2053	10.1476	10.7755	10.7919	10.4685
ENSG00000070214	11.3938	11.4718	11.69	11.6687	11.5675	11.6436	11.7216	11.5464	11.5508	11.452	11.4126	11.5118	11.3781	11.397	11.2558	11.135	11.2171	11.1174	10.9666	10.8508	10.9242
ENSG00000070269	8.86541	8.8382	9.14468	9.21898	9.17777	9.04994	9.20218	8.99419	9.24998	9.11372	9.00251	9.2289	9.11767	9.14513	8.97049	9.05443	8.98253	8.8712	8.92037	8.91092	8.83182
ENSG00000070366	10.2506	10.3023	9.99119	10.0256	10.2286	10.2078	10.0285	10.1364	9.98136	10.326	10.3144	10.2032	10.3551	10.3848	10.288	10.2929	10.2896	10.2773	10.3679	10.2637	10.2622
ENSG00000070367	10.4074	10.4388	10.6052	10.5808	10.5293	10.5024	10.7202	10.4983	10.6165	10.6563	10.6278	10.7882	10.6744	10.8111	10.5669	10.8182	10.8238	10.7479	11.1199	11.0878	11.0242
ENSG00000070371	8.69297	8.73153	8.65901	8.46666	8.58799	8.42168	8.45457	8.5275	8.45374	9.00576	8.74003	8.65629	8.86673	8.88425	8.68101	8.85464	8.87117	8.86359	8.78155	8.59281	8.73817
ENSG00000070388	3.28651	4.89267	3.08186	3.58035	3.42178	2.76032	3.52193	3.29405	2.55401	3.8394	3.74033	2.99866	2.81297	2.89903	2.52352	3.29504	2.91363	2.92024	2.08824	2.92006	1.88167
ENSG00000070404	13.1355	13.0473	12.8571	12.8871	12.8656	12.8309	12.6269	12.8524	12.7989	12.7525	12.7897	12.7052	12.3822	12.0826	12.4143	11.8516	11.8666	11.9594	12.0376	12.1894	11.9148
ENSG00000070413	11.6986	11.7357	11.6692	11.7028	11.6017	11.6389	11.6608	11.7122	11.694	11.6826	11.7537	11.6307	11.5746	11.6132	11.6475	11.5073	11.4699	11.4882	11.0331	11.0584	11.1438
ENSG00000070423	10.7142	10.8014	10.4676	10.6069	10.7118	10.6034	10.5506	10.7487	10.6693	10.4819	10.5809	10.4793	10.6243	10.578	10.7668	10.7341	10.6633	10.6803	10.7782	10.8807	10.669
ENSG00000070444	9.3914	9.46536	9.32065	9.08773	9.41186	9.26293	9.29628	9.1564	9.18201	9.49891	9.18213	9.27486	9.53597	9.49212	9.49401	9.68094	9.7973	9.50082	10.072	10.0668	9.8217
ENSG00000070476	9.63785	9.76271	9.73091	9.75652	9.66162	9.69156	9.86781	9.53318	9.58808	9.91566	9.82939	9.80869	9.82877	10.0102	9.73981	9.78839	9.87089	9.65573	9.88786	10.0093	9.97711
ENSG00000070495	9.16802	9.23173	8.98731	9.10088	9.09367	8.94902	9.1015	9.09575	9.02894	9.1637	9.02322	9.16394	9.17555	9.26451	9.38549	9.55776	9.34705	9.378	10.0112	10.1578	10.0012
ENSG00000070501	8.64869	8.51706	8.67227	8.65676	8.69756	8.84777	8.76143	8.8669	8.70181	8.639	8.57209	8.59963	8.87469	8.67979	8.76217	8.94772	9.07284	9.04947	9.13865	9.10411	9.03501
ENSG00000070526	1.80823	1.20464	2.85251	1.58161	2.55049	2.49067	2.24652	2.55917	2.21862	1.87298	1.79614	2.28829	2.15191	1.65677	0.96345	0.911912	2.09341	2.09925	2.68268	1.79214	1.88167
ENSG00000070540	9.07738	9.21599	9.11261	9.25236	9.20771	9.19631	9.10935	9.30666	9.23547	9.07862	9.25984	9.08151	9.05132	9.11183	9.11095	9.20209	9.17219	9.16543	9.87292	9.9459	9.79724
ENSG00000070601	6.34107	6.42311	6.31115	5.74995	6.58101	6.15908	6.08039	6.11918	6.06136	5.83088	6.05597	6.17951	5.07551	5.19085	5.41949	4.14968	4.5773	4.53436	2.68268	1.79214	2.6713
ENSG00000070610	11.1575	11.3137	11.2065	11.1165	11.2504	11.0713	10.998	11.0749	11.0618	11.2783	11.2375	11.0837	11.292	11.334	11.2978	11.4493	11.3189	11.1987	11.5977	11.5549	11.5027
ENSG00000070614	12.684	12.7634	12.777	12.7118	12.6821	12.7408	12.6795	12.6189	12.6638	12.7753	12.7522	12.7709	12.6293	12.6588	12.6006	12.3328	12.3978	12.3698	12.1789	12.1077	12.2014
ENSG00000070669	11.6945	11.5696	11.6024	11.691	11.6581	11.6686	11.6938	11.8192	11.7091	11.8666	11.9227	11.8275	12.5354	12.454	12.2893	12.8742	12.9412	12.8495	13.3703	13.3011	13.2614
ENSG00000070718	7.89149	8.20252	8.01466	8.02841	7.73021	7.60774	7.9422	7.86999	7.87583	8.00856	8.18768	7.94555	7.98951	8.23532	7.87462	7.80754	7.77551	8.14301	8.16046	8.29764	7.91741
ENSG00000070731	4.73114	5.05266	4.98027	4.90778	4.60982	5.43165	4.7573	4.65895	4.5922	5.36335	5.20822	5.29517	3.81019	4.4203	4.69163	4.53916	4.61193	4.60763	4.41972	4.8085	4.87327
ENSG00000070756	13.7694	13.7582	13.7919	13.7748	13.8125	13.7724	13.7274	13.8242	13.7508	13.7656	13.8088	13.8051	13.8609	13.8049	13.8624	13.9519	13.9262	13.9244	14.1503	14.1834	14.0907
ENSG00000070759	7.54532	7.58121	7.55612	7.86535	7.73844	7.67452	7.78449	7.54659	7.77913	7.43629	7.55734	7.50804	7.32456	7.03251	7.31011	6.64177	6.87034	7.18521	6.45496	6.66069	6.62286
ENSG00000070761	8.83016	8.82995	8.80665	8.89584	8.81115	8.71527	8.83663	8.89684	8.7997	8.64541	8.73167	8.71349	8.64574	8.5859	8.691	8.62588	8.57309	8.73325	8.5715	8.84289	8.55461
ENSG00000070770	10.8198	10.8543	10.962	10.9071	10.9014	10.8768	10.9199	10.8953	10.9954	10.9968	10.9544	10.9552	11.0304	11.0125	11.0134	11.0679	11.1398	11.0602	11.4468	11.4458	11.3724
ENSG00000070778	11.1158	11.0454	11.051	10.9419	11.0764	11.0392	10.8871	10.8975	10.9437	11.2058	11.164	11.1274	11.3004	11.3195	11.1078	11.2954	11.3281	11.2791	11.3075	11.1757	11.2307
ENSG00000070785	8.50704	8.17673	8.2628	8.34371	8.42421	8.38227	8.2497	8.2865	8.44871	8.25482	8.34955	8.37834	8.27264	8.33969	8.60561	8.46243	8.54181	8.67646	8.49554	8.68203	8.79741
ENSG00000070814	10.3355	10.3708	10.0157	9.81355	10.23	10.0627	9.78816	10.1539	9.75195	10.4872	10.4158	10.2435	10.4443	10.5841	10.5699	10.5385	10.4558	10.5956	10.6488	10.7179	10.6578
ENSG00000070831	13.0101	12.8999	13.0784	13.1618	12.9639	13.0162	13.1364	13.1214	13.2441	12.9451	12.964	13.1044	12.9777	12.9187	13.0168	13.0428	13.1379	13.1733	13.204	13.2197	13.2255
ENSG00000070882	8.92232	8.93753	9.03943	8.94042	8.73094	8.87287	9.02681	8.89684	8.94228	9.32013	8.94937	9.2044	9.38622	9.43717	9.33757	9.59639	9.75018	9.48768	9.91565	9.985	9.96424
ENSG00000070950	7.55005	7.28791	7.31337	7.57995	7.38713	7.59055	7.4556	7.62736	7.61402	7.56359	7.32645	7.63188	7.45772	7.38187	7.64741	7.44113	7.52343	7.24891	7.60773	7.72247	7.56868
ENSG00000070961	11.6348	11.5686	11.7296	11.7759	11.5629	11.6786	11.7866	11.6343	11.7369	11.9152	11.8174	11.9217	11.8395	11.9049	11.7434	11.854	11.996	11.8494	11.933	11.8421	11.9417
ENSG00000071051	10.4262	10.3679	10.1826	10.1358	10.1795	10.1635	10.1207	10.2694	10.227	10.2804	10.5251	10.3572	10.59	10.709	10.7676	11.0809	10.9914	10.9845	11.3423	11.4681	11.3223
ENSG00000071054	12.4201	12.2725	12.319	12.1739	12.2584	12.3181	12.1294	12.1616	12.1391	12.4858	12.382	12.4151	12.5098	12.5947	12.4085	12.6409	12.6178	12.6158	13.0387	13.0281	12.9704
ENSG00000071073	9.15541	9.19366	9.3374	9.35253	9.36213	9.35995	9.58224	9.26825	9.3038	9.42631	9.33634	9.44533	9.17467	9.35654	9.0809	9.02299	9.14747	8.99013	8.80971	8.79035	8.88741
ENSG00000071082	12.9136	12.796	12.8205	13.0703	12.8889	12.8988	12.868	13.0444	13.0189	12.5044	12.6724	12.7215	12.5961	12.4467	12.7407	12.7775	12.6359	12.9855	12.7025	12.8325	12.8634
ENSG00000071127	13.4276	13.2937	13.2901	13.2185	13.3355	13.2758	13.127	13.433	13.2961	13.4164	13.41	13.4255	13.5356	13.5091	13.5778	13.6692	13.603	13.6652	14.0471	14.1186	13.9908
ENSG00000071189	9.69341	9.72539	9.81902	9.84828	9.64858	9.78896	9.92562	9.72225	9.92644	9.84779	9.78762	9.96602	9.83965	9.69686	9.62474	9.63689	9.73089	9.67034	9.64772	9.71593	9.6459
ENSG00000071205	4.00115	4.95469	4.10255	4.38752	5.02587	3.89347	4.7262	4.67064	4.97518	4.92085	4.93898	4.69279	5.11189	5.23276	5.24978	5.18037	5.57176	5.62795	6.11474	6.40517	6.16401
ENSG00000071242	10.2131	10.2258	10.1856	10.1523	10.1552	10.1267	10.2917	10.1882	10.2122	10.2752	10.4595	10.3444	10.5656	10.6211	10.4719	10.7969	10.853	10.6319	11.2052	11.1752	11.0286
ENSG00000071243	7.78913	7.39245	7.87632	8.09827	8.05408	7.8509	7.8562	7.86999	7.94877	7.72966	7.51379	7.81724	7.54678	7.67572	7.73364	7.66443	7.51056	7.86668	7.80944	7.88664	7.90129
ENSG00000071246	5.53453	5.30824	5.51735	5.51864	5.66669	5.72735	5.08573	5.24518	5.27661	5.53197	5.69194	5.42477	5.14351	4.85749	5.32007	5.4291	4.62727	5.80791	4.97061	4.76951	4.79729
ENSG00000071282	9.08404	8.66816	8.83051	8.55722	8.75141	8.73496	8.57848	8.82393	8.87275	9.18805	9.12896	9.29284	10.0755	9.94392	9.96631	10.9423	10.809	10.7453	11.9334	12.0488	11.8226
ENSG00000071462	10.2402	10.3068	10.2767	10.3591	10.4325	10.3815	10.406	10.3784	10.3799	10.2407	10.2674	10.3218	10.3283	10.3035	10.3502	10.4069	10.3932	10.328	10.3691	10.448	10.463
ENSG00000071537	12.4195	12.3894	12.5204	12.5409	12.3883	12.4934	12.5245	12.313	12.5409	12.4517	12.39	12.4934	12.1867	12.1892	12.0981	12.0746	12.2009	12.0437	12.4429	12.4523	12.3291
ENSG00000071539	6.15096	5.37326	5.5937	5.66749	4.91408	5.62976	5.79914	5.67004	5.44744	6.22252	5.75935	6.26944	6.05396	5.9375	6.24883	6.34376	6.4527	6.44671	6.54146	6.70678	6.68693
ENSG00000071553	11.8863	11.9219	11.8648	11.96	11.9256	11.845	11.986	12.025	12.0223	11.6629	11.8549	11.7838	11.5684	11.6097	11.7612	11.6554	11.6122	11.6325	11.6113	11.6056	11.5701
ENSG00000071564	10.5779	10.3708	10.2267	10.0838	10.2802	10.1132	9.99398	10.2509	10.3397	10.4271	10.5215	10.3401	10.6897	10.6894	10.7879	10.9825	10.9681	10.9621	11.2085	11.1556	11.0464
ENSG00000071575	8.76112	8.72709	9.03258	8.83733	8.71017	8.76974	8.85542	8.78924	8.82317	8.62933	8.84462	8.71081	8.49895	8.44148	8.52977	7.92732	7.91876	7.99297	6.85691	6.55127	6.98072
ENSG00000071626	10.9803	10.9789	10.8565	10.9198	10.9023	10.89	11.0065	10.9627	11.0005	11.0074	11.1382	10.8619	11.0869	11.1377	11.1127	11.1099	11.1065	11.018	11.2276	11.4196	11.2313
ENSG00000071655	11.3028	11.442	11.2017	11.0913	11.3066	11.2242	11.1476	11.2504	11.1111	11.3178	11.3554	11.2185	11.3035	11.3867	11.4246	11.4519	11.3191	11.3789	11.512	11.4485	11.3407
ENSG00000071794	9.75528	9.85504	10.0999	9.88219	9.98578	9.93059	9.92451	9.91739	9.79808	10.0155	9.88704	10.0997	9.9046	9.95022	9.79794	9.45496	9.4433	9.60338	9.25585	9.24353	9.39094
ENSG00000071859	10.2858	10.229	10.1497	10.1332	10.23	10.14	10.0521	10.3244	10.2018	10.3039	10.2022	10.142	10.447	10.4933	10.5753	10.8392	10.6524	10.6753	11.2534	11.3811	11.1815
ENSG00000071889	10.5838	10.7813	10.4777	10.4908	10.6323	10.5151	10.4607	10.666	10.5145	10.4308	10.6313	10.4297	10.5819	10.5263	10.6917	10.6231	10.5044	10.5274	10.4041	10.4488	10.3879
ENSG00000071894	11.6478	11.6875	11.4161	11.2993	11.4898	11.4253	11.2937	11.3468	11.4126	11.6338	11.6053	11.3867	11.5202	11.5529	11.5305	11.4593	11.3562	11.4029	11.3908	11.4364	11.3989
ENSG00000071994	9.94118	9.91866	9.91141	10.0048	9.9508	9.91341	10.047	9.93769	9.888	9.88348	10.0201	9.9559	9.96799	9.99504	10.1084	10.2549	10.174	10.1755	10.2951	10.3379	10.3812
ENSG00000072042	12.6327	12.7588	12.8262	12.7269	12.8371	12.8744	12.6353	12.7999	12.7449	12.596	12.664	12.6779	12.6154	12.5841	12.605	12.575	12.5751	12.6157	12.4659	12.3934	12.4684
ENSG00000072062	11.3756	11.3724	11.4161	11.1965	11.3558	11.2894	11.265	11.389	11.3833	11.2364	11.4048	11.2424	11.1931	11.1878	11.3391	11.1271	11.1055	11.0536	10.8994	10.8699	10.8555
ENSG00000072071	9.91337	10.0036	9.76019	9.66563	9.82701	9.92203	9.57942	9.61289	9.67879	9.98553	9.95871	9.83101	9.8758	9.87613	9.93445	9.6902	9.69863	9.73989	9.33547	9.40949	9.40243
ENSG00000072110	11.9509	11.8708	11.673	11.5757	11.7525	11.7592	11.4868	11.8436	11.6876	11.9879	11.8976	11.8708	12.0013	11.9069	12.0004	12.0433	11.9455	12.0242	12.4048	12.4915	12.468
ENSG00000072121	10.5433	10.5709	10.6395	10.5399	10.6179	10.597	10.6932	10.4068	10.6019	10.6634	10.6335	10.5845	10.4398	10.5739	10.4815	10.5367	10.4881	10.3849	10.7107	10.6685	10.6271
ENSG00000072133	8.44106	8.50675	8.51429	8.70234	8.54172	8.75052	8.77136	8.4529	8.69758	8.69569	8.61822	8.54065	8.37721	8.19349	8.06065	8.09484	8.14377	7.97895	8.02892	7.931	8.11198
ENSG00000072134	8.54135	8.68655	8.83051	8.60969	8.81115	8.60404	8.62301	8.69699	8.76376	8.77968	8.79729	8.67835	8.76475	8.60995	8.833	8.95799	8.91577	8.78788	8.97734	9.24548	9.10703
ENSG00000072135	10.091	10.0891	10.0483	10.0435	9.96665	9.97432	9.89757	10.1213	9.89356	10.0985	10.0624	9.93544	10.0858	10.2662	9.94004	10.1469	10.1389	9.95926	9.99443	9.88206	9.85415
ENSG00000072163	6.60484	6.46633	6.44081	6.29881	6.34274	6.41484	6.54126	6.56923	6.89678	6.79527	6.41072	6.26944	6.7518	6.62885	6.57056	6.87483	6.8398	6.88794	7.22421	7.32456	7.18086
ENSG00000072195	5.26798	5.07125	4.94805	4.58014	4.91408	4.78488	4.80563	5.01434	5.32125	5.68866	5.79191	5.52555	5.93718	5.85939	5.88137	6.22976	6.47936	6.37715	7.77415	7.84603	7.74726
ENSG00000072201	7.90661	8.11016	8.14088	8.09827	8.23943	8.10201	7.89758	8.02981	7.70947	8.03322	8.02599	8.06337	8.2319	7.99472	8.2571	8.14063	8.07551	8.04324	8.03489	7.9974	8.13971
ENSG00000072210	13.0061	12.965	13.0199	13.102	13.0049	13.0325	13.1198	13.1428	13.1031	13.164	13.1612	13.2562	13.4194	13.4204	13.4267	13.3113	13.3606	13.4402	12.9013	12.6569	12.9425
ENSG00000072274	10.2447	10.2737	10.3652	10.4369	10.3081	10.3964	10.5354	10.3773	10.5734	10.532	10.3787	10.5498	10.896	10.7529	10.5851	10.9169	10.9533	10.8878	11.2624	11.1113	11.1854
ENSG00000072310	12.3962	12.7286	12.5038	12.3806	12.5366	12.5217	12.3736	12.4523	12.436	12.2857	12.4199	12.2049	12.0079	12.0979	12.2332	11.9503	11.9113	11.8503	11.754	11.6703	11.6995
ENSG00000072364	11.2772	11.1107	11.3084	11.2728	11.1399	11.1787	11.2984	11.1526	11.2583	11.4547	11.3775	11.5686	11.547	11.6092	11.3401	11.8353	11.9651	11.7796	12.5831	12.566	12.5084
ENSG00000072401	9.40211	9.14461	9.46229	9.5986	9.34067	9.50462	9.5552	9.60747	9.63746	9.52695	9.55605	9.71976	9.5998	9.4594	9.60728	9.88302	9.81703	9.86077	10.0545	10.1337	10.0373
ENSG00000072415	9.9828	9.95704	10.1307	10.1061	10.055	10.0486	10.1685	9.99969	10.1471	10.2365	10.1372	10.1744	10.0813	10.0764	9.85084	9.87356	9.97526	9.89725	9.81333	9.70177	9.8088
ENSG00000072422	9.82659	9.53806	9.55113	9.62615	9.48215	9.48149	9.62529	9.65728	9.67879	9.91566	9.79567	9.91817	10.0616	9.98894	10.0108	10.2838	10.4184	10.2849	10.4417	10.5487	10.4866
ENSG00000072501	9.97205	10.0055	10.1015	9.83732	10.1304	10.2092	9.8148	9.86233	9.79808	10.2439	10.1245	10.0926	10.0721	10.0532	9.99076	10.0362	9.95878	9.96045	10.1972	10.0116	10.1632
ENSG00000072506	9.69559	9.90694	9.80904	9.88219	9.90584	9.88197	9.78326	9.93913	9.96914	9.53733	9.70026	9.65172	9.52421	9.47476	9.73339	9.54284	9.38633	9.70483	9.30118	9.35445	9.36767
ENSG00000072518	10.0894	10.3083	9.98234	9.90036	10.2388	10.0549	9.82317	10.115	9.98136	10.327	10.2143	10.127	10.259	10.2382	10.2592	10.3141	10.3702	10.2337	10.5625	10.5877	10.5509
ENSG00000072571	6.17614	6.42311	6.09178	6.24296	6.27647	5.62976	6.43286	5.90024	5.95206	6.35357	6.23241	6.52205	5.78779	6.05895	6.24883	5.46582	5.71326	5.96789	5.24258	5.27688	5.16612
ENSG00000072609	9.83451	10.0128	9.91141	9.81357	9.91676	9.81879	9.88848	9.76182	9.73555	10.0118	9.97298	9.97607	10.1075	10.1616	10.0732	10.2255	10.1781	10.1538	10.4259	10.3971	10.4316
ENSG00000072682	10.599	10.6076	10.5774	10.5705	10.4921	10.5444	10.5911	10.691	10.5641	10.5889	10.6558	10.6112	10.8073	10.9073	10.8882	11.0925	11.0437	10.9863	11.3063	11.3824	11.2715
ENSG00000072736	10.1856	10.216	10.2443	10.2977	10.22	10.3096	10.4375	10.207	10.4852	10.2181	10.2385	10.3407	10.2021	10.2357	10.0676	10.1934	10.2854	10.126	10.0881	9.99383	10.0052
ENSG00000072756	8.50207	8.3191	8.4335	8.51462	8.61058	8.59975	8.36563	8.40371	8.37652	8.68329	8.52928	8.6646	8.61755	8.55733	8.61263	8.80147	8.71727	8.7717	9.09069	8.86592	8.99761
ENSG00000072778	13.0442	13.1649	12.944	12.9263	13.0807	12.9499	12.9419	13.1241	13.027	13.0555	13.1454	12.9518	13.2478	13.2913	13.3278	13.4229	13.3126	13.2842	13.3467	13.424	13.3208
ENSG00000072786	8.58431	8.43241	8.33686	8.21898	8.25672	8.13795	8.14288	8.29552	8.15397	8.51146	8.50984	8.60827	8.73007	8.93907	8.70748	8.99585	9.05744	8.86867	10.115	10.1814	9.90352
ENSG00000072803	10.5685	10.6088	10.6294	10.6911	10.4614	10.598	10.6768	10.6219	10.7532	10.6618	10.6994	10.7216	10.6912	10.7053	10.642	10.7767	10.8221	10.7685	10.996	11.0394	10.9622
ENSG00000072818	4.10968	3.34108	3.87673	3.90219	3.24824	2.76032	3.08589	3.55657	4.07349	3.0181	3.60027	3.25497	3.79863	2.40767	3.93069	2.84213	3.43332	3.9802	3.27393	2.35205	3.02857
ENSG00000072832	3.61584	3.14222	3.74901	0.997485	3.42178	3.18359	3.20786	3.87797	2.82595	3.0181	2.57187	3.1325	3.38839	3.09353	3.10429	3.41912	3.31987	2.92024	3.27393	3.54526	2.86097
ENSG00000072840	9.67586	9.65475	9.6483	9.38084	9.66594	9.61499	9.46938	9.46888	9.19706	9.6862	9.78155	9.52356	9.62204	9.72833	9.51101	9.40706	9.27849	9.19201	8.88773	8.71342	8.89827
ENSG00000072849	10.3673	10.2768	10.3501	10.5893	10.5198	10.5444	10.5799	10.4857	10.5791	10.1934	10.2292	10.3555	10.1308	10.1342	10.2869	10.0579	10.0878	10.1786	10.1093	10.165	10.0175
ENSG00000072864	7.10188	7.50035	7.30203	7.02843	7.2209	7.17224	7.06162	7.21713	7.35961	7.54314	7.22278	7.43866	7.32456	7.29553	7.24835	7.62631	7.66371	7.39684	8.31579	8.40289	8.24985
ENSG00000072952	6.71202	6.73727	6.9566	6.92574	7.03298	6.69771	6.83428	6.75064	6.4103	6.47371	6.67791	6.81867	6.2625	6.31447	6.38624	5.72821	5.2999	6.07721	4.86723	4.31362	4.01926
ENSG00000072954	7.78094	7.91339	7.92146	7.7297	8.08667	7.98849	7.89304	8.04592	7.8532	7.8511	8.19378	8.15273	7.96983	8.00685	7.93747	8.16742	7.86416	8.0297	8.08759	8.10887	8.1073
ENSG00000072958	11.3878	11.5155	11.3883	11.407	11.4665	11.4671	11.3939	11.4813	11.4457	11.3254	11.4061	11.3627	11.4195	11.3273	11.4743	11.307	11.248	11.3018	10.9334	10.9796	10.9616
ENSG00000073008	12.2265	12.1336	12.0644	11.9711	12.1	12.1042	11.9107	12.0597	12.0357	12.1967	12.1113	12.1327	12.2209	12.3115	12.2359	12.4773	12.4713	12.4204	13.1942	13.2946	13.1605
ENSG00000073050	8.7526	8.60139	8.51429	8.37869	8.42421	8.57811	8.37868	8.70716	8.59223	8.708	8.72325	8.81404	8.44651	8.4007	8.71402	8.63205	8.43689	8.56826	8.50801	8.53943	8.59858
ENSG00000073060	12.8637	12.9853	12.8298	12.8732	12.9177	12.925	12.868	12.9393	12.8971	12.8309	12.9229	12.7979	12.8124	12.7746	12.8903	12.654	12.6168	12.6067	11.9592	11.8291	11.9567
ENSG00000073111	8.19229	7.96704	8.00071	8.05027	7.84897	7.69879	7.61293	7.99148	7.74267	8.09071	7.83609	7.95913	7.91427	7.82702	8.09614	7.98869	8.00386	7.99297	8.22461	7.95507	8.00043
ENSG00000073150	7.33214	7.26362	6.83606	6.8279	6.75332	6.68157	7.06969	7.07774	6.78966	7.24695	7.52352	7.03068	7.63066	8.066	7.79046	8.02332	7.91388	7.71706	8.62001	8.4679	8.59524
ENSG00000073169	10.4104	10.6327	10.3556	10.3481	10.6145	10.3576	10.3475	10.4689	10.3719	10.3654	10.32	10.1994	10.1626	10.1589	10.3782	9.95397	9.89584	9.98287	9.41094	9.28968	9.28108
ENSG00000073331	7.33214	7.33531	7.55211	7.35255	7.74662	7.69879	7.31337	7.41212	7.43263	7.46557	7.05853	7.20794	7.31679	7.58965	7.25734	7.43379	7.41712	7.30243	7.75256	7.8305	7.4333
ENSG00000073350	11.3844	11.52	11.2477	11.228	11.3458	11.2794	11.1451	11.2699	11.2979	11.2512	11.1772	11.1042	11.211	11.3316	11.3178	11.3626	11.1891	11.2083	11.1178	11.1091	11.1074
ENSG00000073417	10.1839	10.2399	10.2883	10.2884	10.3503	10.2495	10.2612	10.1389	10.1898	10.3527	10.2789	10.3572	10.3215	10.2862	10.3172	10.2591	10.3514	10.2792	10.4349	10.448	10.2913
ENSG00000073464	8.58431	8.57744	8.60469	8.58369	8.76356	8.61683	8.61477	8.55028	8.49816	8.708	8.61367	8.47601	8.39946	8.43701	8.37738	8.18063	8.25597	8.43082	8.36405	8.33847	8.22418
ENSG00000073536	8.32766	8.00417	8.18473	8.13964	7.87905	7.94857	7.95532	8.17855	8.2837	8.25901	8.32751	8.1006	8.67034	8.55733	8.54085	8.78426	8.68613	8.72207	9.05585	8.96644	9.0497
ENSG00000073578	12.2276	12.2819	12.2009	12.143	12.3499	12.2825	12.0176	12.2768	12.1714	12.1109	12.1653	12.1133	12.1055	12.0852	12.1831	12.1176	11.9895	12.0588	12.0725	11.942	11.9215
ENSG00000073584	11.4356	11.4493	11.4683	11.3557	11.4682	11.5402	11.2672	11.4753	11.4094	11.4638	11.4456	11.4769	11.5742	11.5521	11.5148	11.6302	11.5121	11.6011	11.4806	11.3643	11.4512
ENSG00000073605	9.96485	10.2004	9.89829	10.0407	10.1146	10.1779	9.94877	9.77316	9.7842	10.0401	9.85466	9.88417	9.83422	9.89256	9.65226	9.4164	9.35247	9.26122	9.05878	8.91828	9.13025
ENSG00000073614	9.96846	9.96082	10.1779	10.0824	10.1444	10.1132	10.0285	9.87892	9.97962	10.322	10.1716	10.2746	10.1253	10.2974	9.92461	10.0756	10.0965	10.0119	10.2534	10.2511	10.3646
ENSG00000073670	5.67363	5.37326	5.5937	5.20456	5.76663	4.72313	5.17817	4.67064	5.40659	5.32393	5.50818	4.77697	4.92007	5.05729	4.78655	4.73143	5.2999	4.05338	4.50347	4.372	4.5469
ENSG00000073711	8.49708	8.63539	8.6093	8.63522	8.54172	8.69531	8.58974	8.53513	8.68055	8.72019	8.49013	8.74779	8.73007	8.81007	8.64723	8.70115	8.59764	8.53351	8.87112	8.81423	8.77695
ENSG00000073712	10.9201	10.9544	10.9718	11.0076	10.9474	10.9835	11.0091	11.0209	10.9257	11.0731	11.0246	11.0728	11.1191	11.0147	10.9961	11.082	11.1575	11.1301	11.7173	11.7672	11.5628
ENSG00000073734	11.1654	11.3617	11.2798	11.158	11.3505	11.4094	11.165	11.0808	11.0252	11.5406	11.4074	11.4038	11.6752	11.7761	11.4598	11.3279	11.3045	11.2844	10.8047	10.5862	10.9021
ENSG00000073792	11.753	11.8574	11.7412	11.606	11.8517	11.8742	11.5541	11.7772	11.6737	11.8975	11.8774	11.8512	12.01	12.0478	11.8762	12.1304	12.0089	11.985	12.3685	12.3863	12.3109
ENSG00000073803	9.61041	9.67562	9.75604	9.73137	9.67024	9.7195	9.76723	9.68328	9.64406	9.67997	9.73626	9.70909	9.53597	9.55541	9.55904	9.43489	9.29922	9.42701	9.28372	9.18163	9.06425
ENSG00000073849	12.8777	13.1954	13.2126	13.2509	13.1775	13.2811	13.352	13.163	13.2849	12.9343	13.0253	13.0552	12.5115	12.4278	12.6731	11.8768	11.9458	11.9525	11.0067	10.8994	11.1103
ENSG00000073910	7.99416	7.81651	7.7233	8.0718	7.77089	7.74613	7.93338	7.6765	7.84558	7.99858	7.89723	7.89464	7.61173	7.17173	7.51131	7.23708	7.17764	7.34677	7.42867	7.30222	7.36445
ENSG00000073921	11.8064	11.8163	11.9562	11.9459	11.8784	11.9123	11.9119	11.871	11.9312	11.9142	11.8679	11.9736	11.8973	11.9412	11.8545	11.9593	11.9969	11.9504	12.38	12.4749	12.391
ENSG00000073969	10.3461	10.2904	10.5389	10.4364	10.4381	10.4552	10.5037	10.467	10.4543	10.1866	10.4096	10.4438	10.2221	10.096	10.1631	10.1333	10.0949	10.0513	9.85199	9.83571	9.86444
ENSG00000074054	11.0173	10.9798	10.9736	10.947	10.9296	10.9611	10.9215	10.8706	10.8891	11.1895	11.0576	11.016	11.0422	11.1294	11.0253	10.9228	11.0144	10.9175	11.0331	10.9482	11.0477
ENSG00000074071	10.4941	10.4252	10.3961	10.4858	10.5412	10.4688	10.4242	10.6616	10.5229	10.2162	10.4275	10.3632	10.3786	10.4976	10.6658	10.4889	10.2659	10.5473	10.1443	10.1316	10.1777
ENSG00000074181	4.89601	4.95469	4.76207	4.85312	5.12962	4.44571	4.40769	5.01434	4.97518	5.38649	4.93898	5.22947	5.14737	4.68709	5.17587	5.72821	5.99775	5.4223	7.47336	7.51793	7.06991
ENSG00000074201	10.3158	10.3113	10.357	10.3248	10.2956	10.3652	10.3508	10.4057	10.5324	10.3478	10.263	10.4635	10.3758	10.4112	10.4387	10.6004	10.4963	10.5771	10.7657	10.7395	10.7611
ENSG00000074211	4.21062	3.51582	3.87673	4.24316	3.84402	2.98742	4.30208	4.55526	4.07349	4.35951	4.46072	4.23802	4.69878	4.00644	4.51407	5.18037	5.66761	5.08102	6.55815	6.82642	6.3337
ENSG00000074219	10.0267	9.57061	9.69886	9.55722	9.66809	9.54533	9.4785	9.79875	9.84279	9.87123	9.91687	9.89127	10.2468	10.29	10.4298	10.7919	10.7965	10.7617	11.015	11.0483	11.0471
ENSG00000074266	8.50704	8.34827	8.26863	8.42543	8.5036	8.26256	8.48203	8.32664	8.6193	8.639	8.55796	8.44096	8.43937	8.40529	8.40594	8.28625	8.40596	8.5271	8.50848	8.52368	8.65091
ENSG00000074276	7.19105	7.32361	7.37955	7.13455	7.61873	7.32556	7.14797	7.33551	7.16516	7.39123	7.05853	7.13006	6.7518	6.9635	7.18383	6.79691	7.16948	6.74061	7.49953	7.47862	7.30036
ENSG00000074319	10.5226	10.5771	10.7269	10.7665	10.6156	10.7047	10.6735	10.7995	10.7903	10.5041	10.5786	10.7374	10.6851	10.5699	10.5967	10.7818	10.7724	10.8815	10.9043	10.9696	10.9687
ENSG00000074356	10.4941	10.5218	10.588	10.5762	10.5552	10.5094	10.603	10.414	10.4681	10.6807	10.5937	10.5602	10.7334	10.8249	10.5175	10.6207	10.7245	10.4717	10.6891	10.6443	10.715
ENSG00000074370	3.28651	3.51582	3.74901	1.99623	3.84402	3.35625	3.42464	3.1424	3.05467	3.74704	4.09372	3.82866	3.88525	4.09998	2.93542	2.65288	3.19675	3.73533	4.50347	4.12283	4.24032
ENSG00000074410	9.42329	9.72094	9.76845	9.81515	9.86321	9.89428	9.91559	9.87441	10.0055	9.92095	9.88893	9.86386	10.4018	10.5524	10.4318	10.9156	10.9444	10.5879	11.9141	12.076	11.6882
ENSG00000074416	9.72787	9.54312	9.47748	9.36566	9.29398	9.3188	9.265	9.45084	9.47656	9.67997	9.56785	9.65589	9.66092	9.78224	9.84787	10.7709	10.8188	10.5201	12.7993	13.0746	12.623
ENSG00000074527	9.58478	9.33444	9.46737	9.43792	9.31889	9.21326	9.42448	9.52746	9.64626	9.60302	9.58421	9.75002	9.97047	9.98282	9.93725	10.5238	10.6362	10.4251	11.4552	11.4893	11.3989
ENSG00000074582	9.30272	9.46003	9.37304	9.52635	9.41186	9.3851	9.52178	9.554	9.53221	9.46488	9.23637	9.32989	9.44265	9.33024	9.37314	9.55303	9.3828	9.39393	9.28873	9.24743	9.38709
ENSG00000074590	8.68422	8.64953	8.78239	8.51462	8.70178	8.66279	8.56141	8.5465	8.7678	8.74727	8.9054	8.81404	8.53624	8.51974	8.46531	8.03306	8.14377	8.17615	7.73798	7.88162	8.01048
ENSG00000074603	9.43898	9.45199	9.62575	9.64243	9.48459	9.68144	9.76723	9.54835	9.67234	9.60302	9.55368	9.5803	9.58208	9.55128	9.48829	9.31022	9.45174	9.29178	9.30365	9.23372	9.37547
ENSG00000074621	7.89907	8.22157	8.04216	7.96653	8.12484	7.91444	7.66178	7.73069	7.50214	8.08129	8.09938	7.8222	8.06567	8.05436	7.7142	7.40406	7.49104	7.67709	7.04631	6.82642	6.97046
ENSG00000074657	9.93523	9.78622	9.87552	9.7465	9.88918	9.88018	9.72051	9.73223	9.73334	10.1204	10.0115	9.99259	9.99371	10.2056	9.8773	10.1345	10.1157	10.1221	10.4258	10.4014	10.3449
ENSG00000074660	6.24914	6.88792	6.44081	6.26182	6.65242	6.35503	6.45766	6.23619	6.47099	6.62409	6.62468	6.05016	6.2625	6.35299	5.99317	5.92942	5.77912	5.52878	5.24258	5.84939	5.86493
ENSG00000074695	11.6523	11.8199	11.9448	11.9312	11.7921	11.914	11.9745	11.8661	11.8943	11.8393	11.802	11.9996	11.865	11.7416	11.6268	11.604	11.7171	11.6799	11.8156	11.8141	11.7585
ENSG00000074696	12.5507	12.6011	12.6403	12.665	12.6194	12.6512	12.6607	12.6798	12.6818	12.4576	12.5073	12.6107	12.5651	12.5709	12.6643	12.7042	12.6791	12.6646	12.4983	12.3905	12.47
ENSG00000074706	4.63054	4.53491	4.10255	4.58014	4.66058	4.78488	4.45773	4.42985	4.44021	5.08075	3.85325	4.85651	4.79141	4.00644	3.63222	3.83016	4.8467	4.31382	4.50347	4.372	3.93735
ENSG00000074755	10.4637	10.5659	10.5113	10.3743	10.3664	10.3853	10.4553	10.3408	10.393	10.6282	10.5539	10.5003	10.4629	10.5462	10.3967	10.3201	10.3905	10.1867	10.3488	10.3534	10.4033
ENSG00000074800	13.9204	13.9491	13.9095	13.9392	13.9644	13.949	13.9066	14.13	14.092	13.9508	14.0147	14.021	14.299	14.3256	14.442	14.7235	14.6305	14.716	15.0271	15.0414	14.9812
ENSG00000074842	10.5697	10.5597	10.549	10.7049	10.64	10.4863	10.5142	10.7222	10.6299	10.3789	10.5312	10.5203	10.462	10.4169	10.6691	10.5897	10.4201	10.6281	10.6787	10.875	10.6785
ENSG00000074855	8.95178	9.15455	8.59079	8.36567	8.67201	8.69933	8.5813	8.55028	8.32812	8.99827	8.9385	8.63953	9.1199	9.32055	9.11343	9.46219	9.32333	9.153	9.24041	9.16522	9.25384
ENSG00000074935	8.49708	8.56258	8.55782	8.63883	8.55109	8.73105	8.89228	8.52367	8.68055	8.76798	8.58144	8.70814	8.68852	8.61392	8.32278	8.60969	8.81471	8.73046	8.59191	8.63811	8.67954
ENSG00000074964	11.3857	11.6137	11.3673	11.3112	11.4671	11.4168	11.229	11.2682	11.259	11.2632	11.3354	11.1478	10.9716	10.9905	11.0694	10.5689	10.5149	10.5521	10.2838	10.3324	10.2789
ENSG00000074966	2.85904	2.9115	3.74901	1.99623	2.8223	2.49067	4.24623	3.1424	3.58056	3.30397	4.09372	3.66156	2.40741	3.41804	2.93542	3.99875	4.11585	3.20354	4.43282	4.31362	4.49058
ENSG00000075089	8.35548	8.29532	8.43869	8.62069	8.4191	8.5428	8.70558	8.5764	8.3818	8.30021	8.50494	8.53462	8.32394	8.43701	8.17886	8.24072	8.37079	8.45803	8.35453	8.32745	8.30805
ENSG00000075131	5.26798	5.80224	5.69975	5.77642	5.94787	5.33175	5.26505	5.39599	5.23055	5.2916	5.42758	5.963	5.67074	5.00988	5.45116	5.18037	5.64424	5.89011	5.60586	5.18218	5.57108
ENSG00000075142	10.7195	10.6398	10.7758	10.8397	10.7086	10.6289	10.6768	10.8208	10.8179	10.481	10.604	10.7062	10.6195	10.5441	10.6675	10.7251	10.6465	10.8632	10.6844	10.769	10.8166
ENSG00000075151	10.7217	10.6643	10.5101	10.4044	10.5645	10.655	10.398	10.4538	10.4431	10.8512	10.751	10.74	10.8862	10.8852	10.7237	10.9552	10.9227	10.8394	11.4013	11.2727	11.3081
ENSG00000075188	8.40424	8.01876	8.48452	8.71949	8.53229	8.58681	8.56997	8.55779	8.55066	8.16398	8.23581	8.65072	8.21945	8.30081	8.37738	8.46963	8.45716	8.44109	7.64727	7.91145	7.94387
ENSG00000075213	4.10968	3.94044	3.60888	2.80304	2.8223	4.10193	3.69879	2.78082	4.26847	3.0181	2.84444	3.36785	3.96696	3.79894	3.39227	3.73785	3.81457	4.18947	3.10244	3.98	3.02857
ENSG00000075218	6.07267	5.12619	5.00508	4.99512	5.3604	5.45083	5.37329	5.09917	5.63594	5.91817	5.69194	5.57341	5.31277	4.8029	5.41949	5.14486	5.00188	5.18238	4.35852	5.36575	5.23631
ENSG00000075223	6.34107	6.35576	6.57868	6.45445	6.36417	6.33452	6.71591	6.39562	6.83655	6.76026	6.88829	6.86748	6.52779	5.96262	5.78524	5.3768	5.80042	5.74302	5.20066	5.3942	5.57108
ENSG00000075234	11.8284	12.0253	11.9135	11.9389	12.0369	11.9218	11.932	11.9802	11.9208	11.7271	11.8597	11.7562	11.6911	11.6107	11.7236	11.4692	11.4315	11.4413	10.9713	10.9619	11.0137
ENSG00000075239	10.8058	10.8724	10.9365	10.9687	11.0625	11.0534	10.9171	11.0304	10.8487	10.7237	10.7239	10.7915	10.6964	10.5861	10.739	10.7607	10.6332	10.6818	10.35	10.3971	10.4575
ENSG00000075240	9.9115	9.97772	9.88126	9.72459	9.99096	9.9374	9.78448	9.82856	9.70218	9.89966	9.92056	9.77582	9.97171	10.0207	9.91755	9.85308	9.8506	9.79427	9.91403	9.96855	9.90756
ENSG00000075275	9.36427	9.32859	9.32065	8.98933	9.24861	9.26021	8.9805	9.15392	9.05561	9.67685	9.41684	9.33163	9.58046	9.84776	9.43781	9.70399	9.71134	9.63204	10.3488	10.4014	10.1954
ENSG00000075292	11.2072	11.324	11.2631	11.121	11.407	11.3411	11.0423	11.1576	10.9702	11.4492	11.3722	11.3071	11.4195	11.4562	11.165	11.247	11.1335	11.1886	11.256	11.2373	11.2856
ENSG00000075303	8.85765	8.96038	9.11908	9.2262	9.06124	9.09024	9.22583	9.09575	9.04899	8.95247	8.87153	9.09182	8.75903	8.45039	8.81181	8.59003	8.5195	8.56514	8.01689	8.06088	7.87403
ENSG00000075336	8.74858	8.69566	8.78239	8.92275	8.87971	8.73887	8.74137	8.83325	8.79575	8.67704	8.64965	8.60252	8.75616	8.66456	8.89764	8.76393	8.73397	8.7471	8.39226	8.62317	8.55461
ENSG00000075391	9.38331	9.05897	9.26629	9.43792	9.24573	9.34722	9.24198	9.35274	9.39538	9.4811	9.37715	9.58761	9.37878	9.21213	9.25922	9.26545	9.25168	9.31615	9.4957	9.45577	9.50017
ENSG00000075399	9.70643	9.68708	9.56067	9.39372	9.41699	9.55423	9.44323	9.56709	9.36105	9.40946	9.53936	9.25848	9.50894	9.52622	9.65566	9.44587	9.28417	9.25735	9.09927	9.11483	9.05214
ENSG00000075407	8.78635	8.69706	8.59785	8.63001	8.64145	8.87212	8.50062	8.38854	8.35644	8.91322	8.65094	8.63132	8.91176	8.8348	8.68091	8.78562	8.923	8.6706	9.22089	9.15829	9.28892
ENSG00000075413	10.7946	10.7983	10.7799	10.6612	10.8605	10.749	10.6735	10.7046	10.578	10.9096	10.8098	10.8098	10.8443	10.8317	10.804	10.8639	10.7377	10.7908	10.9635	10.989	11.0187
ENSG00000075415	13.8029	13.8032	13.8902	13.9654	13.8976	13.8966	13.8739	13.9814	13.956	13.7344	13.779	13.8382	13.785	13.76	13.8626	13.9105	13.8637	13.9663	13.8223	13.7853	13.8448
ENSG00000075420	11.3871	11.3313	11.3916	11.3326	11.2287	11.21	11.3511	11.2859	11.3833	11.4916	11.4501	11.6243	11.5827	11.5724	11.449	11.7836	11.858	11.7442	12.2873	12.223	12.2191
ENSG00000075426	9.76983	9.65475	9.73302	9.50078	9.49435	9.47448	9.52911	9.57821	9.40837	9.82538	9.8757	9.82978	10.1141	10.1629	9.95116	10.4915	10.5872	10.4371	11.4327	11.5263	11.3233
ENSG00000075461	4.47691	4.53491	4.10255	4.51875	3.96115	4.59107	4.45773	4.0583	5.27661	3.8394	4.09372	4.23802	5.182	4.6255	4.45281	5.9084	6.3553	6.19509	7.09289	7.2947	7.17193
ENSG00000075539	9.27386	9.37469	9.5559	9.31465	9.30511	9.3214	9.45251	9.3022	9.34222	9.47571	9.51031	9.52964	9.51405	9.41686	9.27258	9.40706	9.42284	9.33462	9.64577	9.60317	9.60337
ENSG00000075568	10.991	11.071	11.0695	10.9644	11.0419	11.0136	10.9448	10.9619	10.9221	11.0497	11.1262	11.0597	11.0375	11.0844	11.0247	10.9825	11.0064	11.0469	11.2367	11.1654	11.0802
ENSG00000075618	9.97922	9.75619	9.54152	9.41914	9.54448	9.30832	9.40548	9.71554	9.69584	9.97793	10.0321	9.91003	9.88371	9.87282	10.0358	10.4265	10.4062	10.4251	11.1157	11.3016	11.1815
ENSG00000075624	17.0129	16.9488	17.0171	17.0118	16.9682	16.8786	16.9807	17.1144	17.1437	16.9134	16.9879	16.9765	16.9848	16.9362	17.094	17.1351	17.125	17.1453	17.1477	17.1698	17.1026
ENSG00000075643	9.12017	9.49436	9.57721	9.59674	9.67668	9.54533	9.73208	9.59108	9.62638	9.6388	9.50541	9.65032	9.96177	9.98435	9.82539	9.87762	10.0594	9.84539	10.2888	10.2781	10.0833
ENSG00000075651	9.28836	9.25039	9.22489	9.35911	9.23414	9.33437	9.11521	9.16872	9.32039	9.43928	9.17906	9.40622	9.14206	9.32782	9.16925	9.31422	9.32333	9.3474	9.63204	9.62134	9.50373
ENSG00000075702	6.64146	6.26075	6.11787	6.22385	6.68684	6.68157	6.28825	6.07797	6.70797	6.92739	6.88829	6.605	6.55447	6.64446	6.24883	5.97057	6.43918	5.96789	6.30478	6.62513	6.56948
ENSG00000075711	10.9812	10.9695	11.0193	10.9658	10.9322	11.0329	11.0059	10.9669	10.8779	11.0302	11.0143	11.0623	11.0428	11.0327	10.8889	10.8461	10.892	10.8323	10.6662	10.6317	10.6594
ENSG00000075785	12.1207	12.1424	12.2899	12.202	12.2026	12.202	12.2356	12.3375	12.2515	12.1432	12.1945	12.228	12.2015	12.1552	12.283	12.4963	12.4771	12.4618	12.9375	13.026	12.8444
ENSG00000075790	9.2992	9.14883	9.39147	9.33927	9.30704	9.36653	9.42635	9.40158	9.37929	9.40569	9.36368	9.49278	9.45784	9.466	9.36977	9.54284	9.51914	9.378	9.73286	9.79135	9.75856
ENSG00000075826	8.85071	9.05345	8.99307	8.89312	8.95664	8.82223	9.04124	8.72669	8.80364	8.92304	9.07256	8.61146	8.67415	8.66991	8.53842	8.185	8.2203	8.07776	7.51859	7.48769	7.20731
ENSG00000075856	10.2024	10.2783	10.1015	10.0637	10.1335	10.1192	9.95096	10.1601	10.0837	10.3478	10.2514	10.1627	10.3128	10.3048	10.1846	10.2455	10.2023	10.3271	10.3761	10.3847	10.3927
ENSG00000075914	9.1774	9.29303	9.17295	9.25236	9.12539	9.26293	9.22041	9.35274	9.12335	9.09042	9.2772	9.17756	9.19389	9.26862	9.27479	9.35363	9.21645	9.40446	9.35948	9.36886	9.25384
ENSG00000075945	9.50257	9.58048	9.40782	9.44824	9.62879	9.65068	9.49357	9.53699	9.37963	9.58145	9.65672	9.58469	9.53094	9.52411	9.43186	9.60621	9.31225	9.51222	9.34031	9.33441	9.40052
ENSG00000075975	9.68027	9.66174	9.57721	9.72289	9.69159	9.72738	9.73588	9.80033	9.7621	9.56802	9.74043	9.6875	9.61413	9.60012	9.72532	9.68712	9.83262	9.72876	9.89937	9.81526	9.86111
ENSG00000076003	8.28778	8.01876	7.99368	7.84048	8.05408	8.17878	8.32577	8.27743	8.19653	8.4432	8.19986	8.3477	8.51262	8.33969	8.47305	8.51553	8.26749	8.44789	8.29103	8.37818	8.43659
ENSG00000076043	10.0163	9.8872	9.89075	9.98791	9.95257	9.96267	9.95423	9.98861	10.0208	9.94443	9.86808	9.95815	9.99132	9.95648	10.1208	10.234	10.299	10.3132	10.5001	10.5846	10.4712
ENSG00000076053	9.76309	9.58048	9.86812	9.83575	9.73279	9.78896	9.94492	9.8064	9.888	9.62403	9.62995	9.97779	9.85246	9.66278	9.75731	9.89188	9.91794	10.0811	10.1984	10.131	10.2314
ENSG00000076067	10.1357	10.1852	10.0656	10.0844	10.0141	10.0805	10.1842	9.96781	10.2037	10.1784	10.0859	10.1628	10.1001	10.2005	10.1509	10.2581	10.4098	10.2516	10.2889	10.2421	10.3087
ENSG00000076108	11.4217	11.5938	11.504	11.3393	11.491	11.4735	11.329	11.2739	11.3654	11.6274	11.518	11.4598	11.4963	11.5937	11.3533	11.4278	11.4413	11.3625	11.5625	11.562	11.5827
ENSG00000076201	11.2359	11.3458	11.1372	10.8607	11.1675	11.1005	10.9437	11.1105	11.0201	11.3453	11.294	11.1384	11.4326	11.5136	11.4476	11.6847	11.5883	11.4502	11.8743	11.8639	11.7184
ENSG00000076242	9.35603	9.25039	9.27211	9.36566	9.31614	9.35995	9.24911	9.20745	9.36904	9.18805	9.27432	9.33163	9.20445	9.25089	9.2525	9.06634	9.03963	9.15715	9.2635	9.07585	9.07865
ENSG00000076248	10.0215	10.1114	10.1529	10.0353	10.1886	10.1147	10.2101	10.2038	10.2445	9.94713	10.0905	10.0435	9.93664	10.0117	9.94422	9.77974	9.75291	9.84282	9.29123	9.15694	9.30781
ENSG00000076258	7.78094	7.79971	8.34792	8.0339	7.88648	8.22407	7.86086	8.11885	8.15397	7.86214	7.74756	7.90403	7.41469	7.33454	7.51131	7.27041	6.99569	7.18521	6.38183	6.27355	6.36537
ENSG00000076321	9.78218	9.90694	9.86979	9.70922	9.79383	10.0296	9.84096	9.75693	9.81379	10.0106	9.76524	9.86507	9.73422	9.76092	9.54443	9.73716	9.81441	9.68912	9.65162	9.68028	9.6667
ENSG00000076351	11.6701	11.8498	11.7158	11.6257	11.7429	11.751	11.5698	11.6485	11.6278	11.805	11.7542	11.6841	11.8733	11.9499	11.9214	11.7415	11.7227	11.7247	11.059	10.9988	11.0939
ENSG00000076356	9.06057	9.25039	9.16984	8.88372	8.95579	8.96245	9.05146	9.02162	8.84627	9.26292	9.18213	9.07529	9.24596	9.30099	9.07074	9.27575	9.4125	9.2021	10.0112	10.2276	9.97583
ENSG00000076382	8.56538	8.59215	8.51919	8.40289	8.80211	8.79997	8.31702	8.61293	8.36057	8.52195	8.60453	8.55264	8.16855	8.14494	8.13566	7.49852	7.43084	7.8768	6.50834	6.62657	7.03095
ENSG00000076513	10.7002	10.7919	10.7697	10.7448	10.7811	10.8078	10.6997	10.6538	10.7045	10.6807	10.7047	10.6515	10.5949	10.5688	10.4729	10.3141	10.3568	10.4303	10.2327	10.1732	10.1643
ENSG00000076554	9.52437	9.74682	9.80333	9.88355	9.74114	9.78762	9.78508	9.80738	9.859	9.77341	9.72072	9.84379	9.88871	9.8528	9.88387	10.036	10.0459	9.97437	10.1206	10.1398	9.99679
ENSG00000076555	9.57298	9.94372	9.69237	9.64782	9.89668	9.89603	9.57517	9.46089	9.50828	9.70933	9.72154	9.52508	9.29227	9.55334	9.24122	8.58672	8.60673	8.73046	6.99819	7.03048	7.21602
ENSG00000076604	11.4124	11.2785	11.1388	11.2664	11.188	11.105	11.1673	11.3424	11.2895	11.4079	11.4373	11.3468	11.4833	11.5529	11.6316	11.87	11.803	11.7823	12.1697	12.1689	12.0646
ENSG00000076641	10.4275	10.4829	10.6054	10.698	10.5388	10.5298	10.6669	10.5043	10.6476	10.6217	10.6075	10.7069	10.4443	10.426	10.4148	9.85994	10.1912	10.0096	9.66131	9.74521	9.73041
ENSG00000076650	8.27035	8.25892	7.99368	8.11393	8.15589	8.44577	7.96833	8.12392	8.16013	8.27149	8.40323	8.1684	8.25648	8.34924	8.40594	8.17183	8.22873	8.17615	8.13287	8.22031	8.2834
ENSG00000076662	8.33885	8.39934	8.28023	8.45441	8.4191	8.22407	8.27434	8.5275	8.25522	8.11401	8.36587	8.12891	8.10681	7.8873	8.38149	7.92209	7.70947	7.98364	6.84336	6.78406	6.66164
ENSG00000076685	11.3592	11.2291	11.2863	11.2358	11.259	11.1973	11.2632	11.2068	11.1997	11.3099	11.304	11.3825	11.2891	11.1778	11.205	11.2153	11.2682	11.1563	11.2675	11.2684	11.3218
ENSG00000076706	6.60484	6.07778	6.11787	6.12432	6.34274	6.84993	6.30202	6.53918	6.70797	6.8518	6.7625	6.76814	6.55447	6.87365	6.28443	7.26215	7.20186	7.30243	8.13287	8.55551	8.30805
ENSG00000076716	7.66122	7.53121	7.6084	7.61704	7.55493	7.40636	7.59068	7.28207	7.83792	7.9631	7.68825	8.03801	7.73346	7.77833	7.90353	8.82129	8.90106	8.64721	10.5594	10.7305	10.426
ENSG00000076770	14.6004	14.7974	14.9483	15.011	14.822	14.9424	14.942	14.726	14.9813	14.6179	14.5827	14.7576	14.1842	14.0038	14.1179	13.4013	13.582	13.5698	12.3522	12.0583	12.448
ENSG00000076826	10.9349	10.8502	10.6552	10.5302	10.9142	10.8688	10.7583	10.9355	10.3878	10.8253	10.8364	10.8104	11.123	11.2775	11.3956	11.4525	11.1962	11.2787	11.4344	11.2091	11.4156
ENSG00000076864	10.7524	10.719	10.6474	10.4858	10.6499	10.5731	10.4297	10.6476	10.5676	10.7765	10.7427	10.5735	10.828	10.9289	10.921	11.2029	11.1533	11.1322	11.5131	11.4547	11.483
ENSG00000076924	9.96304	9.97585	9.82497	9.90036	9.91313	9.89603	9.90097	10.0175	9.81964	9.87941	9.8757	9.86747	9.83286	9.91365	9.99076	9.97813	9.86331	9.90098	9.91727	9.95786	9.90352
ENSG00000076928	10.1793	10.3536	10.1129	9.91681	10.1567	10.1311	9.96616	10.0906	10.0343	10.3595	10.2889	10.1763	10.3283	10.3578	10.2769	10.3574	10.2981	10.2735	10.5279	10.7326	10.5612
ENSG00000076944	10.5832	10.432	10.3223	10.195	10.4376	10.3652	10.1694	10.4827	10.2314	10.5199	10.4106	10.2773	10.4496	10.4954	10.4863	10.659	10.5787	10.5699	10.8896	10.9179	10.7641
ENSG00000076984	10.0943	10.0434	9.9058	9.71436	9.96665	9.85882	9.82079	9.78601	9.80399	9.98427	10.0608	9.79991	10.1242	10.0807	10.0579	10.1725	10.1472	10.1652	10.4304	10.4988	10.4794
ENSG00000077044	9.27677	9.33735	9.28943	9.03389	9.25723	9.37006	9.20218	9.24284	9.27856	9.54934	9.43757	9.29284	9.47966	9.72283	9.602	9.63369	9.75291	9.57415	10.0894	10.2443	10.01
ENSG00000077063	5.06728	4.53491	4.69434	4.63902	4.26444	4.78488	4.24623	4.96997	5.13375	5.44646	4.93898	4.93189	4.65014	5.19085	5.01564	5.18037	5.23879	5.08102	5.11299	4.31362	5.23631
ENSG00000077092	8.65765	8.40491	8.48953	8.56103	8.35097	8.31059	8.4422	8.44481	8.4884	8.63256	8.36587	8.61114	8.54624	8.52396	8.60913	8.61619	8.66596	8.79323	8.20355	8.15532	8.50927
ENSG00000077097	11.0441	10.9013	11.0416	10.883	11.078	11.0651	10.7508	10.9188	10.8295	11.1999	11.016	11.1733	11.0937	11.0591	10.9118	11.0209	10.9025	10.9786	11.1319	11.1086	11.1156
ENSG00000077147	12.0713	11.9943	12.1468	12.2358	12.065	12.1687	12.2839	12.1286	12.2587	12.2244	12.168	12.3044	12.2146	12.163	12.1	12.1602	12.2819	12.1456	12.4415	12.4976	12.4181
ENSG00000077150	10.6095	10.4789	10.2753	10.1873	10.4211	10.3019	10.1419	10.4264	10.1078	10.481	10.5384	10.4289	10.4778	10.4954	10.6599	10.7228	10.6698	10.7384	11.1866	11.2495	11.176
ENSG00000077152	6.22522	5.76811	6.16867	6.26182	6.15877	5.72735	6.18806	6.13935	6.4103	5.76175	6.13424	6.21011	5.87504	5.85939	6.48135	5.99071	5.97919	6.60113	6.092	6.05935	5.51571
ENSG00000077157	8.92232	8.98659	8.98022	8.87456	8.74734	8.86574	8.85075	8.78605	8.77985	9.09042	8.98853	9.02454	8.8931	9.28614	8.71402	8.72539	9.00105	8.69373	8.70492	8.56805	8.78575
ENSG00000077232	11.3978	11.3262	11.4537	11.5332	11.4345	11.4283	11.5166	11.431	11.6003	11.4983	11.4741	11.5642	11.4655	11.483	11.4535	11.5863	11.6931	11.5201	11.8147	11.8524	11.8373
ENSG00000077235	11.0389	11.2229	11.0644	10.8467	11.041	11.0736	10.7989	10.9283	10.8458	11.2274	11.1468	11.0257	11.1191	11.1542	11.0397	11.0227	11.0161	10.9657	11.0757	11.169	11.0962
ENSG00000077238	11.1044	11.1477	11.0518	10.8966	11.1069	11.0007	10.8325	11.0148	10.8835	11.0737	11.0767	10.9625	10.9728	11.0635	11.0776	11.2019	11.1621	11.129	11.8499	11.8906	11.7291
ENSG00000077254	10.1042	10.14	10.4147	10.3337	10.2183	10.3397	10.3063	10.12	10.2401	10.2804	10.2601	10.3538	10.3814	10.2725	10.133	10.2019	10.1882	10.1538	10.3062	10.1189	10.0725
ENSG00000077264	8.63966	8.74475	8.82656	8.62434	8.61506	8.79247	8.83663	8.4529	8.41307	8.69878	8.63626	8.63671	8.53289	8.53237	8.37738	8.50156	8.51307	8.41703	8.28603	8.0829	8.37958
ENSG00000077274	5.06728	4.36262	4.54851	3.90219	4.17025	4.65861	3.85632	4.87693	5.27661	4.00806	5.20387	4.35219	4.43729	4.34893	5.35398	4.63236	3.97306	4.4823	4.43282	3.54526	3.8505
ENSG00000077279	4.30495	5.23015	4.62327	4.16517	4.17025	3.18359	3.85632	3.67184	4.17427	3.74704	4.28886	4.29623	4.18752	4.18782	4.38883	3.0094	3.89599	4.25298	3.27393	3.20335	3.02857
ENSG00000077312	9.18982	9.31684	9.07315	9.04754	9.03475	8.94902	9.06161	9.36778	9.23255	9.02063	9.04026	8.80905	9.0883	8.98883	9.0935	9.1199	9.11383	9.23196	9.09355	9.0604	9.04238
ENSG00000077348	6.42748	5.99165	6.11787	6.10356	6.2989	6.29262	5.92898	6.34441	6.25788	6.07835	6.32432	6.17951	6.41586	6.23422	6.26674	6.7266	6.56898	6.57652	6.82967	6.77327	6.4116
ENSG00000077380	11.1346	11.0144	11.164	11.1139	11.2503	11.1484	11.0675	11.1674	11.1689	11.2388	11.1982	11.2741	11.3454	11.269	11.38	11.5108	11.5549	11.538	11.7446	11.7776	11.7276
ENSG00000077420	8.99841	8.97542	8.96233	8.91979	9.00437	9.14719	8.77629	9.07234	8.80757	9.03046	9.00944	9.10816	9.0653	8.97347	9.20916	9.14032	9.07939	9.10001	9.04404	9.05818	9.07147
ENSG00000077454	10.5982	10.6836	10.5384	10.3682	10.6455	10.5699	10.4665	10.589	10.5438	10.6488	10.647	10.4964	10.6566	10.7219	10.8036	10.8001	10.7281	10.595	10.769	10.898	10.7908
ENSG00000077458	9.26508	9.2627	9.27791	9.29189	9.30787	9.3826	9.383	9.27966	9.39015	9.25456	9.22151	9.23076	8.96446	8.99493	9.06307	8.59661	8.81732	8.72487	8.43356	8.5301	8.33229
ENSG00000077463	8.90737	8.77085	8.66786	8.55722	8.43944	8.76208	8.46989	8.78605	8.62376	8.69878	8.63177	8.54965	8.73882	8.7572	8.86862	9.0922	8.78829	8.95952	9.28372	9.1191	9.19116
ENSG00000077514	7.78913	7.74811	7.78158	7.87763	7.88648	7.98849	7.49208	7.77649	7.64068	7.67431	7.86698	8.06337	7.99439	7.9325	7.73364	7.77887	7.76471	7.97895	7.80944	7.69415	7.80065
ENSG00000077549	12.203	12.1478	12.1626	12.1055	12.2469	12.2431	11.9945	12.3323	12.1422	12.0697	12.0969	12.1298	12.1073	12.0489	12.2289	12.1423	12.0282	12.2192	12.155	12.1136	12.1458
ENSG00000077585	5.70857	5.73314	5.63041	5.60978	6.25368	5.78893	6.15811	6.11918	6.25788	5.41679	5.79191	5.81157	6.41586	6.48021	5.94949	6.38999	6.50554	6.72949	7.78128	7.9974	7.56868
ENSG00000077616	8.86541	8.77944	9.04283	9.02564	8.93446	9.01815	8.93706	8.83634	8.9061	8.88906	8.6977	8.77874	8.58558	8.57372	8.66422	8.32642	8.09719	8.24025	7.67049	7.65354	7.7172
ENSG00000077684	10.0993	9.98888	10.0191	9.94771	10.0013	9.94249	9.978	10.1226	10.0756	10.2216	10.142	10.1058	10.1017	9.99047	10.162	9.88032	9.90447	9.89228	9.4957	9.37422	9.61988
ENSG00000077713	8.74858	8.8007	8.74939	8.96076	8.93804	8.91835	8.82476	8.79243	8.91341	8.75618	8.89795	8.7965	8.96695	8.85771	8.84795	8.97072	9.03739	9.01783	8.98662	8.83253	8.92509
ENSG00000077721	10.3822	10.2692	10.4134	10.5273	10.3887	10.4038	10.6257	10.5072	10.5745	10.3856	10.4519	10.5233	10.4638	10.454	10.5119	10.6808	10.6928	10.7787	10.8117	10.9056	10.8266
ENSG00000077782	8.74016	8.70019	8.53863	8.45441	8.55576	8.46947	8.50005	8.63796	8.34983	8.83961	8.92755	8.64233	8.93685	9.15878	8.85684	9.39199	9.25747	9.11076	10.0323	9.97091	9.85275
ENSG00000077942	10.5838	10.5025	10.5418	10.3348	10.4713	10.5071	10.2318	10.4916	10.4342	10.5484	10.4658	10.5317	10.4173	10.2949	10.537	10.3881	10.3613	10.5536	10.3259	10.3342	10.3627
ENSG00000077943	4.10968	3.51582	2.57968	3.90219	3.42178	4.44571	3.99832	4.42985	3.72046	4.29573	3.74033	3.36785	2.62439	3.26489	3.73872	3.29504	3.53848	3.44023	3.56572	3.90291	3.02857
ENSG00000078018	8.04288	7.74811	8.22729	7.80234	7.90121	8.00155	8.08833	8.05657	8.19653	8.40215	8.36045	8.428	9.27232	9.24322	9.1035	10.1469	10.1791	9.91945	11.3709	11.3797	11.2767
ENSG00000078043	8.27619	8.27724	8.3313	8.40861	8.26814	8.43618	8.46072	8.1931	8.32264	8.37926	8.37126	8.35113	8.39577	8.31063	8.22997	8.35777	8.44368	8.42394	8.53402	8.48453	8.63151
ENSG00000078061	10.9542	10.9439	10.8497	10.9879	10.9005	10.7653	10.8254	10.9648	11.0411	10.8132	10.873	10.7222	10.7399	10.7366	10.914	10.799	10.8279	10.8356	10.939	10.9373	10.7604
ENSG00000078070	9.83254	9.82214	9.91327	9.80715	9.95257	10.0343	9.7808	9.90124	9.67018	9.79975	9.75908	9.75392	9.75449	9.84944	9.8284	9.72819	9.66419	9.63948	9.57372	9.47754	9.58163
ENSG00000078081	4.47691	5.12619	3.45366	4.38752	3.57667	3.35625	4.30208	4.14066	4.17427	4.69229	4.61427	3.82866	5.182	4.91009	4.88259	5.95014	5.66761	5.60379	7.78837	8.27488	7.62863
ENSG00000078114	8.98065	8.949	9.03601	8.88067	8.86851	8.93207	9.20401	8.94634	8.9387	9.18145	9.06712	9.15217	9.58208	9.53252	9.33333	9.7652	9.9057	9.74404	10.122	10.165	10.0483
ENSG00000078124	9.36153	9.45467	9.47496	9.58369	9.32982	9.47448	9.69344	9.514	9.54403	9.63719	9.71519	9.69969	9.91107	9.79453	9.5481	9.88839	9.99734	9.8194	10.2301	10.312	10.2216
ENSG00000078140	11.3251	11.4095	11.5059	11.5107	11.3678	11.4718	11.6382	11.4452	11.5508	11.4561	11.4354	11.5164	11.4816	11.4998	11.4253	11.6044	11.6201	11.512	11.6877	11.6757	11.6772
ENSG00000078142	9.23545	9.34606	9.39454	9.38299	9.44743	9.40244	9.31167	9.33755	9.35032	9.4151	9.42724	9.38625	9.35811	9.26358	9.23668	9.30821	9.3951	9.27658	9.62017	9.37601	9.40624
ENSG00000078177	10.0927	10.1566	10.3948	10.3067	10.1413	10.2385	10.4414	10.1339	10.3193	10.4046	10.3102	10.4871	10.1841	10.2471	10.0972	10.0044	10.141	9.94851	10.0677	10.0602	10.1347
ENSG00000078237	9.27968	9.12222	9.25126	9.35641	9.18381	9.23831	9.49657	9.33973	9.2958	9.14692	9.29608	9.49899	9.48314	9.38734	9.37314	9.14554	9.30694	9.29626	9.4034	9.3891	9.33263
ENSG00000078246	9.27968	9.20646	9.08642	9.08509	9.18682	9.12349	9.12685	9.08019	8.98799	9.31411	9.28294	9.18142	9.16388	9.25851	9.37314	9.55472	9.51593	9.44922	10.0662	10.0887	9.90487
ENSG00000078269	10.5324	10.5025	10.5199	10.3819	10.5505	10.4112	10.3835	10.3763	10.2887	10.7343	10.6613	10.648	10.9479	11.054	10.7605	10.8802	10.9669	10.8859	10.9945	10.9554	11.0043
ENSG00000078304	10.7727	10.8762	10.9851	10.9685	10.9232	10.8521	10.9756	10.8959	10.9162	10.8101	10.8168	10.934	10.6566	10.6761	10.6973	10.5778	10.7003	10.5955	10.5393	10.458	10.5009
ENSG00000078369	12.9223	12.8608	12.9099	12.8502	12.929	12.861	12.8474	12.9785	12.886	12.9799	12.9739	13.0552	13.1027	13.0862	13.1091	13.2955	13.2367	13.2345	13.5659	13.5386	13.5364
ENSG00000078401	5.90208	5.23015	6.06521	5.82794	5.52166	5.69555	5.7598	5.72446	6.16297	5.87518	5.15464	5.963	5.64614	5.05729	5.13745	5.14486	4.96462	5.33694	4.0159	4.05318	4.5469
ENSG00000078403	9.83649	10.0682	9.97701	9.92571	10.035	9.93059	10.0784	9.84093	9.97788	10.1216	10.0406	10.0058	10.0299	10.0087	10.0108	9.93721	10.0505	10.0391	9.90916	9.87451	9.86111
ENSG00000078487	5.26798	5.58415	5.16376	5.51864	5.483	5.59571	5.1172	5.55461	5.40659	5.00301	5.65701	5.37162	5.67074	5.56351	5.90443	5.31425	5.69062	4.93375	5.39902	5.42209	5.95094
ENSG00000078596	3.08855	2.9115	2.85251	3.69579	3.96115	4.00146	3.7797	2.29718	2.82595	3.74704	4.19458	3.47254	2.15191	3.6828	2.93542	0.911912	2.09341	3.73533	3.10244	2.35205	2.6713
ENSG00000078618	12.1853	12.2645	12.3507	12.2925	12.3418	12.3791	12.2854	12.2561	12.1893	12.2247	12.2055	12.2721	12.1611	12.1085	12.1238	12.0248	12.026	11.9981	11.9709	11.8597	11.9145
ENSG00000078668	11.0887	11.1469	11.2991	11.3558	11.2519	11.2537	11.2393	11.3391	11.2881	11.0382	11.1142	11.1992	11.1647	11.1528	11.2217	11.204	11.1759	11.3371	11.2431	11.2191	11.2736
ENSG00000078674	11.3145	11.3232	11.3447	11.123	11.4019	11.473	11.1441	11.1687	11.0602	11.5389	11.4495	11.4685	11.472	11.5131	11.2819	11.3005	11.2853	11.2919	11.292	11.2607	11.3802
ENSG00000078687	9.17428	9.25348	9.25458	8.92571	9.09367	9.21886	8.98903	8.90864	9.04566	9.2249	9.15109	9.12833	9.08144	9.29853	9.00023	9.14258	9.18034	9.10001	9.4292	9.3252	9.33406
ENSG00000078699	9.50754	9.54059	9.6483	9.60784	9.59067	9.68954	9.61706	9.35921	9.59945	9.59476	9.47063	9.60642	9.49352	9.70619	9.41389	9.47118	9.58967	9.39745	9.40633	9.48912	9.44566
ENSG00000078725	4.76937	4.26808	4.20345	4.24316	4.35285	4.28403	3.92907	4.0583	4.44021	3.8394	3.98526	4.69279	3.79863	3.90642	4.25167	2.65288	3.53848	3.73533	2.08824	2.75439	3.3147
ENSG00000078747	10.8444	10.9401	11.0835	11.0525	10.8772	11.0846	11.0983	10.8393	10.973	10.971	11.0024	11.0815	11.0437	11.1078	10.9068	11.0424	11.1497	11.0414	11.2651	11.2404	11.213
ENSG00000078804	10.9496	11.2315	11.1538	11.0194	11.1774	11.0321	11.0418	10.9527	11.0651	10.9023	10.9625	10.9433	10.7457	10.8975	10.926	11.1356	11.0521	10.8896	11.8082	11.8463	11.7253
ENSG00000078808	12.4776	12.523	12.387	12.3792	12.4831	12.4724	12.2964	12.5339	12.3797	12.3484	12.5153	12.3536	12.3019	12.346	12.4539	12.2814	12.1445	12.2289	12.056	12.1158	12.044
ENSG00000078814	3.46055	3.51582	3.60888	2.80304	3.84402	2.76032	3.42464	3.43127	3.42564	3.30397	3.60027	2.85113	3.50239	2.40767	2.93542	2.84213	3.06212	3.64351	2.68268	2.92006	0.922201
ENSG00000078898	3.61584	3.51582	2.24292	4.08273	3.71653	3.35625	3.69879	4.0583	3.72046	2.44311	3.0736	2.99866	2.97972	3.41804	2.93542	2.65288	3.31987	3.20354	1.05942	3.06865	0.922201
ENSG00000078902	11.6021	11.6697	11.6078	11.6379	11.6057	11.5922	11.5893	11.7256	11.725	11.4881	11.619	11.4752	11.4464	11.4678	11.5873	11.5499	11.4901	11.4691	11.4909	11.6248	11.4888
ENSG00000078967	9.07068	9.07302	9.11908	9.13453	9.14099	8.95239	9.13457	9.24749	9.22376	8.98822	8.94576	8.99189	8.94191	8.97963	9.09851	9.15155	9.10315	9.01095	9.2011	9.09547	9.057
ENSG00000079101	5.40208	5.99165	5.86413	5.60978	5.70078	5.75847	5.71935	5.36206	5.36455	5.58629	5.29756	5.47604	4.87845	4.68709	5.54221	4.86835	4.6728	5.4223	4.43282	4.63295	3.43896
ENSG00000079102	3.46055	3.14222	3.08186	1.99623	3.57667	1.10775	2.95264	2.55917	2.55401	2.44311	2.84444	2.28829	2.81297	3.41804	3.10429	2.65288	2.74808	3.64351	3.10244	2.92006	2.6713
ENSG00000079112	3.46055	3.34108	3.27971	3.80268	2.55049	3.77674	3.85632	3.97095	4.26847	3.74704	2.57187	4.17736	3.2646	3.55648	4.10009	4.07619	3.81457	3.20354	3.8083	4.18927	3.3147
ENSG00000079134	9.40477	9.2627	9.46483	9.33705	9.51605	9.37258	9.31676	9.29547	9.25861	9.47211	9.39581	9.3829	9.52758	9.37537	9.37107	9.39578	9.30668	9.29556	9.46947	9.26101	9.3559
ENSG00000079150	7.36536	7.02432	7.29061	7.37004	7.12373	7.29405	7.50997	7.31791	7.70105	7.20416	7.1987	7.38602	6.9151	7.09428	7.38581	7.0673	6.98642	7.0216	6.15919	6.41908	6.48551
ENSG00000079156	8.13565	8.28932	8.4335	8.24291	8.28509	8.46004	8.34584	8.19792	8.27805	8.34422	8.36045	8.3682	8.30442	8.39148	8.09614	8.185	8.28271	7.95049	7.92978	7.76666	7.80643
ENSG00000079215	7.37626	7.57135	7.42205	7.5949	7.62762	7.40636	7.48002	7.50054	7.61402	7.36039	7.29271	7.38602	7.26119	6.9384	7.07623	6.34376	6.42553	6.67256	5.94742	5.44946	5.05399
ENSG00000079246	12.1923	12.0833	12.2455	12.1239	12.248	12.2778	12.0192	12.2856	12.0795	12.2174	12.2332	12.2975	12.2612	12.2172	12.2644	12.3284	12.265	12.337	12.5306	12.5036	12.5
ENSG00000079257	6.24914	6.13247	6.50152	6.42129	6.56259	6.39518	6.4203	6.39562	6.0348	5.91817	6.02891	6.26944	6.22977	6.27491	6.28443	6.27973	6.28147	6.34836	6.02152	6.2426	6.01224
ENSG00000079263	3.11379	3.82431	3.30718	2.58796	3.75727	4.02315	2.27359	2.59233	2.50222	3.41738	3.33101	3.91218	2.72176	2.42223	3.41814	2.45834	2.8772	3.74508	4.07185	4.88706	4.93831
ENSG00000079277	10.3397	10.4169	10.3583	10.2081	10.3822	10.4415	10.3852	10.1918	10.2971	10.4456	10.2989	10.2944	10.3079	10.4169	10.2614	10.3776	10.284	10.2278	10.3667	10.2723	10.2684
ENSG00000079308	9.87928	10.0873	9.89829	9.70578	9.94192	9.87843	9.69995	9.63614	9.73142	9.83943	9.74875	9.54773	9.29623	9.42366	9.29239	8.94772	9.05522	8.87877	9.79584	10.0219	9.68093
ENSG00000079313	9.91711	9.93989	9.71391	9.60968	9.90035	9.81694	9.65106	9.65903	9.5858	9.98806	10.1132	9.80243	10.064	10.1589	10.0082	10.2736	10.1483	10.0889	10.4805	10.5823	10.4965
ENSG00000079332	11.2337	11.3335	11.4601	11.5443	11.3915	11.3965	11.5018	11.4857	11.5619	11.4312	11.2883	11.3947	11.2544	11.2024	11.2797	11.2606	11.2309	11.2522	11.356	11.3735	11.3264
ENSG00000079335	7.511	7.46882	7.59917	7.70235	7.57345	7.51967	7.74474	7.58386	7.67549	7.82874	7.63541	7.95461	7.77942	7.5152	7.64741	7.79614	7.78622	7.68287	8.17677	8.04303	7.71105
ENSG00000079337	3.61584	3.51582	3.60888	2.80304	2.8223	2.49067	3.08589	3.67184	3.05467	2.66124	4.19458	1.7359	3.12918	2.08053	3.25546	3.99875	3.81457	4.4283	4.57083	5.04539	4.17033
ENSG00000079385	10.2342	10.0769	10.1949	10.0917	10.2065	10.1649	10.1178	10.237	10.3546	10.334	10.2932	10.3894	10.5665	10.5565	10.5407	10.9513	10.945	10.7753	11.282	11.2974	11.303
ENSG00000079387	8.56538	8.42147	8.68541	8.77305	8.43438	8.7113	8.85542	8.59112	8.56928	8.76504	8.67606	8.95848	8.67946	8.75361	8.69761	8.90326	8.72007	8.75535	8.82013	8.64108	8.74721
ENSG00000079393	4.76937	4.76001	4.38627	5.20456	5.22641	4.00146	4.50609	5.17929	4.07349	5.35555	5.05084	5.07177	5.7421	5.85939	6.21232	7.14123	6.8398	6.53879	7.71583	7.7936	7.70488
ENSG00000079432	11.5555	11.6898	11.4804	11.3214	11.5354	11.3443	11.3511	11.4366	11.3977	11.6984	11.6675	11.485	11.6092	11.716	11.6199	11.6355	11.6338	11.5824	11.6782	11.6808	11.6356
ENSG00000079435	5.67363	5.99165	5.16376	5.3874	5.44328	5.69555	5.37329	5.2552	5.67086	5.78516	5.79191	5.45064	5.76512	5.77682	5.88137	5.88707	6.01608	5.94883	5.89582	6.51287	6.36537
ENSG00000079459	13.5109	13.6958	13.7036	13.6629	13.7906	13.8264	13.5755	13.7669	13.6888	13.4731	13.5178	13.5562	13.4436	13.4468	13.5081	13.5245	13.4662	13.486	13.5105	13.4332	13.4347
ENSG00000079462	8.5365	8.42695	8.04896	8.29419	8.29069	7.94857	8.17688	8.46494	8.61033	8.30832	8.34407	8.35798	8.35841	8.28596	8.65064	8.91384	8.70884	8.92825	8.80971	8.85317	8.75321
ENSG00000079482	7.26332	7.23891	7.49353	7.41285	7.11111	7.2065	7.61293	7.07774	7.48262	7.27202	7.35941	7.41258	7.47178	7.18246	7.24835	7.67068	7.61645	7.5374	7.37315	7.32456	7.34075
ENSG00000079557	10.9441	11.1886	11.157	11.274	11.3671	11.3866	11.1191	11.2653	11.2475	10.8989	10.9059	11.0439	10.2722	10.2535	10.5119	9.92287	9.86078	9.99337	9.07337	8.96407	9.09763
ENSG00000079616	7.95833	7.84135	7.70621	8.01735	7.60979	7.65811	7.82794	7.75704	7.92727	8.00358	7.75584	7.95009	7.61806	7.74252	7.82109	7.62631	7.36087	7.73941	7.14906	7.24089	7.22468
ENSG00000079689	6.54811	6.64624	6.80428	6.87765	6.89256	6.43424	6.96112	6.62752	6.78966	6.27307	6.25594	6.22517	6.2945	6.44499	6.68154	6.38999	6.36962	5.94883	6.45496	6.49984	6.36537
ENSG00000079691	8.88845	8.55259	8.60469	8.44619	8.5036	8.42168	8.32913	8.56526	8.53179	8.6926	8.62727	8.77874	8.79583	8.79965	8.68435	8.78138	8.81732	8.77981	8.9586	9.00153	8.91709
ENSG00000079739	10.7926	10.8265	10.8757	10.919	10.8473	10.8616	10.9426	10.9108	10.9103	10.8132	10.8286	10.9134	10.7786	10.7601	10.8685	10.7024	10.6978	10.8021	10.3797	10.3073	10.387
ENSG00000079785	10.8078	10.812	10.9402	10.8412	10.9474	11.0096	10.7152	10.9225	10.8208	10.9228	10.9069	10.9467	11.001	10.969	10.94	10.9875	10.919	11.022	10.993	10.9948	11.0112
ENSG00000079805	12.1437	12.2468	12.0455	11.9253	12.1298	12.0975	11.8178	12.0256	11.919	12.1169	12.1746	12.0337	12.1067	12.1562	12.1795	12.1165	12.0296	12.0395	12.0808	11.9457	12.0184
ENSG00000079819	8.78995	8.45404	8.62303	8.29876	8.52279	8.40702	8.34916	8.50435	8.50301	8.93688	8.57209	8.67835	8.72127	8.78915	8.66084	8.79289	8.745	8.86867	9.3994	9.38666	9.50373
ENSG00000079931	3.88379	4.68881	3.45366	4.63902	4.58958	3.77674	4.06441	4.42985	3.96513	4.29573	4.37734	4.17736	3.96696	3.79894	4.92832	4.52597	4.36495	4.68012	4.69679	4.85386	4.79961
ENSG00000079950	10.7419	10.5409	10.7258	10.722	10.7034	10.7255	10.772	10.6961	10.7983	10.8915	10.7552	10.9591	10.9592	10.9048	10.8816	11.0885	11.1621	11.0926	11.2502	11.278	11.3675
ENSG00000079974	8.74375	8.8544	8.6373	8.63613	8.81994	8.72109	8.85341	8.59679	8.66902	9.01868	8.75716	8.53905	8.85514	9.02431	8.7446	8.93437	8.84188	8.78981	8.84245	8.69513	8.65752
ENSG00000079999	10.9192	10.8255	10.6384	10.6815	10.795	10.7461	10.6271	10.9319	10.7683	10.8868	11.003	10.854	11.1319	11.1412	11.2597	11.4083	11.2392	11.3901	11.6262	11.6901	11.5982
ENSG00000080031	8.46679	8.39375	8.36436	7.94918	8.39328	8.38227	8.07236	8.43261	8.17236	8.67077	8.2938	8.46336	8.79862	8.67219	8.55185	9.15155	9.27849	9.09134	10.3679	10.4564	10.0797
ENSG00000080166	3.75603	3.51582	2.24292	3.16545	3.71653	2.15875	3.32032	2.97291	2.55401	2.66124	2.84444	3.1325	2.15191	1.05418	0.96345	3.29504	0.86147	0.864901	1.05942	2.5672	1.88167
ENSG00000080189	10.2843	10.2477	10.2327	10.2226	10.2242	10.0889	10.3316	10.3742	10.3343	10.1388	10.1794	10.2032	10.1208	10.2057	10.1928	10.1998	10.2113	10.2049	10.2585	10.3278	10.1976
ENSG00000080200	7.89907	7.96704	8.08907	8.0339	8.14973	8.04637	8.23184	7.89986	8.05171	8.11401	8.17539	8.25534	8.2319	8.35874	7.83316	7.81885	8.17265	8.02061	8.20884	8.33847	8.36399
ENSG00000080224	5.44415	4.61391	4.20345	4.90202	4.91408	4.19585	4.5982	4.9242	4.85886	5.35555	4.53954	4.93189	4.3178	4.56117	4.78655	4.91125	4.80515	5.08102	4.63518	4.5844	4.43196
ENSG00000080298	7.8134	7.83312	8.04216	8.11393	8.02073	8.04637	8.04807	7.9578	7.99083	8.28798	8.09286	8.1006	7.98462	7.90036	8.03475	8.05714	8.11005	7.85137	8.15499	8.17184	8.14884
ENSG00000080345	9.94301	9.88321	10.137	9.99497	9.97015	10.0689	10.0501	9.8968	10.0174	10.2481	10.0708	10.2314	10.301	10.3755	10.0579	10.1933	10.394	10.1496	10.6681	10.6136	10.6181
ENSG00000080371	10.4991	10.6063	10.6088	10.6334	10.5931	10.5599	10.8074	10.6634	10.747	10.6029	10.6569	10.7947	10.6492	10.6714	10.5931	10.7107	10.7925	10.6753	11.1235	11.0229	11.0507
ENSG00000080493	7.02081	6.56904	6.85169	7.10353	6.86276	6.77583	7.15557	6.92344	7.14046	7.22143	7.08505	7.47691	7.55341	7.53208	7.51131	7.83565	8.09719	8.08747	8.09333	7.97874	8.27924
ENSG00000080503	10.686	10.7499	10.6597	10.5008	10.7139	10.7196	10.4599	10.645	10.4086	10.7062	10.8207	10.7069	10.7165	10.7583	10.5806	10.503	10.5539	10.5449	10.1471	10.1146	10.2934
ENSG00000080546	10.3944	10.5295	10.5309	10.5332	10.4836	10.5533	10.4948	10.4518	10.5548	10.3692	10.2278	10.4387	10.2032	9.97666	10.1822	9.67473	9.79862	9.87472	9.00195	8.75514	9.00768
ENSG00000080561	7.67011	7.54135	7.55211	7.54958	7.60079	7.56438	7.29972	7.49273	7.37027	7.72361	7.5712	7.63188	7.87247	7.70579	7.76548	7.84674	8.00386	7.68863	8.37352	8.35665	8.23279
ENSG00000080573	4.47691	4.68881	4.46967	4.24316	4.91408	4.90098	4.84376	5.21775	3.72046	4.53547	4.75304	4.40605	4.79141	5.46146	5.24978	5.18037	3.43332	3.73533	3.56572	3.06865	3.93735
ENSG00000080603	10.4901	10.6586	10.6398	10.4034	10.6081	10.5246	10.5203	10.2758	10.262	10.8423	10.844	10.5794	10.7392	11.0795	10.7468	10.7854	10.8435	10.6748	10.8647	10.8956	10.9865
ENSG00000080608	8.75695	8.6259	8.58613	8.71949	8.83437	8.59975	8.49707	8.78924	8.46373	8.85074	8.72746	8.81653	9.08144	9.0633	9.04503	9.49429	9.46681	9.49098	10.0879	10.0811	10.1104
ENSG00000080618	12.3496	12.4592	12.6411	12.6692	12.5722	12.6602	12.5503	12.657	12.6422	12.2637	12.2841	12.474	12.1362	12.0196	12.2739	11.924	11.8523	12.003	10.9611	10.7193	11.0249
ENSG00000080709	2.85904	3.34108	2.85251	2.3179	3.05093	1.72691	2.80582	2.29718	2.21862	2.85068	2.57187	2.50124	2.40741	3.55648	3.73872	3.0094	2.56104	2.92024	2.41586	2.5672	1.48027
ENSG00000080802	9.39676	9.39441	9.52699	9.54379	9.60873	9.52964	9.54656	9.62903	9.50344	9.62913	9.61865	9.6021	9.62519	9.62	9.57889	9.66222	9.7638	9.59268	9.81159	9.72436	9.71973
ENSG00000080815	11.2902	11.2686	11.5383	11.4883	11.2824	11.4337	11.5599	11.431	11.5038	11.3697	11.3949	11.4792	11.4637	11.5136	11.4574	11.6311	11.7362	11.5966	11.9218	11.9373	11.8878
ENSG00000080819	8.84985	8.73595	8.95512	9.01178	9.0247	8.79622	9.16124	8.94347	8.96003	8.9421	9.00944	8.94262	9.06993	8.851	8.82093	8.79862	9.07284	8.82231	8.54243	8.7823	8.57507
ENSG00000080822	10.0128	9.94563	10.1841	10.2653	10.0713	10.0071	10.2796	10.1942	10.2845	10.0425	10.0372	10.1038	10.1659	10.1328	10.0947	10.4116	10.4482	10.3307	11.0128	11.1064	10.9055
ENSG00000080823	6.74605	6.40101	6.44081	6.40442	6.48646	6.74508	6.62028	6.37875	6.4103	6.32191	6.25594	6.31238	6.09088	6.39049	6.13643	5.57657	5.71326	5.4223	5.01965	4.31362	4.60111
ENSG00000080824	14.6638	14.5648	14.6821	14.6275	14.7342	14.7464	14.6072	14.7908	14.6137	14.8841	14.8586	14.8839	15.2719	15.3677	15.1971	15.7852	15.7303	15.6367	16.3594	16.4002	16.271
ENSG00000080839	6.09924	6.46633	6.5212	6.50282	6.70375	6.24947	6.72615	6.58402	6.54814	6.69995	6.47229	6.66145	6.31024	6.58099	5.78524	5.95014	6.10437	6.36282	6.15919	6.077	6.42669
ENSG00000080845	11.6148	11.4067	11.3983	11.3056	11.4038	11.306	11.2785	11.4911	11.4241	11.672	11.6104	11.5927	11.897	11.9305	11.8758	12.2817	12.1898	12.1152	12.832	12.8549	12.7392
ENSG00000080854	4.70162	4.36262	4.29776	4.16517	3.71653	3.89347	3.92907	4.3628	4.35689	5.04241	4.28886	4.69279	4.54764	4.74616	4.62931	4.99339	4.88709	4.25298	5.15749	5.30712	5.05399
ENSG00000080910	6.27314	6.84157	6.97313	6.92693	7.06435	7.0542	7.12864	7.00585	7.14171	6.2641	6.40631	6.78135	5.19664	5.52084	6.41222	5.80187	5.53105	5.92368	4.59174	4.8514	5.3065
ENSG00000080986	5.31408	4.89267	4.62327	4.51875	4.17025	4.19585	4.80563	5.46154	4.35689	5.15451	4.93898	4.45797	4.5998	3.55648	4.45281	3.53337	4.36495	4.53436	3.8083	4.372	4.24032
ENSG00000081014	8.8222	8.75786	8.92218	8.84047	8.71435	8.86217	8.91708	8.85476	8.83861	8.88906	8.88668	8.97193	8.96446	8.70977	8.73347	8.69502	8.77221	8.68512	8.61603	8.61413	8.68268
ENSG00000081019	8.61225	8.55759	8.75771	8.87456	8.7994	8.75052	8.91484	8.46494	8.78782	8.78549	8.5674	8.84606	8.66423	8.81352	8.80569	8.67338	8.79892	8.67646	8.81666	8.87099	8.89285
ENSG00000081026	9.40743	9.62407	9.51967	9.35472	9.49677	9.58493	9.14032	9.40991	9.22082	9.50949	9.45037	9.40291	9.4337	9.49212	9.33545	9.13355	9.25554	9.23786	9.2635	9.25908	9.25384
ENSG00000081041	9.07403	8.57744	8.81464	8.81196	8.76291	8.59113	8.84744	9.09635	9.00861	8.81991	8.6934	8.75818	8.27264	8.089	8.52977	7.97864	7.99433	8.21256	7.74529	7.97404	7.97499
ENSG00000081051	20.0607	20.0585	20.0888	20.0518	20.1787	20.1758	19.9155	20.1474	20.0098	19.9306	19.9802	20.0452	19.7494	19.6765	19.8225	19.5658	19.5138	19.689	19.2588	19.1943	19.2668
ENSG00000081059	7.39783	7.25132	6.9566	6.54961	7.36604	7.32556	6.70559	7.23598	6.98266	6.97906	7.21079	7.13006	7.30898	7.33454	7.16486	7.66443	7.66371	7.54376	8.39226	8.38882	8.31617
ENSG00000081087	8.54135	8.3655	8.69844	8.65319	8.36698	8.43136	8.62848	8.61293	8.68909	8.73229	8.60911	8.80655	8.79023	8.66838	8.71728	9.14482	9.29735	9.09134	9.87292	9.96143	9.83165
ENSG00000081148	6.17614	6.26075	6.35567	6.37007	5.8601	6.52751	6.60926	5.90024	6.69106	6.28953	6.13424	5.92661	5.89605	5.68923	5.70869	5.82112	5.92203	5.36596	5.24258	4.63295	5.01458
ENSG00000081154	11.0543	11.0157	11.2667	11.1817	11.233	11.1672	11.3386	11.3397	11.1996	11.1584	11.1254	11.308	11.2523	11.1218	11.1892	11.2164	11.1911	11.2336	11.399	11.3523	11.3253
ENSG00000081177	9.4724	9.46802	9.61891	9.5283	9.53507	9.45086	9.56522	9.46289	9.59264	9.43003	9.44782	9.64893	9.61096	9.57997	9.62648	9.65751	9.6289	9.59268	9.41781	9.41123	9.27275
ENSG00000081181	8.04288	7.63902	7.89153	8.13964	7.52671	7.71474	8.1275	7.9349	8.30608	7.78296	8.1692	8.1839	8.39208	8.37286	8.4922	9.32813	9.1053	9.14674	10.91	11.1995	10.8379
ENSG00000081189	4.30495	3.51582	4.88868	4.00695	5.02587	3.64972	4.95247	4.67064	4.26847	4.08553	4.68532	4.17736	4.25413	3.26489	4.25167	3.29504	3.72828	4.05338	2.90777	3.82146	4.37087
ENSG00000081307	10.4953	10.4415	10.4173	10.5912	10.5726	10.5477	10.5149	10.4518	10.5336	10.377	10.4378	10.4555	10.4407	10.3731	10.3669	10.1413	10.141	10.2229	9.97435	9.98734	9.9156
ENSG00000081320	7.02081	6.71952	7.20802	6.93752	7.09838	6.89263	7.28594	7.3001	7.27136	7.15109	7.14929	7.10585	7.39268	7.45451	7.20256	7.20296	7.62244	7.64786	7.92978	7.64173	7.92274
ENSG00000081377	9.74688	9.75179	9.88506	9.94037	9.8518	9.90299	9.95965	9.74875	9.85232	9.89158	9.79159	9.90298	10.0251	9.9782	9.97447	10.1129	10.0659	9.86455	9.82887	9.75069	9.86937
ENSG00000081386	8.57013	8.65421	8.57675	8.62797	8.71851	8.77736	8.60647	8.47291	8.46373	8.68017	8.66731	8.60827	8.49552	8.49412	8.33556	8.05714	8.24436	8.18025	7.99866	7.72247	8.18921
ENSG00000081479	5.17112	5.32712	5.95376	5.58003	5.91921	5.81876	5.92898	5.72446	5.83379	5.91817	6.08254	6.01592	5.51646	5.85939	5.88137	5.24886	5.46908	5.67508	4.63518	4.372	4.65335
ENSG00000081692	9.17428	9.15455	8.92588	9.05297	8.99409	8.96912	8.88544	9.15144	9.12019	8.98569	9.11937	9.01374	9.19812	9.15606	9.38138	9.50308	9.48501	9.47108	9.52784	9.56927	9.53191
ENSG00000081721	8.46168	8.23412	8.30315	8.28038	8.42931	8.22963	8.46072	8.47291	8.38706	8.26318	8.44478	8.4538	8.35841	8.45039	8.43395	8.77558	8.60068	8.68512	8.50418	8.69638	8.65412
ENSG00000081760	9.91897	10.0182	10.0346	10.0394	9.94725	9.89952	9.85969	9.91447	9.93902	9.90367	9.93885	9.87106	9.86918	9.99656	9.87439	10.0362	10.0191	9.93647	10.2813	10.3669	10.3975
ENSG00000081791	10.5275	10.6076	10.5704	10.5912	10.5783	10.5786	10.5671	10.6093	10.6143	10.4846	10.5444	10.4603	10.5071	10.4417	10.4229	10.3613	10.4304	10.3742	10.3879	10.4032	10.3005
ENSG00000081803	9.65138	9.51509	9.49997	9.5986	9.60424	9.67941	9.44012	9.48867	9.54167	9.46307	9.46307	9.69022	9.32169	9.25343	9.369	9.19125	9.19851	9.25928	8.9586	8.66463	8.74721
ENSG00000081818	4.83787	4.05811	4.39142	4.64248	4.74665	4.45029	4.94932	4.21857	4.44425	4.64496	4.3859	4.11663	3.88693	4.96781	4.1809	3.9763	4.35519	4.22665	4.0188	4.31779	4.37336
ENSG00000081842	3.08855	1.72662	3.67644	2.58077	3.13512	2.54593	2.10799	2.95116	1.65259	2.53214	3.32924	3.21207	2.97972	4.30009	3.31588	3.64127	4.89504	3.55657	2.09191	2.92006	3.51886
ENSG00000081870	8.47696	8.33667	8.54826	8.70922	8.59254	8.48816	8.62575	8.54272	8.45374	8.25062	8.1692	8.47916	8.30442	8.17211	8.28812	8.21527	8.26749	8.53031	8.17677	8.22031	8.40266
ENSG00000081913	9.45707	9.76054	9.56541	9.60045	9.64639	9.5431	9.57375	9.4926	9.65936	9.71391	9.51031	9.6021	9.29029	9.38004	9.40584	8.92435	9.06185	8.96901	8.78155	8.82472	8.68582
ENSG00000081923	9.81661	9.79485	9.91699	9.91978	9.7879	9.97432	9.87012	9.82856	9.95682	9.9956	10.0132	9.99267	10.0023	10.0764	9.88892	9.97687	9.9155	9.92067	10.1065	10.1619	10.0725
ENSG00000082014	9.31127	9.06249	8.89604	8.85916	9.1191	8.99874	8.74137	9.01345	8.93152	9.03046	8.86006	8.84362	8.98667	8.78915	8.76532	8.77268	8.78295	8.98547	8.76007	8.73304	8.65091
ENSG00000082068	8.8543	8.949	9.07315	8.98082	9.16311	9.01171	8.8152	9.00248	8.81781	8.99576	9.17289	9.11424	9.03348	9.01795	9.09708	9.02787	8.92308	9.0797	8.85094	8.90267	9.06587
ENSG00000082146	11.0577	11.0819	11.2607	11.2792	11.2047	11.1688	11.3104	11.2475	11.237	10.9425	11.0568	11.0965	10.8606	10.7973	10.9726	10.8115	10.7919	10.8463	10.4449	10.4296	10.5189
ENSG00000082153	12.4749	12.4242	12.6257	12.6897	12.5521	12.6255	12.6873	12.5879	12.661	12.4572	12.5049	12.6335	12.495	12.4298	12.3746	12.5242	12.5544	12.5571	12.881	12.9235	12.8595
ENSG00000082196	6.59405	6.75114	6.75792	6.77545	6.63683	6.61086	6.82944	6.33814	6.90575	6.89548	6.71676	6.54624	6.64414	6.7636	6.72144	6.27989	6.66525	6.57652	6.36162	5.8287	6.21061
ENSG00000082212	10.5409	10.6713	10.7226	10.7398	10.7661	10.8106	10.712	10.637	10.6377	10.4234	10.4983	10.6487	10.5062	10.3483	10.3237	10.3041	10.2877	10.3876	10.5077	10.3997	10.2892
ENSG00000082213	9.32822	9.30498	9.5559	9.42124	9.39374	9.37006	9.49657	9.45084	9.45919	9.47391	9.39845	9.54172	9.3139	9.42818	9.23668	9.42011	9.37572	9.28989	9.37605	9.22781	9.31594
ENSG00000082258	10.3073	10.4361	10.5162	10.4636	10.4994	10.4863	10.603	10.4867	10.4418	10.6752	10.4933	10.6417	10.5697	10.504	10.4209	10.5504	10.7445	10.5015	10.8195	10.7137	10.7356
ENSG00000082269	9.07068	9.03763	9.1223	9.1294	8.90552	9.15306	9.09953	9.06181	9.05561	9.23556	9.24522	9.38793	9.27232	9.25343	9.17874	9.33209	9.35967	9.29178	9.9205	10.0299	9.87079
ENSG00000082397	10.1462	10.1762	10.1561	9.88675	10.1644	10.2371	9.85969	10.1502	9.87309	10.2075	10.1545	10.1637	10.4699	10.5688	10.3606	10.6037	10.6302	10.5449	10.9953	10.9773	10.942
ENSG00000082438	10.8699	10.9111	10.9218	10.9041	10.9412	10.9843	10.7508	10.8176	10.8946	10.8834	10.8364	10.9093	10.5852	10.3813	10.4017	10.1311	10.2811	10.2552	10.3161	10.3687	10.1766
ENSG00000082458	9.62191	9.73426	9.56778	9.41704	9.69159	9.66306	9.52471	9.53889	9.52507	9.63236	9.61638	9.53267	9.71365	9.55953	9.735	9.7564	9.788	9.71614	9.90916	9.9507	9.80592
ENSG00000082512	5.63783	5.66057	5.51735	5.08258	5.63178	5.33175	5.98123	5.46154	5.52582	6.05928	5.42758	5.75042	6.31024	6.48021	6.21232	6.97932	6.75505	6.30406	7.43772	7.54355	7.13566
ENSG00000082515	9.75945	9.56565	9.6727	9.79101	9.71472	9.79272	9.52031	9.8035	9.7064	9.27537	9.37178	9.62925	9.448	9.26862	9.65396	9.59967	9.54934	9.69914	9.43599	9.36706	9.5126
ENSG00000082516	8.97708	9.15785	9.22188	9.05567	9.08724	9.16472	9.02058	9.0189	9.14213	9.40191	9.36097	9.24376	9.3713	9.21736	9.21378	9.44769	9.35427	9.46774	9.28622	9.35807	9.3967
ENSG00000082556	9.57061	9.67562	9.5559	9.83732	9.68096	9.5871	9.75977	9.70881	9.80399	9.52695	9.56785	9.68205	9.61255	9.56159	9.50348	9.35557	9.43821	9.33462	8.99584	9.04254	9.14629
ENSG00000082641	12.9753	13.1806	13.0524	12.8348	13.0833	13.0745	12.7989	12.9288	12.8289	13.096	13.0656	12.9659	12.9941	12.9879	12.9166	12.83	12.7737	12.8081	13.0258	13.0609	12.9738
ENSG00000082684	2.58599	3.14222	2.57968	1.99623	3.71653	2.49067	1.99866	2.55917	2.21862	3.0181	3.60027	2.28829	3.50239	3.90642	3.10429	2.84213	2.91363	2.56737	2.08824	0.864807	1.88167
ENSG00000082701	11.1255	11.0166	11.1726	11.0359	10.9403	10.9893	11.2118	11.0405	11.2153	11.1534	11.1366	11.1815	11.0812	11.1778	10.9635	11.0667	11.132	10.9496	11.1852	11.2422	11.26
ENSG00000082781	11.3391	11.3816	11.1428	11.2238	11.3165	11.2994	11.1711	11.3974	11.246	11.3827	11.3769	11.3507	11.3706	11.3584	11.4372	11.5142	11.5039	11.5026	11.7751	11.834	11.7386
ENSG00000082805	10.1302	10.2179	10.1639	10.0325	10.055	10.2163	10.0378	10.0578	9.9046	10.327	10.3116	10.2051	10.2283	10.3507	10.1428	10.1987	10.234	10.0324	10.4462	10.3606	10.3715
ENSG00000082898	11.6228	11.6783	11.7657	11.7722	11.657	11.6633	11.8121	11.6065	11.7466	11.8536	11.7011	11.7643	11.8931	11.8922	11.7365	11.8755	12.0392	11.8519	12.2053	12.1325	12.1126
ENSG00000082996	9.8226	9.85707	10.1081	9.95642	9.99268	9.99569	10.0764	9.8864	9.99176	9.89966	9.94248	9.9559	9.73858	9.76449	9.82085	9.79985	9.85824	9.81415	9.84088	9.79673	9.77235
ENSG00000083067	4.39349	3.67166	4.54851	4.99512	4.91408	4.00146	4.5982	5.13979	4.73235	4.47917	3.98526	4.6034	4.49352	4.74616	5.0574	4.21961	4.36495	4.76971	2.90777	2.35205	3.17872
ENSG00000083093	8.11627	8.05461	8.00071	8.00061	8.00717	8.32625	8.09625	8.01896	7.94877	8.06225	8.06648	8.06337	8.29654	8.29093	8.19766	8.26573	8.15208	8.13038	8.20355	8.06088	8.05485
ENSG00000083097	9.46475	9.4627	9.45719	9.62797	9.43988	9.51604	9.69605	9.34842	9.73555	9.64201	9.51519	9.66144	9.59016	9.6081	9.49401	9.26958	9.42284	9.288	9.06171	9.00153	9.1689
ENSG00000083099	9.70859	9.70524	9.75188	9.82628	9.90584	9.75078	9.75222	9.75203	9.65501	9.78966	9.71943	9.9274	9.70027	9.81192	9.7494	9.80981	9.81833	9.7916	9.90753	9.80735	9.84996
ENSG00000083123	9.27968	9.56067	9.65277	9.71778	9.51605	9.60219	9.60184	9.61469	9.59036	9.20551	9.20951	9.42427	9.02771	8.89081	8.96501	8.50156	8.66596	8.87877	8.04677	7.9974	7.94387
ENSG00000083168	10.2417	10.2148	10.145	9.89584	10.1319	10.1445	9.86896	9.95202	9.80399	10.3663	10.2572	10.1539	10.254	10.3109	9.9948	10.1998	10.2043	10.1105	10.4707	10.5215	10.4794
ENSG00000083223	9.71504	9.69619	9.67929	9.56862	9.77795	9.79647	9.47091	9.62724	9.62861	9.96518	9.72997	9.932	9.79	9.97048	9.71067	9.90042	9.79199	9.84023	10.1178	10.2097	10.1998
ENSG00000083290	9.64463	9.56565	9.65722	9.67093	9.7477	9.73913	9.70902	9.58742	9.62193	9.6388	9.66992	9.59342	9.70475	9.79803	9.54443	9.76957	9.83262	9.67615	9.60217	9.69607	9.52317
ENSG00000083307	5.96121	5.76811	5.00508	5.24303	5.07868	5.10843	5.08573	5.2917	5.27661	5.2916	5.85491	5.59676	5.7421	5.9375	5.51249	6.37474	6.62975	6.2428	7.19248	7.13531	7.13566
ENSG00000083312	11.85	11.783	11.9826	12.0469	11.8388	11.9256	12.0355	11.9672	12.1104	12.0843	11.99	12.1544	12.0988	12.0804	11.9449	12.1053	12.2925	12.149	12.4555	12.4447	12.3991
ENSG00000083444	12.2352	12.274	12.2407	12.2032	12.2509	12.2321	12.1794	12.2819	12.2286	12.1435	12.2556	12.1371	12.0653	12.0747	12.1745	12.0972	12.0398	12.1162	11.9616	11.9276	11.9185
ENSG00000083454	4.48499	4.19802	4.80252	5.1987	4.77892	5.04725	4.71883	4.64265	4.87273	4.43249	4.3782	4.57969	4.80258	4.76912	3.71282	4.95823	3.51083	4.38813	3.6921	2.84785	4.39684
ENSG00000083457	8.32766	8.52219	8.31447	8.47476	8.53229	8.44099	8.46989	8.34413	8.4884	8.04781	8.382	8.21442	8.18572	8.20407	8.09614	8.08082	8.05793	8.27126	7.8164	7.86139	8.0837
ENSG00000083520	9.96304	10.1316	10.1307	10.1152	10.2416	10.0965	10.0982	10.2451	10.103	10.132	10.1003	10.2239	10.1308	10.0807	10.0188	10.1334	10.0835	10.1212	10.321	10.3232	10.2726
ENSG00000083535	8.03602	8.24036	8.37522	8.1498	8.38282	8.34175	8.1275	8.09839	8.01141	8.15502	8.13154	8.42474	8.30049	8.30081	8.15982	8.15854	8.19695	8.16381	8.3593	8.28251	8.1073
ENSG00000083544	8.44624	8.35978	8.45413	8.31239	8.49877	8.46476	8.17688	8.42851	8.27805	8.56316	8.39265	8.39508	8.53624	8.51125	8.55914	8.48391	8.47383	8.33134	8.40616	8.36746	8.33629
ENSG00000083635	7.74774	7.91253	7.6084	7.76317	7.56404	7.58153	7.67749	7.78931	7.80639	7.80603	7.70545	7.71953	7.91411	8.00067	8.14014	8.05236	8.15622	7.9742	8.27567	8.19624	8.37173
ENSG00000083642	9.64012	9.74087	9.64157	9.6674	9.60873	9.8462	9.64162	9.66426	9.55342	9.96646	9.67865	9.78093	9.82329	9.8695	9.70739	9.66693	9.5912	9.59575	9.67285	9.48747	9.63132
ENSG00000083720	6.31863	6.04964	6.72163	6.18486	5.91921	6.20498	6.15811	6.11918	6.28067	6.62409	6.23241	6.25483	6.66877	6.14925	6.4966	6.26326	6.3838	5.98669	6.9099	6.95611	6.98072
ENSG00000083750	8.04288	8.3191	8.09565	8.06107	8.18628	8.38725	8.18433	8.26371	8.11012	8.20795	8.07312	8.08417	8.09323	7.91973	8.21159	8.16742	8.13122	7.88183	8.17136	7.99276	7.98012
ENSG00000083799	9.98814	9.91671	10.0751	9.91681	9.92219	9.90822	10.0327	9.88192	10.0608	10.0031	9.98359	9.99816	9.67618	9.74472	9.642	9.49252	9.69721	9.58345	9.84088	9.80602	9.89405
ENSG00000083807	8.02221	8.11016	7.92884	8.0339	7.99349	7.962	8.07637	8.15398	8.06489	7.59705	7.88219	7.91336	7.43636	7.53208	7.48094	7.54011	7.37514	7.67129	6.88365	6.97506	6.96012
ENSG00000083812	7.44406	7.38188	7.55707	7.60609	7.80608	7.73028	7.32461	7.53947	7.3301	7.71711	7.41367	7.57811	7.46083	7.86122	7.74448	7.61481	7.73647	7.59074	7.92438	7.79018	7.63677
ENSG00000083814	7.88387	7.58121	7.84543	7.90188	7.73021	7.79946	7.67241	7.66958	7.78313	7.70532	7.69688	7.50187	7.49951	7.21419	7.5188	7.1943	7.16948	7.2644	6.55815	6.60093	6.8071
ENSG00000083817	7.41908	7.40361	6.86715	7.30788	7.25571	6.97442	7.27899	7.41212	7.45284	7.14206	7.14929	7.34524	7.33229	7.15002	7.03502	7.07675	7.19383	7.2949	7.25525	7.20119	6.98072
ENSG00000083828	6.79791	6.73727	6.6029	6.88983	6.65242	6.80816	6.60115	6.97273	6.68013	6.84123	6.51192	6.809	6.95569	7.02478	6.62795	6.81961	6.99624	6.82266	7.22421	7.01261	7.08901
ENSG00000083838	7.27735	7.69369	7.26714	7.11674	7.08088	6.83205	6.80307	7.15448	7.30664	7.23645	7.34511	7.09449	7.27738	6.94434	7.19239	7.30709	7.11117	7.07775	6.82926	6.9948	6.78994
ENSG00000083844	8.75695	8.56258	8.89227	8.75653	8.78755	8.7887	9.07169	8.63085	8.79575	9.04508	8.92389	8.99628	9.12659	9.29111	8.52977	8.73138	8.91821	8.60219	8.88773	8.83253	8.8682
ENSG00000083845	12.7103	12.72	12.6987	12.7553	12.7022	12.6867	12.5797	12.8723	12.7934	12.3711	12.4885	12.5289	12.4368	12.3699	12.7114	12.7038	12.5769	12.8068	12.7296	12.8662	12.7825
ENSG00000083857	12.5576	12.4155	12.5032	12.4544	12.3712	12.4514	12.4651	12.3315	12.5473	12.7434	12.6315	12.7563	12.7931	12.8935	12.6344	12.8462	12.9865	12.825	13.0551	13.0227	13.0854
ENSG00000083896	10.686	10.7716	10.712	10.6709	10.792	10.6987	10.621	10.6824	10.5629	10.7633	10.7858	10.7485	10.7948	10.7963	10.6411	10.7145	10.6567	10.6259	10.868	10.9749	10.9719
ENSG00000083937	9.88311	9.86112	9.86787	9.91085	9.85566	9.99732	9.93889	9.96055	9.90643	9.90901	9.92424	10.0551	9.96923	9.90719	10.0808	10.1447	10.0824	10.1265	10.6173	10.6399	10.5457
ENSG00000084070	10.0693	10.3304	10.2578	10.0637	10.2956	10.1533	10.108	10.2636	10.1625	10.1535	10.1435	10.0339	9.96551	9.85616	9.98672	9.74013	9.71134	9.66159	9.28372	9.37422	9.35787
ENSG00000084072	9.61732	9.66037	9.73091	9.55531	9.71472	9.65482	9.52413	9.71751	9.73967	9.55105	9.67865	9.57296	9.59498	9.47912	9.65226	9.58815	9.50786	9.60946	9.48472	9.45914	9.49302
ENSG00000084073	10.3563	10.3665	10.5961	10.7049	10.4527	10.4534	10.7249	10.6038	10.6725	10.5111	10.5657	10.6522	10.5868	10.4406	10.4767	10.5781	10.6391	10.5879	10.6497	10.6729	10.6361
ENSG00000084090	11.547	11.5858	11.7548	11.7726	11.65	11.6786	11.8492	11.6703	11.7699	11.5479	11.6581	11.7317	11.5904	11.645	11.6072	11.5375	11.5217	11.5626	11.5962	11.4831	11.5305
ENSG00000084092	9.28547	9.31684	9.35122	9.27574	9.27714	9.44609	9.12298	9.33973	9.16986	9.12523	9.27432	9.38625	9.43729	9.25343	9.45548	9.45858	9.40383	9.34011	9.26095	9.35626	9.19116
ENSG00000084093	10.0744	10.1333	10.3391	10.1396	10.0778	10.0486	10.2037	9.98583	10.0658	10.2354	10.1498	10.313	10.2137	10.224	10.0319	10.0241	10.1535	10.0003	10.098	10.1337	10.1057
ENSG00000084110	4.10968	2.9115	3.45366	3.99528	3.05093	4.19585	3.32032	4.29249	3.72046	3.54245	3.74033	3.36785	4.18752	3.55648	4.17787	3.53337	3.31987	2.92024	3.91583	4.5844	5.05399
ENSG00000084112	10.7281	10.7608	10.7942	10.5743	10.5305	10.7246	10.6161	10.6343	10.6244	10.9002	10.7939	10.8828	10.909	10.9408	10.739	10.9507	11.0526	10.9615	11.8117	11.8108	11.7814
ENSG00000084207	13.2063	13.1656	13.1849	13.332	13.2591	13.1598	13.2281	13.4452	13.385	13.0179	13.1919	13.0471	13.2377	13.1622	13.4378	13.4787	13.3429	13.5484	13.2741	13.3247	13.2801
ENSG00000084234	13.8312	13.871	13.8256	13.693	13.8728	13.855	13.6415	13.8033	13.6639	13.854	13.8958	13.8157	13.7792	13.7919	13.7674	13.7311	13.6245	13.6938	13.7557	13.8077	13.7471
ENSG00000084444	6.71202	6.83943	7.1204	7.18483	6.89256	6.83541	7.22945	7.01362	6.63911	6.89548	6.88829	6.95139	6.69298	6.84692	6.708	6.73856	6.56898	6.8056	6.68517	6.86758	6.1819
ENSG00000084453	3.28651	4.05811	3.08186	3.3174	4.51491	4.78488	3.32032	3.29405	4.73235	3.1681	3.74033	3.90547	3.60804	3.79894	4.01787	3.91692	3.31987	2.56737	2.90777	2.75439	1.88167
ENSG00000084463	10.5827	10.5484	10.5609	10.5409	10.5999	10.6162	10.4179	10.6485	10.5217	10.6419	10.6778	10.6347	10.673	10.4428	10.5833	10.5706	10.519	10.5755	10.5972	10.5447	10.5782
ENSG00000084623	11.5073	11.4067	11.4985	11.562	11.4621	11.4735	11.4319	11.58	11.6026	11.3219	11.3962	11.3771	11.2985	11.2968	11.4877	11.5341	11.4897	11.592	11.659	11.7083	11.7242
ENSG00000084628	4.30495	4.05811	4.20345	4.08273	4.26444	4.72313	4.35585	4.72504	4.85886	4.64189	4.99599	4.85651	5.97716	5.96262	6.17488	6.98936	6.60574	6.86779	7.32519	7.33927	7.26721
ENSG00000084636	4.30495	4.89267	4.29776	4.51875	5.02587	4.52022	4.45773	4.29249	4.91819	4.35951	5.05084	4.23802	4.92007	5.71902	5.6553	6.12433	5.94134	5.74302	6.20231	6.16217	6.48551
ENSG00000084652	11.4955	11.7258	11.4766	11.4128	11.5348	11.5202	11.3794	11.4563	11.3439	11.5372	11.5277	11.4795	11.4768	11.5094	11.4441	11.4746	11.3865	11.3822	11.6048	11.5717	11.5764
ENSG00000084674	17.5685	17.8257	17.9133	17.8458	17.8451	17.9765	17.8326	17.6686	17.7546	17.8363	17.8186	17.8632	17.6361	17.7433	17.4999	17.3094	17.4144	17.2883	16.9049	16.7502	16.9073
ENSG00000084676	9.81661	10.0073	9.93361	9.81675	9.91313	9.92031	9.8315	9.79558	9.72313	10.0702	9.88893	10.0178	10.0023	10.0102	9.91755	9.96165	9.95403	9.89725	10.0633	10.0602	9.95906
ENSG00000084693	9.00896	8.85862	8.86172	8.90187	8.87225	8.66689	8.8624	8.81768	8.8765	8.59993	8.85236	8.66184	8.71241	8.60198	8.65745	8.44064	8.28649	8.70513	8.06441	8.01124	8.09319
ENSG00000084710	4.63054	4.26808	5.21299	4.45463	4.91408	5.15594	4.24623	5.17929	5.13375	5.2916	5.34221	5.19928	5.95731	5.68923	4.78655	5.65438	6.0697	5.8289	6.2234	6.25816	6.01224
ENSG00000084731	8.22884	8.01149	8.17234	7.94335	8.14973	7.64152	7.9422	8.13401	8.10374	8.35208	8.45498	8.28439	8.59524	8.65688	8.426	9.08285	9.02613	8.99942	9.86456	9.91065	9.87079
ENSG00000084733	11.337	11.2478	11.4075	11.4732	11.3041	11.3716	11.5331	11.5441	11.4812	11.4154	11.3909	11.5175	11.5766	11.5846	11.5296	11.9497	11.9701	11.8933	12.4959	12.4884	12.3428
ENSG00000084734	8.7189	8.8907	8.79457	8.79911	8.95931	8.94565	8.97836	8.89684	8.81149	8.97809	8.84462	8.87499	9.09058	9.43043	9.32694	9.55979	9.4718	9.27849	9.94133	10.0952	10.0299
ENSG00000084754	12.2095	12.3492	12.333	12.2432	12.3817	12.3845	12.0923	12.3052	12.1535	12.2655	12.2171	12.2322	12.1946	12.2485	12.2541	12.2714	12.1043	12.203	12.2662	12.238	12.1975
ENSG00000084764	7.8214	8.07569	7.7734	7.6532	7.84897	7.73834	7.8655	7.9464	7.86078	8.11401	8.01224	8.06756	8.11131	8.14494	8.13078	8.3732	8.33108	8.34598	8.33044	8.39587	8.41784
ENSG00000084774	10.3741	10.4986	10.4015	10.3798	10.3743	10.3085	10.3689	10.2682	10.3384	10.4855	10.5634	10.4531	10.5433	10.7348	10.4987	10.6762	10.7664	10.5568	10.6891	10.6576	10.7196
ENSG00000085063	12.4069	12.3182	12.4519	12.4995	12.3611	12.3957	12.4866	12.4359	12.5186	12.3483	12.289	12.4663	12.2697	12.1702	12.3849	12.3844	12.4188	12.4983	12.7369	12.7804	12.7327
ENSG00000085117	8.01525	7.98201	8.20313	7.97227	8.08021	7.94181	7.67241	7.84564	7.59597	7.67431	7.95588	7.91801	7.24491	7.82702	7.86877	7.33485	7.09385	7.3756	6.82967	7.14371	6.79553
ENSG00000085185	9.80455	9.97585	9.88316	9.7075	9.82508	9.89252	9.67637	9.75203	9.85232	10.1388	10.0338	9.85784	10.104	10.3121	9.97451	10.1209	10.1821	9.93284	10.1905	10.2384	10.0892
ENSG00000085224	10.8514	10.7378	10.8002	10.6352	10.7861	10.9066	10.5492	10.6326	10.5757	10.9918	10.8568	10.9681	10.8497	10.8266	10.6142	10.6738	10.6077	10.6556	10.9334	10.8302	10.9815
ENSG00000085231	8.61515	8.64347	8.86037	8.84641	8.70043	8.69084	8.96488	8.82072	8.90797	8.55369	8.6547	8.76786	8.84483	8.82822	8.99578	9.35877	9.18046	9.32314	9.51749	9.56652	9.52805
ENSG00000085274	8.88463	8.70471	8.97309	8.89282	8.81893	8.89053	8.94146	9.00523	8.97757	8.84797	8.70627	8.99848	8.93431	8.79616	8.93453	8.8436	8.83807	8.90866	8.93003	8.92804	8.82044
ENSG00000085276	5.56345	4.36262	5.05993	4.90202	5.12962	5.20194	5.29288	4.82805	5.23055	5.63864	5.20387	5.34429	5.14737	5.46146	5.35398	5.62891	5.80042	5.24621	5.94742	6.21096	6.10895
ENSG00000085365	9.53699	9.31684	9.69019	9.73644	9.46737	9.54087	9.82198	9.66947	9.67664	9.62102	9.62995	9.78093	9.83013	9.77871	9.81173	9.8613	9.97292	9.87472	10.1985	10.1157	10.129
ENSG00000085377	10.0877	9.97772	9.96448	10.1294	9.97363	10.095	10.0754	10.0841	9.99176	9.89294	10.1181	10.0134	10.1017	10.075	10.0796	10.1289	10.0371	10.1796	9.86623	9.8808	9.85694
ENSG00000085382	7.41908	7.64843	7.7402	7.61704	7.54559	7.59917	7.74474	7.66263	7.70947	7.64262	8.00532	7.5203	7.61806	7.56526	7.4962	7.63274	7.61645	7.2644	7.41957	7.51793	7.67991
ENSG00000085415	9.58478	9.36331	9.50492	9.61152	9.57697	9.58276	9.8148	9.70374	9.73555	9.69241	9.65451	9.733	9.78579	9.87282	9.71557	10.1357	10.1555	10.0414	10.513	10.5248	10.4929
ENSG00000085433	7.42958	7.54135	7.52312	7.43794	7.45861	7.5014	7.75478	7.56907	7.91276	7.46557	7.75584	7.79722	7.51317	7.60569	7.47325	7.61986	7.69817	7.61801	7.87753	7.931	7.79484
ENSG00000085449	10.4918	10.5019	10.6008	10.5995	10.4641	10.5783	10.6824	10.4833	10.6855	10.5509	10.587	10.7097	10.6489	10.625	10.5641	10.611	10.688	10.5735	10.521	10.524	10.5127
ENSG00000085465	9.59882	9.57308	9.6483	9.6514	9.61098	9.69558	9.48304	9.62367	9.59264	9.513	9.49802	9.43888	9.37878	9.23035	9.42789	9.19776	9.11383	9.15715	8.60804	8.51399	8.74721
ENSG00000085491	9.56347	9.38035	9.6727	9.6316	9.55849	9.47916	9.74094	9.666	9.61746	9.68153	9.70667	9.83715	9.85583	9.8695	9.81325	10.1867	10.2659	10.1008	10.6507	10.7179	10.5379
ENSG00000085511	9.97744	10.1165	10.0398	9.88675	10.1659	10.0965	9.87818	10.0093	9.83511	10.1101	10.0321	10.0853	10.0488	10.1133	9.97587	9.83509	9.60034	9.7916	9.44499	9.37244	9.46771
ENSG00000085514	4.56571	4.69173	3.30172	4.25375	4.07366	5.06329	3.53411	3.97993	4.27665	4.49686	3.88016	3.91069	4.13616	4.19123	4.60135	4.36803	4.76714	3.33615	4.43932	3.44004	3.9424
ENSG00000085552	3.88379	2.9115	3.60888	2.3179	4.17025	3.35625	3.7797	3.43127	4.35689	3.30397	3.60027	3.82866	3.96696	2.67417	3.51723	3.63923	4.24577	3.73533	3.27393	3.82146	4.01926
ENSG00000085563	5.56345	5.18894	5.36013	5.04605	5.3604	5.56083	4.989	5.64203	5.60919	6.05928	5.62122	5.85347	6.00122	5.62774	5.28746	6.7064	6.77671	6.28899	8.73206	9.16375	8.78952
ENSG00000085644	7.44001	7.68548	7.35783	7.32591	7.38713	7.30463	7.31337	7.65565	7.40179	7.23849	7.42316	7.51418	7.43636	7.39115	7.46552	7.18559	7.25683	7.32477	7.40118	7.34657	7.34869
ENSG00000085662	10.8337	10.4973	10.4186	10.4888	10.353	10.3927	10.5506	10.6952	10.5501	10.5526	10.561	10.757	10.3494	10.1871	10.5306	10.42	10.3157	10.7209	10.8332	10.8418	11.0231
ENSG00000085719	11.46	11.5039	11.6812	11.7122	11.4947	11.5954	11.7973	11.5731	11.6834	11.5049	11.4804	11.5675	11.4366	11.5337	11.4772	11.5764	11.6891	11.5277	11.6483	11.5768	11.5361
ENSG00000085721	10.1279	10.0496	10.2778	10.2726	10.0547	10.0816	10.3095	10.1643	10.1873	10.2852	10.2697	10.3342	10.4397	10.3526	10.3057	10.5823	10.6625	10.5132	11.1164	11.1028	10.9616
ENSG00000085733	12.2382	12.2448	12.197	12.0854	12.2451	12.1917	12.1431	12.208	12.193	12.3368	12.2938	12.2782	12.5727	12.6648	12.548	12.8914	12.842	12.7438	13.3917	13.4694	13.3432
ENSG00000085741	1.80823	2.9115	1.1664	1.58161	3.05093	2.15875	3.20786	1.97681	1.78087	1.87298	2.57187	2.99866	3.38839	2.89903	1.53602	3.63923	4.04622	3.73533	5.63762	5.90975	5.65034
ENSG00000085760	9.82657	9.98888	9.98589	9.86534	10.0166	10.1026	9.72571	9.98165	9.72105	9.88348	9.97298	9.92856	9.92902	9.87282	9.85084	9.91103	9.71415	9.83894	9.64772	9.6138	9.67935
ENSG00000085788	9.67365	9.74965	9.77461	9.91681	9.79581	9.86419	9.97692	9.83321	9.82739	9.98427	9.89268	9.89245	9.93284	9.97974	9.74781	9.90042	9.97877	9.8785	10.053	10.0185	9.92227
ENSG00000085831	7.93639	8.08958	8.01466	8.05568	7.84897	8.00804	7.84214	8.02439	8.12278	8.16844	8.06648	8.03801	8.44651	8.43252	8.42201	9.01564	8.98718	8.81444	9.52572	9.63779	9.40434
ENSG00000085832	10.3186	10.2646	10.4199	10.4908	10.4577	10.3294	10.4993	10.3484	10.5121	10.5181	10.4958	10.546	10.5088	10.5555	10.4603	10.6985	10.7321	10.5513	10.8763	10.944	10.7723
ENSG00000085840	5.96121	5.46135	5.63041	5.74995	5.52166	5.33175	5.61296	5.2917	5.63594	5.76175	5.94453	5.50101	5.37396	5.42577	5.78524	5.3768	5.10821	5.67508	4.86723	5.14918	5.20164
ENSG00000085871	10.6639	10.7245	10.6915	10.9893	10.8194	10.9544	10.9927	10.9907	11.0814	10.463	10.6481	10.7485	10.67	10.5596	10.7902	10.6183	10.5093	10.776	9.81506	9.78872	9.93684
ENSG00000085872	10.6198	10.6816	10.5926	10.3404	10.5886	10.5544	10.3199	10.5464	10.4431	10.7275	10.7354	10.5939	10.8382	10.7797	10.7993	10.9234	10.8656	10.7556	10.954	11.0115	10.9544
ENSG00000085978	10.0093	10.0891	10.0618	9.98081	10.0875	10.0797	10.11	10.0723	10.0592	10.1331	10.0691	10.116	10.257	10.2535	10.1881	10.3496	10.3359	10.3252	10.3584	10.3296	10.2569
ENSG00000085982	10.5553	10.8358	10.8729	10.7722	10.8406	10.8427	10.8295	10.7796	10.8276	10.9425	10.8891	10.8135	11.0215	11.0393	10.8685	10.907	10.86	10.7827	10.7274	10.7242	10.6618
ENSG00000085998	10.5299	10.5881	10.4625	10.5107	10.361	10.3803	10.5245	10.4837	10.5	10.4548	10.5833	10.4603	10.6345	10.5586	10.6708	10.659	10.6899	10.6774	10.7321	10.8851	10.7833
ENSG00000085999	5.40208	4.76001	5.05993	4.58014	4.97106	4.00146	4.88092	4.87693	4.17427	5.44646	5.20387	4.69279	5.07551	4.74616	4.78655	4.63236	4.5773	5.11561	3.91583	4.53416	4.17033
ENSG00000086015	10.4288	10.4456	10.3881	10.0877	10.4414	10.2672	10.2917	10.3364	10.243	10.6618	10.6369	10.3985	11.0052	11.1418	10.9663	11.4674	11.3674	11.2326	11.813	11.8578	11.6606
ENSG00000086061	12.2663	12.0924	12.2118	12.1574	12.2288	12.2445	12.1642	12.3402	12.0992	12.2692	12.2439	12.3159	12.4172	12.4345	12.4253	12.8102	12.6834	12.7374	13.2834	13.3212	13.262
ENSG00000086062	12.6337	12.7133	12.8054	12.7945	12.7226	12.7372	12.8191	12.7446	12.8846	12.6872	12.7602	12.7668	12.6429	12.628	12.6262	12.5682	12.6279	12.5131	12.621	12.5977	12.577
ENSG00000086065	10.0005	9.66638	9.8621	10.0503	9.75177	9.89252	9.85736	9.92758	9.92282	9.75599	9.75702	10.0275	9.7984	9.61406	9.8538	9.92418	9.94808	10.047	10.1662	10.2365	10.0928
ENSG00000086102	10.1124	10.1908	10.1274	9.99356	10.283	10.1865	10.0192	9.89235	9.9426	10.2597	10.1372	10.1529	10.2871	10.233	10.258	10.298	10.3148	10.3104	10.4707	10.4798	10.4821
ENSG00000086189	8.7317	8.43241	8.60007	8.7229	8.69334	8.53833	8.71589	8.8578	8.71022	8.67391	8.66731	8.84606	8.99643	8.78915	8.92328	9.31422	9.34161	9.37443	9.48919	9.58786	9.54925
ENSG00000086200	8.94813	8.8907	9.14968	9.06644	9.03809	9.13835	9.0817	9.17425	9.22376	9.17038	9.19132	9.23382	9.1447	9.1258	8.96775	9.01072	9.03064	9.05617	9.18665	9.02058	8.95401
ENSG00000086232	12.048	12.0641	12.1313	12.0854	12.0415	12.1368	12.1302	12.1824	12.17	12.0114	12.1175	12.1286	12.0609	12.1134	12.1108	12.0726	12.0713	12.0045	11.8579	11.7928	11.8638
ENSG00000086289	9.30843	9.11436	9.12873	9.27574	9.0743	9.17629	9.37813	9.41198	9.46914	9.35965	9.47314	9.3896	9.797	9.65894	9.70739	9.80839	9.84549	9.86077	9.1275	9.0515	9.37547
ENSG00000086300	8.1611	8.54757	8.4694	8.44206	8.25098	8.32105	8.46989	8.40371	8.5739	8.37155	8.53891	8.51942	8.35841	8.46365	8.31849	8.48745	8.58848	8.56514	8.67462	8.62317	8.35218
ENSG00000086475	10.5275	10.5282	10.3908	10.4191	10.5042	10.5105	10.4084	10.5577	10.4086	10.6062	10.457	10.4603	10.4891	10.3871	10.4996	10.4728	10.4244	10.5418	10.2661	10.2335	10.2841
ENSG00000086504	10.6416	10.6862	10.5786	10.7169	10.8185	10.551	10.5643	10.8223	10.7181	10.4234	10.6447	10.4794	10.5215	10.4384	10.7833	10.6924	10.4799	10.668	10.4619	10.4996	10.4884
ENSG00000086544	9.80657	9.9089	9.73091	9.65318	9.86132	9.80208	9.48304	9.79875	9.70429	9.97284	9.96229	9.79361	9.8955	10.1203	10.0808	10.3428	10.1648	10.2049	10.7924	10.8591	10.6753
ENSG00000086548	3.46055	2.29702	2.85251	3.16545	2.21529	1.72691	3.08589	2.97291	1.78087	2.18603	2.84444	2.28829	2.40741	3.26489	4.01787	3.0094	2.74808	2.75457	4.35852	4.25279	4.24032
ENSG00000086589	9.85415	9.75401	9.76845	9.91978	9.76593	9.85523	9.90886	9.99693	9.9046	9.80977	9.90762	9.94229	10.0275	9.8695	9.947	10.0301	10.0693	9.9817	10.2197	10.2752	10.1022
ENSG00000086598	13.1499	13.1725	13.277	13.3758	13.2997	13.2956	13.3915	13.3327	13.3167	13.1027	13.1835	13.2943	13.1457	13.0851	13.1459	13.0837	13.1291	13.1902	13.0141	12.9977	13.0235
ENSG00000086619	8.36098	8.48064	8.55305	8.69542	8.57426	8.6832	8.92377	8.61653	8.65025	8.4432	8.64074	8.6254	8.16855	8.19349	8.08609	7.98869	8.09288	7.7777	8.08183	8.14699	8.02046
ENSG00000086666	10.5505	10.4536	10.5868	10.5846	10.665	10.6724	10.6278	10.6815	10.7903	10.5755	10.3894	10.6033	10.5367	10.465	10.5333	10.5922	10.5222	10.6467	10.7711	10.7165	10.7356
ENSG00000086696	9.55149	9.4627	9.4262	9.56673	9.54448	9.45562	9.52765	9.66426	9.8618	9.60137	9.60955	9.75522	9.70921	9.4616	9.8538	9.34974	9.37395	9.54273	8.62001	8.69353	8.90098
ENSG00000086712	9.97564	9.91476	10.1717	10.0838	10.1257	10.1192	10.1666	10.0578	9.97962	10.2376	10.0724	10.2089	10.3341	10.4032	10.1294	10.4576	10.4699	10.2991	10.8384	10.8019	10.7752
ENSG00000086717	3.08855	3.67166	2.57968	3.58035	1.77785	3.18359	3.32032	1.97681	3.25204	3.30397	3.2713	3.1325	3.96696	2.67417	2.52352	2.43501	2.91363	2.75457	2.08824	1.79214	2.19535
ENSG00000086730	6.01802	5.62287	5.35136	5.08258	5.40244	5.0593	5.23666	5.2917	5.13375	5.04241	4.93898	4.81729	4.83559	5.00988	4.88259	5.07111	4.92638	4.85406	4.81262	3.90291	3.55337
ENSG00000086758	12.4662	12.6002	12.5341	12.3768	12.4671	12.5737	12.4012	12.2881	12.3638	12.688	12.6399	12.5665	12.5998	12.7082	12.5242	12.5501	12.528	12.5068	12.6756	12.6457	12.6972
ENSG00000086827	8.5796	8.56755	8.8462	8.84985	8.64162	8.6504	8.86472	8.85476	8.88767	8.92902	8.79327	8.91502	8.67643	8.79266	8.71076	8.59989	8.56378	8.66483	9.03214	8.94015	8.72297
ENSG00000086848	9.69123	9.50009	9.73203	9.82311	9.60873	9.56406	9.82675	9.62188	9.7822	9.6388	9.61411	9.63631	9.64357	9.62197	9.47389	9.63369	9.80917	9.62155	9.64409	9.54423	9.41414
ENSG00000086991	5.96121	5.32712	5.3067	5.16503	5.70078	5.45083	5.34698	5.96948	5.13375	5.1181	6.05597	5.87023	5.83207	5.65881	5.92714	5.54967	4.96462	5.4223	5.57338	5.90975	5.9006
ENSG00000087008	9.35327	9.49175	9.35396	9.50277	9.53978	9.422	9.54221	9.53509	9.56274	9.43928	9.4427	9.36431	9.46919	9.47257	9.53891	9.29612	9.36861	9.24569	9.24558	9.12335	9.05214
ENSG00000087053	8.95906	9.02685	9.1223	9.1699	9.06124	9.15599	9.27026	9.28193	9.26148	9.3121	9.26855	9.40952	9.31585	9.1857	9.29457	9.55979	9.53034	9.42011	10.053	10.0116	10.0312
ENSG00000087074	10.1652	9.68021	9.69019	9.54764	9.61768	9.48847	9.52471	9.88042	9.62193	10.1478	10.1052	10.021	10.2911	10.3637	10.4671	11.1139	10.9856	10.9627	12.4105	12.6381	12.2371
ENSG00000087076	9.01246	9.04834	8.73682	9.02564	9.18079	8.8259	9.02888	9.02433	8.89507	8.76209	8.94576	8.73206	8.68249	8.74277	8.9429	8.88723	8.80683	8.70797	8.91714	8.86338	8.87646
ENSG00000087077	10.2829	10.0611	9.90017	10.0187	10.045	10.02	9.87243	10.2602	10.2416	10.0926	10.1685	10.0667	10.2832	10.317	10.4397	10.4097	10.3532	10.5258	10.2598	10.3139	10.3219
ENSG00000087085	8.14843	8.03321	7.8376	7.63162	7.9158	7.64152	7.92452	7.87601	8.07796	8.19926	8.10587	8.00784	8.54291	8.6911	8.58077	9.3202	9.27849	8.72767	9.95558	10.1231	9.85694
ENSG00000087086	17.8184	17.922	17.9681	18.1037	17.9905	17.9675	18.1318	18.1796	18.0718	17.7848	18.0343	17.9672	18.2294	18.3067	18.3937	18.5454	18.4308	18.5651	18.448	18.4906	18.4552
ENSG00000087087	11.0156	11.0797	10.9013	10.8822	10.9799	10.9435	10.8437	10.9948	10.8723	11.0333	11.1578	10.9301	11.0966	11.1718	11.1158	11.1652	11.0708	11.0226	11.2032	11.2011	11.1815
ENSG00000087088	11.4072	11.2845	11.134	11.2352	11.2192	11.149	11.1235	11.3821	11.2986	11.2129	11.2009	11.1892	11.26	11.2324	11.4183	11.4737	11.4144	11.4829	11.5506	11.6714	11.5853
ENSG00000087095	9.27968	8.97167	9.30655	9.27574	9.03141	9.30041	9.39589	8.95205	9.19706	9.20768	9.18826	9.29463	9.11095	8.99189	9.15489	8.97325	9.22041	9.1129	9.09069	9.28589	9.13256
ENSG00000087111	9.66256	9.82629	9.86787	9.6514	9.69371	9.64652	9.73081	9.7924	9.79611	9.65953	9.683	9.61359	9.45686	9.38004	9.65566	9.26958	9.29547	9.32171	9.0529	9.11697	9.1823
ENSG00000087152	10.8976	10.8213	10.6729	10.5781	10.696	10.7196	10.6326	10.7088	10.7582	10.8295	10.8138	10.7459	10.8537	10.8257	10.9133	10.9825	11.011	10.949	11.2826	11.2471	11.076
ENSG00000087157	9.33662	9.23173	9.07648	9.29418	9.12853	9.1145	9.26148	9.14647	9.24709	9.30199	9.22151	9.10206	9.1811	9.15878	9.1282	9.11761	9.18844	9.20411	9.28622	9.21191	9.057
ENSG00000087191	10.8747	10.9648	10.8429	10.9353	10.9755	10.8535	10.7357	11.0086	10.8872	10.8982	10.7767	10.7647	10.763	10.8042	11.0028	10.9774	10.8814	10.952	10.9477	10.9749	11.0043
ENSG00000087206	8.57013	8.70019	8.41784	8.62797	8.6284	8.73496	8.5813	8.77963	8.71022	8.59	8.49508	8.60827	8.82352	8.88753	8.85979	8.83249	8.85344	8.90372	9.09355	9.13604	9.09291
ENSG00000087245	3.28651	3.14222	3.27971	3.90219	3.57667	3.35625	2.64235	2.97291	4.26847	2.85068	2.23553	3.47254	3.12918	3.90642	3.51723	4.07619	3.72828	3.44023	4.10948	3.73514	2.86097
ENSG00000087253	4.47691	5.32712	5.21299	4.90202	4.66058	4.28403	4.7262	4.14066	4.66467	5.08075	5.34221	4.55653	4.65014	4.68709	4.32188	4.58014	4.71828	4.972	4.43282	4.53416	5.12231
ENSG00000087258	3.88379	4.53491	3.08186	3.45486	3.96115	2.98742	3.61307	3.1424	2.21862	3.42813	3.86799	1.7359	2.62439	3.26489	2.74412	3.0094	2.34609	2.35221	2.41586	2.09909	3.55337
ENSG00000087263	10.2477	10.0873	10.2519	10.2238	10.3219	10.4379	10.3771	10.4099	10.2617	10.3468	10.4821	10.498	10.5258	10.5688	10.5185	10.6392	10.7203	10.5963	10.5738	10.6287	10.7011
ENSG00000087266	11.5804	11.8771	11.7291	11.5874	11.6818	11.7673	11.6331	11.5091	11.5787	11.7365	11.7213	11.5745	11.7482	11.8029	11.601	11.6101	11.6238	11.4125	11.469	11.4462	11.3719
ENSG00000087269	9.79239	9.9646	9.7705	9.65318	9.83854	9.89428	9.68821	9.76993	9.66803	9.901	9.98359	9.95815	10.155	10.2057	10.15	10.3141	10.2745	10.2963	10.6033	10.5984	10.6498
ENSG00000087274	12.4902	12.6579	12.6006	12.5246	12.6214	12.6452	12.4882	12.5514	12.476	12.617	12.5808	12.5739	12.5723	12.5907	12.5687	12.525	12.5216	12.4958	12.3712	12.3338	12.3591
ENSG00000087299	8.43063	8.73153	8.72838	8.85606	8.69756	8.6504	8.74137	8.59112	8.70602	8.53927	8.50002	8.83137	8.54956	8.56144	8.414	8.08551	8.44029	8.35324	7.90389	7.83569	7.85743
ENSG00000087301	9.16802	9.35183	9.41835	9.45235	9.4067	9.55423	9.32014	9.32219	9.27004	9.10677	9.25109	9.23076	8.90092	8.82726	8.7463	8.47678	8.55754	8.42739	7.94889	7.78825	7.78317
ENSG00000087302	11.056	10.9179	11.0348	11.1755	11.0973	11.0096	11.0237	11.1656	11.1726	10.8011	10.9336	11.0073	10.9466	10.8671	10.9927	11.0785	10.9978	11.1641	10.9588	11.0771	11.1127
ENSG00000087303	5.06728	4.82787	4.94805	4.85312	5.27247	5.20194	4.76646	4.72504	4.97518	5.04241	4.81772	4.93189	4.87845	4.96085	4.88259	4.21961	4.18227	3.82165	5.28331	4.25279	5.42845
ENSG00000087338	8.97708	8.99768	9.04623	9.1294	8.98375	9.01171	9.13072	8.93772	9.17595	9.11603	8.93486	9.2289	8.85337	8.68357	8.67432	8.519	8.65723	8.73325	8.43356	8.45445	8.43286
ENSG00000087365	12.1591	12.23	12.0936	11.943	12.2019	12.1088	11.8504	12.0762	11.9601	12.133	12.1661	12.0972	12.1768	12.1562	12.1998	12.2291	12.073	12.1663	12.2086	12.2108	12.1937
ENSG00000087448	9.43116	9.34026	9.57486	9.46054	9.29119	9.3826	9.60045	9.389	9.31212	9.62102	9.48315	9.60786	9.5837	9.67423	9.60023	9.62244	9.77326	9.59268	10.0188	9.99549	9.95125
ENSG00000087460	14.6343	14.69	14.575	14.4876	14.6629	14.6225	14.3345	14.6719	14.5331	14.4869	14.5186	14.5123	14.4612	14.384	14.5961	14.6138	14.5053	14.5859	14.6744	14.6871	14.6218
ENSG00000087470	10.7824	10.6953	10.6817	10.7331	10.7469	10.8013	10.7101	10.8137	10.695	10.8962	10.8461	10.9226	10.8597	10.8461	10.8109	10.9254	10.9068	10.9573	11.3632	11.2808	11.3117
ENSG00000087494	3.46055	1.85184	3.27971	2.3179	3.24824	2.76032	3.20786	3.43127	2.21862	3.54245	4.09372	2.99866	2.62439	2.40767	2.93542	3.0094	3.53848	3.64351	5.39902	6.077	5.70086
ENSG00000087502	9.80858	9.70524	10.0278	9.92719	9.79186	9.77381	9.89076	9.93337	9.88243	9.87123	9.90762	9.95025	9.84507	9.82053	9.77152	9.79842	9.81441	9.917	9.89115	9.86183	9.97326
ENSG00000087586	7.67833	7.64815	7.60794	7.89585	7.65352	7.82908	7.83742	7.80183	7.71784	7.91085	7.82039	7.88519	7.90864	7.67572	7.74007	7.65814	7.83865	7.95504	7.42867	7.78256	7.51322
ENSG00000087589	4.63054	4.82787	4.20345	4.16517	4.58958	3.89347	4.7262	4.42985	3.72046	4.74099	4.46072	4.85651	4.04428	3.6828	3.93069	3.29504	2.74808	2.75457	2.08824	3.44004	2.6713
ENSG00000087842	9.51742	9.54564	9.59821	9.83418	9.77596	9.79272	9.95858	10.1047	9.97439	9.82538	9.99936	9.94798	10.5325	10.4965	10.6565	10.7948	10.6435	10.7821	10.5205	10.3882	10.5301
ENSG00000087884	7.63422	7.62954	8.02848	8.01735	7.81824	7.94857	7.87474	7.75704	7.77513	7.65538	7.76407	7.82715	7.73929	7.38187	7.88045	7.84121	7.56759	7.90179	7.56707	7.71121	7.93334
ENSG00000087903	5.01242	4.53491	3.87673	3.90219	4.43615	4.00146	4.24623	4.0583	3.72046	4.35951	4.37734	4.17736	4.25413	4.00644	3.8379	4.14968	4.8467	4.3722	4.97061	5.14918	4.75249
ENSG00000087995	8.91677	8.75921	8.60243	8.8461	8.63807	8.78878	8.74963	8.76543	8.52746	8.73259	8.83477	8.85296	8.98919	8.95719	9.00653	9.07589	8.93283	8.92667	9.19441	9.11594	9.04705
ENSG00000088035	8.72318	8.62112	8.76185	8.99498	8.7716	8.96912	9.1191	8.91157	9.01202	8.82838	8.64074	8.89632	8.73007	8.75001	8.71402	8.66714	8.77759	8.68512	8.34974	8.40638	8.4661
ENSG00000088038	10.2712	10.326	10.2356	10.1243	10.2632	10.1474	10.0161	10.1954	10.111	10.3409	10.2352	10.2333	10.1485	10.1521	10.2114	10.1243	10.1168	10.0954	10.1415	10.1712	10.1654
ENSG00000088053	4.89601	4.45134	4.82677	3.80268	4.35285	4.59107	4.55288	4.3628	4.26847	4.87794	3.60027	4.40605	4.65014	4.4232	4.57284	5.3768	4.95933	4.76971	4.69679	4.62769	4.43196
ENSG00000088179	8.61225	8.53239	8.8462	8.96364	8.67201	8.73496	9.02474	8.61293	8.94228	8.88636	8.84073	8.88451	9.01816	8.91675	8.71728	8.73437	8.83807	8.66775	8.49986	8.56805	8.48785
ENSG00000088205	10.1462	10.0452	10.2086	10.3393	10.2227	10.2385	10.3131	10.2636	10.224	10.32	10.2717	10.2872	10.3805	10.3917	10.4613	10.5672	10.5444	10.5732	10.763	10.7374	10.7089
ENSG00000088247	11.7624	11.7511	11.6648	11.6175	11.7586	11.7068	11.6396	11.7959	11.6389	11.8878	11.8602	11.7582	11.9845	12.0562	12.0187	12.1139	12.0694	12.0784	12.249	12.2527	12.1942
ENSG00000088256	11.0347	11.0374	10.9292	10.8175	10.943	10.8661	10.7552	10.8121	10.8657	11.1674	11.0825	10.9991	11.0586	11.161	11.1232	11.0797	11.0409	11.0942	11.2598	11.3546	11.2668
ENSG00000088280	10.2698	10.4894	10.3097	10.1281	10.3544	10.3652	10.1188	10.3795	10.111	10.324	10.2746	10.1975	10.5516	10.6771	10.494	10.7198	10.6302	10.499	10.5666	10.5288	10.4118
ENSG00000088298	9.82857	9.88521	9.84267	9.72289	9.87632	9.7946	9.65643	9.92758	9.80399	9.70474	9.76114	9.68614	9.61096	9.4394	9.79331	9.74162	9.65252	9.56479	9.55096	9.5201	9.53887
ENSG00000088305	6.94959	6.54907	6.9566	6.47076	6.90724	7.00068	6.63123	6.6558	6.58521	7.04842	6.84239	6.67248	6.78597	6.95101	6.73398	6.66527	6.75505	6.67256	6.62306	6.49984	6.66164
ENSG00000088325	8.0767	7.85767	7.8376	7.85917	7.70524	7.49217	7.50403	7.99702	7.58685	8.25062	8.28811	8.41164	8.15989	8.05436	8.01369	7.84674	7.80215	8.04772	7.88416	8.06531	8.32425
ENSG00000088340	7.97994	8.5273	8.06246	8.37869	8.28509	8.47885	8.78367	7.89986	7.83792	8.18173	7.85162	8.14879	8.01855	8.17749	8.04516	8.08551	8.00386	7.55641	7.5916	7.33193	7.34869
ENSG00000088356	9.749	9.53299	9.4699	9.64423	9.68947	9.67941	9.49955	9.82234	9.7842	9.64201	9.7446	9.73431	9.74439	9.79103	9.83442	10.0674	9.91428	10.0615	10.1999	10.2047	10.3148
ENSG00000088367	8.22884	8.28932	8.07583	8.19955	8.19827	8.38725	8.34916	8.55028	8.32264	8.41721	8.59994	8.33039	8.54624	8.53656	8.34402	8.49805	8.40596	8.34598	9.18506	9.24157	8.86543
ENSG00000088386	9.69123	9.66174	9.7705	9.66563	9.73542	9.72935	9.72443	9.58558	9.71688	9.46488	9.52974	9.51746	9.44622	9.4616	9.32694	9.18907	9.12864	9.14045	8.58378	8.57428	8.38345
ENSG00000088387	7.929	7.95192	8.0077	7.93621	8.04747	8.00155	8.01084	8.01351	7.81469	8.00358	7.91212	8.09991	7.91941	8.19879	7.84513	8.29842	8.19293	7.98364	8.84074	8.79835	8.68582
ENSG00000088448	10.6794	10.6398	10.7045	10.8159	10.6345	10.5872	10.9126	10.6228	10.6465	10.738	10.6962	10.7915	10.7319	10.6969	10.6256	10.8189	10.8963	10.7901	11.0226	10.9895	11.0537
ENSG00000088451	8.23485	8.14383	8.34792	8.26645	8.45949	8.44577	8.26734	8.52367	8.4079	8.23795	8.19986	8.37834	8.1023	8.21456	8.11109	8.17183	8.29026	8.27508	8.18754	8.23611	8.13052
ENSG00000088538	4.55577	4.45134	3.74901	4.24316	4.26444	4.00146	4.50609	3.97095	4.35689	3.8394	4.19458	4.7355	4.79141	4.4232	4.01787	4.52597	3.43332	4.31382	4.97061	4.31362	4.49058
ENSG00000088543	7.3433	7.31181	7.14598	7.00623	7.07257	7.12527	6.96977	7.32674	7.07679	7.21282	7.17421	6.97831	7.00488	6.95101	7.20256	6.61425	6.86023	6.70699	6.15919	5.69788	6.25135
ENSG00000088682	10.4752	10.5089	10.3665	10.4626	10.5305	10.5264	10.3591	10.5577	10.4817	10.2659	10.3421	10.2935	10.2651	10.2624	10.3596	10.167	10.2231	10.3481	9.88288	9.82695	9.9694
ENSG00000088726	2.58599	2.9115	2.24292	1.99623	2.55049	2.76032	2.95264	0.98458	3.05467	1.87298	2.84444	3.97839	4.04428	3.79894	3.39227	3.41912	2.91363	3.54545	4.43282	4.76951	4.84524
ENSG00000088727	6.04561	5.23015	5.5937	5.66749	5.8601	5.41222	5.59071	5.85217	5.60016	5.76175	5.62122	5.68656	5.78779	5.59598	5.70869	6.06857	5.92203	5.87	6.13714	6.09444	5.72547
ENSG00000088756	4.47691	4.16691	4.29776	4.16517	3.96115	3.51044	4.40769	4.6141	4.79699	4.53547	4.19458	4.45797	3.79863	4.74616	3.8379	4.46968	4.8467	4.4283	4.57083	4.5844	4.01926
ENSG00000088766	10.8406	10.8785	10.9718	11.2087	11.0293	11.055	11.1832	11.165	11.1039	10.9189	10.8891	10.995	10.9728	10.9543	11.0713	10.9003	10.8957	10.9478	10.2521	10.1783	10.3636
ENSG00000088808	10.1254	10.2919	10.1064	9.94041	10.2005	10.1533	9.86549	9.9662	9.88243	10.2565	10.1229	9.95815	10.1605	10.1791	10.1183	10.2063	10.2043	10.0736	10.6033	10.5699	10.4575
ENSG00000088812	12.2627	12.4141	12.4302	12.4785	12.3455	12.4141	12.4611	12.2613	12.4258	12.4038	12.3604	12.3802	12.1994	12.2308	12.1363	11.9561	12.0713	11.9465	11.878	11.8255	11.7855
ENSG00000088826	9.52479	9.23485	9.25458	9.11132	8.99065	9.03731	9.16124	9.44477	9.36904	9.6388	9.68083	9.44694	9.86785	9.90395	10.0719	10.3719	10.3139	10.3372	11.1859	11.2645	11.1358
ENSG00000088832	11.663	11.6694	11.7063	11.7587	11.6744	11.5726	11.8524	11.8538	11.9014	11.5728	11.6055	11.7012	11.667	11.599	11.8252	11.8733	11.8501	11.9263	11.9618	12.0071	11.9708
ENSG00000088833	10.9641	11.0048	10.8834	10.8183	10.895	10.986	10.8343	11.0551	10.978	10.9405	11.0082	10.9058	10.9998	10.9959	11.1739	11.1435	11.0415	11.0855	11.1464	11.1436	11.1369
ENSG00000088836	5.87157	5.66057	5.95376	5.54966	5.3604	5.72735	5.89306	5.85217	6.00775	6.03994	5.65701	6.22517	5.7421	5.46146	5.76017	5.67941	6.1214	5.74302	6.11474	6.47342	6.67434
ENSG00000088854	9.21737	9.10755	9.00489	9.28959	8.99065	9.10545	9.29971	8.74714	9.11069	9.16593	9.21852	9.21576	9.19601	9.26358	9.00023	9.26339	9.3916	9.12568	9.74753	9.84003	9.55441
ENSG00000088876	7.69984	7.93663	7.89907	7.94113	7.86409	7.69702	7.6972	7.96912	7.76708	8.00851	7.84388	7.72489	8.14242	8.089	7.99769	8.12704	7.94998	7.87831	8.03489	7.97404	7.9491
ENSG00000088881	9.58478	9.51509	9.36762	9.41493	9.64858	9.36502	9.12879	9.46888	9.35837	9.45214	9.52491	9.3711	9.48314	9.45498	9.49401	9.57654	9.582	9.50409	10.1065	10.1442	9.91024
ENSG00000088882	7.6067	7.44741	7.17112	7.25239	7.19721	7.47354	7.26501	7.47696	7.06372	7.54314	7.47421	7.47061	7.35523	7.5152	7.32728	7.32695	7.21778	7.23325	6.9484	7.04849	6.96012
ENSG00000088888	11.5434	11.6645	11.6653	11.5336	11.5927	11.6237	11.6654	11.4042	11.5414	11.7603	11.7006	11.6967	11.9688	12.2392	11.6526	11.8846	11.9449	11.6875	11.9983	12.0034	11.9554
ENSG00000088899	10.7291	10.5979	10.4739	10.301	10.5127	10.3601	10.3738	10.4407	10.3679	10.6435	10.7344	10.5661	10.9623	11.0872	11.0371	11.4507	11.4083	11.2415	11.5692	11.6211	11.4888
ENSG00000088926	9.72787	9.98888	9.97166	9.90336	10.1567	10.0689	9.90661	9.84861	9.82739	9.74857	9.74668	9.79108	9.5837	9.66086	9.67591	9.26958	9.39685	9.31429	8.63975	8.48453	8.67006
ENSG00000088930	10.5862	10.5051	10.5915	10.6004	10.5198	10.6977	10.5281	10.6833	10.5768	10.6658	10.6324	10.7328	10.7537	10.8007	10.7212	10.8782	10.7918	10.8133	11.1471	11.1102	11.101
ENSG00000088970	8.10975	8.29532	8.1281	7.9375	8.27946	7.94181	7.92896	8.0352	7.65819	7.93198	8.1692	8.06337	7.74509	7.74252	8.03997	7.7614	7.64617	7.84624	7.84389	7.83569	7.66726
ENSG00000088986	12.0126	11.9009	12.0421	12.1447	12.0332	12.0424	12.0671	12.1936	12.2091	11.6775	11.8159	11.9506	11.865	11.8979	12.0296	12.0264	11.9639	12.2147	11.9027	11.9209	12.004
ENSG00000088992	5.84041	5.50346	5.39468	5.63892	5.55931	5.00843	5.47399	5.21775	5.80264	5.76175	5.54685	5.52555	5.46114	5.9375	5.51249	5.752	5.52133	5.8289	6.20231	6.04147	6.44162
ENSG00000089006	11.1918	11.2307	11.2093	11.309	11.3575	11.3488	11.1626	11.3129	11.2531	11.1679	11.2069	11.2524	11.2109	11.1293	11.1761	11.174	11.1523	11.1469	11.0172	10.8926	11.0017
ENSG00000089009	13.623	13.5417	13.5469	13.6359	13.6588	13.6195	13.4391	13.7503	13.599	13.393	13.4548	13.5217	13.4901	13.3916	13.5815	13.5365	13.4111	13.7018	13.5253	13.5935	13.5978
ENSG00000089022	9.50257	9.54815	9.66387	9.51264	9.62436	9.5784	9.54265	9.3911	9.5697	9.63636	9.75496	9.71444	9.85136	9.90557	9.73002	9.86277	9.94808	9.85822	9.94451	9.95801	10.0025
ENSG00000089041	7.17864	7.82484	7.91403	7.55724	7.90121	7.99504	7.75977	7.37857	7.64068	7.5084	7.24647	7.41258	6.44467	6.35299	6.69483	5.52226	5.7575	5.50289	3.42719	2.92006	3.43896
ENSG00000089048	8.76112	8.66816	8.63211	8.62797	8.60609	8.84777	8.75143	8.69699	8.41307	8.93426	8.9385	9.00722	9.10193	9.10339	9.03461	9.31022	9.17627	9.23196	9.63794	9.44561	9.54925
ENSG00000089050	9.64914	9.57308	9.99472	9.70922	9.65728	9.62347	9.88162	9.68156	9.93902	9.67528	9.65229	9.78982	9.69728	9.60412	9.5896	9.51355	9.63928	9.47275	9.28873	9.06483	9.17562
ENSG00000089053	11.4145	11.3991	11.4544	11.4176	11.4503	11.4653	11.4237	11.4543	11.4626	11.3721	11.3641	11.3951	11.3083	11.346	11.348	11.2078	11.1967	11.2247	11.098	11.1161	10.9974
ENSG00000089057	8.93344	8.9143	9.16359	9.11651	9.20177	9.1145	9.29284	9.05386	9.19706	9.13893	9.12577	9.03953	8.92156	9.14513	9.02675	8.96818	9.13704	9.00405	9.14419	8.86846	8.97726
ENSG00000089060	9.58713	9.65942	9.54152	9.45235	9.54214	9.48382	9.46938	9.48671	9.57201	9.56464	9.68733	9.44372	9.53429	9.45055	9.4959	9.62405	9.52235	9.45767	9.80111	9.89082	9.6362
ENSG00000089063	11.1109	11.1477	11.3302	11.3889	11.3027	11.3577	11.4323	11.3565	11.4707	11.0617	11.0833	11.3124	11.1022	10.9682	11.2033	11.0536	11.0499	11.1474	11.0241	10.908	11.0268
ENSG00000089091	5.06728	3.94044	4.62327	4.99512	5.07868	5.20194	4.35585	4.96997	4.73235	4.92085	4.28886	4.77697	4.65014	4.74616	4.78655	4.73143	4.42104	4.8125	4.75587	4.4281	4.88948
ENSG00000089094	8.76112	8.74914	8.38061	8.30332	8.68058	8.57375	8.48807	8.48083	8.3923	8.708	8.71478	8.77107	8.92156	9.12023	8.73025	8.94514	9.0125	9.04724	9.17428	9.17959	9.15311
ENSG00000089123	7.53065	7.42567	7.45312	7.30788	7.44861	7.48288	7.56237	7.59851	7.44277	7.36817	7.73924	7.6764	7.40739	7.34413	7.54105	7.48438	7.37514	7.46548	7.46454	7.27188	7.19855
ENSG00000089127	7.29814	7.06706	6.98523	7.14475	7.2326	7.27265	7.11717	7.4449	7.18944	6.92739	7.14929	7.2155	7.08026	6.88683	6.95995	6.60121	6.43918	6.52599	5.54015	5.50269	5.4872
ENSG00000089154	11.8886	11.945	11.8113	11.7242	11.871	11.9132	11.7228	11.7679	11.6988	11.9967	11.9509	11.9127	11.9787	12.0904	11.9608	11.9999	11.9262	11.9777	12.0117	12.0438	12.018
ENSG00000089157	14.557	14.5958	14.5885	14.6962	14.6431	14.6128	14.5231	14.7317	14.7116	14.3573	14.4618	14.4633	14.3764	14.3007	14.579	14.5678	14.4779	14.6759	14.5358	14.5865	14.5687
ENSG00000089159	11.0303	11.0657	11.0098	11.0435	10.9322	10.9494	11.051	10.9434	11.0999	11.1112	11.0817	11.0396	11.0823	11.0815	11.0947	11.163	11.26	11.0926	11.7005	11.7111	11.5392
ENSG00000089163	7.68772	7.40361	7.8376	7.70924	7.90852	7.81435	7.74474	7.85787	7.88329	7.30478	7.52352	7.59757	7.3628	7.01244	7.38581	6.58805	6.95827	7.0753	5.94742	5.84939	5.86493
ENSG00000089177	9.12341	9.08693	9.09301	8.85916	9.08402	9.1175	8.98263	8.97468	8.99834	9.30604	8.93121	9.13033	9.17467	9.4461	9.1159	8.94514	9.0125	9.03147	9.42693	9.52815	9.36572
ENSG00000089195	8.12922	7.98944	8.11521	7.93162	8.03416	8.17878	7.98121	8.21702	8.10374	8.356	8.21795	8.4474	8.42136	8.43701	8.54819	8.761	8.67176	8.74985	9.03513	9.18774	9.10234
ENSG00000089220	14.5791	14.7036	14.6378	14.6738	14.7541	14.7321	14.4987	14.7704	14.549	14.4278	14.5662	14.5368	14.435	14.4013	14.5679	14.3401	14.2234	14.3651	13.7796	13.66	13.7779
ENSG00000089234	9.12017	9.03045	9.0963	8.89886	9.15336	9.13835	8.8319	9.03783	8.83091	9.16593	9.07706	9.08358	9.14645	9.28365	9.1811	9.22565	9.21248	9.15508	9.62017	9.67594	9.48223
ENSG00000089248	11.9469	11.9102	11.8939	12.0079	12.044	12.0369	11.8681	12.085	11.9864	11.741	11.9377	11.8295	11.7954	11.8415	11.9539	11.8412	11.7884	11.8805	11.6188	11.6786	11.7165
ENSG00000089280	11.8617	11.9635	11.8706	11.7229	11.8988	11.7539	11.8831	11.7999	11.7098	12.0703	11.9799	11.9381	11.9355	12.1169	11.8975	12.0934	12.0871	11.9815	12.3794	12.5074	12.4668
ENSG00000089289	9.39408	9.13124	9.37845	9.42124	9.40153	9.36249	9.265	9.4926	9.32859	9.16816	9.36097	9.3264	9.09967	9.21736	9.38549	9.49957	9.40035	9.48768	9.48265	9.58015	9.44195
ENSG00000089327	5.26798	3.34108	4.20345	4.6956	3.71653	4.78488	4.64214	4.67064	5.32125	4.92085	4.75304	4.81729	5.31277	3.09353	4.68365	5.10846	5.0382	4.8125	6.89684	7.32456	7.09846
ENSG00000089335	9.16189	9.22545	9.19842	9.23643	9.23466	9.15362	9.20897	8.90617	9.05561	9.11275	9.16122	9.16864	9.06632	9.12761	9.04472	8.84194	8.91142	8.88324	8.62398	8.41126	8.65409
ENSG00000089351	9.78832	9.84279	9.71817	9.58556	9.7879	9.56307	9.58787	9.77638	9.66586	9.901	9.62995	9.5537	9.72983	9.72466	9.88747	10.3141	10.1115	10.1297	10.8945	11.1059	10.8066
ENSG00000089356	5.60112	5.32712	5.11278	5.48693	5.12962	5.24652	5.63487	5.2552	5.63594	4.69229	4.93898	4.40605	3.79863	4.4232	3.8379	3.73785	3.6365	4.3722	2.68268	3.44004	3.17872
ENSG00000089472	9.48504	9.38318	9.52942	9.27574	9.3859	9.3851	9.17812	9.44882	9.3849	9.30199	9.50049	9.58323	9.27633	9.25343	9.30761	9.15378	9.05078	9.17366	8.97734	8.86846	8.90637
ENSG00000089486	10.5003	10.6279	10.4472	10.4149	10.4946	10.3639	10.5015	10.5605	10.5097	10.4456	10.6143	10.4306	10.6783	10.6762	10.8231	10.9017	10.8254	10.8676	10.8688	10.8341	10.7774
ENSG00000089505	3.75603	3.67166	4.37939	3.58035	4.72428	3.18359	3.32032	4.3628	3.72046	3.30397	3.86799	4.89016	4.11768	3.55648	4.14183	3.11299	3.89599	3.68463	3.27393	4.372	3.55337
ENSG00000089597	13.3233	13.391	13.4368	13.5035	13.4313	13.4853	13.5551	13.4971	13.5138	13.4054	13.4235	13.4241	13.3378	13.437	13.4739	13.3824	13.4031	13.3117	13.3018	13.2046	13.2669
ENSG00000089639	8.09662	7.85767	7.89907	7.40439	7.64523	7.63315	7.33361	7.52375	7.79108	8.08129	8.12516	7.87568	8.39946	8.354	8.20696	8.85738	8.64256	8.58994	9.21695	9.29535	9.17114
ENSG00000089682	8.93344	9.10413	8.89604	8.87762	9.00437	9.1145	8.79831	8.79243	8.69758	9.23131	9.09021	8.99628	9.13102	9.21475	8.86274	9.05443	8.86612	8.91112	9.00195	8.9329	9.22392
ENSG00000089685	6.31863	5.90005	6.37743	6.14478	5.88995	5.93227	5.92898	6.4929	6.72468	6.25641	6.13424	6.48499	5.91676	5.38918	5.83411	5.43675	5.14198	5.57922	4.86723	4.8123	4.84524
ENSG00000089692	3.88379	3.14222	3.08186	3.90219	4.35285	3.64972	4.06441	4.3628	3.58056	3.42813	3.86799	3.57014	3.12918	3.90642	3.73872	1.86576	2.74808	2.35221	2.08824	3.06865	3.02857
ENSG00000089693	12.1737	12.179	12.0396	12.123	12.1573	12.1001	12.0992	12.2355	12.1608	12.0253	12.137	12.0557	12.0046	12.0012	12.1679	12.0445	11.9835	12.0885	12.0098	12.0798	12.0018
ENSG00000089723	6.52869	6.64624	7.1204	7.08247	7.28971	7.11329	7.18558	7.06725	7.07679	6.72438	6.69523	6.8087	6.76328	6.84692	6.43458	6.44941	6.36962	6.67256	6.45496	5.98649	6.56948
ENSG00000089737	11.0372	11.0184	11.0391	10.9153	11.0543	10.9835	10.7683	11.0445	10.7744	11.0539	11.0717	11.0391	11.1352	11.1487	11.1554	11.2842	11.1616	11.2758	11.4053	11.4483	11.4184
ENSG00000089775	8.39354	8.5273	8.4795	8.67797	8.39328	8.51574	8.62575	8.12897	8.39752	8.45054	8.34955	8.37158	8.29654	8.27096	8.11109	7.86867	8.04013	7.96479	7.60773	7.49184	7.4333
ENSG00000089818	9.29949	9.28966	9.43886	9.35253	9.3568	9.56307	9.44943	9.35706	9.42349	9.33389	9.30848	9.4058	9.32169	9.13964	9.17163	9.22352	9.32517	9.38141	9.41094	9.46586	9.37158
ENSG00000089820	7.72232	7.43658	7.30203	7.39588	7.25571	7.36653	7.23663	7.3001	7.32714	7.43207	7.49414	7.067	7.51317	7.42769	7.42621	7.38897	7.29275	7.28734	6.9484	6.86758	7.06731
ENSG00000089847	6.48906	6.8229	6.37743	6.45445	6.97844	6.69771	6.43286	6.11918	6.3031	6.63701	6.84239	6.24008	6.56763	6.72007	6.40254	6.22976	6.20365	6.22707	5.47131	5.27688	5.54366
ENSG00000089876	10.3577	9.98517	10.3153	10.3437	10.2183	10.1965	10.3664	10.3111	10.3193	10.3359	10.1435	10.4338	10.3833	10.306	10.4239	10.6352	10.7238	10.6651	11.0692	11.0539	11.0354
ENSG00000089902	10.0894	10.096	10.1623	10.093	10.1319	10.1993	10.2488	10.0996	10.1014	10.1444	10.1947	10.1119	10.2601	10.1831	10.0463	10.1163	10.2202	10.1465	10.3714	10.3176	10.3409
ENSG00000089916	10.0163	10.2179	10.1482	10.1255	10.1067	10.0423	10.2541	10.0011	10.1283	10.2576	10.1701	10.2453	10.3379	10.4361	10.0884	10.3339	10.5523	10.2821	10.9651	10.9778	10.9302
ENSG00000090006	5.48502	5.41798	5.63041	5.20456	5.8601	5.33175	5.05355	5.32731	5.02999	5.71376	5.15464	5.47604	5.40361	5.35163	5.38711	5.3768	4.96462	5.4223	5.01965	5.246	5.6244
ENSG00000090013	10.114	10.186	10.026	10.3315	10.3109	10.1311	10.0223	10.4026	10.3785	9.80835	10.0558	9.99597	10.1884	10.1466	10.4815	10.4994	10.3432	10.5153	10.3643	10.4437	10.3178
ENSG00000090020	7.73932	7.4794	7.53285	7.37004	7.59173	7.21774	7.64027	7.46901	7.75085	7.68056	7.69688	7.76151	7.94987	8.20932	7.95966	8.09484	8.28649	8.1346	8.76367	8.85573	8.66371
ENSG00000090054	9.8	9.63318	9.79862	9.88241	9.77582	9.90346	9.91212	9.88456	10.0018	9.93737	9.79271	9.92843	9.76595	9.84723	9.83633	9.81391	9.91727	9.75339	10.1723	10.1351	10.1732
ENSG00000090060	12.0966	12.0482	12.2008	12.225	12.1271	12.1346	12.1885	12.1839	12.2228	12.2137	12.15	12.255	12.2186	12.2237	12.1712	12.3234	12.4227	12.2917	12.579	12.5416	12.5199
ENSG00000090061	10.8833	10.8624	10.7911	10.7023	10.7418	10.7314	10.6387	10.8562	10.8382	10.8018	10.8519	10.8504	10.8895	10.8959	10.9954	10.9825	10.9208	10.8765	11.2032	11.1664	11.082
ENSG00000090097	10.6805	10.4881	10.3418	10.1885	10.3822	10.1606	10.1647	10.4213	10.4469	10.5544	10.5093	10.424	10.8557	10.9129	10.9867	11.197	11.2196	11.1682	11.2622	11.2275	11.1704
ENSG00000090238	9.38601	9.3888	9.22788	9.42752	9.32982	9.21326	9.27725	9.44071	9.22082	8.94729	9.17598	8.90804	8.63015	8.68734	8.87739	8.56001	8.41979	8.50444	8.29602	8.31634	8.0837
ENSG00000090263	9.57535	9.56067	9.54152	9.64243	9.63542	9.83165	9.548	9.67811	9.55809	9.10444	9.48315	9.48341	9.38437	9.22776	9.29893	9.27985	9.03963	9.39393	8.81666	9.04254	8.95921
ENSG00000090266	10.525	10.467	10.376	10.7339	10.5055	10.5025	10.5223	10.6668	10.6343	10.0996	10.3366	10.2953	10.2335	9.99504	10.3075	10.3111	10.2053	10.4482	10.0951	10.255	10.2281
ENSG00000090273	11.2193	11.1485	11.1332	11.0871	11.2007	11.1694	10.9404	11.2556	11.1222	11.2947	11.1841	11.2567	11.3916	11.4141	11.5203	11.737	11.576	11.6599	12.0166	11.9871	11.9967
ENSG00000090316	10.8524	10.8512	10.6828	10.6867	10.7641	10.7216	10.7596	10.8043	10.7923	10.6845	10.7562	10.7884	10.8389	10.8696	10.8714	10.9326	10.8676	10.8809	10.9604	10.9385	11.0366
ENSG00000090339	11.2261	10.8109	10.8202	10.5995	10.6907	10.6816	10.4546	10.9101	10.8295	10.8574	10.8227	10.9859	10.5249	10.1217	10.6573	10.2787	10.2466	10.4405	10.4947	10.6129	10.7737
ENSG00000090372	10.6221	10.6374	10.5621	10.4044	10.5282	10.4474	10.4028	10.6165	10.4644	10.6555	10.6657	10.5646	10.6919	10.7583	10.7269	10.9208	10.8492	10.86	11.0545	11.0556	11.0598
ENSG00000090376	7.481	8.04038	7.78158	7.7894	7.82599	8.05892	7.73969	7.62736	7.78313	7.58376	7.51379	7.78711	7.46477	7.24523	7.30145	6.56137	7.15301	6.97527	6.41886	6.43286	6.54203
ENSG00000090382	10.5397	10.6051	10.6915	10.9198	10.64	10.6622	10.9193	10.8401	11.0022	10.3448	10.5798	10.6736	10.2032	10.1629	10.4158	9.90573	10.1104	10.2542	9.79231	9.85801	10.015
ENSG00000090402	3.61584	2.9115	3.45366	3.80268	4.17025	3.51044	3.08589	3.55657	4.66467	2.66124	2.84444	3.74753	2.62439	3.79894	3.8379	3.29504	3.06212	3.20354	2.08824	2.5672	0.922201
ENSG00000090432	10.0794	10.0647	10.0278	10.1611	9.9508	10.1041	10.0572	10.1402	10.1221	10.1216	10.1916	9.99597	10.1175	10.062	10.2814	10.2106	10.2093	10.1806	10.3844	10.4041	10.2716
ENSG00000090447	7.21554	7.33531	7.04083	7.27112	7.07257	7.34619	7.22945	7.02451	7.07679	7.41394	6.99002	7.11396	7.46477	7.27562	7.40211	7.29492	7.0852	7.3898	7.0581	6.57631	6.7362
ENSG00000090470	8.59368	8.67738	8.50444	8.73307	8.61952	8.65454	8.63665	8.51982	8.61482	8.63579	8.52928	8.67287	8.54624	8.59798	8.50358	8.72238	8.7395	8.63236	8.65147	8.67626	8.67323
ENSG00000090487	10.6175	10.6953	10.8222	10.978	10.8126	10.7673	10.9954	10.9851	10.9772	10.6697	10.7989	10.7814	10.7216	10.6561	10.7715	10.794	10.7832	10.8414	10.7889	10.7751	10.7855
ENSG00000090512	7.85297	8.37119	8.1661	8.37002	8.51323	8.44577	8.18804	8.06187	8.31162	7.61021	7.82039	7.75114	7.3628	7.25543	7.12614	6.62718	6.58134	6.8979	5.63762	5.33673	5.88692
ENSG00000090520	11.0432	10.9218	10.9218	10.9706	11.0885	10.9372	10.9463	11.0185	10.9356	10.8717	10.9634	10.9347	10.6576	10.6894	10.8155	10.8033	10.7314	10.8008	10.9822	10.9983	10.9328
ENSG00000090530	7.55964	7.18818	6.98523	6.72293	7.17313	6.87854	7.07771	6.83963	7.35961	7.42888	7.25817	7.41914	7.24491	6.9384	7.27514	7.26215	7.13636	7.3898	7.66279	7.69986	7.80065
ENSG00000090534	8.19844	8.35978	8.31447	8.28038	8.26244	8.26798	8.1467	8.31339	8.3659	8.19926	8.23581	8.2987	8.27665	8.23532	8.28812	8.23229	8.10149	8.15968	8.08759	8.14699	8.35218
ENSG00000090539	10.348	10.6759	10.2607	10.2861	10.4031	10.1635	10.3342	10.2416	10.266	10.313	10.3761	10.0498	10.0228	10.0488	10.0681	9.80839	9.78265	9.52031	9.07046	9.03127	9.00265
ENSG00000090554	4.90688	5.35314	4.10255	4.60693	4.90534	5.35229	4.06182	5.16441	4.96001	4.15906	3.45819	4.06532	4.29204	4.27062	5.00672	4.38335	4.45475	3.87026	3.74672	3.74754	3.43539
ENSG00000090565	10.5862	10.6747	10.4459	10.4808	10.6433	10.5894	10.3762	10.4599	10.4317	10.5996	10.629	10.4191	10.6108	10.6733	10.6186	10.529	10.4708	10.4121	10.3368	10.4119	10.3107
ENSG00000090581	10.5003	10.5918	10.2983	10.4338	10.5423	10.3601	10.2585	10.5828	10.4021	10.3049	10.4771	10.2333	10.3608	10.1737	10.4088	10.3928	10.2811	10.3973	10.4361	10.4232	10.3077
ENSG00000090612	9.76361	9.75619	9.81504	9.76316	9.90949	10.0375	9.64297	9.65378	9.57892	9.81262	9.83526	9.7707	9.72544	9.6837	9.66413	9.57153	9.49158	9.45767	9.26604	9.37957	9.34004
ENSG00000090615	11.4886	11.5423	11.3782	11.3152	11.4301	11.5094	11.3737	11.2092	11.1371	11.6176	11.4829	11.6061	11.8073	11.8453	11.4133	11.5558	11.5459	11.4353	11.7893	11.7895	11.8194
ENSG00000090621	12.3733	12.3911	12.286	12.3112	12.4279	12.3343	12.2915	12.3643	12.3184	12.3438	12.3457	12.2997	12.363	12.3325	12.3979	12.4266	12.4094	12.3188	12.5708	12.5348	12.4425
ENSG00000090661	10.9668	11.0823	10.9365	10.9484	11.0731	11.0313	10.9606	10.9928	10.9675	10.8861	11.0039	10.8129	10.7687	10.7393	10.9407	10.7236	10.6914	10.7356	10.3185	10.3651	10.2789
ENSG00000090674	8.65295	8.41045	8.30287	8.48282	8.33359	8.43522	8.53808	8.5275	8.57349	8.29141	8.49013	8.32341	8.35462	8.42734	8.43395	8.71332	8.87333	8.69436	9.28372	9.40403	9.22133
ENSG00000090686	10.4327	10.4128	10.433	10.3056	10.4031	10.3915	10.2559	10.2999	10.2617	10.5103	10.3255	10.4281	10.4009	10.4417	10.3194	10.3171	10.3387	10.3626	10.3404	10.2647	10.3899
ENSG00000090776	9.90962	9.86516	9.72879	9.57993	9.68947	9.67738	9.44633	9.73556	9.63746	9.70627	9.71731	9.6093	9.61413	9.7006	9.79794	9.82531	9.68008	9.67615	10.0937	10.1546	9.9156
ENSG00000090857	10.3506	10.3726	10.4844	10.4429	10.2463	10.4649	10.4918	10.2583	10.292	10.4708	10.3813	10.3792	10.2503	10.3677	10.1754	10.0908	10.2367	10.0402	9.93947	9.90511	9.88188
ENSG00000090861	12.1146	12.3339	12.1924	12.0465	12.2687	12.2974	11.9303	12.2305	12.0561	12.3252	12.2497	12.1865	12.444	12.4697	12.3918	12.4768	12.368	12.3687	12.3809	12.3251	12.3086
ENSG00000090863	12.1118	12.1716	12.1397	12.0173	12.1477	12.1723	12.0982	12.0545	11.9048	12.1629	12.1378	12.0781	12.0641	12.1253	12.0585	11.9481	11.9104	11.8602	11.8609	11.9043	11.8561
ENSG00000090889	5.48502	4.68881	4.88868	4.99512	4.43615	4.95571	5.02064	4.77747	4.51897	5.8532	4.53954	5.52555	5.07551	4.56117	4.97264	4.28631	4.24577	4.89445	4.28019	3.90291	4.30707
ENSG00000090905	10.8524	11.0374	11.0577	10.842	10.9536	10.9958	10.8537	10.7322	10.7562	11.0978	10.9969	10.9307	11.0191	11.1057	10.914	10.7818	10.7958	10.7167	10.5942	10.5191	10.6538
ENSG00000090924	10.1091	9.90694	9.76639	9.606	9.61098	9.57622	9.6869	9.68328	9.73142	10.2032	10.0236	10.0069	10.2911	10.1944	10.1928	10.4844	10.5052	10.3572	11.0059	10.9755	10.9828
ENSG00000090971	8.79808	8.70921	8.54826	8.47476	8.51802	8.34175	8.45149	8.66951	8.59223	8.41721	8.6977	8.54366	8.48168	8.45482	8.80569	8.60643	8.58848	8.70229	8.4912	8.45107	8.45878
ENSG00000090975	9.63104	9.70524	9.57251	9.48482	9.56776	9.46036	9.43076	9.47286	9.63966	9.80119	9.78963	9.59632	9.7688	9.88272	9.71557	9.83926	9.83521	9.69771	10.1206	10.0613	9.9156
ENSG00000090989	9.67807	9.69392	9.70102	9.56673	9.7879	9.82615	9.58365	9.75366	9.62638	9.79543	9.62318	9.77326	9.86118	9.74833	9.642	9.9294	9.90201	9.86712	10.1178	10.0931	10.1069
ENSG00000091009	9.19749	9.46672	9.30606	9.32732	9.40652	9.37446	9.33976	9.27054	9.25921	9.49193	9.38824	9.50824	9.58603	9.49343	9.42285	9.54556	9.48541	9.62143	9.88993	9.75199	9.7917
ENSG00000091039	10.1978	10.0873	10.3921	10.3158	10.1567	10.2412	10.3105	10.1111	10.3479	10.4548	10.3517	10.5408	10.4647	10.4943	10.2229	10.4521	10.6553	10.4139	10.9953	11.0178	10.8967
ENSG00000091073	8.68808	8.59186	8.50181	8.55206	8.55906	8.47978	8.40248	8.5747	8.50499	8.64087	8.57761	8.43343	8.53346	8.54003	8.67442	8.82345	8.7058	8.62049	9.14261	8.94099	8.70427
ENSG00000091127	7.56918	7.32361	7.51332	7.45443	7.47839	7.46413	7.68822	7.4449	7.40179	7.77128	7.54278	7.82715	8.21109	8.35874	8.09112	8.50156	8.67176	8.61736	9.005	8.9329	9.07147
ENSG00000091129	8.32203	8.15708	8.29745	8.32141	8.31291	8.3366	8.54993	8.48083	8.52703	8.89445	8.79327	8.68108	9.85851	9.90719	9.4902	10.6762	10.6799	10.339	11.4451	11.4274	11.2954
ENSG00000091136	11.7456	11.5168	11.4979	11.3264	11.4584	11.3684	11.2575	11.4921	11.4558	11.8079	11.6409	11.736	12.0597	12.2357	11.9904	12.5788	12.5304	12.4393	12.8171	12.8317	12.8373
ENSG00000091137	1.17061	1.20464	2.57968	2.3179	2.21529	2.49067	0.806589	2.97291	2.55401	2.18603	2.57187	0.829407	2.81297	1.05418	2.52352	2.17828	1.78688	2.35221	3.27393	2.35205	2.19535
ENSG00000091140	11.3053	11.2197	11.4148	11.4306	11.3598	11.3984	11.361	11.4305	11.4356	11.3033	11.2855	11.3102	11.2955	11.2369	11.2038	11.1076	11.1351	11.1672	11.2092	11.1441	11.0886
ENSG00000091157	8.95906	8.96792	9.22788	9.18727	9.17777	9.22723	9.14224	9.02433	9.23838	9.13116	9.03006	9.25178	8.97684	9.03989	8.82697	8.9112	8.93275	8.80387	8.63975	8.73025	8.72907
ENSG00000091164	10.5311	10.4868	10.5236	10.5846	10.5505	10.613	10.7023	10.6651	10.6725	10.3546	10.5081	10.5881	10.7443	10.6513	10.6742	10.9023	10.8241	10.9002	11.075	11.1711	11.1103
ENSG00000091262	12.3286	12.5502	12.3667	12.3405	12.4776	12.4728	12.2952	12.3741	12.3338	12.2748	12.3424	12.1837	11.9441	12.0029	12.0418	11.5512	11.5678	11.5328	10.6661	10.5588	10.7041
ENSG00000091317	11.1895	11.2354	11.4537	11.5351	11.2059	11.3903	11.6109	11.337	11.4732	11.1741	11.3061	11.38	11.0149	11.0117	11.0475	10.8196	10.9592	10.9406	10.7773	10.7629	10.8294
ENSG00000091409	11.4276	11.5052	11.5916	11.593	11.5271	11.611	11.6443	11.5284	11.602	11.6495	11.6581	11.734	11.8513	12.0312	11.7847	12.0814	12.119	11.8628	12.968	13.0874	12.8115
ENSG00000091428	6.7793	6.26075	6.57868	6.68152	6.56259	6.71367	6.4203	6.6558	6.6034	6.55767	6.79499	6.62785	6.32581	6.48021	6.58491	6.7266	6.71074	6.68413	6.74472	6.99377	7.11718
ENSG00000091436	9.66256	9.47333	9.51477	9.64423	9.77195	9.68954	9.54944	9.66077	9.62638	9.78821	9.75908	9.91817	10.018	9.89256	9.77778	10.1965	10.2133	10.0403	10.6863	10.6114	10.501
ENSG00000091482	6.67718	6.35576	6.57868	6.43797	6.52503	6.61512	6.78613	6.73747	6.65663	6.5846	6.81096	6.44695	6.79718	6.54817	6.48135	6.42	6.21956	6.17883	5.99724	5.60358	5.4872
ENSG00000091483	10.9936	11.115	11.1858	11.1934	11.225	11.2254	11.0195	11.2579	11.0943	11.0587	10.9987	11.01	10.8225	10.8402	11.0572	10.9083	10.7432	10.9898	10.67	10.5915	10.6247
ENSG00000091490	9.10058	8.94136	9.22188	9.21414	8.8382	9.09024	9.16312	9.17362	9.16068	9.38286	9.51763	9.62783	9.87976	9.85951	9.73981	10.2899	10.3277	10.2099	10.9697	11.0017	10.8555
ENSG00000091513	18.5493	18.8603	18.8087	18.7082	18.8717	18.8856	18.5829	18.7244	18.5681	18.4717	18.5402	18.5157	18.1234	18.1378	18.222	17.8565	17.7711	17.85	17.3581	17.2715	17.3088
ENSG00000091527	12.947	12.8968	12.9254	12.8502	12.9267	12.8993	12.815	12.9701	12.8219	13.06	13.0324	13.0558	13.2193	13.17	13.1125	13.3043	13.3167	13.2732	13.6849	13.7054	13.6503
ENSG00000091536	5.77599	6.13247	6.2652	5.74995	6.00356	5.48844	5.94661	5.46154	5.52582	5.8082	5.85491	5.45064	5.67074	4.85749	5.17587	5.40709	4.88709	5.04559	4.69679	4.89425	4.79961
ENSG00000091542	11.1472	11.2134	11.208	11.1223	11.1789	11.1599	11.18	11.2515	11.1907	11.0623	11.2084	11.1072	11.1101	11.1266	11.2753	11.2365	11.1518	11.2262	11.1115	11.2447	11.0422
ENSG00000091583	14.3416	14.4387	14.4938	14.5987	14.5891	14.6166	14.516	14.6175	14.566	14.1415	14.2389	14.3551	13.9586	13.9114	14.1394	13.9138	13.8504	14.0081	13.5009	13.4465	13.5458
ENSG00000091622	7.39783	7.46882	7.14598	6.65323	7.17313	7.1012	6.90812	6.94652	7.07679	7.49426	7.18651	7.27461	7.08941	7.26556	7.10638	7.22862	6.92955	6.68413	7.3919	7.17684	7.41071
ENSG00000091640	10.2312	10.2859	10.1841	10.2606	10.266	10.1765	9.98548	10.3688	10.1502	10.051	10.1036	10.0403	10.0168	9.99352	10.2033	10.0567	10.0539	10.1806	10.0397	10.0887	10.0761
ENSG00000091651	7.61593	7.34692	7.36873	7.10353	7.03298	7.40636	7.42449	7.3615	7.40179	7.47999	7.07185	7.35896	7.23669	7.09428	7.17438	6.93843	7.22568	7.2644	6.62306	6.56384	6.66164
ENSG00000091656	8.14843	8.11016	8.43869	8.39159	8.27381	8.6253	8.2497	7.86999	8.19052	8.45784	8.2476	8.21442	8.15118	8.30573	8.00838	7.87951	8.05793	7.80445	7.89077	7.97874	7.70488
ENSG00000091704	3.61584	4.16691	2.85251	3.80268	4.06949	3.18359	3.61307	3.43127	4.07349	3.64837	3.44514	3.57014	3.12918	2.89903	3.39227	3.15928	3.06212	3.82165	3.27393	3.64332	3.17872
ENSG00000091732	8.78995	8.85456	8.64113	8.87762	8.96634	8.83688	8.87397	9.01618	8.68482	8.6196	8.55796	8.79145	8.79303	8.77149	8.73025	8.76977	8.89859	8.8888	8.86107	8.91828	8.86543
ENSG00000091844	3.46055	3.51582	3.99405	2.9956	4.17025	2.76032	3.32032	3.29405	3.72046	3.8394	3.74033	2.68677	3.60804	3.55648	3.10429	4.21961	4.11585	3.9031	5.89582	5.94863	5.74967
ENSG00000091879	3.28651	3.34108	3.60888	1.99623	3.05093	3.51044	4.45773	4.29249	1.78087	4.22901	3.86799	4.29623	3.96696	2.40767	3.39227	4.41111	4.18227	4.25298	4.86723	5.27688	5.57108
ENSG00000091947	9.0229	8.9903	8.94422	9.1035	8.97333	8.75052	8.90586	9.1086	9.12019	8.76798	8.76895	8.78638	8.58234	8.83749	8.8832	8.89527	8.8636	8.8888	8.63975	8.39587	8.35613
ENSG00000091972	3.88379	4.82787	4.10255	4.31715	3.96115	3.51044	4.06441	3.29405	4.51897	3.54245	4.37734	4.04781	3.79863	4.4232	3.8379	3.73785	3.53848	3.44023	4.35852	4.31362	4.24032
ENSG00000091986	4.83408	3.94044	4.76207	4.08273	4.66058	4.72313	3.7797	4.77747	4.17427	4.47917	4.99599	4.04781	4.43729	4.34893	3.10429	4.28631	4.24577	3.64351	4.75587	4.48211	4.88948
ENSG00000092010	10.8138	10.8934	10.8623	10.9198	10.9755	10.9264	10.7274	10.9711	10.7933	10.5947	10.7207	10.7109	10.6783	10.6988	10.7628	10.7047	10.5484	10.7251	10.4936	10.4996	10.463
ENSG00000092020	8.29355	8.49636	8.4073	8.78614	8.7796	8.67099	8.62575	8.79878	8.57851	8.24219	8.55322	8.48542	8.46771	8.44594	8.52977	8.42222	8.46385	8.50444	8.77443	8.83253	8.63476
ENSG00000092036	7.8634	7.8656	7.97952	8.13964	8.15613	8.00298	8.07541	8.19117	8.00273	7.62929	8.08289	8.17617	7.74045	7.97633	8.1502	7.79603	7.77432	8.14719	7.33123	7.44502	7.79484
ENSG00000092068	6.36316	6.15905	5.63041	6.22385	5.63178	6.29262	6.08039	5.96948	6.08744	6.38456	6.32432	6.39462	5.8101	5.77682	6.11681	5.95014	6.15487	6.05955	6.9859	7.2642	7.25881
ENSG00000092094	9.58478	9.83456	9.72456	9.72119	9.86696	9.85882	9.6671	9.60203	9.70218	9.74409	9.69811	9.58761	9.5837	9.65894	9.62474	9.66379	9.68008	9.54748	9.32088	9.3178	9.34004
ENSG00000092096	5.9899	6.2108	5.83297	5.80241	6.03062	5.45083	5.59071	6.23619	5.36455	5.66412	6.00133	5.42477	5.59566	5.83239	5.62785	5.84344	5.90246	5.98669	5.06708	5.246	4.9324
ENSG00000092098	9.58325	9.77801	9.63425	9.26096	9.53587	9.58749	9.36098	9.60879	9.54514	9.67224	9.66705	9.44346	9.59991	9.79646	9.76334	9.76105	9.65274	9.7745	9.86093	9.77757	9.73287
ENSG00000092108	10.2958	10.2585	10.4472	10.3862	10.4439	10.4605	10.4147	10.4679	10.4215	10.3644	10.2989	10.4289	10.4452	10.2382	10.3895	10.4172	10.3396	10.455	10.3773	10.3651	10.3259
ENSG00000092140	8.09001	7.98944	8.14088	8.08245	7.95163	8.06516	8.22463	7.99148	8.22617	8.22944	7.98434	8.2443	8.21109	8.36346	8.31419	8.24492	8.55754	8.38549	8.73459	8.69353	8.50572
ENSG00000092148	12.3007	12.4026	12.4332	12.4467	12.3791	12.5364	12.4254	12.2912	12.3827	12.482	12.4367	12.4822	12.3488	12.4446	12.273	12.1746	12.2814	12.1476	12.3235	12.3251	12.2999
ENSG00000092199	13.217	13.1475	13.24	13.3569	13.256	13.2334	13.2998	13.3396	13.3405	13.1245	13.1638	13.242	13.1674	13.0999	13.202	13.2188	13.1992	13.2938	13.2595	13.3172	13.2357
ENSG00000092201	10.982	10.8562	10.9217	10.6971	10.9509	10.8652	10.71	10.7971	10.6519	10.9967	11.055	11.0062	11.1168	11.0936	10.969	10.9937	10.9657	11.0854	11.1683	11.1325	11.1506
ENSG00000092203	10.8833	10.8973	10.97	10.8951	10.9833	11.0072	10.96	10.937	10.8807	10.958	10.8519	10.954	10.9187	10.8943	10.9484	10.9319	10.9111	10.9218	11.0611	11.0984	11.085
ENSG00000092208	7.17864	7.31181	7.17112	7.44621	7.37663	7.25094	7.37977	7.14912	7.35961	7.14206	7.08505	7.25272	7.35523	7.24523	7.23931	7.44843	7.29486	7.53101	7.25525	7.54355	7.62209
ENSG00000092295	5.17112	5.32712	4.76207	5.12439	3.96115	4.59107	4.5982	4.42985	5.13375	4.74099	4.81772	5.19928	4.5998	4.6255	4.57284	3.63923	2.91363	4.31382	4.19736	4.4281	4.01926
ENSG00000092330	9.42066	9.46536	9.46483	9.56293	9.59747	9.54087	9.52471	9.64146	9.62638	9.54249	9.61411	9.53569	9.59498	9.65124	9.70739	9.66693	9.61844	9.69199	9.87125	10.0457	9.84013
ENSG00000092421	9.93381	9.50994	9.55113	9.53994	9.41186	9.40244	9.70773	9.68328	9.63083	10.1228	10.1293	10.0936	10.8777	11.0125	10.7008	11.7918	11.7878	11.516	12.7713	12.8302	12.5804
ENSG00000092439	10.5457	10.71	10.9356	10.8845	10.6971	10.8517	11.0382	10.6317	10.8382	10.8407	10.8266	10.9569	10.8882	10.8762	10.6169	10.7001	10.8064	10.6221	10.9744	10.9307	10.9175
ENSG00000092445	10.2417	9.94372	9.84853	9.90486	9.92219	9.77	9.73842	9.93625	9.97788	9.85331	9.94067	9.85784	9.76309	9.75554	9.84787	9.67005	9.75837	9.82333	10.28	10.1865	10.0459
ENSG00000092470	3.75603	4.26808	4.62327	3.16545	4.58958	3.51044	4.35585	3.77859	4.73235	4.35951	3.86799	4.55653	3.79863	3.26489	3.8379	3.63923	3.89599	3.9802	3.10244	3.90291	4.30707
ENSG00000092529	6.47106	6.67176	6.42041	6.46002	6.26284	6.82015	6.62664	5.96271	6.64562	6.3634	6.30527	6.17688	6.29735	5.60239	5.81597	6.04063	6.26348	6.18258	5.72685	6.28423	6.11138
ENSG00000092531	10.5275	10.3023	10.4651	10.4778	10.3992	10.541	10.5097	10.6111	10.5372	10.314	10.4365	10.5172	10.4209	10.1657	10.3875	10.3081	10.3648	10.5015	10.4871	10.4947	10.425
ENSG00000092607	3.28651	3.14222	1.80282	2.58077	2.21529	2.15875	2.45797	3.77859	3.42564	4.08553	3.44514	3.57014	4.79141	4.68709	4.38883	5.10846	4.6728	5.24621	5.57338	5.36575	5.01458
ENSG00000092621	12.4588	12.6084	12.5611	12.4898	12.6486	12.596	12.4445	12.6662	12.5669	12.5274	12.6079	12.4635	12.6336	12.5937	12.6921	12.5446	12.4514	12.5968	12.1119	11.9636	12.0224
ENSG00000092758	2.85904	2.29702	2.24292	2.9956	2.21529	2.76032	2.45797	1.97681	3.25204	2.44311	3.2713	2.85113	1.44471	2.08053	1.53602	3.15928	2.09341	1.40186	2.08824	2.09909	3.17872
ENSG00000092820	12.2542	12.2139	12.1504	11.9404	12.1914	12.153	11.8945	12.172	11.9085	12.2316	12.1402	12.1576	12.25	12.294	12.2619	12.5486	12.4204	12.4523	12.8174	12.8461	12.7504
ENSG00000092841	14.162	14.0724	14.112	14.2453	14.2088	14.1684	14.0705	14.3161	14.3002	13.9322	13.9995	14.0155	13.9402	13.8765	14.2223	14.2288	14.0915	14.3117	14.1078	14.2314	14.2195
ENSG00000092847	10.3795	10.4563	10.5418	10.4968	10.497	10.4676	10.6175	10.4057	10.5849	10.6004	10.462	10.4785	10.4505	10.4857	10.511	10.3994	10.4906	10.4069	10.3702	10.1783	10.4099
ENSG00000092850	1.80823	1.20464	1.1664	0.997485	2.21529	1.10775	1.32086	2.55917	2.21862	1.47262	1.79614	1.35271	2.15191	1.65677	1.53602	2.43501	0.86147	2.09925	2.08824	1.79214	0.922201
ENSG00000092853	5.17112	3.94044	5.39468	4.16517	4.43615	4.72313	4.76646	4.77747	4.73235	5.22468	4.81772	4.96815	4.69878	4.00644	5.2133	4.82414	5.14198	4.53436	4.97061	4.63295	5.39815
ENSG00000092871	10.28	10.3947	10.4727	10.4898	10.3328	10.4331	10.5995	10.3848	10.5997	10.472	10.5239	10.572	10.8314	11.0378	10.794	11.118	11.0532	10.8446	11.5615	11.5756	11.4018
ENSG00000092929	5.77599	5.76811	5.73524	5.85303	5.63178	5.93227	5.20771	5.94677	5.02999	6.13412	6.30189	5.13693	6.05396	5.42577	5.13745	5.57657	5.32951	5.33694	5.6687	5.96768	5.51571
ENSG00000092931	8.88463	8.93368	9.01534	8.98366	8.9416	8.95575	9.17439	9.05916	9.07529	8.9421	8.93121	9.00722	8.9719	9.17231	8.8832	9.03759	9.07939	9.09785	9.09927	9.31965	9.12101
ENSG00000092964	8.91487	8.8907	8.97309	9.09037	9.03475	9.07178	8.99328	9.06181	9.15452	9.00825	8.86006	9.04378	8.68249	9.0604	8.64723	8.9112	8.99413	8.76355	9.18775	9.23961	9.02761
ENSG00000092969	9.89752	9.12198	9.36762	9.12542	9.02698	9.08497	9.07283	9.39541	9.30082	9.68661	9.53213	9.81202	9.12781	9.02461	9.15465	8.81268	9.00121	9.30432	9.42012	9.20523	9.653
ENSG00000092978	8.16739	8.39934	8.4283	8.61336	8.5036	8.63371	8.66887	8.50824	8.4687	8.46873	8.58144	8.63671	8.62071	8.59396	8.5555	8.57343	8.50336	8.39959	8.51704	8.45445	8.53037
ENSG00000093000	10.4402	10.4235	10.3955	10.5144	10.4639	10.5341	10.639	10.4456	10.4878	10.5819	10.4667	10.5877	10.5703	10.4889	10.5391	10.5324	10.5904	10.4897	10.7696	10.8242	10.8124
ENSG00000093009	3.46055	3.34108	3.74901	4.16517	3.57667	3.18359	4.68478	3.87797	3.42564	4.29573	4.37734	4.17736	3.88525	3.41804	4.01787	3.63923	3.72828	3.82165	4.0159	3.20335	4.01926
ENSG00000093010	9.83056	10.2477	10.0295	10.1523	10.1567	10.2134	10.221	10.2428	10.1988	9.7032	9.86999	9.89951	9.4604	9.36834	9.76524	9.32417	9.20252	9.39393	8.5508	8.50097	8.50216
ENSG00000093072	9.09068	9.12788	9.14468	9.15737	9.05136	9.06557	9.17999	8.94347	9.23838	8.9421	9.21252	9.03312	8.92922	8.94223	8.85388	8.75513	8.90352	8.60828	8.6	8.60503	8.54081
ENSG00000093134	5.67363	5.76811	5.73524	5.72298	6.32098	5.37254	5.83745	6.23619	6.2112	5.78516	5.46844	6.13235	5.83207	5.71902	5.80988	5.62891	5.00188	5.62795	4.35852	4.9718	5.09234
ENSG00000093144	10.6539	10.5844	10.6463	10.6388	10.7831	10.748	10.6106	10.6901	10.6639	10.5041	10.6313	10.7354	10.6298	10.577	10.6497	10.6471	10.607	10.7404	10.6292	10.5961	10.6682
ENSG00000093167	10.7023	10.8203	10.7666	10.8104	10.8932	10.9196	10.6775	10.929	10.7254	10.7809	10.7249	10.8259	10.7857	10.7155	10.7824	10.6613	10.5157	10.6519	10.7061	10.5745	10.5552
ENSG00000093183	9.40743	9.38035	9.45463	9.45235	9.49191	9.49079	9.61843	9.42847	9.59491	9.36355	9.48564	9.45175	9.55095	9.38933	9.29675	9.47297	9.54777	9.54273	9.46284	9.48582	9.47317
ENSG00000093217	8.93344	8.99768	9.04963	8.96939	9.19581	9.26293	8.86935	8.94634	8.94228	9.05955	9.1698	9.11222	9.17467	9.35417	9.16209	8.95799	9.03514	8.97609	8.3593	8.42028	8.50216
ENSG00000094631	11.7041	11.8534	11.6357	11.5317	11.7372	11.75	11.4598	11.6892	11.5998	11.6602	11.7016	11.573	11.7105	11.704	11.6277	11.5735	11.4715	11.4443	11.2788	11.1721	11.2356
ENSG00000094804	6.07267	6.10538	6.28836	6.28043	5.8601	6.18221	6.65287	5.87641	6.80546	6.4446	6.5505	6.72641	6.44467	6.1048	6.55607	5.95014	6.13823	6.28899	5.78672	5.57901	6.2343
ENSG00000094841	7.23963	7.23891	7.40096	7.3787	7.16094	7.31513	7.39269	7.54659	7.45284	7.02894	7.25817	7.26006	7.34763	7.4895	7.45774	7.46292	7.56759	7.81501	7.91041	7.77749	7.6023
ENSG00000094880	10.3591	10.451	10.5333	10.4233	10.4994	10.4851	10.4752	10.4346	10.5145	10.3595	10.4696	10.4346	10.2812	10.2096	10.3032	10.1163	10.1147	10.1116	9.81853	9.84904	9.8763
ENSG00000094914	10.071	10.1827	10.137	10.1204	10.2402	10.072	10.1178	10.1588	10.2985	9.99811	10.0423	9.9297	9.98525	9.86285	10.1281	9.8517	9.77326	9.86458	9.52784	9.50388	9.52842
ENSG00000094916	11.2314	11.2517	11.4298	11.4181	11.2547	11.4671	11.5063	11.2163	11.4564	11.3692	11.3004	11.4598	11.2731	11.3328	11.0443	10.7919	11.098	10.9704	10.7746	10.6384	10.7611
ENSG00000094975	10.2521	10.14	10.4663	10.4254	10.297	10.2645	10.4155	10.2966	10.3904	10.4575	10.4608	10.5609	10.5037	10.5493	10.3097	10.5706	10.8351	10.6289	11.1471	11.2121	11.122
ENSG00000095002	8.01525	8.38815	8.18473	8.17986	8.36166	8.39717	8.10019	8.46893	8.23203	8.21659	8.34955	8.18005	8.15554	7.97633	8.09112	7.80754	7.86416	7.99761	7.5916	7.51145	7.6736
ENSG00000095015	9.54668	9.27794	9.50245	9.40648	9.24573	9.40981	9.40708	9.13897	9.47656	9.52521	9.35825	9.59921	9.41016	9.4638	9.43186	9.33209	9.58661	9.46271	9.55304	9.6846	9.55097
ENSG00000095059	9.65526	9.62159	9.46351	9.55	9.55125	9.50345	9.3695	9.53322	9.54723	9.37134	9.5146	9.35884	9.36056	9.47065	9.43418	9.37461	9.45221	9.56024	9.47004	9.58259	9.54078
ENSG00000095066	10.2432	10.41	10.181	9.95642	10.2646	10.2685	10.1457	10.1124	10.0055	10.4364	10.338	10.0614	10.3646	10.4067	10.2825	10.2063	10.1709	10.0548	9.99902	9.93021	9.99746
ENSG00000095139	12.0788	12.095	12.1758	12.2163	12.0885	12.1324	12.2289	12.2107	12.2374	12.1201	12.1734	12.2948	12.1628	12.1436	12.1599	12.1279	12.2277	12.1947	12.4451	12.3812	12.3813
ENSG00000095203	11.3216	11.3816	11.5358	11.562	11.5025	11.6284	11.521	11.4931	11.4589	11.3129	11.3347	11.4618	11.1571	11.0721	11.0745	10.8019	10.765	10.8054	10.5012	10.4163	10.3666
ENSG00000095209	8.3989	8.3191	8.57675	8.64244	8.51802	8.44099	8.87397	8.49656	8.55534	8.21659	8.54369	8.55264	8.26862	8.37754	8.2925	8.48745	8.63072	8.44789	9.16068	9.29535	9.04482
ENSG00000095261	10.3285	10.1467	10.4407	10.3503	10.4312	10.3614	10.4044	10.357	10.4304	10.318	10.3517	10.3927	10.2891	10.2522	10.2758	10.2073	10.2495	10.2347	10.2236	10.2216	10.2726
ENSG00000095303	7.33214	7.31181	7.2791	7.64604	7.0463	7.44513	7.51589	7.14912	7.25994	6.7484	7.13667	7.18501	6.60639	6.27491	6.52664	5.72821	6.01608	5.8289	5.60586	5.44946	5.20164
ENSG00000095319	10.151	10.26	10.1402	10.1574	10.04	10.1385	10.2291	10.0906	10.2048	10.2407	10.1763	10.1509	10.2762	10.1831	10.2491	10.3171	10.3666	10.2416	10.53	10.5183	10.3879
ENSG00000095321	11.4835	11.6875	11.6542	11.5121	11.5594	11.6321	11.5089	11.7071	11.6043	11.4159	11.5909	11.5041	11.4077	11.4496	11.5184	11.306	11.2538	11.2614	10.9051	10.8572	10.7935
ENSG00000095380	10.0541	10.0576	10.0174	10.0811	10.1841	10.1562	10.0734	10.1588	10.1455	9.93279	10.0321	10.0667	10.0511	9.95022	10.1644	10.1636	9.98692	10.0911	10.3584	10.3379	10.282
ENSG00000095383	9.02982	9.27491	9.18842	9.0034	9.03809	8.99221	8.83899	9.1188	8.94228	9.13209	9.08036	8.91037	8.94191	8.91031	9.10101	8.72238	8.73397	8.76627	7.91041	8.20434	7.99031
ENSG00000095397	8.06327	7.91339	8.03534	7.80877	7.82599	7.8581	7.78938	7.85787	7.88329	8.02832	8.09286	7.85646	7.77942	8.04851	7.88045	7.93253	7.63435	7.76686	7.82332	7.87154	7.6736
ENSG00000095485	8.282	8.29532	8.3201	8.40437	8.48416	8.3672	8.59534	8.56899	8.40272	8.39836	8.35501	8.39508	8.47122	8.2507	8.43791	8.36936	8.52911	8.33868	8.456	8.25563	8.40647
ENSG00000095539	12.6431	12.9955	12.8967	12.7636	12.8898	12.9102	12.7557	12.754	12.7059	12.631	12.7617	12.5357	12.3212	12.2794	12.3707	11.7205	11.6809	11.7428	10.6825	10.4665	10.5474
ENSG00000095564	10.5481	10.5447	10.6339	10.5648	10.4982	10.5786	10.6873	10.3699	10.5348	10.6395	10.5372	10.5735	10.5558	10.6542	10.5147	10.4412	10.5539	10.4086	10.5479	10.5534	10.4893
ENSG00000095574	9.07403	8.96792	8.94057	9.04754	9.07104	9.07487	9.18927	9.10091	9.17898	9.10212	8.90912	8.98084	8.83444	8.92316	8.70748	8.7433	8.83033	8.77712	8.79218	8.72746	8.67006
ENSG00000095585	5.35875	5.96176	5.63041	5.6955	6.00356	5.56083	5.71935	6.13935	5.32125	5.71376	5.58451	5.54968	5.0382	4.91009	4.68365	4.52597	4.18227	4.12303	3.6921	4.12283	3.93735
ENSG00000095587	2.85904	3.51582	2.24292	2.58077	1.77785	2.49067	3.61307	3.97095	2.55401	3.42813	2.23553	2.50124	2.62439	3.09353	2.26299	2.43501	1.78688	2.92024	2.41586	3.06865	2.19535
ENSG00000095596	9.31127	9.1346	9.16359	9.19955	8.91095	8.92179	9.04329	9.00797	9.0622	8.70493	8.86006	8.96522	8.15554	7.98862	8.29917	7.21995	7.12795	7.33214	5.5562	5.28602	5.42845
ENSG00000095637	10.5457	10.6816	10.6474	10.538	10.6672	10.7177	10.6216	10.5446	10.5383	10.6705	10.5774	10.6347	10.5011	10.4911	10.6334	10.2487	10.3817	10.3472	9.84938	9.75072	9.95386
ENSG00000095713	3.61584	3.67166	3.45366	3.90219	1.77785	3.64972	3.32032	3.87797	2.82595	3.8394	4.19458	3.97839	2.62439	2.40767	3.25546	3.29504	3.19675	3.06883	3.10244	3.64332	3.17872
ENSG00000095739	11.1295	10.6468	10.6926	10.8215	10.7149	10.6352	10.8025	10.8968	10.9194	10.8344	10.8644	10.8691	10.8409	10.7628	10.9656	10.8012	10.8149	10.9804	10.585	10.6966	10.7066
ENSG00000095777	2.85904	4.05811	3.45366	3.45486	3.96115	3.18359	3.7797	3.77859	3.42564	3.54245	3.2713	3.57014	3.70648	4.56117	3.93069	3.91692	3.31987	2.92024	3.56572	3.98	4.24032
ENSG00000095787	11.4823	11.5296	11.4563	11.4049	11.4831	11.4782	11.3163	11.5236	11.3297	11.5581	11.4475	11.5858	11.6004	11.5179	11.5499	11.5668	11.5593	11.5832	11.8805	11.8632	11.7927
ENSG00000095794	8.95906	8.949	8.88469	8.87149	8.98028	8.98893	8.88086	9.06181	8.90976	8.99073	8.82509	9.0459	9.03956	9.03989	9.15489	9.31821	9.42112	9.29744	9.75479	9.82965	9.74553
ENSG00000095906	10.187	10.3083	10.0449	10.1873	10.1567	9.90648	10.1685	10.3189	10.2152	9.95618	10.187	9.98274	10.0915	10.1105	10.2858	10.1911	10.0416	10.1444	9.83917	10.0434	9.89676
ENSG00000095951	8.92604	8.97167	9.10284	8.87456	8.94871	8.86217	8.74137	8.72729	8.78782	9.02801	9.09674	9.08976	9.05132	8.75361	8.833	8.9006	9.01933	8.85338	9.1931	9.16728	9.18674
ENSG00000096060	10.9874	11.1756	11.0678	11.0311	11.225	11.2413	10.9573	11.1821	10.9675	11.1562	11.0775	11.1118	11.1883	11.1971	11.1299	11.1641	11.1246	11.1459	11.2757	11.2471	11.2673
ENSG00000096063	10.8248	10.6987	10.7799	10.67	10.8175	10.849	10.8502	10.857	10.9048	11.013	10.9544	11.0165	11.2534	11.2732	11.1244	11.3942	11.4174	11.3688	11.7454	11.7804	11.7096
ENSG00000096070	11.1887	11.3306	11.1633	11.0249	11.1857	11.1482	11.1191	11.1009	11.0708	11.2669	11.3061	11.1978	11.2846	11.3466	11.2428	11.2678	11.3508	11.2561	11.5432	11.5202	11.5326
ENSG00000096080	9.9115	9.96271	9.7787	10.0062	9.9258	9.73131	9.80758	9.97745	10.0021	9.67997	9.66333	9.78728	9.71513	9.73927	9.97723	10.0192	9.96939	10.047	10.1717	10.1135	10.0398
ENSG00000096088	14.387	14.5591	14.5578	14.7014	14.4956	14.4872	14.5768	14.6197	14.5928	14.0473	14.2204	14.2196	13.8537	13.8381	14.1263	13.8992	13.8251	13.944	13.6546	13.6636	13.5939
ENSG00000096092	9.8126	9.94563	10.2116	10.2465	10.0988	10.0904	10.2968	10.199	10.1823	9.93148	9.93339	9.99816	9.85851	9.80499	10.045	9.69941	9.71835	9.82986	8.96174	8.99225	9.20436
ENSG00000096093	8.34995	8.24061	8.19089	8.13964	8.11223	8.25713	8.18433	8.30448	8.0384	8.07655	8.08631	7.9859	8.15989	7.66045	7.90353	7.99867	7.92362	8.05237	7.88476	7.75024	7.85185
ENSG00000096384	14.3246	14.25	14.2782	14.2334	14.2813	14.272	14.1856	14.4037	14.289	14.4243	14.3917	14.3977	14.6735	14.6948	14.6846	15.0862	15.016	15.0103	15.5403	15.5555	15.4455
ENSG00000096401	10.0371	10.0128	10.0381	9.93749	10.1241	10.1649	10.0275	10.1452	9.96739	10.2659	10.0338	10.2202	10.1948	10.2599	10.2068	10.2643	10.2123	10.2811	10.5645	10.5143	10.5187
ENSG00000096433	8.25861	7.75684	7.66257	7.24293	7.59173	7.64984	7.58506	7.60578	7.65819	8.27976	8.15049	8.03374	8.64884	8.851	8.43395	9.43305	9.52715	9.27084	10.9366	11.115	10.8762
ENSG00000096654	7.57865	7.58121	7.35783	7.19467	7.72193	7.35639	7.66178	7.29112	7.57768	7.64901	7.41273	7.84188	7.76236	7.61364	7.76548	7.63913	7.48447	7.82026	7.5916	7.40365	7.59564
ENSG00000096696	13.513	13.6153	13.4917	13.2335	13.5523	13.6499	13.1559	13.3285	13.1821	13.7228	13.6449	13.5885	13.7636	13.8337	13.5729	13.6765	13.577	13.6484	13.7461	13.684	13.7471
ENSG00000096717	8.92975	9.09728	9.06647	9.11392	8.90917	9.03095	9.18927	8.92616	9.0222	9.02063	9.07044	9.07321	8.92922	8.82726	8.81789	8.84637	8.93516	8.76082	9.38544	9.50388	9.3618
ENSG00000096746	10.89	10.8358	10.786	10.9138	10.8126	10.8161	10.817	10.9174	10.8553	10.9918	11.0013	10.9647	11.1202	11.1253	11.0675	11.2979	11.247	11.182	11.5061	11.481	11.5658
ENSG00000096872	8.69297	8.72264	8.83445	8.53025	8.95226	8.78493	8.37868	8.81455	8.54596	8.73229	8.58609	8.66736	8.74752	8.58185	8.52233	8.53623	8.58542	8.5367	8.16046	7.9881	8.30397
ENSG00000096968	8.23485	7.87381	8.37522	8.24765	8.22779	8.22963	8.33918	8.22176	8.2025	8.49736	8.32751	8.22943	8.32781	8.36817	8.33556	8.39603	8.43689	8.35686	8.13843	8.52046	8.34028
ENSG00000097007	11.0355	10.9686	10.8468	10.6559	10.8473	10.8152	10.7794	10.8494	10.7521	11.0563	11.1069	10.9495	11.261	11.3555	11.2614	11.4259	11.4183	11.3065	11.6934	11.609	11.5525
ENSG00000097021	9.45442	9.56316	9.37575	9.32813	9.631	9.3826	9.33361	9.58558	9.33407	9.24825	9.31969	9.33337	9.43549	9.39857	9.51662	9.64485	9.49648	9.56948	9.46062	9.21988	9.39094
ENSG00000097033	11.1614	11.1318	11.292	11.228	11.1375	11.306	11.1777	11.3027	11.1786	11.2803	11.2294	11.3347	11.3659	11.2987	11.2791	11.4561	11.4674	11.3967	11.7159	11.7349	11.6925
ENSG00000097046	5.67363	5.41798	5.63041	5.90194	5.52166	5.48844	5.67773	5.87641	5.80264	6.3998	5.69194	5.90806	5.76512	5.38918	5.70869	5.72821	5.90246	5.47652	5.47131	5.6515	5.77347
ENSG00000097096	7.73932	7.73049	7.82973	7.74318	7.92304	7.87239	7.62393	7.53901	7.55916	7.82874	7.66207	7.86129	7.49951	7.56526	7.68785	7.45569	7.57996	7.45201	7.27558	7.27953	6.96012
ENSG00000099139	9.64463	9.23173	9.4262	9.4503	9.38065	9.3851	9.52618	9.39321	9.35569	9.92622	9.90017	9.85057	10.1051	10.2497	10.0227	10.3408	10.3046	10.3252	10.7394	10.6649	10.7567
ENSG00000099194	16.8311	17.2426	17.307	17.2318	17.2405	17.304	17.2944	17.1424	17.1867	16.9304	17.0057	17.0809	16.6062	16.7987	16.8018	16.5333	16.531	16.4406	15.8834	15.6456	15.8987
ENSG00000099203	9.40743	9.36045	9.22489	9.22859	9.30233	9.30305	9.03301	9.36136	9.41353	9.10677	9.11616	9.17756	9.02533	9.10339	9.45353	9.20855	9.20651	9.30495	9.16613	9.24938	9.30577
ENSG00000099204	11.7488	11.6863	11.6954	11.6514	11.6079	11.6638	11.7903	11.6151	11.7725	11.8642	11.7366	11.8657	11.7968	11.8419	11.711	11.8132	11.9253	11.8416	11.9834	11.9574	11.9212
ENSG00000099219	10.7034	10.8399	10.9736	11.0455	10.7661	10.935	11.0397	10.8661	11.0511	10.947	10.9634	11.0375	11.072	11.0467	10.94	11.0896	11.2255	11.0328	11.2302	11.1639	11.1392
ENSG00000099246	11.1408	11.0365	11.314	11.1755	11.1258	11.1643	11.2894	11.2994	11.3228	11.1517	11.0399	11.3115	11.2886	11.2142	11.2719	11.5345	11.5475	11.4758	12.2165	12.2671	12.0757
ENSG00000099250	11.0903	10.7256	10.9283	10.9272	10.7479	10.7057	10.931	10.9384	11.0005	11.0766	10.9651	11.1269	10.9796	10.8975	10.9225	10.9254	10.9966	11.0685	11.0706	11.0006	11.1324
ENSG00000099256	5.52477	5.73314	5.11278	5.66749	5.02587	5.20194	4.88092	5.36206	4.85886	5.68915	5.75935	5.19928	5.64614	5.77682	5.45116	5.72821	5.44222	5.92952	5.36147	5.21444	5.77347
ENSG00000099260	10.9821	10.9573	10.931	10.8822	11.0493	11.0667	10.6106	10.9283	10.8237	10.8773	10.8403	10.8073	10.4942	10.251	10.5128	9.5898	9.56965	10.0357	7.95521	7.5562	8.19803
ENSG00000099282	8.7189	8.13046	8.4073	8.43377	8.41397	8.11409	8.38516	8.42029	8.43862	8.58334	8.67169	8.59674	8.88786	8.96417	9.0935	9.2778	9.30295	9.35828	9.11628	9.15279	9.19778
ENSG00000099284	9.39944	9.27187	9.3567	9.42543	9.30787	9.22166	9.14796	9.35274	9.34762	9.28156	9.26275	9.33684	9.43549	9.4638	9.48829	9.53771	9.53512	9.54273	9.44499	9.34901	9.52842
ENSG00000099290	10.5818	10.5641	10.5269	10.4439	10.6614	10.6111	10.3366	10.484	10.3447	10.7376	10.6761	10.6643	10.7244	10.6885	10.5825	10.8531	10.8268	10.7631	11.3173	11.3184	11.1786
ENSG00000099308	9.45192	9.76703	9.55113	9.39585	9.57697	9.50002	9.46938	9.35274	9.33407	9.51999	9.53215	9.34376	9.26829	9.31325	9.25698	8.98082	8.95192	8.87877	8.6974	8.58666	8.62171
ENSG00000099326	8.83412	8.85456	8.54346	8.49083	8.57885	8.26256	8.66089	8.41203	8.34444	8.6926	8.76485	8.53159	8.73299	8.88753	8.82999	8.88723	8.85853	8.7471	9.09927	9.08678	8.99508
ENSG00000099330	9.64238	9.75401	9.60745	9.70233	9.70215	9.68347	9.61843	9.81921	9.73349	9.45761	9.60955	9.5759	9.51065	9.40087	9.53891	9.44587	9.29547	9.46271	8.48248	8.71342	8.74119
ENSG00000099331	11.2808	11.406	11.0819	10.8087	11.3006	11.1866	10.9064	11.0391	10.8937	11.4027	11.3634	11.1299	11.5445	11.6446	11.4471	11.6044	11.417	11.5099	11.6527	11.7118	11.6123
ENSG00000099337	3.75603	4.26808	3.87673	3.90219	3.96115	3.64972	3.52193	3.55657	4.17427	4.22901	4.68532	4.29623	4.69878	3.55648	4.25167	4.63236	4.71828	4.76971	6.45496	6.8977	6.19958
ENSG00000099338	5.22037	4.89267	4.88868	4.94932	5.02587	4.52022	4.88092	4.49392	4.59366	5.1181	5.42758	4.69279	5.37396	5.00988	4.83537	5.3768	5.00188	4.89445	5.24258	5.69788	4.88948
ENSG00000099341	11.4677	11.5039	11.4665	11.5893	11.5259	11.4481	11.2755	11.6564	11.5158	11.2772	11.3862	11.3652	11.321	11.3813	11.5993	11.5843	11.4728	11.5913	11.733	11.7443	11.6824
ENSG00000099364	8.65318	8.34161	8.37522	8.02841	8.3402	7.99504	8.29169	8.26362	8.05832	8.68329	8.67606	8.428	8.55287	8.74248	8.79956	8.84075	8.82514	8.80916	9.17968	9.31594	9.1689
ENSG00000099365	6.27268	6.73727	6.44081	6.31696	6.56259	6.66524	6.59814	6.2548	5.95206	6.7484	6.45206	6.03314	6.03514	5.8859	5.90443	5.70402	5.90246	5.52878	4.86723	5.30712	4.60111
ENSG00000099377	10.3535	10.4657	10.3652	10.3905	10.4589	10.3902	10.4124	10.4916	10.5606	10.2301	10.3116	10.2202	10.132	10.095	10.2536	9.79413	9.71695	9.80358	9.07046	8.96407	9.04238
ENSG00000099381	9.67807	9.86718	9.61891	9.53607	9.72303	9.55423	9.47395	9.54079	9.55575	9.92359	9.84693	9.61788	9.75161	9.78576	9.69917	9.80839	9.72672	9.75642	9.87292	9.84519	9.80736
ENSG00000099385	9.22342	9.12788	8.98022	9.05297	9.21363	9.05934	8.96544	9.28871	8.94941	8.85904	9.11937	9.06696	9.07454	8.93591	9.22528	9.28393	9.0924	9.3087	9.10496	9.30287	9.09763
ENSG00000099617	8.45141	8.7137	8.68104	8.42961	8.62397	8.7113	8.3224	8.68331	8.52703	8.6196	8.7442	8.3817	8.89832	8.7572	8.92891	8.85738	8.78295	8.62338	8.48248	8.59587	8.48424
ENSG00000099622	11.9561	12.1142	11.9724	11.9847	12.065	11.946	11.9159	12.0038	11.9504	11.9506	12.0421	11.8509	11.8388	11.8617	11.8556	11.6664	11.6687	11.6104	11.392	11.4351	11.4432
ENSG00000099624	10.7814	10.7122	10.6339	10.6788	10.6455	10.5764	10.7451	10.9641	10.8071	10.3904	10.5833	10.347	10.5383	10.4683	10.9147	10.6199	10.6002	10.6415	10.2534	10.3669	10.3178
ENSG00000099625	6.29584	5.66057	5.26061	4.6956	5.27247	5.15594	5.29288	5.80243	5.40659	6.22252	6.05597	5.50101	6.52779	6.54817	6.38624	7.40406	7.36802	7.22535	8.51277	8.80631	8.41784
ENSG00000099769	6.46882	6.95014	6.54062	6.33488	6.93614	6.5632	6.28825	6.42878	6.56679	6.07835	6.13424	6.2839	5.54335	5.27348	5.97149	5.18037	5.0382	4.89445	3.27393	3.20335	3.17872
ENSG00000099783	11.5519	11.4968	11.4115	11.2942	11.505	11.4771	11.2588	11.4748	11.4139	11.6302	11.5822	11.4681	11.6707	11.7086	11.6695	11.7702	11.6364	11.6712	11.8016	11.7638	11.78
ENSG00000099785	10.6991	10.9072	10.7779	10.8015	10.7999	10.7037	10.7627	10.8003	10.7764	10.4828	10.6018	10.5347	10.3636	10.3614	10.6859	10.389	10.3639	10.4507	9.89773	9.89207	9.79142
ENSG00000099795	10.621	10.8078	10.7395	10.9535	10.7721	10.7275	10.6481	10.9584	11.0527	10.4262	10.6245	10.4918	10.4236	10.3291	10.739	10.6754	10.5198	10.7188	10.3844	10.336	10.3627
ENSG00000099797	11.1647	11.4196	11.3403	11.4054	11.3887	11.3285	11.329	11.4972	11.3829	11.0191	11.1236	11.0617	10.9113	10.8966	11.1393	10.8468	10.8521	10.8681	10.3836	10.4338	10.3837
ENSG00000099800	10.5103	10.3764	10.2505	10.4958	10.3703	10.0935	10.2743	10.5745	10.4842	10.0666	10.32	10.123	10.259	10.1991	10.6342	10.4737	10.3639	10.6244	10.4518	10.4403	10.4992
ENSG00000099804	10.8727	10.6987	10.5751	10.593	10.7139	10.7344	10.6141	10.8231	10.7714	10.7023	10.8364	10.7149	10.9365	10.9313	11.0008	11.3	11.1841	11.257	11.5401	11.7026	11.5296
ENSG00000099810	9.67365	9.71647	9.80504	9.73475	9.67024	9.80022	9.7697	9.66774	9.67664	9.80692	9.91503	9.93323	10.0083	10.0978	9.94422	10.2684	10.3027	10.2669	10.4518	10.3497	10.3499
ENSG00000099814	11.6416	11.563	11.4009	11.2274	11.4521	11.3577	11.304	11.283	11.193	11.7536	11.7527	11.4602	11.832	12.0245	11.7734	12.0957	12.0716	11.922	12.482	12.4834	12.3601
ENSG00000099817	11.6131	11.6691	11.5681	11.5404	11.6324	11.5389	11.4525	11.6892	11.585	11.3788	11.5076	11.4116	11.3943	11.4418	11.6641	11.5651	11.4536	11.5583	11.4479	11.4053	11.4547
ENSG00000099821	11.0572	11.1076	10.9077	10.8182	11.0138	10.8284	10.8626	10.9426	10.9085	11.0505	11.1195	10.9503	11.1981	11.294	11.2662	11.1608	11.0811	11.1429	10.7487	10.8074	10.686
ENSG00000099822	4.76937	5.07125	4.69434	4.58014	4.43615	4.65861	4.1276	3.97095	4.51897	4.35951	4.68532	4.35219	4.37878	4.18782	4.38883	3.99875	4.6728	4.12303	4.19736	5.11369	4.75249
ENSG00000099834	3.08855	3.34108	3.60888	2.3179	2.55049	3.35625	2.45797	2.55917	3.42564	3.54245	3.60027	3.36785	2.62439	2.89903	3.63222	3.29504	3.89599	3.32673	2.41586	2.92006	3.02857
ENSG00000099840	7.52086	7.82484	7.31337	7.27112	7.67983	7.79196	7.46786	7.71061	7.44277	7.16008	7.41273	7.06457	7.07105	6.92568	7.04544	6.84195	6.92955	6.86779	5.92185	5.76477	6.0517
ENSG00000099849	10.2009	10.2994	9.90017	9.94626	10.0284	9.99895	9.9737	10.1175	10.0576	9.98427	10.0971	9.86025	9.8758	10.0764	10.2389	10.2487	10.0315	10.0987	10.0218	10.0151	10.0038
ENSG00000099860	9.59182	9.58539	9.43919	9.56293	9.66809	9.65482	9.43389	9.62546	9.46417	9.23556	9.2915	9.24376	9.09513	9.03989	9.11095	8.88185	8.72007	8.73603	9.5941	9.72995	9.3967
ENSG00000099864	10.5164	10.6965	10.4702	10.309	10.6257	10.5139	10.141	10.4896	10.2873	10.3369	10.368	10.2324	10.2852	10.3072	10.3885	10.2643	10.0122	10.1806	9.7384	9.7032	9.61988
ENSG00000099866	5.22037	5.50346	5.11278	5.12439	5.22641	5.10843	5.34698	5.05738	5.36455	5.15451	5.25147	4.45797	4.99989	5.14769	5.35398	4.86835	4.24577	4.4823	4.57083	4.05318	4.24032
ENSG00000099869	9.28547	9.8033	9.49251	9.23577	9.60873	9.53638	9.21678	9.44882	9.30935	9.10909	9.4011	9.13233	8.55287	8.21978	8.60913	7.32695	7.29486	7.56894	5.78672	5.47632	5.57108
ENSG00000099875	12.1053	12.1975	12.0366	11.9911	12.1399	12.0125	12.0549	12.1101	12.0896	12.0329	12.1438	11.9853	12.2673	12.3137	12.3029	12.7513	12.74	12.5509	13.3486	13.4342	13.1386
ENSG00000099889	10.7077	10.5167	10.3068	10.0864	10.3822	10.2753	10.1304	10.3397	10.2386	10.735	10.7111	10.5438	11.2147	11.4362	11.2896	11.8859	11.7898	11.6122	12.0998	12.154	12.108
ENSG00000099899	9.63332	9.56813	9.48251	9.53413	9.59067	9.53414	9.41343	9.65378	9.60398	9.52695	9.62544	9.58469	9.77449	9.78928	9.82991	9.8722	9.64959	9.73294	9.93335	9.87324	9.77235
ENSG00000099901	10.2138	10.1676	10.1298	10.0546	10.1626	10.1832	10.1414	10.306	10.1657	10.1789	10.003	10.1802	10.2487	10.2368	10.3318	10.4611	10.4095	10.4811	10.4092	10.5319	10.4966
ENSG00000099904	10.135	10.2258	10.0209	10.0584	10.0166	9.97432	10.0893	10.097	10.227	10.245	10.276	10.076	10.199	10.1911	10.2659	10.2518	10.2202	10.1989	10.3013	10.298	10.2227
ENSG00000099910	9.34497	9.53553	9.17295	9.09037	9.14719	9.26834	9.18557	9.32879	9.24384	9.20768	9.30848	9.19279	9.27633	9.31569	9.34391	9.25924	9.30109	9.32534	9.28372	9.1918	9.20873
ENSG00000099917	10.8495	10.8379	10.7437	10.5677	10.7489	10.7236	10.5967	10.7364	10.7233	10.8512	10.8247	10.7718	11.0268	11.0275	11.0566	11.2863	11.2338	11.1427	11.6868	11.7342	11.6136
ENSG00000099937	13.4056	13.6693	13.6142	13.5024	13.7264	13.739	13.3511	13.6185	13.5228	13.3431	13.446	13.3713	13.0726	13.0075	13.1819	12.7553	12.6818	12.757	12.056	11.8311	11.9148
ENSG00000099940	10.4916	10.5967	10.5089	10.5341	10.6134	10.6529	10.523	10.6432	10.6332	10.4557	10.5622	10.5997	10.4813	10.5072	10.577	10.5571	10.6662	10.5654	10.7394	10.8674	10.7371
ENSG00000099942	11.1591	11.2046	11.3728	11.3343	11.2177	11.2205	11.419	11.2399	11.4241	11.3144	11.2442	11.3009	11.222	11.2993	11.2183	11.2413	11.344	11.2316	11.2541	11.2324	11.2726
ENSG00000099949	11.1058	11.1469	10.9677	10.9183	11.014	10.9178	10.93	10.9848	11.0182	11.1246	11.1508	10.9776	11.0951	11.2074	11.1452	11.1991	11.122	11.112	11.3184	11.2823	11.2129
ENSG00000099953	10.2116	10.2798	10.3111	10.1126	10.2095	10.1979	9.92117	10.0525	9.9831	9.74559	9.92607	9.83715	9.35621	9.25089	9.38344	8.76977	8.90843	9.02694	8.07605	8.06973	7.96985
ENSG00000099954	8.41485	8.72264	8.72414	8.54187	8.52754	8.74665	8.62848	8.28197	8.68055	8.82274	8.63626	8.71882	8.71241	8.97655	8.43791	8.65772	8.72564	8.562	8.54243	8.37461	8.43286
ENSG00000099956	11.1117	11.0893	10.9529	11.0516	11.0176	10.9852	11.0206	11.1098	11.1055	11.0884	11.1037	11.0116	11.092	11.128	11.1863	11.197	11.1156	11.1846	11.1866	11.2046	11.1642
ENSG00000099958	5.26798	5.23015	4.82677	4.94932	5.596	4.65861	4.50609	4.87693	5.48716	4.47917	3.74033	4.69279	4.3178	2.67417	4.38883	4.28631	2.91363	4.18947	3.56572	3.06865	4.17033
ENSG00000099960	2.58599	1.85184	1.1664	1.58161	2.55049	2.15875	2.80582	2.55917	2.55401	2.44311	2.57187	2.28829	1.84122	2.89903	2.93542	3.91692	3.97306	3.32673	5.39902	6.14554	5.20164
ENSG00000099968	10.4496	10.5102	10.5938	10.5361	10.5482	10.5399	10.5636	10.5043	10.6076	10.578	10.5891	10.5513	10.6061	10.659	10.6725	10.6613	10.6567	10.6408	10.7302	10.7451	10.7649
ENSG00000099974	6.9696	7.55473	7.55067	7.4342	7.35313	7.22866	7.24306	7.47387	7.27102	6.90609	7.1903	6.88986	6.50144	6.74924	7.08786	6.51818	6.47194	6.36182	6.17508	5.78833	6.02796
ENSG00000099977	12.11	12.3063	12.1333	12.3268	12.2868	12.3011	12.3256	12.3766	12.4062	11.7428	11.8942	11.994	11.7579	11.8228	11.992	11.863	11.7367	12.0045	11.4747	11.5768	11.5875
ENSG00000099984	5.36402	3.29196	4.99047	4.55222	3.91311	4.13645	3.88659	3.60146	5.66325	4.11835	3.93367	2.86504	2.96865	5.18275	3.48209	2.82428	2.7322	2.87089	2.86976	2.23614	3.09959
ENSG00000099991	10.6106	10.7651	10.5514	10.4462	10.6865	10.5764	10.4155	10.5207	10.4444	10.6274	10.6268	10.4547	10.4611	10.4032	10.4564	10.1965	10.2202	10.3417	9.85276	9.88832	9.84575
ENSG00000099992	7.93757	8.27146	7.99825	7.95736	7.86146	8.02093	7.78356	8.08451	7.97269	8.07798	8.20978	7.96761	8.20399	8.06095	8.22081	8.30015	8.1808	8.44823	8.74557	8.82594	8.8576
ENSG00000099994	5.17112	5.32712	5.05993	5.3874	5.12962	5.52509	4.50609	5.2917	5.02999	5.2916	5.15464	4.7355	5.37396	5.38918	4.97264	4.58014	4.80515	4.89445	3.91583	4.63295	3.3147
ENSG00000099995	11.4854	11.487	11.4447	11.3124	11.4546	11.3878	11.2455	11.4703	11.2124	11.5115	11.5021	11.4397	11.5155	11.5607	11.5739	11.5872	11.514	11.5492	11.641	11.5335	11.5525
ENSG00000099998	5.01242	3.01293	3.03663	3.90219	4.22469	4.10193	3.84207	4.21857	4.78811	4.6352	3.78113	3.97839	3.75145	3.09353	4	3.20964	2.83488	3.28844	4.26318	4.34835	3.02857
ENSG00000099999	9.44417	9.55568	9.1915	9.30331	9.32982	9.19915	9.37325	9.23114	9.31764	9.36549	9.32526	9.19869	9.22536	9.11183	9.21609	9.06634	9.06185	8.77441	8.8976	8.66463	8.72602
ENSG00000100003	7.72232	7.60074	7.42205	7.45443	7.2209	7.60774	7.3991	7.48486	7.27136	7.56954	7.71397	7.61483	7.69201	7.97015	7.56809	8.03791	7.8987	8.11726	8.71239	9.01533	8.7442
ENSG00000100014	11.1294	11.1646	11.052	10.8724	11.0268	11.1113	10.823	10.9612	10.8081	11.2091	11.1508	11.1354	11.2669	11.2662	11.1887	11.2254	11.1901	11.2052	11.3926	11.2646	11.3756
ENSG00000100023	10.5382	10.6514	10.5297	10.5302	10.4958	10.5162	10.5075	10.5716	10.4444	10.5164	10.5503	10.4563	10.4425	10.4825	10.4693	10.4069	10.4139	10.4608	10.1932	10.0876	10.0998
ENSG00000100024	9.07403	9.20646	8.94786	8.96939	9.01117	9.1175	8.78856	8.96058	8.96707	8.80853	8.92389	8.9057	8.61755	8.68357	8.75901	8.05236	8.05793	8.20856	7.28564	7.05741	7.20731
ENSG00000100027	6.82777	6.56904	6.59735	6.24296	6.70375	6.71367	6.43286	6.37875	6.47099	6.84067	6.74597	6.45974	6.69298	6.74924	6.68154	7.28679	6.87034	6.86779	6.57465	6.64893	6.28485
ENSG00000100028	10.4865	10.3685	10.6099	10.466	10.5833	10.6306	10.6349	10.546	10.5787	10.5814	10.5257	10.5624	10.582	10.5143	10.7159	10.5943	10.5288	10.3932	10.4882	10.5119	10.4639
ENSG00000100029	10.2162	10.1876	10.1048	9.90936	10.1241	10.0055	9.75477	10.2977	10.0543	10.2397	10.2543	10.132	10.3786	10.4158	10.5185	10.6471	10.4955	10.6636	10.9141	10.9464	10.8783
ENSG00000100030	12.0304	12.0348	12.2668	12.2841	12.1057	12.1372	12.3607	12.1219	12.2892	12.1842	12.1834	12.2919	12.2382	12.2656	12.2223	12.277	12.4404	12.2538	12.4163	12.3788	12.3328
ENSG00000100031	11.0059	10.8602	10.8284	10.824	10.9283	10.7983	10.644	10.8559	10.9048	10.7051	11.0582	10.8572	10.7554	10.6578	11.05	10.6027	10.6118	10.8366	10.3919	10.3166	10.4769
ENSG00000100033	9.61961	10.0036	9.70533	9.65318	9.73953	9.56527	9.33025	9.63259	9.48639	9.513	9.33081	9.13433	8.91127	8.98577	9.03722	8.56001	8.71166	8.57759	8.13287	8.09594	7.98522
ENSG00000100034	9.33662	9.36901	9.16359	9.17985	9.1595	9.09024	9.13264	9.35058	9.22963	9.51999	9.5702	9.28585	9.2212	9.45276	9.36693	9.27164	9.37039	9.19605	9.09641	9.24157	9.19997
ENSG00000100036	5.60112	5.23015	4.69434	5.03951	5.27247	5.24652	4.84376	5.39599	4.59366	5.38649	5.25147	5.39844	4.96053	5.1032	5.48215	5.10846	5.0382	5.52878	4.81262	5.6515	5.1297
ENSG00000100038	9.78218	10.0434	9.60975	9.49681	9.79383	9.56746	9.52765	9.48808	9.53458	9.6862	9.73626	9.56706	9.54098	9.76984	9.69917	9.68712	9.70084	9.63141	9.60418	9.48698	9.52492
ENSG00000100056	8.51693	8.56258	8.36436	8.30332	8.51802	8.31583	8.31223	8.5275	8.32812	8.55297	8.52445	8.3682	8.48515	8.62576	8.84795	8.74627	8.67176	8.59608	8.67079	8.81686	8.75321
ENSG00000100060	5.77599	6.44488	5.26061	5.60978	5.97599	5.66303	5.23666	5.13979	5.67086	5.41679	5.29756	5.79147	5.56974	5.62774	5.51249	5.99071	5.54676	5.30732	6.40046	6.16217	5.77347
ENSG00000100065	11.1472	10.9946	10.8671	10.7943	10.8185	10.8059	10.805	10.902	10.9257	11.0742	11.1278	10.9953	11.2063	11.2888	11.3637	11.4808	11.4405	11.348	11.7098	11.8724	11.705
ENSG00000100075	12.9997	13.2545	13.1215	13.1009	13.2656	13.1694	13.0718	13.326	13.1692	12.9855	13.1016	12.9663	12.9666	12.9883	13.1617	13.0002	12.8615	12.9123	12.3253	12.1715	12.2848
ENSG00000100077	8.36646	8.20252	8.23923	8.37436	8.19229	8.23517	8.27783	8.00803	8.23786	8.48669	8.27665	8.28798	8.38838	8.23016	8.26603	8.28625	8.37789	8.18025	8.71612	8.73582	8.61843
ENSG00000100079	7.23963	7.3812	7.52312	7.47073	7.42841	7.41615	7.17065	7.38703	7.39136	6.8738	7.08505	6.8087	6.51427	6.27491	6.7721	6.73856	6.1214	6.46023	5.6687	5.52858	5.51571
ENSG00000100083	10.5445	10.5333	10.3209	10.2547	10.3796	10.3255	10.2708	10.331	10.2473	10.5155	10.4158	10.3121	10.5574	10.623	10.6099	10.6893	10.6842	10.4726	10.6777	10.8197	10.7789
ENSG00000100084	10.1124	10.1266	10.0618	9.88943	10.0115	10.0704	9.84052	10.1766	9.82739	10.2661	10.1451	10.2628	10.4409	10.4528	10.3876	10.5159	10.4647	10.5384	10.5458	10.4756	10.5613
ENSG00000100092	7.04616	7.53151	6.91257	6.79034	7.0463	7.23631	6.82478	7.13874	6.69903	7.10533	7.32645	7.02209	7.10076	7.15002	7.19323	7.23708	7.07763	7.12707	7.53369	7.54019	7.46857
ENSG00000100095	4.30495	5.32712	4.54851	4.38752	4.91408	4.8441	4.91713	4.49392	4.79699	4.15906	4.53954	5.45064	4.25413	5.23276	4.83537	4.68274	4.36495	4.25298	3.42719	4.12283	4.70377
ENSG00000100097	5.80856	5.62287	5.89463	5.20456	5.07868	5.00843	5.29288	5.99184	5.63594	5.19002	5.29756	5.19928	4.92007	5.19085	5.88137	5.43675	5.20723	5.76498	5.99724	6.27355	6.03211
ENSG00000100099	10.4663	10.6255	10.6271	10.4677	10.5668	10.5071	10.6414	10.4728	10.5595	10.5329	10.4746	10.4698	10.4487	10.444	10.4378	10.2899	10.3139	10.2706	10.0618	9.96499	10.0809
ENSG00000100100	9.73424	10.0073	10.0381	9.70578	9.94725	9.96934	9.56665	9.73721	9.6637	9.42072	9.54654	9.40456	8.42498	8.39148	8.48074	6.9692	7.12795	7.45877	5.01965	5.21444	5.42845
ENSG00000100104	9.85804	9.91085	9.79698	9.94917	9.91676	9.903	9.89417	9.99278	9.89356	9.80692	9.76729	9.80494	9.83558	9.80325	9.83742	9.8225	9.82615	9.75093	9.69566	9.68604	9.68093
ENSG00000100105	9.77189	9.70524	9.71391	9.64782	9.92219	9.75272	9.74725	9.7924	9.83895	9.78241	9.78155	9.70238	9.77307	9.69311	9.86707	9.6512	9.69721	9.67325	9.38544	9.27828	9.35983
ENSG00000100106	10.1948	10.1746	9.96448	9.81675	10.0384	9.95094	9.71418	9.89976	9.77219	10.0985	10.1116	9.91469	10.167	10.3963	10.2126	10.4503	10.3595	10.284	10.4179	10.5431	10.4023
ENSG00000100109	9.89453	10.02	9.99647	9.7991	9.82315	9.91168	9.68559	9.92031	9.7822	9.93279	9.86426	9.82113	10.0581	10.0459	10.133	10.1492	10.1316	10.0581	10.3679	10.3515	10.3469
ENSG00000100116	8.56538	8.64012	8.45413	8.67094	8.69334	8.64208	8.55855	8.76023	8.59678	8.39456	8.64965	8.57339	8.45715	8.37754	8.57	8.49099	8.31267	8.54941	8.10474	8.42373	8.21551
ENSG00000100124	8.49208	8.45404	8.56732	8.56103	8.75952	8.42168	8.33918	8.71726	8.47365	8.42096	8.67606	8.56749	8.26459	8.34924	8.50735	8.35389	8.43689	8.53989	8.10474	8.25174	8.28753
ENSG00000100129	12.3828	12.436	12.5007	12.552	12.4996	12.4633	12.4145	12.5568	12.517	12.3418	12.4215	12.4482	12.303	12.2787	12.3539	12.3211	12.3246	12.4937	12.4351	12.4166	12.3564
ENSG00000100138	10.3673	10.3651	10.3125	10.441	10.2886	10.319	10.2717	10.5417	10.4891	10.229	10.2688	10.2108	10.2376	10.1356	10.4098	10.5359	10.3958	10.5701	10.5374	10.6376	10.579
ENSG00000100139	9.87736	9.76487	9.63029	9.5087	9.51844	9.55201	9.41343	9.61469	9.61522	9.97412	10.008	9.94343	10.4479	10.6002	10.3885	11.1299	11.1876	11.0042	12.5443	12.7022	12.3782
ENSG00000100142	9.42854	9.3888	9.48501	9.62797	9.45743	9.36754	9.65776	9.57451	9.67879	9.19462	9.34734	9.28747	9.21912	9.15061	9.51101	9.4108	9.22041	9.60946	9.11063	9.33073	9.39286
ENSG00000100147	5.60112	5.62287	6.01056	5.94924	5.70078	5.84799	6.06433	5.82751	6.18729	6.1878	6.00133	6.31238	6.03514	6.17097	6.03557	5.95014	5.7575	5.74302	5.50614	5.52858	5.6244
ENSG00000100150	8.37191	8.41045	8.39668	8.17986	8.43944	8.38725	8.26383	8.30894	8.07144	8.27563	8.44478	8.33039	8.46771	8.76437	8.37738	8.51553	8.34565	8.45803	8.40154	8.35304	8.42912
ENSG00000100151	9.76776	9.86516	9.64157	9.71949	9.81927	9.74302	9.61706	9.76831	9.67449	9.84362	9.89081	9.70238	9.84372	9.78224	9.8538	9.7652	9.86963	9.73294	9.91241	9.9495	9.93684
ENSG00000100154	9.95761	9.99811	10.0618	9.81993	9.97712	9.97432	9.84214	9.78601	9.74787	10.0522	10.0757	9.94798	10.0847	10.0706	9.92038	10.0142	10.1136	9.86966	10.4496	10.4446	10.3607
ENSG00000100162	4.21062	3.51582	3.08186	2.3179	3.05093	1.72691	1.6992	2.78082	3.25204	2.44311	3.44514	2.85113	2.81297	2.08053	2.93542	2.84213	2.56104	2.75457	2.08824	1.79214	2.86097
ENSG00000100167	3.75603	3.14222	3.08186	3.16545	2.21529	3.51044	3.61307	3.43127	2.21862	3.64837	2.23553	3.47254	4.11768	3.6828	4.01787	3.83016	3.53848	3.82165	4.10948	4.4281	4.49058
ENSG00000100196	9.76776	9.72094	9.71604	9.67972	9.70635	9.88549	9.67241	9.86838	9.85612	9.52868	9.73626	9.85663	9.797	9.77162	10.0424	9.91235	10.0191	10.0559	10.0308	10.1103	10.088
ENSG00000100197	4.24719	3.93675	2.85251	4.21247	4.44181	4.53323	3.51533	4.01266	3.65779	4.25875	3.6678	4.33229	4.47073	3.86331	2.37819	3.53337	4.01885	3.71111	4.49933	4.60694	4.94125
ENSG00000100201	13.7587	13.8279	13.9057	13.9172	13.7824	13.7867	13.9436	13.7546	13.8801	13.8596	13.829	13.7813	13.7398	13.8387	13.685	13.6882	13.8077	13.5873	13.6578	13.6905	13.6208
ENSG00000100207	9.66479	9.56067	9.67929	9.15232	9.50644	9.58058	9.17252	9.3635	9.29543	9.74857	9.73207	9.66421	9.74728	9.95805	9.76995	10.065	10.0461	9.96639	10.6073	10.6663	10.5975
ENSG00000100209	8.5796	8.43785	8.449	8.39586	8.57426	8.49741	8.19174	8.36997	8.45874	8.10474	8.42415	8.37497	7.94484	7.78539	8.19766	7.90627	7.83349	8.06109	7.55048	7.49841	7.47018
ENSG00000100211	9.62876	9.58048	9.52699	9.49282	9.67668	9.47916	9.44323	9.46689	9.4238	9.38286	9.52733	9.41937	9.45155	9.34941	9.45743	9.41826	9.33067	9.47774	9.05878	9.14234	9.00517
ENSG00000100216	10.0093	10.0488	10.09	10.1358	9.95786	9.92031	10.1505	10.1576	10.3082	9.87805	9.90762	9.87942	9.87844	9.79453	10.1232	10.0862	10.0371	10.1755	10.0263	10.105	10.0617
ENSG00000100218	2.85904	2.9115	2.57968	4.24316	3.84402	3.18359	3.7797	4.3628	3.25204	4.00806	2.57187	2.99866	3.12918	2.89903	3.39227	2.65288	2.74808	3.73533	1.05942	2.35205	2.19535
ENSG00000100219	13.274	13.3584	13.4564	13.5019	13.4144	13.4571	13.4104	13.4671	13.5162	13.2269	13.298	13.3329	13.1318	13.0617	13.2418	13.0806	13.1065	13.1548	12.9696	12.9297	12.9413
ENSG00000100220	11.2611	11.2663	11.2616	11.2184	11.217	11.2093	11.1215	11.3255	11.274	11.2311	11.0988	11.2699	11.2871	11.1155	11.2742	11.2984	11.1957	11.3548	11.3417	11.3704	11.3434
ENSG00000100221	10.7461	10.7134	10.7406	10.6788	10.6918	10.6632	10.7983	10.713	10.7212	10.8203	10.8529	10.8792	11.041	11.1343	11.0384	11.4692	11.4669	11.3004	12.2684	12.383	12.1147
ENSG00000100225	11.6905	11.7363	11.7729	11.8688	11.7536	11.7891	11.8577	11.8347	11.8873	11.7365	11.7454	11.8378	11.693	11.6729	11.7248	11.7603	11.6924	11.7226	11.7089	11.6063	11.6181
ENSG00000100226	10.049	10.1011	9.9464	9.87455	10.0081	9.89777	9.8172	9.95202	9.86933	10.1342	10.1577	9.95364	10.1051	10.203	10.0656	10.2019	10.2369	10.1611	10.969	11.1352	10.8851
ENSG00000100227	10.7793	10.8973	10.8584	10.7804	10.8425	10.8679	10.7959	10.7739	10.7572	10.8182	10.8432	10.7718	10.8651	10.7637	10.9118	10.9129	10.8619	10.7915	11.0173	10.9702	10.9815
ENSG00000100228	4.00115	4.05811	4.10255	4.38752	4.35285	4.00146	4.7262	4.14066	5.18296	4.83372	4.46072	4.64879	4.04428	4.4232	4.01787	3.63923	4.11585	4.53436	4.63518	4.05318	3.7581
ENSG00000100234	11.0695	11.0631	11.1356	11.1529	11.0731	11.062	11.1461	11.2422	11.269	11.2193	11.294	11.3821	11.4619	11.4294	11.4729	11.5418	11.6683	11.5249	12.0264	12.0232	11.9128
ENSG00000100239	11.4879	11.6417	11.4214	11.4212	11.5541	11.4624	11.3569	11.3921	11.3385	11.4841	11.5433	11.2383	11.3446	11.3195	11.4916	11.3025	11.3101	11.2905	11.1492	11.1602	11.0933
ENSG00000100241	11.8943	11.9522	11.76	11.6447	11.8005	11.7471	11.6571	11.7264	11.7374	12.0039	11.9974	11.765	11.975	12.1402	11.9937	12.1056	12.0735	12.0285	12.3362	12.4033	12.2621
ENSG00000100242	11.7551	11.8841	11.697	11.6532	11.8108	11.6771	11.7148	11.818	11.8106	11.7783	11.8717	11.7188	11.8228	11.9546	11.9072	11.8929	11.8263	11.7483	11.829	11.9067	11.7659
ENSG00000100243	14.2689	14.4496	14.3423	14.3379	14.4391	14.3957	14.312	14.4951	14.4053	14.1525	14.2625	14.1843	14.2064	14.2016	14.3906	14.2812	14.1517	14.1563	13.9304	13.8663	13.8382
ENSG00000100246	7.95833	7.78272	7.62668	7.76317	7.77089	8.0145	7.74474	8.09839	8.07144	7.60365	7.9195	7.88519	7.79068	7.96395	8.02951	7.68929	7.77551	7.93605	7.70837	7.84603	7.74756
ENSG00000100253	2.58599	2.9115	2.85251	2.9956	2.21529	3.35625	3.42464	3.97095	3.25204	3.54245	3.44514	2.85113	3.60804	2.67417	3.39227	3.0094	2.74808	2.56737	3.91583	3.32654	3.65936
ENSG00000100258	11.2574	11.3928	11.2027	11.3073	11.2761	11.1058	11.1767	11.3337	11.3338	11.1961	11.3011	11.0764	11.1888	11.1391	11.357	11.2276	11.1866	11.1269	11.0619	11.0848	11.0299
ENSG00000100263	8.93344	8.87876	8.89604	8.97797	9.08724	8.89404	8.83663	9.19546	9.039	8.91317	9.07706	8.88451	8.85337	8.99493	9.13309	9.11072	8.89859	8.97373	9.02315	9.04926	8.89285
ENSG00000100266	11.3024	11.2898	11.1927	11.0884	11.2733	11.1873	11.0596	11.244	11.0911	11.3438	11.3367	11.2857	11.575	11.6681	11.543	11.9449	11.9049	11.8176	12.6285	12.6697	12.5428
ENSG00000100271	7.84515	7.80814	7.63574	7.79589	7.72193	7.78442	7.47396	8.00803	7.83022	7.9631	7.79652	7.85162	8.03285	7.79241	8.19298	7.80754	7.52982	7.97895	7.53369	7.56873	7.45554
ENSG00000100276	1.80823	3.51582	1.1664	1.99623	1.14703	1.10775	1.32086	1.97681	2.21862	1.47262	2.57187	2.85113	1.44471	1.05418	1.94482	3.41912	2.91363	1.79229	4.19736	4.372	4.09677
ENSG00000100280	11.6223	11.6892	11.5968	11.4275	11.7056	11.4807	11.3142	11.5846	11.435	11.5867	11.6148	11.4792	11.4729	11.4534	11.6147	11.4402	11.2909	11.3848	11.3124	11.2318	11.2382
ENSG00000100281	8.67983	8.62112	8.52408	8.56863	8.6284	8.53833	8.61477	8.51982	8.60131	8.75914	8.59534	8.70007	8.68551	8.68734	8.40594	8.50156	8.43008	8.45803	8.66694	8.51399	8.50927
ENSG00000100284	11.2714	11.4565	11.3364	11.2571	11.3993	11.3722	11.1508	11.3905	11.2832	11.2921	11.3775	11.1921	11.3093	11.3608	11.4719	11.5229	11.4337	11.4172	11.6915	11.7662	11.6502
ENSG00000100285	4.00115	3.14222	3.45366	2.58077	3.71653	2.98742	2.80582	3.67184	3.25204	2.44311	4.09372	3.47254	4.25413	3.6828	3.73872	3.99875	3.53848	3.82165	4.28019	3.06865	4.17033
ENSG00000100288	10.1161	10.1878	9.98697	10.0622	10.0556	10.113	9.85541	9.9357	9.93456	10.1285	10.0797	9.82667	9.97521	10.03	9.98473	9.98905	9.94895	9.94574	9.8088	9.90089	9.8615
ENSG00000100290	6.72914	6.10538	6.2652	6.51858	6.27647	6.35503	6.48205	6.68354	6.65663	6.62409	6.00133	6.44695	6.40124	6.31447	6.57056	6.65268	6.69944	7.01245	6.57465	6.81595	6.28485
ENSG00000100292	7.89149	8.24657	8.38061	8.25237	8.42421	8.34687	8.29857	8.4529	8.38706	8.3599	8.74003	8.4697	9.51914	9.84607	9.63857	11.1412	11.1383	10.8021	12.9641	13.1181	12.7171
ENSG00000100294	8.22884	8.34827	8.41258	8.33928	8.48905	8.13795	8.27783	8.39535	8.50301	8.32039	8.34955	8.40173	8.36972	8.33488	8.4922	8.36551	8.38848	8.54941	8.22461	8.34577	8.24985
ENSG00000100296	10.0575	10.1582	10.0999	10.038	10.2358	10.1297	9.95205	9.913	9.87496	10.1262	10.0524	9.99926	10.0755	10.2637	10.0514	9.97055	9.85951	9.90962	9.77099	9.55989	9.74402
ENSG00000100297	8.59368	8.22786	8.41784	8.56483	8.46941	8.30006	8.36563	8.59478	8.54596	8.59663	8.50984	8.48855	8.49895	8.54074	8.50358	8.21099	8.26749	8.39608	7.69334	7.89164	7.90129
ENSG00000100298	5.31408	5.50346	5.16376	5.63892	5.70078	5.28976	5.54515	5.61348	5.44744	5.50403	5.50818	5.28802	4.65014	4.91009	4.92832	4.99339	4.6728	5.04559	4.0159	3.44004	4.01926
ENSG00000100299	10.4548	10.4868	10.4041	10.5448	10.5737	10.3499	10.5391	10.5332	10.5501	10.4131	10.6223	10.4682	10.3408	10.4462	10.549	10.3966	10.4106	10.3536	10.2913	10.3443	10.226
ENSG00000100300	6.88996	6.44488	6.19341	6.60973	5.91921	5.59571	6.15811	6.47713	6.6034	6.20526	6.5505	6.67248	6.48683	6.23422	6.59912	6.62718	6.65335	6.7626	7.69334	7.56248	7.38003
ENSG00000100304	10.8592	10.9101	10.6904	10.7557	10.8146	10.7246	10.7331	10.8631	10.8247	10.8004	10.8078	10.7744	11.0107	11.0386	10.9594	11.1954	11.0855	11.0463	11.1622	11.1711	11.0525
ENSG00000100307	6.22522	6.13247	6.21774	6.01741	6.10887	6.13557	5.7598	5.94677	5.80264	6.41489	6.10862	5.52555	5.64614	5.83239	5.68224	5.752	5.77912	5.69809	5.8423	5.42209	5.59798
ENSG00000100311	8.54619	8.56755	8.09565	8.19466	8.36166	8.15559	8.20645	8.44481	8.24367	8.6098	8.50494	8.54065	8.72127	8.70233	8.64723	8.8436	8.71727	8.76627	9.70506	9.73552	9.46954
ENSG00000100312	5.48502	5.41798	5.05993	5.12439	5.07868	5.36124	5.01296	5.55461	4.91819	5.16526	5.50818	5.13693	4.49352	4.49383	4.91974	4.52597	4.42104	4.63315	4.18967	2.92006	3.02857
ENSG00000100316	14.3445	14.3109	14.2029	14.2226	14.2729	14.2723	13.9971	14.3701	14.2337	14.091	14.2013	14.1583	14.1119	14.0519	14.3079	14.2483	14.1358	14.3267	14.2777	14.391	14.2564
ENSG00000100319	8.44624	8.48064	8.64562	8.48683	8.63723	8.48816	8.40442	8.56153	8.65025	8.22517	8.51959	8.49478	8.43219	8.31551	8.81181	8.72839	8.43008	8.65898	8.24021	8.39938	8.24985
ENSG00000100320	11.3701	11.3858	11.3883	11.3684	11.3383	11.3665	11.3361	11.3266	11.2661	11.4728	11.318	11.355	11.335	11.2906	11.3037	11.1818	11.2057	11.1401	11.0706	10.9191	11.0695
ENSG00000100321	5.48502	5.58415	5.55603	5.54966	5.88995	5.41222	5.23666	5.75092	5.27661	5.47553	5.25147	5.10472	5.28117	6.05895	5.24978	5.54967	5.2999	5.3944	4.75587	5.00906	4.88948
ENSG00000100324	9.8126	9.89117	9.70318	9.66563	9.79974	9.69357	9.55664	9.88192	9.72935	9.7336	9.8156	9.66144	9.6701	9.73199	9.7172	9.56315	9.56343	9.60795	9.09069	8.99458	9.14173
ENSG00000100325	10.6324	10.6243	10.484	10.4275	10.7621	10.5354	10.485	10.568	10.5181	10.5679	10.6983	10.5445	10.7268	10.696	10.7446	10.7789	10.6391	10.6976	10.9027	11.0023	10.881
ENSG00000100330	10.4209	10.5244	10.549	10.5351	10.4236	10.4173	10.4926	10.3805	10.4215	10.5971	10.5105	10.4972	10.5673	10.6062	10.5147	10.5748	10.613	10.4842	10.8738	10.947	10.8457
ENSG00000100335	10.7012	10.7122	10.8092	10.8599	10.7691	10.7557	10.7831	10.6764	10.8179	10.8574	10.8635	10.7865	10.8073	10.7858	10.7486	10.6785	10.6626	10.6585	10.4707	10.4648	10.4722
ENSG00000100336	5.84041	6.2851	6.63396	6.31696	6.23054	5.87663	5.61296	6.4123	5.67086	5.68915	6.2791	5.98086	5.11189	5.53029	5.41949	4.73143	4.47503	4.72561	3.8083	3.44004	4.09677
ENSG00000100342	9.27677	9.65709	9.30938	9.29647	9.57467	9.5784	9.20218	9.46289	9.24129	9.3121	9.32468	9.23635	9.20866	9.1857	9.14766	8.84637	8.7395	8.80652	8.50848	8.59281	8.50927
ENSG00000100344	10.4903	10.9053	10.626	10.664	10.7222	10.7834	10.8014	10.3774	10.6366	10.5155	10.5057	10.4941	10.3158	10.6358	10.194	9.99941	10.2707	9.90356	9.79768	9.59861	9.6667
ENSG00000100345	14.618	14.5	14.3058	13.9789	14.3672	14.304	13.8977	14.2298	14.0652	14.7295	14.6083	14.4725	14.7554	14.8361	14.7071	14.9534	14.7978	14.9292	15.5082	15.5343	15.4366
ENSG00000100347	10.1667	10.1432	10.201	10.2152	10.2431	10.1459	10.3516	10.3645	10.2646	10.1989	10.2037	10.116	10.2199	10.1574	10.1869	10.0338	10.0649	10.1579	9.73465	9.7562	9.82027
ENSG00000100348	10.7885	10.9807	10.8795	11.0166	10.9124	10.929	10.9115	11.0236	10.9437	10.6491	10.7878	10.7686	10.6577	10.5221	10.7987	10.5495	10.6347	10.694	10.2975	10.3268	10.2442
ENSG00000100350	8.74016	8.92983	8.79457	8.77634	8.65473	8.74276	8.85075	8.63085	8.61033	8.70493	8.87913	8.75299	8.92667	8.75361	8.8832	8.69195	8.80946	8.85849	8.58785	8.45782	8.5919
ENSG00000100353	10.9605	10.8934	10.8281	10.754	10.9242	10.9769	10.6441	11.0229	10.8686	10.9083	11.0676	10.9444	11.1084	11.0275	11.1458	11.3065	11.2171	11.3334	11.5932	11.6117	11.6291
ENSG00000100354	9.97385	10.1028	10.0801	9.95062	10.0047	10.0454	10.0192	9.86989	9.89909	10.1422	10.134	10.129	9.94044	10.0778	9.81477	9.69482	9.76651	9.69485	9.17428	9.19584	9.32603
ENSG00000100359	11.2125	11.181	11.0129	10.9713	11.1318	11.0373	11.044	11.1537	11.0543	11.0365	11.1148	10.9246	11.0608	11.072	11.123	11.0618	10.9285	11.049	10.9708	10.9633	10.9017
ENSG00000100360	9.63785	9.6687	9.58659	9.68846	9.7879	9.66306	9.79182	9.62903	9.77018	9.55616	9.55368	9.45973	9.30999	9.33746	9.37314	9.04	8.96613	9.05617	8.59596	8.68779	8.44031
ENSG00000100364	11.1271	10.9919	10.9393	10.8373	10.965	10.9893	10.814	10.9788	10.9789	11.184	11.1476	11.1463	11.4698	11.4885	11.3808	11.8178	11.7331	11.6918	12.2763	12.2872	12.218
ENSG00000100372	8.76527	8.53239	8.81464	8.82153	8.64601	8.72318	8.89	8.68331	8.7475	8.51497	8.60453	8.77107	8.7035	8.49412	8.82093	8.61619	8.71727	8.77712	9.0381	9.15279	9.01518
ENSG00000100373	5.74267	5.58415	6.01056	5.63892	5.596	6.20498	5.67773	5.80243	5.67086	5.25853	6.02891	5.70816	5.24887	5.05729	5.45116	4.07619	5.07363	4.89445	3.56572	3.54526	4.01926
ENSG00000100376	9.8246	9.9089	9.8621	9.75984	9.92399	9.75465	9.8919	9.68328	9.64406	9.90634	9.90576	9.76169	9.93918	9.85448	9.86266	9.77829	9.80259	9.69485	9.69755	9.51364	9.77383
ENSG00000100379	7.22763	7.08103	7.14598	6.80237	6.72047	6.54547	6.82478	7.15903	7.16516	7.31286	7.45401	7.04773	6.87333	7.00036	7.10638	6.99934	7.17764	7.27973	7.67049	7.90652	7.62863
ENSG00000100380	12.5081	12.578	12.6378	12.6405	12.6681	12.6916	12.5883	12.6601	12.622	12.4995	12.5548	12.621	12.503	12.4699	12.5438	12.6487	12.5845	12.6482	12.7967	12.7845	12.7472
ENSG00000100385	4.21062	3.14222	4.69434	3.16545	3.84402	3.89347	3.61307	3.77859	3.42564	4.47917	3.0736	3.66156	3.2646	4.4232	2.74412	2.84213	3.6365	3.54545	3.56572	2.92006	1.88167
ENSG00000100387	9.76983	9.69164	9.7705	9.81993	9.57926	9.7946	9.77341	9.92031	9.93004	9.46125	9.44782	9.51746	9.30214	9.40774	9.56086	9.46399	9.46514	9.79561	9.33547	9.59707	9.50017
ENSG00000100393	11.46	11.4994	11.3673	11.1755	11.4484	11.4499	11.1441	11.1656	11.2482	11.6427	11.481	11.4434	11.5002	11.5862	11.4367	11.4589	11.4165	11.4862	11.6811	11.5922	11.6417
ENSG00000100395	9.39408	9.48913	9.52456	9.33036	9.45743	9.32401	9.31676	9.43664	9.2267	9.43003	9.45037	9.37279	9.2982	9.30591	9.39773	9.03759	9.13285	9.12992	8.79922	8.68203	8.76809
ENSG00000100399	2.2489	1.85184	3.08186	2.58077	3.24824	1.72691	2.80582	3.1424	2.55401	2.44311	3.44514	3.74753	3.50239	2.89903	4.10009	3.15928	1.78688	3.20354	1.66366	2.09909	2.45286
ENSG00000100401	11.0139	10.8914	10.8262	10.8112	10.7631	10.6653	10.78	10.9655	10.7774	11.0772	11.0923	10.9859	11.1517	11.1998	11.2004	11.4557	11.4221	11.3616	11.9517	11.9921	11.9034
ENSG00000100403	11.6325	11.769	11.509	11.337	11.5938	11.5316	11.3461	11.4568	11.3035	11.7702	11.699	11.6068	11.7083	11.7035	11.662	11.657	11.5698	11.5928	11.7047	11.7125	11.6405
ENSG00000100410	8.21068	8.34248	8.4795	8.54187	8.55576	8.44099	8.51194	8.6057	8.4079	8.39456	8.2651	8.43125	8.58558	8.26592	8.58077	8.6387	8.49685	8.77712	8.74557	9.03804	8.87096
ENSG00000100412	11.6142	11.7396	11.6072	11.5351	11.6646	11.6157	11.3696	11.6581	11.4775	11.5124	11.6082	11.4538	11.3823	11.3958	11.5198	11.3085	11.2914	11.3334	11.3253	11.3249	11.2647
ENSG00000100413	9.0504	9.03763	9.05975	8.88979	9.13165	9.08411	8.91931	9.14397	9.1668	8.99576	9.20649	9.17949	9.18751	9.15606	9.28581	9.32219	9.29735	9.31615	9.36661	9.3902	9.35787
ENSG00000100416	9.68904	9.70072	9.55113	9.5244	9.77795	9.59142	9.45251	9.69184	9.48148	9.68776	9.68949	9.51286	9.79421	9.64543	9.66582	9.60458	9.55562	9.52996	9.35471	9.35264	9.50551
ENSG00000100417	11.0042	11.1658	10.9429	11.0798	11.0559	11.0989	11.0772	11.176	11.134	10.8097	10.9899	10.8382	10.9315	10.9177	11.0174	10.9287	10.8889	10.9333	10.4816	10.4732	10.4992
ENSG00000100418	11.9	12.0003	12.0574	12.028	11.9916	12.0613	12.1778	12.0511	12.1211	11.9202	12.0489	11.9985	12.1279	12.1651	12.1127	12.2378	12.2568	12.1208	12.2458	12.1874	12.1614
ENSG00000100422	10.606	10.7122	10.7034	10.6718	10.6928	10.772	10.6569	10.6686	10.641	10.6087	10.6132	10.6585	10.5746	10.58	10.5824	10.529	10.4938	10.5023	10.5881	10.7193	10.509
ENSG00000100425	9.80657	9.91476	9.80904	9.50673	9.86884	9.71554	9.59067	9.7105	9.61522	9.94453	9.96407	9.73826	10.0335	10.0011	9.91471	10.0543	10.0111	9.89477	10.1178	10.0479	10.1104
ENSG00000100426	10.0727	10.1215	10.1856	10.0543	9.94903	9.96934	10.1991	10.106	10.164	10.2845	10.2307	10.2342	10.3833	10.4911	10.2956	10.5264	10.6362	10.4659	10.7302	10.8438	10.728
ENSG00000100429	10.1915	10.2577	10.0383	9.99774	10.0974	10.0318	10.0005	10.0764	10.1225	10.1335	10.2287	9.94531	10.1192	10.2055	10.1701	10.1066	9.99872	9.91901	9.70918	9.65118	9.65651
ENSG00000100433	5.22037	5.1791	5.43674	5.20456	4.97106	5.33175	4.98695	5.2917	5.44744	5.38649	5.25147	4.85651	3.96696	4.8029	4.97264	4.28631	3.06212	3.64351	2.68268	1.79214	1.88167
ENSG00000100439	11.2471	11.4362	11.3336	11.4075	11.4665	11.343	11.2672	11.5298	11.3701	11.4074	11.4218	11.3137	11.6242	11.6373	11.6867	11.8663	11.8194	11.7867	11.9857	12.0424	11.9081
ENSG00000100441	11.5769	11.6113	11.6719	11.5658	11.5847	11.5954	11.4378	11.5341	11.5508	11.6103	11.6482	11.5656	11.6226	11.7072	11.5421	11.6174	11.7244	11.5472	11.9822	12.0137	11.8813
ENSG00000100442	10.7762	10.7223	10.7395	10.7144	10.8615	10.8143	10.712	10.8539	10.7613	10.5813	10.5575	10.7466	10.6368	10.5008	10.6708	10.6471	10.546	10.7167	10.4484	10.4378	10.6033
ENSG00000100445	10.0877	10.1232	10.09	10.1074	10.1644	10.0935	10.111	10.1821	10.0526	9.95102	10.0674	9.88061	10.0083	9.99808	10.1975	10.1736	9.96468	10.0593	9.91565	9.9978	9.8625
ENSG00000100461	10.3591	10.3679	10.3908	10.318	10.3783	10.3915	10.4052	10.3549	10.3532	10.376	10.3626	10.4101	10.3215	10.2924	10.3247	10.2212	10.283	10.1908	10.0097	9.96499	10.0287
ENSG00000100462	9.80657	9.84279	9.82695	9.8514	9.97189	9.84076	9.78448	9.85929	9.81574	9.80405	9.94067	9.87584	9.95803	10.0072	10.0002	10.1094	10.0802	10.1734	10.2236	10.2762	10.2303
ENSG00000100473	5.12014	4.76001	4.88868	4.45463	5.02587	4.59107	5.05355	5.13979	4.35689	5.32393	4.68532	5.45064	4.96053	4.18782	4.83537	5.14486	4.71828	5.30732	5.92185	5.8077	5.88692
ENSG00000100478	7.07536	7.22639	7.26749	7.21417	7.2326	7.31513	7.44324	7.19802	7.35961	7.23849	7.03152	7.13006	7.37782	7.04809	7.07623	7.09547	7.27216	7.06649	7.44672	7.49841	7.23329
ENSG00000100479	5.77599	5.41798	6.01056	5.92579	5.63178	6.0119	5.92898	5.85217	5.80264	5.6127	5.29756	5.66463	5.69492	5.38918	5.54221	5.67941	5.00188	5.4223	3.42719	4.63295	4.43196
ENSG00000100483	7.57865	7.82484	7.93619	7.88373	7.97271	7.90752	8.00244	7.92912	7.93447	7.75359	7.90469	7.68187	7.87247	7.50668	7.95415	7.79614	7.78622	7.63002	7.51671	7.68842	7.67991
ENSG00000100485	9.95033	9.82422	10.0157	9.94041	9.9684	10.0391	9.95749	9.84708	9.91738	10.0437	10.049	10.1499	10.104	10.1356	9.947	10.0374	10.0932	10.0233	10.3536	10.2618	10.1799
ENSG00000100490	5.01242	4.36262	4.88868	3.99528	4.06949	4.44571	4.30208	4.14066	3.72046	4.15906	4.09372	4.69279	4.25413	4.49383	4.01787	3.99875	4.62584	4.68012	5.11299	5.30712	5.05399
ENSG00000100503	9.49007	9.7187	9.799	9.62068	9.80171	9.79647	9.56807	9.36992	9.45418	9.82256	9.78963	9.71043	9.54431	9.64737	9.23668	9.26958	9.17627	9.20812	9.00804	9.23765	9.1599
ENSG00000100504	13.3148	13.3948	13.3686	13.3496	13.4132	13.4264	13.2106	13.4097	13.2632	13.2919	13.3088	13.3025	13.177	13.1365	13.1789	12.8763	12.8648	12.9376	12.2419	12.076	12.2409
ENSG00000100505	6.54811	6.44488	6.06521	6.57998	6.46678	6.31372	6.54126	6.50849	6.43081	5.93919	5.91527	6.19489	5.34369	5.14769	5.13745	4.68274	5.0382	4.4823	4.10948	5.98649	5.30324
ENSG00000100519	10.7747	10.6782	10.7517	10.7334	10.7608	10.8759	10.7172	10.8373	10.8082	10.7704	10.744	10.8534	10.8569	10.7896	10.8238	10.835	10.8766	10.904	10.9488	10.9468	10.9394
ENSG00000100522	11.0829	11.2157	11.2841	11.2873	11.2633	11.2205	11.4107	11.2682	11.3228	11.1415	11.2301	11.2817	11.2084	11.2344	11.1421	11.1959	11.2862	11.1438	11.3087	11.2412	11.242
ENSG00000100523	8.75277	8.63539	8.83051	8.85916	8.76356	8.78115	8.8624	8.64503	8.7997	8.97809	9.00598	8.87499	9.02055	9.01908	8.77474	9.05443	9.13704	8.96428	9.48701	9.49241	9.46771
ENSG00000100526	6.46882	5.93123	6.09178	6.24296	6.20701	6.06265	6.09627	6.01386	6.54814	6.02035	5.82375	6.16396	5.85371	5.85939	5.6553	5.57657	5.46908	5.94883	5.06708	5.1154	5.16612
ENSG00000100528	11.0518	10.8904	11.2543	11.3415	11.1902	11.1694	11.3428	11.2785	11.4209	11.121	11.0609	11.3221	11.1766	11.1589	11.1945	11.2051	11.29	11.3661	11.3368	11.2412	11.3086
ENSG00000100532	8.02221	7.85767	8.286	8.34813	8.21605	8.17302	8.30883	8.2683	8.31162	8.11401	8.1692	8.1839	8.4068	8.089	8.27491	8.30245	8.43349	8.58687	8.72723	8.63215	8.82329
ENSG00000100554	9.9115	9.85504	9.99119	10.11	10.045	10.0689	10.1362	10.0671	10.1236	9.80405	9.82939	10.074	9.8758	9.82053	10.0214	10.0721	10.0111	10.1517	10.4293	10.4682	10.4676
ENSG00000100557	8.84985	8.32498	8.34792	8.18974	8.36698	8.40211	8.29513	8.38694	8.55534	8.71715	8.64965	8.57044	9.01336	8.95481	8.98408	9.14032	9.06406	9.13203	8.778	8.45445	8.76809
ENSG00000100558	6.01802	5.32712	5.16376	5.16503	5.52166	5.78893	5.29288	5.2917	5.77081	5.91817	5.72604	6.10003	6.162	5.80487	6.3019	6.91754	6.26624	6.62534	8.52556	8.56805	8.44403
[truncated: 12,872 more rows]
